# Supplementary material
Source: publisher site journal article supplement (https://www.dovepress.com/article/309576)
Supplement: Supplementary file 1 [file get_supplementary_file.php]

---

**Supplementary Table 1** MMP28 siRNAs' sequence

| siRNA   | Sense 5'-3'             | Antisense 5'-3'         |
|---------|-------------------------|-------------------------|
| siRNA-1 | GCGUAAGAAACGCUUUGCAAATT | UUUGCAAAGCGUUUCUUACGCTT |
| siRNA-2 | GCAUCCUAGAGAAGUACGGATT  | UCCGUACUUCUCUAGGAAUGCTT |
| siRNA-3 | CUGAAACGCAGGGCCCUAAAUTT | AUUUAGGGCCUGCGUUUCAGTT  |

**Supplementary Table 2** Most differential survival gene (Disease Free Survival) top 20 in PAAD

| Gene Symbol   | Gene ID            | P-value |
|---------------|--------------------|---------|
| NAIP          | ENSG00000249437.7  | 4.88e-7 |
| RP11-54H7.4   | ENSG00000275216.1  | 1.30e-6 |
| NSUN6         | ENSG00000241058.3  | 4.53e-6 |
| ZNF775        | ENSG00000196456.8  | 5.76e-6 |
| RP11-2B6.2    | ENSG00000269929.1  | 1.37e-5 |
| HIST1H1B      | ENSG00000184357.4  | 1.46e-5 |
| RP11-258C19.7 | ENSG00000270189.1  | 1.52e-5 |
| LINC00641     | ENSG00000258441.1  | 1.77e-5 |
| AQP4-AS1      | ENSG00000260372.6  | 1.96e-5 |
| COL9A2        | ENSG00000049089.13 | 2.46e-5 |
| RP11-111K18.2 | ENSG00000261019.1  | 2.47e-5 |
| CH17-340M24.3 | ENSG00000197180.2  | 2.52e-5 |
| RP11-130F10.1 | ENSG00000250131.1  | 2.68e-5 |
| S100A16       | ENSG00000188643.10 | 2.68e-5 |
| RP11-16N11.2  | ENSG00000260572.1  | 2.75e-5 |
| RP11-710F7.3  | ENSG00000249635.1  | 2.79e-5 |
| MMP28         | ENSG00000271447.5  | 2.85e-5 |
| RP11-269C23.5 | ENSG00000277831.1  | 2.87e-5 |
| SPRN          | ENSG00000203772.7  | 2.89e-5 |
| FKBP1A        | ENSG00000088832.14 | 3.16e-5 |

**Supplementary Table 3** MMP28 correlated genes from LinkedOmics

| Query    | Statistic | P-value  | FDR (BH) |
|----------|-----------|----------|----------|
| A1BG     | -0.09482  | 0.208048 | 0.307584 |
| A1CF     | -0.23064  | 0.001953 | 0.006108 |
| A2BP1    | -0.24626  | 0.000921 | 0.003198 |
| A2LD1    | 0.255155  | 0.000588 | 0.002181 |
| A2ML1    | 0.4395    | 8.38E-10 | 1.82E-08 |
| A2M      | -0.03126  | 0.678716 | 0.763725 |
| A4GALT   | 0.182717  | 0.01464  | 0.034168 |
| A4GNT    | 0.10927   | 0.146523 | 0.231887 |
| AAA1     | 0.213291  | 0.004255 | 0.011925 |
| AAAS     | -0.12174  | 0.105488 | 0.178407 |
| AACSL    | -0.11666  | 0.120957 | 0.198524 |
| AACS     | -0.23847  | 0.001348 | 0.004439 |
| AADACL2  | 0.063254  | 0.401575 | 0.514254 |
| AADACL3  | -0.08135  | 0.280392 | 0.388786 |
| AADACL4  | -0.0723   | 0.337503 | 0.449867 |
| AADAC    | 0.265161  | 0.000348 | 0.001394 |
| AADAT    | -0.10779  | 0.152101 | 0.239025 |
| AAGAB    | 0.080969  | 0.282636 | 0.391294 |
| AAK1     | -0.37602  | 2.31E-07 | 2.43E-06 |
| AAMP     | 0.330781  | 6.49E-06 | 4.47E-05 |
| AANAT    | -0.01807  | 0.810811 | 0.866086 |
| AARS2    | -0.13219  | 0.078587 | 0.140074 |
| AARSD1   | 0.059751  | 0.428207 | 0.540321 |
| AARS     | -0.16659  | 0.026248 | 0.055918 |
| AASDHPPT | -0.38647  | 9.91E-08 | 1.15E-06 |
| AASDH    | -0.46669  | 5.17E-11 | 1.57E-09 |
| AASS     | 0.02004   | 0.790618 | 0.851926 |
| AATF     | 0.399969  | 3.18E-08 | 4.27E-07 |
| AATK     | 0.06886   | 0.361074 | 0.474222 |
| ABAT     | -0.2374   | 0.001419 | 0.004642 |
| ABCA10   | -0.27376  | 0.000218 | 0.00093  |
| ABCA11P  | -0.1723   | 0.021458 | 0.047068 |
| ABCA12   | 0.360165  | 7.89E-07 | 7.08E-06 |
| ABCA13   | 0.364128  | 5.84E-07 | 5.44E-06 |
| ABCA17P  | -0.07518  | 0.318558 | 0.43027  |
| ABCA1    | -0.27463  | 0.000207 | 0.000893 |
| ABCA2    | -0.15586  | 0.037759 | 0.075933 |
| ABCA3    | -0.3419   | 3.00E-06 | 2.27E-05 |
| ABCA4    | 0.067468  | 0.370887 | 0.484075 |
| ABCA5    | -0.44984  | 2.99E-10 | 7.43E-09 |
| ABCA6    | -0.10876  | 0.14842  | 0.234263 |
| ABCA7    | 0.201837  | 0.006898 | 0.018026 |
| ABCA8    | -0.16608  | 0.026719 | 0.05678  |
| ABCA9    | -0.24285  | 0.00109  | 0.003698 |
| ABCB10   | -0.16935  | 0.023835 | 0.051549 |
| ABCB11   | 0.20766   | 0.005413 | 0.01464  |
| ABCB1    | -0.25239  | 0.000677 | 0.002456 |
| ABCB4    | -0.18244  | 0.014792 | 0.034447 |
| ABCB5    | -0.12868  | 0.086926 | 0.15218  |
| ABCB6    | -0.11802  | 0.11664  | 0.19298  |
| ABCB7    | 0.063976  | 0.396216 | 0.508984 |
| ABCB8    | -0.0129   | 0.864265 | 0.90591  |

|         |          |          |          |
|---------|----------|----------|----------|
| ABCB9   | 0.071605 | 0.342206 | 0.454481 |
| ABCC10  | 0.135218 | 0.071924 | 0.130181 |
| ABCC11  | 0.110651 | 0.141458 | 0.225435 |
| ABCC12  | -0.24709 | 0.000884 | 0.003094 |
| ABCC13  | 0.178345 | 0.017229 | 0.039155 |
| ABCC1   | 0.120897 | 0.107944 | 0.181797 |
| ABCC2   | -0.1438  | 0.055503 | 0.104765 |
| ABCC3   | 0.510403 | 3.39E-13 | 1.78E-11 |
| ABCC4   | -0.21964 | 0.003221 | 0.009384 |
| ABCC5   | -0.07872 | 0.296241 | 0.406232 |
| ABCC6P1 | 0.030303 | 0.688025 | 0.77139  |
| ABCC6P2 | -0.02786 | 0.712032 | 0.790507 |
| ABCC6   | -0.02815 | 0.709164 | 0.78812  |
| ABCC8   | -0.18022 | 0.016075 | 0.036952 |
| ABCC9   | -0.33273 | 5.68E-06 | 3.98E-05 |
| ABCD1   | 0.042624 | 0.572122 | 0.671894 |
| ABCD2   | -0.29852 | 5.18E-05 | 0.00027  |
| ABCD3   | -0.0636  | 0.399016 | 0.511616 |
| ABCD4   | 0.15798  | 0.035195 | 0.071615 |
| ABCE1   | -0.09491 | 0.207601 | 0.306992 |
| ABCF1   | 0.009561 | 0.89921  | 0.929627 |
| ABCF2   | -0.14843 | 0.048001 | 0.092846 |
| ABCF3   | -0.06777 | 0.368743 | 0.482244 |
| ABCG1   | -0.01674 | 0.824503 | 0.875767 |
| ABCG2   | -0.23263 | 0.001779 | 0.005643 |
| ABCG4   | -0.00745 | 0.921354 | 0.945452 |
| ABCG5   | -0.1613  | 0.031482 | 0.065193 |
| ABCG8   | -0.01141 | 0.879868 | 0.916628 |
| ABHD10  | -0.25729 | 0.000526 | 0.001985 |
| ABHD11  | 0.325587 | 9.22E-06 | 6.05E-05 |
| ABHD12B | -0.09264 | 0.218738 | 0.320308 |
| ABHD12  | -0.06281 | 0.404914 | 0.5175   |
| ABHD13  | -0.08168 | 0.278406 | 0.386628 |
| ABHD14A | -0.1694  | 0.023785 | 0.051452 |
| ABHD14B | 0.25125  | 0.000717 | 0.002588 |
| ABHD15  | -0.22979 | 0.002032 | 0.006319 |
| ABHD1   | -0.12004 | 0.110481 | 0.185187 |
| ABHD2   | 0.219932 | 0.00318  | 0.009281 |
| ABHD3   | 0.120098 | 0.11031  | 0.184979 |
| ABHD4   | 0.242616 | 0.001102 | 0.003734 |
| ABHD5   | -0.00026 | 0.997217 | 0.997799 |
| ABHD6   | -0.28406 | 0.000122 | 0.000565 |
| ABHD8   | -0.07892 | 0.295054 | 0.40497  |
| ABI1    | 0.222934 | 0.00278  | 0.008279 |
| ABI2    | -0.26144 | 0.000424 | 0.001648 |
| ABI3BP  | -0.08211 | 0.275866 | 0.383802 |
| ABI3    | -0.00138 | 0.985432 | 0.989849 |
| ABL1    | -0.32812 | 7.78E-06 | 5.22E-05 |
| ABL2    | -0.17643 | 0.018481 | 0.041513 |
| ABLIM1  | 0.015962 | 0.832517 | 0.881138 |
| ABLIM2  | -0.16764 | 0.025306 | 0.054173 |
| ABLIM3  | 0.548594 | 2.24E-15 | 1.87E-13 |
| ABO     | 0.354651 | 1.19E-06 | 1.01E-05 |
| ABP1    | 0.43728  | 1.04E-09 | 2.18E-08 |

|        |          |          |          |
|--------|----------|----------|----------|
| ABRA   | -0.10222 | 0.17455  | 0.266907 |
| ABR    | -0.15906 | 0.033942 | 0.069473 |
| ABT1   | -0.01876 | 0.803702 | 0.861571 |
| ABTB1  | 0.265709 | 0.000337 | 0.001356 |
| ABTB2  | 0.425915 | 3.08E-09 | 5.67E-08 |
| ACAA1  | 0.332562 | 5.75E-06 | 4.02E-05 |
| ACAA2  | -0.01697 | 0.822129 | 0.873998 |
| ACACA  | -0.02491 | 0.741368 | 0.81353  |
| ACACB  | -0.45142 | 2.55E-10 | 6.41E-09 |
| ACAD10 | -0.15452 | 0.039455 | 0.078831 |
| ACAD11 | 0.048169 | 0.523147 | 0.628705 |
| ACAD8  | -0.13005 | 0.083582 | 0.147357 |
| ACAD9  | 0.179075 | 0.016771 | 0.038279 |
| ACADL  | -0.04105 | 0.586403 | 0.68487  |
| ACADM  | -0.46351 | 7.25E-11 | 2.12E-09 |
| ACADSB | -0.35641 | 1.05E-06 | 9.03E-06 |
| ACADS  | 0.194734 | 0.009194 | 0.022969 |
| ACADVL | -0.11082 | 0.140857 | 0.224622 |
| ACAN   | 0.009314 | 0.901795 | 0.931326 |
| ACAP1  | 0.059631 | 0.429137 | 0.54108  |
| ACAP2  | -0.11351 | 0.131383 | 0.212357 |
| ACAP3  | -0.0452  | 0.549115 | 0.651557 |
| ACAT1  | -0.43227 | 1.69E-09 | 3.34E-08 |
| ACAT2  | 0.213197 | 0.004273 | 0.011965 |
| ACBD3  | 0.034629 | 0.646313 | 0.736356 |
| ACBD4  | 0.171908 | 0.021763 | 0.04763  |
| ACBD5  | 0.066688 | 0.376454 | 0.489287 |
| ACBD6  | 0.227876 | 0.002219 | 0.006826 |
| ACBD7  | 0.01322  | 0.860971 | 0.903415 |
| ACCN1  | -0.16504 | 0.027703 | 0.058506 |
| ACCN2  | 0.00678  | 0.928426 | 0.950489 |
| ACCN3  | 0.01505  | 0.841956 | 0.888365 |
| ACCN4  | -0.07971 | 0.290209 | 0.399651 |
| ACCN5  | -0.05795 | 0.442249 | 0.554044 |
| ACCSL  | -0.02753 | 0.715311 | 0.792901 |
| ACCS   | 0.160697 | 0.032129 | 0.066331 |
| ACD    | 0.155577 | 0.03811  | 0.076513 |
| ACE2   | 0.116736 | 0.120711 | 0.198259 |
| ACER1  | -0.10302 | 0.171194 | 0.262765 |
| ACER2  | 0.011899 | 0.874742 | 0.913116 |
| ACER3  | -0.00402 | 0.957577 | 0.970933 |
| ACE    | -0.04967 | 0.510262 | 0.616763 |
| ACHE   | 0.147281 | 0.049782 | 0.095627 |
| ACIN1  | -0.00235 | 0.975139 | 0.982893 |
| ACLY   | -0.36987 | 3.75E-07 | 3.72E-06 |
| ACMSD  | -0.05465 | 0.468723 | 0.578799 |
| ACN9   | -0.03795 | 0.614981 | 0.710068 |
| AC01   | -0.08137 | 0.280269 | 0.388722 |
| AC02   | -0.03739 | 0.620262 | 0.714373 |
| ACOT11 | 0.306909 | 3.09E-05 | 0.000173 |
| ACOT12 | -0.24051 | 0.001221 | 0.004081 |
| ACOT13 | -0.18206 | 0.015008 | 0.034861 |
| ACOT1  | -0.03741 | 0.620035 | 0.714153 |
| ACOT2  | -0.11349 | 0.131464 | 0.212469 |

|        |          |          |          |
|--------|----------|----------|----------|
| ACOT4  | 0.416533 | 7.33E-09 | 1.21E-07 |
| ACOT6  | -0.07159 | 0.34229  | 0.454532 |
| ACOT7  | 0.091762 | 0.223147 | 0.325286 |
| ACOT8  | 0.093275 | 0.215574 | 0.316581 |
| ACOT9  | 0.510631 | 3.29E-13 | 1.74E-11 |
| ACOX1  | -0.04479 | 0.552769 | 0.654754 |
| ACOX2  | -0.12796 | 0.088717 | 0.154604 |
| ACOX3  | 0.093966 | 0.212181 | 0.312479 |
| ACOXL  | -0.28653 | 0.000106 | 0.000498 |
| ACP1   | 0.064564 | 0.391877 | 0.50459  |
| ACP2   | -0.0924  | 0.219928 | 0.321661 |
| ACP5   | 0.205006 | 0.00605  | 0.016088 |
| ACP6   | 0.409812 | 1.34E-08 | 2.03E-07 |
| ACPL2  | 0.17864  | 0.017042 | 0.038789 |
| ACPP   | 0.018619 | 0.805159 | 0.862035 |
| ACPT   | 0.03491  | 0.643643 | 0.733863 |
| ACRBP  | -0.30486 | 3.51E-05 | 0.000193 |
| ACRC   | -0.03547 | 0.638314 | 0.729723 |
| ACRV1  | 0.056035 | 0.457534 | 0.568475 |
| ACR    | -0.12747 | 0.089967 | 0.156356 |
| ACSBG1 | 0.004448 | 0.953015 | 0.967994 |
| ACSBG2 | -0.14836 | 0.04812  | 0.093021 |
| ACSF2  | 0.437815 | 9.88E-10 | 2.11E-08 |
| ACSF3  | 0.127455 | 0.089998 | 0.156395 |
| ACSL1  | -0.25543 | 0.000579 | 0.002155 |
| ACSL3  | 0.064905 | 0.389378 | 0.501861 |
| ACSL4  | -0.05825 | 0.439941 | 0.551781 |
| ACSL5  | 0.539673 | 7.66E-15 | 5.80E-13 |
| ACSL6  | -0.46621 | 5.44E-11 | 1.65E-09 |
| ACSM1  | 0.178699 | 0.017006 | 0.038714 |
| ACSM2A | -0.13087 | 0.081644 | 0.144689 |
| ACSM2B | -0.06561 | 0.384203 | 0.496973 |
| ACSM3  | 0.082091 | 0.275997 | 0.383938 |
| ACSM4  | -0.08707 | 0.247807 | 0.353036 |
| ACSM5  | -0.19136 | 0.010503 | 0.02577  |
| ACSS1  | -0.02265 | 0.764151 | 0.831919 |
| ACSS2  | 0.079407 | 0.292058 | 0.401666 |
| ACSS3  | -0.02308 | 0.759795 | 0.828551 |
| ACTA1  | -0.07199 | 0.339601 | 0.451842 |
| ACTA2  | 0.225871 | 0.002433 | 0.007385 |
| ACTBL2 | 0.274563 | 0.000208 | 0.000895 |
| ACTB   | 0.535835 | 1.29E-14 | 9.21E-13 |
| ACTC1  | -0.13344 | 0.075787 | 0.135892 |
| ACTG1  | 0.387633 | 9.01E-08 | 1.07E-06 |
| ACTG2  | 0.167218 | 0.025683 | 0.054861 |
| ACTL6A | 0.293872 | 6.85E-05 | 0.000343 |
| ACTL6B | -0.33863 | 3.78E-06 | 2.78E-05 |
| ACTL7A | -0.06727 | 0.372264 | 0.485308 |
| ACTL7B | -0.02237 | 0.766884 | 0.833894 |
| ACTL8  | 0.085121 | 0.258602 | 0.365032 |
| ACTL9  | 0.054727 | 0.468116 | 0.578188 |
| ACTN1  | 0.197204 | 0.008329 | 0.021137 |
| ACTN2  | 0.015978 | 0.832349 | 0.881138 |
| ACTN3  | -0.01172 | 0.876656 | 0.914582 |

|          |          |          |          |
|----------|----------|----------|----------|
| ACTN4    | 0.406539 | 1.79E-08 | 2.61E-07 |
| ACTR10   | -0.12658 | 0.092244 | 0.159653 |
| ACTR1A   | 0.020851 | 0.78235  | 0.845433 |
| ACTR1B   | 0.148153 | 0.048429 | 0.093464 |
| ACTR2    | 0.095208 | 0.206176 | 0.305327 |
| ACTR3B   | -0.38213 | 1.41E-07 | 1.58E-06 |
| ACTR3C   | -0.11194 | 0.136853 | 0.219564 |
| ACTR3    | 0.277526 | 0.000176 | 0.000777 |
| ACTR5    | 0.10372  | 0.168275 | 0.259351 |
| ACTR6    | -0.34586 | 2.26E-06 | 1.77E-05 |
| ACTR8    | -0.14461 | 0.054127 | 0.102618 |
| ACTRT1   | 0.111064 | 0.139968 | 0.223471 |
| ACTRT2   | -0.01497 | 0.842777 | 0.888946 |
| ACVR1B   | -0.08831 | 0.241116 | 0.345474 |
| ACVR1C   | -0.26559 | 0.00034  | 0.001363 |
| ACVR1    | 0.244699 | 0.000995 | 0.003423 |
| ACVR2A   | 0.03776  | 0.616789 | 0.711382 |
| ACVR2B   | -0.45186 | 2.43E-10 | 6.15E-09 |
| ACVRL1   | -0.09774 | 0.194319 | 0.290898 |
| ACY1     | 0.59443  | 2.18E-18 | 4.36E-16 |
| ACY3     | 0.259143 | 0.000478 | 0.001828 |
| ACYP1    | 0.176911 | 0.018161 | 0.040902 |
| ACYP2    | -0.22127 | 0.002995 | 0.00884  |
| ADAD2    | -0.04789 | 0.525544 | 0.630898 |
| ADAL     | -0.2218  | 0.002925 | 0.008655 |
| ADAM10   | 0.165585 | 0.027183 | 0.05758  |
| ADAM11   | -0.07361 | 0.328816 | 0.440754 |
| ADAM12   | 0.104483 | 0.165149 | 0.255313 |
| ADAM15   | 0.484784 | 7.03E-12 | 2.62E-10 |
| ADAM17   | 0.095363 | 0.205432 | 0.304536 |
| ADAM18   | 0.074824 | 0.320887 | 0.432737 |
| ADAM19   | 0.134892 | 0.072618 | 0.131161 |
| ADAM20   | 0.072441 | 0.336581 | 0.448854 |
| ADAM21P1 | 0.092414 | 0.21986  | 0.321586 |
| ADAM21   | 0.028226 | 0.708402 | 0.787626 |
| ADAM22   | -0.13121 | 0.080846 | 0.143467 |
| ADAM23   | -0.18968 | 0.011217 | 0.027261 |
| ADAM28   | 0.414159 | 9.09E-09 | 1.46E-07 |
| ADAM29   | -0.18717 | 0.012359 | 0.029595 |
| ADAM2    | -0.15954 | 0.033402 | 0.068566 |
| ADAM30   | -0.0179  | 0.812522 | 0.867305 |
| ADAM32   | 0.17712  | 0.018022 | 0.040654 |
| ADAM33   | 0.073905 | 0.326881 | 0.438935 |
| ADAM5P   | 0.084469 | 0.262276 | 0.369207 |
| ADAM6    | 0.137651 | 0.066909 | 0.122482 |
| ADAM7    | 0.029205 | 0.698775 | 0.779861 |
| ADAM8    | 0.550802 | 1.64E-15 | 1.41E-13 |
| ADAM9    | 0.359075 | 8.56E-07 | 7.58E-06 |
| ADAMDEC1 | -0.06221 | 0.409415 | 0.5215   |
| ADAMTS10 | 0.160638 | 0.032193 | 0.06645  |
| ADAMTS12 | 0.105154 | 0.162437 | 0.251963 |
| ADAMTS13 | -0.01767 | 0.814932 | 0.869079 |
| ADAMTS14 | 0.338549 | 3.80E-06 | 2.79E-05 |
| ADAMTS15 | 0.02962  | 0.694703 | 0.776456 |

|           |          |          |          |
|-----------|----------|----------|----------|
| ADAMTS16  | -0.14582 | 0.052123 | 0.099404 |
| ADAMTS17  | -0.00115 | 0.987889 | 0.991388 |
| ADAMTS18  | -0.27216 | 0.000238 | 0.001004 |
| ADAMTS19  | -0.18469 | 0.013589 | 0.032085 |
| ADAMTS1   | -0.16082 | 0.031994 | 0.066087 |
| ADAMTS20  | 0.072692 | 0.334906 | 0.447099 |
| ADAMTS2   | -0.09795 | 0.193344 | 0.289714 |
| ADAMTS3   | -0.11674 | 0.12071  | 0.198259 |
| ADAMTS4   | 0.015019 | 0.842285 | 0.888617 |
| ADAMTS5   | -0.08919 | 0.236438 | 0.34037  |
| ADAMTS6   | 0.224575 | 0.002581 | 0.007768 |
| ADAMTS7   | 0.279523 | 0.000158 | 0.000707 |
| ADAMTS8   | 0.026809 | 0.722419 | 0.798364 |
| ADAMTS9   | 0.032168 | 0.66992  | 0.757094 |
| ADAMTSL1  | -0.08235 | 0.274473 | 0.382508 |
| ADAMTSL2  | -0.03192 | 0.672359 | 0.758818 |
| ADAMTSL3  | -0.28572 | 0.000111 | 0.00052  |
| ADAMTSL4  | 0.448053 | 3.58E-10 | 8.68E-09 |
| ADAMTSL5  | 0.663028 | 6.63E-24 | 5.96E-21 |
| ADAP1     | 0.42598  | 3.06E-09 | 5.65E-08 |
| ADAP2     | -0.07393 | 0.32673  | 0.438791 |
| ADARB1    | -0.20358 | 0.006419 | 0.01694  |
| ADARB2    | -0.20054 | 0.007274 | 0.018827 |
| ADAR      | -0.02974 | 0.693499 | 0.775461 |
| ADAT1     | -0.12442 | 0.097995 | 0.167859 |
| ADAT2     | 0.073901 | 0.32691  | 0.438944 |
| ADAT3     | 0.15426  | 0.039792 | 0.079349 |
| ADA       | 0.359492 | 8.30E-07 | 7.39E-06 |
| ADCK1     | -0.16082 | 0.03199  | 0.066086 |
| ADCK2     | -0.09308 | 0.216537 | 0.317783 |
| ADCK4     | 0.091012 | 0.226968 | 0.329544 |
| ADCK5     | 0.296281 | 5.93E-05 | 0.000303 |
| ADCY10    | -0.13345 | 0.075764 | 0.135862 |
| ADCY1     | -0.45047 | 2.80E-10 | 7.02E-09 |
| ADCY2     | -0.22276 | 0.002802 | 0.008335 |
| ADCY3     | -0.02403 | 0.750167 | 0.820636 |
| ADCY4     | -0.04664 | 0.536423 | 0.639954 |
| ADCY5     | -0.00994 | 0.895181 | 0.926819 |
| ADCY6     | -0.10853 | 0.149286 | 0.235443 |
| ADCY7     | 0.206153 | 0.005767 | 0.015458 |
| ADCY8     | -0.24674 | 0.000899 | 0.003138 |
| ADCY9     | -0.32076 | 1.27E-05 | 7.99E-05 |
| ADCYAP1R1 | -0.29456 | 6.58E-05 | 0.000331 |
| ADCYAP1   | -0.11655 | 0.121305 | 0.198891 |
| ADC       | -0.00208 | 0.978069 | 0.984993 |
| ADD1      | -0.21413 | 0.004104 | 0.011578 |
| ADD2      | -0.20221 | 0.006793 | 0.017796 |
| ADD3      | 0.177271 | 0.017923 | 0.040486 |
| ADH1A     | -0.25649 | 0.000549 | 0.002059 |
| ADH1B     | -0.15776 | 0.035451 | 0.072076 |
| ADH1C     | 0.292544 | 7.41E-05 | 0.000366 |
| ADH4      | -0.0854  | 0.25705  | 0.363453 |
| ADH5      | -0.01664 | 0.825538 | 0.876446 |
| ADH6      | -0.10668 | 0.15641  | 0.244591 |

|         |          |          |          |
|---------|----------|----------|----------|
| ADH7    | 0.10955  | 0.145485 | 0.230533 |
| ADHFE1  | -0.04277 | 0.570822 | 0.670754 |
| ADI1    | 0.263292 | 0.000384 | 0.001516 |
| ADIG    | 0.004619 | 0.95121  | 0.96696  |
| ADIPOQ  | -0.21594 | 0.003792 | 0.010808 |
| ADIPOR1 | 0.161426 | 0.031346 | 0.064959 |
| ADIPOR2 | -0.16433 | 0.028388 | 0.059743 |
| ADK     | 0.124278 | 0.098369 | 0.168282 |
| ADM2    | 0.33861  | 3.78E-06 | 2.78E-05 |
| ADM     | 0.263321 | 0.000383 | 0.001514 |
| ADNP2   | -0.38385 | 1.23E-07 | 1.40E-06 |
| ADNP    | -0.31342 | 2.04E-05 | 0.000121 |
| ADORA1  | 0.117359 | 0.118728 | 0.195808 |
| ADORA2A | -0.28829 | 9.53E-05 | 0.000455 |
| ADORA2B | 0.419316 | 5.69E-09 | 9.69E-08 |
| ADORA3  | 0.003842 | 0.959407 | 0.97219  |
| ADO     | 0.078382 | 0.298348 | 0.408328 |
| ADPGK   | 0.146442 | 0.051112 | 0.097792 |
| ADPRHL1 | 0.134247 | 0.074009 | 0.133236 |
| ADPRHL2 | 0.282737 | 0.000131 | 0.000603 |
| ADPRH   | -0.13044 | 0.082651 | 0.14608  |
| ADRA1A  | -0.24096 | 0.001195 | 0.004005 |
| ADRA1B  | -0.05031 | 0.504805 | 0.611745 |
| ADRA1D  | -0.04653 | 0.5374   | 0.64081  |
| ADRA2A  | 0.289231 | 9.02E-05 | 0.000434 |
| ADRA2B  | 0.094152 | 0.211273 | 0.311491 |
| ADRA2C  | -0.06049 | 0.422477 | 0.534694 |
| ADRB1   | -0.37117 | 3.39E-07 | 3.40E-06 |
| ADRB2   | -0.17335 | 0.020667 | 0.045653 |
| ADRB3   | 0.052006 | 0.490557 | 0.599116 |
| ADRBK1  | 0.239089 | 0.001308 | 0.004328 |
| ADRBK2  | -0.21211 | 0.004477 | 0.012445 |
| ADRM1   | 0.221471 | 0.002969 | 0.00877  |
| ADSL    | -0.02356 | 0.754915 | 0.824461 |
| ADSSL1  | -0.17532 | 0.019245 | 0.042991 |
| ADSS    | 0.380113 | 1.66E-07 | 1.83E-06 |
| AEBP1   | 0.2794   | 0.000159 | 0.000711 |
| AEBP2   | -0.05683 | 0.451134 | 0.561935 |
| AEN     | -0.24799 | 0.000845 | 0.002974 |
| AES     | 0.0773   | 0.305089 | 0.415484 |
| AFAP1L1 | -0.04871 | 0.518514 | 0.624352 |
| AFAP1L2 | 0.541446 | 6.02E-15 | 4.65E-13 |
| AFAP1   | 0.173565 | 0.020506 | 0.045367 |
| AFARP1  | 0.139878 | 0.062572 | 0.11569  |
| AFF1    | -0.24898 | 0.000804 | 0.002861 |
| AFF2    | -0.12839 | 0.087659 | 0.153165 |
| AFF3    | -0.21726 | 0.003578 | 0.010266 |
| AFF4    | -0.20172 | 0.006931 | 0.018097 |
| AFG3L1  | 0.073006 | 0.332818 | 0.445063 |
| AFG3L2  | -0.00496 | 0.947559 | 0.964534 |
| AFMID   | 0.274224 | 0.000212 | 0.000909 |
| AFM     | -0.29681 | 5.75E-05 | 0.000295 |
| AFP     | -0.05551 | 0.461739 | 0.571997 |
| AFTPH   | -0.07079 | 0.34774  | 0.460208 |



|         |          |          |          |
|---------|----------|----------|----------|
| AG2     | 0.044862 | 0.552097 | 0.654193 |
| AGAP11  | 0.171412 | 0.022151 | 0.048351 |
| AGAP1   | -0.14797 | 0.048705 | 0.093905 |
| AGAP2   | -0.00797 | 0.915927 | 0.941552 |
| AGAP3   | -0.06266 | 0.406047 | 0.51843  |
| AGAP4   | 0.154216 | 0.039849 | 0.079425 |
| AGAP5   | 0.085987 | 0.253772 | 0.359925 |
| AGAP6   | 0.077135 | 0.306127 | 0.416411 |
| AGAP7   | 0.011    | 0.884138 | 0.919574 |
| AGAP8   | 0.125536 | 0.094984 | 0.163507 |
| AGA     | -0.17923 | 0.016676 | 0.038122 |
| AGBL1   | 0.117703 | 0.117644 | 0.194311 |
| AGBL2   | 0.213455 | 0.004225 | 0.011855 |
| AGBL3   | -0.18303 | 0.01447  | 0.033817 |
| AGBL4   | -0.44519 | 4.77E-10 | 1.12E-08 |
| AGBL5   | 0.02294  | 0.761171 | 0.829636 |
| AGER    | 0.077273 | 0.30526  | 0.415493 |
| AGFG1   | 0.194341 | 0.009339 | 0.023287 |
| AGFG2   | 0.003071 | 0.967549 | 0.977934 |
| AGGF1   | -0.24588 | 0.000939 | 0.003251 |
| AGK     | -0.02653 | 0.72522  | 0.800922 |
| AGL     | -0.08511 | 0.258647 | 0.365059 |
| AGMAT   | 0.169857 | 0.023408 | 0.050744 |
| AGPAT1  | -0.04649 | 0.537778 | 0.641105 |
| AGPAT2  | 0.309637 | 2.60E-05 | 0.000149 |
| AGPAT3  | 0.004868 | 0.94858  | 0.965182 |
| AGPAT4  | 0.002322 | 0.975462 | 0.983119 |
| AGPAT5  | -0.1375  | 0.067216 | 0.122942 |
| AGPAT6  | -0.03962 | 0.599496 | 0.696173 |
| AGPAT9  | -0.04648 | 0.537841 | 0.641142 |
| AGPHD1  | -0.0107  | 0.887236 | 0.921487 |
| AGPS    | 0.155879 | 0.037732 | 0.075887 |
| AGR2    | 0.378979 | 1.82E-07 | 1.98E-06 |
| AGR3    | 0.409327 | 1.40E-08 | 2.10E-07 |
| AGRN    | 0.467373 | 4.80E-11 | 1.48E-09 |
| AGRP    | 0.321138 | 1.24E-05 | 7.83E-05 |
| AGTPBP1 | -0.43555 | 1.23E-09 | 2.52E-08 |
| AGTR1   | -0.24896 | 0.000805 | 0.002862 |
| AGTR2   | -0.23531 | 0.001568 | 0.005062 |
| AGTRAP  | 0.382053 | 1.42E-07 | 1.59E-06 |
| AGT     | -0.16898 | 0.024147 | 0.052059 |
| AGXT2L1 | 0.135448 | 0.071438 | 0.129467 |
| AGXT2L2 | 0.213147 | 0.004282 | 0.011983 |
| AGXT2   | -0.06193 | 0.411507 | 0.523592 |
| AGXT    | -0.01451 | 0.847509 | 0.892746 |
| AHCTF1  | -0.09726 | 0.196524 | 0.293509 |
| AHCYL1  | -0.20617 | 0.005763 | 0.015452 |
| AHCYL2  | 0.188366 | 0.011803 | 0.028441 |
| AHCY    | -0.01865 | 0.804838 | 0.86194  |
| AHDC1   | 0.11052  | 0.141931 | 0.226007 |
| AHI1    | -0.4632  | 7.49E-11 | 2.18E-09 |
| AHNAK2  | 0.564888 | 2.15E-16 | 2.40E-14 |
| AHNAK   | 0.26485  | 0.000353 | 0.001415 |
| AHRR    | 0.047052 | 0.532842 | 0.636903 |

|         |          |          |          |
|---------|----------|----------|----------|
| AHR     | 0.345373 | 2.34E-06 | 1.82E-05 |
| AHSA1   | 0.085591 | 0.255969 | 0.362418 |
| AHSA2   | 0.265774 | 0.000336 | 0.001352 |
| AHSG    | 0.322691 | 1.12E-05 | 7.17E-05 |
| AHSP    | -0.02071 | 0.783742 | 0.846638 |
| AICDA   | -0.00091 | 0.990375 | 0.992914 |
| AIDA    | 0.285117 | 0.000115 | 0.000535 |
| AIF1L   | -0.19059 | 0.010824 | 0.026433 |
| AIF1    | 0.096676 | 0.199233 | 0.296905 |
| AIFM1   | -0.28705 | 0.000102 | 0.000486 |
| AIFM2   | 0.254821 | 0.000598 | 0.002211 |
| AIFM3   | 0.019892 | 0.792125 | 0.852845 |
| AIG1    | -0.10904 | 0.147381 | 0.23294  |
| AIM1L   | 0.70427  | 5.53E-28 | 1.21E-24 |
| AIM1    | 0.240982 | 0.001194 | 0.004002 |
| AIM2    | 0.051021 | 0.498816 | 0.606169 |
| AIMP1   | 0.134255 | 0.073993 | 0.13323  |
| AIMP2   | 0.289258 | 9.00E-05 | 0.000434 |
| AIPL1   | 0.157101 | 0.036238 | 0.073397 |
| AIP     | 0.327603 | 8.05E-06 | 5.37E-05 |
| AIRE    | 0.019872 | 0.792327 | 0.852977 |
| AJAP1   | -0.11091 | 0.140519 | 0.224209 |
| AK1     | 0.086267 | 0.25222  | 0.35811  |
| AK2     | 0.283412 | 0.000126 | 0.000583 |
| AK3L1   | 0.388582 | 8.32E-08 | 9.95E-07 |
| AK3     | -0.21574 | 0.003826 | 0.010898 |
| AK5     | -0.11678 | 0.120563 | 0.198123 |
| AK7     | -0.06673 | 0.376121 | 0.489047 |
| AKAP10  | -0.2219  | 0.002913 | 0.008625 |
| AKAP11  | -0.23125 | 0.001898 | 0.005963 |
| AKAP12  | -0.07818 | 0.299628 | 0.40974  |
| AKAP13  | 0.024264 | 0.747839 | 0.818814 |
| AKAP14  | 0.034918 | 0.643561 | 0.733854 |
| AKAP1   | 0.177304 | 0.017901 | 0.040446 |
| AKAP2   | -0.18731 | 0.012293 | 0.029446 |
| AKAP3   | -0.31849 | 1.47E-05 | 9.10E-05 |
| AKAP4   | -0.02026 | 0.788354 | 0.849996 |
| AKAP5   | 0.050483 | 0.503365 | 0.610497 |
| AKAP6   | -0.38142 | 1.50E-07 | 1.67E-06 |
| AKAP7   | -0.05073 | 0.501291 | 0.608392 |
| AKAP8L  | 0.056067 | 0.457273 | 0.5683   |
| AKAP8   | 0.258724 | 0.000488 | 0.001864 |
| AKAP9   | -0.37084 | 3.48E-07 | 3.48E-06 |
| AKD1    | -0.41338 | 9.76E-09 | 1.55E-07 |
| AKIRIN1 | -0.35829 | 9.09E-07 | 7.97E-06 |
| AKIRIN2 | -0.19762 | 0.00819  | 0.020847 |
| AKNAD1  | -0.00673 | 0.928996 | 0.950941 |
| AKNA    | -0.20243 | 0.006733 | 0.017666 |
| AKR1A1  | 0.153338 | 0.041005 | 0.081394 |
| AKR1B10 | 0.475638 | 1.95E-11 | 6.51E-10 |
| AKR1B15 | 0.281867 | 0.000138 | 0.00063  |
| AKR1B1  | -0.14853 | 0.047852 | 0.092612 |
| AKR1C1  | 0.154364 | 0.039656 | 0.079156 |
| AKR1C2  | 0.35997  | 8.01E-07 | 7.17E-06 |

|          |          |          |          |
|----------|----------|----------|----------|
| AKR1C3   | 0.442641 | 6.15E-10 | 1.40E-08 |
| AKR1C4   | -0.16617 | 0.026633 | 0.056635 |
| AKR1CL1  | -0.01039 | 0.890561 | 0.923847 |
| AKR1D1   | -0.01864 | 0.80492  | 0.861982 |
| AKR1E2   | 0.151337 | 0.043748 | 0.086017 |
| AKR7A2   | -0.08075 | 0.283918 | 0.392793 |
| AKR7A3   | 0.204342 | 0.006219 | 0.016487 |
| AKR7L    | 0.171068 | 0.022424 | 0.048866 |
| AKT1S1   | 0.030054 | 0.69046  | 0.773506 |
| AKT1     | 0.114608 | 0.127679 | 0.207421 |
| AKT2     | 0.13853  | 0.065168 | 0.11975  |
| AKT3     | -0.28997 | 8.63E-05 | 0.000418 |
| AKTIP    | -0.1722  | 0.021539 | 0.047201 |
| ALAD     | 0.020788 | 0.782996 | 0.845971 |
| ALAS1    | 0.340273 | 3.36E-06 | 2.52E-05 |
| ALAS2    | -0.11428 | 0.128789 | 0.208949 |
| ALB      | -0.05296 | 0.48264  | 0.591867 |
| ALCAM    | 0.106332 | 0.157757 | 0.246152 |
| ALDH16A1 | 0.140866 | 0.060722 | 0.112723 |
| ALDH18A1 | -0.00533 | 0.94366  | 0.961999 |
| ALDH1A1  | -0.17914 | 0.016729 | 0.038203 |
| ALDH1A2  | 0.048026 | 0.524386 | 0.629734 |
| ALDH1A3  | 0.202607 | 0.006683 | 0.017546 |
| ALDH1B1  | 0.016267 | 0.829368 | 0.879305 |
| ALDH1L1  | 0.255438 | 0.000579 | 0.002155 |
| ALDH1L2  | -0.18448 | 0.013695 | 0.032277 |
| ALDH2    | 0.213165 | 0.004279 | 0.011978 |
| ALDH3A1  | 0.481418 | 1.03E-11 | 3.67E-10 |
| ALDH3A2  | -0.10927 | 0.146527 | 0.231887 |
| ALDH3B1  | 0.710577 | 1.14E-28 | 3.75E-25 |
| ALDH3B2  | 0.291485 | 7.90E-05 | 0.000387 |
| ALDH4A1  | -0.06965 | 0.355546 | 0.46861  |
| ALDH5A1  | -0.35577 | 1.10E-06 | 9.42E-06 |
| ALDH6A1  | -0.32833 | 7.67E-06 | 5.16E-05 |
| ALDH7A1  | 0.232757 | 0.001769 | 0.005617 |
| ALDH8A1  | -0.05743 | 0.446372 | 0.557691 |
| ALDH9A1  | -0.36932 | 3.91E-07 | 3.85E-06 |
| ALDOA    | 0.43062  | 1.98E-09 | 3.82E-08 |
| ALDOB    | 0.074098 | 0.325619 | 0.437686 |
| ALDOC    | 0.22424  | 0.00262  | 0.007867 |
| ALG10B   | -0.04097 | 0.587138 | 0.685648 |
| ALG10    | 0.011721 | 0.876598 | 0.914571 |
| ALG11    | 0.164182 | 0.028531 | 0.059987 |
| ALG12    | -0.07035 | 0.350729 | 0.463405 |
| ALG13    | -0.13356 | 0.07552  | 0.135548 |
| ALG14    | -0.12871 | 0.086844 | 0.15205  |
| ALG1L2   | 0.246158 | 0.000926 | 0.003213 |
| ALG1L    | 0.296836 | 5.74E-05 | 0.000294 |
| ALG1     | 0.009057 | 0.904495 | 0.933383 |
| ALG2     | -0.38538 | 1.08E-07 | 1.25E-06 |
| ALG3     | 0.312323 | 2.19E-05 | 0.000128 |
| ALG5     | 0.079698 | 0.290283 | 0.399726 |
| ALG6     | 0.01445  | 0.848179 | 0.89324  |
| ALG8     | 0.253013 | 0.000656 | 0.002387 |

|          |          |          |          |
|----------|----------|----------|----------|
| ALG9     | -0.21776 | 0.003502 | 0.010076 |
| ALKBH1   | -0.2643  | 0.000364 | 0.001449 |
| ALKBH2   | 0.233472 | 0.00171  | 0.005458 |
| ALKBH3   | 0.103481 | 0.169265 | 0.260491 |
| ALKBH4   | -0.10122 | 0.178809 | 0.271836 |
| ALKBH5   | -0.48953 | 4.08E-12 | 1.62E-10 |
| ALKBH6   | 0.250646 | 0.000739 | 0.002657 |
| ALKBH7   | 0.06892  | 0.360652 | 0.473793 |
| ALKBH8   | -0.01759 | 0.815731 | 0.869573 |
| ALK      | -0.39465 | 5.01E-08 | 6.40E-07 |
| ALLC     | -0.14222 | 0.058254 | 0.108918 |
| ALMS1P   | -0.24354 | 0.001054 | 0.00359  |
| ALMS1    | -0.23497 | 0.001593 | 0.005136 |
| ALOX12B  | -0.07765 | 0.302904 | 0.413191 |
| ALOX12P2 | 0.275053 | 0.000203 | 0.000875 |
| ALOX12   | -0.09084 | 0.227863 | 0.330626 |
| ALOX15B  | 0.155533 | 0.038165 | 0.076602 |
| ALOX15   | -0.27275 | 0.00023  | 0.000975 |
| ALOX5AP  | 0.204067 | 0.006291 | 0.016651 |
| ALOX5    | 0.386409 | 9.96E-08 | 1.16E-06 |
| ALOXE3   | 0.200946 | 0.007155 | 0.018542 |
| ALPI     | 0.040737 | 0.589266 | 0.68724  |
| ALPK1    | 0.383899 | 1.22E-07 | 1.39E-06 |
| ALPK2    | 0.186835 | 0.012519 | 0.029934 |
| ALPK3    | -0.15332 | 0.041033 | 0.08144  |
| ALPL     | -0.24964 | 0.000778 | 0.002779 |
| ALPPL2   | 0.310866 | 2.41E-05 | 0.000139 |
| ALPP     | 0.386878 | 9.58E-08 | 1.12E-06 |
| ALS2CL   | 0.66368  | 5.78E-24 | 5.44E-21 |
| ALS2CR11 | -0.15969 | 0.03324  | 0.068325 |
| ALS2CR12 | -0.06607 | 0.380881 | 0.493612 |
| ALS2CR4  | -0.25971 | 0.000464 | 0.001779 |
| ALS2CR8  | -0.12962 | 0.084634 | 0.148866 |
| ALS2     | -0.12979 | 0.084229 | 0.148272 |
| ALX1     | -0.00748 | 0.921062 | 0.945348 |
| ALX3     | -0.22361 | 0.002696 | 0.008064 |
| ALX4     | -0.03745 | 0.619715 | 0.713911 |
| AMAC1L2  | 0.059901 | 0.427046 | 0.539165 |
| AMAC1L3  | -0.08361 | 0.267153 | 0.374791 |
| AMAC1    | -0.04742 | 0.529625 | 0.634101 |
| AMACR    | -0.35316 | 1.33E-06 | 1.11E-05 |
| AMBN     | -0.17157 | 0.022026 | 0.048132 |
| AMBP     | 0.012141 | 0.87222  | 0.911637 |
| AMBRA1   | 0.243379 | 0.001062 | 0.003616 |
| AMD1     | -0.29231 | 7.52E-05 | 0.000371 |
| AMDHD1   | -0.26878 | 0.000286 | 0.001179 |
| AMDHD2   | 0.229834 | 0.002027 | 0.006307 |
| AMELX    | 0.119977 | 0.110672 | 0.185444 |
| AMELY    | -0.02814 | 0.709233 | 0.788152 |
| AMFR     | 0.189001 | 0.011516 | 0.027859 |
| AMHR2    | -0.15691 | 0.036467 | 0.073785 |
| AMH      | -0.04486 | 0.552144 | 0.654209 |
| AMICA1   | 0.121119 | 0.107294 | 0.180887 |
| AMIGO1   | -0.36963 | 3.82E-07 | 3.77E-06 |

|           |          |          |          |
|-----------|----------|----------|----------|
| AMIG02    | 0.328784 | 7.44E-06 | 5.02E-05 |
| AMIG03    | -0.24891 | 0.000807 | 0.002867 |
| AMMECR1L  | 0.133727 | 0.075145 | 0.134986 |
| AMMECR1   | 0.078689 | 0.296457 | 0.406333 |
| AMN1      | -0.16718 | 0.025713 | 0.054921 |
| AMN       | 0.463708 | 7.10E-11 | 2.08E-09 |
| AMOTL1    | -0.14578 | 0.052182 | 0.099503 |
| AMOTL2    | 0.193895 | 0.009506 | 0.023643 |
| AMOT      | -0.17265 | 0.021189 | 0.046602 |
| AMPD1     | -0.03875 | 0.607602 | 0.703314 |
| AMPD2     | -0.07511 | 0.319064 | 0.430778 |
| AMPD3     | -0.11129 | 0.139174 | 0.222458 |
| AMPH      | -0.30384 | 3.74E-05 | 0.000204 |
| AMTN      | 0.000509 | 0.994622 | 0.996386 |
| AMT       | 0.138359 | 0.065504 | 0.120289 |
| AMY1A     | -0.14118 | 0.06015  | 0.111825 |
| AMY2A     | -0.09546 | 0.204978 | 0.303932 |
| AMY2B     | -0.12182 | 0.105265 | 0.178103 |
| AMZ1      | 0.016261 | 0.829429 | 0.879322 |
| AMZ2P1    | -0.25683 | 0.000539 | 0.002028 |
| AMZ2      | -0.32175 | 1.19E-05 | 7.56E-05 |
| ANAPC10   | -0.06201 | 0.410925 | 0.523019 |
| ANAPC11   | 0.187389 | 0.012256 | 0.029375 |
| ANAPC13   | -0.095   | 0.207154 | 0.306469 |
| ANAPC16   | -0.12151 | 0.106168 | 0.179326 |
| ANAPC1    | -0.0955  | 0.204792 | 0.303724 |
| ANAPC2    | -0.14312 | 0.056667 | 0.106514 |
| ANAPC4    | 0.070718 | 0.348235 | 0.460663 |
| ANAPC5    | -0.32404 | 1.02E-05 | 6.62E-05 |
| ANAPC7    | -0.04987 | 0.508541 | 0.615153 |
| ANGEL1    | -0.56768 | 1.42E-16 | 1.68E-14 |
| ANGEL2    | -0.11929 | 0.112752 | 0.188069 |
| ANGPT1    | -0.16358 | 0.029129 | 0.061102 |
| ANGPT2    | 0.05879  | 0.435682 | 0.547195 |
| ANGPT4    | 0.050734 | 0.501236 | 0.608362 |
| ANGPTL1   | -0.13306 | 0.07662  | 0.137161 |
| ANGPTL2   | 0.113123 | 0.132724 | 0.214069 |
| ANGPTL3   | -0.30779 | 2.92E-05 | 0.000165 |
| ANGPTL4   | 0.300265 | 4.66E-05 | 0.000247 |
| ANGPTL5   | -0.3627  | 6.51E-07 | 6.00E-06 |
| ANGPTL6   | -0.04464 | 0.554051 | 0.655761 |
| ANGPTL7   | -0.05633 | 0.455152 | 0.56612  |
| ANG       | 0.117354 | 0.118746 | 0.19582  |
| ANK1      | 0.190816 | 0.01073  | 0.026234 |
| ANK2      | -0.40115 | 2.87E-08 | 3.91E-07 |
| ANK3      | -0.16466 | 0.028068 | 0.059183 |
| ANKAR     | 0.013435 | 0.858728 | 0.90173  |
| ANKDD1A   | -0.007   | 0.926094 | 0.948806 |
| ANKFN1    | 0.476722 | 1.73E-11 | 5.86E-10 |
| ANKFY1    | -0.43655 | 1.12E-09 | 2.32E-08 |
| ANKHD1-EI | -0.25039 | 0.000749 | 0.002687 |
| ANKHD1    | -0.17249 | 0.021317 | 0.046836 |
| ANKH      | -0.40427 | 2.19E-08 | 3.10E-07 |
| ANKIB1    | -0.05688 | 0.450779 | 0.561634 |

|           |          |          |          |
|-----------|----------|----------|----------|
| ANKK1     | 0.112388 | 0.135278 | 0.217513 |
| ANKLE1    | -0.11946 | 0.112238 | 0.187497 |
| ANKLE2    | 0.130067 | 0.083551 | 0.147315 |
| ANKMY1    | 0.392523 | 5.99E-08 | 7.44E-07 |
| ANKMY2    | 0.109291 | 0.146445 | 0.231813 |
| ANKRA2    | -0.14766 | 0.049188 | 0.094725 |
| ANKRD10   | 0.480352 | 1.16E-11 | 4.08E-10 |
| ANKRD11   | -0.09602 | 0.202309 | 0.300741 |
| ANKRD12   | -0.23078 | 0.00194  | 0.006075 |
| ANKRD13A  | -0.23014 | 0.001998 | 0.006227 |
| ANKRD13B  | 0.066361 | 0.378803 | 0.491437 |
| ANKRD13C  | -0.25348 | 0.00064  | 0.002342 |
| ANKRD13D  | 0.298084 | 5.32E-05 | 0.000276 |
| ANKRD16   | -0.12285 | 0.102315 | 0.173916 |
| ANKRD17   | -0.31926 | 1.40E-05 | 8.71E-05 |
| ANKRD19   | 0.079658 | 0.290531 | 0.399983 |
| ANKRD1    | 0.204844 | 0.006091 | 0.01618  |
| ANKRD20A3 | -0.03936 | 0.601972 | 0.698269 |
| ANKRD20A4 | -0.04024 | 0.593855 | 0.691205 |
| ANKRD20B  | 0.031227 | 0.679028 | 0.763945 |
| ANKRD22   | 0.448541 | 3.41E-10 | 8.35E-09 |
| ANKRD23   | -0.05377 | 0.475909 | 0.585629 |
| ANKRD24   | 0.088988 | 0.237513 | 0.341421 |
| ANKRD26P1 | -0.26299 | 0.00039  | 0.001537 |
| ANKRD26   | -0.28374 | 0.000124 | 0.000573 |
| ANKRD27   | 0.152074 | 0.04272  | 0.084281 |
| ANKRD28   | -0.00503 | 0.94683  | 0.964133 |
| ANKRD29   | -0.10275 | 0.172328 | 0.264144 |
| ANKRD2    | 0.224482 | 0.002592 | 0.007794 |
| ANKRD30A  | -0.02413 | 0.749235 | 0.819842 |
| ANKRD30B  | -0.15322 | 0.041169 | 0.081677 |
| ANKRD31   | -0.10534 | 0.161689 | 0.25102  |
| ANKRD32   | -0.28123 | 0.000143 | 0.00065  |
| ANKRD33   | 0.170282 | 0.023058 | 0.050061 |
| ANKRD34A  | 0.19251  | 0.01004  | 0.024783 |
| ANKRD34B  | 0.04321  | 0.56685  | 0.66694  |
| ANKRD34C  | -0.2128  | 0.004346 | 0.012136 |
| ANKRD35   | 0.313802 | 2.00E-05 | 0.000118 |
| ANKRD36BF | -0.19684 | 0.008452 | 0.021401 |
| ANKRD36B  | 0.065665 | 0.38384  | 0.496764 |
| ANKRD36   | 0.21951  | 0.00324  | 0.009429 |
| ANKRD37   | 0.108603 | 0.149018 | 0.235077 |
| ANKRD39   | 0.047694 | 0.527262 | 0.632359 |
| ANKRD40   | -0.02002 | 0.790818 | 0.852002 |
| ANKRD42   | 0.104407 | 0.165459 | 0.255648 |
| ANKRD43   | -0.22252 | 0.002832 | 0.008413 |
| ANKRD44   | -0.24773 | 0.000856 | 0.003008 |
| ANKRD45   | -0.11822 | 0.116017 | 0.192207 |
| ANKRD46   | -0.49559 | 2.02E-12 | 8.75E-11 |
| ANKRD49   | 0.025462 | 0.735842 | 0.809083 |
| ANKRD50   | 0.168704 | 0.02438  | 0.052509 |
| ANKRD52   | -0.44201 | 6.54E-10 | 1.47E-08 |
| ANKRD53   | -0.23753 | 0.001411 | 0.004621 |
| ANKRD54   | -0.19687 | 0.00844  | 0.021378 |

|         |          |          |          |
|---------|----------|----------|----------|
| ANKRD55 | -0.03002 | 0.69082  | 0.77368  |
| ANKRD56 | 0.152824 | 0.041696 | 0.08254  |
| ANKRD57 | 0.242519 | 0.001108 | 0.003748 |
| ANKRD58 | 0.10804  | 0.15115  | 0.237795 |
| ANKRD5  | -0.29428 | 6.69E-05 | 0.000336 |
| ANKRD6  | -0.00938 | 0.901125 | 0.931029 |
| ANKRD7  | -0.44389 | 5.43E-10 | 1.26E-08 |
| ANKRD9  | 0.31525  | 1.82E-05 | 0.000109 |
| ANKS1A  | -0.15143 | 0.043613 | 0.085785 |
| ANKS1B  | -0.3384  | 3.84E-06 | 2.82E-05 |
| ANKS3   | 0.266525 | 0.000323 | 0.001308 |
| ANKS4B  | 0.050005 | 0.507416 | 0.614167 |
| ANKS6   | 0.203926 | 0.006328 | 0.016735 |
| ANKZF1  | 0.19647  | 0.008578 | 0.021662 |
| ANLN    | 0.395425 | 4.69E-08 | 6.03E-07 |
| ANO10   | 0.105309 | 0.161815 | 0.251157 |
| ANO1    | 0.618473 | 3.62E-20 | 1.08E-17 |
| ANO2    | -0.13737 | 0.067474 | 0.123346 |
| ANO3    | -0.32446 | 9.94E-06 | 6.46E-05 |
| ANO4    | 0.11769  | 0.117685 | 0.194352 |
| ANO5    | -0.16659 | 0.026248 | 0.055918 |
| ANO6    | 0.162782 | 0.029933 | 0.062555 |
| ANO7    | 0.279644 | 0.000157 | 0.000703 |
| ANO8    | 0.298378 | 5.22E-05 | 0.000272 |
| ANO9    | 0.405038 | 2.05E-08 | 2.92E-07 |
| ANP32A  | 0.179072 | 0.016773 | 0.038279 |
| ANP32B  | 0.141587 | 0.059401 | 0.110676 |
| ANP32C  | 0.10941  | 0.146005 | 0.231245 |
| ANP32D  | -0.08991 | 0.232642 | 0.336388 |
| ANP32E  | 0.100701 | 0.181072 | 0.274601 |
| ANPEP   | -0.05686 | 0.450953 | 0.561758 |
| ANTXR1  | 0.18037  | 0.015984 | 0.036783 |
| ANTXR2  | 0.41661  | 7.28E-09 | 1.20E-07 |
| ANTXRL  | 0.131725 | 0.079655 | 0.141683 |
| ANUBL1  | -0.45258 | 2.26E-10 | 5.75E-09 |
| ANXA10  | 0.448956 | 3.27E-10 | 8.06E-09 |
| ANXA11  | 0.607767 | 2.35E-19 | 5.87E-17 |
| ANXA13  | 0.106426 | 0.157385 | 0.24565  |
| ANXA1   | 0.380716 | 1.59E-07 | 1.75E-06 |
| ANXA2P1 | 0.492202 | 3.00E-12 | 1.23E-10 |
| ANXA2P2 | 0.594902 | 2.02E-18 | 4.12E-16 |
| ANXA2P3 | 0.334271 | 5.11E-06 | 3.63E-05 |
| ANXA2   | 0.643432 | 3.48E-22 | 2.05E-19 |
| ANXA3   | 0.582355 | 1.51E-17 | 2.33E-15 |
| ANXA4   | 0.318007 | 1.52E-05 | 9.35E-05 |
| ANXA5   | 0.347009 | 2.08E-06 | 1.65E-05 |
| ANXA6   | -0.22177 | 0.002929 | 0.008665 |
| ANXA7   | -0.06755 | 0.370272 | 0.483493 |
| ANXA8L1 | 0.234061 | 0.001663 | 0.00533  |
| ANXA8L2 | 0.568484 | 1.26E-16 | 1.51E-14 |
| ANXA8   | 0.570127 | 9.86E-17 | 1.21E-14 |
| ANXA9   | 0.166701 | 0.02615  | 0.055744 |
| AOAH    | -0.20742 | 0.005469 | 0.014762 |
| AOC2    | -0.18067 | 0.015808 | 0.036433 |

|         |          |          |          |
|---------|----------|----------|----------|
| AOC3    | 0.054861 | 0.467023 | 0.577145 |
| AOX1    | -0.31068 | 2.43E-05 | 0.00014  |
| AOX2P   | -0.14874 | 0.047534 | 0.092129 |
| AP1AR   | -0.15016 | 0.045435 | 0.088787 |
| AP1B1   | -0.27676 | 0.000184 | 0.000806 |
| AP1G1   | -0.13276 | 0.077292 | 0.138139 |
| AP1G2   | 0.384657 | 1.15E-07 | 1.32E-06 |
| AP1M1   | 0.150501 | 0.044939 | 0.087957 |
| AP1M2   | 0.390886 | 6.87E-08 | 8.40E-07 |
| AP1S1   | 0.312596 | 2.16E-05 | 0.000126 |
| AP1S2   | -0.25372 | 0.000633 | 0.002317 |
| AP1S3   | 0.587227 | 6.98E-18 | 1.18E-15 |
| AP2A1   | 0.245559 | 0.000954 | 0.003297 |
| AP2A2   | -0.23043 | 0.001972 | 0.006161 |
| AP2B1   | 0.289956 | 8.64E-05 | 0.000419 |
| AP2M1   | 0.253842 | 0.000629 | 0.002306 |
| AP2S1   | 0.290827 | 8.21E-05 | 0.0004   |
| AP3B1   | -0.11    | 0.14384  | 0.228348 |
| AP3B2   | -0.29071 | 8.26E-05 | 0.000402 |
| AP3D1   | -0.14172 | 0.059155 | 0.110273 |
| AP3M1   | -0.33437 | 5.07E-06 | 3.61E-05 |
| AP3M2   | 0.337572 | 4.06E-06 | 2.96E-05 |
| AP3S1   | 0.176924 | 0.018152 | 0.040891 |
| AP3S2   | -0.20698 | 0.005569 | 0.014997 |
| AP4B1   | 0.377412 | 2.07E-07 | 2.20E-06 |
| AP4E1   | -0.06807 | 0.366611 | 0.480122 |
| AP4M1   | 0.110934 | 0.140436 | 0.22412  |
| AP4S1   | -0.2196  | 0.003228 | 0.009399 |
| APAF1   | -0.17074 | 0.022684 | 0.049345 |
| APBA1   | -0.49852 | 1.43E-12 | 6.44E-11 |
| APBA2   | 0.145747 | 0.052236 | 0.099577 |
| APBA3   | 0.041286 | 0.584259 | 0.68281  |
| APBB1IP | 0.078024 | 0.300568 | 0.410713 |
| APBB1   | -0.28847 | 9.43E-05 | 0.000451 |
| APBB2   | -0.1133  | 0.1321   | 0.213294 |
| APBB3   | -0.06218 | 0.409635 | 0.521713 |
| APC2    | -0.15149 | 0.043534 | 0.085655 |
| APCDD1L | 0.182127 | 0.014968 | 0.034772 |
| APCDD1  | 0.181852 | 0.015124 | 0.03508  |
| APCS    | 0.123555 | 0.100359 | 0.171063 |
| APC     | -0.36099 | 7.41E-07 | 6.72E-06 |
| APEH    | 0.199599 | 0.007559 | 0.01947  |
| APEX1   | 0.119356 | 0.112542 | 0.187861 |
| APEX2   | 0.257788 | 0.000513 | 0.001942 |
| APH1A   | 0.441493 | 6.89E-10 | 1.53E-08 |
| APH1B   | -0.27279 | 0.00023  | 0.000974 |
| API5    | -0.32969 | 6.99E-06 | 4.75E-05 |
| APIP    | -0.12748 | 0.08994  | 0.156321 |
| APITD1  | -0.29376 | 6.90E-05 | 0.000345 |
| APLF    | 0.12842  | 0.087573 | 0.153042 |
| APLNR   | -0.03526 | 0.640297 | 0.73144  |
| APLN    | -0.0856  | 0.255904 | 0.362365 |
| APLP1   | -0.28674 | 0.000104 | 0.000493 |
| APLP2   | 0.413518 | 9.64E-09 | 1.53E-07 |



|          |          |          |          |
|----------|----------|----------|----------|
| APOA1BP  | 0.069138 | 0.359134 | 0.472183 |
| APOA1    | 0.035339 | 0.639567 | 0.730774 |
| APOA2    | 0.03775  | 0.616883 | 0.711433 |
| APOA4    | 0.062946 | 0.403874 | 0.516505 |
| APOA5    | -0.03639 | 0.629657 | 0.722318 |
| APOB48R  | 0.112846 | 0.133683 | 0.215317 |
| APOBEC1  | 0.348273 | 1.90E-06 | 1.52E-05 |
| APOBEC2  | -0.00877 | 0.907495 | 0.935531 |
| APOBEC3A | 0.019145 | 0.799761 | 0.859103 |
| APOBEC3B | 0.106291 | 0.157916 | 0.246284 |
| APOBEC3C | 0.264695 | 0.000356 | 0.001425 |
| APOBEC3D | 0.165728 | 0.027049 | 0.057345 |
| APOBEC3F | -0.09159 | 0.223999 | 0.326192 |
| APOBEC3G | 0.037606 | 0.618227 | 0.712734 |
| APOBEC3H | 0.066405 | 0.378492 | 0.49116  |
| APOBEC4  | -0.2733  | 0.000223 | 0.00095  |
| APOB     | -0.09852 | 0.190738 | 0.286488 |
| APOC1P1  | 0.051856 | 0.491813 | 0.600389 |
| APOC1    | 0.253793 | 0.00063  | 0.00231  |
| APOC2    | 0.190268 | 0.010963 | 0.026726 |
| APOC3    | -0.03544 | 0.638571 | 0.729898 |
| APOC4    | 0.089882 | 0.232813 | 0.336573 |
| APOD     | 0.174285 | 0.019981 | 0.044391 |
| APOE     | 0.089518 | 0.234717 | 0.338731 |
| APOF     | -0.25855 | 0.000493 | 0.00188  |
| APOH     | -0.19621 | 0.008667 | 0.021848 |
| APOL1    | 0.578792 | 2.63E-17 | 3.74E-15 |
| APOL2    | 0.402941 | 2.46E-08 | 3.44E-07 |
| APOL3    | 0.055946 | 0.458244 | 0.568901 |
| APOL4    | 0.180955 | 0.015639 | 0.036089 |
| APOL5    | 0.000422 | 0.995544 | 0.996921 |
| APOL6    | 0.014777 | 0.844794 | 0.890598 |
| APOLD1   | -0.26816 | 0.000296 | 0.001214 |
| APOM     | 0.089185 | 0.23647  | 0.340391 |
| APOOL    | -0.32338 | 1.07E-05 | 6.88E-05 |
| APOO     | -0.30124 | 4.39E-05 | 0.000235 |
| APPBP2   | -0.37375 | 2.77E-07 | 2.84E-06 |
| APPL1    | -0.33047 | 6.63E-06 | 4.55E-05 |
| APPL2    | -0.30072 | 4.53E-05 | 0.000241 |
| APP      | -0.10593 | 0.159347 | 0.247967 |
| APRT     | 0.42779  | 2.58E-09 | 4.85E-08 |
| APTXX    | -0.02949 | 0.696021 | 0.777578 |
| AQP10    | 0.002032 | 0.978528 | 0.985204 |
| AQP11    | -0.14221 | 0.05828  | 0.108956 |
| AQP12A   | -0.17379 | 0.020343 | 0.045055 |
| AQP12B   | -0.01707 | 0.821125 | 0.873257 |
| AQP1     | -0.00237 | 0.974954 | 0.982759 |
| AQP2     | 0.302365 | 4.09E-05 | 0.000221 |
| AQP3     | -0.09924 | 0.187532 | 0.282555 |
| AQP4     | -0.30264 | 4.03E-05 | 0.000218 |
| AQP5     | 0.509876 | 3.62E-13 | 1.87E-11 |
| AQP6     | 0.297533 | 5.50E-05 | 0.000284 |
| AQP7P1   | 0.080526 | 0.285284 | 0.394195 |
| AQP7P3   | -0.00315 | 0.966697 | 0.977323 |

|           |          |          |          |
|-----------|----------|----------|----------|
| AQP7      | -0.21854 | 0.003382 | 0.009777 |
| AQP8      | -0.11237 | 0.135326 | 0.217556 |
| AQP9      | 0.121954 | 0.104875 | 0.177566 |
| AQPEP     | -0.08378 | 0.266231 | 0.373657 |
| AQR       | 0.049306 | 0.513377 | 0.619486 |
| ARAF      | 0.062728 | 0.405513 | 0.518031 |
| ARAP1     | -0.04981 | 0.509092 | 0.61563  |
| ARAP2     | 0.261242 | 0.000428 | 0.001664 |
| ARAP3     | 0.359912 | 8.04E-07 | 7.20E-06 |
| ARCN1     | -0.07431 | 0.324223 | 0.436254 |
| ARC       | -0.15418 | 0.039901 | 0.079505 |
| AREG      | 0.435947 | 1.18E-09 | 2.44E-08 |
| ARF1      | 0.23863  | 0.001338 | 0.004409 |
| ARF3      | -0.2777  | 0.000175 | 0.000771 |
| ARF4      | 0.189156 | 0.011447 | 0.027723 |
| ARF5      | 0.126069 | 0.093579 | 0.16144  |
| ARF6      | 0.379848 | 1.70E-07 | 1.86E-06 |
| ARFGAP1   | 0.020244 | 0.788538 | 0.850055 |
| ARFGAP2   | 0.003877 | 0.959039 | 0.972066 |
| ARFGAP3   | -0.13307 | 0.076606 | 0.137149 |
| ARFGEF1   | -0.0105  | 0.889332 | 0.923124 |
| ARFGEF2   | -0.29502 | 6.40E-05 | 0.000323 |
| ARFIP1    | 0.131297 | 0.080647 | 0.143165 |
| ARFIP2    | -0.08711 | 0.247612 | 0.352809 |
| ARFRP1    | 0.231503 | 0.001876 | 0.005903 |
| ARG1      | -0.26096 | 0.000434 | 0.001687 |
| ARG2      | -0.36025 | 7.84E-07 | 7.04E-06 |
| ARGFXP2   | 0.083918 | 0.265415 | 0.372856 |
| ARGFX     | 0.110314 | 0.142682 | 0.226982 |
| ARGLU1    | 0.146586 | 0.050881 | 0.097417 |
| ARHGAP10  | -0.02927 | 0.698097 | 0.779324 |
| ARHGAP11A | 0.197075 | 0.008372 | 0.02124  |
| ARHGAP11E | 0.152515 | 0.042116 | 0.083288 |
| ARHGAP12  | 0.197576 | 0.008205 | 0.02088  |
| ARHGAP15  | -0.03444 | 0.6481   | 0.737736 |
| ARHGAP17  | -0.15375 | 0.040453 | 0.080475 |
| ARHGAP18  | -0.04291 | 0.56955  | 0.669537 |
| ARHGAP19  | -0.28861 | 9.35E-05 | 0.000448 |
| ARHGAP1   | 0.220559 | 0.003092 | 0.009064 |
| ARHGAP20  | -0.1307  | 0.082049 | 0.145223 |
| ARHGAP21  | 0.276577 | 0.000186 | 0.000813 |
| ARHGAP22  | 0.129479 | 0.084969 | 0.149363 |
| ARHGAP23  | 0.281857 | 0.000138 | 0.00063  |
| ARHGAP24  | -0.27129 | 0.000249 | 0.001045 |
| ARHGAP25  | -0.03309 | 0.661058 | 0.749485 |
| ARHGAP26  | 0.296874 | 5.72E-05 | 0.000294 |
| ARHGAP27  | 0.642586 | 4.10E-22 | 2.32E-19 |
| ARHGAP28  | -0.23206 | 0.001827 | 0.005771 |
| ARHGAP29  | -0.01399 | 0.852974 | 0.897166 |
| ARHGAP30  | 0.046519 | 0.537499 | 0.64085  |
| ARHGAP31  | -0.11703 | 0.119783 | 0.197103 |
| ARHGAP32  | 0.341266 | 3.14E-06 | 2.36E-05 |
| ARHGAP33  | -0.02503 | 0.740116 | 0.812607 |
| ARHGAP36  | -0.17431 | 0.019963 | 0.044375 |

|           |          |          |          |
|-----------|----------|----------|----------|
| ARHGAP39  | -0.12549 | 0.095098 | 0.163647 |
| ARHGAP42  | 0.258886 | 0.000484 | 0.00185  |
| ARHGAP4   | 0.103892 | 0.167567 | 0.258441 |
| ARHGAP5   | -0.04576 | 0.544186 | 0.647106 |
| ARHGAP6   | 0.032969 | 0.662198 | 0.750605 |
| ARHGAP8   | 0.509054 | 4.00E-13 | 2.06E-11 |
| ARHGAP9   | 0.033499 | 0.657109 | 0.745835 |
| ARHGDIA   | 0.327195 | 8.28E-06 | 5.50E-05 |
| ARHGDIB   | 0.229747 | 0.002036 | 0.006328 |
| ARHGDIG   | -0.06119 | 0.417182 | 0.529552 |
| ARHGEF10I | -0.1839  | 0.014    | 0.032852 |
| ARHGEF10  | 0.215753 | 0.003824 | 0.010891 |
| ARHGEF11  | -0.23868 | 0.001335 | 0.0044   |
| ARHGEF12  | -0.05972 | 0.428428 | 0.54051  |
| ARHGEF15  | -0.24273 | 0.001096 | 0.003717 |
| ARHGEF16  | 0.432031 | 1.73E-09 | 3.41E-08 |
| ARHGEF17  | 0.015999 | 0.832135 | 0.881058 |
| ARHGEF18  | 0.361004 | 7.40E-07 | 6.71E-06 |
| ARHGEF19  | 0.249158 | 0.000797 | 0.00284  |
| ARHGEF1   | 0.257872 | 0.000511 | 0.001935 |
| ARHGEF2   | 0.417045 | 7.00E-09 | 1.16E-07 |
| ARHGEF33  | -0.24532 | 0.000965 | 0.003331 |
| ARHGEF35  | 0.308357 | 2.82E-05 | 0.00016  |
| ARHGEF37  | -0.22644 | 0.00237  | 0.007219 |
| ARHGEF38  | 0.175406 | 0.019186 | 0.042877 |
| ARHGEF3   | -0.08781 | 0.24382  | 0.348486 |
| ARHGEF4   | 0.002039 | 0.978446 | 0.985172 |
| ARHGEF5   | 0.426152 | 3.02E-09 | 5.57E-08 |
| ARHGEF6   | -0.15334 | 0.040999 | 0.081389 |
| ARHGEF7   | 0.076826 | 0.308074 | 0.418483 |
| ARHGEF9   | -0.30192 | 4.21E-05 | 0.000226 |
| ARID1A    | -0.34932 | 1.76E-06 | 1.42E-05 |
| ARID1B    | -0.29414 | 6.74E-05 | 0.000338 |
| ARID2     | -0.32378 | 1.04E-05 | 6.73E-05 |
| ARID3A    | -0.29362 | 6.95E-05 | 0.000347 |
| ARID3B    | -0.03609 | 0.632488 | 0.724445 |
| ARID3C    | 0.080636 | 0.284625 | 0.393551 |
| ARID4A    | -0.08676 | 0.249504 | 0.354992 |
| ARID4B    | -0.10043 | 0.182262 | 0.276024 |
| ARID5A    | 0.124524 | 0.0977   | 0.167411 |
| ARID5B    | -0.223   | 0.002771 | 0.008257 |
| ARIH1     | -0.1009  | 0.180216 | 0.273533 |
| ARIH2     | -0.27436 | 0.000211 | 0.000904 |
| ARL10     | -0.19573 | 0.008837 | 0.022207 |
| ARL11     | 0.071721 | 0.341424 | 0.453778 |
| ARL13A    | 0.079754 | 0.289946 | 0.399443 |
| ARL13B    | -0.27069 | 0.000258 | 0.001076 |
| ARL14     | 0.570923 | 8.75E-17 | 1.09E-14 |
| ARL15     | -0.2702  | 0.000265 | 0.001102 |
| ARL16     | 0.207967 | 0.005343 | 0.014491 |
| ARL17A    | -0.03971 | 0.598691 | 0.695524 |
| ARL17B    | 0.037065 | 0.623287 | 0.717104 |
| ARL1      | -0.40746 | 1.65E-08 | 2.42E-07 |
| ARL2BP    | 0.083897 | 0.265535 | 0.372995 |

|         |          |          |          |
|---------|----------|----------|----------|
| ARL2    | 0.075951 | 0.313632 | 0.424574 |
| ARL3    | -0.23529 | 0.00157  | 0.005068 |
| ARL4A   | 0.024084 | 0.749645 | 0.820155 |
| ARL4C   | 0.306802 | 3.11E-05 | 0.000174 |
| ARL4D   | 0.300938 | 4.47E-05 | 0.000238 |
| ARL5A   | -0.2547  | 0.000601 | 0.002221 |
| ARL5B   | -0.04286 | 0.569982 | 0.669946 |
| ARL5C   | -0.23786 | 0.001388 | 0.004556 |
| ARL6IP1 | 0.321596 | 1.20E-05 | 7.62E-05 |
| ARL6IP4 | -0.03756 | 0.618618 | 0.713061 |
| ARL6IP5 | 0.193209 | 0.009767 | 0.0242   |
| ARL6IP6 | 0.213476 | 0.004222 | 0.011849 |
| ARL6    | -0.27476 | 0.000206 | 0.000888 |
| ARL8A   | 0.337153 | 4.19E-06 | 3.04E-05 |
| ARL8B   | 0.07831  | 0.298792 | 0.408795 |
| ARL9    | -0.04198 | 0.577978 | 0.67703  |
| ARMC10  | 0.378561 | 1.89E-07 | 2.04E-06 |
| ARMC1   | -0.25562 | 0.000574 | 0.002138 |
| ARMC2   | -0.5521  | 1.37E-15 | 1.21E-13 |
| ARMC3   | -0.10279 | 0.172143 | 0.263934 |
| ARMC4   | -0.34467 | 2.46E-06 | 1.91E-05 |
| ARMC5   | -0.14045 | 0.06149  | 0.113943 |
| ARMC6   | -0.11184 | 0.137186 | 0.21992  |
| ARMC7   | 0.247832 | 0.000852 | 0.002995 |
| ARMC8   | -0.10312 | 0.170773 | 0.262269 |
| ARMC9   | 0.107867 | 0.15181  | 0.238643 |
| ARMCX1  | -0.24788 | 0.00085  | 0.002989 |
| ARMCX2  | -0.253   | 0.000656 | 0.002388 |
| ARMCX3  | -0.49495 | 2.18E-12 | 9.29E-11 |
| ARMCX5  | -0.16774 | 0.025215 | 0.054008 |
| ARMCX6  | 0.03126  | 0.678712 | 0.763725 |
| ARMS2   | -0.10157 | 0.17733  | 0.269982 |
| ARNT2   | -0.56168 | 3.45E-16 | 3.63E-14 |
| ARNTL2  | 0.281908 | 0.000138 | 0.000629 |
| ARNTL   | -0.13188 | 0.079295 | 0.141108 |
| ARNT    | -0.09572 | 0.203742 | 0.302508 |
| ARPC1A  | 0.292926 | 7.25E-05 | 0.000359 |
| ARPC1B  | 0.533551 | 1.74E-14 | 1.22E-12 |
| ARPC2   | 0.493649 | 2.53E-12 | 1.07E-10 |
| ARPC3   | 0.326369 | 8.75E-06 | 5.77E-05 |
| ARPC4   | 0.390996 | 6.81E-08 | 8.34E-07 |
| ARPC5L  | 0.226334 | 0.002382 | 0.007248 |
| ARPC5   | 0.457923 | 1.30E-10 | 3.57E-09 |
| ARPM1   | 0.23777  | 0.001394 | 0.004572 |
| ARPP19  | -0.12809 | 0.088393 | 0.154147 |
| ARPP21  | -0.20997 | 0.004908 | 0.013484 |
| ARR3    | -0.03096 | 0.681641 | 0.766318 |
| ARRB1   | -0.01217 | 0.871886 | 0.911337 |
| ARRB2   | -0.22148 | 0.002968 | 0.00877  |
| ARRDC1  | 0.453536 | 2.05E-10 | 5.29E-09 |
| ARRDC2  | 0.417084 | 6.98E-09 | 1.16E-07 |
| ARRDC3  | 0.046752 | 0.535458 | 0.639072 |
| ARRDC4  | -0.25432 | 0.000613 | 0.002259 |
| ARRDC5  | 0.055979 | 0.457981 | 0.568815 |

|          |          |          |          |
|----------|----------|----------|----------|
| ARSA     | -0.04431 | 0.557038 | 0.658351 |
| ARSB     | -0.30633 | 3.20E-05 | 0.000179 |
| ARSD     | 0.182511 | 0.014754 | 0.034392 |
| ARSE     | 0.051238 | 0.49699  | 0.604545 |
| ARSF     | -0.10026 | 0.182982 | 0.276881 |
| ARSG     | -0.39465 | 5.00E-08 | 6.40E-07 |
| ARSH     | 0.06752  | 0.370518 | 0.483733 |
| ARSI     | 0.214864 | 0.003975 | 0.011267 |
| ARSJ     | -0.1558  | 0.037828 | 0.076057 |
| ARSK     | -0.36838 | 4.21E-07 | 4.09E-06 |
| ART1     | -0.02679 | 0.722623 | 0.798499 |
| ART3     | -0.12122 | 0.106994 | 0.180459 |
| ART4     | -0.15956 | 0.033379 | 0.068533 |
| ART5     | 0.109819 | 0.144494 | 0.229201 |
| ARTN     | 0.119003 | 0.113617 | 0.189176 |
| ARV1     | 0.20511  | 0.006024 | 0.016027 |
| ARVCF    | -0.20526 | 0.005987 | 0.015956 |
| ARX      | -0.19549 | 0.008922 | 0.02237  |
| AR       | -0.10809 | 0.150952 | 0.23754  |
| AS3MT    | -0.13153 | 0.080099 | 0.142345 |
| ASAH1    | -0.13296 | 0.076849 | 0.137502 |
| ASAH2B   | -0.11607 | 0.122867 | 0.201024 |
| ASAH2    | -0.10976 | 0.144692 | 0.229459 |
| ASAM     | -0.00463 | 0.951125 | 0.96696  |
| ASAP1IT1 | 0.016906 | 0.822774 | 0.874472 |
| ASAP1    | -0.09019 | 0.231232 | 0.334727 |
| ASAP2    | 0.537258 | 1.06E-14 | 7.81E-13 |
| ASAP3    | -0.00209 | 0.977873 | 0.984845 |
| ASB10    | -0.0955  | 0.204773 | 0.303719 |
| ASB11    | -0.13079 | 0.081826 | 0.144933 |
| ASB12    | 0.036302 | 0.630463 | 0.722921 |
| ASB13    | -0.01106 | 0.883506 | 0.919062 |
| ASB14    | -0.14844 | 0.047987 | 0.092829 |
| ASB15    | -0.14594 | 0.051919 | 0.099077 |
| ASB16    | -0.27903 | 0.000162 | 0.000723 |
| ASB17    | -0.06068 | 0.421082 | 0.53327  |
| ASB18    | 0.078753 | 0.296061 | 0.406098 |
| ASB1     | -0.18295 | 0.014513 | 0.033894 |
| ASB2     | -0.03058 | 0.685309 | 0.76949  |
| ASB3     | 0.022272 | 0.767926 | 0.834752 |
| ASB4     | -0.29859 | 5.16E-05 | 0.000269 |
| ASB5     | -0.16598 | 0.026812 | 0.05695  |
| ASB6     | 0.069305 | 0.357969 | 0.471051 |
| ASB7     | -0.11165 | 0.137865 | 0.220791 |
| ASB8     | -0.42417 | 3.63E-09 | 6.58E-08 |
| ASB9     | -0.08534 | 0.257353 | 0.363727 |
| ASCC1    | 0.097435 | 0.195713 | 0.292534 |
| ASCC2    | 0.14025  | 0.06187  | 0.114585 |
| ASCC3    | -0.29831 | 5.25E-05 | 0.000273 |
| ASCL1    | -0.32318 | 1.08E-05 | 6.96E-05 |
| ASCL2    | -0.16353 | 0.029174 | 0.061164 |
| ASCL3    | 0.14663  | 0.050811 | 0.097311 |
| ASCL4    | -0.08512 | 0.258609 | 0.365032 |
| ASF1A    | -0.31954 | 1.38E-05 | 8.56E-05 |

|         |          |          |          |
|---------|----------|----------|----------|
| ASF1B   | 0.469037 | 4.01E-11 | 1.27E-09 |
| ASFMR1  | -0.024   | 0.750474 | 0.82088  |
| ASGR1   | -0.14051 | 0.061392 | 0.113804 |
| ASGR2   | -0.24837 | 0.000829 | 0.002929 |
| ASH1L   | -0.238   | 0.001379 | 0.004531 |
| ASH2L   | 0.113458 | 0.131573 | 0.212611 |
| ASIP    | 0.116651 | 0.120986 | 0.198554 |
| ASL     | 0.380357 | 1.63E-07 | 1.80E-06 |
| ASMTL   | -0.09074 | 0.228342 | 0.331223 |
| ASMT    | -0.06538 | 0.385893 | 0.498605 |
| ASNA1   | -0.00648 | 0.931581 | 0.952873 |
| ASNSD1  | -0.29799 | 5.35E-05 | 0.000278 |
| ASNS    | -0.30497 | 3.49E-05 | 0.000192 |
| ASPA    | -0.13454 | 0.073384 | 0.132266 |
| ASPDH   | -0.19602 | 0.008735 | 0.022    |
| ASPG    | 0.325243 | 9.43E-06 | 6.17E-05 |
| ASPHD1  | 0.237503 | 0.001412 | 0.004622 |
| ASPHD2  | 0.323162 | 1.08E-05 | 6.97E-05 |
| ASPH    | 0.276874 | 0.000183 | 0.000802 |
| ASPM    | 0.331763 | 6.07E-06 | 4.22E-05 |
| ASPN    | 0.131152 | 0.080984 | 0.143648 |
| ASPRV1  | -0.16328 | 0.029425 | 0.061636 |
| ASPSCR1 | -0.01536 | 0.838768 | 0.886209 |
| ASRGL1  | -0.16031 | 0.03255  | 0.067057 |
| ASS1    | 0.255752 | 0.00057  | 0.002126 |
| ASTE1   | -0.06368 | 0.398412 | 0.511073 |
| ASTL    | 0.043281 | 0.56621  | 0.666645 |
| ASTN1   | -0.34366 | 2.65E-06 | 2.03E-05 |
| ASTN2   | -0.49308 | 2.71E-12 | 1.13E-10 |
| ASXL1   | -0.3427  | 2.83E-06 | 2.16E-05 |
| ASXL2   | -0.18462 | 0.013625 | 0.032151 |
| ASXL3   | -0.38025 | 1.65E-07 | 1.81E-06 |
| ASZ1    | -0.04476 | 0.552999 | 0.654869 |
| ATAD1   | 0.07628  | 0.311532 | 0.422338 |
| ATAD2B  | -0.05313 | 0.481184 | 0.590533 |
| ATAD2   | -0.01387 | 0.854215 | 0.897945 |
| ATAD3A  | 0.155205 | 0.038579 | 0.077306 |
| ATAD3B  | 0.151817 | 0.043077 | 0.084866 |
| ATAD3C  | -0.12779 | 0.089163 | 0.155261 |
| ATAD5   | 0.066409 | 0.378457 | 0.491158 |
| ATCAY   | -0.28189 | 0.000138 | 0.00063  |
| ATE1    | -0.18699 | 0.012444 | 0.029768 |
| ATF1    | -0.3079  | 2.90E-05 | 0.000164 |
| ATF2    | -0.1623  | 0.030432 | 0.063424 |
| ATF3    | 0.029951 | 0.691459 | 0.773967 |
| ATF4    | 0.01041  | 0.890312 | 0.923663 |
| ATF5    | -0.00571 | 0.939743 | 0.959343 |
| ATF6B   | 0.123655 | 0.100081 | 0.170716 |
| ATF6    | -0.14171 | 0.059175 | 0.11029  |
| ATF7IP2 | 0.327057 | 8.35E-06 | 5.55E-05 |
| ATF7IP  | -0.1338  | 0.07499  | 0.134769 |
| ATF7    | -0.0421  | 0.576834 | 0.67601  |
| ATG10   | -0.06796 | 0.367412 | 0.481012 |
| ATG12   | 0.106429 | 0.157375 | 0.24565  |

|         |          |          |          |
|---------|----------|----------|----------|
| ATG16L1 | 0.496251 | 1.87E-12 | 8.18E-11 |
| ATG16L2 | 0.080395 | 0.286072 | 0.395082 |
| ATG2A   | 0.071723 | 0.341406 | 0.453778 |
| ATG2B   | -0.52503 | 5.34E-14 | 3.40E-12 |
| ATG3    | 0.063675 | 0.398442 | 0.511079 |
| ATG4A   | -0.25826 | 0.0005   | 0.001903 |
| ATG4B   | 0.226404 | 0.002375 | 0.00723  |
| ATG4C   | -0.2384  | 0.001352 | 0.004449 |
| ATG4D   | -0.07094 | 0.346694 | 0.459117 |
| ATG5    | -0.11409 | 0.129412 | 0.209702 |
| ATG7    | 0.307342 | 3.01E-05 | 0.000169 |
| ATG9A   | 0.036333 | 0.630168 | 0.722666 |
| ATG9B   | 0.331741 | 6.08E-06 | 4.22E-05 |
| ATHL1   | 0.378446 | 1.90E-07 | 2.05E-06 |
| ATIC    | 0.409649 | 1.36E-08 | 2.05E-07 |
| ATL1    | -0.23136 | 0.001889 | 0.005939 |
| ATL2    | 0.067579 | 0.370101 | 0.483411 |
| ATL3    | 0.163983 | 0.028727 | 0.060359 |
| ATMIN   | -0.11593 | 0.123309 | 0.20158  |
| ATM     | -0.18235 | 0.014843 | 0.034526 |
| ATN1    | -0.20088 | 0.007174 | 0.01859  |
| ATOH1   | -0.09917 | 0.187819 | 0.282858 |
| ATOH7   | -0.09961 | 0.185889 | 0.280422 |
| ATOH8   | -0.31783 | 1.54E-05 | 9.45E-05 |
| ATOX1   | 0.111881 | 0.137058 | 0.219768 |
| ATP10A  | 0.260941 | 0.000435 | 0.001688 |
| ATP10B  | 0.317359 | 1.59E-05 | 9.69E-05 |
| ATP10D  | -0.31295 | 2.11E-05 | 0.000124 |
| ATP11A  | 0.11441  | 0.128343 | 0.208295 |
| ATP11B  | 0.231585 | 0.001869 | 0.005885 |
| ATP11C  | 0.047696 | 0.527247 | 0.632359 |
| ATP12A  | -0.04179 | 0.579646 | 0.678541 |
| ATP13A1 | -0.0325  | 0.666752 | 0.754124 |
| ATP13A2 | -0.10797 | 0.151423 | 0.238149 |
| ATP13A3 | -0.11944 | 0.112285 | 0.187558 |
| ATP13A4 | -0.0596  | 0.429382 | 0.541251 |
| ATP13A5 | -0.04222 | 0.575748 | 0.675057 |
| ATP1A1  | 0.10789  | 0.151719 | 0.238538 |
| ATP1A2  | -0.1644  | 0.028315 | 0.059622 |
| ATP1A3  | -0.26784 | 0.000301 | 0.00123  |
| ATP1A4  | -0.06209 | 0.410297 | 0.522355 |
| ATP1B1  | 0.184436 | 0.01372  | 0.03232  |
| ATP1B2  | -0.31651 | 1.68E-05 | 0.000101 |
| ATP1B3  | 0.392795 | 5.85E-08 | 7.31E-07 |
| ATP1B4  | 0.018004 | 0.811469 | 0.866601 |
| ATP2A1  | 0.309021 | 2.70E-05 | 0.000154 |
| ATP2A2  | -0.24058 | 0.001217 | 0.004068 |
| ATP2A3  | -0.33834 | 3.85E-06 | 2.82E-05 |
| ATP2B1  | -0.44661 | 4.14E-10 | 9.86E-09 |
| ATP2B2  | -0.31558 | 1.78E-05 | 0.000107 |
| ATP2B3  | -0.31345 | 2.04E-05 | 0.000121 |
| ATP2B4  | 0.250011 | 0.000764 | 0.002732 |
| ATP2C1  | 0.176594 | 0.018372 | 0.041296 |
| ATP2C2  | 0.239322 | 0.001294 | 0.004291 |

|          |          |          |          |
|----------|----------|----------|----------|
| ATP4A    | -0.20134 | 0.007039 | 0.018332 |
| ATP4B    | -0.09768 | 0.194594 | 0.291204 |
| ATP5A1   | -0.39606 | 4.44E-08 | 5.73E-07 |
| ATP5B    | -0.13613 | 0.07     | 0.127281 |
| ATP5C1   | 0.192975 | 0.009858 | 0.024394 |
| ATP5D    | 0.139968 | 0.062401 | 0.115491 |
| ATP5EP2  | -0.06474 | 0.390557 | 0.50325  |
| ATP5E    | 0.091171 | 0.226153 | 0.328651 |
| ATP5F1   | 0.028184 | 0.708817 | 0.787905 |
| ATP5G1   | 0.034516 | 0.647385 | 0.737232 |
| ATP5G2   | 0.003133 | 0.966897 | 0.977426 |
| ATP5G3   | 0.205103 | 0.006026 | 0.01603  |
| ATP5H    | 0.209249 | 0.00506  | 0.013835 |
| ATP5I    | 0.084378 | 0.262793 | 0.369776 |
| ATP5J2   | 0.202744 | 0.006645 | 0.017464 |
| ATP5J    | 0.015208 | 0.840322 | 0.887161 |
| ATP5L2   | 0.021499 | 0.775768 | 0.840596 |
| ATP5L    | 0.054366 | 0.47106  | 0.581143 |
| ATP5O    | 0.239833 | 0.001262 | 0.0042   |
| ATP5SL   | 0.125353 | 0.095471 | 0.164203 |
| ATP5S    | -0.22415 | 0.002631 | 0.007892 |
| ATP6AP1L | 0.063592 | 0.399058 | 0.511637 |
| ATP6AP1  | -0.35969 | 8.18E-07 | 7.30E-06 |
| ATP6AP2  | -0.25855 | 0.000493 | 0.00188  |
| ATP6VOA1 | -0.29261 | 7.38E-05 | 0.000365 |
| ATP6VOA2 | -0.2075  | 0.005449 | 0.014717 |
| ATP6VOA4 | -0.01367 | 0.856273 | 0.899726 |
| ATP6VOB  | -0.08822 | 0.241626 | 0.346099 |
| ATP6VOC  | 0.171189 | 0.022328 | 0.048705 |
| ATP6VOD1 | -0.11936 | 0.11254  | 0.187861 |
| ATP6VOD2 | 0.160151 | 0.032725 | 0.067366 |
| ATP6VOE1 | 0.174015 | 0.020177 | 0.044743 |
| ATP6VOE2 | -0.34599 | 2.24E-06 | 1.75E-05 |
| ATP6V1A  | -0.193   | 0.009848 | 0.024374 |
| ATP6V1B1 | 0.27548  | 0.000198 | 0.000858 |
| ATP6V1B2 | -0.3012  | 4.40E-05 | 0.000235 |
| ATP6V1C1 | -0.34012 | 3.40E-06 | 2.54E-05 |
| ATP6V1C2 | -0.0023  | 0.975717 | 0.983325 |
| ATP6V1D  | 0.106836 | 0.155785 | 0.243844 |
| ATP6V1E1 | 0.066613 | 0.376995 | 0.489636 |
| ATP6V1E2 | -0.21481 | 0.003984 | 0.011285 |
| ATP6V1F  | 0.141087 | 0.060316 | 0.112073 |
| ATP6V1G1 | -0.32035 | 1.30E-05 | 8.18E-05 |
| ATP6V1G2 | -0.29291 | 7.25E-05 | 0.000359 |
| ATP6V1G3 | 0.047461 | 0.529283 | 0.633768 |
| ATP6V1H  | -0.06037 | 0.423445 | 0.53568  |
| ATP7A    | -0.17571 | 0.018974 | 0.042482 |
| ATP7B    | 0.134511 | 0.073437 | 0.13235  |
| ATP8A1   | -0.31529 | 1.81E-05 | 0.000109 |
| ATP8A2   | -0.37442 | 2.62E-07 | 2.71E-06 |
| ATP8B1   | 0.068383 | 0.364422 | 0.477699 |
| ATP8B2   | -0.35367 | 1.28E-06 | 1.07E-05 |
| ATP8B3   | 0.295188 | 6.33E-05 | 0.00032  |
| ATP8B4   | -0.11895 | 0.113781 | 0.189418 |



|          |          |          |          |
|----------|----------|----------|----------|
| ATP8B5P  | 0.276448 | 0.000187 | 0.000818 |
| ATP9A    | -0.41044 | 1.27E-08 | 1.94E-07 |
| ATP9B    | -0.37978 | 1.71E-07 | 1.87E-06 |
| ATPAF1   | -0.31728 | 1.59E-05 | 9.73E-05 |
| ATPAF2   | -0.20097 | 0.007149 | 0.018534 |
| ATPBD4   | 0.171897 | 0.021771 | 0.047643 |
| ATPIF1   | 0.126026 | 0.093691 | 0.161619 |
| ATRIP    | 0.024423 | 0.746241 | 0.817335 |
| ATRNL1   | -0.36276 | 6.48E-07 | 5.98E-06 |
| ATRN     | -0.49841 | 1.45E-12 | 6.51E-11 |
| ATRX     | -0.20262 | 0.006678 | 0.017537 |
| ATR      | 0.089001 | 0.237442 | 0.341421 |
| ATXN10   | -0.27899 | 0.000162 | 0.000724 |
| ATXN1L   | -0.20377 | 0.006368 | 0.016828 |
| ATXN1    | -0.08675 | 0.249564 | 0.355052 |
| ATXN2L   | 0.212983 | 0.004312 | 0.012053 |
| ATXN2    | -0.15796 | 0.035217 | 0.071652 |
| ATXN3L   | 0.087213 | 0.247038 | 0.352118 |
| ATXN3    | 0.020024 | 0.790779 | 0.852002 |
| ATXN7L1  | -0.10793 | 0.151564 | 0.238335 |
| ATXN7L2  | -0.101   | 0.179769 | 0.273074 |
| ATXN7L3B | -0.18224 | 0.014903 | 0.034651 |
| ATXN7L3  | 0.191319 | 0.010521 | 0.025808 |
| ATXN7    | -0.1752  | 0.019328 | 0.043132 |
| ATXN8OS  | -0.05732 | 0.447236 | 0.558417 |
| AUH      | -0.33768 | 4.04E-06 | 2.94E-05 |
| AUP1     | 0.376605 | 2.20E-07 | 2.33E-06 |
| AURKAIP1 | 0.156811 | 0.036589 | 0.073978 |
| AURKAPS1 | 0.068513 | 0.363502 | 0.476777 |
| AURKA    | 0.229695 | 0.002041 | 0.00634  |
| AURKB    | 0.315539 | 1.78E-05 | 0.000107 |
| AURKC    | 0.040556 | 0.590925 | 0.688606 |
| AUTS2    | -0.09476 | 0.208326 | 0.307903 |
| AVEN     | 0.224051 | 0.002643 | 0.007923 |
| AVIL     | -0.00697 | 0.92647  | 0.948943 |
| AVL9     | 0.091942 | 0.222234 | 0.324337 |
| AVPI1    | 0.38557  | 1.07E-07 | 1.23E-06 |
| AVPRIA   | -0.09578 | 0.203444 | 0.302133 |
| AVPR1B   | -0.28527 | 0.000114 | 0.000532 |
| AVPR2    | -0.01495 | 0.842948 | 0.889079 |
| AWAT1    | -0.21339 | 0.004237 | 0.011881 |
| AWAT2    | -0.12991 | 0.08392  | 0.14786  |
| AXIN1    | 0.24788  | 0.00085  | 0.002989 |
| AXIN2    | -0.11255 | 0.13472  | 0.216775 |
| AXL      | 0.302093 | 4.16E-05 | 0.000224 |
| AZGP1    | 0.121521 | 0.106123 | 0.179265 |
| AZI1     | 0.078143 | 0.299829 | 0.409931 |
| AZI2     | -0.31965 | 1.37E-05 | 8.51E-05 |
| AZIN1    | -0.04692 | 0.533961 | 0.637805 |
| AZU1     | 0.172196 | 0.021539 | 0.047201 |
| B2M      | 0.32374  | 1.04E-05 | 6.75E-05 |
| B3GALNT1 | 0.015409 | 0.838242 | 0.885817 |
| B3GALNT2 | -0.33487 | 4.90E-06 | 3.50E-05 |
| B3GALT1  | -0.38379 | 1.24E-07 | 1.40E-06 |

|          |          |          |          |
|----------|----------|----------|----------|
| B3GALT2  | -0.28557 | 0.000112 | 0.000524 |
| B3GALT4  | 0.384477 | 1.17E-07 | 1.34E-06 |
| B3GALT5  | 0.347561 | 2.00E-06 | 1.59E-05 |
| B3GALT6  | -0.05105 | 0.498574 | 0.606024 |
| B3GALTL  | 0.220913 | 0.003044 | 0.008955 |
| B3GAT1   | -0.31554 | 1.78E-05 | 0.000107 |
| B3GAT2   | 0.036012 | 0.633195 | 0.725002 |
| B3GAT3   | 0.061146 | 0.417479 | 0.529895 |
| B3GNT1   | -0.39087 | 6.88E-08 | 8.41E-07 |
| B3GNT2   | 0.191346 | 0.01051  | 0.025785 |
| B3GNT3   | 0.529851 | 2.85E-14 | 1.89E-12 |
| B3GNT4   | 0.079939 | 0.288822 | 0.398175 |
| B3GNT5   | 0.275204 | 0.000201 | 0.00087  |
| B3GNT6   | 0.281106 | 0.000144 | 0.000653 |
| B3GNT7   | 0.34901  | 1.80E-06 | 1.45E-05 |
| B3GNT8   | -0.06534 | 0.386205 | 0.498943 |
| B3GNT9   | 0.049576 | 0.511072 | 0.617323 |
| B3GNTL1  | 0.295518 | 6.21E-05 | 0.000315 |
| B4GALNT1 | 0.053665 | 0.476802 | 0.586373 |
| B4GALNT2 | -0.16036 | 0.032492 | 0.066976 |
| B4GALNT3 | 0.11309  | 0.132838 | 0.214184 |
| B4GALNT4 | -0.22161 | 0.00295  | 0.008723 |
| B4GALT1  | 0.247006 | 0.000888 | 0.003104 |
| B4GALT2  | 0.223944 | 0.002656 | 0.007956 |
| B4GALT3  | 0.025079 | 0.739674 | 0.812347 |
| B4GALT4  | 0.416593 | 7.29E-09 | 1.20E-07 |
| B4GALT5  | 0.285171 | 0.000114 | 0.000534 |
| B4GALT6  | -0.4367  | 1.10E-09 | 2.29E-08 |
| B4GALT7  | 0.041365 | 0.583541 | 0.682169 |
| B9D1     | -0.38535 | 1.09E-07 | 1.25E-06 |
| B9D2     | -0.01756 | 0.816055 | 0.869761 |
| BAALC    | -0.10273 | 0.172387 | 0.264186 |
| BAAT     | 0.069029 | 0.359892 | 0.473014 |
| BACE1    | -0.38881 | 8.17E-08 | 9.79E-07 |
| BACE2    | 0.36449  | 5.68E-07 | 5.32E-06 |
| BACH1    | 0.122722 | 0.10269  | 0.174464 |
| BACH2    | -0.23764 | 0.001403 | 0.004598 |
| BAD      | 0.331343 | 6.25E-06 | 4.33E-05 |
| BAG1     | 0.125982 | 0.093808 | 0.161788 |
| BAG2     | -0.18034 | 0.016002 | 0.036807 |
| BAG3     | 0.310518 | 2.46E-05 | 0.000141 |
| BAG4     | 0.032793 | 0.663891 | 0.75202  |
| BAG5     | -0.07793 | 0.301158 | 0.411349 |
| BAGE2    | -0.27115 | 0.000251 | 0.001053 |
| BAGE     | -0.072   | 0.339568 | 0.451828 |
| BAHCC1   | -0.14582 | 0.052125 | 0.099404 |
| BAHD1    | -0.22147 | 0.002969 | 0.00877  |
| BAI1     | 0.121647 | 0.105759 | 0.178741 |
| BAI2     | 0.114707 | 0.12735  | 0.207005 |
| BAI3     | -0.3533  | 1.32E-06 | 1.10E-05 |
| BAIAP2L1 | 0.50334  | 8.02E-13 | 3.74E-11 |
| BAIAP2L2 | 0.322125 | 1.16E-05 | 7.41E-05 |
| BAIAP2   | 0.24132  | 0.001174 | 0.003943 |
| BAIAP3   | -0.08004 | 0.288226 | 0.397477 |

|        |          |          |          |
|--------|----------|----------|----------|
| BAK1   | 0.387064 | 9.44E-08 | 1.11E-06 |
| BAMBI  | -0.11908 | 0.113367 | 0.188857 |
| BANF1  | 0.266681 | 0.00032  | 0.001298 |
| BANF2  | -0.20896 | 0.005124 | 0.013988 |
| BANK1  | 0.189596 | 0.011253 | 0.027323 |
| BANP   | -0.02469 | 0.743582 | 0.815238 |
| BAP1   | -0.00936 | 0.901333 | 0.931092 |
| BARD1  | 0.048844 | 0.517334 | 0.623234 |
| BARHL1 | -0.03932 | 0.60229  | 0.698598 |
| BARHL2 | -0.04565 | 0.545167 | 0.647961 |
| BARX1  | 0.229085 | 0.002099 | 0.006506 |
| BARX2  | 0.345114 | 2.39E-06 | 1.85E-05 |
| BASE   | -0.15607 | 0.037498 | 0.075455 |
| BASP1  | 0.058145 | 0.440747 | 0.552556 |
| BAT1   | 0.08625  | 0.252315 | 0.358193 |
| BAT2L1 | -0.48965 | 4.03E-12 | 1.61E-10 |
| BAT2L2 | 0.054301 | 0.471594 | 0.581632 |
| BAT2   | -0.23028 | 0.001986 | 0.006197 |
| BAT3   | -0.02211 | 0.769595 | 0.835969 |
| BAT4   | -0.11679 | 0.120555 | 0.198123 |
| BAT5   | -0.23946 | 0.001285 | 0.004268 |
| BATF2  | 0.319268 | 1.40E-05 | 8.71E-05 |
| BATF3  | -0.0485  | 0.520307 | 0.6259   |
| BATF   | 0.583126 | 1.34E-17 | 2.08E-15 |
| BAX    | 0.195037 | 0.009084 | 0.022716 |
| BAZ1A  | 0.279377 | 0.000159 | 0.000711 |
| BAZ1B  | -0.3498  | 1.70E-06 | 1.38E-05 |
| BAZ2A  | -0.15541 | 0.038323 | 0.076847 |
| BAZ2B  | -0.08738 | 0.246127 | 0.351098 |
| BBC3   | 0.368816 | 4.07E-07 | 3.98E-06 |
| BBOX1  | 0.065055 | 0.388281 | 0.500888 |
| BBS10  | -0.29953 | 4.87E-05 | 0.000257 |
| BBS12  | -0.15114 | 0.044028 | 0.086474 |
| BBS1   | -0.13197 | 0.079082 | 0.140772 |
| BBS2   | -0.05556 | 0.461396 | 0.5717   |
| BBS4   | -0.22728 | 0.002281 | 0.006989 |
| BBS5   | -0.35162 | 1.49E-06 | 1.22E-05 |
| BBS7   | -0.16254 | 0.030181 | 0.06298  |
| BBS9   | -0.20815 | 0.005301 | 0.014395 |
| BBX    | -0.15734 | 0.035949 | 0.072912 |
| BCAM   | -0.15737 | 0.035919 | 0.072863 |
| BCAN   | 0.208661 | 0.005188 | 0.01413  |
| BCAP29 | -0.14705 | 0.050145 | 0.09622  |
| BCAP31 | 0.161468 | 0.031302 | 0.064894 |
| BCAR1  | 0.349162 | 1.78E-06 | 1.43E-05 |
| BCAR3  | 0.31512  | 1.83E-05 | 0.00011  |
| BCAR4  | -0.03944 | 0.601213 | 0.697552 |
| BCAS1  | 0.437639 | 1.01E-09 | 2.13E-08 |
| BCAS2  | -0.09775 | 0.194273 | 0.29085  |
| BCAS3  | -0.13906 | 0.064134 | 0.11807  |
| BCAS4  | 0.24697  | 0.000889 | 0.003109 |
| BCAT1  | 0.109047 | 0.147352 | 0.232913 |
| BCAT2  | -0.08637 | 0.251672 | 0.357557 |
| BCCIP  | 0.08536  | 0.257261 | 0.363622 |

|         |          |          |          |
|---------|----------|----------|----------|
| BCDIN3D | -0.29927 | 4.95E-05 | 0.00026  |
| BCHE    | -0.10654 | 0.156925 | 0.245125 |
| BCKDHA  | -0.16198 | 0.030757 | 0.063999 |
| BCKDHB  | -0.28925 | 9.01E-05 | 0.000434 |
| BCKDK   | 0.187818 | 0.012055 | 0.028985 |
| BCL10   | 0.437761 | 9.93E-10 | 2.11E-08 |
| BCL11A  | -0.31262 | 2.15E-05 | 0.000126 |
| BCL11B  | 0.182242 | 0.014904 | 0.034651 |
| BCL2A1  | 0.190937 | 0.01068  | 0.026136 |
| BCL2L10 | -0.08861 | 0.23952  | 0.343827 |
| BCL2L11 | -0.23528 | 0.00157  | 0.00507  |
| BCL2L12 | 0.412631 | 1.04E-08 | 1.64E-07 |
| BCL2L13 | -0.18539 | 0.013231 | 0.031354 |
| BCL2L14 | 0.403956 | 2.25E-08 | 3.18E-07 |
| BCL2L15 | 0.506583 | 5.41E-13 | 2.70E-11 |
| BCL2L1  | 0.513224 | 2.39E-13 | 1.30E-11 |
| BCL2L2  | -0.33569 | 4.63E-06 | 3.33E-05 |
| BCL2    | -0.25094 | 0.000729 | 0.002622 |
| BCL3    | 0.313627 | 2.02E-05 | 0.000119 |
| BCL6B   | -0.19373 | 0.009568 | 0.023778 |
| BCL6    | 0.246079 | 0.00093  | 0.003224 |
| BCL7A   | -0.24201 | 0.001135 | 0.003834 |
| BCL7B   | 0.073217 | 0.331418 | 0.443551 |
| BCL7C   | 0.411421 | 1.16E-08 | 1.80E-07 |
| BCL8    | -0.12939 | 0.085192 | 0.149688 |
| BCL9L   | 0.408707 | 1.48E-08 | 2.20E-07 |
| BCL9    | -0.28738 | 0.0001   | 0.000477 |
| BCLAF1  | -0.38747 | 9.13E-08 | 1.08E-06 |
| BCM01   | 0.301331 | 4.36E-05 | 0.000234 |
| BCO2    | 0.118055 | 0.116543 | 0.192896 |
| BCORL1  | 0.00136  | 0.985621 | 0.989849 |
| BCORL2  | -0.00919 | 0.903062 | 0.932245 |
| BCOR    | -0.41775 | 6.56E-09 | 1.10E-07 |
| BCR     | 0.172316 | 0.021447 | 0.047053 |
| BCS1L   | 0.274434 | 0.00021  | 0.000901 |
| BCYRN1  | -0.04236 | 0.574548 | 0.67417  |
| BDH1    | 0.073613 | 0.328805 | 0.440754 |
| BDH2    | 0.457515 | 1.36E-10 | 3.69E-09 |
| BDKRB1  | 0.07864  | 0.296755 | 0.406649 |
| BDKRB2  | 0.022766 | 0.762928 | 0.831192 |
| BDNFOS  | -0.14056 | 0.061282 | 0.113634 |
| BDNF    | 0.148561 | 0.047807 | 0.092544 |
| BDP1    | -0.20794 | 0.005349 | 0.014505 |
| BEAN    | 0.564904 | 2.15E-16 | 2.40E-14 |
| BECN1   | 0.08133  | 0.280491 | 0.388868 |
| BEGAIN  | -0.11604 | 0.122952 | 0.201129 |
| BEND2   | -0.2348  | 0.001606 | 0.005167 |
| BEND3   | -0.42026 | 5.22E-09 | 8.98E-08 |
| BEND4   | -0.28542 | 0.000113 | 0.000528 |
| BEND5   | -0.214   | 0.004127 | 0.011632 |
| BEND6   | -0.01356 | 0.857394 | 0.900569 |
| BEND7   | 0.078986 | 0.29463  | 0.404528 |
| BEST1   | -0.18436 | 0.013758 | 0.032384 |
| BEST2   | -0.07351 | 0.329496 | 0.441516 |

|         |          |          |          |
|---------|----------|----------|----------|
| BEST3   | 0.046762 | 0.535369 | 0.639005 |
| BEST4   | 0.411799 | 1.12E-08 | 1.75E-07 |
| BET1L   | -0.01953 | 0.795858 | 0.855892 |
| BET1    | -0.1924  | 0.010084 | 0.024875 |
| BET3L   | 0.026248 | 0.727997 | 0.803091 |
| BEX1    | -0.23275 | 0.00177  | 0.005619 |
| BEX2    | -0.30454 | 3.58E-05 | 0.000196 |
| BEX4    | -0.32534 | 9.37E-06 | 6.14E-05 |
| BEX5    | -0.21458 | 0.004024 | 0.011385 |
| BFAR    | 0.365982 | 5.07E-07 | 4.81E-06 |
| BFSP1   | 0.015948 | 0.832665 | 0.881242 |
| BFSP2   | -0.03924 | 0.60306  | 0.699203 |
| BGLAP   | 0.043801 | 0.561555 | 0.662466 |
| BGN     | 0.241663 | 0.001155 | 0.003891 |
| BHLHA15 | -0.25884 | 0.000485 | 0.001855 |
| BHLHB9  | -0.49288 | 2.77E-12 | 1.16E-10 |
| BHLHE22 | -0.12249 | 0.103332 | 0.175359 |
| BHLHE23 | 0.052797 | 0.483976 | 0.593019 |
| BHLHE40 | 0.449442 | 3.11E-10 | 7.72E-09 |
| BHLHE41 | 0.210688 | 0.004759 | 0.013133 |
| BHMT2   | -0.04444 | 0.555854 | 0.657345 |
| BHMT    | -0.15171 | 0.043233 | 0.085139 |
| BICC1   | 0.059196 | 0.432511 | 0.544293 |
| BICD1   | 0.102187 | 0.174689 | 0.26703  |
| BICD2   | -0.12936 | 0.085269 | 0.149771 |
| BID     | 0.369719 | 3.79E-07 | 3.75E-06 |
| BIK     | 0.574675 | 4.95E-17 | 6.80E-15 |
| BIN1    | 0.225678 | 0.002455 | 0.007443 |
| BIN2    | 0.002639 | 0.972114 | 0.981223 |
| BIN3    | 0.359371 | 8.38E-07 | 7.44E-06 |
| BIRC2   | 0.06543  | 0.385543 | 0.498292 |
| BIRC3   | 0.391476 | 6.54E-08 | 8.04E-07 |
| BIRC5   | 0.372518 | 3.05E-07 | 3.10E-06 |
| BIRC6   | -0.19383 | 0.009529 | 0.023692 |
| BIRC7   | 0.510834 | 3.21E-13 | 1.71E-11 |
| BIRC8   | 0.097845 | 0.19383  | 0.290341 |
| BIVM    | -0.21601 | 0.003781 | 0.010784 |
| BLCAP   | 0.253355 | 0.000644 | 0.002354 |
| BLID    | 0.117117 | 0.119497 | 0.196777 |
| BLK     | -0.06269 | 0.405771 | 0.51826  |
| BLMH    | -0.41514 | 8.32E-09 | 1.35E-07 |
| BLM     | 0.0818   | 0.27771  | 0.385852 |
| BLNK    | 0.19416  | 0.009406 | 0.023431 |
| BLOC1S1 | 0.069047 | 0.359766 | 0.47288  |
| BLOC1S2 | -0.01536 | 0.838792 | 0.886209 |
| BLOC1S3 | 0.176865 | 0.018191 | 0.040965 |
| BLVRA   | 0.154727 | 0.039188 | 0.078353 |
| BLVRB   | 0.514755 | 1.97E-13 | 1.09E-11 |
| BLZF1   | 0.329856 | 6.91E-06 | 4.70E-05 |
| BMF     | -0.03723 | 0.621788 | 0.715838 |
| BMI1    | -0.2028  | 0.00663  | 0.017434 |
| BMP10   | -0.08734 | 0.24632  | 0.351247 |
| BMP15   | -0.06847 | 0.363828 | 0.47711  |
| BMP1    | 0.331586 | 6.15E-06 | 4.27E-05 |

|        |          |          |          |
|--------|----------|----------|----------|
| BMP2K  | -0.19047 | 0.010878 | 0.026552 |
| BMP2   | 0.252674 | 0.000667 | 0.002425 |
| BMP3   | 0.104664 | 0.164414 | 0.254431 |
| BMP4   | 0.513851 | 2.21E-13 | 1.21E-11 |
| BMP5   | -0.13472 | 0.07299  | 0.131653 |
| BMP6   | -0.36382 | 5.98E-07 | 5.55E-06 |
| BMP7   | 0.076784 | 0.308339 | 0.418783 |
| BMP8A  | 0.132231 | 0.078495 | 0.139972 |
| BMP8B  | -0.02959 | 0.695004 | 0.776617 |
| BMPER  | -0.30807 | 2.87E-05 | 0.000162 |
| BMPR1A | -0.1742  | 0.020046 | 0.044483 |
| BMPR1B | 0.099918 | 0.184506 | 0.278697 |
| BMPR2  | 0.01648  | 0.827169 | 0.877588 |
| BMS1P4 | -0.05088 | 0.49997  | 0.607162 |
| BMS1P5 | 0.096542 | 0.19986  | 0.297605 |
| BMS1   | 0.17892  | 0.016867 | 0.038448 |
| BMX    | 0.056115 | 0.456886 | 0.56792  |
| BNC1   | -0.22461 | 0.002576 | 0.007757 |
| BNC2   | 0.06454  | 0.392053 | 0.50475  |
| BNIP1  | -0.19805 | 0.008049 | 0.020556 |
| BNIP2  | 0.231243 | 0.001899 | 0.005965 |
| BNIP3L | 0.051399 | 0.49564  | 0.603534 |
| BNIP3  | -0.37272 | 3.00E-07 | 3.06E-06 |
| BNIPL  | 0.067067 | 0.373742 | 0.486817 |
| BOC    | -0.13275 | 0.077315 | 0.138155 |
| BOD1L  | -0.24573 | 0.000946 | 0.003272 |
| BOD1   | -0.22414 | 0.002632 | 0.007894 |
| BOK    | 0.42395  | 3.70E-09 | 6.68E-08 |
| BOLA1  | 0.11715  | 0.119391 | 0.196687 |
| BOLA2  | 0.345262 | 2.36E-06 | 1.84E-05 |
| BOLA3  | 0.085284 | 0.257684 | 0.364012 |
| BOLL   | -0.04686 | 0.534492 | 0.638151 |
| BOP1   | 0.131995 | 0.079033 | 0.140705 |
| BPESC1 | 0.031292 | 0.678398 | 0.763671 |
| BPGM   | 0.065754 | 0.38319  | 0.496052 |
| BPHL   | -0.00877 | 0.907472 | 0.935531 |
| BPIL1  | -0.1732  | 0.020777 | 0.045833 |
| BPIL2  | -0.03516 | 0.641257 | 0.732325 |
| BPI    | 0.249339 | 0.00079  | 0.002816 |
| BPNT1  | 0.399788 | 3.23E-08 | 4.33E-07 |
| BPTF   | -0.39587 | 4.51E-08 | 5.82E-07 |
| BPY2   | 0.067825 | 0.368358 | 0.481867 |
| BRAF   | -0.14888 | 0.047329 | 0.091815 |
| BRAP   | -0.35841 | 9.00E-07 | 7.92E-06 |
| BRCA1  | 0.08304  | 0.270468 | 0.378261 |
| BRCA2  | 0.159635 | 0.033299 | 0.06841  |
| BRCC3  | 0.096882 | 0.198271 | 0.295694 |
| BRD1   | -0.19558 | 0.008888 | 0.022295 |
| BRD2   | -0.32235 | 1.14E-05 | 7.31E-05 |
| BRD3   | -0.27939 | 0.000159 | 0.000711 |
| BRD4   | -0.05964 | 0.429097 | 0.54108  |
| BRD7P3 | -0.08228 | 0.274871 | 0.382795 |
| BRD7   | 0.084589 | 0.261601 | 0.368414 |
| BRD8   | -0.31035 | 2.49E-05 | 0.000143 |

|        |          |          |          |
|--------|----------|----------|----------|
| BRD9   | 0.083858 | 0.265758 | 0.373205 |
| BRDT   | -0.1434  | 0.056188 | 0.105866 |
| BREA2  | 0.217923 | 0.003476 | 0.010006 |
| BRE    | 0.192576 | 0.010014 | 0.024729 |
| BRF1   | -0.17806 | 0.01741  | 0.039481 |
| BRF2   | -0.06736 | 0.371662 | 0.484683 |
| BRI3BP | -0.09942 | 0.186706 | 0.281482 |
| BRI3   | 0.463333 | 7.39E-11 | 2.15E-09 |
| BRIP1  | 0.128723 | 0.08682  | 0.152021 |
| BRIX1  | 0.060992 | 0.418654 | 0.530943 |
| BRMS1L | -0.28776 | 9.83E-05 | 0.000468 |
| BRMS1  | 0.303568 | 3.80E-05 | 0.000207 |
| BRP44L | -0.19782 | 0.008125 | 0.020716 |
| BRP44  | -0.09622 | 0.20135  | 0.299428 |
| BRPF1  | -0.11516 | 0.125839 | 0.205114 |
| BRPF3  | -0.4674  | 4.79E-11 | 1.48E-09 |
| BRS3   | -0.18762 | 0.012149 | 0.029165 |
| BRSK1  | -0.21045 | 0.004808 | 0.013249 |
| BRSK2  | -0.40253 | 2.55E-08 | 3.54E-07 |
| BRWD1  | -0.15552 | 0.038178 | 0.07662  |
| BRWD3  | -0.10342 | 0.169523 | 0.260786 |
| BSCL2  | -0.14737 | 0.049639 | 0.095427 |
| BSDC1  | -0.24438 | 0.001011 | 0.003465 |
| BSG    | 0.169243 | 0.023921 | 0.051678 |
| BSND   | -0.04692 | 0.533957 | 0.637805 |
| BSN    | -0.40605 | 1.87E-08 | 2.71E-07 |
| BSPRY  | 0.02825  | 0.708166 | 0.787453 |
| BST1   | 0.241297 | 0.001176 | 0.003946 |
| BST2   | 0.399082 | 3.43E-08 | 4.57E-07 |
| BSX    | 0.018461 | 0.80678  | 0.86322  |
| BTAF1  | -0.16425 | 0.028463 | 0.05987  |
| BTBD10 | 0.451946 | 2.41E-10 | 6.10E-09 |
| BTBD11 | -0.08746 | 0.245684 | 0.350541 |
| BTBD12 | -0.13111 | 0.081075 | 0.143796 |
| BTBD16 | 0.446766 | 4.08E-10 | 9.73E-09 |
| BTBD17 | -0.28075 | 0.000147 | 0.000665 |
| BTBD18 | -0.09212 | 0.221348 | 0.323284 |
| BTBD19 | 0.088189 | 0.241768 | 0.346253 |
| BTBD1  | -0.19865 | 0.007857 | 0.020117 |
| BTBD2  | 0.119849 | 0.111055 | 0.18596  |
| BTBD3  | -0.52306 | 6.88E-14 | 4.22E-12 |
| BTBD6  | -0.19313 | 0.009798 | 0.024268 |
| BTBD7  | -0.15423 | 0.039833 | 0.079401 |
| BTBD8  | -0.14993 | 0.045764 | 0.08927  |
| BTBD9  | -0.41079 | 1.23E-08 | 1.88E-07 |
| BTC    | -0.06231 | 0.40863  | 0.520803 |
| BTD    | -0.19925 | 0.007667 | 0.0197   |
| BTF3L1 | 0.044197 | 0.558018 | 0.659161 |
| BTF3L4 | -0.16707 | 0.025811 | 0.055111 |
| BTF3   | 0.288007 | 9.68E-05 | 0.000462 |
| BTG1   | -0.29062 | 8.31E-05 | 0.000404 |
| BTG2   | -0.26977 | 0.000271 | 0.001124 |
| BTG3   | 0.087978 | 0.242901 | 0.347574 |
| BTG4   | 0.119313 | 0.112673 | 0.188017 |

|           |          |          |          |
|-----------|----------|----------|----------|
| BTK       | 0.069393 | 0.357359 | 0.470529 |
| BTLA      | -0.12862 | 0.087081 | 0.152357 |
| BTN1A1    | 0.018663 | 0.804702 | 0.861887 |
| BTN2A1    | 0.004703 | 0.950318 | 0.966397 |
| BTN2A2    | 0.012408 | 0.869429 | 0.909971 |
| BTN2A3    | 0.234116 | 0.001659 | 0.005319 |
| BTN3A1    | 0.042721 | 0.571253 | 0.671139 |
| BTN3A2    | 0.105146 | 0.16247  | 0.25198  |
| BTN3A3    | 0.032943 | 0.662452 | 0.750849 |
| BTNL2     | -0.11672 | 0.120759 | 0.198297 |
| BTNL3     | 0.161271 | 0.03151  | 0.065245 |
| BTNL8     | 0.181206 | 0.015494 | 0.0358   |
| BTNL9     | -0.17568 | 0.018998 | 0.04252  |
| BTRC      | -0.40223 | 2.61E-08 | 3.61E-07 |
| BUB1B     | 0.357672 | 9.51E-07 | 8.29E-06 |
| BUB1      | 0.342559 | 2.86E-06 | 2.18E-05 |
| BUB3      | 0.21887  | 0.003333 | 0.009655 |
| BUD13     | 0.110567 | 0.141761 | 0.225769 |
| BUD31     | 0.186152 | 0.012851 | 0.030591 |
| BVES      | -0.32528 | 9.41E-06 | 6.16E-05 |
| BYSL      | -0.03582 | 0.63502  | 0.726714 |
| BZRAP1    | -0.191   | 0.010653 | 0.026078 |
| BZW1      | 0.213834 | 0.004157 | 0.011697 |
| BZW2      | 0.335923 | 4.56E-06 | 3.28E-05 |
| C10orf105 | -0.15519 | 0.038597 | 0.077327 |
| C10orf107 | -0.09073 | 0.228402 | 0.331286 |
| C10orf108 | -0.0598  | 0.427841 | 0.539962 |
| C10orf10  | 0.028268 | 0.70799  | 0.787346 |
| C10orf110 | 0.095086 | 0.206759 | 0.306022 |
| C10orf111 | -0.22578 | 0.002443 | 0.00741  |
| C10orf113 | 0.114165 | 0.12917  | 0.20943  |
| C10orf114 | -0.1153  | 0.125389 | 0.204473 |
| C10orf116 | 0.430467 | 2.01E-09 | 3.87E-08 |
| C10orf118 | -0.21067 | 0.004764 | 0.013144 |
| C10orf119 | 0.04917  | 0.514545 | 0.620555 |
| C10orf11  | 0.020806 | 0.782809 | 0.845815 |
| C10orf120 | -0.18451 | 0.013682 | 0.032254 |
| C10orf125 | 0.207903 | 0.005357 | 0.01452  |
| C10orf128 | -0.08329 | 0.269042 | 0.376666 |
| C10orf129 | -0.19526 | 0.009002 | 0.022538 |
| C10orf12  | 0.141979 | 0.058694 | 0.109584 |
| C10orf131 | -0.1139  | 0.130072 | 0.210581 |
| C10orf137 | -0.27805 | 0.000171 | 0.000758 |
| C10orf140 | -0.28782 | 9.79E-05 | 0.000466 |
| C10orf18  | -0.22156 | 0.002957 | 0.008741 |
| C10orf25  | -0.1665  | 0.026332 | 0.056085 |
| C10orf26  | 0.10889  | 0.14794  | 0.2336   |
| C10orf27  | 0.013253 | 0.860621 | 0.903095 |
| C10orf28  | 0.118512 | 0.115126 | 0.191111 |
| C10orf2   | -0.13295 | 0.076875 | 0.137502 |
| C10orf32  | -0.29817 | 5.29E-05 | 0.000275 |
| C10orf35  | 0.058118 | 0.440958 | 0.552742 |
| C10orf40  | 0.024709 | 0.743373 | 0.815142 |
| C10orf41  | -0.01455 | 0.847096 | 0.892502 |



|          |          |          |          |
|----------|----------|----------|----------|
| C10orf46 | 0.051548 | 0.494389 | 0.602564 |
| C10orf47 | 0.464461 | 6.55E-11 | 1.95E-09 |
| C10orf4  | -0.13511 | 0.072162 | 0.13054  |
| C10orf50 | -0.00534 | 0.94361  | 0.961999 |
| C10orf53 | -0.31436 | 1.93E-05 | 0.000115 |
| C10orf54 | 0.233959 | 0.001671 | 0.005349 |
| C10orf55 | 0.440006 | 7.97E-10 | 1.74E-08 |
| C10orf57 | 0.041361 | 0.583573 | 0.682169 |
| C10orf58 | 0.118574 | 0.114936 | 0.190859 |
| C10orf62 | -0.09174 | 0.223275 | 0.325449 |
| C10orf67 | 0.022037 | 0.770306 | 0.836557 |
| C10orf68 | -0.12319 | 0.101382 | 0.172569 |
| C10orf71 | -0.2599  | 0.000459 | 0.001765 |
| C10orf72 | -0.01094 | 0.884811 | 0.919946 |
| C10orf75 | -0.24016 | 0.001243 | 0.004144 |
| C10orf76 | -0.18477 | 0.013545 | 0.031992 |
| C10orf78 | 0.413225 | 9.89E-09 | 1.56E-07 |
| C10orf79 | -0.21557 | 0.003854 | 0.010959 |
| C10orf81 | 0.232692 | 0.001774 | 0.005629 |
| C10orf82 | -0.07606 | 0.312962 | 0.423841 |
| C10orf84 | -0.00686 | 0.927539 | 0.949925 |
| C10orf88 | -0.258   | 0.000507 | 0.001924 |
| C10orf90 | -0.05328 | 0.479953 | 0.589504 |
| C10orf91 | 0.291566 | 7.86E-05 | 0.000385 |
| C10orf93 | -0.26797 | 0.000299 | 0.001224 |
| C10orf95 | 0.100778 | 0.180739 | 0.27418  |
| C10orf96 | 0.077306 | 0.305053 | 0.415484 |
| C10orf99 | 0.247247 | 0.000877 | 0.003073 |
| C11orf10 | 0.161089 | 0.031706 | 0.065565 |
| C11orf16 | -0.15853 | 0.034549 | 0.070496 |
| C11orf17 | 0.18426  | 0.013811 | 0.032485 |
| C11orf1  | 0.277108 | 0.000181 | 0.000792 |
| C11orf20 | 0.040961 | 0.587226 | 0.685697 |
| C11orf21 | -0.06246 | 0.407559 | 0.519772 |
| C11orf24 | 0.141711 | 0.059178 | 0.11029  |
| C11orf2  | -0.05427 | 0.471844 | 0.581835 |
| C11orf30 | -0.22958 | 0.002052 | 0.00637  |
| C11orf31 | 0.306714 | 3.13E-05 | 0.000175 |
| C11orf34 | -0.05299 | 0.482354 | 0.591599 |
| C11orf35 | 0.241916 | 0.001141 | 0.003851 |
| C11orf36 | -0.19512 | 0.009053 | 0.022652 |
| C11orf41 | 0.229409 | 0.002068 | 0.006414 |
| C11orf42 | 0.001184 | 0.987491 | 0.99115  |
| C11orf45 | 0.131606 | 0.079929 | 0.142107 |
| C11orf46 | -0.26086 | 0.000437 | 0.001693 |
| C11orf48 | 0.341875 | 3.00E-06 | 2.27E-05 |
| C11orf49 | 0.122658 | 0.10287  | 0.174696 |
| C11orf51 | -0.02    | 0.790976 | 0.852079 |
| C11orf52 | 0.127655 | 0.089492 | 0.155667 |
| C11orf53 | 0.249661 | 0.000777 | 0.002778 |
| C11orf54 | 0.074127 | 0.325428 | 0.437518 |
| C11orf57 | -0.05765 | 0.44465  | 0.556266 |
| C11orf58 | -0.2812  | 0.000143 | 0.000651 |
| C11orf59 | 0.255574 | 0.000575 | 0.002142 |

C11orf61 0.133118 0.076495 0.136974  
C11orf63 0.031483 0.676549 0.76237  
C11orf65 -0.10142 0.177982 0.270807  
C11orf66 0.039166 0.603723 0.699849  
C11orf67 0.267585 0.000305 0.001245  
C11orf68 0.38536 1.09E-07 1.25E-06  
C11orf70 0.052352 0.487668 0.596361  
C11orf71 -0.17627 0.018592 0.041726  
C11orf73 0.269917 0.000269 0.001116  
C11orf74 0.17921 0.016687 0.03813  
C11orf75 0.190086 0.011041 0.026884  
C11orf80 0.515394 1.82E-13 1.02E-11  
C11orf82 0.258545 0.000493 0.00188  
C11orf83 0.23636 0.001491 0.004843  
C11orf84 -0.11695 0.120024 0.197401  
C11orf85 -0.00667 0.92959 0.951325  
C11orf86 0.555619 8.29E-16 7.80E-14  
C11orf87 -0.03572 0.635946 0.727563  
C11orf88 -0.054 0.474063 0.583839  
C11orf90 0.259737 0.000463 0.001777  
C11orf92 0.060191 0.424802 0.537052  
C11orf93 0.087237 0.246909 0.351985  
C11orf94 -0.00487 0.948523 0.965182  
C11orf95 -0.22341 0.002721 0.008127  
C11orf9 0.451314 2.57E-10 6.47E-09  
C12orf10 -0.05978 0.427945 0.540024  
C12orf11 -0.02909 0.699912 0.780777  
C12orf12 -0.05845 0.438381 0.550105  
C12orf23 -0.41392 9.29E-09 1.48E-07  
C12orf24 -0.33723 4.16E-06 3.03E-05  
C12orf26 -0.23413 0.001658 0.005316  
C12orf27 -0.08599 0.25376 0.359925  
C12orf29 -0.39445 5.09E-08 6.48E-07  
C12orf32 -0.02246 0.766021 0.833335  
C12orf34 -0.50545 6.21E-13 3.01E-11  
C12orf35 0.250864 0.000731 0.002631  
C12orf36 0.512267 2.69E-13 1.45E-11  
C12orf39 -0.33443 5.06E-06 3.60E-05  
C12orf40 0.006811 0.928101 0.950205  
C12orf41 -0.27188 0.000241 0.001016  
C12orf42 -0.24178 0.001149 0.003873  
C12orf43 -0.12418 0.098624 0.168659  
C12orf44 -0.06048 0.422587 0.5348  
C12orf45 0.22207 0.00289 0.008567  
C12orf47 0.119755 0.111336 0.186322  
C12orf48 0.135061 0.072258 0.130671  
C12orf49 -0.09498 0.207273 0.306622  
C12orf4 -0.26784 0.000301 0.00123  
C12orf50 -0.09674 0.198945 0.296543  
C12orf51 -0.33655 4.36E-06 3.16E-05  
C12orf52 -0.24896 0.000805 0.002862  
C12orf53 0.092084 0.221518 0.323484  
C12orf54 0.020354 0.787413 0.849295  
C12orf56 0.307545 2.97E-05 0.000167

|           |          |          |          |
|-----------|----------|----------|----------|
| C12orf57  | -0.21661 | 0.003683 | 0.010534 |
| C12orf59  | 0.097097 | 0.197273 | 0.294469 |
| C12orf5   | -0.14862 | 0.047716 | 0.092387 |
| C12orf60  | -0.1291  | 0.085889 | 0.150631 |
| C12orf61  | -0.11963 | 0.111705 | 0.186812 |
| C12orf62  | -0.12166 | 0.105718 | 0.178688 |
| C12orf63  | -0.28546 | 0.000112 | 0.000527 |
| C12orf65  | -0.3761  | 2.29E-07 | 2.42E-06 |
| C12orf66  | -0.27215 | 0.000238 | 0.001005 |
| C12orf68  | -0.11913 | 0.11324  | 0.188692 |
| C12orf69  | -0.04595 | 0.542498 | 0.645565 |
| C12orf70  | 0.432132 | 1.71E-09 | 3.38E-08 |
| C12orf71  | -0.0694  | 0.357283 | 0.470461 |
| C12orf72  | -0.36307 | 6.33E-07 | 5.85E-06 |
| C12orf73  | -0.16959 | 0.023633 | 0.05118  |
| C12orf74  | -0.13361 | 0.075403 | 0.135387 |
| C12orf75  | 0.055555 | 0.461402 | 0.5717   |
| C12orf76  | -0.23493 | 0.001597 | 0.005145 |
| C12orf77  | -0.01214 | 0.872265 | 0.911637 |
| C13orf15  | -0.08558 | 0.25605  | 0.362455 |
| C13orf16  | 0.095019 | 0.207082 | 0.306431 |
| C13orf18  | -0.03514 | 0.641416 | 0.732422 |
| C13orf1   | -0.04562 | 0.545366 | 0.64812  |
| C13orf23  | 0.01601  | 0.832023 | 0.881025 |
| C13orf26  | -0.0475  | 0.528904 | 0.63354  |
| C13orf27  | -0.12633 | 0.092891 | 0.160506 |
| C13orf29  | 0.230254 | 0.001988 | 0.0062   |
| C13orf30  | -0.08731 | 0.246536 | 0.351528 |
| C13orf31  | 0.032665 | 0.665119 | 0.752881 |
| C13orf33  | -0.16925 | 0.023915 | 0.051674 |
| C13orf34  | 0.26773  | 0.000303 | 0.001236 |
| C13orf35  | -0.07402 | 0.32616  | 0.438174 |
| C13orf36  | -0.25013 | 0.000759 | 0.002719 |
| C13orf37  | 0.150291 | 0.045242 | 0.088471 |
| C13orf38  | 0.040422 | 0.592153 | 0.689509 |
| C13orf39  | -0.02588 | 0.731647 | 0.805959 |
| C14orf101 | -0.2507  | 0.000737 | 0.00265  |
| C14orf102 | -0.36185 | 6.94E-07 | 6.35E-06 |
| C14orf104 | -0.27634 | 0.000189 | 0.000823 |
| C14orf105 | 0.196476 | 0.008576 | 0.021662 |
| C14orf106 | -0.10092 | 0.180108 | 0.27347  |
| C14orf109 | -0.18918 | 0.011436 | 0.027699 |
| C14orf115 | 0.09999  | 0.184189 | 0.278366 |
| C14orf118 | -0.03699 | 0.623959 | 0.71771  |
| C14orf119 | 0.364118 | 5.84E-07 | 5.45E-06 |
| C14orf126 | -0.3311  | 6.35E-06 | 4.38E-05 |
| C14orf128 | 0.083175 | 0.269686 | 0.377407 |
| C14orf129 | 0.254726 | 0.000601 | 0.002219 |
| C14orf132 | -0.34817 | 1.91E-06 | 1.53E-05 |
| C14orf135 | -0.20983 | 0.004937 | 0.013549 |
| C14orf138 | 0.038023 | 0.614334 | 0.709445 |
| C14orf139 | -0.18874 | 0.011632 | 0.028092 |
| C14orf142 | -0.22334 | 0.00273  | 0.008149 |
| C14orf143 | 0.149602 | 0.04625  | 0.090021 |

C14orf145 -0.14564 0.052417 0.099855  
C14orf147 -0.15892 0.03411 0.069774  
C14orf148 -0.19532 0.008983 0.0225  
C14orf149 0.002386 0.974786 0.982687  
C14orf153 0.117979 0.11678 0.193175  
C14orf156 0.14152 0.059525 0.110864  
C14orf159 0.16975 0.023497 0.050913  
C14orf162 -0.19816 0.008014 0.020472  
C14orf165 -0.03041 0.686953 0.770463  
C14orf166 -0.17334 0.02067 0.045653  
C14orf166 0.25306 0.000654 0.002383  
C14orf167 -0.18335 0.014296 0.033458  
C14orf169 -0.06355 0.399372 0.511873  
C14orf174 -0.35938 8.37E-07 7.43E-06  
C14orf176 0.32115 1.24E-05 7.83E-05  
C14orf178 -0.27785 0.000173 0.000765  
C14orf179 0.068986 0.360198 0.473298  
C14orf180 -0.24807 0.000842 0.002964  
C14orf181 0.191288 0.010534 0.025831  
C14orf182 0.296876 5.72E-05 0.000294  
C14orf183 0.01869 0.804429 0.861689  
C14orf184 0.196157 0.008686 0.021891  
C14orf19 -0.04642 0.53839 0.64172  
C14orf1 0.281181 0.000144 0.000652  
C14orf21 -0.1585 0.034592 0.070576  
C14orf23 0.081278 0.280797 0.38921  
C14orf28 -0.00636 0.932859 0.953842  
C14orf2 0.01476 0.84497 0.89069  
C14orf33 -0.13916 0.063948 0.117815  
C14orf34 0.452902 2.19E-10 5.59E-09  
C14orf37 -0.13859 0.065054 0.119563  
C14orf39 -0.19411 0.009423 0.023471  
C14orf43 0.034958 0.643184 0.73379  
C14orf45 -0.25769 0.000515 0.00195  
C14orf48 -0.13954 0.063212 0.116676  
C14orf49 -0.06842 0.364175 0.477438  
C14orf4 -0.29589 6.07E-05 0.000309  
C14orf50 0.266594 0.000322 0.001304  
C14orf53 -0.1454 0.052806 0.10047  
C14orf64 -0.20886 0.005145 0.014033  
C14orf68 -0.09879 0.18955 0.284997  
C14orf70 -0.12938 0.085209 0.149704  
C14orf72 0.024958 0.740882 0.813132  
C14orf73 0.479572 1.26E-11 4.38E-10  
C14orf79 0.053735 0.476228 0.585815  
C14orf80 0.252191 0.000684 0.00248  
C14orf86 -0.00717 0.924345 0.947636  
C14orf93 -0.23628 0.001497 0.004859  
C15orf17 -0.07479 0.321085 0.432915  
C15orf21 0.005547 0.941418 0.960656  
C15orf23 0.220512 0.003099 0.009082  
C15orf24 0.061432 0.415304 0.527608  
C15orf26 -0.42138 4.70E-09 8.21E-08  
C15orf27 -0.1108 0.140931 0.224704

C15orf28 0.015311 0.83925 0.886503  
C15orf29 0.20613 0.005772 0.01547  
C15orf2 -0.22217 0.002877 0.008532  
C15orf32 0.026175 0.728724 0.803535  
C15orf33 -0.41104 1.20E-08 1.85E-07  
C15orf34 -0.06898 0.360204 0.473298  
C15orf37 -0.20664 0.00565 0.015186  
C15orf38 -0.13644 0.06936 0.126256  
C15orf39 0.206373 0.005714 0.015338  
C15orf40 -0.06684 0.375369 0.48839  
C15orf41 0.186087 0.012883 0.030649  
C15orf42 0.303871 3.73E-05 0.000203  
C15orf43 0.006504 0.931336 0.9527  
C15orf44 0.013406 0.859035 0.901896  
C15orf48 0.372015 3.17E-07 3.21E-06  
C15orf50 -0.36047 7.71E-07 6.95E-06  
C15orf51 -0.02782 0.712413 0.790841  
C15orf52 0.505156 6.44E-13 3.11E-11  
C15orf53 -0.10814 0.150752 0.237263  
C15orf54 -0.06998 0.353288 0.466132  
C15orf55 0.241624 0.001157 0.003897  
C15orf56 -0.01981 0.792973 0.853367  
C15orf57 0.209512 0.005004 0.013706  
C15orf58 0.156153 0.037393 0.075314  
C15orf59 -0.11862 0.114783 0.190676  
C15orf5 0.099919 0.184503 0.278697  
C15orf60 -0.0119 0.87471 0.913116  
C15orf61 -0.27716 0.00018 0.000791  
C15orf62 0.324423 9.96E-06 6.47E-05  
C15orf63 0.142912 0.057036 0.107056  
C16orf11 -0.19338 0.009703 0.024074  
C16orf13 0.263245 0.000385 0.001519  
C16orf3 -0.00967 0.89802 0.928937  
C16orf42 0.245733 0.000946 0.003272  
C16orf45 -0.02556 0.734872 0.808356  
C16orf46 0.025397 0.736489 0.809602  
C16orf48 0.178287 0.017266 0.039217  
C16orf52 -0.07256 0.335791 0.447978  
C16orf53 -0.09949 0.186423 0.28112  
C16orf54 -0.14263 0.057536 0.107871  
C16orf55 0.126747 0.091813 0.159018  
C16orf57 0.482283 9.32E-12 3.37E-10  
C16orf58 0.036385 0.629681 0.722318  
C16orf59 0.226786 0.002333 0.007126  
C16orf5 -0.46748 4.75E-11 1.47E-09  
C16orf61 0.151745 0.043177 0.085055  
C16orf62 -0.05192 0.491298 0.599872  
C16orf63 -0.23459 0.001623 0.005215  
C16orf68 -0.02831 0.70758 0.787067  
C16orf70 -0.05499 0.465968 0.576094  
C16orf71 -0.18457 0.013649 0.0322  
C16orf72 -0.08943 0.235164 0.339129  
C16orf73 -0.22617 0.0024 0.007296  
C16orf74 0.368827 4.07E-07 3.98E-06

C16orf75 0.353368 1.31E-06 1.09E-05  
C16orf78 0.004146 0.956193 0.969977  
C16orf79 0.059212 0.432389 0.544174  
C16orf7 0.291711 7.79E-05 0.000382  
C16orf80 -0.03803 0.614301 0.709445  
C16orf81 0.01092 0.884972 0.920055  
C16orf82 -0.04885 0.517313 0.623234  
C16orf86 0.102024 0.17538 0.267796  
C16orf87 0.14346 0.056081 0.105715  
C16orf88 0.311021 2.38E-05 0.000138  
C16orf89 -0.10644 0.157313 0.245634  
C16orf90 -0.16438 0.028336 0.059653  
C16orf91 0.145936 0.051928 0.099085  
C16orf92 -0.22669 0.002343 0.007149  
C16orf93 0.121324 0.106697 0.180111  
C17orf10C -0.1975 0.008231 0.020925  
C17orf101 -0.27711 0.000181 0.000792  
C17orf102 -0.0991 0.188154 0.283255  
C17orf103 -0.32805 7.81E-06 5.24E-05  
C17orf104 -0.03125 0.678835 0.763775  
C17orf105 -0.07244 0.336609 0.448857  
C17orf106 0.17757 0.017727 0.040102  
C17orf107 -0.40701 1.72E-08 2.51E-07  
C17orf108 -0.24638 0.000916 0.003183  
C17orf28 -0.00957 0.899067 0.929528  
C17orf37 0.204075 0.006289 0.016649  
C17orf39 -0.43098 1.91E-09 3.70E-08  
C17orf42 0.048358 0.521521 0.627094  
C17orf44 -0.15304 0.041403 0.082067  
C17orf46 0.082273 0.274933 0.382853  
C17orf47 0.11372 0.130677 0.211336  
C17orf48 -0.14748 0.049464 0.095156  
C17orf49 0.022503 0.765588 0.833031  
C17orf50 0.393119 5.70E-08 7.13E-07  
C17orf51 -0.52124 8.69E-14 5.20E-12  
C17orf53 0.34067 3.27E-06 2.46E-05  
C17orf54 -0.26211 0.000409 0.0016  
C17orf55 0.353481 1.30E-06 1.09E-05  
C17orf56 0.133052 0.076642 0.137188  
C17orf57 0.087592 0.24498 0.349863  
C17orf58 -0.1989 0.007777 0.019933  
C17orf59 -0.16732 0.025587 0.054698  
C17orf60 0.274383 0.00021 0.000903  
C17orf61 -0.04731 0.530625 0.634951  
C17orf62 0.095848 0.203125 0.301773  
C17orf63 0.391746 6.39E-08 7.88E-07  
C17orf64 -0.05595 0.458251 0.568901  
C17orf65 0.020351 0.787447 0.849295  
C17orf66 -0.06438 0.393223 0.505861  
C17orf67 0.148657 0.047661 0.092316  
C17orf68 -0.43554 1.23E-09 2.52E-08  
C17orf69 0.007623 0.919557 0.944279  
C17orf70 0.088748 0.238783 0.342942  
C17orf71 -0.29577 6.12E-05 0.000311

C17orf72 -0.11283 0.133739 0.21539  
C17orf73 0.281747 0.000139 0.000634  
C17orf74 0.001137 0.987977 0.991388  
C17orf75 -0.15687 0.036519 0.073867  
C17orf76 -0.23923 0.001299 0.004306  
C17orf77 0.188744 0.011631 0.028092  
C17orf78 0.006252 0.933991 0.954654  
C17orf79 -0.14922 0.04682 0.090927  
C17orf80 -0.41819 6.31E-09 1.06E-07  
C17orf81 -0.41129 1.18E-08 1.81E-07  
C17orf82 0.281333 0.000142 0.000647  
C17orf85 -0.31688 1.64E-05 9.94E-05  
C17orf86 -0.06799 0.367203 0.480801  
C17orf87 -0.08355 0.267545 0.375128  
C17orf88 0.065059 0.388247 0.500888  
C17orf89 -0.15631 0.037203 0.075004  
C17orf90 0.143764 0.055557 0.104837  
C17orf91 -0.0352 0.640894 0.731957  
C17orf93 0.229284 0.00208 0.006449  
C17orf95 -0.089 0.237453 0.341421  
C17orf96 -0.07391 0.326859 0.438934  
C17orf97 -0.21813 0.003444 0.009932  
C17orf98 -0.05069 0.501587 0.608677  
C17orf99 0.249259 0.000793 0.002827  
C18orf10 0.041032 0.586574 0.685029  
C18orf16 -0.35368 1.28E-06 1.07E-05  
C18orf18 -0.31081 2.42E-05 0.000139  
C18orf19 0.02862 0.704518 0.784588  
C18orf1 -0.121 0.107652 0.181367  
C18orf20 -0.06301 0.403405 0.516072  
C18orf21 -0.16031 0.032552 0.067057  
C18orf22 -0.01125 0.881477 0.917683  
C18orf25 -0.31878 1.45E-05 8.95E-05  
C18orf26 -0.15969 0.033237 0.068325  
C18orf2 -0.11027 0.142834 0.227169  
C18orf32 -0.38739 9.19E-08 1.08E-06  
C18orf34 -0.33894 3.70E-06 2.73E-05  
C18orf45 0.211032 0.00469 0.012963  
C18orf54 0.007743 0.918293 0.94329  
C18orf55 -0.39953 3.30E-08 4.41E-07  
C18orf56 0.076691 0.308927 0.419302  
C18orf62 -0.0896 0.234279 0.338296  
C18orf8 0.119577 0.111875 0.187001  
C19orf10 0.07867 0.296572 0.406433  
C19orf12 -0.15508 0.038738 0.07756  
C19orf18 -0.02514 0.739032 0.811778  
C19orf20 0.072891 0.333582 0.445783  
C19orf21 0.605357 3.54E-19 8.46E-17  
C19orf22 0.353348 1.31E-06 1.10E-05  
C19orf23 -0.17871 0.017001 0.038712  
C19orf24 0.183223 0.014364 0.033589  
C19orf25 0.058566 0.437436 0.549058  
C19orf26 -0.28416 0.000121 0.000562  
C19orf28 0.05925 0.432095 0.544011

|           |          |          |          |
|-----------|----------|----------|----------|
| C19orf29  | 0.080721 | 0.28412  | 0.392991 |
| C19orf2   | -0.03759 | 0.618364 | 0.712851 |
| C19orf30  | -0.23012 | 0.002001 | 0.006234 |
| C19orf33  | 0.665961 | 3.57E-24 | 3.72E-21 |
| C19orf34  | 0.109848 | 0.144387 | 0.22905  |
| C19orf35  | -0.00842 | 0.911158 | 0.937714 |
| C19orf36  | 0.023854 | 0.751957 | 0.822184 |
| C19orf38  | 0.051353 | 0.496024 | 0.603696 |
| C19orf39  | 0.010234 | 0.892155 | 0.924896 |
| C19orf40  | 0.1563   | 0.037212 | 0.075004 |
| C19orf41  | -0.00031 | 0.996716 | 0.997537 |
| C19orf42  | 0.121741 | 0.105489 | 0.178407 |
| C19orf43  | 0.166402 | 0.026423 | 0.056242 |
| C19orf44  | -0.08555 | 0.256223 | 0.362596 |
| C19orf45  | 0.027861 | 0.712002 | 0.790507 |
| C19orf46  | 0.030414 | 0.686946 | 0.770463 |
| C19orf47  | 0.143801 | 0.055493 | 0.104765 |
| C19orf48  | 0.113774 | 0.130494 | 0.211144 |
| C19orf50  | 0.279006 | 0.000162 | 0.000724 |
| C19orf51  | 0.276035 | 0.000192 | 0.000835 |
| C19orf52  | 0.252092 | 0.000687 | 0.002491 |
| C19orf53  | 0.160997 | 0.031804 | 0.065729 |
| C19orf54  | 0.390903 | 6.86E-08 | 8.40E-07 |
| C19orf55  | -0.00034 | 0.996355 | 0.997465 |
| C19orf56  | 0.105336 | 0.161707 | 0.251028 |
| C19orf57  | 0.066847 | 0.375319 | 0.488357 |
| C19orf59  | 0.281907 | 0.000138 | 0.000629 |
| C19orf60  | 0.154119 | 0.039975 | 0.079644 |
| C19orf61  | 0.313983 | 1.97E-05 | 0.000117 |
| C19orf62  | 0.196456 | 0.008582 | 0.021669 |
| C19orf63  | -0.18655 | 0.012656 | 0.030199 |
| C19orf66  | 0.36991  | 3.74E-07 | 3.71E-06 |
| C19orf69  | -0.09325 | 0.215681 | 0.316691 |
| C19orf6   | 0.132025 | 0.078966 | 0.14061  |
| C19orf70  | 0.218951 | 0.003321 | 0.009626 |
| C19orf71  | -0.01201 | 0.87353  | 0.912573 |
| C19orf73  | -0.09565 | 0.204071 | 0.302905 |
| C19orf75  | -0.00284 | 0.969941 | 0.979502 |
| C19orf76  | -0.01153 | 0.878639 | 0.915926 |
| C19orf77  | 0.150278 | 0.045261 | 0.0885   |
| C1D       | 0.001598 | 0.983111 | 0.988159 |
| C1GALT1C1 | 0.080756 | 0.283911 | 0.392793 |
| C1GALT1   | 0.296938 | 5.70E-05 | 0.000293 |
| C1QA      | 0.058787 | 0.435702 | 0.547195 |
| C1QBP     | -0.26935 | 0.000277 | 0.001146 |
| C1QB      | 0.028412 | 0.706568 | 0.786368 |
| C1QC      | 0.017972 | 0.811803 | 0.866799 |
| C1QL1     | -0.27548 | 0.000198 | 0.000858 |
| C1QL2     | -0.1275  | 0.089872 | 0.156259 |
| C1QL3     | 0.049964 | 0.507769 | 0.614519 |
| C1QL4     | -0.1798  | 0.016328 | 0.03746  |
| C1QTNF1   | 0.020335 | 0.787608 | 0.849376 |
| C1QTNF2   | 0.060894 | 0.419407 | 0.531626 |
| C1QTNF3   | 0.236898 | 0.001454 | 0.004741 |



|          |          |          |          |
|----------|----------|----------|----------|
| C1QTNF4  | 0.003904 | 0.958754 | 0.971877 |
| C1QTNF6  | 0.257063 | 0.000532 | 0.002006 |
| C1QTNF7  | -0.03255 | 0.666269 | 0.753664 |
| C1QTNF8  | -0.13226 | 0.078436 | 0.139881 |
| C1QTNF9B | -0.18785 | 0.012038 | 0.028959 |
| C1QTNF9  | -0.29728 | 5.58E-05 | 0.000287 |
| C1RL     | 0.148727 | 0.047555 | 0.092146 |
| C1R      | 0.118123 | 0.116333 | 0.192596 |
| C1S      | 0.088237 | 0.241512 | 0.345962 |
| Clorf100 | -0.00924 | 0.902556 | 0.931917 |
| Clorf101 | -0.12769 | 0.089393 | 0.155507 |
| Clorf103 | -0.05118 | 0.497485 | 0.604961 |
| Clorf104 | 0.226273 | 0.002389 | 0.007264 |
| Clorf105 | 0.136522 | 0.069199 | 0.125998 |
| Clorf106 | 0.520757 | 9.24E-14 | 5.50E-12 |
| Clorf107 | 0.116259 | 0.122249 | 0.200179 |
| Clorf109 | -0.38483 | 1.13E-07 | 1.30E-06 |
| Clorf110 | 0.176934 | 0.018146 | 0.040881 |
| Clorf111 | -0.18616 | 0.012848 | 0.030586 |
| Clorf112 | 0.239433 | 0.001287 | 0.004272 |
| Clorf113 | 0.485137 | 6.75E-12 | 2.55E-10 |
| Clorf114 | -0.24411 | 0.001024 | 0.003505 |
| Clorf115 | 0.070006 | 0.353122 | 0.465975 |
| Clorf116 | 0.536068 | 1.25E-14 | 9.03E-13 |
| Clorf122 | -0.11123 | 0.139369 | 0.222732 |
| Clorf123 | 0.161945 | 0.030798 | 0.064031 |
| Clorf124 | -0.13966 | 0.062995 | 0.116308 |
| Clorf125 | 0.313196 | 2.07E-05 | 0.000122 |
| Clorf126 | 0.318175 | 1.50E-05 | 9.26E-05 |
| Clorf127 | -0.16195 | 0.030789 | 0.064031 |
| Clorf128 | -0.14992 | 0.04578  | 0.089284 |
| Clorf129 | 0.073185 | 0.331632 | 0.443807 |
| Clorf130 | 0.124643 | 0.097379 | 0.166933 |
| Clorf131 | 0.124708 | 0.097202 | 0.166659 |
| Clorf133 | 0.346156 | 2.21E-06 | 1.74E-05 |
| Clorf135 | 0.194963 | 0.009111 | 0.022772 |
| Clorf141 | -0.14173 | 0.059148 | 0.110273 |
| Clorf144 | -0.09041 | 0.230091 | 0.333394 |
| Clorf146 | -0.07558 | 0.31602  | 0.42731  |
| Clorf14  | -0.03772 | 0.617145 | 0.711611 |
| Clorf150 | -0.19122 | 0.010564 | 0.025894 |
| Clorf151 | 0.062786 | 0.405075 | 0.51764  |
| Clorf152 | -0.02581 | 0.732345 | 0.806381 |
| Clorf156 | 0.131843 | 0.079382 | 0.141237 |
| Clorf157 | 0.031559 | 0.675813 | 0.761801 |
| Clorf158 | -0.22885 | 0.002122 | 0.006569 |
| Clorf159 | 0.264278 | 0.000364 | 0.00145  |
| Clorf161 | -0.06059 | 0.421737 | 0.533989 |
| Clorf162 | 0.028982 | 0.700961 | 0.781664 |
| Clorf163 | -0.11363 | 0.130975 | 0.211784 |
| Clorf168 | -0.32801 | 7.83E-06 | 5.24E-05 |
| Clorf170 | 0.62121  | 2.22E-20 | 7.08E-18 |
| Clorf172 | 0.187673 | 0.012122 | 0.029116 |
| Clorf173 | -0.27998 | 0.000154 | 0.000691 |

|          |          |          |          |
|----------|----------|----------|----------|
| Clorf174 | 0.21447  | 0.004043 | 0.011435 |
| Clorf175 | 0.263697 | 0.000376 | 0.001488 |
| Clorf177 | 0.463186 | 7.50E-11 | 2.18E-09 |
| Clorf180 | 0.01544  | 0.837916 | 0.885673 |
| Clorf182 | -0.04312 | 0.567667 | 0.667562 |
| Clorf183 | -0.45489 | 1.78E-10 | 4.70E-09 |
| Clorf185 | -0.03037 | 0.687403 | 0.770736 |
| Clorf186 | 0.12025  | 0.109855 | 0.184325 |
| Clorf187 | 0.100214 | 0.183206 | 0.277143 |
| Clorf189 | -0.04748 | 0.5291   | 0.633663 |
| Clorf190 | 0.050752 | 0.501087 | 0.608219 |
| Clorf192 | -0.10551 | 0.161023 | 0.250143 |
| Clorf194 | -0.26068 | 0.000441 | 0.001707 |
| Clorf198 | 0.17041  | 0.022955 | 0.049858 |
| Clorf200 | 0.004994 | 0.947248 | 0.964367 |
| Clorf201 | 0.015208 | 0.840322 | 0.887161 |
| Clorf203 | -0.39342 | 5.55E-08 | 6.97E-07 |
| Clorf204 | -0.06393 | 0.396581 | 0.509319 |
| Clorf210 | 0.091642 | 0.223753 | 0.325954 |
| Clorf212 | 0.065247 | 0.386881 | 0.49962  |
| Clorf213 | -0.00448 | 0.952693 | 0.967792 |
| Clorf216 | 0.012195 | 0.87165  | 0.911292 |
| Clorf21  | -0.04823 | 0.522588 | 0.628148 |
| Clorf220 | 0.111353 | 0.138932 | 0.222144 |
| Clorf223 | -0.19026 | 0.010966 | 0.026727 |
| Clorf226 | -0.03466 | 0.646054 | 0.736152 |
| Clorf227 | -0.11709 | 0.119592 | 0.196839 |
| Clorf228 | 0.030884 | 0.682364 | 0.766968 |
| Clorf229 | -0.23045 | 0.00197  | 0.006155 |
| Clorf230 | -0.28092 | 0.000146 | 0.000659 |
| Clorf25  | -0.1258  | 0.094288 | 0.162465 |
| Clorf26  | -0.15866 | 0.0344   | 0.070287 |
| Clorf27  | 0.05541  | 0.462574 | 0.572901 |
| Clorf31  | 0.181419 | 0.015371 | 0.035566 |
| Clorf35  | 0.248329 | 0.000831 | 0.002932 |
| Clorf38  | 0.017421 | 0.817464 | 0.870765 |
| Clorf43  | 0.099718 | 0.185392 | 0.2798   |
| Clorf49  | 0.097627 | 0.194828 | 0.291482 |
| Clorf50  | 0.039522 | 0.600434 | 0.69705  |
| Clorf51  | 0.184016 | 0.013939 | 0.032736 |
| Clorf52  | 0.031975 | 0.671787 | 0.758474 |
| Clorf53  | 0.306243 | 3.22E-05 | 0.00018  |
| Clorf54  | 0.186582 | 0.012641 | 0.030168 |
| Clorf55  | -0.13701 | 0.06821  | 0.124473 |
| Clorf56  | -0.12656 | 0.092303 | 0.159709 |
| Clorf57  | 0.195234 | 0.009012 | 0.022561 |
| Clorf58  | -0.01524 | 0.839976 | 0.886938 |
| Clorf59  | 0.244896 | 0.000986 | 0.003394 |
| Clorf61  | -0.09114 | 0.226298 | 0.328813 |
| Clorf63  | 0.229757 | 0.002035 | 0.006327 |
| Clorf64  | -0.05659 | 0.453087 | 0.564048 |
| Clorf65  | 0.101561 | 0.177356 | 0.27     |
| Clorf66  | 0.155988 | 0.037597 | 0.075621 |
| Clorf68  | -0.06418 | 0.394724 | 0.507395 |

|           |          |          |          |
|-----------|----------|----------|----------|
| C1orf69   | -0.11655 | 0.121312 | 0.198891 |
| C1orf70   | 0.098462 | 0.191017 | 0.28677  |
| C1orf74   | -0.11836 | 0.115593 | 0.191756 |
| C1orf77   | 0.153994 | 0.040139 | 0.079931 |
| C1orf83   | -0.04869 | 0.518625 | 0.624409 |
| C1orf84   | -0.04006 | 0.595485 | 0.692817 |
| C1orf85   | 0.078598 | 0.297016 | 0.406872 |
| C1orf86   | 0.168528 | 0.02453  | 0.052799 |
| C1orf87   | -0.22603 | 0.002416 | 0.007338 |
| C1orf88   | -0.28613 | 0.000108 | 0.000508 |
| C1orf89   | -0.23892 | 0.001319 | 0.004357 |
| C1orf91   | 0.146816 | 0.050514 | 0.096808 |
| C1orf92   | 0.079476 | 0.291634 | 0.40125  |
| C1orf93   | 0.522885 | 7.04E-14 | 4.30E-12 |
| C1orf94   | 0.11843  | 0.115379 | 0.191482 |
| C1orf95   | -0.21576 | 0.003823 | 0.010891 |
| C1orf96   | -0.42121 | 4.78E-09 | 8.32E-08 |
| C1orf97   | 0.072935 | 0.333293 | 0.445548 |
| C1orf9    | -0.30627 | 3.22E-05 | 0.00018  |
| C20orf103 | 0.318001 | 1.52E-05 | 9.35E-05 |
| C20orf106 | 0.109084 | 0.147216 | 0.232733 |
| C20orf107 | 0.078316 | 0.298757 | 0.408776 |
| C20orf108 | -0.25785 | 0.000511 | 0.001937 |
| C20orf111 | 0.174224 | 0.020025 | 0.044451 |
| C20orf112 | 0.1133   | 0.132114 | 0.213294 |
| C20orf114 | 0.317252 | 1.60E-05 | 9.74E-05 |
| C20orf117 | -0.49271 | 2.83E-12 | 1.17E-10 |
| C20orf118 | 0.13813  | 0.065955 | 0.121006 |
| C20orf11  | -0.08814 | 0.24201  | 0.346474 |
| C20orf123 | 0.060182 | 0.424876 | 0.537111 |
| C20orf12  | -0.21962 | 0.003224 | 0.009392 |
| C20orf132 | -0.46044 | 1.00E-10 | 2.81E-09 |
| C20orf134 | 0.164422 | 0.028296 | 0.059594 |
| C20orf135 | 0.091976 | 0.222067 | 0.324149 |
| C20orf141 | -0.09942 | 0.186701 | 0.281482 |
| C20orf144 | -0.17338 | 0.020644 | 0.04562  |
| C20orf151 | 0.262677 | 0.000397 | 0.00156  |
| C20orf152 | -0.15066 | 0.044713 | 0.087574 |
| C20orf160 | -0.17424 | 0.020014 | 0.044436 |
| C20orf165 | -0.04393 | 0.560405 | 0.661382 |
| C20orf166 | 0.074832 | 0.320836 | 0.432697 |
| C20orf173 | -0.05331 | 0.479736 | 0.589284 |
| C20orf177 | -0.20208 | 0.006828 | 0.017872 |
| C20orf186 | -0.19507 | 0.009071 | 0.02269  |
| C20orf191 | 0.02129  | 0.77789  | 0.842388 |
| C20orf194 | -0.17846 | 0.017158 | 0.039012 |
| C20orf195 | 0.199402 | 0.00762  | 0.019594 |
| C20orf196 | -0.24551 | 0.000956 | 0.003303 |
| C20orf197 | -0.05906 | 0.433541 | 0.545153 |
| C20orf199 | 0.204261 | 0.00624  | 0.016534 |
| C20orf200 | 0.037839 | 0.616047 | 0.710884 |
| C20orf201 | -0.1788  | 0.016944 | 0.0386   |
| C20orf202 | -0.04933 | 0.51315  | 0.619288 |
| C20orf203 | 0.014537 | 0.847284 | 0.892557 |

|           |          |          |          |
|-----------|----------|----------|----------|
| C20orf20  | 0.281747 | 0.000139 | 0.000634 |
| C20orf24  | 0.32109  | 1.24E-05 | 7.85E-05 |
| C20orf26  | -0.37916 | 1.80E-07 | 1.96E-06 |
| C20orf27  | 0.121904 | 0.105019 | 0.177765 |
| C20orf29  | -0.31249 | 2.17E-05 | 0.000127 |
| C20orf30  | -0.29986 | 4.77E-05 | 0.000252 |
| C20orf3   | -0.34853 | 1.87E-06 | 1.49E-05 |
| C20orf43  | 0.010752 | 0.886725 | 0.92116  |
| C20orf46  | -0.08883 | 0.238372 | 0.342519 |
| C20orf4   | -0.06776 | 0.368799 | 0.482258 |
| C20orf54  | 0.562259 | 3.17E-16 | 3.42E-14 |
| C20orf56  | -0.34956 | 1.73E-06 | 1.40E-05 |
| C20orf70  | -0.12124 | 0.106955 | 0.180432 |
| C20orf72  | 0.150162 | 0.04543  | 0.088786 |
| C20orf7   | -0.03146 | 0.676782 | 0.762541 |
| C20orf85  | 0.096117 | 0.201854 | 0.300133 |
| C20orf94  | -0.31163 | 2.29E-05 | 0.000133 |
| C20orf96  | -0.08239 | 0.274248 | 0.382351 |
| C21orf119 | -0.03542 | 0.63884  | 0.730029 |
| C21orf121 | 0.015088 | 0.841567 | 0.888191 |
| C21orf122 | -0.17976 | 0.016353 | 0.037505 |
| C21orf125 | 0.140763 | 0.060913 | 0.113024 |
| C21orf128 | -0.06676 | 0.375975 | 0.488946 |
| C21orf129 | 0.497692 | 1.57E-12 | 6.96E-11 |
| C21orf130 | 0.176734 | 0.018279 | 0.041125 |
| C21orf131 | 0.03173  | 0.674153 | 0.760408 |
| C21orf15  | -0.04679 | 0.535097 | 0.638766 |
| C21orf29  | -0.34283 | 2.81E-06 | 2.15E-05 |
| C21orf2   | -0.05413 | 0.472993 | 0.582776 |
| C21orf33  | -0.05464 | 0.468853 | 0.578829 |
| C21orf34  | -0.01754 | 0.81629  | 0.869965 |
| C21orf45  | 0.096267 | 0.201148 | 0.299241 |
| C21orf49  | -0.19701 | 0.008392 | 0.021276 |
| C21orf54  | 0.016083 | 0.831266 | 0.880373 |
| C21orf56  | 0.036295 | 0.630527 | 0.722935 |
| C21orf57  | -0.05835 | 0.43912  | 0.550857 |
| C21orf58  | -0.25978 | 0.000462 | 0.001774 |
| C21orf59  | 0.158637 | 0.034431 | 0.070327 |
| C21orf62  | -0.05806 | 0.441388 | 0.553178 |
| C21orf63  | 0.215354 | 0.003891 | 0.01105  |
| C21orf67  | 0.013887 | 0.854034 | 0.897851 |
| C21orf70  | 0.223916 | 0.002659 | 0.007963 |
| C21orf71  | -0.03432 | 0.649218 | 0.738431 |
| C21orf7   | -0.19022 | 0.010984 | 0.026769 |
| C21orf81  | 0.142412 | 0.05792  | 0.108406 |
| C21orf82  | 0.07475  | 0.321366 | 0.433206 |
| C21orf84  | 0.146276 | 0.051378 | 0.098217 |
| C21orf88  | 0.184437 | 0.013719 | 0.03232  |
| C21orf90  | -0.11689 | 0.12022  | 0.197675 |
| C21orf91  | -0.04934 | 0.513113 | 0.619281 |
| C21orf94  | -0.19843 | 0.007926 | 0.020275 |
| C21orf96  | 0.201359 | 0.007035 | 0.018327 |
| C21orf99  | 0.06512  | 0.387808 | 0.500556 |
| C22orf13  | -0.05002 | 0.50732  | 0.614126 |

|          |          |          |          |
|----------|----------|----------|----------|
| C22orf15 | -0.1531  | 0.041322 | 0.081923 |
| C22orf23 | -0.09221 | 0.220867 | 0.322723 |
| C22orf24 | -0.10833 | 0.150053 | 0.236369 |
| C22orf25 | -0.1963  | 0.008638 | 0.021792 |
| C22orf26 | -0.23687 | 0.001455 | 0.004745 |
| C22orf27 | -0.02964 | 0.694501 | 0.776274 |
| C22orf28 | -0.07611 | 0.312601 | 0.423606 |
| C22orf29 | -0.30521 | 3.43E-05 | 0.00019  |
| C22orf30 | -0.33304 | 5.56E-06 | 3.91E-05 |
| C22orf31 | -0.25765 | 0.000516 | 0.001954 |
| C22orf32 | -0.16195 | 0.030798 | 0.064031 |
| C22orf33 | 0.027729 | 0.713312 | 0.791468 |
| C22orf34 | -0.11423 | 0.128938 | 0.209105 |
| C22orf36 | 0.26241  | 0.000402 | 0.001578 |
| C22orf39 | -0.30774 | 2.93E-05 | 0.000165 |
| C22orf40 | 0.029841 | 0.692542 | 0.774673 |
| C22orf41 | 0.175284 | 0.019271 | 0.043029 |
| C22orf42 | -0.29608 | 6.00E-05 | 0.000306 |
| C22orf43 | -0.01741 | 0.817595 | 0.870792 |
| C22orf45 | -0.19504 | 0.009084 | 0.022716 |
| C22orf46 | -0.0956  | 0.204306 | 0.303185 |
| C22orf9  | 0.117888 | 0.117066 | 0.193562 |
| C2CD2L   | -0.11391 | 0.130046 | 0.210557 |
| C2CD2    | 0.038132 | 0.613315 | 0.708724 |
| C2CD3    | -0.15003 | 0.045623 | 0.089075 |
| C2CD4A   | -0.24288 | 0.001088 | 0.003693 |
| C2CD4B   | -0.15864 | 0.034429 | 0.070327 |
| C2CD4C   | -0.06836 | 0.364606 | 0.477889 |
| C2CD4D   | 0.018216 | 0.809292 | 0.865015 |
| C2orf14  | -0.31726 | 1.60E-05 | 9.74E-05 |
| C2orf15  | -0.08533 | 0.257454 | 0.363843 |
| C2orf16  | 0.086735 | 0.249647 | 0.355072 |
| C2orf18  | 0.165139 | 0.027605 | 0.058349 |
| C2orf24  | 0.28373  | 0.000124 | 0.000574 |
| C2orf27A | 0.276814 | 0.000184 | 0.000804 |
| C2orf27B | -0.14977 | 0.045998 | 0.089607 |
| C2orf28  | 0.084633 | 0.261348 | 0.368162 |
| C2orf29  | 0.4059   | 1.90E-08 | 2.74E-07 |
| C2orf34  | 0.252967 | 0.000657 | 0.002391 |
| C2orf39  | -0.14098 | 0.060506 | 0.112342 |
| C2orf3   | -0.26785 | 0.000301 | 0.00123  |
| C2orf40  | -0.0584  | 0.438703 | 0.550438 |
| C2orf42  | -0.29387 | 6.85E-05 | 0.000343 |
| C2orf43  | -0.03461 | 0.646529 | 0.73655  |
| C2orf44  | -0.0716  | 0.342232 | 0.454486 |
| C2orf47  | 0.222196 | 0.002874 | 0.008526 |
| C2orf48  | 0.234061 | 0.001663 | 0.00533  |
| C2orf49  | 0.236841 | 0.001458 | 0.004751 |
| C2orf50  | -0.0409  | 0.587749 | 0.686108 |
| C2orf51  | -0.10114 | 0.179173 | 0.272263 |
| C2orf52  | -0.21595 | 0.003791 | 0.010807 |
| C2orf53  | 0.030577 | 0.685357 | 0.76949  |
| C2orf54  | 0.264323 | 0.000363 | 0.001449 |
| C2orf55  | 0.059957 | 0.426607 | 0.538714 |

|         |          |          |          |
|---------|----------|----------|----------|
| C2orf56 | 0.328086 | 7.79E-06 | 5.23E-05 |
| C2orf57 | -0.01319 | 0.861304 | 0.903668 |
| C2orf58 | -0.15167 | 0.04328  | 0.085215 |
| C2orf60 | 0.154964 | 0.038885 | 0.077794 |
| C2orf61 | 0.266758 | 0.000319 | 0.001294 |
| C2orf62 | -0.11746 | 0.118415 | 0.19534  |
| C2orf63 | -0.0768  | 0.30823  | 0.418666 |
| C2orf64 | 0.096302 | 0.200984 | 0.299049 |
| C2orf65 | 0.118719 | 0.11449  | 0.190325 |
| C2orf66 | -0.27504 | 0.000203 | 0.000876 |
| C2orf67 | 0.091491 | 0.224521 | 0.326751 |
| C2orf68 | 0.183025 | 0.014471 | 0.033817 |
| C2orf69 | -0.2392  | 0.001302 | 0.00431  |
| C2orf70 | -0.04323 | 0.566691 | 0.66685  |
| C2orf71 | -0.06029 | 0.424029 | 0.536315 |
| C2orf72 | -0.11693 | 0.120104 | 0.197516 |
| C2orf73 | -0.19164 | 0.01039  | 0.025512 |
| C2orf74 | -0.01276 | 0.865781 | 0.906969 |
| C2orf76 | -0.22014 | 0.003151 | 0.009207 |
| C2orf77 | -0.26815 | 0.000296 | 0.001215 |
| C2orf78 | 0.093871 | 0.212644 | 0.313116 |
| C2orf79 | 0.143826 | 0.05545  | 0.104695 |
| C2orf7  | -0.22967 | 0.002043 | 0.006346 |
| C2orf80 | -0.16039 | 0.032466 | 0.066942 |
| C2orf81 | -0.05216 | 0.489304 | 0.59788  |
| C2orf82 | 0.227678 | 0.00224  | 0.006884 |
| C2orf83 | -0.01717 | 0.820023 | 0.872489 |
| C2orf84 | -0.03347 | 0.657359 | 0.745976 |
| C2orf85 | -0.1392  | 0.063859 | 0.117673 |
| C2orf86 | -0.18689 | 0.012493 | 0.029876 |
| C2orf88 | 0.074021 | 0.326121 | 0.438162 |
| C2orf89 | 0.368382 | 4.21E-07 | 4.09E-06 |
| C2      | 0.04397  | 0.560037 | 0.660987 |
| C3AR1   | -0.03002 | 0.690753 | 0.773659 |
| C3P1    | 0.097078 | 0.197363 | 0.294541 |
| C3orf10 | 0.213306 | 0.004253 | 0.011919 |
| C3orf14 | -0.24366 | 0.001047 | 0.00357  |
| C3orf15 | -0.24541 | 0.000961 | 0.003318 |
| C3orf16 | 0.039633 | 0.599409 | 0.696154 |
| C3orf17 | 0.006667 | 0.929617 | 0.951325 |
| C3orf18 | -0.26167 | 0.000418 | 0.001631 |
| C3orf19 | 0.033077 | 0.661155 | 0.749551 |
| C3orf1  | 0.214203 | 0.004091 | 0.011547 |
| C3orf20 | -0.16566 | 0.027114 | 0.05746  |
| C3orf21 | 0.233797 | 0.001684 | 0.005385 |
| C3orf22 | -0.00352 | 0.96278  | 0.974709 |
| C3orf23 | 0.230791 | 0.001939 | 0.006072 |
| C3orf24 | 0.24849  | 0.000824 | 0.002916 |
| C3orf26 | -0.0426  | 0.57237  | 0.672093 |
| C3orf27 | 0.011307 | 0.880925 | 0.917438 |
| C3orf30 | -0.05413 | 0.472985 | 0.582776 |
| C3orf31 | 0.303737 | 3.76E-05 | 0.000205 |
| C3orf32 | -0.26451 | 0.00036  | 0.001437 |
| C3orf33 | -0.28296 | 0.00013  | 0.000597 |

|         |          |          |          |
|---------|----------|----------|----------|
| C3orf34 | -0.2486  | 0.00082  | 0.002903 |
| C3orf35 | 0.178887 | 0.016888 | 0.038485 |
| C3orf36 | -0.18454 | 0.013668 | 0.032238 |
| C3orf37 | 0.356825 | 1.01E-06 | 8.77E-06 |
| C3orf38 | 0.061724 | 0.413087 | 0.525095 |
| C3orf39 | -0.22348 | 0.002712 | 0.008106 |
| C3orf42 | -0.19858 | 0.007878 | 0.020164 |
| C3orf43 | -0.04286 | 0.569999 | 0.669946 |
| C3orf45 | 0.120163 | 0.110116 | 0.184732 |
| C3orf47 | -0.10818 | 0.150624 | 0.237099 |
| C3orf48 | 0.035207 | 0.640816 | 0.731957 |
| C3orf49 | -0.066   | 0.381396 | 0.494118 |
| C3orf50 | -0.13358 | 0.075472 | 0.135474 |
| C3orf51 | -0.13734 | 0.067537 | 0.123415 |
| C3orf52 | 0.409753 | 1.35E-08 | 2.04E-07 |
| C3orf54 | -0.05882 | 0.435476 | 0.54698  |
| C3orf55 | 0.369104 | 3.98E-07 | 3.91E-06 |
| C3orf57 | 0.172624 | 0.021212 | 0.046632 |
| C3orf58 | 0.067382 | 0.371497 | 0.484564 |
| C3orf59 | -0.17574 | 0.018955 | 0.042447 |
| C3orf62 | -0.19268 | 0.009975 | 0.024646 |
| C3orf63 | -0.28937 | 8.94E-05 | 0.000431 |
| C3orf64 | -0.00742 | 0.921689 | 0.94566  |
| C3orf65 | 0.19279  | 0.00993  | 0.024554 |
| C3orf66 | -0.18559 | 0.013131 | 0.031164 |
| C3orf67 | -0.12307 | 0.101724 | 0.173076 |
| C3orf70 | -0.21669 | 0.003669 | 0.010501 |
| C3orf71 | -0.20737 | 0.005478 | 0.014785 |
| C3orf72 | 0.120355 | 0.109545 | 0.183898 |
| C3orf74 | 0.152231 | 0.042505 | 0.083933 |
| C3orf75 | -0.16934 | 0.023843 | 0.051553 |
| C3orf77 | -0.17669 | 0.01831  | 0.041177 |
| C3orf79 | -0.09061 | 0.229054 | 0.332062 |
| C3      | 0.173392 | 0.020635 | 0.045605 |
| C4A     | 0.086655 | 0.250086 | 0.355617 |
| C4BPA   | 0.050099 | 0.506619 | 0.613503 |
| C4BPB   | 0.372595 | 3.03E-07 | 3.09E-06 |
| C4orf10 | 0.184417 | 0.013729 | 0.032332 |
| C4orf12 | -0.37106 | 3.42E-07 | 3.42E-06 |
| C4orf14 | -0.01989 | 0.79213  | 0.852845 |
| C4orf17 | 0.026957 | 0.720958 | 0.797284 |
| C4orf19 | 0.154656 | 0.03928  | 0.078512 |
| C4orf21 | -0.06666 | 0.376687 | 0.489428 |
| C4orf22 | -0.08096 | 0.2827   | 0.391355 |
| C4orf23 | 0.133967 | 0.074619 | 0.134151 |
| C4orf26 | 0.279963 | 0.000154 | 0.000692 |
| C4orf27 | -0.06338 | 0.40062  | 0.51324  |
| C4orf29 | -0.13021 | 0.08322  | 0.146823 |
| C4orf31 | 0.260692 | 0.000441 | 0.001706 |
| C4orf32 | -0.13929 | 0.063693 | 0.117487 |
| C4orf33 | 0.278565 | 0.000166 | 0.000739 |
| C4orf34 | -0.1552  | 0.038583 | 0.077306 |
| C4orf35 | 0.035335 | 0.639603 | 0.730774 |
| C4orf36 | 0.081205 | 0.281232 | 0.389677 |

|         |          |          |          |
|---------|----------|----------|----------|
| C4orf37 | -0.07767 | 0.302747 | 0.413006 |
| C4orf38 | 0.414025 | 9.21E-09 | 1.47E-07 |
| C4orf39 | -0.22506 | 0.002524 | 0.007626 |
| C4orf3  | 0.015335 | 0.839003 | 0.886335 |
| C4orf40 | -0.08684 | 0.249048 | 0.354599 |
| C4orf41 | -0.19112 | 0.010603 | 0.025972 |
| C4orf42 | -0.23001 | 0.002011 | 0.006263 |
| C4orf43 | 0.253446 | 0.000641 | 0.002345 |
| C4orf44 | -0.11281 | 0.133802 | 0.215464 |
| C4orf45 | 0.011969 | 0.874006 | 0.912829 |
| C4orf46 | -0.32748 | 8.12E-06 | 5.40E-05 |
| C4orf47 | -0.05341 | 0.478893 | 0.588468 |
| C4orf48 | 0.140143 | 0.062071 | 0.114925 |
| C4orf49 | -0.28112 | 0.000144 | 0.000653 |
| C4orf50 | -0.24174 | 0.00115  | 0.003879 |
| C4orf51 | -0.07015 | 0.35213  | 0.464914 |
| C4orf52 | 0.090825 | 0.227929 | 0.330698 |
| C4orf6  | 0.047336 | 0.530366 | 0.634796 |
| C4orf7  | 0.117039 | 0.119746 | 0.197058 |
| C5AR1   | 0.001358 | 0.985644 | 0.989849 |
| C5orf13 | 0.158618 | 0.034453 | 0.070365 |
| C5orf15 | 0.032845 | 0.663388 | 0.751652 |
| C5orf20 | -0.07013 | 0.352287 | 0.465038 |
| C5orf22 | -0.09523 | 0.206068 | 0.305243 |
| C5orf23 | 0.318933 | 1.43E-05 | 8.87E-05 |
| C5orf24 | -0.12981 | 0.084171 | 0.148198 |
| C5orf25 | -0.06122 | 0.416907 | 0.529305 |
| C5orf27 | -0.18226 | 0.014891 | 0.034635 |
| C5orf28 | -0.04906 | 0.515448 | 0.62153  |
| C5orf30 | 0.192361 | 0.010099 | 0.02491  |
| C5orf32 | 0.31938  | 1.39E-05 | 8.65E-05 |
| C5orf33 | -0.28176 | 0.000139 | 0.000634 |
| C5orf34 | 0.139232 | 0.063805 | 0.117586 |
| C5orf35 | 0.065425 | 0.385579 | 0.498296 |
| C5orf36 | -0.2208  | 0.003059 | 0.008982 |
| C5orf38 | -0.15899 | 0.034026 | 0.069623 |
| C5orf39 | 0.061189 | 0.417152 | 0.529547 |
| C5orf40 | -0.15204 | 0.042762 | 0.084339 |
| C5orf41 | -0.18316 | 0.014398 | 0.033666 |
| C5orf42 | -0.27412 | 0.000213 | 0.000913 |
| C5orf43 | 0.193562 | 0.009632 | 0.023921 |
| C5orf44 | -0.17625 | 0.018607 | 0.041753 |
| C5orf45 | -0.02889 | 0.7019   | 0.782382 |
| C5orf46 | 0.396841 | 4.16E-08 | 5.40E-07 |
| C5orf47 | -0.1321  | 0.078795 | 0.140369 |
| C5orf48 | -0.20428 | 0.006234 | 0.016521 |
| C5orf49 | -0.24519 | 0.000971 | 0.00335  |
| C5orf4  | -0.03753 | 0.618975 | 0.713389 |
| C5orf51 | -0.23681 | 0.00146  | 0.004757 |
| C5orf52 | -0.15471 | 0.039205 | 0.078373 |
| C5orf53 | -0.25427 | 0.000615 | 0.002263 |
| C5orf54 | -0.28164 | 0.00014  | 0.000637 |
| C5orf55 | -0.27871 | 0.000165 | 0.000734 |
| C5orf56 | -0.10129 | 0.178542 | 0.271492 |



|          |          |          |          |
|----------|----------|----------|----------|
| C5orf58  | 0.056545 | 0.453443 | 0.564371 |
| C5orf60  | -0.06301 | 0.403381 | 0.516072 |
| C5orf62  | 0.179739 | 0.016364 | 0.03752  |
| C5       | -0.46147 | 8.99E-11 | 2.55E-09 |
| C6orf103 | -0.18885 | 0.011582 | 0.027997 |
| C6orf105 | 0.341374 | 3.11E-06 | 2.35E-05 |
| C6orf106 | -0.06318 | 0.402154 | 0.514839 |
| C6orf108 | 0.090223 | 0.23104  | 0.334523 |
| C6orf10  | 0.070306 | 0.351052 | 0.463677 |
| C6orf114 | 0.289798 | 8.72E-05 | 0.000422 |
| C6orf115 | 0.275395 | 0.000199 | 0.000862 |
| C6orf118 | -0.26784 | 0.000301 | 0.00123  |
| C6orf120 | -0.41032 | 1.28E-08 | 1.95E-07 |
| C6orf122 | -0.40882 | 1.47E-08 | 2.18E-07 |
| C6orf123 | -0.18492 | 0.013471 | 0.031837 |
| C6orf124 | 0.061888 | 0.411841 | 0.523882 |
| C6orf125 | 0.294231 | 6.71E-05 | 0.000337 |
| C6orf126 | -0.16108 | 0.031712 | 0.065567 |
| C6orf127 | 0.030769 | 0.683484 | 0.76791  |
| C6orf129 | 0.100149 | 0.183492 | 0.277504 |
| C6orf130 | -0.30223 | 4.13E-05 | 0.000223 |
| C6orf132 | 0.514549 | 2.02E-13 | 1.12E-11 |
| C6orf134 | 0.18832  | 0.011824 | 0.028481 |
| C6orf136 | 0.036557 | 0.628058 | 0.720958 |
| C6orf138 | -0.16382 | 0.028883 | 0.060642 |
| C6orf141 | 0.317544 | 1.57E-05 | 9.60E-05 |
| C6orf142 | -0.01217 | 0.871884 | 0.911337 |
| C6orf145 | 0.221023 | 0.003029 | 0.008916 |
| C6orf146 | -0.14107 | 0.06035  | 0.112115 |
| C6orf147 | 0.363978 | 5.91E-07 | 5.50E-06 |
| C6orf150 | 0.128639 | 0.087028 | 0.152306 |
| C6orf153 | -0.01108 | 0.883324 | 0.918969 |
| C6orf154 | -0.28136 | 0.000142 | 0.000646 |
| C6orf155 | 0.221906 | 0.002911 | 0.008622 |
| C6orf15  | 0.2829   | 0.00013  | 0.000598 |
| C6orf162 | -0.35323 | 1.32E-06 | 1.10E-05 |
| C6orf163 | -0.30367 | 3.78E-05 | 0.000206 |
| C6orf164 | -0.0455  | 0.546453 | 0.64906  |
| C6orf165 | -0.32682 | 8.49E-06 | 5.62E-05 |
| C6orf167 | -0.17484 | 0.019585 | 0.043621 |
| C6orf168 | -0.38601 | 1.03E-07 | 1.19E-06 |
| C6orf170 | -0.20412 | 0.006276 | 0.016617 |
| C6orf174 | -0.35062 | 1.60E-06 | 1.31E-05 |
| C6orf176 | -0.27664 | 0.000185 | 0.000811 |
| C6orf182 | -0.12072 | 0.10845  | 0.182429 |
| C6orf186 | -0.05825 | 0.439881 | 0.551741 |
| C6orf191 | -0.07863 | 0.296792 | 0.40665  |
| C6orf192 | -0.18422 | 0.013834 | 0.032527 |
| C6orf195 | 0.009593 | 0.898871 | 0.929422 |
| C6orf1   | 0.120122 | 0.110237 | 0.184903 |
| C6orf201 | -0.1397  | 0.062906 | 0.116177 |
| C6orf203 | -0.10772 | 0.15239  | 0.239326 |
| C6orf204 | -0.21952 | 0.003238 | 0.009424 |
| C6orf208 | -0.32409 | 1.02E-05 | 6.61E-05 |

|          |          |          |          |
|----------|----------|----------|----------|
| C6orf211 | -0.11478 | 0.127102 | 0.206738 |
| C6orf217 | -0.35017 | 1.65E-06 | 1.35E-05 |
| C6orf218 | 0.293644 | 6.95E-05 | 0.000346 |
| C6orf221 | 0.00189  | 0.980022 | 0.986207 |
| C6orf222 | 0.213128 | 0.004286 | 0.011991 |
| C6orf223 | 0.46487  | 6.27E-11 | 1.87E-09 |
| C6orf225 | -0.33633 | 4.43E-06 | 3.21E-05 |
| C6orf226 | 0.041379 | 0.583412 | 0.682142 |
| C6orf227 | 0.276766 | 0.000184 | 0.000806 |
| C6orf25  | -0.04252 | 0.573036 | 0.672715 |
| C6orf26  | -0.02662 | 0.724295 | 0.800079 |
| C6orf27  | -0.19431 | 0.009348 | 0.023308 |
| C6orf35  | -0.23821 | 0.001365 | 0.004488 |
| C6orf41  | -0.13186 | 0.07935  | 0.141191 |
| C6orf47  | 0.151987 | 0.042841 | 0.084468 |
| C6orf48  | -0.10222 | 0.174554 | 0.266907 |
| C6orf52  | 0.045173 | 0.549341 | 0.651786 |
| C6orf57  | -0.14908 | 0.047021 | 0.09129  |
| C6orf58  | -0.29763 | 5.47E-05 | 0.000283 |
| C6orf59  | -0.05157 | 0.494216 | 0.602453 |
| C6orf62  | -0.28659 | 0.000105 | 0.000496 |
| C6orf64  | -0.45271 | 2.23E-10 | 5.68E-09 |
| C6orf70  | -0.13593 | 0.070434 | 0.12793  |
| C6orf72  | -0.31077 | 2.42E-05 | 0.000139 |
| C6orf81  | -0.20889 | 0.005138 | 0.014018 |
| C6orf89  | -0.48765 | 5.07E-12 | 1.96E-10 |
| C6orf94  | -0.04814 | 0.523369 | 0.62886  |
| C6orf97  | 0.047166 | 0.531848 | 0.635992 |
| C6       | -0.02688 | 0.721695 | 0.797876 |
| C7orf10  | 0.423895 | 3.72E-09 | 6.71E-08 |
| C7orf11  | 0.102118 | 0.174982 | 0.267313 |
| C7orf13  | -0.10287 | 0.171822 | 0.263523 |
| C7orf16  | 0.047238 | 0.531225 | 0.635477 |
| C7orf23  | 0.386793 | 9.65E-08 | 1.13E-06 |
| C7orf25  | -0.10113 | 0.179224 | 0.272301 |
| C7orf26  | -0.29031 | 8.46E-05 | 0.000411 |
| C7orf27  | 0.053926 | 0.474664 | 0.584361 |
| C7orf28A | 0.195671 | 0.008857 | 0.022236 |
| C7orf28B | 0.160441 | 0.032407 | 0.066835 |
| C7orf29  | -0.26985 | 0.00027  | 0.00112  |
| C7orf30  | 0.089588 | 0.234352 | 0.338378 |
| C7orf31  | -0.16814 | 0.024865 | 0.05338  |
| C7orf33  | -0.13317 | 0.076373 | 0.136793 |
| C7orf34  | -0.01196 | 0.874103 | 0.912834 |
| C7orf36  | -0.17895 | 0.01685  | 0.038415 |
| C7orf40  | 0.087893 | 0.243359 | 0.348027 |
| C7orf41  | -0.45709 | 1.42E-10 | 3.82E-09 |
| C7orf42  | -0.01663 | 0.825652 | 0.876446 |
| C7orf43  | 0.033354 | 0.658498 | 0.74701  |
| C7orf44  | -0.13907 | 0.064127 | 0.118067 |
| C7orf45  | -0.06746 | 0.370945 | 0.484098 |
| C7orf46  | -0.00805 | 0.915054 | 0.94078  |
| C7orf47  | 0.300901 | 4.48E-05 | 0.000239 |
| C7orf49  | -0.15055 | 0.044863 | 0.087835 |

|          |          |          |          |
|----------|----------|----------|----------|
| C7orf4   | 0.106545 | 0.156921 | 0.245125 |
| C7orf50  | -0.01411 | 0.851739 | 0.896362 |
| C7orf51  | -0.15719 | 0.036135 | 0.073218 |
| C7orf52  | -0.23884 | 0.001324 | 0.004371 |
| C7orf53  | -0.0082  | 0.913545 | 0.939597 |
| C7orf54  | 0.008213 | 0.913352 | 0.939516 |
| C7orf55  | -0.22036 | 0.00312  | 0.009135 |
| C7orf57  | 0.034272 | 0.649717 | 0.738872 |
| C7orf58  | -0.0296  | 0.694898 | 0.776542 |
| C7orf59  | 0.142058 | 0.058552 | 0.109372 |
| C7orf60  | -0.232   | 0.001833 | 0.005783 |
| C7orf61  | 0.196288 | 0.008641 | 0.021796 |
| C7orf63  | -0.25304 | 0.000655 | 0.002385 |
| C7orf64  | -0.27848 | 0.000167 | 0.000742 |
| C7orf65  | 0.001636 | 0.982712 | 0.988009 |
| C7orf68  | 0.163009 | 0.029701 | 0.062149 |
| C7orf69  | -0.03619 | 0.631505 | 0.723696 |
| C7orf70  | -0.03928 | 0.602677 | 0.698907 |
| C7orf71  | 0.001598 | 0.98311  | 0.988159 |
| C7orf72  | -0.08926 | 0.236055 | 0.340017 |
| C7       | -0.20651 | 0.005681 | 0.015261 |
| C8A      | -0.09773 | 0.19436  | 0.290937 |
| C8B      | -0.01782 | 0.813339 | 0.867849 |
| C8G      | -0.05045 | 0.503655 | 0.610774 |
| C8ORFK29 | -0.0125  | 0.868441 | 0.909177 |
| C8orf12  | -0.16951 | 0.0237   | 0.051297 |
| C8orf22  | 0.088746 | 0.238797 | 0.342942 |
| C8orf30A | 0.116638 | 0.121026 | 0.198586 |
| C8orf31  | 0.489166 | 4.26E-12 | 1.67E-10 |
| C8orf33  | -0.05156 | 0.494269 | 0.602459 |
| C8orf34  | -0.09939 | 0.186855 | 0.281664 |
| C8orf37  | -0.32533 | 9.38E-06 | 6.14E-05 |
| C8orf38  | -0.19297 | 0.00986  | 0.024395 |
| C8orf39  | -0.12796 | 0.088717 | 0.154604 |
| C8orf40  | 0.261046 | 0.000432 | 0.00168  |
| C8orf41  | 0.004606 | 0.951346 | 0.966989 |
| C8orf42  | -0.49514 | 2.13E-12 | 9.12E-11 |
| C8orf44  | 0.053394 | 0.479036 | 0.588571 |
| C8orf45  | -0.28881 | 9.24E-05 | 0.000444 |
| C8orf46  | 0.005016 | 0.947023 | 0.964187 |
| C8orf47  | 0.158758 | 0.034293 | 0.070096 |
| C8orf48  | -0.23221 | 0.001815 | 0.005741 |
| C8orf4   | 0.246453 | 0.000912 | 0.003175 |
| C8orf51  | 0.027726 | 0.713338 | 0.791468 |
| C8orf55  | 0.246468 | 0.000912 | 0.003174 |
| C8orf56  | -0.10168 | 0.176851 | 0.269419 |
| C8orf58  | 0.437489 | 1.02E-09 | 2.15E-08 |
| C8orf59  | 0.174367 | 0.019922 | 0.044297 |
| C8orf71  | -0.12532 | 0.095553 | 0.164287 |
| C8orf73  | 0.606428 | 2.95E-19 | 7.20E-17 |
| C8orf74  | 0.349225 | 1.77E-06 | 1.43E-05 |
| C8orf75  | 0.086024 | 0.253561 | 0.359756 |
| C8orf76  | 0.058839 | 0.4353   | 0.546828 |
| C8orf77  | 0.147198 | 0.049912 | 0.095849 |

|           |          |          |          |
|-----------|----------|----------|----------|
| C8orf79   | -0.21934 | 0.003264 | 0.009487 |
| C8orf80   | -0.08797 | 0.242946 | 0.347605 |
| C8orf83   | -0.22086 | 0.003051 | 0.008964 |
| C8orf84   | -0.11785 | 0.11718  | 0.193706 |
| C8orf85   | -0.146   | 0.051827 | 0.09894  |
| C8orf86   | -0.37723 | 2.10E-07 | 2.23E-06 |
| C9orf100  | 0.274324 | 0.000211 | 0.000905 |
| C9orf102  | -0.27101 | 0.000253 | 0.00106  |
| C9orf103  | -0.03198 | 0.671774 | 0.758474 |
| C9orf106  | -0.15987 | 0.03304  | 0.067941 |
| C9orf109  | -0.0186  | 0.805364 | 0.86213  |
| C9orf110  | -0.02688 | 0.72176  | 0.797903 |
| C9orf114  | 0.032641 | 0.665359 | 0.75302  |
| C9orf116  | 0.019459 | 0.796552 | 0.856452 |
| C9orf117  | -0.17191 | 0.021757 | 0.047623 |
| C9orf119  | -0.18931 | 0.01138  | 0.027578 |
| C9orf11   | 0.262805 | 0.000394 | 0.001551 |
| C9orf122  | 0.119488 | 0.112144 | 0.187372 |
| C9orf123  | -0.0095  | 0.899805 | 0.930178 |
| C9orf125  | 0.099104 | 0.188126 | 0.283234 |
| C9orf128  | -0.01847 | 0.806675 | 0.863206 |
| C9orf129  | -0.124   | 0.099127 | 0.169328 |
| C9orf130  | -0.37097 | 3.44E-07 | 3.44E-06 |
| C9orf131  | -0.122   | 0.104736 | 0.177346 |
| C9orf135  | -0.21796 | 0.003471 | 0.009996 |
| C9orf139  | -0.14425 | 0.054723 | 0.10355  |
| C9orf140  | 0.355656 | 1.11E-06 | 9.48E-06 |
| C9orf142  | 0.155307 | 0.038449 | 0.077069 |
| C9orf144E | -0.17149 | 0.022087 | 0.048232 |
| C9orf144  | -0.08078 | 0.283782 | 0.392687 |
| C9orf150  | 0.230413 | 0.001974 | 0.006165 |
| C9orf152  | 0.285139 | 0.000114 | 0.000535 |
| C9orf153  | -0.20039 | 0.007318 | 0.018922 |
| C9orf156  | -0.34954 | 1.73E-06 | 1.40E-05 |
| C9orf163  | -0.14962 | 0.046229 | 0.089992 |
| C9orf167  | 0.528765 | 3.28E-14 | 2.16E-12 |
| C9orf169  | 0.492686 | 2.83E-12 | 1.17E-10 |
| C9orf16   | 0.262589 | 0.000399 | 0.001566 |
| C9orf170  | -0.07686 | 0.307843 | 0.418356 |
| C9orf171  | -0.04194 | 0.578316 | 0.677305 |
| C9orf172  | -0.21503 | 0.003946 | 0.011193 |
| C9orf173  | -0.11289 | 0.133524 | 0.215097 |
| C9orf21   | -0.26254 | 0.000399 | 0.001568 |
| C9orf23   | 0.071614 | 0.342145 | 0.454479 |
| C9orf24   | -0.11332 | 0.13204  | 0.213226 |
| C9orf25   | -0.30553 | 3.37E-05 | 0.000187 |
| C9orf30   | 0.036338 | 0.630123 | 0.722657 |
| C9orf37   | -0.01648 | 0.827216 | 0.877588 |
| C9orf3    | 0.120828 | 0.108147 | 0.182015 |
| C9orf40   | -0.29992 | 4.76E-05 | 0.000252 |
| C9orf41   | -0.26879 | 0.000286 | 0.001178 |
| C9orf43   | -0.2988  | 5.09E-05 | 0.000266 |
| C9orf44   | -0.14285 | 0.057142 | 0.107213 |
| C9orf45   | -0.34308 | 2.76E-06 | 2.11E-05 |

|         |          |          |          |
|---------|----------|----------|----------|
| C9orf46 | 0.077306 | 0.305049 | 0.415484 |
| C9orf47 | -0.03508 | 0.642009 | 0.732942 |
| C9orf4  | -0.40026 | 3.10E-08 | 4.18E-07 |
| C9orf50 | -0.06275 | 0.405334 | 0.517938 |
| C9orf53 | 0.078429 | 0.298059 | 0.408103 |
| C9orf57 | 0.073324 | 0.33071  | 0.442764 |
| C9orf5  | -0.21348 | 0.004221 | 0.011848 |
| C9orf64 | -0.17798 | 0.017463 | 0.039583 |
| C9orf66 | -0.03749 | 0.619314 | 0.713697 |
| C9orf68 | 0.174911 | 0.019534 | 0.043532 |
| C9orf69 | 0.123206 | 0.101331 | 0.172526 |
| C9orf6  | -0.007   | 0.926107 | 0.948806 |
| C9orf70 | -0.01528 | 0.839557 | 0.886712 |
| C9orf71 | -0.15734 | 0.035951 | 0.072912 |
| C9orf72 | -0.25049 | 0.000745 | 0.002677 |
| C9orf78 | -0.22379 | 0.002674 | 0.008004 |
| C9orf79 | 0.02623  | 0.728179 | 0.803158 |
| C9orf7  | -0.04884 | 0.517366 | 0.623235 |
| C9orf80 | -0.40747 | 1.65E-08 | 2.42E-07 |
| C9orf82 | -0.20866 | 0.005189 | 0.01413  |
| C9orf84 | 0.148898 | 0.047298 | 0.091764 |
| C9orf85 | -0.1563  | 0.037214 | 0.075004 |
| C9orf86 | -0.04755 | 0.528479 | 0.633342 |
| C9orf89 | 0.405804 | 1.91E-08 | 2.76E-07 |
| C9orf91 | -0.49586 | 1.96E-12 | 8.50E-11 |
| C9orf93 | -0.1254  | 0.095347 | 0.164033 |
| C9orf95 | 0.035611 | 0.636992 | 0.728549 |
| C9orf96 | -0.06697 | 0.374444 | 0.487463 |
| C9orf98 | 0.039049 | 0.604805 | 0.70098  |
| C9orf9  | -0.08787 | 0.243488 | 0.348162 |
| C9      | 0.004134 | 0.95632  | 0.970006 |
| CA10    | -0.30721 | 3.03E-05 | 0.00017  |
| CA11    | -0.12713 | 0.09083  | 0.157564 |
| CA12    | 0.37753  | 2.05E-07 | 2.19E-06 |
| CA13    | 0.411197 | 1.19E-08 | 1.83E-07 |
| CA14    | 0.44694  | 4.01E-10 | 9.58E-09 |
| CA1     | 0.090701 | 0.228566 | 0.331475 |
| CA2     | 0.197559 | 0.00821  | 0.020884 |
| CA3     | 0.13804  | 0.066135 | 0.121278 |
| CA4     | -0.10599 | 0.159118 | 0.247709 |
| CA5A    | 0.309555 | 2.62E-05 | 0.000149 |
| CA5BP   | 0.100354 | 0.18259  | 0.276458 |
| CA5B    | -0.32897 | 7.34E-06 | 4.96E-05 |
| CA6     | -0.0623  | 0.408732 | 0.520865 |
| CA7     | 0.14347  | 0.056064 | 0.105703 |
| CA8     | -0.40307 | 2.43E-08 | 3.41E-07 |
| CA9     | 0.409777 | 1.35E-08 | 2.04E-07 |
| CAB39L  | -0.17242 | 0.021366 | 0.046917 |
| CAB39   | 0.2201   | 0.003156 | 0.009219 |
| CABC1   | -0.24416 | 0.001022 | 0.003498 |
| CABIN1  | -0.28489 | 0.000116 | 0.000542 |
| CABLES1 | 0.169914 | 0.023361 | 0.050658 |
| CABLES2 | -0.19009 | 0.01104  | 0.026884 |
| CABP1   | -0.09443 | 0.209898 | 0.309879 |

|          |          |          |          |
|----------|----------|----------|----------|
| CABP4    | 0.55426  | 1.01E-15 | 9.30E-14 |
| CABP5    | -0.01398 | 0.853081 | 0.89723  |
| CABP7    | -0.11823 | 0.116013 | 0.192207 |
| CABYR    | -0.0198  | 0.793078 | 0.853367 |
| CACHD1   | -0.12999 | 0.083726 | 0.147571 |
| CACNA1A  | -0.34525 | 2.36E-06 | 1.84E-05 |
| CACNA1B  | -0.41023 | 1.29E-08 | 1.97E-07 |
| CACNA1C  | -0.25844 | 0.000496 | 0.001887 |
| CACNA1D  | -0.29377 | 6.89E-05 | 0.000344 |
| CACNA1E  | 0.028354 | 0.707137 | 0.786751 |
| CACNA1F  | 0.270979 | 0.000254 | 0.001061 |
| CACNA1G  | -0.263   | 0.00039  | 0.001537 |
| CACNA1H  | -0.284   | 0.000122 | 0.000566 |
| CACNA1I  | -0.1661  | 0.026698 | 0.056749 |
| CACNA1S  | -0.08462 | 0.261405 | 0.36819  |
| CACNA2D1 | -0.29585 | 6.09E-05 | 0.000309 |
| CACNA2D2 | -0.41498 | 8.45E-09 | 1.37E-07 |
| CACNA2D3 | -0.16464 | 0.028081 | 0.059204 |
| CACNA2D4 | 0.235545 | 0.00155  | 0.005013 |
| CACNB1   | 0.458704 | 1.20E-10 | 3.30E-09 |
| CACNB2   | -0.5398  | 7.52E-15 | 5.74E-13 |
| CACNB3   | 0.455436 | 1.69E-10 | 4.47E-09 |
| CACNB4   | -0.24641 | 0.000914 | 0.00318  |
| CACNG1   | -0.11236 | 0.135374 | 0.217615 |
| CACNG2   | -0.31996 | 1.34E-05 | 8.36E-05 |
| CACNG3   | -0.06222 | 0.409342 | 0.521474 |
| CACNG4   | 0.049857 | 0.508679 | 0.615244 |
| CACNG5   | -0.26393 | 0.000371 | 0.001474 |
| CACNG6   | 0.19675  | 0.008482 | 0.02147  |
| CACNG7   | -0.24083 | 0.001202 | 0.004025 |
| CACNG8   | 0.127393 | 0.090156 | 0.156587 |
| CACYBP   | 0.082456 | 0.27386  | 0.381924 |
| CADM1    | -0.25996 | 0.000458 | 0.001761 |
| CADM2    | -0.16345 | 0.029255 | 0.06132  |
| CADM3    | -0.08447 | 0.262261 | 0.369207 |
| CADM4    | -0.2389  | 0.00132  | 0.004359 |
| CADPS2   | -0.10355 | 0.168989 | 0.260106 |
| CADPS    | -0.30749 | 2.98E-05 | 0.000168 |
| CAD      | -0.01745 | 0.817147 | 0.870626 |
| CAGE1    | -0.16793 | 0.025051 | 0.053738 |
| CALB1    | -0.11664 | 0.121024 | 0.198586 |
| CALB2    | 0.405261 | 2.01E-08 | 2.88E-07 |
| CALCA    | -0.08677 | 0.249428 | 0.35491  |
| CALCB    | -0.11936 | 0.11254  | 0.187861 |
| CALCOCO1 | -0.0683  | 0.364991 | 0.478286 |
| CALCOCO2 | -0.11456 | 0.127856 | 0.207657 |
| CALCRL   | -0.21512 | 0.003931 | 0.011152 |
| CALCR    | -0.26811 | 0.000296 | 0.001216 |
| CALD1    | 0.06248  | 0.407376 | 0.519625 |
| CALHM1   | -0.00317 | 0.966492 | 0.977194 |
| CALHM2   | 0.131765 | 0.079562 | 0.141531 |
| CALHM3   | 0.409091 | 1.43E-08 | 2.14E-07 |
| CALM1    | -0.38917 | 7.93E-08 | 9.55E-07 |
| CALM2    | 0.329718 | 6.98E-06 | 4.74E-05 |

|           |          |          |          |
|-----------|----------|----------|----------|
| CALM3     | 0.187716 | 0.012102 | 0.029085 |
| CALML3    | -0.17857 | 0.017089 | 0.038877 |
| CALML4    | 0.332003 | 5.97E-06 | 4.17E-05 |
| CALML5    | 0.13255  | 0.077771 | 0.13882  |
| CALML6    | -0.0332  | 0.659983 | 0.74848  |
| CALN1     | -0.06581 | 0.382766 | 0.495634 |
| CALR3     | -0.07022 | 0.351679 | 0.464412 |
| CALR      | 0.134047 | 0.074445 | 0.13387  |
| CALU      | 0.082188 | 0.275428 | 0.383381 |
| CALY      | -0.19076 | 0.010753 | 0.02628  |
| CAMK1D    | -0.1544  | 0.039614 | 0.079092 |
| CAMK1G    | 0.02045  | 0.786431 | 0.848755 |
| CAMK1     | 0.017064 | 0.821146 | 0.873257 |
| CAMK2A    | -0.00749 | 0.920948 | 0.945329 |
| CAMK2B    | -0.23063 | 0.001954 | 0.00611  |
| CAMK2D    | -0.2448  | 0.00099  | 0.003409 |
| CAMK2G    | 0.083141 | 0.269883 | 0.37763  |
| CAMK2N1   | 0.460793 | 9.65E-11 | 2.72E-09 |
| CAMK2N2   | -0.32704 | 8.37E-06 | 5.55E-05 |
| CAMK4     | -0.00106 | 0.988829 | 0.991989 |
| CAMKK1    | -0.4099  | 1.33E-08 | 2.02E-07 |
| CAMKK2    | 0.117757 | 0.117474 | 0.19405  |
| CAMKV     | -0.13897 | 0.064318 | 0.118342 |
| CAMLG     | -0.02797 | 0.710974 | 0.789554 |
| CAMP      | 0.080389 | 0.286113 | 0.395111 |
| CAMSAP1L1 | 0.070926 | 0.346814 | 0.459213 |
| CAMSAP1   | -0.26523 | 0.000346 | 0.001389 |
| CAMTA1    | -0.04881 | 0.517611 | 0.623416 |
| CAMTA2    | -0.36865 | 4.12E-07 | 4.02E-06 |
| CAND1     | -0.33005 | 6.82E-06 | 4.65E-05 |
| CAND2     | -0.32329 | 1.07E-05 | 6.92E-05 |
| CANT1     | 0.129601 | 0.084673 | 0.148908 |
| CANX      | -0.29321 | 7.13E-05 | 0.000354 |
| CAP1      | 0.36917  | 3.96E-07 | 3.89E-06 |
| CAP2      | -0.10315 | 0.170658 | 0.262186 |
| CAPG      | 0.591502 | 3.52E-18 | 6.66E-16 |
| CAPN10    | 0.227369 | 0.002272 | 0.006968 |
| CAPN11    | -0.01005 | 0.894111 | 0.926196 |
| CAPN12    | 0.452402 | 2.30E-10 | 5.84E-09 |
| CAPN13    | 0.253126 | 0.000652 | 0.002376 |
| CAPN14    | 0.196707 | 0.008496 | 0.021501 |
| CAPN1     | 0.576952 | 3.49E-17 | 4.83E-15 |
| CAPN2     | 0.514907 | 1.94E-13 | 1.08E-11 |
| CAPN3     | 0.165766 | 0.027013 | 0.057288 |
| CAPN5     | 0.583523 | 1.26E-17 | 1.97E-15 |
| CAPN6     | 0.001088 | 0.988501 | 0.991811 |
| CAPN7     | -0.43822 | 9.50E-10 | 2.04E-08 |
| CAPN8     | 0.597069 | 1.42E-18 | 2.95E-16 |
| CAPN9     | 0.330375 | 6.67E-06 | 4.58E-05 |
| CAPNS1    | 0.465015 | 6.18E-11 | 1.84E-09 |
| CAPNS2    | 0.14367  | 0.055718 | 0.1051   |
| CAPRIN1   | 0.075918 | 0.313845 | 0.424806 |
| CAPRIN2   | 0.306085 | 3.25E-05 | 0.000181 |
| CAPS2     | -0.39193 | 6.29E-08 | 7.77E-07 |

|           |          |          |          |
|-----------|----------|----------|----------|
| CAPSL     | -0.30265 | 4.02E-05 | 0.000218 |
| CAPS      | 0.329902 | 6.89E-06 | 4.69E-05 |
| CAPZA1    | 0.394601 | 5.03E-08 | 6.41E-07 |
| CAPZA2    | 0.002475 | 0.97384  | 0.982171 |
| CAPZA3    | 0.386739 | 9.70E-08 | 1.13E-06 |
| CAPZB     | 0.179667 | 0.016407 | 0.037603 |
| CARD10    | 0.248761 | 0.000813 | 0.002886 |
| CARD11    | 0.57776  | 3.08E-17 | 4.29E-15 |
| CARD14    | 0.156096 | 0.037463 | 0.075415 |
| CARD16    | 0.313883 | 1.99E-05 | 0.000118 |
| CARD17    | -0.01288 | 0.864555 | 0.905973 |
| CARD18    | 0.082746 | 0.272171 | 0.380186 |
| CARD6     | 0.407754 | 1.61E-08 | 2.37E-07 |
| CARD8     | -0.17575 | 0.018944 | 0.04243  |
| CARD9     | 0.089057 | 0.237147 | 0.341094 |
| CARHSP1   | 0.115991 | 0.123116 | 0.201315 |
| CARKD     | -0.15861 | 0.034467 | 0.070387 |
| CARM1     | 0.172676 | 0.021173 | 0.04657  |
| CARNS1    | 0.405202 | 2.02E-08 | 2.88E-07 |
| CARS2     | 0.330798 | 6.49E-06 | 4.46E-05 |
| CARS      | 0.204213 | 0.006253 | 0.016561 |
| CARTPT    | -0.21626 | 0.003739 | 0.010682 |
| CASC1     | -0.23085 | 0.001934 | 0.00606  |
| CASC2     | -0.26446 | 0.000361 | 0.00144  |
| CASC3     | -0.27122 | 0.00025  | 0.001049 |
| CASC4     | -0.00507 | 0.946465 | 0.963933 |
| CASC5     | 0.225514 | 0.002473 | 0.007488 |
| CASD1     | -0.52874 | 3.29E-14 | 2.16E-12 |
| CASKIN1   | -0.35175 | 1.47E-06 | 1.21E-05 |
| CASKIN2   | -0.19041 | 0.010904 | 0.026603 |
| CASK      | 0.130195 | 0.083246 | 0.146856 |
| CASP10    | 0.37569  | 2.37E-07 | 2.49E-06 |
| CASP12    | -0.18453 | 0.013672 | 0.032241 |
| CASP14    | 0.233163 | 0.001735 | 0.005524 |
| CASP1     | 0.27983  | 0.000155 | 0.000696 |
| CASP2     | 0.126979 | 0.091216 | 0.158144 |
| CASP3     | 0.107513 | 0.153167 | 0.240432 |
| CASP4     | 0.435133 | 1.28E-09 | 2.61E-08 |
| CASP5     | -0.07443 | 0.323473 | 0.435492 |
| CASP6     | 0.311383 | 2.33E-05 | 0.000135 |
| CASP7     | 0.140825 | 0.060798 | 0.112842 |
| CASP8AP2  | -0.26431 | 0.000364 | 0.001449 |
| CASP8     | 0.370995 | 3.43E-07 | 3.44E-06 |
| CASP9     | -0.04835 | 0.521607 | 0.627159 |
| CASQ1     | -0.05376 | 0.476042 | 0.585693 |
| CASQ2     | -0.0089  | 0.906097 | 0.9345   |
| CASR      | 0.045965 | 0.542354 | 0.645473 |
| CASS4     | -0.10368 | 0.168439 | 0.259528 |
| CAST      | 0.38038  | 1.63E-07 | 1.80E-06 |
| CASZ1     | 0.086292 | 0.252081 | 0.357946 |
| CATSPER1  | 0.562135 | 3.23E-16 | 3.47E-14 |
| CATSPER2F | 0.085105 | 0.258692 | 0.365072 |
| CATSPER2  | 0.110251 | 0.142912 | 0.22722  |
| CATSPER3  | -0.18203 | 0.015025 | 0.034897 |



|          |          |          |          |
|----------|----------|----------|----------|
| CATSPER4 | 0.110072 | 0.143563 | 0.228018 |
| CATSPERB | 0.274216 | 0.000212 | 0.000909 |
| CATSPERG | 0.059191 | 0.432555 | 0.544313 |
| CAT      | 0.021409 | 0.776678 | 0.841444 |
| CAV1     | 0.161775 | 0.030976 | 0.064341 |
| CAV2     | 0.414894 | 8.51E-09 | 1.38E-07 |
| CAV3     | -0.08514 | 0.258477 | 0.36495  |
| CBARA1   | 0.258068 | 0.000505 | 0.001918 |
| CBFA2T2  | -0.49201 | 3.07E-12 | 1.25E-10 |
| CBFA2T3  | -0.36654 | 4.85E-07 | 4.62E-06 |
| CBFB     | 0.171105 | 0.022394 | 0.048812 |
| CBLB     | 0.047314 | 0.530561 | 0.634914 |
| CBLC     | 0.533622 | 1.73E-14 | 1.22E-12 |
| CBLL1    | -0.28836 | 9.49E-05 | 0.000453 |
| CBLN1    | -0.29073 | 8.26E-05 | 0.000402 |
| CBLN2    | -0.15075 | 0.044579 | 0.087339 |
| CBLN3    | 0.038875 | 0.606415 | 0.702351 |
| CBLN4    | -0.14131 | 0.059908 | 0.111452 |
| CBL      | -0.02773 | 0.71331  | 0.791468 |
| CBR1     | 0.29318  | 7.14E-05 | 0.000355 |
| CBR3     | 0.318227 | 1.50E-05 | 9.24E-05 |
| CBR4     | -0.2657  | 0.000338 | 0.001357 |
| CBS      | -0.09586 | 0.203053 | 0.30171  |
| CBWD1    | -0.14715 | 0.04998  | 0.095942 |
| CBWD2    | 0.115516 | 0.12467  | 0.203469 |
| CBWD3    | 0.034652 | 0.646096 | 0.736152 |
| CBWD5    | -0.22322 | 0.002744 | 0.008186 |
| CBWD6    | -0.0188  | 0.803342 | 0.861364 |
| CBX1     | -0.2242  | 0.002625 | 0.007877 |
| CBX2     | -0.31306 | 2.09E-05 | 0.000123 |
| CBX3     | 0.340165 | 3.39E-06 | 2.53E-05 |
| CBX4     | 0.04225  | 0.575503 | 0.67487  |
| CBX5     | -0.5686  | 1.24E-16 | 1.50E-14 |
| CBX6     | -0.42061 | 5.05E-09 | 8.75E-08 |
| CBX7     | -0.40631 | 1.83E-08 | 2.66E-07 |
| CBX8     | -0.02494 | 0.741066 | 0.813244 |
| CBY1     | -0.07225 | 0.33784  | 0.450196 |
| CC2D1A   | 0.189338 | 0.011366 | 0.027554 |
| CC2D1B   | 0.225826 | 0.002438 | 0.007396 |
| CC2D2A   | -0.09082 | 0.227967 | 0.330728 |
| CC2D2B   | 0.037198 | 0.622041 | 0.716004 |
| CCAR1    | -0.0857  | 0.255346 | 0.361718 |
| CCBE1    | -0.14628 | 0.051377 | 0.098217 |
| CCBL1    | 0.371679 | 3.25E-07 | 3.28E-06 |
| CCBL2    | 0.279659 | 0.000156 | 0.000702 |
| CCBP2    | -0.20285 | 0.006615 | 0.017397 |
| CCDC101  | 0.019546 | 0.795661 | 0.855752 |
| CCDC102A | 0.255859 | 0.000567 | 0.002116 |
| CCDC102B | -0.18084 | 0.015704 | 0.036223 |
| CCDC103  | -0.15503 | 0.038804 | 0.077654 |
| CCDC104  | -0.12268 | 0.102813 | 0.174614 |
| CCDC105  | -0.02551 | 0.735404 | 0.808781 |
| CCDC106  | -0.04832 | 0.52186  | 0.627387 |
| CCDC107  | 0.127903 | 0.088865 | 0.154849 |

|           |          |          |          |
|-----------|----------|----------|----------|
| CCDC108   | -0.02126 | 0.778145 | 0.842612 |
| CCDC109A  | 0.412728 | 1.03E-08 | 1.62E-07 |
| CCDC109B  | 0.265815 | 0.000336 | 0.001349 |
| CCDC110   | -0.45482 | 1.80E-10 | 4.73E-09 |
| CCDC111   | -0.38649 | 9.90E-08 | 1.15E-06 |
| CCDC112   | -0.2464  | 0.000915 | 0.003181 |
| CCDC113   | -0.15518 | 0.03861  | 0.077338 |
| CCDC114   | 0.076747 | 0.308572 | 0.419044 |
| CCDC115   | 0.351134 | 1.54E-06 | 1.26E-05 |
| CCDC116   | -0.00507 | 0.946459 | 0.963933 |
| CCDC117   | -0.44041 | 7.66E-10 | 1.69E-08 |
| CCDC11    | -0.3564  | 1.05E-06 | 9.04E-06 |
| CCDC120   | 0.398732 | 3.54E-08 | 4.69E-07 |
| CCDC121   | -0.40204 | 2.66E-08 | 3.67E-07 |
| CCDC122   | -0.18741 | 0.012248 | 0.02937  |
| CCDC123   | 0.149044 | 0.047079 | 0.091384 |
| CCDC124   | 0.215207 | 0.003916 | 0.011116 |
| CCDC125   | 0.089277 | 0.235986 | 0.339943 |
| CCDC126   | -0.40931 | 1.40E-08 | 2.11E-07 |
| CCDC127   | -0.0386  | 0.60892  | 0.704592 |
| CCDC129   | 0.015631 | 0.83594  | 0.884045 |
| CCDC12    | 0.261172 | 0.00043  | 0.00167  |
| CCDC130   | 0.198279 | 0.007975 | 0.020388 |
| CCDC132   | -0.21155 | 0.004588 | 0.01272  |
| CCDC134   | -0.19449 | 0.009284 | 0.023163 |
| CCDC135   | -0.17511 | 0.019393 | 0.043249 |
| CCDC136   | -0.08357 | 0.267407 | 0.374988 |
| CCDC137   | 0.152067 | 0.042731 | 0.084295 |
| CCDC138   | 0.172629 | 0.021208 | 0.046632 |
| CCDC13    | -0.28667 | 0.000105 | 0.000495 |
| CCDC140   | 0.087504 | 0.245456 | 0.350343 |
| CCDC141   | -0.25165 | 0.000703 | 0.002541 |
| CCDC142   | -0.05712 | 0.448861 | 0.559931 |
| CCDC144A  | -0.10693 | 0.1554   | 0.243338 |
| CCDC144B  | -0.19395 | 0.009484 | 0.0236   |
| CCDC144C  | -0.05235 | 0.487647 | 0.596361 |
| CCDC144NI | -0.22731 | 0.002278 | 0.006981 |
| CCDC146   | 0.13358  | 0.075469 | 0.135474 |
| CCDC147   | -0.02854 | 0.705308 | 0.785284 |
| CCDC148   | -0.05199 | 0.490728 | 0.599287 |
| CCDC149   | -0.54244 | 5.25E-15 | 4.09E-13 |
| CCDC14    | 0.209697 | 0.004965 | 0.013615 |
| CCDC150   | 0.114963 | 0.126498 | 0.205924 |
| CCDC151   | -0.23216 | 0.001819 | 0.005749 |
| CCDC152   | -0.12771 | 0.08936  | 0.155478 |
| CCDC153   | 0.497771 | 1.56E-12 | 6.91E-11 |
| CCDC154   | -0.01612 | 0.830937 | 0.880166 |
| CCDC155   | -0.18871 | 0.011649 | 0.028125 |
| CCDC157   | -0.07413 | 0.325426 | 0.437518 |
| CCDC158   | -0.34498 | 2.41E-06 | 1.87E-05 |
| CCDC159   | 0.105386 | 0.161507 | 0.250756 |
| CCDC15    | 0.176613 | 0.01836  | 0.041274 |
| CCDC160   | 0.107229 | 0.154261 | 0.241804 |
| CCDC163P  | -0.16816 | 0.024852 | 0.053358 |

|         |          |          |          |
|---------|----------|----------|----------|
| CCDC17  | 0.142008 | 0.058642 | 0.109519 |
| CCDC18  | 0.165417 | 0.027341 | 0.057891 |
| CCDC19  | 0.079503 | 0.291468 | 0.401106 |
| CCDC21  | -0.16224 | 0.030494 | 0.063526 |
| CCDC22  | 0.073775 | 0.327735 | 0.439603 |
| CCDC23  | -0.06173 | 0.413045 | 0.525076 |
| CCDC24  | 0.161816 | 0.030933 | 0.064277 |
| CCDC25  | -0.09013 | 0.231497 | 0.335062 |
| CCDC27  | -0.08269 | 0.272471 | 0.380497 |
| CCDC28A | -0.22451 | 0.002588 | 0.007785 |
| CCDC28B | -0.11435 | 0.128538 | 0.208593 |
| CCDC30  | -0.28928 | 8.99E-05 | 0.000433 |
| CCDC33  | 0.116573 | 0.121236 | 0.198815 |
| CCDC34  | 0.005968 | 0.936979 | 0.957213 |
| CCDC36  | 0.002259 | 0.976128 | 0.983589 |
| CCDC37  | -0.0485  | 0.520301 | 0.6259   |
| CCDC38  | -0.17084 | 0.022603 | 0.049212 |
| CCDC39  | -0.13295 | 0.076865 | 0.137502 |
| CCDC3   | -0.26794 | 0.000299 | 0.001226 |
| CCDC40  | -0.28005 | 0.000153 | 0.000689 |
| CCDC41  | -0.34662 | 2.14E-06 | 1.69E-05 |
| CCDC42B | 0.393686 | 5.43E-08 | 6.84E-07 |
| CCDC42  | -0.06184 | 0.412207 | 0.524246 |
| CCDC43  | 0.252037 | 0.000689 | 0.002497 |
| CCDC45  | 0.099674 | 0.185586 | 0.280007 |
| CCDC46  | -0.31985 | 1.35E-05 | 8.41E-05 |
| CCDC47  | -0.1654  | 0.027359 | 0.057911 |
| CCDC48  | -0.1565  | 0.036972 | 0.074639 |
| CCDC50  | 0.154326 | 0.039705 | 0.079235 |
| CCDC51  | 0.292882 | 7.27E-05 | 0.00036  |
| CCDC52  | 0.246179 | 0.000925 | 0.00321  |
| CCDC53  | 0.067757 | 0.368833 | 0.482258 |
| CCDC54  | 0.032125 | 0.670335 | 0.757441 |
| CCDC55  | 0.012582 | 0.867615 | 0.908602 |
| CCDC56  | -0.11495 | 0.126525 | 0.205951 |
| CCDC57  | 0.05781  | 0.443386 | 0.555082 |
| CCDC58  | 0.316679 | 1.66E-05 | 0.000101 |
| CCDC59  | -0.07918 | 0.293448 | 0.403214 |
| CCDC60  | -0.15655 | 0.036901 | 0.074502 |
| CCDC61  | 0.363732 | 6.02E-07 | 5.59E-06 |
| CCDC62  | -0.4195  | 5.59E-09 | 9.54E-08 |
| CCDC63  | 0.170606 | 0.022795 | 0.049572 |
| CCDC64B | 0.482089 | 9.53E-12 | 3.43E-10 |
| CCDC64  | -0.04808 | 0.523916 | 0.629361 |
| CCDC65  | -0.34268 | 2.84E-06 | 2.17E-05 |
| CCDC66  | -0.25553 | 0.000576 | 0.002146 |
| CCDC67  | -0.15765 | 0.035584 | 0.072293 |
| CCDC68  | 0.364594 | 5.63E-07 | 5.29E-06 |
| CCDC69  | -0.14541 | 0.052789 | 0.100449 |
| CCDC6   | 0.266484 | 0.000324 | 0.00131  |
| CCDC70  | 0.166422 | 0.026405 | 0.056209 |
| CCDC71  | -0.01256 | 0.867837 | 0.908738 |
| CCDC72  | -0.03021 | 0.688966 | 0.772226 |
| CCDC73  | 0.13926  | 0.063752 | 0.117559 |

|           |          |          |          |
|-----------|----------|----------|----------|
| CCDC74A   | 0.345227 | 2.37E-06 | 1.84E-05 |
| CCDC74B   | 0.03581  | 0.635106 | 0.726728 |
| CCDC75    | -0.2346  | 0.001622 | 0.005213 |
| CCDC76    | -0.04342 | 0.564992 | 0.665604 |
| CCDC77    | -0.23789 | 0.001386 | 0.004552 |
| CCDC78    | 0.171779 | 0.021863 | 0.047814 |
| CCDC79    | -0.03472 | 0.64542  | 0.735592 |
| CCDC7     | -0.16046 | 0.03239  | 0.066808 |
| CCDC80    | 0.020382 | 0.787126 | 0.849134 |
| CCDC81    | 0.110616 | 0.141585 | 0.225557 |
| CCDC82    | 0.05683  | 0.451163 | 0.561935 |
| CCDC83    | -0.13539 | 0.071556 | 0.129633 |
| CCDC84    | 0.25881  | 0.000486 | 0.001857 |
| CCDC85A   | -0.11641 | 0.121775 | 0.199551 |
| CCDC85B   | 0.222535 | 0.00283  | 0.00841  |
| CCDC85C   | -0.09231 | 0.220365 | 0.322133 |
| CCDC86    | -0.00873 | 0.907946 | 0.935747 |
| CCDC87    | -0.28638 | 0.000106 | 0.000501 |
| CCDC88A   | 0.004938 | 0.947838 | 0.964718 |
| CCDC88B   | 0.398995 | 3.46E-08 | 4.60E-07 |
| CCDC88C   | 0.202852 | 0.006615 | 0.017397 |
| CCDC89    | -0.08863 | 0.239399 | 0.343682 |
| CCDC8     | 0.09429  | 0.210601 | 0.3108   |
| CCDC90A   | -0.09134 | 0.225315 | 0.327674 |
| CCDC90B   | 0.273191 | 0.000225 | 0.000955 |
| CCDC91    | -0.19797 | 0.008076 | 0.020611 |
| CCDC92    | -0.26689 | 0.000317 | 0.001286 |
| CCDC93    | -0.30999 | 2.54E-05 | 0.000146 |
| CCDC94    | 0.016631 | 0.825607 | 0.876446 |
| CCDC96    | -0.18655 | 0.012658 | 0.030201 |
| CCDC97    | -0.04524 | 0.548792 | 0.651253 |
| CCDC99    | 0.052433 | 0.486993 | 0.59583  |
| CCDC9     | 0.247545 | 0.000864 | 0.003033 |
| CCHCR1    | 0.288751 | 9.27E-05 | 0.000445 |
| CCIN      | -0.09229 | 0.220476 | 0.322272 |
| CCKAR     | -0.27457 | 0.000208 | 0.000895 |
| CCKBR     | -0.18635 | 0.012754 | 0.030397 |
| CCK       | 0.24812  | 0.00084  | 0.002958 |
| CCL11     | -0.00726 | 0.923347 | 0.946809 |
| CCL13     | 0.159349 | 0.03362  | 0.068928 |
| CCL14-CCI | -0.03797 | 0.614857 | 0.709978 |
| CCL14     | -0.18756 | 0.012173 | 0.029216 |
| CCL15     | 0.063557 | 0.39932  | 0.511839 |
| CCL16     | -0.23202 | 0.001831 | 0.00578  |
| CCL17     | 0.170765 | 0.022667 | 0.049319 |
| CCL18     | 0.19582  | 0.008804 | 0.022147 |
| CCL19     | 0.044176 | 0.558202 | 0.659263 |
| CCL1      | -0.04912 | 0.515    | 0.621066 |
| CCL20     | 0.331873 | 6.03E-06 | 4.20E-05 |
| CCL21     | -0.02626 | 0.727901 | 0.80303  |
| CCL22     | 0.21611  | 0.003764 | 0.010743 |
| CCL23     | -0.06    | 0.426286 | 0.538516 |
| CCL24     | 0.019344 | 0.797731 | 0.857487 |
| CCL25     | -0.03502 | 0.642618 | 0.733499 |

|          |          |          |          |
|----------|----------|----------|----------|
| CCL26    | -0.07818 | 0.299607 | 0.40974  |
| CCL27    | -0.01244 | 0.869118 | 0.909838 |
| CCL28    | 0.221108 | 0.003017 | 0.008894 |
| CCL2     | -0.08219 | 0.27541  | 0.383381 |
| CCL3L1   | -0.04837 | 0.521428 | 0.62702  |
| CCL3L3   | -0.27488 | 0.000205 | 0.000882 |
| CCL3     | -0.06508 | 0.388079 | 0.500742 |
| CCL4L2   | -0.06983 | 0.354335 | 0.467326 |
| CCL4     | -0.12202 | 0.104674 | 0.177287 |
| CCL5     | 0.018757 | 0.803746 | 0.861571 |
| CCL7     | 0.223287 | 0.002736 | 0.008164 |
| CCL8     | -0.13936 | 0.063554 | 0.117276 |
| CCM2     | -0.02542 | 0.736231 | 0.809375 |
| CCNA1    | -0.33323 | 5.49E-06 | 3.86E-05 |
| CCNA2    | 0.303693 | 3.77E-05 | 0.000205 |
| CCNB1IP1 | -0.11522 | 0.125658 | 0.204879 |
| CCNB1    | 0.301031 | 4.44E-05 | 0.000237 |
| CCNB2    | 0.429103 | 2.28E-09 | 4.35E-08 |
| CCNB3    | 0.046873 | 0.534407 | 0.638097 |
| CCNC     | -0.26362 | 0.000377 | 0.001493 |
| CCND1    | 0.3813   | 1.51E-07 | 1.68E-06 |
| CCND2    | -0.40576 | 1.92E-08 | 2.77E-07 |
| CCND3    | 0.003233 | 0.96584  | 0.976806 |
| CCNDBP1  | 0.236597 | 0.001475 | 0.004798 |
| CCNE1    | 0.263821 | 0.000373 | 0.001481 |
| CCNE2    | 0.113055 | 0.132958 | 0.214323 |
| CCNF     | 0.189906 | 0.011118 | 0.027049 |
| CCNG1    | -0.09419 | 0.211078 | 0.311342 |
| CCNG2    | 0.172868 | 0.021027 | 0.046318 |
| CCNH     | 0.067128 | 0.373305 | 0.48644  |
| CCNI2    | 0.359309 | 8.41E-07 | 7.47E-06 |
| CCNI     | -0.21688 | 0.00364  | 0.010427 |
| CCNJL    | 0.002521 | 0.973355 | 0.981896 |
| CCNJ     | -0.11855 | 0.115007 | 0.190944 |
| CCNK     | 0.186066 | 0.012893 | 0.030662 |
| CCNL1    | 0.172925 | 0.020984 | 0.046243 |
| CCNL2    | 0.183504 | 0.014212 | 0.033294 |
| CCNO     | 0.316409 | 1.69E-05 | 0.000102 |
| CCNT1    | -0.27762 | 0.000176 | 0.000773 |
| CCNT2    | -0.05748 | 0.445991 | 0.557355 |
| CCNYL1   | 0.17907  | 0.016774 | 0.038279 |
| CCNY     | -0.1802  | 0.016087 | 0.036972 |
| CCPG1    | -0.31247 | 2.17E-05 | 0.000127 |
| CCR10    | 0.032658 | 0.665194 | 0.752922 |
| CCR1     | -0.00982 | 0.896509 | 0.927902 |
| CCR2     | -0.06857 | 0.36312  | 0.47634  |
| CCR3     | 0.001875 | 0.980182 | 0.986267 |
| CCR4     | -0.06973 | 0.355029 | 0.46796  |
| CCR5     | -0.04688 | 0.534355 | 0.638097 |
| CCR6     | 0.000409 | 0.995672 | 0.996932 |
| CCR7     | -0.03264 | 0.665395 | 0.75302  |
| CCR8     | -0.05641 | 0.454528 | 0.565557 |
| CCR9     | 0.229755 | 0.002035 | 0.006327 |
| CCRL1    | 0.383343 | 1.28E-07 | 1.45E-06 |

|          |          |          |          |
|----------|----------|----------|----------|
| CCRL2    | 0.331794 | 6.06E-06 | 4.21E-05 |
| CCRN4L   | -0.22307 | 0.002763 | 0.008238 |
| CCS      | 0.279168 | 0.000161 | 0.000719 |
| CCT2     | -0.11224 | 0.135791 | 0.218107 |
| CCT3     | 0.126171 | 0.093311 | 0.161076 |
| CCT4     | 0.063705 | 0.398219 | 0.510959 |
| CCT5     | 0.128031 | 0.088545 | 0.154372 |
| CCT6A    | -0.01789 | 0.812636 | 0.867332 |
| CCT6B    | -0.12125 | 0.106922 | 0.180399 |
| CCT6P1   | 0.035514 | 0.637907 | 0.729469 |
| CCT7     | 0.088532 | 0.239932 | 0.344248 |
| CCT8L2   | 0.039451 | 0.601088 | 0.697448 |
| CCT8     | 0.116886 | 0.120233 | 0.197679 |
| CD101    | 0.094921 | 0.207551 | 0.306964 |
| CD109    | 0.207722 | 0.005398 | 0.014607 |
| CD14     | -0.0355  | 0.638072 | 0.729572 |
| CD151    | 0.480481 | 1.14E-11 | 4.03E-10 |
| CD160    | -0.24894 | 0.000806 | 0.002864 |
| CD163L1  | -0.03346 | 0.657485 | 0.746075 |
| CD163    | -0.08792 | 0.243193 | 0.347824 |
| CD164L2  | 0.248677 | 0.000817 | 0.002895 |
| CD164    | -0.01894 | 0.801848 | 0.860462 |
| CD177    | 0.157943 | 0.035238 | 0.071687 |
| CD180    | 0.062478 | 0.407391 | 0.519625 |
| CD19     | -0.02718 | 0.718793 | 0.795468 |
| CD1A     | 0.311111 | 2.37E-05 | 0.000137 |
| CD1B     | -0.06704 | 0.373909 | 0.486971 |
| CD1C     | 0.136769 | 0.068693 | 0.125239 |
| CD1D     | -0.02539 | 0.736561 | 0.809602 |
| CD1E     | 0.085316 | 0.257504 | 0.363871 |
| CD200R1L | -0.05107 | 0.498377 | 0.605822 |
| CD200R1  | -0.25951 | 0.000469 | 0.001796 |
| CD200    | -0.29506 | 6.38E-05 | 0.000322 |
| CD207    | 0.268062 | 0.000297 | 0.001219 |
| CD209    | -0.2845  | 0.000119 | 0.000553 |
| CD226    | -0.14998 | 0.045698 | 0.089169 |
| CD22     | 0.008953 | 0.905581 | 0.934162 |
| CD244    | -0.06123 | 0.416862 | 0.529282 |
| CD247    | -0.05531 | 0.463396 | 0.573632 |
| CD248    | 0.14189  | 0.058853 | 0.10982  |
| CD24     | 0.246082 | 0.000929 | 0.003224 |
| CD274    | -0.12232 | 0.103825 | 0.17606  |
| CD276    | 0.207618 | 0.005422 | 0.014659 |
| CD27     | 0.041682 | 0.580658 | 0.679605 |
| CD28     | -0.06189 | 0.411814 | 0.523881 |
| CD2AP    | 0.293469 | 7.02E-05 | 0.00035  |
| CD2BP2   | 0.209827 | 0.004937 | 0.013549 |
| CD2      | #####    | 0.999967 | 0.999967 |
| CD300A   | 0.129845 | 0.084083 | 0.148095 |
| CD300C   | 0.127488 | 0.089916 | 0.156301 |
| CD300E   | -0.1701  | 0.02321  | 0.050369 |
| CD300LB  | 0.003247 | 0.965689 | 0.976806 |
| CD300LD  | 0.072234 | 0.337969 | 0.450263 |
| CD300LF  | 0.227225 | 0.002287 | 0.007004 |

|         |          |          |          |
|---------|----------|----------|----------|
| CD300LG | -0.34218 | 2.94E-06 | 2.24E-05 |
| CD302   | -0.29194 | 7.69E-05 | 0.000378 |
| CD320   | -0.23349 | 0.001709 | 0.005455 |
| CD33    | 0.046325 | 0.539195 | 0.642407 |
| CD34    | -0.17242 | 0.021367 | 0.046917 |
| CD36    | -0.2743  | 0.000211 | 0.000906 |
| CD37    | 0.075761 | 0.314849 | 0.42593  |
| CD38    | 0.024205 | 0.748434 | 0.819239 |
| CD3D    | 0.060048 | 0.425909 | 0.538108 |
| CD3EAP  | 0.15565  | 0.038018 | 0.076346 |
| CD3E    | -0.01002 | 0.894438 | 0.926369 |
| CD3G    | -0.06562 | 0.38417  | 0.496963 |
| CD40LG  | -0.09152 | 0.224381 | 0.326662 |
| CD40    | 0.255182 | 0.000587 | 0.002179 |
| CD44    | 0.228983 | 0.002109 | 0.006532 |
| CD46    | -0.00091 | 0.990403 | 0.992914 |
| CD47    | 0.179224 | 0.016679 | 0.038123 |
| CD48    | -0.00763 | 0.919453 | 0.944279 |
| CD4     | 0.00962  | 0.898587 | 0.929269 |
| CD52    | 0.110162 | 0.143236 | 0.227608 |
| CD53    | 0.024992 | 0.74054  | 0.812847 |
| CD55    | 0.31484  | 1.87E-05 | 0.000112 |
| CD58    | 0.561371 | 3.61E-16 | 3.78E-14 |
| CD59    | 0.376841 | 2.16E-07 | 2.30E-06 |
| CD5L    | -0.17301 | 0.02092  | 0.046111 |
| CD5     | -0.07686 | 0.307878 | 0.418356 |
| CD63    | 0.116383 | 0.121847 | 0.199652 |
| CD68    | 0.293625 | 6.95E-05 | 0.000347 |
| CD69    | -0.0034  | 0.964118 | 0.975694 |
| CD6     | -0.00436 | 0.953957 | 0.968504 |
| CD70    | 0.287733 | 9.84E-05 | 0.000468 |
| CD72    | 0.081743 | 0.278044 | 0.38618  |
| CD74    | 0.147582 | 0.049311 | 0.094907 |
| CD79A   | 0.050758 | 0.501034 | 0.608201 |
| CD79B   | -0.04706 | 0.532746 | 0.636873 |
| CD7     | 0.025587 | 0.73459  | 0.808155 |
| CD80    | 0.185388 | 0.013232 | 0.031354 |
| CD81    | -0.03859 | 0.609101 | 0.704678 |
| CD82    | 0.346485 | 2.16E-06 | 1.70E-05 |
| CD83    | -0.03128 | 0.678533 | 0.763722 |
| CD84    | -0.07853 | 0.297448 | 0.407407 |
| CD86    | 0.079751 | 0.289961 | 0.399443 |
| CD8A    | -0.09339 | 0.215032 | 0.315931 |
| CD8B    | -0.05174 | 0.49276  | 0.601212 |
| CD93    | -0.19393 | 0.009492 | 0.023615 |
| CD96    | -0.05708 | 0.449139 | 0.56018  |
| CD97    | 0.492672 | 2.84E-12 | 1.17E-10 |
| CD99L2  | -0.4312  | 1.87E-09 | 3.64E-08 |
| CD99    | -0.10425 | 0.166102 | 0.256542 |
| CD9     | 0.263909 | 0.000372 | 0.001475 |
| CDADC1  | -0.23645 | 0.001485 | 0.004826 |
| CDAN1   | -0.05279 | 0.484026 | 0.593044 |
| CDA     | 0.436004 | 1.18E-09 | 2.43E-08 |
| CDC123  | 0.230371 | 0.001977 | 0.006175 |

|          |          |          |          |
|----------|----------|----------|----------|
| CDC14A   | -0.11005 | 0.143649 | 0.228135 |
| CDC14B   | 0.014279 | 0.849952 | 0.894939 |
| CDC14C   | -0.10739 | 0.153626 | 0.240999 |
| CDC16    | 0.203453 | 0.006453 | 0.017025 |
| CDC20B   | 0.177042 | 0.018074 | 0.040734 |
| CDC20    | 0.417879 | 6.49E-09 | 1.09E-07 |
| CDC23    | -0.09367 | 0.213648 | 0.314336 |
| CDC25A   | -0.00125 | 0.98677  | 0.990678 |
| CDC25B   | 0.009487 | 0.899985 | 0.9302   |
| CDC25C   | 0.40292  | 2.46E-08 | 3.45E-07 |
| CDC26    | -0.00844 | 0.910947 | 0.937657 |
| CDC27    | -0.09073 | 0.228434 | 0.331308 |
| CDC34    | 0.107443 | 0.153434 | 0.240752 |
| CDC37L1  | -0.14736 | 0.049652 | 0.095444 |
| CDC37    | 0.397939 | 3.78E-08 | 4.96E-07 |
| CDC40    | -0.45134 | 2.57E-10 | 6.46E-09 |
| CDC42BPA | 0.115951 | 0.123249 | 0.201499 |
| CDC42BPB | 0.117544 | 0.118144 | 0.195023 |
| CDC42BPG | 0.216555 | 0.003692 | 0.010553 |
| CDC42EP1 | 0.392076 | 6.22E-08 | 7.69E-07 |
| CDC42EP2 | 0.440283 | 7.76E-10 | 1.70E-08 |
| CDC42EP3 | -0.12651 | 0.092423 | 0.159878 |
| CDC42EP4 | 0.055683 | 0.460365 | 0.570765 |
| CDC42EP5 | 0.370799 | 3.49E-07 | 3.48E-06 |
| CDC42SE1 | 0.279086 | 0.000162 | 0.000722 |
| CDC42SE2 | -0.26049 | 0.000445 | 0.001722 |
| CDC42    | 0.159673 | 0.033256 | 0.068344 |
| CDC45    | 0.33504  | 4.85E-06 | 3.46E-05 |
| CDC5L    | -0.29898 | 5.04E-05 | 0.000264 |
| CDC6     | 0.353763 | 1.27E-06 | 1.07E-05 |
| CDC73    | 0.052814 | 0.483836 | 0.592953 |
| CDC7     | 0.030476 | 0.686341 | 0.769938 |
| CDCA2    | 0.380505 | 1.61E-07 | 1.78E-06 |
| CDCA3    | 0.208524 | 0.005219 | 0.0142   |
| CDCA4    | 0.328074 | 7.80E-06 | 5.23E-05 |
| CDCA5    | 0.370372 | 3.60E-07 | 3.58E-06 |
| CDCA7L   | 0.161467 | 0.031302 | 0.064894 |
| CDCA7    | 0.278865 | 0.000164 | 0.000729 |
| CDCA8    | 0.293771 | 6.89E-05 | 0.000344 |
| CDCP1    | 0.397466 | 3.94E-08 | 5.15E-07 |
| CDCP2    | 0.046314 | 0.539295 | 0.642488 |
| CDH10    | -0.22629 | 0.002386 | 0.007258 |
| CDH11    | 0.153859 | 0.040316 | 0.08025  |
| CDH12    | -0.2618  | 0.000416 | 0.001623 |
| CDH13    | -0.069   | 0.360085 | 0.473206 |
| CDH15    | 0.088001 | 0.242778 | 0.347424 |
| CDH16    | 0.156099 | 0.03746  | 0.075415 |
| CDH17    | 0.153686 | 0.040544 | 0.080631 |
| CDH18    | -0.23844 | 0.00135  | 0.004444 |
| CDH19    | -0.12356 | 0.100331 | 0.17104  |
| CDH1     | 0.294917 | 6.44E-05 | 0.000325 |
| CDH20    | -0.00062 | 0.993415 | 0.995428 |
| CDH22    | -0.0851  | 0.258711 | 0.365072 |
| CDH23    | -0.11912 | 0.113258 | 0.188706 |



|           |          |          |          |
|-----------|----------|----------|----------|
| CDH24     | 0.197569 | 0.008207 | 0.020883 |
| CDH26     | 0.012886 | 0.864445 | 0.905973 |
| CDH2      | -0.02734 | 0.717183 | 0.794575 |
| CDH3      | 0.605061 | 3.72E-19 | 8.76E-17 |
| CDH4      | -0.25287 | 0.000661 | 0.002403 |
| CDH5      | -0.23373 | 0.001689 | 0.005398 |
| CDH6      | -0.03884 | 0.606771 | 0.702641 |
| CDH7      | -0.24158 | 0.001159 | 0.003902 |
| CDH8      | -0.30204 | 4.18E-05 | 0.000225 |
| CDH9      | -0.12304 | 0.101804 | 0.173197 |
| CDHR1     | -0.14196 | 0.058736 | 0.109654 |
| CDHR2     | 0.356232 | 1.06E-06 | 9.14E-06 |
| CDHR3     | -0.32221 | 1.15E-05 | 7.37E-05 |
| CDHR4     | 0.2193   | 0.00327  | 0.009502 |
| CDHR5     | 0.331132 | 6.34E-06 | 4.38E-05 |
| CDIPT     | 0.022696 | 0.763636 | 0.831643 |
| CDK10     | 0.205769 | 0.00586  | 0.015668 |
| CDK11A    | 0.139041 | 0.064175 | 0.118133 |
| CDK11B    | 0.210992 | 0.004698 | 0.012981 |
| CDK12     | -0.03793 | 0.615195 | 0.710236 |
| CDK13     | -0.21785 | 0.003487 | 0.010036 |
| CDK14     | 0.01138  | 0.880159 | 0.916865 |
| CDK15     | -0.08682 | 0.249155 | 0.35465  |
| CDK16     | 0.21258  | 0.004388 | 0.012226 |
| CDK17     | -0.31478 | 1.87E-05 | 0.000112 |
| CDK18     | 0.507679 | 4.73E-13 | 2.41E-11 |
| CDK19     | -0.25943 | 0.000471 | 0.001803 |
| CDK1      | 0.398318 | 3.66E-08 | 4.82E-07 |
| CDK20     | -0.14437 | 0.054529 | 0.103251 |
| CDK2AP1   | 0.065129 | 0.387742 | 0.500503 |
| CDK2AP2   | 0.397526 | 3.92E-08 | 5.12E-07 |
| CDK2      | 0.293077 | 7.18E-05 | 0.000357 |
| CDK3      | 0.067633 | 0.369717 | 0.483038 |
| CDK4      | -0.01451 | 0.847571 | 0.892765 |
| CDK5R1    | -0.08955 | 0.23457  | 0.338576 |
| CDK5R2    | -0.22145 | 0.002972 | 0.008777 |
| CDK5RAP1  | -0.04885 | 0.517326 | 0.623234 |
| CDK5RAP2  | -0.17058 | 0.022814 | 0.049602 |
| CDK5RAP3  | 0.228261 | 0.00218  | 0.006725 |
| CDK5      | 0.079526 | 0.291329 | 0.400971 |
| CDK6      | 0.275449 | 0.000198 | 0.00086  |
| CDK7      | 0.379855 | 1.70E-07 | 1.86E-06 |
| CDK8      | -0.06094 | 0.419041 | 0.531298 |
| CDK9      | -0.05481 | 0.467444 | 0.577558 |
| CDKAL1    | -0.22081 | 0.003058 | 0.00898  |
| CDKL1     | 0.036169 | 0.631718 | 0.723857 |
| CDKL2     | -0.33457 | 5.01E-06 | 3.57E-05 |
| CDKL3     | -0.25029 | 0.000753 | 0.002699 |
| CDKL4     | -0.03149 | 0.676453 | 0.762306 |
| CDKL5     | -0.1617  | 0.031059 | 0.064485 |
| CDKN1A    | 0.222863 | 0.002789 | 0.008301 |
| CDKN1B    | -0.20773 | 0.005396 | 0.014603 |
| CDKN1C    | 0.182166 | 0.014946 | 0.034725 |
| CDKN2AIPN | -0.29806 | 5.33E-05 | 0.000277 |

|           |          |          |          |
|-----------|----------|----------|----------|
| CDKN2AIP  | -0.0844  | 0.26269  | 0.369684 |
| CDKN2A    | 0.122772 | 0.102547 | 0.174237 |
| CDKN2BAS  | 0.013261 | 0.860546 | 0.903064 |
| CDKN2B    | 0.173371 | 0.020651 | 0.045625 |
| CDKN2C    | -0.0625  | 0.407245 | 0.51954  |
| CDKN2D    | 0.227046 | 0.002306 | 0.007052 |
| CDKN3     | 0.25323  | 0.000649 | 0.002367 |
| CDNF      | -0.2545  | 0.000608 | 0.002242 |
| CDO1      | -0.2952  | 6.33E-05 | 0.00032  |
| CDON      | -0.22078 | 0.003062 | 0.008989 |
| CDR1      | -0.13988 | 0.062572 | 0.11569  |
| CDR2L     | 0.559548 | 4.70E-16 | 4.73E-14 |
| CDR2      | 0.107826 | 0.151965 | 0.238829 |
| CDRT15P   | -0.10823 | 0.150416 | 0.236809 |
| CDRT15    | 0.032689 | 0.664893 | 0.752673 |
| CDRT1     | 0.402289 | 2.60E-08 | 3.60E-07 |
| CDRT4     | -0.2514  | 0.000712 | 0.002569 |
| CDS1      | 0.233871 | 0.001678 | 0.005367 |
| CDS2      | -0.29422 | 6.71E-05 | 0.000337 |
| CDSN      | 0.518334 | 1.26E-13 | 7.27E-12 |
| CDT1      | 0.292014 | 7.65E-05 | 0.000377 |
| CDV3      | 0.005735 | 0.939439 | 0.959131 |
| CDX1      | 0.034858 | 0.644133 | 0.734302 |
| CDX2      | 0.11516  | 0.125844 | 0.205114 |
| CDY2B     | -0.19172 | 0.010357 | 0.025442 |
| CDYL2     | -0.23783 | 0.00139  | 0.004561 |
| CDYL      | -0.01827 | 0.808711 | 0.864555 |
| CEACAM16  | -0.12071 | 0.108483 | 0.182456 |
| CEACAM18  | 0.203413 | 0.006464 | 0.017051 |
| CEACAM19  | -0.09365 | 0.213728 | 0.31443  |
| CEACAM1   | 0.371779 | 3.23E-07 | 3.26E-06 |
| CEACAM20  | 0.073046 | 0.33255  | 0.444755 |
| CEACAM21  | 0.044354 | 0.556614 | 0.657967 |
| CEACAM22F | 0.104592 | 0.164707 | 0.254825 |
| CEACAM3   | 0.112    | 0.136637 | 0.219235 |
| CEACAM4   | 0.011159 | 0.882476 | 0.918328 |
| CEACAM5   | 0.461312 | 9.14E-11 | 2.59E-09 |
| CEACAM6   | 0.518959 | 1.16E-13 | 6.76E-12 |
| CEACAM7   | 0.15275  | 0.041797 | 0.082715 |
| CEACAM8   | 0.129817 | 0.084153 | 0.148191 |
| CEBPA     | 0.019651 | 0.794586 | 0.85485  |
| CEBPB     | 0.388652 | 8.28E-08 | 9.90E-07 |
| CEBPD     | 0.035997 | 0.633342 | 0.725129 |
| CEBPE     | 0.077131 | 0.306152 | 0.416415 |
| CEBPG     | 0.055366 | 0.462925 | 0.573192 |
| CEBPZ     | 0.016233 | 0.829715 | 0.879437 |
| CECR1     | -0.13989 | 0.062557 | 0.115683 |
| CECR2     | -0.27039 | 0.000262 | 0.001093 |
| CECR4     | -0.22562 | 0.002461 | 0.007459 |
| CECR5     | -0.1086  | 0.149019 | 0.235077 |
| CECR6     | -0.34604 | 2.23E-06 | 1.75E-05 |
| CECR7     | -0.12136 | 0.106597 | 0.179974 |
| CELA1     | -0.12083 | 0.108145 | 0.182015 |
| CELA2A    | -0.09207 | 0.221574 | 0.323541 |

|         |          |          |          |
|---------|----------|----------|----------|
| CELA2B  | -0.08702 | 0.248101 | 0.353403 |
| CELA3A  | -0.02094 | 0.781461 | 0.844774 |
| CELA3B  | -0.05714 | 0.448693 | 0.559847 |
| CELF1   | -0.03179 | 0.673598 | 0.759998 |
| CELF2   | -0.22866 | 0.002141 | 0.006622 |
| CELF3   | -0.23274 | 0.00177  | 0.005619 |
| CELF4   | -0.30495 | 3.49E-05 | 0.000192 |
| CELF5   | -0.30464 | 3.56E-05 | 0.000195 |
| CELF6   | -0.22275 | 0.002803 | 0.008339 |
| CELP    | -0.11964 | 0.111673 | 0.186774 |
| CELSR1  | 0.340572 | 3.29E-06 | 2.47E-05 |
| CELSR2  | -0.28985 | 8.69E-05 | 0.000421 |
| CELSR3  | -0.07587 | 0.314158 | 0.425141 |
| CEL     | -0.10494 | 0.16331  | 0.25304  |
| CEMP1   | 0.182212 | 0.014921 | 0.034686 |
| CEND1   | -0.12986 | 0.084057 | 0.148075 |
| CENPA   | 0.337619 | 4.05E-06 | 2.96E-05 |
| CENPBD1 | -0.30091 | 4.48E-05 | 0.000239 |
| CENPB   | 0.016394 | 0.828051 | 0.878313 |
| CENPC1  | -0.20694 | 0.00558  | 0.015022 |
| CENPE   | 0.303809 | 3.75E-05 | 0.000204 |
| CENPF   | 0.335048 | 4.84E-06 | 3.46E-05 |
| CENPH   | 0.174298 | 0.019971 | 0.044385 |
| CENPI   | 0.165074 | 0.027668 | 0.058452 |
| CENPJ   | 0.0576   | 0.445045 | 0.556525 |
| CENPK   | 0.388458 | 8.41E-08 | 1.00E-06 |
| CENPL   | 0.089545 | 0.234576 | 0.338576 |
| CENPM   | 0.324725 | 9.77E-06 | 6.36E-05 |
| CENPN   | 0.130838 | 0.081722 | 0.144786 |
| CENPO   | 0.037928 | 0.615221 | 0.710236 |
| CENPP   | 0.055651 | 0.460624 | 0.570915 |
| CENPQ   | -0.20605 | 0.005791 | 0.015509 |
| CENPT   | 0.147567 | 0.049335 | 0.094934 |
| CENPV   | 0.134563 | 0.073325 | 0.132172 |
| CENPW   | 0.282778 | 0.000131 | 0.000602 |
| CEP110  | -0.27114 | 0.000251 | 0.001053 |
| CEP120  | -0.36238 | 6.67E-07 | 6.13E-06 |
| CEP135  | -0.17959 | 0.016451 | 0.037686 |
| CEP152  | 0.053914 | 0.474759 | 0.584441 |
| CEP164  | -0.22102 | 0.003029 | 0.008916 |
| CEP170L | -0.11163 | 0.137958 | 0.220872 |
| CEP170  | -0.02221 | 0.76852  | 0.835094 |
| CEP192  | -0.13059 | 0.0823   | 0.14555  |
| CEP250  | -0.30005 | 4.72E-05 | 0.00025  |
| CEP290  | -0.20373 | 0.006379 | 0.016847 |
| CEP350  | -0.21947 | 0.003246 | 0.009442 |
| CEP55   | 0.389787 | 7.53E-08 | 9.12E-07 |
| CEP57   | -0.03451 | 0.647418 | 0.737232 |
| CEP63   | -0.24151 | 0.001163 | 0.003914 |
| CEP68   | -0.26385 | 0.000373 | 0.00148  |
| CEP70   | 0.149344 | 0.046631 | 0.090631 |
| CEP72   | 0.211946 | 0.00451  | 0.012533 |
| CEP76   | -0.29735 | 5.56E-05 | 0.000287 |
| CEP78   | -0.22733 | 0.002276 | 0.006979 |

|        |          |          |          |
|--------|----------|----------|----------|
| CEP97  | -0.38122 | 1.52E-07 | 1.69E-06 |
| CEPT1  | 0.097475 | 0.195528 | 0.292353 |
| CER1   | -0.19764 | 0.008183 | 0.020838 |
| CERCAM | -0.00705 | 0.925578 | 0.948555 |
| CERKL  | -0.30664 | 3.14E-05 | 0.000176 |
| CERK   | -0.40263 | 2.52E-08 | 3.52E-07 |
| CES1   | 0.120538 | 0.109002 | 0.183159 |
| CES2   | 0.221466 | 0.002969 | 0.00877  |
| CES3   | 0.205148 | 0.006014 | 0.016008 |
| CES4   | 0.011507 | 0.878839 | 0.916038 |
| CES7   | -0.21405 | 0.004118 | 0.011612 |
| CES8   | -0.25945 | 0.00047  | 0.001801 |
| CETN1  | 0.025343 | 0.737028 | 0.810026 |
| CETN2  | -0.07378 | 0.327713 | 0.439603 |
| CETN3  | -0.14175 | 0.059116 | 0.110247 |
| CETN4P | -0.16872 | 0.024367 | 0.052487 |
| CETP   | -0.21796 | 0.00347  | 0.009994 |
| CFB    | 0.324759 | 9.74E-06 | 6.35E-05 |
| CFC1B  | -0.12268 | 0.102802 | 0.17461  |
| CFDP1  | 0.305063 | 3.47E-05 | 0.000191 |
| CFD    | -0.06759 | 0.370045 | 0.483371 |
| CFHR1  | -0.03047 | 0.686381 | 0.76994  |
| CFHR2  | 0.064504 | 0.392316 | 0.504986 |
| CFHR3  | 0.10799  | 0.151338 | 0.238053 |
| CFHR4  | -0.01885 | 0.80277  | 0.860985 |
| CFHR5  | -0.02727 | 0.717839 | 0.795014 |
| CFH    | 0.144065 | 0.055042 | 0.104054 |
| CFI    | 0.248687 | 0.000816 | 0.002895 |
| CFL1   | 0.494739 | 2.23E-12 | 9.50E-11 |
| CFL2   | -0.24422 | 0.001019 | 0.00349  |
| CFLAR  | 0.28465  | 0.000118 | 0.000548 |
| CFLP1  | -0.16527 | 0.027483 | 0.058134 |
| CFP    | -0.09171 | 0.223404 | 0.325565 |
| CFTR   | 0.196749 | 0.008482 | 0.02147  |
| CG030  | 0.240395 | 0.001228 | 0.0041   |
| CGA    | -0.14078 | 0.06089  | 0.112991 |
| CGB1   | 0.398803 | 3.51E-08 | 4.66E-07 |
| CGB2   | 0.397828 | 3.82E-08 | 5.00E-07 |
| CGB5   | 0.492711 | 2.83E-12 | 1.17E-10 |
| CGB7   | 0.548433 | 2.29E-15 | 1.90E-13 |
| CGB8   | 0.467795 | 4.59E-11 | 1.43E-09 |
| COB    | 0.485627 | 6.39E-12 | 2.43E-10 |
| CGGBP1 | -0.09511 | 0.206644 | 0.305908 |
| CGNL1  | -0.27696 | 0.000182 | 0.000799 |
| CGN    | 0.454624 | 1.83E-10 | 4.80E-09 |
| CGREF1 | 0.161046 | 0.031752 | 0.065628 |
| CGRRF1 | -0.26607 | 0.000331 | 0.001334 |
| CH25H  | -0.07841 | 0.298153 | 0.408147 |
| CHAC1  | 0.058299 | 0.439532 | 0.551339 |
| CHAC2  | 0.07687  | 0.307794 | 0.418332 |
| CHADL  | 0.055197 | 0.464298 | 0.574389 |
| CHAD   | -0.11871 | 0.114526 | 0.19037  |
| CHAF1A | 0.258283 | 0.0005   | 0.001902 |
| CHAF1B | 0.004065 | 0.95705  | 0.97058  |

|           |          |          |          |
|-----------|----------|----------|----------|
| CHAT      | -0.03491 | 0.64361  | 0.733863 |
| CHCHD10   | 0.164384 | 0.028333 | 0.059653 |
| CHCHD1    | 0.223101 | 0.002759 | 0.008227 |
| CHCHD2    | 0.10055  | 0.18173  | 0.27543  |
| CHCHD3    | -0.01192 | 0.874569 | 0.913059 |
| CHCHD4    | 0.007872 | 0.916946 | 0.942259 |
| CHCHD5    | 0.205919 | 0.005823 | 0.015589 |
| CHCHD6    | 0.043752 | 0.561986 | 0.662857 |
| CHCHD7    | 0.071707 | 0.341515 | 0.453839 |
| CHCHD8    | 0.356693 | 1.02E-06 | 8.86E-06 |
| CHD1L     | -0.00512 | 0.945897 | 0.963586 |
| CHD1      | -0.09103 | 0.22688  | 0.329465 |
| CHD2      | -0.17915 | 0.016725 | 0.038198 |
| CHD3      | -0.2197  | 0.003213 | 0.009366 |
| CHD4      | -0.20669 | 0.005638 | 0.015163 |
| CHD5      | -0.28175 | 0.000139 | 0.000634 |
| CHD6      | -0.50664 | 5.38E-13 | 2.70E-11 |
| CHD7      | -0.18424 | 0.01382  | 0.032501 |
| CHD8      | -0.24941 | 0.000787 | 0.002809 |
| CHD9      | -0.14434 | 0.054576 | 0.103313 |
| CHDH      | -0.11754 | 0.118156 | 0.195026 |
| CHEK1     | 0.13626  | 0.06974  | 0.126856 |
| CHEK2     | 0.302076 | 4.17E-05 | 0.000224 |
| CHERP     | 0.014385 | 0.848855 | 0.893846 |
| CHFR      | 0.038114 | 0.613482 | 0.708875 |
| CHGA      | -0.1717  | 0.021922 | 0.047932 |
| CHGB      | -0.22855 | 0.002152 | 0.006649 |
| CHI3L1    | 0.220647 | 0.00308  | 0.009031 |
| CHI3L2    | -0.08152 | 0.279375 | 0.387743 |
| CHIA      | -0.04239 | 0.574256 | 0.673908 |
| CHIC1     | -0.35521 | 1.14E-06 | 9.74E-06 |
| CHIC2     | 0.136308 | 0.069641 | 0.126686 |
| CHID1     | -0.21551 | 0.003865 | 0.010987 |
| CHIT1     | 0.149249 | 0.046773 | 0.090845 |
| CHKA      | 0.172461 | 0.021336 | 0.046867 |
| CHKB-CPT1 | 0.107005 | 0.155126 | 0.242967 |
| CHKB      | 0.26634  | 0.000326 | 0.001318 |
| CHL1      | -0.20834 | 0.00526  | 0.014298 |
| CHML      | 0.233745 | 0.001688 | 0.005395 |
| CHMP1A    | 0.471061 | 3.22E-11 | 1.03E-09 |
| CHMP1B    | 0.142714 | 0.057386 | 0.10762  |
| CHMP2A    | 0.379118 | 1.80E-07 | 1.96E-06 |
| CHMP2B    | 0.407158 | 1.70E-08 | 2.48E-07 |
| CHMP4A    | 0.265078 | 0.000349 | 0.001399 |
| CHMP4B    | 0.468386 | 4.31E-11 | 1.35E-09 |
| CHMP4C    | 0.400075 | 3.15E-08 | 4.24E-07 |
| CHMP5     | 0.175833 | 0.01889  | 0.042331 |
| CHMP6     | 0.109309 | 0.146378 | 0.231762 |
| CHMP7     | 0.076945 | 0.307324 | 0.417808 |
| CHM       | -0.33749 | 4.09E-06 | 2.98E-05 |
| CHN1      | -0.15638 | 0.03711  | 0.074841 |
| CHN2      | -0.16378 | 0.028929 | 0.060727 |
| CHODL     | -0.11844 | 0.115346 | 0.191443 |
| CHORDC1   | -0.0631  | 0.402749 | 0.5154   |

|          |          |          |          |
|----------|----------|----------|----------|
| CHP2     | 0.055704 | 0.460195 | 0.570598 |
| CHPF2    | -0.06816 | 0.366013 | 0.479402 |
| CHPF     | 0.2136   | 0.004199 | 0.011799 |
| CHPT1    | 0.235607 | 0.001546 | 0.005001 |
| CHP      | 0.46029  | 1.02E-10 | 2.85E-09 |
| CHRAC1   | 0.254891 | 0.000596 | 0.002205 |
| CHRD1    | -0.19749 | 0.008232 | 0.020925 |
| CHRD2    | -0.13902 | 0.064211 | 0.11819  |
| CHRD     | 0.043911 | 0.560567 | 0.661533 |
| CHRFAM7A | 0.027311 | 0.717445 | 0.794777 |
| CHRM1    | -0.13221 | 0.078533 | 0.140015 |
| CHRM2    | -0.097   | 0.197739 | 0.295056 |
| CHRM3    | -0.32359 | 1.05E-05 | 6.81E-05 |
| CHRM4    | -0.33242 | 5.80E-06 | 4.06E-05 |
| CHRM5    | -0.16796 | 0.025026 | 0.053696 |
| CHRNA10  | -0.03178 | 0.673703 | 0.760074 |
| CHRNA1   | 0.20022  | 0.00737  | 0.019041 |
| CHRNA2   | -0.19501 | 0.009095 | 0.022739 |
| CHRNA3   | -0.08854 | 0.239906 | 0.344235 |
| CHRNA4   | -0.18465 | 0.013607 | 0.032115 |
| CHRNA5   | 0.279403 | 0.000159 | 0.000711 |
| CHRNA6   | -0.01049 | 0.889443 | 0.92315  |
| CHRNA7   | -0.08538 | 0.257132 | 0.363484 |
| CHRNA9   | -0.15197 | 0.042861 | 0.084491 |
| CHRN1    | -0.06598 | 0.381523 | 0.494251 |
| CHRN2    | -0.36254 | 6.59E-07 | 6.07E-06 |
| CHRN3    | -0.17018 | 0.023139 | 0.05022  |
| CHRN4    | 0.069737 | 0.35498  | 0.467927 |
| CHRN     | -0.08127 | 0.280843 | 0.389247 |
| CHRE     | -0.11519 | 0.125736 | 0.204989 |
| CHRN     | 0.220355 | 0.003121 | 0.009135 |
| CHST10   | -0.19272 | 0.009958 | 0.024618 |
| CHST11   | 0.244797 | 0.00099  | 0.003409 |
| CHST12   | -0.09714 | 0.197087 | 0.294262 |
| CHST13   | 0.066629 | 0.376877 | 0.489578 |
| CHST14   | 0.054552 | 0.469544 | 0.579596 |
| CHST15   | 0.122019 | 0.10469  | 0.177298 |
| CHST1    | 0.057509 | 0.445766 | 0.557174 |
| CHST2    | -0.12648 | 0.092504 | 0.159963 |
| CHST3    | 0.106561 | 0.156856 | 0.245113 |
| CHST4    | 0.365781 | 5.14E-07 | 4.88E-06 |
| CHST5    | -0.07409 | 0.325696 | 0.43776  |
| CHST6    | 0.299699 | 4.82E-05 | 0.000255 |
| CHST7    | -0.26235 | 0.000404 | 0.001582 |
| CHST8    | -0.15875 | 0.034301 | 0.070105 |
| CHST9    | -0.14103 | 0.060423 | 0.11222  |
| CHSY1    | -0.0437  | 0.562423 | 0.663209 |
| CHSY3    | 0.113824 | 0.130325 | 0.210923 |
| CHTF18   | 0.219208 | 0.003284 | 0.009531 |
| CHTF8    | -0.01814 | 0.810068 | 0.865572 |
| CHUK     | -0.27544 | 0.000198 | 0.00086  |
| CHURC1   | -0.09335 | 0.215182 | 0.316099 |
| CIAO1    | -0.05172 | 0.492987 | 0.601386 |
| CIAPIN1  | 0.188773 | 0.011618 | 0.028072 |

|        |          |          |          |
|--------|----------|----------|----------|
| CIB1   | 0.456744 | 1.47E-10 | 3.95E-09 |
| CIB2   | -0.0481  | 0.523729 | 0.629213 |
| CIB3   | 0.098041 | 0.192934 | 0.289153 |
| CIB4   | -0.30903 | 2.70E-05 | 0.000154 |
| CIC    | -0.07016 | 0.35205  | 0.46484  |
| CIDEA  | -0.208   | 0.005335 | 0.014472 |
| CIDEB  | -0.1022  | 0.174641 | 0.266977 |
| CIDECF | 0.181935 | 0.015077 | 0.035008 |
| CIDEC  | 0.336113 | 4.50E-06 | 3.25E-05 |
| CIITA  | 0.16511  | 0.027633 | 0.05839  |
| CILP2  | 0.131599 | 0.079946 | 0.142114 |
| CILP   | 0.000246 | 0.997401 | 0.997876 |
| CINP   | 0.092919 | 0.217339 | 0.318652 |
| CIR1   | 0.112302 | 0.135579 | 0.217909 |
| CIRBP  | -0.23983 | 0.001262 | 0.0042   |
| CIRH1A | 0.213319 | 0.00425  | 0.011915 |
| CISD1  | -0.23163 | 0.001865 | 0.005874 |
| CISD2  | -0.0931  | 0.216464 | 0.3177   |
| CISD3  | 0.217566 | 0.003531 | 0.010148 |
| CISH   | -0.25472 | 0.000601 | 0.00222  |
| CITED1 | -0.11027 | 0.142847 | 0.227172 |
| CITED2 | -0.46724 | 4.87E-11 | 1.49E-09 |
| CITED4 | 0.294399 | 6.64E-05 | 0.000334 |
| CIT    | 0.083599 | 0.267242 | 0.374864 |
| CIZ1   | -0.14638 | 0.051214 | 0.097959 |
| CKAP2L | 0.28379  | 0.000124 | 0.000572 |
| CKAP2  | -0.05217 | 0.489226 | 0.597822 |
| CKAP4  | -0.16707 | 0.025817 | 0.055119 |
| CKAP5  | -0.08294 | 0.271063 | 0.378906 |
| CKB    | -0.05688 | 0.45074  | 0.561622 |
| CKLF   | 0.59483  | 2.05E-18 | 4.13E-16 |
| CKMT1A | 0.320503 | 1.29E-05 | 8.11E-05 |
| CKMT1B | 0.320123 | 1.32E-05 | 8.28E-05 |
| CKMT2  | 0.226233 | 0.002393 | 0.007276 |
| CKM    | 0.11634  | 0.121987 | 0.199832 |
| CKS1B  | 0.402671 | 2.52E-08 | 3.51E-07 |
| CKS2   | 0.345628 | 2.30E-06 | 1.80E-05 |
| CLASP1 | -0.23912 | 0.001306 | 0.004321 |
| CLASP2 | -0.41409 | 9.15E-09 | 1.46E-07 |
| CLCA1  | -0.08945 | 0.235074 | 0.339048 |
| CLCA2  | 0.011489 | 0.87902  | 0.916068 |
| CLCA3P | 0.12721  | 0.090624 | 0.157248 |
| CLCA4  | 0.223311 | 0.002733 | 0.008156 |
| CLCC1  | -0.21114 | 0.004668 | 0.012913 |
| CLCF1  | 0.514774 | 1.97E-13 | 1.09E-11 |
| CLCN1  | 0.558742 | 5.29E-16 | 5.18E-14 |
| CLCN2  | 0.075117 | 0.318992 | 0.43071  |
| CLCN3  | -0.15705 | 0.036295 | 0.07349  |
| CLCN4  | -0.39856 | 3.59E-08 | 4.74E-07 |
| CLCN5  | -0.42545 | 3.22E-09 | 5.90E-08 |
| CLCN6  | -0.16002 | 0.032866 | 0.067613 |
| CLCN7  | -0.02008 | 0.790211 | 0.851626 |
| CLCNKA | -0.13191 | 0.079221 | 0.140988 |
| CLCNKB | -0.02358 | 0.754739 | 0.824405 |

|          |          |          |          |
|----------|----------|----------|----------|
| CLC      | -0.13681 | 0.068613 | 0.125127 |
| CLDN10   | 0.308138 | 2.86E-05 | 0.000162 |
| CLDN11   | 0.150217 | 0.045349 | 0.088636 |
| CLDN12   | 0.061807 | 0.412451 | 0.524486 |
| CLDN14   | 0.231724 | 0.001857 | 0.005854 |
| CLDN15   | 0.042065 | 0.577179 | 0.676334 |
| CLDN16   | 0.08401  | 0.264887 | 0.37225  |
| CLDN18   | 0.377386 | 2.07E-07 | 2.21E-06 |
| CLDN19   | -0.12643 | 0.092625 | 0.160115 |
| CLDN1    | 0.385897 | 1.04E-07 | 1.20E-06 |
| CLDN20   | -0.02832 | 0.707439 | 0.786988 |
| CLDN22   | 0.177657 | 0.017671 | 0.039998 |
| CLDN23   | 0.513407 | 2.33E-13 | 1.27E-11 |
| CLDN25   | 0.085056 | 0.258963 | 0.365324 |
| CLDN2    | 0.24645  | 0.000913 | 0.003175 |
| CLDN3    | -0.17258 | 0.021243 | 0.046688 |
| CLDN4    | 0.464521 | 6.51E-11 | 1.94E-09 |
| CLDN5    | -0.02784 | 0.712224 | 0.790676 |
| CLDN6    | 0.040823 | 0.588481 | 0.686556 |
| CLDN7    | 0.301157 | 4.41E-05 | 0.000236 |
| CLDN8    | -0.05165 | 0.493494 | 0.601802 |
| CLDN9    | 0.123966 | 0.099225 | 0.169452 |
| CLDND1   | 0.067732 | 0.369014 | 0.482368 |
| CLDND2   | -0.04417 | 0.558274 | 0.659263 |
| CLEC10A  | -0.08378 | 0.266229 | 0.373657 |
| CLEC11A  | 0.193888 | 0.009508 | 0.023647 |
| CLEC12A  | 0.048663 | 0.518896 | 0.624612 |
| CLEC12B  | -0.01252 | 0.868293 | 0.909119 |
| CLEC14A  | -0.16995 | 0.023328 | 0.050607 |
| CLEC16A  | 0.06498  | 0.388831 | 0.501353 |
| CLEC17A  | -0.08805 | 0.242499 | 0.34705  |
| CLEC18A  | 0.041863 | 0.579007 | 0.677954 |
| CLEC18B  | -0.01801 | 0.811414 | 0.866589 |
| CLEC18C  | -0.00645 | 0.931882 | 0.953089 |
| CLEC1A   | -0.20624 | 0.005746 | 0.015414 |
| CLEC1B   | 0.085623 | 0.255792 | 0.362245 |
| CLEC2A   | -0.11949 | 0.112132 | 0.187366 |
| CLEC2B   | 0.110847 | 0.140748 | 0.224486 |
| CLEC2D   | 0.026543 | 0.725065 | 0.800795 |
| CLEC2L   | -0.02538 | 0.736639 | 0.809643 |
| CLEC3A   | -0.13476 | 0.072905 | 0.131559 |
| CLEC3B   | -0.2071  | 0.005542 | 0.014936 |
| CLEC4A   | 0.019645 | 0.794647 | 0.85487  |
| CLEC4C   | -0.17896 | 0.01684  | 0.0384   |
| CLEC4D   | -0.18845 | 0.011766 | 0.028361 |
| CLEC4E   | -0.12254 | 0.103197 | 0.175175 |
| CLEC4F   | -0.10207 | 0.175171 | 0.267539 |
| CLEC4GP1 | -0.02614 | 0.729102 | 0.803861 |
| CLEC4G   | -0.13707 | 0.06808  | 0.124282 |
| CLEC4M   | -0.02344 | 0.756112 | 0.825358 |
| CLEC5A   | 0.234036 | 0.001665 | 0.005334 |
| CLEC6A   | -0.12964 | 0.084576 | 0.148778 |
| CLEC7A   | 0.051785 | 0.492401 | 0.600959 |
| CLEC9A   | -0.19735 | 0.008281 | 0.021028 |



|         |          |          |          |
|---------|----------|----------|----------|
| CLECL1  | 0.043411 | 0.565047 | 0.665628 |
| CLGN    | -0.34076 | 3.25E-06 | 2.44E-05 |
| CLIC1   | 0.587624 | 6.56E-18 | 1.13E-15 |
| CLIC2   | -0.09252 | 0.219315 | 0.320907 |
| CLIC3   | 0.711509 | 8.97E-29 | 3.55E-25 |
| CLIC4   | 0.018071 | 0.810781 | 0.866086 |
| CLIC5   | 0.069769 | 0.354756 | 0.467694 |
| CLIC6   | 0.256542 | 0.000547 | 0.002054 |
| CLINT1  | 0.255597 | 0.000574 | 0.00214  |
| CLIP1   | -0.19056 | 0.010838 | 0.026465 |
| CLIP2   | 0.020054 | 0.790476 | 0.851818 |
| CLIP3   | -0.27208 | 0.000239 | 0.001008 |
| CLIP4   | 0.08347  | 0.267982 | 0.375581 |
| CLK1    | 0.077285 | 0.305181 | 0.415493 |
| CLK2P   | 0.184153 | 0.013867 | 0.032594 |
| CLK2    | 0.291839 | 7.73E-05 | 0.00038  |
| CLK3    | 0.066804 | 0.375621 | 0.488654 |
| CLK4    | -0.10926 | 0.146548 | 0.231902 |
| CLUU10S | 0.164064 | 0.028647 | 0.060211 |
| CLUU1   | 0.002685 | 0.971625 | 0.980901 |
| CLMN    | 0.165224 | 0.027524 | 0.058204 |
| CLN3    | 0.214722 | 0.003999 | 0.011323 |
| CLN5    | 0.001949 | 0.979406 | 0.985789 |
| CLN6    | 0.281536 | 0.000141 | 0.00064  |
| CLN8    | -0.17234 | 0.02143  | 0.047026 |
| CLNK    | -0.19772 | 0.008158 | 0.020792 |
| CLNS1A  | 0.250053 | 0.000762 | 0.002727 |
| CLOCK   | -0.13843 | 0.065366 | 0.12007  |
| CLP1    | 0.075477 | 0.316669 | 0.428053 |
| CLPB    | -0.11744 | 0.118464 | 0.195404 |
| CLPP    | 0.130284 | 0.083033 | 0.146598 |
| CLPS    | -0.06695 | 0.374566 | 0.487537 |
| CLPTM1L | -0.18945 | 0.011318 | 0.027457 |
| CLPTM1  | -0.02719 | 0.718607 | 0.795395 |
| CLPX    | -0.07923 | 0.293152 | 0.402891 |
| CLRN10S | 0.058967 | 0.434299 | 0.545848 |
| CLRN1   | 0.019178 | 0.799433 | 0.85885  |
| CLRN2   | -0.2368  | 0.00146  | 0.004757 |
| CLRN3   | 0.156421 | 0.037063 | 0.074776 |
| CLSPN   | 0.135349 | 0.071648 | 0.129775 |
| CLSTN1  | 0.139073 | 0.064113 | 0.118061 |
| CLSTN2  | -0.27606 | 0.000192 | 0.000834 |
| CLSTN3  | -0.35205 | 1.44E-06 | 1.19E-05 |
| CLTA    | 0.116281 | 0.122176 | 0.200075 |
| CLTB    | 0.587048 | 7.19E-18 | 1.20E-15 |
| CLTCL1  | -0.13993 | 0.062475 | 0.11558  |
| CLTC    | -0.17334 | 0.020674 | 0.045657 |
| CLUAP1  | -0.20862 | 0.005198 | 0.014149 |
| CLUL1   | -0.34272 | 2.83E-06 | 2.16E-05 |
| CLU     | -0.14739 | 0.049613 | 0.095414 |
| CLVS1   | 0.017976 | 0.811753 | 0.866799 |
| CLVS2   | -0.15826 | 0.034864 | 0.071022 |
| CLYBL   | 0.195019 | 0.00909  | 0.02273  |
| CMA1    | -0.25807 | 0.000505 | 0.001918 |

|         |          |          |          |
|---------|----------|----------|----------|
| CMAH    | -0.15923 | 0.033753 | 0.069165 |
| CMAS    | -0.06494 | 0.389132 | 0.501629 |
| CMBL    | 0.134985 | 0.072421 | 0.130877 |
| CMC1    | 0.247081 | 0.000884 | 0.003095 |
| CMIP    | -0.27877 | 0.000165 | 0.000732 |
| CMKLR1  | -0.11842 | 0.115411 | 0.191519 |
| CMPK1   | 0.242868 | 0.001089 | 0.003695 |
| CMPK2   | 0.253313 | 0.000646 | 0.002358 |
| CMTM1   | 0.32707  | 8.35E-06 | 5.54E-05 |
| CMTM2   | 0.232416 | 0.001797 | 0.00569  |
| CMTM3   | 0.348653 | 1.85E-06 | 1.48E-05 |
| CMTM4   | -0.29376 | 6.90E-05 | 0.000345 |
| CMTM5   | -0.13227 | 0.078404 | 0.139848 |
| CMTM6   | 0.185561 | 0.013145 | 0.031184 |
| CMTM7   | 0.479847 | 1.23E-11 | 4.27E-10 |
| CMTM8   | -0.27105 | 0.000253 | 0.001057 |
| CMYA5   | -0.00886 | 0.906591 | 0.934776 |
| CN5H6.4 | -0.29902 | 5.03E-05 | 0.000264 |
| CNBD1   | -0.037   | 0.623878 | 0.717659 |
| CNBP    | 0.10013  | 0.183575 | 0.277566 |
| CNDP1   | -0.00805 | 0.915088 | 0.94078  |
| CNDP2   | 0.058432 | 0.438488 | 0.550204 |
| CNFN    | 0.187688 | 0.012115 | 0.029106 |
| CNGA1   | 0.148163 | 0.048413 | 0.093443 |
| CNGA2   | -0.14467 | 0.054014 | 0.102433 |
| CNGA3   | -0.28856 | 9.38E-05 | 0.000449 |
| CNGA4   | 0.043671 | 0.562716 | 0.663475 |
| CNGB1   | 0.122073 | 0.104535 | 0.177082 |
| CNGB3   | -0.10867 | 0.148772 | 0.234744 |
| CNIH2   | -0.20576 | 0.005863 | 0.01567  |
| CNIH3   | 0.031406 | 0.677298 | 0.762824 |
| CNIH4   | 0.454399 | 1.88E-10 | 4.90E-09 |
| CNIH    | 0.040823 | 0.588482 | 0.686556 |
| CNKS1   | 0.456897 | 1.45E-10 | 3.90E-09 |
| CNKS2   | -0.31015 | 2.52E-05 | 0.000144 |
| CNKS3   | -0.41824 | 6.28E-09 | 1.06E-07 |
| CNN1    | 0.090998 | 0.227038 | 0.329622 |
| CNN2    | 0.496227 | 1.87E-12 | 8.19E-11 |
| CNN3    | -0.14372 | 0.055634 | 0.104962 |
| CNNM1   | 0.218139 | 0.003443 | 0.00993  |
| CNNM2   | -0.16782 | 0.025146 | 0.053884 |
| CNNM3   | -0.36187 | 6.93E-07 | 6.34E-06 |
| CNNM4   | 0.4389   | 8.89E-10 | 1.91E-08 |
| CNOT10  | 0.087003 | 0.248183 | 0.353496 |
| CNOT1   | -0.04719 | 0.531676 | 0.635863 |
| CNOT2   | -0.03128 | 0.678559 | 0.763722 |
| CNOT3   | -0.01211 | 0.872566 | 0.911855 |
| CNOT4   | -0.35085 | 1.57E-06 | 1.29E-05 |
| CNOT6L  | -0.51917 | 1.13E-13 | 6.61E-12 |
| CNOT6   | 0.034961 | 0.643157 | 0.73379  |
| CNOT7   | -0.26155 | 0.000421 | 0.00164  |
| CNOT8   | 0.105618 | 0.160579 | 0.249567 |
| CNO     | 0.296861 | 5.73E-05 | 0.000294 |
| CNPY1   | 0.059023 | 0.43386  | 0.545366 |

|         |          |          |          |
|---------|----------|----------|----------|
| CNPY2   | -0.23158 | 0.001869 | 0.005886 |
| CNPY3   | -0.0352  | 0.640897 | 0.731957 |
| CNPY4   | -0.02812 | 0.709457 | 0.788312 |
| CNP     | -0.08736 | 0.246263 | 0.351246 |
| CNR1    | -0.12314 | 0.101506 | 0.172765 |
| CNR2    | -0.10277 | 0.172244 | 0.264068 |
| CNRIP1  | -0.13925 | 0.063761 | 0.117559 |
| CNST    | -0.43914 | 8.68E-10 | 1.88E-08 |
| CNTD1   | -0.01728 | 0.818912 | 0.871707 |
| CNTD2   | -0.09283 | 0.217786 | 0.319213 |
| CNTFR   | -0.23433 | 0.001643 | 0.005275 |
| CNTF    | -0.08122 | 0.281135 | 0.38957  |
| CNTLN   | -0.19558 | 0.008888 | 0.022295 |
| CNTN1   | -0.16695 | 0.025921 | 0.055316 |
| CNTN2   | -0.13267 | 0.07751  | 0.138479 |
| CNTN3   | 0.032546 | 0.666266 | 0.753664 |
| CNTN4   | -0.10476 | 0.164021 | 0.253922 |
| CNTN5   | -0.32789 | 7.90E-06 | 5.28E-05 |
| CNTN6   | -0.11916 | 0.113142 | 0.188577 |
| CNTNAP1 | -0.06825 | 0.365343 | 0.478682 |
| CNTNAP2 | 0.041633 | 0.581104 | 0.679968 |
| CNTNAP3 | -0.00991 | 0.895528 | 0.927081 |
| CNTNAP4 | -0.34984 | 1.70E-06 | 1.37E-05 |
| CNTNAP5 | -0.31393 | 1.98E-05 | 0.000117 |
| CNTROB  | -0.16339 | 0.029312 | 0.061413 |
| COASY   | 0.210287 | 0.004842 | 0.013336 |
| COBLL1  | -0.03278 | 0.664    | 0.752087 |
| COBL    | -0.08745 | 0.245759 | 0.350623 |
| COBRA1  | 0.12228  | 0.103943 | 0.176245 |
| COCH    | -0.1972  | 0.008329 | 0.021137 |
| COG1    | -0.35332 | 1.31E-06 | 1.10E-05 |
| COG2    | 0.023142 | 0.759132 | 0.828015 |
| COG3    | -0.1172  | 0.119239 | 0.19647  |
| COG4    | 0.333384 | 5.43E-06 | 3.83E-05 |
| COG5    | -0.19691 | 0.008427 | 0.02135  |
| COG6    | -0.24226 | 0.001122 | 0.003791 |
| COG7    | 0.101623 | 0.17709  | 0.269679 |
| COG8    | -0.09421 | 0.21101  | 0.311301 |
| COIL    | -0.11473 | 0.127275 | 0.206934 |
| COL10A1 | 0.371138 | 3.40E-07 | 3.40E-06 |
| COL11A1 | 0.355945 | 1.08E-06 | 9.31E-06 |
| COL11A2 | 0.112111 | 0.136249 | 0.218705 |
| COL12A1 | 0.192631 | 0.009992 | 0.02468  |
| COL13A1 | 0.124369 | 0.098122 | 0.167953 |
| COL14A1 | -0.16581 | 0.026971 | 0.057205 |
| COL15A1 | -0.04941 | 0.51246  | 0.618606 |
| COL16A1 | 0.122325 | 0.103814 | 0.176056 |
| COL17A1 | 0.689423 | 1.95E-26 | 3.21E-23 |
| COL18A1 | 0.199745 | 0.007514 | 0.019368 |
| COL19A1 | -0.23336 | 0.00172  | 0.005481 |
| COL1A1  | 0.248174 | 0.000837 | 0.002951 |
| COL1A2  | 0.21971  | 0.003211 | 0.009362 |
| COL20A1 | -0.02724 | 0.718125 | 0.795092 |
| COL21A1 | -0.20112 | 0.007104 | 0.018445 |

|          |          |          |          |
|----------|----------|----------|----------|
| COL22A1  | 0.197658 | 0.008177 | 0.02083  |
| COL23A1  | 0.052995 | 0.482331 | 0.591599 |
| COL24A1  | -0.07946 | 0.291704 | 0.401312 |
| COL25A1  | -0.36767 | 4.45E-07 | 4.29E-06 |
| COL27A1  | -0.02257 | 0.764937 | 0.832463 |
| COL28A1  | -0.11424 | 0.128924 | 0.2091   |
| COL29A1  | -0.01189 | 0.874838 | 0.913168 |
| COL2A1   | -0.27211 | 0.000238 | 0.001007 |
| COL3A1   | 0.163615 | 0.029092 | 0.06103  |
| COL4A1   | 0.064991 | 0.388751 | 0.501347 |
| COL4A2   | 0.134235 | 0.074035 | 0.13327  |
| COL4A3BP | -0.20518 | 0.006006 | 0.015992 |
| COL4A3   | 0.010004 | 0.894559 | 0.926369 |
| COL4A4   | -0.00859 | 0.909439 | 0.936628 |
| COL4A5   | 0.154713 | 0.039206 | 0.078373 |
| COL4A6   | -0.08899 | 0.237498 | 0.341421 |
| COL5A1   | 0.244427 | 0.001009 | 0.003458 |
| COL5A2   | 0.169134 | 0.024013 | 0.051838 |
| COL5A3   | 0.106662 | 0.156462 | 0.244614 |
| COL6A1   | 0.162321 | 0.030407 | 0.063405 |
| COL6A2   | 0.148216 | 0.048332 | 0.093305 |
| COL6A3   | 0.139743 | 0.062828 | 0.116064 |
| COL6A4P2 | 0.328676 | 7.49E-06 | 5.05E-05 |
| COL6A6   | -0.17979 | 0.01633  | 0.037462 |
| COL7A1   | 0.413871 | 9.33E-09 | 1.49E-07 |
| COL8A1   | 0.148329 | 0.048159 | 0.093054 |
| COL8A2   | 0.339309 | 3.60E-06 | 2.66E-05 |
| COL9A1   | 0.114617 | 0.127651 | 0.207392 |
| COL9A2   | 0.215593 | 0.00385  | 0.010953 |
| COL9A3   | 0.009838 | 0.896299 | 0.927782 |
| COLEC10  | 0.003246 | 0.965702 | 0.976806 |
| COLEC11  | -0.04331 | 0.565916 | 0.666436 |
| COLEC12  | 0.09184  | 0.222752 | 0.324782 |
| COLQ     | -0.07447 | 0.323159 | 0.435148 |
| COMMD10  | -0.31839 | 1.48E-05 | 9.15E-05 |
| COMMD1   | 0.205421 | 0.005946 | 0.015854 |
| COMMD2   | 0.154295 | 0.039746 | 0.07929  |
| COMMD3   | 0.159079 | 0.033925 | 0.069445 |
| COMMD4   | 0.255363 | 0.000581 | 0.002161 |
| COMMD5   | 0.294765 | 6.50E-05 | 0.000327 |
| COMMD6   | 0.245002 | 0.00098  | 0.003377 |
| COMMD7   | 0.241475 | 0.001166 | 0.003919 |
| COMMD8   | -0.2433  | 0.001066 | 0.003627 |
| COMMD9   | -0.07718 | 0.305848 | 0.416136 |
| COMP     | 0.361578 | 7.09E-07 | 6.47E-06 |
| COMTD1   | 0.093643 | 0.213764 | 0.314459 |
| COMT     | 0.315621 | 1.78E-05 | 0.000107 |
| COPA     | -0.1146  | 0.127697 | 0.207433 |
| COPB1    | -0.06888 | 0.360954 | 0.474095 |
| COPB2    | -0.1307  | 0.082044 | 0.145223 |
| COPE     | 0.031454 | 0.676828 | 0.762541 |
| COPG2    | 0.017758 | 0.813994 | 0.868278 |
| COPG     | 0.06565  | 0.383946 | 0.496836 |
| COPS2    | -0.06097 | 0.418837 | 0.531141 |

|         |          |          |          |
|---------|----------|----------|----------|
| COP3    | -0.47915 | 1.32E-11 | 4.55E-10 |
| COP4    | -0.40436 | 2.17E-08 | 3.08E-07 |
| COP5    | 0.171839 | 0.021816 | 0.047731 |
| COP6    | 0.112284 | 0.135639 | 0.217988 |
| COP7A   | -0.06456 | 0.391878 | 0.50459  |
| COP7B   | 0.327805 | 7.94E-06 | 5.30E-05 |
| COP8    | 0.076486 | 0.310223 | 0.420763 |
| COPZ1   | -0.09343 | 0.214787 | 0.31566  |
| COPZ2   | 0.18153  | 0.015307 | 0.035439 |
| COQ10A  | -0.43507 | 1.29E-09 | 2.62E-08 |
| COQ10B  | 0.213932 | 0.004139 | 0.011655 |
| COQ2    | -0.02473 | 0.743204 | 0.815047 |
| COQ3    | -0.18532 | 0.013265 | 0.031418 |
| COQ4    | -0.04462 | 0.554229 | 0.655933 |
| COQ5    | -0.07685 | 0.307945 | 0.418394 |
| COQ6    | -0.05795 | 0.442278 | 0.554045 |
| COQ7    | -0.25852 | 0.000494 | 0.001881 |
| COQ9    | 0.135763 | 0.070774 | 0.128418 |
| CORIN   | 0.224095 | 0.002638 | 0.007909 |
| COR01A  | 0.019994 | 0.791091 | 0.852156 |
| COR01B  | 0.428393 | 2.44E-09 | 4.61E-08 |
| COR01C  | 0.216723 | 0.003664 | 0.010489 |
| COR02A  | 0.546052 | 3.19E-15 | 2.58E-13 |
| COR02B  | -0.28337 | 0.000127 | 0.000584 |
| COR06   | 0.167926 | 0.025054 | 0.053739 |
| COR07   | -0.01224 | 0.871184 | 0.911085 |
| CORT    | -0.22398 | 0.002652 | 0.007946 |
| COTL1   | 0.454249 | 1.91E-10 | 4.97E-09 |
| COX10   | -0.38662 | 9.79E-08 | 1.14E-06 |
| COX11   | -0.0874  | 0.246024 | 0.350976 |
| COX15   | 0.027435 | 0.716221 | 0.793554 |
| COX16   | 0.067144 | 0.373191 | 0.486356 |
| COX17   | 0.078901 | 0.295152 | 0.404992 |
| COX18   | -0.21592 | 0.003796 | 0.010817 |
| COX19   | -0.05373 | 0.476231 | 0.585815 |
| COX4I1  | 0.213716 | 0.004178 | 0.011753 |
| COX4I2  | -0.01874 | 0.80388  | 0.861571 |
| COX4NB  | 0.297319 | 5.57E-05 | 0.000287 |
| COX5A   | 0.205159 | 0.006011 | 0.016004 |
| COX5B   | 0.212793 | 0.004348 | 0.012139 |
| COX6A1  | 0.084775 | 0.260548 | 0.367167 |
| COX6A2  | -0.24195 | 0.001139 | 0.003845 |
| COX6B1  | 0.309472 | 2.63E-05 | 0.00015  |
| COX6B2  | 0.601065 | 7.29E-19 | 1.60E-16 |
| COX6C   | 0.124378 | 0.098097 | 0.167946 |
| COX7A1  | 0.090852 | 0.227787 | 0.330564 |
| COX7A2L | -0.05808 | 0.441246 | 0.553068 |
| COX7A2  | -0.01891 | 0.802135 | 0.86063  |
| COX7B2  | 0.014989 | 0.84259  | 0.888844 |
| COX7B   | 0.229614 | 0.002048 | 0.006361 |
| COX7C   | 0.100343 | 0.182637 | 0.276508 |
| COX8A   | 0.107718 | 0.152378 | 0.239326 |
| COX8C   | -0.2026  | 0.006684 | 0.017546 |
| CP110   | -0.18024 | 0.016063 | 0.036934 |

|        |          |          |          |
|--------|----------|----------|----------|
| CPA1   | -0.05302 | 0.482166 | 0.591571 |
| CPA2   | -0.08065 | 0.284551 | 0.393476 |
| CPA3   | -0.04137 | 0.583488 | 0.682169 |
| CPA4   | 0.070466 | 0.349959 | 0.46248  |
| CPA5   | -0.2325  | 0.00179  | 0.00567  |
| CPA6   | 0.220434 | 0.00311  | 0.009107 |
| CPAMD8 | 0.02187  | 0.772001 | 0.83757  |
| CPB1   | -0.03436 | 0.648921 | 0.738221 |
| CPB2   | -0.14719 | 0.049919 | 0.095853 |
| CPD    | -0.10442 | 0.165423 | 0.255612 |
| CPEB1  | -0.34365 | 2.65E-06 | 2.03E-05 |
| CPEB2  | -0.11023 | 0.142988 | 0.227324 |
| CPEB3  | -0.35439 | 1.21E-06 | 1.03E-05 |
| CPEB4  | -0.42432 | 3.58E-09 | 6.50E-08 |
| CPE    | -0.45256 | 2.27E-10 | 5.75E-09 |
| CPLX1  | -0.14326 | 0.056424 | 0.106158 |
| CPLX2  | -0.20048 | 0.007294 | 0.018871 |
| CPLX3  | -0.11117 | 0.139582 | 0.222998 |
| CPLX4  | -0.07759 | 0.303256 | 0.413615 |
| CPM    | -0.08544 | 0.256824 | 0.363212 |
| CPN1   | -0.1909  | 0.010695 | 0.026165 |
| CPN2   | 0.021825 | 0.772455 | 0.837925 |
| CPNE1  | 0.164234 | 0.02848  | 0.059898 |
| CPNE2  | 0.023149 | 0.759066 | 0.827988 |
| CPNE3  | -0.18052 | 0.015895 | 0.036603 |
| CPNE4  | -0.2202  | 0.003142 | 0.009185 |
| CPNE5  | 0.104809 | 0.163827 | 0.253642 |
| CPNE6  | -0.00465 | 0.950916 | 0.966906 |
| CPNE7  | 0.302357 | 4.10E-05 | 0.000221 |
| CPNE8  | 0.17539  | 0.019197 | 0.042897 |
| CPNE9  | -0.05955 | 0.42979  | 0.541627 |
| CPOX   | 0.326426 | 8.72E-06 | 5.75E-05 |
| CPO    | -0.13743 | 0.067355 | 0.123163 |
| CPPED1 | -0.02799 | 0.71077  | 0.789465 |
| CPS1   | 0.066019 | 0.381275 | 0.493994 |
| CPSF1  | 0.072282 | 0.337649 | 0.449971 |
| CPSF2  | -0.10415 | 0.166518 | 0.257023 |
| CPSF3L | 0.181309 | 0.015434 | 0.035695 |
| CPSF3  | 0.260487 | 0.000445 | 0.001722 |
| CPSF4L | -0.20632 | 0.005726 | 0.015366 |
| CPSF4  | 0.019893 | 0.792122 | 0.852845 |
| CPSF6  | -0.08911 | 0.236866 | 0.340786 |
| CPSF7  | -0.12533 | 0.095544 | 0.164286 |
| CPT1A  | 0.037452 | 0.619666 | 0.713911 |
| CPT1B  | 0.166733 | 0.026121 | 0.055695 |
| CPT1C  | -0.2367  | 0.001468 | 0.004777 |
| CPT2   | -0.19937 | 0.00763  | 0.019618 |
| CPVL   | -0.09715 | 0.19703  | 0.294199 |
| CPXCR1 | -0.13021 | 0.083204 | 0.146815 |
| CPXM1  | 0.089513 | 0.234747 | 0.338749 |
| CPXM2  | 0.129603 | 0.084669 | 0.148908 |
| CPZ    | 0.285255 | 0.000114 | 0.000532 |
| CP     | 0.217627 | 0.003522 | 0.010125 |
| CR1L   | -0.2581  | 0.000504 | 0.001916 |

|          |          |          |          |
|----------|----------|----------|----------|
| CR1      | -0.04184 | 0.579179 | 0.678075 |
| CR2      | -0.05924 | 0.432196 | 0.544042 |
| CRABP1   | -0.00226 | 0.976084 | 0.983589 |
| CRABP2   | 0.510328 | 3.42E-13 | 1.79E-11 |
| CRADD    | -0.44784 | 3.66E-10 | 8.83E-09 |
| CRAMP1L  | -0.2181  | 0.003449 | 0.009941 |
| CRAT     | -0.20835 | 0.005257 | 0.014294 |
| CRB1     | -0.27247 | 0.000234 | 0.00099  |
| CRB2     | -0.13578 | 0.070738 | 0.128363 |
| CRB3     | 0.272106 | 0.000238 | 0.001007 |
| CRBN     | -0.21538 | 0.003887 | 0.011041 |
| CRCP     | -0.10079 | 0.180678 | 0.274108 |
| CRCT1    | 0.441258 | 7.05E-10 | 1.56E-08 |
| CREB1    | -0.04082 | 0.588554 | 0.686556 |
| CREB3L1  | 0.358068 | 9.24E-07 | 8.09E-06 |
| CREB3L2  | -0.44582 | 4.48E-10 | 1.05E-08 |
| CREB3L3  | 0.186217 | 0.012819 | 0.030541 |
| CREB3L4  | 0.142109 | 0.05846  | 0.10922  |
| CREB3    | 0.160324 | 0.032536 | 0.067045 |
| CREB5    | 0.043248 | 0.566503 | 0.666778 |
| CREBBP   | -0.23908 | 0.001309 | 0.00433  |
| CREBL2   | -0.46372 | 7.09E-11 | 2.08E-09 |
| CREBZF   | 0.061037 | 0.418315 | 0.530581 |
| CREG1    | -0.04309 | 0.567926 | 0.667826 |
| CREG2    | 0.466697 | 5.16E-11 | 1.57E-09 |
| CRELD1   | -0.01542 | 0.838128 | 0.885817 |
| CRELD2   | -0.18246 | 0.014782 | 0.034428 |
| CREM     | -0.16504 | 0.027696 | 0.058498 |
| CRHBP    | -0.33935 | 3.59E-06 | 2.66E-05 |
| CRHR1    | -0.13088 | 0.081619 | 0.144657 |
| CRHR2    | -0.1272  | 0.09064  | 0.157252 |
| CRH      | -0.05322 | 0.480474 | 0.589934 |
| CRIM1    | -0.04477 | 0.552872 | 0.654837 |
| CRIP1    | 0.555185 | 8.82E-16 | 8.23E-14 |
| CRIP2    | 0.178834 | 0.016921 | 0.038552 |
| CRIP3    | -0.19234 | 0.010109 | 0.024927 |
| CRIPAK   | -0.00711 | 0.924982 | 0.948125 |
| CRIPT    | 0.095602 | 0.204293 | 0.303185 |
| CRISP1   | 0.053156 | 0.481002 | 0.590473 |
| CRISP2   | -0.00325 | 0.965684 | 0.976806 |
| CRISP3   | 0.137322 | 0.06757  | 0.123448 |
| CRISPLD1 | -0.08539 | 0.257086 | 0.363453 |
| CRISPLD2 | -0.01803 | 0.811215 | 0.866471 |
| CRKL     | -0.43344 | 1.51E-09 | 3.01E-08 |
| CRK      | -0.27401 | 0.000215 | 0.000918 |
| CRLF1    | 0.138192 | 0.065832 | 0.120825 |
| CRLF2    | -0.09255 | 0.219183 | 0.320802 |
| CRLF3    | 0.15865  | 0.034416 | 0.070311 |
| CRLS1    | 0.174633 | 0.019731 | 0.043922 |
| CRMP1    | -0.27447 | 0.000209 | 0.0009   |
| CRNKL1   | -0.25464 | 0.000603 | 0.002227 |
| CRNN     | -0.01715 | 0.820222 | 0.872649 |
| CROCCL1  | -0.00442 | 0.953337 | 0.968272 |
| CROCCL2  | -0.03455 | 0.647093 | 0.73704  |

|           |          |          |          |
|-----------|----------|----------|----------|
| CROCC     | 0.102125 | 0.174952 | 0.267309 |
| CROT      | 0.029466 | 0.696208 | 0.777699 |
| CRP       | 0.166773 | 0.026084 | 0.055628 |
| CRTAC1    | -0.09516 | 0.206416 | 0.305651 |
| CRTAM     | 0.011274 | 0.881275 | 0.91761  |
| CRTAP     | 0.176492 | 0.018441 | 0.041434 |
| CRTC1     | -0.25425 | 0.000615 | 0.002264 |
| CRTC2     | 0.253122 | 0.000652 | 0.002376 |
| CRTC3     | -0.18372 | 0.014094 | 0.033033 |
| CRX       | 0.060739 | 0.420592 | 0.532785 |
| CRY1      | -0.34776 | 1.97E-06 | 1.57E-05 |
| CRY2      | -0.31495 | 1.85E-05 | 0.000111 |
| CRYAA     | -0.0269  | 0.72155  | 0.797759 |
| CRYAB     | -0.05338 | 0.479143 | 0.588629 |
| CRYBA1    | -0.10878 | 0.148343 | 0.234162 |
| CRYBA2    | -0.1256  | 0.094828 | 0.163253 |
| CRYBA4    | -0.01874 | 0.803965 | 0.861571 |
| CRYBB1    | -0.04149 | 0.582445 | 0.681293 |
| CRYBB2    | -0.11487 | 0.126795 | 0.206273 |
| CRYBB3    | 0.199228 | 0.007674 | 0.019712 |
| CRYBG3    | 0.063561 | 0.399288 | 0.511832 |
| CRYGB     | -0.19627 | 0.008646 | 0.021804 |
| CRYGC     | -0.26514 | 0.000348 | 0.001395 |
| CRYGD     | -0.17519 | 0.019333 | 0.043136 |
| CRYGN     | 0.014711 | 0.845476 | 0.89108  |
| CRYGS     | 0.174581 | 0.019768 | 0.043995 |
| CRYL1     | 0.084929 | 0.25968  | 0.366178 |
| CRYM      | 0.015243 | 0.839962 | 0.886938 |
| CRYZL1    | 0.147846 | 0.048901 | 0.09422  |
| CRYZ      | 0.281947 | 0.000137 | 0.000628 |
| CSAD      | -0.04723 | 0.531321 | 0.635553 |
| CSAG1     | 0.025268 | 0.737774 | 0.810711 |
| CSAG2     | 0.064086 | 0.395403 | 0.508203 |
| CSAG3     | 0.094618 | 0.209013 | 0.308711 |
| CSDAP1    | 0.208572 | 0.005208 | 0.014175 |
| CSDA      | 0.306693 | 3.13E-05 | 0.000175 |
| CSDC2     | 0.027242 | 0.718132 | 0.795092 |
| CSDE1     | -0.10272 | 0.172425 | 0.264223 |
| CSE1L     | -0.09694 | 0.197982 | 0.295352 |
| CSF1R     | -0.06192 | 0.411605 | 0.523649 |
| CSF1      | -0.03273 | 0.664501 | 0.752482 |
| CSF2RA    | 0.090031 | 0.232039 | 0.335601 |
| CSF2RB    | -0.03493 | 0.643442 | 0.73379  |
| CSF2      | 0.427553 | 2.64E-09 | 4.95E-08 |
| CSF3R     | 0.06858  | 0.363035 | 0.476295 |
| CSF3      | -0.15689 | 0.036492 | 0.07382  |
| CSGALNACT | -0.29344 | 7.03E-05 | 0.00035  |
| CSGALNACT | 0.007609 | 0.919707 | 0.944279 |
| CSH2      | 0.000424 | 0.995514 | 0.996921 |
| CSK       | 0.118871 | 0.114023 | 0.189741 |
| CSMD1     | -0.11747 | 0.118378 | 0.195318 |
| CSMD2     | -0.02223 | 0.768365 | 0.834999 |
| CSMD3     | -0.32045 | 1.30E-05 | 8.13E-05 |
| CSN1S1    | -0.27543 | 0.000198 | 0.00086  |



|          |          |          |          |
|----------|----------|----------|----------|
| CSN2     | -0.18123 | 0.015482 | 0.035782 |
| CSN3     | -0.09862 | 0.190323 | 0.285933 |
| CSNK1A1L | -0.09138 | 0.225066 | 0.327383 |
| CSNK1A1P | -0.15324 | 0.041133 | 0.081623 |
| CSNK1A1  | 0.056041 | 0.457481 | 0.568445 |
| CSNK1D   | -0.17987 | 0.016281 | 0.037379 |
| CSNK1E   | 0.097253 | 0.196553 | 0.293531 |
| CSNK1G1  | -0.30248 | 4.07E-05 | 0.00022  |
| CSNK1G2  | 0.163427 | 0.029279 | 0.061364 |
| CSNK1G3  | -0.07052 | 0.349568 | 0.46218  |
| CSNK2A1P | -0.17054 | 0.022845 | 0.049658 |
| CSNK2A1  | -0.0158  | 0.834191 | 0.882526 |
| CSNK2A2  | 0.0105   | 0.889372 | 0.923124 |
| CSNK2B   | 0.185271 | 0.013291 | 0.031463 |
| CSPG4    | 0.157141 | 0.03619  | 0.073308 |
| CSPG5    | -0.11976 | 0.111329 | 0.186322 |
| CSPP1    | -0.21611 | 0.003764 | 0.010742 |
| CSRNP1   | -0.06133 | 0.416115 | 0.528469 |
| CSRNP2   | -0.29598 | 6.04E-05 | 0.000308 |
| CSRNP3   | -0.20833 | 0.005261 | 0.014299 |
| CSRP1    | 0.135292 | 0.071767 | 0.129968 |
| CSRP2BP  | -0.30096 | 4.46E-05 | 0.000238 |
| CSRP2    | 0.144168 | 0.054867 | 0.103772 |
| CSRP3    | -0.00975 | 0.897204 | 0.928427 |
| CST11    | -0.03793 | 0.615233 | 0.710236 |
| CST1     | 0.48873  | 4.48E-12 | 1.74E-10 |
| CST2     | 0.371528 | 3.29E-07 | 3.31E-06 |
| CST3     | -0.01142 | 0.879718 | 0.91652  |
| CST4     | 0.572433 | 6.96E-17 | 9.00E-15 |
| CST5     | 0.279893 | 0.000154 | 0.000694 |
| CST6     | 0.489629 | 4.04E-12 | 1.61E-10 |
| CST7     | 0.055659 | 0.460558 | 0.570869 |
| CST9L    | 0.057082 | 0.449158 | 0.56018  |
| CST9     | 0.247494 | 0.000866 | 0.003038 |
| CSTA     | 0.443351 | 5.73E-10 | 1.31E-08 |
| CSTB     | 0.572351 | 7.05E-17 | 9.05E-15 |
| CSTF1    | -0.35321 | 1.32E-06 | 1.10E-05 |
| CSTF2T   | -0.26157 | 0.000421 | 0.001639 |
| CSTF2    | 0.237093 | 0.00144  | 0.004703 |
| CSTF3    | -0.12817 | 0.088195 | 0.153885 |
| CSTL1    | 0.047641 | 0.527718 | 0.632737 |
| CSTT     | 0.191758 | 0.010342 | 0.025407 |
| CS       | -0.2318  | 0.00185  | 0.005836 |
| CT45A1   | -0.11781 | 0.117321 | 0.193858 |
| CT45A4   | -0.06391 | 0.396733 | 0.509448 |
| CT45A5   | -0.02765 | 0.714111 | 0.791926 |
| CT62     | 0.14584  | 0.052084 | 0.099345 |
| CTAG1B   | -0.07332 | 0.33075  | 0.442764 |
| CTAG2    | -0.02448 | 0.745632 | 0.816895 |
| CTAGE1   | -0.12546 | 0.095176 | 0.163767 |
| CTAGE4   | 0.409556 | 1.37E-08 | 2.07E-07 |
| CTAGE5   | -0.01119 | 0.882188 | 0.918125 |
| CTAGE6   | 0.262061 | 0.00041  | 0.001604 |
| CTAGE9   | 0.382748 | 1.34E-07 | 1.51E-06 |

|           |          |          |          |
|-----------|----------|----------|----------|
| CTBP1     | -0.01236 | 0.869933 | 0.910306 |
| CTBP2     | 0.314136 | 1.95E-05 | 0.000116 |
| CTBS      | -0.26024 | 0.000451 | 0.001741 |
| CTCFL     | 0.091371 | 0.225135 | 0.32746  |
| CTCF      | -0.13023 | 0.083154 | 0.14676  |
| CTDP1     | -0.20734 | 0.005485 | 0.014801 |
| CTDSP1    | 0.475402 | 2.01E-11 | 6.66E-10 |
| CTDSP2    | -0.25508 | 0.00059  | 0.002187 |
| CTDSPL2   | -0.05055 | 0.502753 | 0.609904 |
| CTDSPL    | 0.279561 | 0.000157 | 0.000706 |
| CTF1      | 0.136604 | 0.06903  | 0.12576  |
| CTGF      | -0.02881 | 0.702605 | 0.782986 |
| CTHRC1    | 0.280201 | 0.000152 | 0.000684 |
| CTH       | -0.12251 | 0.103282 | 0.175298 |
| CTLA4     | 0.069172 | 0.3589   | 0.472053 |
| CTNNA1    | 0.506501 | 5.47E-13 | 2.72E-11 |
| CTNNA2    | -0.20708 | 0.005546 | 0.014941 |
| CTNNA3    | -0.07336 | 0.3305   | 0.442649 |
| CTNNAL1   | 0.111646 | 0.137892 | 0.220797 |
| CTNNB1    | 0.23747  | 0.001414 | 0.004628 |
| CTNNBIP1  | -0.00971 | 0.897597 | 0.92859  |
| CTNNBL1   | 0.224324 | 0.002611 | 0.007845 |
| CTNND1    | 0.313377 | 2.05E-05 | 0.000121 |
| CTNND2    | -0.17732 | 0.017889 | 0.040423 |
| CTNS      | -0.36963 | 3.82E-07 | 3.77E-06 |
| CTPS2     | 0.057617 | 0.444912 | 0.556394 |
| CTPS      | 0.012932 | 0.863966 | 0.90574  |
| CTR9      | -0.32413 | 1.02E-05 | 6.59E-05 |
| CTRB1     | -0.0231  | 0.759576 | 0.828362 |
| CTRB2     | -0.01985 | 0.792594 | 0.853124 |
| CTRC      | -0.05551 | 0.461757 | 0.571997 |
| CTRL      | -0.12708 | 0.09095  | 0.157745 |
| CTSA      | 0.185459 | 0.013196 | 0.031283 |
| CTSB      | 0.280943 | 0.000145 | 0.000659 |
| CTSC      | 0.196502 | 0.008567 | 0.021654 |
| CTSD      | 0.36773  | 4.43E-07 | 4.28E-06 |
| CTSE      | 0.559507 | 4.73E-16 | 4.73E-14 |
| CTSF      | -0.10666 | 0.156453 | 0.244614 |
| CTSG      | -0.16964 | 0.02359  | 0.051108 |
| CTSH      | 0.434279 | 1.39E-09 | 2.81E-08 |
| CTSK      | 0.162813 | 0.029901 | 0.0625   |
| CTSL1     | -0.02445 | 0.745969 | 0.817174 |
| CTSL2     | 0.382794 | 1.34E-07 | 1.51E-06 |
| CTSL3     | -0.07727 | 0.305263 | 0.415493 |
| CTS0      | -0.09636 | 0.200697 | 0.298749 |
| CTSS      | 0.228592 | 0.002147 | 0.006638 |
| CTSW      | 0.008139 | 0.914134 | 0.939994 |
| CTSZ      | 0.271904 | 0.000241 | 0.001016 |
| CTTNBP2NL | 0.229033 | 0.002104 | 0.006519 |
| CTTNBP2   | -0.2491  | 0.000799 | 0.002847 |
| CTTN      | 0.61837  | 3.69E-20 | 1.09E-17 |
| CTU1      | 0.045953 | 0.542466 | 0.645565 |
| CTU2      | 0.131647 | 0.079834 | 0.141969 |
| CTXN1     | 0.072201 | 0.338189 | 0.450375 |

|         |          |          |          |
|---------|----------|----------|----------|
| CTXN2   | -0.33497 | 4.87E-06 | 3.48E-05 |
| CTXN3   | -0.12409 | 0.098882 | 0.168982 |
| CUBN    | -0.28294 | 0.00013  | 0.000597 |
| CUEDC1  | 0.006571 | 0.930633 | 0.952108 |
| CUEDC2  | 0.018809 | 0.80321  | 0.86127  |
| CUL1    | -0.3225  | 1.13E-05 | 7.25E-05 |
| CUL2    | -0.11733 | 0.118827 | 0.195922 |
| CUL3    | -0.0645  | 0.392339 | 0.504986 |
| CUL4A   | 0.269768 | 0.000271 | 0.001124 |
| CUL4B   | -0.2851  | 0.000115 | 0.000536 |
| CUL5    | -0.24364 | 0.001048 | 0.003572 |
| CUL7    | -0.3029  | 3.96E-05 | 0.000215 |
| CUL9    | -0.17819 | 0.017329 | 0.039337 |
| CUTA    | 0.0038   | 0.959847 | 0.972536 |
| CUTC    | -0.03419 | 0.65053  | 0.739583 |
| CUX1    | 0.158581 | 0.034496 | 0.070432 |
| CUX2    | -0.30874 | 2.75E-05 | 0.000156 |
| CUZD1   | -0.08045 | 0.285766 | 0.394742 |
| CWC15   | 0.320171 | 1.32E-05 | 8.27E-05 |
| CWC22   | 0.056981 | 0.44996  | 0.560815 |
| CWC25   | 0.014175 | 0.851042 | 0.895753 |
| CWC27   | 0.092503 | 0.219417 | 0.320985 |
| CWF19L1 | -0.06824 | 0.365401 | 0.478682 |
| CWF19L2 | -0.00457 | 0.951737 | 0.967243 |
| CWH43   | 0.156571 | 0.03688  | 0.074475 |
| CX3CL1  | 0.137646 | 0.066919 | 0.122489 |
| CX3CR1  | -0.11789 | 0.117073 | 0.193562 |
| CXADRP2 | 0.027657 | 0.714024 | 0.791888 |
| CXADRP3 | -0.09413 | 0.211399 | 0.311606 |
| CXADR   | 0.087828 | 0.243705 | 0.348371 |
| CXCL10  | 0.092587 | 0.218994 | 0.320603 |
| CXCL11  | 0.08922  | 0.236287 | 0.340207 |
| CXCL12  | -0.29118 | 8.04E-05 | 0.000393 |
| CXCL13  | -0.07162 | 0.342124 | 0.454479 |
| CXCL14  | 0.447884 | 3.64E-10 | 8.80E-09 |
| CXCL16  | 0.250751 | 0.000736 | 0.002644 |
| CXCL17  | 0.462524 | 8.05E-11 | 2.32E-09 |
| CXCL1   | 0.170538 | 0.02285  | 0.049664 |
| CXCL2   | 0.083571 | 0.267405 | 0.374988 |
| CXCL3   | 0.274983 | 0.000203 | 0.000878 |
| CXCL5   | 0.337715 | 4.02E-06 | 2.94E-05 |
| CXCL6   | 0.213464 | 0.004224 | 0.011852 |
| CXCL9   | -0.02104 | 0.780461 | 0.843877 |
| CXCR1   | -0.04673 | 0.535616 | 0.639207 |
| CXCR2P1 | -0.1344  | 0.073683 | 0.132733 |
| CXCR2   | -0.10587 | 0.159571 | 0.248239 |
| CXCR3   | 0.230266 | 0.001987 | 0.006199 |
| CXCR4   | 0.074958 | 0.32002  | 0.431833 |
| CXCR5   | -0.02825 | 0.708119 | 0.787445 |
| CXCR6   | -0.11709 | 0.119592 | 0.196839 |
| CXCR7   | 0.11211  | 0.136251 | 0.218705 |
| CXXC1   | -0.20407 | 0.006291 | 0.016651 |
| CXXC4   | -0.4862  | 5.98E-12 | 2.29E-10 |
| CXXC5   | -0.06    | 0.426314 | 0.538516 |

|          |          |          |          |
|----------|----------|----------|----------|
| CXorf1   | -0.27295 | 0.000228 | 0.000967 |
| CXorf21  | -0.01855 | 0.805839 | 0.862498 |
| CXorf22  | -0.05756 | 0.445343 | 0.556721 |
| CXorf23  | 0.079313 | 0.292627 | 0.402225 |
| CXorf26  | 0.301579 | 4.30E-05 | 0.000231 |
| CXorf27  | 0.093861 | 0.212692 | 0.313163 |
| CXorf30  | -0.07608 | 0.312833 | 0.423783 |
| CXorf36  | -0.16014 | 0.032734 | 0.067377 |
| CXorf38  | 0.278372 | 0.000168 | 0.000746 |
| CXorf40A | -0.14141 | 0.059726 | 0.111155 |
| CXorf40B | -0.12953 | 0.084841 | 0.14915  |
| CXorf41  | -0.01234 | 0.870143 | 0.910333 |
| CXorf42  | -0.30034 | 4.64E-05 | 0.000246 |
| CXorf48  | -0.07532 | 0.31771  | 0.42936  |
| CXorf49B | 0.286094 | 0.000108 | 0.000509 |
| CXorf50B | -0.18162 | 0.015253 | 0.035326 |
| CXorf56  | -0.18813 | 0.011913 | 0.028692 |
| CXorf57  | -0.40814 | 1.56E-08 | 2.30E-07 |
| CXorf58  | -0.29839 | 5.22E-05 | 0.000272 |
| CXorf59  | -0.0043  | 0.954525 | 0.968782 |
| CXorf61  | 0.095503 | 0.204766 | 0.303719 |
| CXorf64  | 0.064715 | 0.390768 | 0.503423 |
| CXorf65  | 0.14831  | 0.048189 | 0.093091 |
| CYB561D1 | -0.40136 | 2.82E-08 | 3.86E-07 |
| CYB561D2 | -0.18739 | 0.012257 | 0.029375 |
| CYB561   | -0.06151 | 0.414709 | 0.526921 |
| CYB5A    | -0.10543 | 0.161334 | 0.250508 |
| CYB5B    | 0.356139 | 1.07E-06 | 9.20E-06 |
| CYB5D1   | -0.50669 | 5.34E-13 | 2.69E-11 |
| CYB5D2   | -0.36201 | 6.86E-07 | 6.28E-06 |
| CYB5R1   | 0.074575 | 0.322503 | 0.434328 |
| CYB5R2   | 0.417872 | 6.49E-09 | 1.09E-07 |
| CYB5R3   | 0.019091 | 0.800316 | 0.859518 |
| CYB5R4   | -0.14852 | 0.047873 | 0.092635 |
| CYB5RL   | -0.38019 | 1.65E-07 | 1.82E-06 |
| CYBASC3  | -0.07415 | 0.325259 | 0.437401 |
| CYBA     | 0.498894 | 1.36E-12 | 6.19E-11 |
| CYBB     | -0.0012  | 0.987353 | 0.991062 |
| CYBRD1   | 0.160385 | 0.032469 | 0.066942 |
| CYC1     | 0.02044  | 0.786536 | 0.848804 |
| CYCSP52  | -0.06053 | 0.422188 | 0.534397 |
| CYCS     | -0.09331 | 0.215422 | 0.316382 |
| CYFIP1   | 0.280779 | 0.000147 | 0.000664 |
| CYFIP2   | -0.31512 | 1.83E-05 | 0.00011  |
| CYGB     | 0.064967 | 0.388924 | 0.50144  |
| CYHR1    | 0.070509 | 0.349663 | 0.462216 |
| CYLC2    | -0.04993 | 0.508025 | 0.614716 |
| CYLD     | -0.25117 | 0.00072  | 0.002598 |
| CYMP     | 0.394491 | 5.07E-08 | 6.46E-07 |
| CYP11A1  | 0.045837 | 0.543484 | 0.646466 |
| CYP11B1  | 0.039191 | 0.603487 | 0.699616 |
| CYP11B2  | 0.076991 | 0.30703  | 0.417437 |
| CYP17A1  | 0.096712 | 0.199065 | 0.296678 |
| CYP19A1  | -0.05281 | 0.483862 | 0.592953 |

|          |          |          |          |
|----------|----------|----------|----------|
| CYP1A1   | -0.07183 | 0.340713 | 0.453017 |
| CYP1A2   | -0.06764 | 0.369684 | 0.483036 |
| CYP1B1   | 0.012413 | 0.869374 | 0.909971 |
| CYP20A1  | -0.20777 | 0.005386 | 0.014581 |
| CYP21A2  | 0.010258 | 0.891899 | 0.924679 |
| CYP24A1  | 0.197653 | 0.008179 | 0.020831 |
| CYP26A1  | 0.296929 | 5.70E-05 | 0.000293 |
| CYP26B1  | -0.10482 | 0.163798 | 0.253637 |
| CYP26C1  | 0.0701   | 0.35247  | 0.465208 |
| CYP27A1  | 0.03642  | 0.629347 | 0.722019 |
| CYP27B1  | 0.226486 | 0.002366 | 0.007209 |
| CYP27C1  | 0.413026 | 1.01E-08 | 1.58E-07 |
| CYP2A13  | 0.165253 | 0.027497 | 0.058158 |
| CYP2A6   | 0.010005 | 0.894552 | 0.926369 |
| CYP2A7   | -0.03947 | 0.600873 | 0.697378 |
| CYP2B6   | 0.185496 | 0.013177 | 0.031247 |
| CYP2B7P1 | 0.158589 | 0.034487 | 0.07042  |
| CYP2C18  | 0.503866 | 7.52E-13 | 3.55E-11 |
| CYP2C19  | 0.391461 | 6.55E-08 | 8.05E-07 |
| CYP2C8   | -0.14874 | 0.047541 | 0.092129 |
| CYP2C9   | 0.482615 | 8.98E-12 | 3.26E-10 |
| CYP2D6   | 0.107282 | 0.154054 | 0.241536 |
| CYP2D7P1 | 0.144114 | 0.054959 | 0.103936 |
| CYP2E1   | -0.05397 | 0.474319 | 0.584016 |
| CYP2F1   | 0.111703 | 0.137688 | 0.220636 |
| CYP2J2   | 0.404746 | 2.10E-08 | 2.99E-07 |
| CYP2R1   | 0.256567 | 0.000546 | 0.002052 |
| CYP2S1   | 0.510088 | 3.52E-13 | 1.82E-11 |
| CYP2U1   | -0.40998 | 1.32E-08 | 2.01E-07 |
| CYP2W1   | 0.421515 | 4.64E-09 | 8.12E-08 |
| CYP39A1  | -0.31186 | 2.26E-05 | 0.000131 |
| CYP3A43  | -0.12051 | 0.109072 | 0.18326  |
| CYP3A4   | 0.014818 | 0.84436  | 0.890283 |
| CYP3A5   | 0.416117 | 7.62E-09 | 1.25E-07 |
| CYP3A7   | 0.111604 | 0.138041 | 0.220969 |
| CYP46A1  | -0.38176 | 1.46E-07 | 1.62E-06 |
| CYP4A11  | 0.009498 | 0.899872 | 0.930178 |
| CYP4A22  | -0.00217 | 0.977091 | 0.984158 |
| CYP4B1   | 0.248216 | 0.000836 | 0.002946 |
| CYP4F11  | 0.434747 | 1.33E-09 | 2.70E-08 |
| CYP4F12  | 0.623646 | 1.43E-20 | 4.80E-18 |
| CYP4F22  | 0.293004 | 7.22E-05 | 0.000358 |
| CYP4F2   | 0.182836 | 0.014575 | 0.03403  |
| CYP4F3   | 0.331895 | 6.02E-06 | 4.19E-05 |
| CYP4F8   | 0.177061 | 0.018062 | 0.040719 |
| CYP4V2   | -0.2024  | 0.006739 | 0.01768  |
| CYP4X1   | 0.108941 | 0.147751 | 0.233358 |
| CYP4Z1   | -0.11018 | 0.143171 | 0.227552 |
| CYP4Z2P  | -0.03357 | 0.656434 | 0.745225 |
| CYP51A1  | 0.106229 | 0.158161 | 0.246588 |
| CYP7A1   | -0.05814 | 0.440754 | 0.552556 |
| CYP7B1   | -0.11886 | 0.114046 | 0.189763 |
| CYP8B1   | -0.17786 | 0.017539 | 0.039728 |
| CYR61    | 0.001368 | 0.98554  | 0.989849 |

|          |          |          |          |
|----------|----------|----------|----------|
| CYS1     | 0.134798 | 0.07282  | 0.131454 |
| CYSLTR1  | -0.15444 | 0.039552 | 0.078977 |
| CYSLTR2  | -0.1825  | 0.014759 | 0.0344   |
| CYTH1    | 0.247993 | 0.000845 | 0.002974 |
| CYTH2    | 0.355688 | 1.10E-06 | 9.47E-06 |
| CYTH3    | 0.140483 | 0.061433 | 0.113861 |
| CYTH4    | -0.01828 | 0.808684 | 0.864555 |
| CYTIP    | 0.017415 | 0.81753  | 0.870769 |
| CYTL1    | -0.07187 | 0.34042  | 0.452739 |
| CY TSA   | -0.53426 | 1.59E-14 | 1.13E-12 |
| CY TSB   | 0.240682 | 0.001211 | 0.004052 |
| CYYR1    | -0.21687 | 0.003641 | 0.010427 |
| CYorf15A | -0.06636 | 0.378805 | 0.491437 |
| CYorf15B | -0.03885 | 0.606604 | 0.702516 |
| D2HGDH   | 0.255264 | 0.000584 | 0.002171 |
| D4S234E  | -0.14932 | 0.046674 | 0.090697 |
| DAAM1    | -0.24758 | 0.000863 | 0.003029 |
| DAAM2    | -0.1221  | 0.104465 | 0.176978 |
| DAB1     | -0.29341 | 7.04E-05 | 0.000351 |
| DAB2IP   | 0.062746 | 0.405379 | 0.517961 |
| DAB2     | -0.0655  | 0.385017 | 0.497765 |
| DACH1    | -0.2142  | 0.004092 | 0.011549 |
| DACH2    | -0.17322 | 0.020765 | 0.045812 |
| DACT1    | 0.027949 | 0.711135 | 0.789689 |
| DACT2    | -0.16215 | 0.030582 | 0.063696 |
| DACT3    | 0.165141 | 0.027603 | 0.058349 |
| DAD1L    | 0.047783 | 0.526486 | 0.631758 |
| DAD1     | 0.142463 | 0.05783  | 0.108289 |
| DAG1     | 0.174022 | 0.020172 | 0.044737 |
| DAGLA    | -0.10916 | 0.146916 | 0.232373 |
| DAGLB    | 0.301579 | 4.30E-05 | 0.000231 |
| DAK      | 0.32833  | 7.67E-06 | 5.16E-05 |
| DALRD3   | 0.214843 | 0.003978 | 0.011275 |
| DAND5    | 0.29089  | 8.18E-05 | 0.000399 |
| DAO      | -0.08353 | 0.267641 | 0.37521  |
| DAP3     | 0.205055 | 0.006037 | 0.016057 |
| DAPK1    | 0.294591 | 6.56E-05 | 0.00033  |
| DAPK2    | -0.11366 | 0.13088  | 0.211648 |
| DAPK3    | 0.119611 | 0.11177  | 0.186877 |
| DAPL1    | -0.01174 | 0.876366 | 0.914424 |
| DAPP1    | 0.494943 | 2.18E-12 | 9.29E-11 |
| DAP      | -0.06678 | 0.375827 | 0.488823 |
| DARC     | -0.09591 | 0.202833 | 0.301432 |
| DARS2    | 0.119315 | 0.112668 | 0.188017 |
| DARS     | 0.210161 | 0.004868 | 0.013392 |
| DAXX     | 0.147372 | 0.049638 | 0.095427 |
| DAZ1     | -0.06292 | 0.404077 | 0.516731 |
| DAZ2     | -0.07262 | 0.335398 | 0.447549 |
| DAZ3     | -0.05971 | 0.4285   | 0.540552 |
| DAZAP1   | 0.222335 | 0.002856 | 0.008478 |
| DAZAP2   | -0.06056 | 0.421949 | 0.534162 |
| DAZL     | -0.18303 | 0.01447  | 0.033817 |
| DBC1     | -0.19126 | 0.010545 | 0.025851 |
| DBF4B    | -0.17169 | 0.02193  | 0.047942 |

|          |          |          |          |
|----------|----------|----------|----------|
| DBF4     | -0.02936 | 0.697222 | 0.778573 |
| DBH      | -0.09795 | 0.193367 | 0.289714 |
| DBI      | 0.322759 | 1.11E-05 | 7.15E-05 |
| DBN1     | 0.207131 | 0.005535 | 0.014918 |
| DBNDD1   | 0.265111 | 0.000348 | 0.001397 |
| DBNDD2   | 0.398552 | 3.59E-08 | 4.74E-07 |
| DBNL     | 0.295803 | 6.10E-05 | 0.00031  |
| DBP      | 0.098489 | 0.190898 | 0.286645 |
| DBR1     | -0.05605 | 0.457396 | 0.568375 |
| DBT      | -0.10329 | 0.17006  | 0.261491 |
| DBX1     | 0.020743 | 0.783449 | 0.846368 |
| DBX2     | -0.05287 | 0.483374 | 0.592465 |
| DCAF10   | -0.42654 | 2.91E-09 | 5.40E-08 |
| DCAF11   | -0.30789 | 2.90E-05 | 0.000164 |
| DCAF12L1 | 0.044919 | 0.551593 | 0.653825 |
| DCAF12L2 | -0.15987 | 0.033033 | 0.067935 |
| DCAF12   | -0.15388 | 0.040291 | 0.080209 |
| DCAF13   | 0.03362  | 0.655949 | 0.744931 |
| DCAF15   | 0.280363 | 0.00015  | 0.000678 |
| DCAF16   | -0.29758 | 5.48E-05 | 0.000284 |
| DCAF17   | -0.11751 | 0.118247 | 0.195128 |
| DCAF4L1  | -0.03985 | 0.59743  | 0.694385 |
| DCAF4L2  | -0.21302 | 0.004306 | 0.012041 |
| DCAF4    | 0.155663 | 0.038002 | 0.076328 |
| DCAF5    | -0.05637 | 0.45483  | 0.565862 |
| DCAF6    | -0.00566 | 0.940221 | 0.959782 |
| DCAF7    | -0.35949 | 8.30E-07 | 7.39E-06 |
| DCAF8L1  | -0.17187 | 0.021791 | 0.047681 |
| DCAF8L2  | -0.0632  | 0.401991 | 0.514664 |
| DCAF8    | -0.10089 | 0.18026  | 0.273571 |
| DCAKD    | -0.2018  | 0.006909 | 0.018051 |
| DCBLD1   | 0.2387   | 0.001333 | 0.004398 |
| DCBLD2   | 0.309274 | 2.66E-05 | 0.000152 |
| DCC      | -0.27613 | 0.000191 | 0.000831 |
| DCDC1    | -0.27107 | 0.000252 | 0.001056 |
| DCDC2B   | 0.02839  | 0.706785 | 0.786537 |
| DCDC2    | -0.06348 | 0.399905 | 0.512424 |
| DCHS1    | -0.11784 | 0.117218 | 0.193738 |
| DCHS2    | -0.0628  | 0.404957 | 0.517523 |
| DCI      | 0.128821 | 0.086578 | 0.151692 |
| DCK      | -0.3111  | 2.37E-05 | 0.000137 |
| DCLK1    | -0.1673  | 0.025608 | 0.054731 |
| DCLK2    | -0.2728  | 0.000229 | 0.000973 |
| DCLK3    | -0.11358 | 0.131158 | 0.212061 |
| DCLRE1A  | -0.35781 | 9.42E-07 | 8.23E-06 |
| DCLRE1B  | 0.096646 | 0.199375 | 0.297074 |
| DCLRE1C  | 0.154849 | 0.039032 | 0.078064 |
| DCN      | 0.075039 | 0.319495 | 0.431242 |
| DCP1A    | -0.18756 | 0.012176 | 0.029216 |
| DCP1B    | -0.33987 | 3.46E-06 | 2.58E-05 |
| DCP2     | -0.0788  | 0.295743 | 0.405746 |
| DCPS     | 0.157009 | 0.036349 | 0.073576 |
| DCST1    | 0.268289 | 0.000294 | 0.001206 |
| DCST2    | 0.355733 | 1.10E-06 | 9.44E-06 |

|         |          |          |          |
|---------|----------|----------|----------|
| DCTD    | 0.181165 | 0.015517 | 0.035845 |
| DCTN1   | -0.04509 | 0.550094 | 0.652484 |
| DCTN2   | -0.03252 | 0.666525 | 0.753911 |
| DCTN3   | -0.14145 | 0.059651 | 0.111047 |
| DCTN4   | -0.4428  | 6.05E-10 | 1.38E-08 |
| DCTN5   | 0.358411 | 9.00E-07 | 7.92E-06 |
| DCTN6   | 0.063639 | 0.398711 | 0.511292 |
| DCTPP1  | 0.317434 | 1.58E-05 | 9.65E-05 |
| DCT     | -0.33374 | 5.30E-06 | 3.75E-05 |
| DCUN1D1 | -0.06325 | 0.401638 | 0.514277 |
| DCUN1D2 | -0.03542 | 0.638806 | 0.730029 |
| DCUN1D3 | -0.05315 | 0.481072 | 0.590522 |
| DCUN1D4 | -0.05945 | 0.430558 | 0.542456 |
| DCUN1D5 | -0.03544 | 0.638578 | 0.729898 |
| DCXR    | 0.002055 | 0.978281 | 0.985106 |
| DCX     | -0.32435 | 1.00E-05 | 6.50E-05 |
| DDA1    | 0.415951 | 7.73E-09 | 1.27E-07 |
| DDAH1   | 0.063165 | 0.402243 | 0.514919 |
| DDAH2   | 0.429059 | 2.29E-09 | 4.36E-08 |
| DDB1    | -0.10774 | 0.152297 | 0.23925  |
| DDB2    | 0.089385 | 0.235416 | 0.339344 |
| DDC     | -0.22085 | 0.003052 | 0.008967 |
| DDHD1   | -0.21544 | 0.003876 | 0.011015 |
| DDHD2   | -0.04967 | 0.510258 | 0.616763 |
| DDI1    | -0.20779 | 0.005382 | 0.01457  |
| DDI2    | -0.21743 | 0.003552 | 0.010197 |
| DDIT3   | 0.10647  | 0.157215 | 0.245534 |
| DDIT4L  | 0.246711 | 0.000901 | 0.003141 |
| DDIT4   | 0.386827 | 9.63E-08 | 1.13E-06 |
| DDN     | -0.16208 | 0.030658 | 0.06384  |
| DDOST   | -0.08592 | 0.254142 | 0.360321 |
| DDO     | -0.10451 | 0.16506  | 0.255234 |
| DDR1    | 0.271286 | 0.000249 | 0.001045 |
| DDR2    | -0.07731 | 0.305027 | 0.415484 |
| DRGK1   | -0.06501 | 0.388598 | 0.501183 |
| DDTL    | 0.069639 | 0.355653 | 0.468689 |
| DDT     | 0.030092 | 0.690084 | 0.773172 |
| DDX10   | 0.132774 | 0.077265 | 0.138116 |
| DDX11L2 | 0.036712 | 0.626608 | 0.719958 |
| DDX11   | 0.170855 | 0.022594 | 0.049199 |
| DDX12   | 0.172434 | 0.021357 | 0.046907 |
| DDX17   | -0.08915 | 0.236672 | 0.340609 |
| DDX18   | 0.192424 | 0.010074 | 0.024855 |
| DDX19A  | 0.034935 | 0.643406 | 0.73379  |
| DDX19B  | 0.465217 | 6.05E-11 | 1.81E-09 |
| DDX1    | 0.027078 | 0.71976  | 0.796225 |
| DDX20   | -0.17489 | 0.019546 | 0.043554 |
| DDX21   | -0.06504 | 0.388416 | 0.500981 |
| DDX23   | -0.10517 | 0.162374 | 0.251885 |
| DDX24   | -0.31883 | 1.44E-05 | 8.93E-05 |
| DDX25   | -0.34628 | 2.19E-06 | 1.73E-05 |
| DDX26B  | -0.0134  | 0.85911  | 0.901896 |
| DDX27   | 0.236529 | 0.001479 | 0.004812 |
| DDX28   | -0.02119 | 0.778918 | 0.842902 |



|           |          |          |          |
|-----------|----------|----------|----------|
| DDX31     | -0.28367 | 0.000125 | 0.000576 |
| DDX39     | 0.316107 | 1.72E-05 | 0.000104 |
| DDX3X     | -0.23262 | 0.001781 | 0.005644 |
| DDX3Y     | -0.05636 | 0.4549   | 0.565913 |
| DDX41     | 0.255668 | 0.000572 | 0.002135 |
| DDX42     | -0.15741 | 0.035871 | 0.072779 |
| DDX43     | 0.032689 | 0.664888 | 0.752673 |
| DDX46     | -0.17242 | 0.02137  | 0.046917 |
| DDX47     | 0.119039 | 0.113508 | 0.189011 |
| DDX49     | 0.120366 | 0.109512 | 0.183877 |
| DDX4      | 0.076238 | 0.311801 | 0.422673 |
| DDX50     | -0.08308 | 0.270249 | 0.378008 |
| DDX51     | -0.22659 | 0.002354 | 0.007179 |
| DDX52     | 0.142247 | 0.058214 | 0.108863 |
| DDX53     | -0.08502 | 0.25919  | 0.365591 |
| DDX54     | 0.067401 | 0.371361 | 0.484418 |
| DDX55     | -0.07387 | 0.327138 | 0.439082 |
| DDX56     | 0.094094 | 0.211554 | 0.311812 |
| DDX58     | 0.232623 | 0.00178  | 0.005643 |
| DDX59     | -0.11505 | 0.126225 | 0.205599 |
| DDX5      | -0.25083 | 0.000733 | 0.002635 |
| DDX60L    | 0.441482 | 6.90E-10 | 1.53E-08 |
| DDX60     | 0.332534 | 5.76E-06 | 4.03E-05 |
| DDX6      | -0.27925 | 0.00016  | 0.000716 |
| DEAF1     | -0.09058 | 0.229183 | 0.332199 |
| 1-Dec     | -0.06184 | 0.412181 | 0.524246 |
| DECR1     | 0.148856 | 0.04736  | 0.091868 |
| DECR2     | 0.27041  | 0.000262 | 0.001092 |
| DEDD2     | 0.292004 | 7.66E-05 | 0.000377 |
| DEDD      | 0.339916 | 3.45E-06 | 2.57E-05 |
| DEF6      | 0.289029 | 9.12E-05 | 0.000439 |
| DEF8      | -0.0912  | 0.226016 | 0.328525 |
| DEFA1B    | 0.005349 | 0.94351  | 0.961996 |
| DEFA4     | 0.022679 | 0.763812 | 0.831742 |
| DEFA5     | -0.08781 | 0.24378  | 0.348454 |
| DEFA6     | -0.0718  | 0.340868 | 0.453192 |
| DEFB103B  | 0.123341 | 0.100953 | 0.171956 |
| DEFB109P1 | 0.150132 | 0.045473 | 0.088843 |
| DEFB109P1 | 0.045077 | 0.550191 | 0.65256  |
| DEFB119   | -0.01158 | 0.878055 | 0.915366 |
| DEFB124   | -0.08945 | 0.23507  | 0.339048 |
| DEFB126   | -0.00982 | 0.896458 | 0.927897 |
| DEFB131   | -0.04649 | 0.537742 | 0.641101 |
| DEFB132   | -0.32358 | 1.05E-05 | 6.81E-05 |
| DEFB1     | 0.400174 | 3.12E-08 | 4.21E-07 |
| DEFB4A    | -0.03279 | 0.663903 | 0.75202  |
| DEGS1     | -0.10328 | 0.170083 | 0.261506 |
| DEGS2     | 0.238855 | 0.001323 | 0.004369 |
| DEK       | -0.10921 | 0.14674  | 0.232186 |
| DEM1      | -0.00145 | 0.984637 | 0.98929  |
| DENND1A   | -0.44662 | 4.14E-10 | 9.86E-09 |
| DENND1B   | 0.122795 | 0.102483 | 0.174158 |
| DENND1C   | -0.13226 | 0.078431 | 0.139881 |
| DENND2A   | -0.3113  | 2.34E-05 | 0.000135 |

|         |          |          |          |
|---------|----------|----------|----------|
| DENND2C | 0.04163  | 0.581123 | 0.679968 |
| DENND2D | 0.211247 | 0.004647 | 0.012859 |
| DENND3  | 0.210414 | 0.004815 | 0.013267 |
| DENND4A | -0.29785 | 5.40E-05 | 0.00028  |
| DENND4B | -0.14934 | 0.046643 | 0.090646 |
| DENND4C | -0.23483 | 0.001604 | 0.005161 |
| DENND5A | -0.26241 | 0.000402 | 0.001578 |
| DENND5B | -0.36797 | 4.35E-07 | 4.21E-06 |
| DENR    | -0.21919 | 0.003287 | 0.009539 |
| DEPDC1B | 0.401787 | 2.72E-08 | 3.74E-07 |
| DEPDC1  | 0.27205  | 0.000239 | 0.001009 |
| DEPDC4  | -0.23555 | 0.00155  | 0.005011 |
| DEPDC5  | -0.34108 | 3.18E-06 | 2.39E-05 |
| DEPDC6  | 0.005112 | 0.946005 | 0.963646 |
| DEPDC7  | 0.094221 | 0.210937 | 0.311251 |
| DERA    | 0.251132 | 0.000722 | 0.0026   |
| DERL1   | 0.028237 | 0.708291 | 0.787548 |
| DERL2   | -0.25316 | 0.000651 | 0.002373 |
| DERL3   | 0.111865 | 0.137115 | 0.219841 |
| DES     | 0.08049  | 0.285503 | 0.394462 |
| DET1    | -0.30124 | 4.39E-05 | 0.000235 |
| DEXI    | 0.034992 | 0.642864 | 0.733568 |
| DFFA    | -0.0219  | 0.771679 | 0.837431 |
| DFFB    | -0.06987 | 0.354035 | 0.466993 |
| DFNA5   | 0.169337 | 0.023842 | 0.051553 |
| DFNB31  | -0.40344 | 2.35E-08 | 3.32E-07 |
| DFNB59  | 0.180668 | 0.015808 | 0.036433 |
| DGAT1   | 0.346999 | 2.08E-06 | 1.65E-05 |
| DGAT2L6 | -0.05348 | 0.478336 | 0.587967 |
| DGAT2   | 0.022548 | 0.765135 | 0.832588 |
| DGCR10  | -0.11804 | 0.116588 | 0.192954 |
| DGCR11  | 0.18466  | 0.013603 | 0.03211  |
| DGCR14  | -0.02786 | 0.712026 | 0.790507 |
| DGCR2   | 0.123414 | 0.10075  | 0.171641 |
| DGCR5   | -0.13061 | 0.082256 | 0.145485 |
| DGCR6L  | -0.1029  | 0.17167  | 0.263373 |
| DGCR6   | -0.19222 | 0.010156 | 0.025028 |
| DGCR8   | -0.11769 | 0.117688 | 0.194352 |
| DGCR9   | -0.0661  | 0.380711 | 0.493488 |
| DGKA    | 0.526651 | 4.32E-14 | 2.79E-12 |
| DGKB    | -0.13523 | 0.071907 | 0.130162 |
| DGKD    | -0.07209 | 0.338968 | 0.451151 |
| DGKE    | -0.31782 | 1.54E-05 | 9.45E-05 |
| DGKG    | 0.067123 | 0.373345 | 0.486454 |
| DGKH    | 0.190783 | 0.010744 | 0.026262 |
| DGKI    | -0.05943 | 0.430688 | 0.542586 |
| DGKK    | -0.20742 | 0.005468 | 0.014762 |
| DGKQ    | 0.199197 | 0.007684 | 0.01973  |
| DGKZ    | -0.09753 | 0.195256 | 0.292013 |
| DGUOK   | 0.382973 | 1.32E-07 | 1.49E-06 |
| DHCR24  | 0.358956 | 8.64E-07 | 7.65E-06 |
| DHCR7   | 0.309142 | 2.68E-05 | 0.000153 |
| DHDDS   | -0.02194 | 0.771278 | 0.837291 |
| DHDH    | 0.189538 | 0.011278 | 0.027374 |

|         |          |          |          |
|---------|----------|----------|----------|
| DHDPSL  | -0.044   | 0.559747 | 0.660724 |
| DHFRL1  | -0.25785 | 0.000511 | 0.001937 |
| DHFR    | 0.161064 | 0.031732 | 0.065601 |
| DHH     | -0.12163 | 0.105815 | 0.178805 |
| DHODH   | 0.132201 | 0.078564 | 0.140058 |
| DHPS    | -0.02767 | 0.713846 | 0.79181  |
| DHRS11  | 0.168724 | 0.024363 | 0.052484 |
| DHRS12  | 0.05559  | 0.461115 | 0.571453 |
| DHRS13  | -0.01915 | 0.799763 | 0.859103 |
| DHRS1   | 0.44242  | 6.29E-10 | 1.42E-08 |
| DHRS2   | -0.0469  | 0.534148 | 0.637933 |
| DHRS3   | 0.440401 | 7.67E-10 | 1.69E-08 |
| DHRS4L1 | -0.24426 | 0.001017 | 0.003484 |
| DHRS4L2 | 0.014075 | 0.852075 | 0.896602 |
| DHRS4   | -0.06937 | 0.357518 | 0.470614 |
| DHRS7B  | -0.03927 | 0.602721 | 0.698907 |
| DHRS7C  | -0.09656 | 0.199774 | 0.297532 |
| DHRS7   | 0.212483 | 0.004406 | 0.012272 |
| DHRS9   | 0.519151 | 1.13E-13 | 6.61E-12 |
| DHRSX   | -0.10632 | 0.157794 | 0.246186 |
| DHTKD1  | -0.20371 | 0.006384 | 0.016857 |
| DHX15   | 0.007904 | 0.916609 | 0.942099 |
| DHX16   | 0.014927 | 0.843229 | 0.889233 |
| DHX29   | -0.19391 | 0.009499 | 0.023629 |
| DHX30   | -0.11443 | 0.128276 | 0.208219 |
| DHX32   | 0.27352  | 0.000221 | 0.000941 |
| DHX33   | -0.29067 | 8.29E-05 | 0.000403 |
| DHX34   | 0.14332  | 0.056324 | 0.106031 |
| DHX35   | -0.14724 | 0.049852 | 0.095753 |
| DHX36   | -0.21399 | 0.004129 | 0.011634 |
| DHX37   | -0.03993 | 0.596684 | 0.693842 |
| DHX38   | 0.055232 | 0.464012 | 0.574142 |
| DHX40P1 | -0.0134  | 0.859101 | 0.901896 |
| DHX40   | -0.29766 | 5.46E-05 | 0.000282 |
| DHX57   | -0.38016 | 1.66E-07 | 1.82E-06 |
| DHX58   | 0.447556 | 3.76E-10 | 9.06E-09 |
| DHX8    | 0.171621 | 0.021986 | 0.048055 |
| DHX9    | -0.12493 | 0.096599 | 0.165826 |
| DIABLO  | -0.04028 | 0.593451 | 0.690775 |
| DIAPH1  | 0.392926 | 5.79E-08 | 7.23E-07 |
| DIAPH2  | 0.170967 | 0.022504 | 0.049025 |
| DIAPH3  | 0.339198 | 3.63E-06 | 2.68E-05 |
| DICER1  | -0.36173 | 7.01E-07 | 6.40E-06 |
| DID01   | -0.13513 | 0.072106 | 0.130474 |
| DIMT1L  | -0.10645 | 0.157274 | 0.245593 |
| DI01    | -0.1461  | 0.051665 | 0.098708 |
| DI02    | 0.156864 | 0.036524 | 0.07387  |
| DI030S  | 0.43703  | 1.07E-09 | 2.24E-08 |
| DI03    | 0.222956 | 0.002777 | 0.008274 |
| DIP2A   | -0.01929 | 0.798276 | 0.858026 |
| DIP2B   | -0.20232 | 0.006762 | 0.01773  |
| DIP2C   | -0.11493 | 0.126603 | 0.206044 |
| DIRAS1  | -0.34714 | 2.06E-06 | 1.63E-05 |
| DIRAS2  | -0.15737 | 0.035919 | 0.072863 |

|           |          |          |          |
|-----------|----------|----------|----------|
| DIRAS3    | -0.15782 | 0.035388 | 0.071977 |
| DIRC1     | -0.03457 | 0.64692  | 0.736921 |
| DIRC2     | 0.059622 | 0.429204 | 0.54113  |
| DIRC3     | 0.234363 | 0.00164  | 0.005266 |
| DIS3L2    | 0.309943 | 2.55E-05 | 0.000146 |
| DIS3L     | -0.46504 | 6.16E-11 | 1.84E-09 |
| DIS3      | 0.201223 | 0.007074 | 0.018391 |
| DISC1     | 0.03206  | 0.670961 | 0.757888 |
| DISC2     | 0.189124 | 0.011461 | 0.02775  |
| DISP1     | -0.03551 | 0.637958 | 0.729484 |
| DISP2     | -0.11295 | 0.133307 | 0.214799 |
| DIXDC1    | -0.21876 | 0.00335  | 0.009694 |
| DKC1      | -0.1493  | 0.046702 | 0.090741 |
| DKFZP434F | -0.28887 | 9.21E-05 | 0.000442 |
| DKFZP434K | 0.175541 | 0.019091 | 0.042686 |
| DKFZP434I | -0.05501 | 0.465824 | 0.575988 |
| DKFZP586I | -0.31708 | 1.62E-05 | 9.83E-05 |
| DKFZP686I | -0.07736 | 0.304739 | 0.415236 |
| DKFZp434J | 0.261727 | 0.000417 | 0.001628 |
| DKFZp434I | -0.11646 | 0.121586 | 0.199274 |
| DKFZp566F | -0.08189 | 0.277182 | 0.385185 |
| DKFZp686A | -0.02716 | 0.718921 | 0.795542 |
| DKFZp686C | -0.14865 | 0.047673 | 0.09233  |
| DKFZp761E | 0.179861 | 0.016289 | 0.037393 |
| DKFZp779M | -0.21003 | 0.004894 | 0.013453 |
| DKK1      | 0.502944 | 8.41E-13 | 3.90E-11 |
| DKK2      | -0.06459 | 0.391673 | 0.504393 |
| DKK3      | 0.11067  | 0.141387 | 0.22534  |
| DKK4      | 0.336034 | 4.52E-06 | 3.26E-05 |
| DKKL1     | -0.05812 | 0.440951 | 0.552742 |
| DLAT      | -0.06266 | 0.406    | 0.518419 |
| DLC1      | -0.29368 | 6.93E-05 | 0.000346 |
| DLD       | -0.25384 | 0.000628 | 0.002306 |
| DLEC1     | 0.155445 | 0.038275 | 0.076767 |
| DLEU1     | -0.07844 | 0.29796  | 0.407995 |
| DLEU2L    | -0.03573 | 0.635876 | 0.727524 |
| DLEU2     | 0.012586 | 0.867577 | 0.908602 |
| DLEU7     | 0.192052 | 0.010223 | 0.025155 |
| DLG1      | -0.04241 | 0.574059 | 0.673716 |
| DLG2      | -0.25064 | 0.00074  | 0.002657 |
| DLG3      | 0.174235 | 0.020017 | 0.044438 |
| DLG4      | -0.33204 | 5.96E-06 | 4.16E-05 |
| DLG5      | 0.143796 | 0.055503 | 0.104765 |
| DLGAP1    | -0.30589 | 3.29E-05 | 0.000183 |
| DLGAP2    | -0.13097 | 0.081406 | 0.144318 |
| DLGAP3    | -0.30028 | 4.65E-05 | 0.000247 |
| DLGAP4    | -0.16516 | 0.027585 | 0.05832  |
| DLGAP5    | 0.407357 | 1.67E-08 | 2.44E-07 |
| DLK1      | -0.01887 | 0.802598 | 0.860938 |
| DLK2      | -0.20158 | 0.006972 | 0.018183 |
| DLL1      | -0.27428 | 0.000211 | 0.000907 |
| DLL3      | -0.29315 | 7.15E-05 | 0.000355 |
| DLL4      | -0.16674 | 0.026111 | 0.05568  |
| DLST      | 0.232095 | 0.001825 | 0.005764 |

|         |          |          |          |
|---------|----------|----------|----------|
| DLX1    | -0.09789 | 0.193622 | 0.290052 |
| DLX2    | -0.05076 | 0.501042 | 0.608201 |
| DLX3    | 0.262579 | 0.000399 | 0.001567 |
| DLX4    | 0.299523 | 4.87E-05 | 0.000257 |
| DLX5    | 0.260605 | 0.000443 | 0.001712 |
| DLX6AS  | 0.057818 | 0.443321 | 0.555036 |
| DLX6    | 0.028889 | 0.70187  | 0.782382 |
| DMAP1   | -0.11406 | 0.129511 | 0.209845 |
| DMBT1   | 0.283473 | 0.000126 | 0.000581 |
| DMBX1   | 0.506402 | 5.53E-13 | 2.75E-11 |
| DMC1    | 0.07724  | 0.305467 | 0.415713 |
| DMD     | -0.34592 | 2.25E-06 | 1.76E-05 |
| DMGDH   | -0.31759 | 1.56E-05 | 9.57E-05 |
| DMKN    | 0.307262 | 3.02E-05 | 0.00017  |
| DMP1    | -0.00039 | 0.995898 | 0.997058 |
| DMPK    | -0.03053 | 0.685771 | 0.769823 |
| DMRT1   | 0.110393 | 0.142391 | 0.226593 |
| DMRT2   | -0.23546 | 0.001556 | 0.00503  |
| DMRT3   | -0.05592 | 0.458421 | 0.56904  |
| DMRTA1  | 0.195717 | 0.008841 | 0.022207 |
| DMRTA2  | 0.122171 | 0.104255 | 0.176698 |
| DMRTB1  | -0.04507 | 0.550297 | 0.652646 |
| DMRTC1B | -0.28927 | 8.99E-05 | 0.000434 |
| DMRTC1  | -0.17721 | 0.017961 | 0.04054  |
| DMRTC2  | -0.09182 | 0.222856 | 0.324886 |
| DMTF1   | -0.12744 | 0.090036 | 0.15642  |
| DMWD    | 0.08358  | 0.267349 | 0.37496  |
| DMXL1   | -0.37518 | 2.47E-07 | 2.58E-06 |
| DMXL2   | -0.41885 | 5.93E-09 | 1.01E-07 |
| DNA2    | 0.042182 | 0.576118 | 0.675291 |
| DNAH10  | -0.28646 | 0.000106 | 0.0005   |
| DNAH11  | -0.00333 | 0.964846 | 0.976223 |
| DNAH12  | -0.15158 | 0.043414 | 0.085454 |
| DNAH14  | 0.084561 | 0.261758 | 0.368609 |
| DNAH17  | 0.124981 | 0.096467 | 0.165667 |
| DNAH1   | 0.075163 | 0.318691 | 0.430421 |
| DNAH2   | 0.360276 | 7.82E-07 | 7.03E-06 |
| DNAH3   | 0.412102 | 1.09E-08 | 1.71E-07 |
| DNAH5   | -0.11975 | 0.111367 | 0.186356 |
| DNAH6   | -0.39136 | 6.60E-08 | 8.11E-07 |
| DNAH7   | -0.33915 | 3.64E-06 | 2.69E-05 |
| DNAH8   | -0.0678  | 0.368517 | 0.482044 |
| DNAH9   | -0.2951  | 6.37E-05 | 0.000322 |
| DNAI1   | -0.33938 | 3.58E-06 | 2.66E-05 |
| DNAI2   | -0.35492 | 1.17E-06 | 9.92E-06 |
| DNAJA1  | -0.19403 | 0.009456 | 0.023537 |
| DNAJA2  | 0.181471 | 0.015341 | 0.035504 |
| DNAJA3  | 0.004147 | 0.956192 | 0.969977 |
| DNAJA4  | 0.268422 | 0.000292 | 0.001199 |
| DNAJB11 | 0.137632 | 0.066946 | 0.122517 |
| DNAJB12 | 0.016937 | 0.822448 | 0.874218 |
| DNAJB13 | 0.413712 | 9.47E-09 | 1.51E-07 |
| DNAJB14 | -0.0864  | 0.251504 | 0.357427 |
| DNAJB1  | 0.269034 | 0.000282 | 0.001164 |

|           |          |          |          |
|-----------|----------|----------|----------|
| DNAJB2    | 0.084143 | 0.264132 | 0.371396 |
| DNAJB3    | 0.353713 | 1.28E-06 | 1.07E-05 |
| DNAJB4    | -0.19895 | 0.007761 | 0.019901 |
| DNAJB5    | -0.15117 | 0.043983 | 0.086402 |
| DNAJB6    | -0.14829 | 0.048214 | 0.09313  |
| DNAJB7    | -0.02167 | 0.773983 | 0.839097 |
| DNAJB8    | 0.076854 | 0.307896 | 0.418356 |
| DNAJB9    | -0.50872 | 4.17E-13 | 2.13E-11 |
| DNAJC10   | -0.06801 | 0.367017 | 0.480622 |
| DNAJC11   | -0.0727  | 0.334849 | 0.447053 |
| DNAJC12   | -0.36978 | 3.78E-07 | 3.74E-06 |
| DNAJC13   | 0.130702 | 0.082042 | 0.145223 |
| DNAJC14   | -0.27311 | 0.000226 | 0.000959 |
| DNAJC15   | 0.264797 | 0.000354 | 0.001418 |
| DNAJC16   | -0.29094 | 8.15E-05 | 0.000398 |
| DNAJC17   | 0.377039 | 2.13E-07 | 2.27E-06 |
| DNAJC18   | -0.46689 | 5.05E-11 | 1.55E-09 |
| DNAJC19   | 0.022437 | 0.766258 | 0.833489 |
| DNAJC1    | 0.086134 | 0.252956 | 0.359    |
| DNAJC21   | -0.20682 | 0.005608 | 0.01509  |
| DNAJC22   | 0.200229 | 0.007367 | 0.019036 |
| DNAJC24   | -0.105   | 0.163065 | 0.252719 |
| DNAJC25-C | -0.20329 | 0.006498 | 0.017128 |
| DNAJC25   | -0.26847 | 0.000291 | 0.001196 |
| DNAJC27   | -0.4234  | 3.90E-09 | 7.00E-08 |
| DNAJC28   | -0.24843 | 0.000827 | 0.002923 |
| DNAJC2    | 0.15803  | 0.035137 | 0.071503 |
| DNAJC30   | -0.25484 | 0.000597 | 0.002208 |
| DNAJC3    | -0.10908 | 0.147226 | 0.232733 |
| DNAJC4    | 0.14735  | 0.049673 | 0.095455 |
| DNAJC5B   | 0.106427 | 0.157384 | 0.24565  |
| DNAJC5G   | -0.0176  | 0.815577 | 0.869573 |
| DNAJC5    | -0.37211 | 3.15E-07 | 3.19E-06 |
| DNAJC6    | -0.50487 | 6.66E-13 | 3.20E-11 |
| DNAJC7    | 0.056993 | 0.449866 | 0.560785 |
| DNAJC8    | 0.030097 | 0.690039 | 0.773166 |
| DNAJC9    | 0.165436 | 0.027323 | 0.057859 |
| DNAL1     | -0.37111 | 3.40E-07 | 3.41E-06 |
| DNAL4     | 0.057436 | 0.446346 | 0.557691 |
| DNALI1    | -0.25993 | 0.000458 | 0.001763 |
| DNASE1L1  | 0.231075 | 0.001914 | 0.006005 |
| DNASE1L2  | 0.098309 | 0.191712 | 0.287626 |
| DNASE1L3  | -0.27051 | 0.00026  | 0.001087 |
| DNASE1    | -0.29126 | 8.00E-05 | 0.000391 |
| DNASE2B   | -0.19888 | 0.007782 | 0.019944 |
| DNASE2    | 0.075618 | 0.315767 | 0.427085 |
| DND1      | 0.137006 | 0.068209 | 0.124473 |
| DNER      | -0.17895 | 0.016851 | 0.038415 |
| DNHD1     | -0.01843 | 0.807107 | 0.863342 |
| DNLZ      | 0.062225 | 0.409295 | 0.521448 |
| DNM1L     | -0.22865 | 0.002142 | 0.006624 |
| DNM1P35   | 0.118622 | 0.114788 | 0.190676 |
| DNM1      | -0.16948 | 0.023721 | 0.051335 |
| DNM2      | 0.506325 | 5.58E-13 | 2.76E-11 |

|         |          |          |          |
|---------|----------|----------|----------|
| DNM3    | -0.11039 | 0.142388 | 0.226593 |
| DNMBP   | 0.322519 | 1.13E-05 | 7.24E-05 |
| DNMT1   | -0.10157 | 0.17732  | 0.269982 |
| DNMT3A  | 0.036087 | 0.632488 | 0.724445 |
| DNMT3B  | -0.01369 | 0.856051 | 0.899644 |
| DNMT3L  | -0.02775 | 0.713084 | 0.791364 |
| DNPEP   | 0.247645 | 0.00086  | 0.00302  |
| DNTTIP1 | 0.403698 | 2.30E-08 | 3.25E-07 |
| DNTTIP2 | 0.289125 | 9.07E-05 | 0.000437 |
| DNTT    | -0.08531 | 0.257541 | 0.363882 |
| DOC2A   | 0.021923 | 0.771463 | 0.837308 |
| DOC2B   | -0.28532 | 0.000113 | 0.000531 |
| DOCK10  | -0.27781 | 0.000174 | 0.000767 |
| DOCK11  | -0.14763 | 0.049241 | 0.094809 |
| DOCK1   | -0.00728 | 0.923125 | 0.946729 |
| DOCK2   | -0.00485 | 0.948779 | 0.965307 |
| DOCK3   | -0.22111 | 0.003017 | 0.008894 |
| DOCK4   | -0.3084  | 2.81E-05 | 0.000159 |
| DOCK5   | 0.420434 | 5.13E-09 | 8.87E-08 |
| DOCK6   | 0.40776  | 1.61E-08 | 2.37E-07 |
| DOCK7   | -0.11298 | 0.133217 | 0.21469  |
| DOCK8   | -0.15478 | 0.039122 | 0.078229 |
| DOCK9   | 0.023805 | 0.75245  | 0.822632 |
| DOHH    | 0.095224 | 0.206097 | 0.305248 |
| DOK1    | 0.351437 | 1.51E-06 | 1.24E-05 |
| DOK2    | 0.041077 | 0.586163 | 0.68467  |
| DOK3    | 0.039539 | 0.600276 | 0.696956 |
| DOK4    | 0.628415 | 5.99E-21 | 2.38E-18 |
| DOK5    | 0.228235 | 0.002183 | 0.006729 |
| DOK6    | -0.11322 | 0.132383 | 0.213658 |
| DOK7    | 0.278711 | 0.000165 | 0.000734 |
| DOLK    | -0.19463 | 0.009231 | 0.023053 |
| DOLPP1  | 0.066282 | 0.379378 | 0.492084 |
| DOM3Z   | -0.19803 | 0.008055 | 0.020568 |
| DONSON  | 0.160121 | 0.032759 | 0.067413 |
| DOPEY1  | -0.42528 | 3.27E-09 | 5.98E-08 |
| DOPEY2  | -0.17454 | 0.019799 | 0.044053 |
| DOT1L   | -0.02463 | 0.74417  | 0.815699 |
| DPAGT1  | 0.064003 | 0.396011 | 0.508786 |
| DPCD    | 0.175029 | 0.01945  | 0.04336  |
| DPCR1   | 0.608007 | 2.25E-19 | 5.78E-17 |
| DPEP1   | -0.04439 | 0.556312 | 0.65769  |
| DPEP2   | 0.091975 | 0.222072 | 0.324149 |
| DPEP3   | -0.101   | 0.179775 | 0.273074 |
| DPF1    | -0.23338 | 0.001717 | 0.005478 |
| DPF2    | 0.04753  | 0.52868  | 0.633468 |
| DPF3    | -0.06747 | 0.370846 | 0.484066 |
| DPH1    | -0.42897 | 2.31E-09 | 4.39E-08 |
| DPH2    | -0.05424 | 0.472068 | 0.581963 |
| DPH3B   | -0.11255 | 0.134709 | 0.216775 |
| DPH3    | -0.22087 | 0.003049 | 0.008962 |
| DPH5    | -0.30528 | 3.42E-05 | 0.000189 |
| DPM1    | 0.076145 | 0.312396 | 0.423365 |
| DPM2    | 0.029995 | 0.691037 | 0.773688 |

|           |          |          |          |
|-----------|----------|----------|----------|
| DPM3      | -0.02889 | 0.701885 | 0.782382 |
| DPP10     | -0.27894 | 0.000163 | 0.000726 |
| DPP3      | 0.455621 | 1.65E-10 | 4.39E-09 |
| DPP4      | -0.2264  | 0.002375 | 0.00723  |
| DPP6      | -0.25434 | 0.000613 | 0.002258 |
| DPP7      | #####    | 0.999374 | 0.999425 |
| DPP8      | -0.14882 | 0.047421 | 0.09195  |
| DPP9      | 0.255666 | 0.000572 | 0.002135 |
| DPPA2     | 0.022203 | 0.768623 | 0.835143 |
| DPPA3     | 0.02818  | 0.708851 | 0.787905 |
| DPPA4     | -0.14528 | 0.053009 | 0.100798 |
| DPPA5     | 0.130369 | 0.082829 | 0.146316 |
| DPRXP4    | 0.019257 | 0.798623 | 0.858205 |
| DPRX      | -0.09919 | 0.18776  | 0.282812 |
| DPT       | -0.23632 | 0.001494 | 0.004851 |
| DPY19L1   | 0.329913 | 6.89E-06 | 4.69E-05 |
| DPY19L2P1 | -0.24702 | 0.000887 | 0.003103 |
| DPY19L2P2 | -0.21816 | 0.00344  | 0.009924 |
| DPY19L2P4 | -0.33133 | 6.25E-06 | 4.33E-05 |
| DPY19L2   | -0.15804 | 0.035126 | 0.071496 |
| DPY19L3   | -0.33456 | 5.01E-06 | 3.57E-05 |
| DPY19L4   | -0.10624 | 0.158111 | 0.246535 |
| DPY30     | 0.305291 | 3.42E-05 | 0.000189 |
| DPYD      | 0.091433 | 0.224819 | 0.327073 |
| DPYSL2    | -0.18605 | 0.012904 | 0.03068  |
| DPYSL3    | -0.00683 | 0.927939 | 0.950159 |
| DPYSL4    | -0.02988 | 0.69217  | 0.774457 |
| DPYSL5    | -0.21011 | 0.004879 | 0.013418 |
| DPYS      | -0.24876 | 0.000813 | 0.002886 |
| DQX1      | 0.311393 | 2.33E-05 | 0.000135 |
| DR1       | 0.060176 | 0.424919 | 0.537132 |
| DRAM1     | 0.153194 | 0.041198 | 0.08171  |
| DRAM2     | 0.192096 | 0.010205 | 0.025121 |
| DRAP1     | 0.276161 | 0.00019  | 0.00083  |
| DRD1      | 0.001023 | 0.989184 | 0.992195 |
| DRD2      | -0.11076 | 0.141059 | 0.224871 |
| DRD3      | -0.16723 | 0.025675 | 0.054856 |
| DRD4      | 0.325939 | 9.00E-06 | 5.92E-05 |
| DRD5      | -0.12065 | 0.108667 | 0.182688 |
| DRG1      | -0.10368 | 0.168443 | 0.259528 |
| DRG2      | -0.0833  | 0.268937 | 0.376572 |
| DRGX      | 0.041618 | 0.581233 | 0.680037 |
| DRP2      | 0.082868 | 0.271465 | 0.37936  |
| DSC1      | -0.04356 | 0.563709 | 0.664369 |
| DSC2      | 0.137666 | 0.066879 | 0.122439 |
| DSC3      | 0.113044 | 0.132996 | 0.214368 |
| DSCAML1   | -0.24079 | 0.001205 | 0.004033 |
| DSCAM     | -0.33298 | 5.59E-06 | 3.92E-05 |
| DSCC1     | 0.122066 | 0.104554 | 0.177099 |
| DSCR10    | 0.026515 | 0.725349 | 0.800975 |
| DSCR3     | 0.091126 | 0.226386 | 0.328916 |
| DSCR4     | -0.12526 | 0.09571  | 0.164489 |
| DSCR6     | 0.188355 | 0.011808 | 0.028449 |
| DSCR8     | -0.14117 | 0.060154 | 0.111825 |



|         |          |          |          |
|---------|----------|----------|----------|
| DSCR9   | -0.08728 | 0.246649 | 0.351664 |
| DSEL    | -0.12728 | 0.090457 | 0.157041 |
| DSE     | -0.08273 | 0.272247 | 0.380265 |
| DSG1    | -0.16661 | 0.026234 | 0.0559   |
| DSG2    | 0.238816 | 0.001326 | 0.004375 |
| DSG3    | 0.380983 | 1.55E-07 | 1.72E-06 |
| DSG4    | -0.07604 | 0.313076 | 0.423908 |
| DSN1    | 0.052385 | 0.487397 | 0.596176 |
| DSPP    | 0.025671 | 0.733749 | 0.80759  |
| DSP     | -0.0857  | 0.255386 | 0.361748 |
| DSTN    | -0.06826 | 0.365299 | 0.478658 |
| DSTYK   | -0.41539 | 8.14E-09 | 1.33E-07 |
| DST     | -0.18733 | 0.012286 | 0.029433 |
| DTD1    | 0.028752 | 0.703221 | 0.78354  |
| DTHD1   | -0.12078 | 0.108294 | 0.182185 |
| DTL     | 0.31792  | 1.53E-05 | 9.40E-05 |
| DTNA    | -0.4445  | 5.11E-10 | 1.19E-08 |
| DTNBP1  | -0.10674 | 0.156158 | 0.244293 |
| DTNB    | 0.029704 | 0.693875 | 0.775718 |
| DTWD1   | -0.13047 | 0.08259  | 0.146011 |
| DTWD2   | -0.09981 | 0.18498  | 0.279264 |
| DTX1    | 0.237857 | 0.001388 | 0.004556 |
| DTX2    | 0.410188 | 1.30E-08 | 1.98E-07 |
| DTX3L   | 0.256489 | 0.000548 | 0.002059 |
| DTX3    | -0.13596 | 0.070372 | 0.127862 |
| DTX4    | 0.34331  | 2.71E-06 | 2.08E-05 |
| DTYMK   | 0.360639 | 7.61E-07 | 6.88E-06 |
| DULLARD | -0.12356 | 0.100337 | 0.17104  |
| DUOX1   | 0.438086 | 9.62E-10 | 2.06E-08 |
| DUOX2   | 0.363747 | 6.01E-07 | 5.58E-06 |
| DUOXA1  | 0.467553 | 4.71E-11 | 1.46E-09 |
| DUOXA2  | 0.365274 | 5.35E-07 | 5.05E-06 |
| DUPD1   | -0.10313 | 0.170738 | 0.262269 |
| DUS1L   | 0.091188 | 0.226065 | 0.328571 |
| DUS2L   | 0.259972 | 0.000458 | 0.00176  |
| DUS3L   | 0.021705 | 0.773669 | 0.838965 |
| DUS4L   | 0.026053 | 0.729939 | 0.804487 |
| DUSP10  | 0.312501 | 2.17E-05 | 0.000127 |
| DUSP11  | 0.229904 | 0.002021 | 0.006291 |
| DUSP12  | 0.020344 | 0.787514 | 0.849322 |
| DUSP13  | -0.00959 | 0.898955 | 0.92946  |
| DUSP14  | 0.158323 | 0.034795 | 0.070909 |
| DUSP15  | -0.19351 | 0.00965  | 0.02396  |
| DUSP16  | -0.34313 | 2.75E-06 | 2.10E-05 |
| DUSP18  | -0.02657 | 0.72484  | 0.800636 |
| DUSP19  | -0.28852 | 9.40E-05 | 0.00045  |
| DUSP1   | -0.0618  | 0.412501 | 0.524486 |
| DUSP21  | -0.00307 | 0.967607 | 0.977943 |
| DUSP22  | 0.031261 | 0.678701 | 0.763725 |
| DUSP23  | 0.338472 | 3.82E-06 | 2.80E-05 |
| DUSP26  | -0.22154 | 0.002959 | 0.008746 |
| DUSP27  | 0.096306 | 0.200965 | 0.299049 |
| DUSP28  | -0.01338 | 0.859272 | 0.902003 |
| DUSP2   | 0.059115 | 0.433144 | 0.544812 |

|          |          |          |          |
|----------|----------|----------|----------|
| DUSP3    | 0.022237 | 0.768282 | 0.834955 |
| DUSP4    | 0.318186 | 1.50E-05 | 9.26E-05 |
| DUSP5P   | 0.29924  | 4.96E-05 | 0.00026  |
| DUSP5    | 0.123979 | 0.099189 | 0.169407 |
| DUSP6    | 0.245518 | 0.000956 | 0.003303 |
| DUSP7    | 0.41037  | 1.28E-08 | 1.95E-07 |
| DUSP8    | -0.2417  | 0.001153 | 0.003884 |
| DUSP9    | 0.026392 | 0.726567 | 0.802028 |
| DUT      | 0.034449 | 0.648025 | 0.737736 |
| DUXA     | -0.09882 | 0.189417 | 0.284875 |
| DVL1     | 0.351472 | 1.51E-06 | 1.24E-05 |
| DVL2     | -0.40004 | 3.16E-08 | 4.24E-07 |
| DVL3     | 0.019076 | 0.80047  | 0.859591 |
| DVWA     | 0.23166  | 0.001862 | 0.005867 |
| DYDC1    | -0.07902 | 0.2944   | 0.404325 |
| DYDC2    | 0.075017 | 0.319637 | 0.431346 |
| DYM      | -0.29492 | 6.43E-05 | 0.000325 |
| DYNC1H1  | -0.20529 | 0.005979 | 0.015935 |
| DYNC1I1  | -0.21905 | 0.003308 | 0.00959  |
| DYNC1I2  | 0.219803 | 0.003198 | 0.009328 |
| DYNC1LI1 | -0.12847 | 0.087448 | 0.152898 |
| DYNC1LI2 | 0.016808 | 0.823777 | 0.875114 |
| DYNC2H1  | 0.07017  | 0.351988 | 0.464788 |
| DYNC2LI1 | -0.06792 | 0.367668 | 0.481241 |
| DYNLL1   | 0.121663 | 0.105713 | 0.178688 |
| DYNLL2   | -0.30094 | 4.47E-05 | 0.000238 |
| DYNLRB1  | 0.169856 | 0.023409 | 0.050744 |
| DYNLRB2  | -0.22518 | 0.002511 | 0.007591 |
| DYNLT1   | 0.307592 | 2.96E-05 | 0.000167 |
| DYNLT3   | 0.072806 | 0.33415  | 0.446421 |
| DYRK1A   | -0.18375 | 0.014079 | 0.033005 |
| DYRK1B   | -0.09709 | 0.1973   | 0.294469 |
| DYRK2    | -0.18548 | 0.013184 | 0.031258 |
| DYRK3    | -0.33394 | 5.23E-06 | 3.70E-05 |
| DYRK4    | -0.18612 | 0.012865 | 0.030616 |
| DYSFIP1  | 0.070796 | 0.347702 | 0.460205 |
| DYSF     | -0.0473  | 0.530656 | 0.634951 |
| DYTN     | -0.17383 | 0.02031  | 0.044994 |
| DYX1C1   | -0.01093 | 0.884822 | 0.919946 |
| DZIP1L   | 0.126889 | 0.091447 | 0.158453 |
| DZIP1    | -0.079   | 0.294551 | 0.404476 |
| DZIP3    | -0.42282 | 4.12E-09 | 7.34E-08 |
| E2F1     | 0.266297 | 0.000327 | 0.00132  |
| E2F2     | 0.152961 | 0.041511 | 0.08224  |
| E2F3     | 0.126556 | 0.092309 | 0.159709 |
| E2F4     | 0.146002 | 0.051821 | 0.09894  |
| E2F5     | -0.26798 | 0.000299 | 0.001224 |
| E2F6     | -0.27938 | 0.000159 | 0.000711 |
| E2F7     | 0.347617 | 1.99E-06 | 1.58E-05 |
| E2F8     | 0.368241 | 4.25E-07 | 4.13E-06 |
| E4F1     | 0.132029 | 0.078956 | 0.140605 |
| EAF1     | -0.22285 | 0.00279  | 0.008303 |
| EAF2     | -0.0263  | 0.727508 | 0.802681 |
| EAPP     | -0.04276 | 0.570906 | 0.670812 |

|          |          |          |          |
|----------|----------|----------|----------|
| EARS2    | 0.059344 | 0.431363 | 0.543264 |
| EBAG9    | -0.16468 | 0.028047 | 0.059144 |
| EBF1     | -0.30133 | 4.36E-05 | 0.000234 |
| EBF2     | -0.15034 | 0.045172 | 0.08836  |
| EBF3     | -0.15726 | 0.036048 | 0.073065 |
| EBF4     | -0.07101 | 0.346267 | 0.458674 |
| EBI3     | -0.09591 | 0.202835 | 0.301432 |
| EBNA1BP2 | 0.086545 | 0.250688 | 0.356396 |
| EBPL     | 0.272877 | 0.000229 | 0.00097  |
| EBP      | 0.371539 | 3.29E-07 | 3.31E-06 |
| ECD      | 0.170904 | 0.022555 | 0.049125 |
| ECE1     | -0.02226 | 0.768001 | 0.834787 |
| ECE2     | -0.26035 | 0.000449 | 0.001732 |
| ECEL1    | -0.02077 | 0.783142 | 0.846082 |
| ECH1     | 0.265104 | 0.000349 | 0.001397 |
| ECHDC1   | -0.1133  | 0.132106 | 0.213294 |
| ECHDC2   | 0.110746 | 0.141113 | 0.224921 |
| ECHDC3   | -0.17182 | 0.021832 | 0.047761 |
| ECHS1    | 0.19948  | 0.007596 | 0.019544 |
| ECM1     | 0.539675 | 7.66E-15 | 5.80E-13 |
| ECM2     | -0.04492 | 0.551622 | 0.653825 |
| ECSCR    | -0.13925 | 0.063773 | 0.117568 |
| ECSIT    | 0.001137 | 0.987979 | 0.991388 |
| ECT2L    | -0.25342 | 0.000642 | 0.002348 |
| ECT2     | 0.362573 | 6.57E-07 | 6.06E-06 |
| EDA2R    | -0.25836 | 0.000498 | 0.001895 |
| EDARADD  | -0.20581 | 0.00585  | 0.015648 |
| EDAR     | 0.315942 | 1.74E-05 | 0.000105 |
| EDA      | -0.37434 | 2.64E-07 | 2.73E-06 |
| EDC3     | -0.12785 | 0.088999 | 0.155027 |
| EDC4     | 0.024873 | 0.74173  | 0.813747 |
| EDDM3A   | -0.11905 | 0.113479 | 0.188995 |
| EDDM3B   | 0.0003   | 0.99683  | 0.997537 |
| EDEM1    | -0.1024  | 0.173779 | 0.266009 |
| EDEM2    | 0.057008 | 0.449746 | 0.560736 |
| EDEM3    | -0.09881 | 0.189457 | 0.284913 |
| EDF1     | 0.037122 | 0.622755 | 0.716648 |
| EDIL3    | -0.03443 | 0.648248 | 0.737784 |
| EDN1     | 0.239603 | 0.001276 | 0.004242 |
| EDN2     | 0.209699 | 0.004965 | 0.013615 |
| EDN3     | -0.0795  | 0.291489 | 0.401107 |
| EDNRA    | 0.234821 | 0.001605 | 0.005163 |
| EDNRB    | -0.35346 | 1.30E-06 | 1.09E-05 |
| EEA1     | -0.31694 | 1.63E-05 | 9.91E-05 |
| EED      | 0.243269 | 0.001068 | 0.00363  |
| EEF1A1P9 | -0.16954 | 0.023673 | 0.051255 |
| EEF1A1   | -0.16263 | 0.030087 | 0.062822 |
| EEF1A2   | -0.08515 | 0.258435 | 0.364916 |
| EEF1B2   | 0.076388 | 0.310847 | 0.421497 |
| EEF1DP3  | 0.083054 | 0.270384 | 0.37817  |
| EEF1D    | 0.166113 | 0.02669  | 0.056743 |
| EEF1E1   | -0.12631 | 0.092954 | 0.160596 |
| EEF1G    | 0.092667 | 0.218598 | 0.320141 |
| EEF2K    | 0.072668 | 0.335068 | 0.447195 |

|         |          |          |          |
|---------|----------|----------|----------|
| EEF2    | -0.27749 | 0.000177 | 0.000778 |
| EEFSEC  | 0.120314 | 0.109666 | 0.184071 |
| EEPD1   | 0.301431 | 4.34E-05 | 0.000233 |
| EFCAB10 | -0.1783  | 0.017255 | 0.039197 |
| EFCAB1  | 0.229544 | 0.002055 | 0.006378 |
| EFCAB2  | -0.22453 | 0.002586 | 0.007781 |
| EFCAB3  | -0.04113 | 0.585655 | 0.684206 |
| EFCAB4A | 0.295448 | 6.23E-05 | 0.000316 |
| EFCAB4B | -0.18774 | 0.012091 | 0.02906  |
| EFCAB5  | -0.19336 | 0.00971  | 0.024081 |
| EFCAB6  | -0.36433 | 5.75E-07 | 5.37E-06 |
| EFCAB7  | -0.22118 | 0.003008 | 0.008871 |
| EFEMP1  | 0.000588 | 0.993788 | 0.995701 |
| EFEMP2  | 0.223424 | 0.002719 | 0.008123 |
| EFHA1   | 0.04866  | 0.51892  | 0.624612 |
| EFHA2   | -0.27643 | 0.000188 | 0.000819 |
| EFHB    | -0.17521 | 0.019319 | 0.043117 |
| EFHC1   | -0.33943 | 3.57E-06 | 2.65E-05 |
| EFHC2   | -0.11685 | 0.120358 | 0.197852 |
| EFHD1   | 0.004476 | 0.952718 | 0.967792 |
| EFHD2   | 0.440244 | 7.79E-10 | 1.71E-08 |
| EFNA1   | 0.30019  | 4.68E-05 | 0.000248 |
| EFNA2   | 0.318597 | 1.46E-05 | 9.04E-05 |
| EFNA3   | 0.442067 | 6.51E-10 | 1.46E-08 |
| EFNA4   | 0.558963 | 5.12E-16 | 5.06E-14 |
| EFNA5   | 0.368519 | 4.16E-07 | 4.06E-06 |
| EFNB1   | 0.669437 | 1.70E-24 | 1.87E-21 |
| EFNB2   | 0.496317 | 1.85E-12 | 8.14E-11 |
| EFNB3   | -0.34064 | 3.28E-06 | 2.46E-05 |
| EFR3A   | -0.02781 | 0.712543 | 0.790897 |
| EFR3B   | -0.37889 | 1.84E-07 | 1.99E-06 |
| EFS     | 0.168977 | 0.024146 | 0.052059 |
| EFTUD1  | -0.00256 | 0.972964 | 0.981702 |
| EFTUD2  | 0.265935 | 0.000333 | 0.001342 |
| EGFL6   | 0.180489 | 0.015914 | 0.036641 |
| EGFL7   | -0.13347 | 0.075703 | 0.135827 |
| EGFL8   | 0.116691 | 0.120857 | 0.198391 |
| EGFLAM  | -0.12485 | 0.096823 | 0.166167 |
| EGFR    | 0.104544 | 0.1649   | 0.255103 |
| EGF     | 0.062601 | 0.406464 | 0.518844 |
| EGLN1   | -0.12846 | 0.087468 | 0.152912 |
| EGLN2   | 0.130419 | 0.082711 | 0.146159 |
| EGLN3   | 0.273463 | 0.000221 | 0.000943 |
| EGOT    | 0.36849  | 4.17E-07 | 4.06E-06 |
| EGR1    | -0.04328 | 0.566192 | 0.666645 |
| EGR2    | 0.081094 | 0.281889 | 0.390505 |
| EGR3    | -0.12711 | 0.090876 | 0.15763  |
| EGR4    | 0.035018 | 0.642612 | 0.733499 |
| EHBP1L1 | 0.495528 | 2.03E-12 | 8.79E-11 |
| EHBP1   | 0.086905 | 0.248718 | 0.354154 |
| EHD1    | 0.524801 | 5.50E-14 | 3.46E-12 |
| EHD2    | 0.511242 | 3.05E-13 | 1.63E-11 |
| EHD3    | -0.142   | 0.058654 | 0.109531 |
| EHD4    | 0.400519 | 3.03E-08 | 4.10E-07 |

|          |          |          |          |
|----------|----------|----------|----------|
| EHF      | 0.109758 | 0.144718 | 0.229484 |
| EHHADH   | 0.036545 | 0.628175 | 0.721009 |
| EHMT1    | -0.08217 | 0.275533 | 0.383474 |
| EHMT2    | 0.044016 | 0.559632 | 0.660627 |
| EI24     | 0.231489 | 0.001877 | 0.005905 |
| EID1     | -0.35732 | 9.77E-07 | 8.50E-06 |
| EID2B    | -0.27588 | 0.000194 | 0.000841 |
| EID2     | -0.20185 | 0.006894 | 0.01802  |
| EID3     | -0.38802 | 8.72E-08 | 1.04E-06 |
| EIF1AD   | 0.328603 | 7.53E-06 | 5.07E-05 |
| EIF1AX   | -0.0403  | 0.59326  | 0.690594 |
| EIF1AY   | -0.06861 | 0.362802 | 0.47608  |
| EIF1B    | -0.19528 | 0.008997 | 0.02253  |
| EIF1     | -0.07787 | 0.301542 | 0.411668 |
| EIF2AK1  | 0.03786  | 0.615852 | 0.710701 |
| EIF2AK2  | 0.28053  | 0.000149 | 0.000672 |
| EIF2AK3  | -0.3942  | 5.20E-08 | 6.60E-07 |
| EIF2AK4  | -0.09189 | 0.222521 | 0.324573 |
| EIF2A    | 0.062371 | 0.408194 | 0.520415 |
| EIF2B1   | -0.02997 | 0.691284 | 0.773859 |
| EIF2B2   | 0.18023  | 0.016068 | 0.036941 |
| EIF2B3   | -0.11673 | 0.120716 | 0.198259 |
| EIF2B4   | 0.117208 | 0.119209 | 0.196436 |
| EIF2B5   | 0.153623 | 0.040628 | 0.080749 |
| EIF2C1   | -0.36329 | 6.23E-07 | 5.76E-06 |
| EIF2C2   | 0.078014 | 0.300633 | 0.410745 |
| EIF2C3   | -0.26642 | 0.000325 | 0.001312 |
| EIF2C4   | -0.12297 | 0.101985 | 0.173446 |
| EIF2S1   | 0.169817 | 0.023441 | 0.050803 |
| EIF2S2   | 0.142947 | 0.056975 | 0.106963 |
| EIF2S3   | 0.225443 | 0.002481 | 0.007508 |
| EIF3A    | -0.21475 | 0.003995 | 0.011311 |
| EIF3B    | 0.097551 | 0.195179 | 0.291941 |
| EIF3CL   | 0.126659 | 0.092041 | 0.159343 |
| EIF3C    | 0.042167 | 0.576253 | 0.675409 |
| EIF3D    | 0.063    | 0.403474 | 0.516127 |
| EIF3E    | 0.006182 | 0.934726 | 0.955208 |
| EIF3F    | 0.127442 | 0.090033 | 0.15642  |
| EIF3G    | 0.147041 | 0.050158 | 0.096228 |
| EIF3H    | 0.171517 | 0.022069 | 0.048198 |
| EIF3IP1  | 0.003948 | 0.95829  | 0.971506 |
| EIF3I    | 0.229189 | 0.002089 | 0.006476 |
| EIF3J    | 0.084816 | 0.260316 | 0.366969 |
| EIF3K    | 0.121282 | 0.106819 | 0.180271 |
| EIF3L    | -0.30042 | 4.61E-05 | 0.000245 |
| EIF3M    | 0.347035 | 2.08E-06 | 1.64E-05 |
| EIF4A1   | -0.04321 | 0.566869 | 0.66694  |
| EIF4A2   | 0.072002 | 0.339527 | 0.451804 |
| EIF4A3   | 0.023665 | 0.753862 | 0.823766 |
| EIF4B    | -0.39017 | 7.29E-08 | 8.85E-07 |
| EIF4E1B  | -0.13105 | 0.081214 | 0.144017 |
| EIF4E2   | 0.436985 | 1.07E-09 | 2.24E-08 |
| EIF4E3   | -0.21836 | 0.003409 | 0.009846 |
| EIF4EBP1 | 0.156572 | 0.036879 | 0.074475 |

|           |          |          |          |
|-----------|----------|----------|----------|
| EIF4EBP2  | 0.00031  | 0.996724 | 0.997537 |
| EIF4EBP3  | 0.457396 | 1.38E-10 | 3.73E-09 |
| EIF4ENIF1 | -0.27273 | 0.00023  | 0.000976 |
| EIF4E     | -0.14614 | 0.051602 | 0.098615 |
| EIF4G1    | 0.079073 | 0.294098 | 0.404022 |
| EIF4G2    | -0.19305 | 0.009828 | 0.024328 |
| EIF4G3    | -0.13578 | 0.070733 | 0.128363 |
| EIF4H     | -0.09679 | 0.198719 | 0.296273 |
| EIF5A2    | 0.255902 | 0.000565 | 0.002112 |
| EIF5AL1   | -0.02057 | 0.785182 | 0.847731 |
| EIF5A     | 0.017221 | 0.819531 | 0.87224  |
| EIF5B     | 0.028412 | 0.706573 | 0.786368 |
| EIF5      | -0.30544 | 3.39E-05 | 0.000187 |
| EIF6      | 0.432748 | 1.61E-09 | 3.20E-08 |
| ELAC1     | -0.43766 | 1.00E-09 | 2.13E-08 |
| ELAC2     | -0.26286 | 0.000393 | 0.001546 |
| ELANE     | -0.08761 | 0.244882 | 0.34975  |
| ELAVL1    | -0.09505 | 0.206936 | 0.306238 |
| ELAVL2    | -0.1368  | 0.068631 | 0.125141 |
| ELAVL3    | -0.21185 | 0.004528 | 0.012577 |
| ELAVL4    | -0.351   | 1.56E-06 | 1.28E-05 |
| ELF1      | 0.054745 | 0.467972 | 0.578102 |
| ELF2      | -0.32957 | 7.05E-06 | 4.78E-05 |
| ELF3      | 0.475728 | 1.94E-11 | 6.45E-10 |
| ELF4      | 0.297712 | 5.44E-05 | 0.000282 |
| ELF5      | 0.073049 | 0.332531 | 0.444755 |
| ELFN1     | -0.16276 | 0.029952 | 0.062582 |
| ELFN2     | 0.043485 | 0.564385 | 0.665007 |
| ELK1      | 0.031697 | 0.674477 | 0.760686 |
| ELK3      | -0.00168 | 0.982224 | 0.987668 |
| ELK4      | -0.00373 | 0.960602 | 0.973083 |
| ELL2      | -0.49784 | 1.55E-12 | 6.89E-11 |
| ELL3      | 0.228381 | 0.002168 | 0.006694 |
| ELL       | -0.0273  | 0.717532 | 0.794828 |
| ELM01     | -0.5102  | 3.47E-13 | 1.81E-11 |
| ELM02     | -0.56798 | 1.36E-16 | 1.62E-14 |
| ELM03     | 0.493432 | 2.60E-12 | 1.10E-10 |
| ELMOD1    | -0.09342 | 0.214881 | 0.315751 |
| ELMOD2    | -0.09564 | 0.204099 | 0.302923 |
| ELMOD3    | 0.047797 | 0.526367 | 0.63173  |
| ELN       | 0.102934 | 0.171539 | 0.263212 |
| ELOF1     | 0.087723 | 0.244271 | 0.349041 |
| ELOVL1    | 0.479292 | 1.30E-11 | 4.50E-10 |
| ELOVL2    | -0.39065 | 7.01E-08 | 8.54E-07 |
| ELOVL3    | 0.084122 | 0.264249 | 0.371534 |
| ELOVL4    | -0.35175 | 1.47E-06 | 1.21E-05 |
| ELOVL5    | -0.29781 | 5.41E-05 | 0.00028  |
| ELOVL6    | 0.28967  | 8.79E-05 | 0.000425 |
| ELOVL7    | 0.050973 | 0.499226 | 0.606519 |
| ELP2P     | -0.31731 | 1.59E-05 | 9.72E-05 |
| ELP2      | -0.30876 | 2.75E-05 | 0.000156 |
| ELP3      | -0.08167 | 0.278448 | 0.38666  |
| ELP4      | -0.17338 | 0.020647 | 0.045621 |
| ELSPBP1   | 0.055584 | 0.461168 | 0.571482 |

|         |          |          |          |
|---------|----------|----------|----------|
| ELTD1   | -0.21539 | 0.003884 | 0.011036 |
| EMB     | 0.220838 | 0.003054 | 0.008969 |
| EMCN    | -0.23055 | 0.001961 | 0.006132 |
| EMD     | -0.03157 | 0.675718 | 0.761782 |
| EME1    | 0.266974 | 0.000315 | 0.001281 |
| EME2    | 0.045579 | 0.545754 | 0.648483 |
| EMG1    | 0.119613 | 0.111765 | 0.186877 |
| EMID1   | -0.17638 | 0.018517 | 0.04157  |
| EMID2   | -0.14745 | 0.04951  | 0.095225 |
| EMILIN1 | 0.184864 | 0.013498 | 0.031893 |
| EMILIN2 | -0.02286 | 0.762006 | 0.830279 |
| EMILIN3 | -0.01529 | 0.839458 | 0.886675 |
| EML1    | -0.42318 | 3.98E-09 | 7.13E-08 |
| EML2    | 0.392608 | 5.95E-08 | 7.41E-07 |
| EML3    | 0.262902 | 0.000392 | 0.001543 |
| EML4    | 0.127021 | 0.091109 | 0.157978 |
| EML5    | -0.47442 | 2.24E-11 | 7.34E-10 |
| EML6    | -0.40685 | 1.75E-08 | 2.54E-07 |
| EMP1    | 0.220691 | 0.003074 | 0.009019 |
| EMP2    | 0.303523 | 3.81E-05 | 0.000207 |
| EMP3    | 0.42192  | 4.47E-09 | 7.87E-08 |
| EMR1    | -0.14736 | 0.049663 | 0.095451 |
| EMR2    | -0.10297 | 0.17137  | 0.263014 |
| EMR3    | 0.036552 | 0.628107 | 0.720972 |
| EMR4P   | -0.02961 | 0.694815 | 0.776493 |
| EMX1    | 0.146565 | 0.050915 | 0.097466 |
| EMX2OS  | 0.074759 | 0.321306 | 0.433154 |
| EMX2    | 0.131682 | 0.079753 | 0.141845 |
| EN1     | 0.163526 | 0.029181 | 0.06117  |
| EN2     | 0.182374 | 0.01483  | 0.0345   |
| ENAH    | -0.05431 | 0.471504 | 0.581557 |
| ENAM    | -0.21436 | 0.004063 | 0.011483 |
| ENC1    | 0.314397 | 1.92E-05 | 0.000114 |
| ENDOD1  | 0.439041 | 8.76E-10 | 1.90E-08 |
| ENDOG   | 0.049878 | 0.508502 | 0.615149 |
| ENDOU   | 0.070977 | 0.346464 | 0.458874 |
| ENGASE  | 0.162763 | 0.029952 | 0.062582 |
| ENG     | -0.06736 | 0.371626 | 0.484683 |
| ENHO    | -0.30085 | 4.49E-05 | 0.000239 |
| ENKUR   | -0.00187 | 0.980255 | 0.986291 |
| ENO1    | 0.299531 | 4.87E-05 | 0.000257 |
| ENO2    | 0.013093 | 0.86229  | 0.904367 |
| ENO3    | 0.041715 | 0.580357 | 0.679293 |
| ENOPH1  | -0.13039 | 0.082774 | 0.146245 |
| ENOSF1  | -0.02124 | 0.778431 | 0.842679 |
| ENOX1   | -0.14721 | 0.049895 | 0.095825 |
| ENOX2   | -0.38822 | 8.58E-08 | 1.02E-06 |
| ENPEP   | -0.13601 | 0.070258 | 0.12768  |
| ENPP1   | -0.21592 | 0.003796 | 0.010817 |
| ENPP2   | -0.38292 | 1.33E-07 | 1.49E-06 |
| ENPP3   | -0.26001 | 0.000457 | 0.001758 |
| ENPP4   | -0.28893 | 9.18E-05 | 0.000441 |
| ENPP5   | -0.20127 | 0.007061 | 0.018366 |
| ENPP6   | -0.08054 | 0.285221 | 0.394182 |

|          |          |          |          |
|----------|----------|----------|----------|
| ENPP7    | -0.07115 | 0.345313 | 0.457656 |
| ENSA     | 0.014902 | 0.843494 | 0.889465 |
| ENTHD1   | 0.211673 | 0.004563 | 0.012663 |
| ENTPD1   | -0.0161  | 0.831076 | 0.880266 |
| ENTPD2   | 0.296129 | 5.98E-05 | 0.000306 |
| ENTPD3   | 0.010506 | 0.889308 | 0.923124 |
| ENTPD4   | -0.11201 | 0.136605 | 0.219202 |
| ENTPD5   | 0.038852 | 0.606628 | 0.702516 |
| ENTPD6   | 0.040039 | 0.595674 | 0.692956 |
| ENTPD7   | -0.11036 | 0.142526 | 0.22677  |
| ENTPD8   | 0.232508 | 0.00179  | 0.005669 |
| ENY2     | 0.152883 | 0.041617 | 0.082424 |
| EOMES    | -0.17404 | 0.020157 | 0.044714 |
| EP300    | -0.18793 | 0.012003 | 0.028882 |
| EP400NL  | -0.00594 | 0.937289 | 0.95748  |
| EP400    | -0.38221 | 1.41E-07 | 1.57E-06 |
| EPAS1    | -0.40106 | 2.89E-08 | 3.93E-07 |
| EPB41L1  | 0.567232 | 1.52E-16 | 1.79E-14 |
| EPB41L2  | -0.22352 | 0.002707 | 0.008094 |
| EPB41L3  | -0.41344 | 9.70E-09 | 1.54E-07 |
| EPB41L4A | 0.056281 | 0.455555 | 0.566515 |
| EPB41L4B | -0.25332 | 0.000645 | 0.002357 |
| EPB41L5  | -0.42246 | 4.25E-09 | 7.53E-08 |
| EPB41    | -0.1291  | 0.085881 | 0.150631 |
| EPB42    | -0.19332 | 0.009723 | 0.024108 |
| EPB49    | 0.048199 | 0.522893 | 0.628476 |
| EPC1     | -0.29611 | 5.99E-05 | 0.000306 |
| EPC2     | -0.37405 | 2.70E-07 | 2.79E-06 |
| EPCAM    | 0.236882 | 0.001455 | 0.004744 |
| EPDR1    | 0.283586 | 0.000125 | 0.000578 |
| EPGN     | 0.114011 | 0.12969  | 0.210031 |
| EPHA10   | -0.04641 | 0.538447 | 0.641748 |
| EPHA1    | 0.435896 | 1.19E-09 | 2.45E-08 |
| EPHA2    | 0.676437 | 3.70E-25 | 4.30E-22 |
| EPHA3    | -0.05405 | 0.473647 | 0.583436 |
| EPHA4    | 0.177477 | 0.017788 | 0.040231 |
| EPHA5    | -0.29466 | 6.53E-05 | 0.000329 |
| EPHA6    | -0.05442 | 0.470604 | 0.5807   |
| EPHA7    | -0.05599 | 0.457858 | 0.568735 |
| EPHA8    | 0.012679 | 0.866607 | 0.907642 |
| EPHB1    | -0.18419 | 0.01385  | 0.032561 |
| EPHB2    | 0.110571 | 0.141746 | 0.225767 |
| EPHB3    | 0.171347 | 0.022202 | 0.048452 |
| EPHB4    | 0.418656 | 6.04E-09 | 1.02E-07 |
| EPHB6    | 0.233442 | 0.001713 | 0.005464 |
| EPHX1    | -0.0842  | 0.263832 | 0.371106 |
| EPHX2    | -0.34338 | 2.70E-06 | 2.07E-05 |
| EPHX3    | 0.224364 | 0.002606 | 0.007832 |
| EPHX4    | 0.582138 | 1.56E-17 | 2.37E-15 |
| EPM2AIP1 | -0.28737 | 0.000101 | 0.000477 |
| EPM2A    | -0.44222 | 6.41E-10 | 1.45E-08 |
| EPN1     | 0.276743 | 0.000184 | 0.000807 |
| EPN2     | -0.06914 | 0.35914  | 0.472183 |
| EPN3     | 0.404304 | 2.18E-08 | 3.10E-07 |



|         |          |          |          |
|---------|----------|----------|----------|
| EPOR    | -0.0973  | 0.196327 | 0.293282 |
| EPO     | -0.1134  | 0.131762 | 0.2129   |
| EPPK1   | 0.316627 | 1.66E-05 | 0.000101 |
| EPR1    | 0.306055 | 3.26E-05 | 0.000181 |
| EPRS    | -0.15428 | 0.039762 | 0.0793   |
| EPS15L1 | 0.055962 | 0.458115 | 0.568875 |
| EPS15   | -0.09464 | 0.208885 | 0.308583 |
| EPS8L1  | 0.648534 | 1.28E-22 | 8.70E-20 |
| EPS8L2  | 0.444648 | 5.04E-10 | 1.18E-08 |
| EPS8L3  | 0.478872 | 1.37E-11 | 4.68E-10 |
| EPS8    | 0.339715 | 3.50E-06 | 2.60E-05 |
| EPSTI1  | 0.43033  | 2.03E-09 | 3.91E-08 |
| EPT1    | -0.2293  | 0.002078 | 0.006444 |
| EPX     | -0.23997 | 0.001254 | 0.00418  |
| EPYC    | 0.230317 | 0.001982 | 0.006189 |
| ERAL1   | 0.122643 | 0.102911 | 0.17475  |
| ERAP1   | -0.07033 | 0.350864 | 0.463478 |
| ERAP2   | 0.091023 | 0.226913 | 0.329488 |
| ERAS    | -0.16462 | 0.028099 | 0.059224 |
| ERBB2IP | 0.187559 | 0.012176 | 0.029216 |
| ERBB2   | 0.558135 | 5.77E-16 | 5.62E-14 |
| ERBB3   | 0.31666  | 1.66E-05 | 0.000101 |
| ERBB4   | -0.29733 | 5.57E-05 | 0.000287 |
| ERC1    | -0.4178  | 6.53E-09 | 1.09E-07 |
| ERC2    | -0.17044 | 0.02293  | 0.049815 |
| ERCC1   | 0.213892 | 0.004146 | 0.011672 |
| ERCC2   | 0.241878 | 0.001143 | 0.003856 |
| ERCC3   | 0.044756 | 0.553037 | 0.654875 |
| ERCC4   | -0.41041 | 1.27E-08 | 1.94E-07 |
| ERCC5   | 0.348993 | 1.80E-06 | 1.45E-05 |
| ERCC6L  | 0.289587 | 8.83E-05 | 0.000427 |
| ERCC6   | -0.17942 | 0.016555 | 0.037884 |
| ERCC8   | -0.17582 | 0.018896 | 0.042339 |
| EREG    | 0.489688 | 4.01E-12 | 1.61E-10 |
| ERF     | 0.175822 | 0.018898 | 0.042339 |
| ERGIC1  | 0.151616 | 0.043357 | 0.085359 |
| ERGIC2  | 0.025486 | 0.735596 | 0.808902 |
| ERGIC3  | 0.047554 | 0.528474 | 0.633342 |
| ERG     | -0.24857 | 0.000821 | 0.002906 |
| ERH     | 0.067837 | 0.368269 | 0.481783 |
| ERI1    | 0.154073 | 0.040035 | 0.079748 |
| ERI2    | 0.117122 | 0.119479 | 0.196777 |
| ERI3    | -0.10012 | 0.183617 | 0.277609 |
| ERICH1  | 0.290568 | 8.33E-05 | 0.000405 |
| ERLEC1  | -0.34187 | 3.01E-06 | 2.27E-05 |
| ERLIN1  | 0.167051 | 0.025832 | 0.055145 |
| ERLIN2  | 0.018571 | 0.805651 | 0.86239  |
| ERMAP   | -0.30603 | 3.26E-05 | 0.000181 |
| ERMN    | 0.135752 | 0.070798 | 0.128449 |
| ERMP1   | -0.04456 | 0.554775 | 0.656383 |
| ERN1    | -0.37373 | 2.77E-07 | 2.84E-06 |
| ERN2    | 0.531398 | 2.32E-14 | 1.59E-12 |
| ERO1LB  | -0.32699 | 8.39E-06 | 5.56E-05 |
| ERO1L   | 0.330353 | 6.68E-06 | 4.58E-05 |

|          |          |          |          |
|----------|----------|----------|----------|
| ERP27    | 0.006873 | 0.927451 | 0.949885 |
| ERP29    | -0.31343 | 2.04E-05 | 0.000121 |
| ERP44    | -0.13847 | 0.06528  | 0.119935 |
| ERRFI1   | 0.046609 | 0.536713 | 0.640145 |
| ERVFRDE1 | -0.14599 | 0.051848 | 0.098971 |
| ESAM     | 0.020313 | 0.787835 | 0.849482 |
| ESCO1    | 0.068755 | 0.361807 | 0.474995 |
| ESCO2    | 0.361527 | 7.12E-07 | 6.49E-06 |
| ESD      | 0.168017 | 0.024975 | 0.053598 |
| ESF1     | -0.21773 | 0.003505 | 0.010085 |
| ESM1     | 0.093588 | 0.214033 | 0.314739 |
| ESPL1    | 0.293375 | 7.06E-05 | 0.000351 |
| ESPNL    | 0.085394 | 0.25707  | 0.363453 |
| ESPNP    | 0.266971 | 0.000315 | 0.001281 |
| ESPN     | 0.400554 | 3.02E-08 | 4.09E-07 |
| ESR1     | -0.19794 | 0.008086 | 0.020632 |
| ESR2     | -0.13028 | 0.083048 | 0.146612 |
| ESRP1    | 0.282879 | 0.00013  | 0.000599 |
| ESRP2    | 0.368335 | 4.22E-07 | 4.10E-06 |
| ESRRA    | 0.39385  | 5.36E-08 | 6.76E-07 |
| ESRRB    | -0.24522 | 0.00097  | 0.003346 |
| ESRRG    | -0.16917 | 0.02398  | 0.051779 |
| ESX1     | -0.08282 | 0.271715 | 0.379657 |
| ESYT1    | -0.26062 | 0.000442 | 0.001711 |
| ESYT2    | 0.111562 | 0.138188 | 0.221175 |
| ESYT3    | 0.272325 | 0.000236 | 0.000997 |
| ETAA1    | 0.001224 | 0.987059 | 0.990867 |
| ETF1     | -0.04355 | 0.563763 | 0.664393 |
| ETFA     | 0.261916 | 0.000413 | 0.001614 |
| ETFB     | 0.116246 | 0.12229  | 0.200211 |
| ETFDH    | -0.29256 | 7.41E-05 | 0.000366 |
| ETHE1    | 0.508788 | 4.13E-13 | 2.12E-11 |
| ETNK1    | -0.14473 | 0.05392  | 0.102266 |
| ETNK2    | -0.12634 | 0.092882 | 0.160503 |
| ETS1     | -0.12609 | 0.093521 | 0.161368 |
| ETS2     | 0.263916 | 0.000371 | 0.001475 |
| ETV1     | -0.18331 | 0.014317 | 0.0335   |
| ETV2     | -0.07996 | 0.28871  | 0.398058 |
| ETV3L    | -0.08271 | 0.272405 | 0.380432 |
| ETV3     | -0.06788 | 0.367942 | 0.481419 |
| ETV4     | 0.273236 | 0.000224 | 0.000953 |
| ETV5     | -0.14231 | 0.058108 | 0.108707 |
| ETV6     | 0.291959 | 7.68E-05 | 0.000378 |
| ETV7     | 0.354145 | 1.24E-06 | 1.04E-05 |
| EVC2     | 0.076483 | 0.310242 | 0.420763 |
| EVC      | 0.061984 | 0.411114 | 0.523192 |
| EVI2A    | 0.021087 | 0.779949 | 0.843416 |
| EVI2B    | 0.011342 | 0.880562 | 0.917158 |
| EVI5L    | 0.08972  | 0.233659 | 0.337598 |
| EVI5     | -0.0027  | 0.971484 | 0.980809 |
| EVL      | -0.17262 | 0.021213 | 0.046632 |
| EVPLL    | 0.232486 | 0.001791 | 0.005672 |
| EVPL     | 0.59754  | 1.31E-18 | 2.82E-16 |
| EVX1     | 0.18443  | 0.013722 | 0.032322 |

|         |          |          |          |
|---------|----------|----------|----------|
| EWSR1   | -0.08921 | 0.236359 | 0.340282 |
| EXD1    | 0.102971 | 0.171386 | 0.263018 |
| EXD2    | -0.34418 | 2.55E-06 | 1.97E-05 |
| EXD3    | 0.26342  | 0.000381 | 0.001507 |
| EXO1    | 0.29624  | 5.95E-05 | 0.000304 |
| EXOC1   | 0.350291 | 1.64E-06 | 1.34E-05 |
| EXOC2   | -0.33966 | 3.51E-06 | 2.61E-05 |
| EXOC3L2 | -0.15887 | 0.034166 | 0.069874 |
| EXOC3L  | -0.11357 | 0.131197 | 0.21209  |
| EXOC3   | 0.027581 | 0.714772 | 0.792437 |
| EXOC4   | 0.086341 | 0.25181  | 0.357708 |
| EXOC5   | -0.31212 | 2.22E-05 | 0.000129 |
| EXOC6B  | -0.0171  | 0.820753 | 0.873168 |
| EXOC6   | -0.10347 | 0.169302 | 0.260507 |
| EXOC7   | -0.11288 | 0.133549 | 0.215119 |
| EXOC8   | -0.08399 | 0.265012 | 0.372342 |
| EXOG    | -0.28461 | 0.000118 | 0.00055  |
| EXOSC10 | 0.077996 | 0.300741 | 0.410836 |
| EXOSC1  | 0.271891 | 0.000241 | 0.001016 |
| EXOSC2  | 0.016721 | 0.824679 | 0.875884 |
| EXOSC3  | -0.05066 | 0.501869 | 0.608981 |
| EXOSC4  | 0.154464 | 0.039526 | 0.078933 |
| EXOSC5  | 0.311851 | 2.26E-05 | 0.000131 |
| EXOSC6  | 0.04233  | 0.574777 | 0.674264 |
| EXOSC7  | 0.368665 | 4.12E-07 | 4.02E-06 |
| EXOSC8  | 0.166855 | 0.026009 | 0.055487 |
| EXOSC9  | -0.03687 | 0.625112 | 0.718661 |
| EXPH5   | 0.245895 | 0.000938 | 0.00325  |
| EXT1    | 0.198489 | 0.007907 | 0.020236 |
| EXT2    | 0.073499 | 0.329558 | 0.441569 |
| EXTL1   | 0.081011 | 0.282388 | 0.391032 |
| EXTL2   | -0.08945 | 0.235059 | 0.339048 |
| EXTL3   | -0.32885 | 7.40E-06 | 5.00E-05 |
| EYA1    | -0.21323 | 0.004268 | 0.011955 |
| EYA2    | 0.277919 | 0.000173 | 0.000763 |
| EYA3    | -0.10196 | 0.175652 | 0.267984 |
| EYA4    | -0.06369 | 0.398335 | 0.511038 |
| EYS     | -0.36064 | 7.61E-07 | 6.88E-06 |
| EZH1    | -0.14852 | 0.047862 | 0.092624 |
| EZH2    | 0.247251 | 0.000877 | 0.003073 |
| EZR     | 0.5935   | 2.54E-18 | 4.93E-16 |
| F10     | -0.23018 | 0.001995 | 0.00622  |
| F11R    | 0.42104  | 4.85E-09 | 8.44E-08 |
| F11     | -0.06666 | 0.376639 | 0.4894   |
| F12     | 0.338267 | 3.87E-06 | 2.84E-05 |
| F13A1   | 0.020394 | 0.787011 | 0.849134 |
| F13B    | -0.04688 | 0.534347 | 0.638097 |
| F2RL1   | 0.425829 | 3.11E-09 | 5.71E-08 |
| F2RL2   | 0.073402 | 0.330198 | 0.442337 |
| F2RL3   | -0.0974  | 0.195889 | 0.292761 |
| F2R     | -0.00418 | 0.955871 | 0.969811 |
| F2      | -0.16479 | 0.027936 | 0.058936 |
| F3      | 0.390592 | 7.04E-08 | 8.57E-07 |
| F5      | -0.02166 | 0.77413  | 0.839097 |

|          |          |          |          |
|----------|----------|----------|----------|
| F7       | -0.41541 | 8.12E-09 | 1.32E-07 |
| F8A1     | -0.0125  | 0.868438 | 0.909177 |
| F8       | -0.34677 | 2.12E-06 | 1.67E-05 |
| F9       | 0.018972 | 0.801538 | 0.860308 |
| FA2H     | 0.57795  | 2.99E-17 | 4.20E-15 |
| FAAH2    | -0.01892 | 0.802105 | 0.86063  |
| FAAH     | 0.234788 | 0.001607 | 0.005169 |
| FABP12   | -0.16538 | 0.027378 | 0.057941 |
| FABP1    | 0.21926  | 0.003276 | 0.009512 |
| FABP2    | -0.08758 | 0.245043 | 0.349879 |
| FABP3    | 0.276546 | 0.000186 | 0.000814 |
| FABP4    | -0.13362 | 0.075386 | 0.135368 |
| FABP5L3  | -0.20647 | 0.00569  | 0.015282 |
| FABP5    | 0.011652 | 0.877323 | 0.915037 |
| FABP6    | 0.262006 | 0.000411 | 0.001607 |
| FABP7    | -0.02188 | 0.771924 | 0.837532 |
| FADD     | 0.515093 | 1.89E-13 | 1.05E-11 |
| FADS1    | -0.23565 | 0.001542 | 0.004992 |
| FADS2    | -0.1934  | 0.009693 | 0.024056 |
| FADS3    | -0.08991 | 0.232673 | 0.336395 |
| FADS6    | -0.09586 | 0.203069 | 0.301712 |
| FAF1     | 0.098498 | 0.190855 | 0.286601 |
| FAF2     | -0.07491 | 0.320349 | 0.43213  |
| FAHD1    | 0.126787 | 0.09171  | 0.158854 |
| FAHD2A   | -0.03147 | 0.676673 | 0.762467 |
| FAHD2B   | -0.1416  | 0.059384 | 0.110655 |
| FAH      | 0.22074  | 0.003067 | 0.009003 |
| FAIM2    | -0.08202 | 0.276409 | 0.384314 |
| FAIM3    | -0.13779 | 0.066629 | 0.12205  |
| FAIM     | 0.024661 | 0.743852 | 0.815486 |
| FAM100A  | 0.052306 | 0.488053 | 0.596684 |
| FAM100B  | 0.41085  | 1.22E-08 | 1.88E-07 |
| FAM101A  | 0.552915 | 1.22E-15 | 1.10E-13 |
| FAM101B  | -0.11846 | 0.115302 | 0.191386 |
| FAM102A  | 0.202769 | 0.006638 | 0.017448 |
| FAM102B  | -0.04697 | 0.533536 | 0.637509 |
| FAM103A1 | 0.026388 | 0.726613 | 0.802028 |
| FAM104A  | -0.07335 | 0.330543 | 0.442649 |
| FAM104B  | -0.2962  | 5.96E-05 | 0.000304 |
| FAM105A  | -0.44456 | 5.08E-10 | 1.18E-08 |
| FAM105B  | -0.17579 | 0.018922 | 0.042389 |
| FAM106A  | -0.13223 | 0.078508 | 0.139984 |
| FAM106C  | -0.07403 | 0.326065 | 0.438136 |
| FAM107A  | -0.29937 | 4.92E-05 | 0.000259 |
| FAM107B  | 0.064599 | 0.391618 | 0.504354 |
| FAM108A1 | 0.086788 | 0.249358 | 0.354861 |
| FAM108B1 | -0.39244 | 6.03E-08 | 7.48E-07 |
| FAM108C1 | 0.482227 | 9.38E-12 | 3.39E-10 |
| FAM109A  | 0.260421 | 0.000447 | 0.001727 |
| FAM109B  | 0.266872 | 0.000317 | 0.001287 |
| FAM10A4  | -0.26782 | 0.000301 | 0.001231 |
| FAM110A  | 0.437919 | 9.78E-10 | 2.09E-08 |
| FAM110B  | -0.3294  | 7.13E-06 | 4.83E-05 |
| FAM110C  | 0.143208 | 0.056519 | 0.106297 |

|           |          |          |          |
|-----------|----------|----------|----------|
| FAM111A   | 0.412928 | 1.02E-08 | 1.60E-07 |
| FAM111B   | 0.399703 | 3.25E-08 | 4.35E-07 |
| FAM113A   | -0.08509 | 0.258778 | 0.365115 |
| FAM113B   | 0.359568 | 8.25E-07 | 7.35E-06 |
| FAM114A1  | -0.01113 | 0.882815 | 0.918584 |
| FAM114A2  | -0.2643  | 0.000364 | 0.001449 |
| FAM115A   | -0.27879 | 0.000164 | 0.000732 |
| FAM115C   | -0.14028 | 0.061808 | 0.114481 |
| FAM116A   | 0.113723 | 0.130667 | 0.211336 |
| FAM116B   | 0.165607 | 0.027162 | 0.057543 |
| FAM117A   | -0.34831 | 1.89E-06 | 1.51E-05 |
| FAM117B   | -0.07932 | 0.292577 | 0.402212 |
| FAM118A   | 0.025112 | 0.739341 | 0.812072 |
| FAM118B   | 0.262043 | 0.00041  | 0.001605 |
| FAM119A   | 0.04696  | 0.533644 | 0.637599 |
| FAM119B   | 0.049611 | 0.510774 | 0.617134 |
| FAM120AOS | -0.04875 | 0.518168 | 0.624049 |
| FAM120A   | 0.120682 | 0.108575 | 0.182596 |
| FAM120B   | -0.45904 | 1.16E-10 | 3.22E-09 |
| FAM120C   | -0.52414 | 5.99E-14 | 3.72E-12 |
| FAM122A   | -0.41686 | 7.12E-09 | 1.18E-07 |
| FAM122B   | -0.07223 | 0.337964 | 0.450263 |
| FAM122C   | -0.01659 | 0.82599  | 0.87667  |
| FAM123A   | -0.3581  | 9.22E-07 | 8.07E-06 |
| FAM123B   | -0.20004 | 0.007425 | 0.019171 |
| FAM123C   | -0.32488 | 9.66E-06 | 6.30E-05 |
| FAM124A   | -0.1647  | 0.028025 | 0.059105 |
| FAM124B   | -0.00277 | 0.970732 | 0.9802   |
| FAM125A   | 0.462065 | 8.44E-11 | 2.42E-09 |
| FAM125B   | -0.42592 | 3.08E-09 | 5.67E-08 |
| FAM126A   | -0.23304 | 0.001746 | 0.005549 |
| FAM126B   | 0.155467 | 0.038247 | 0.076727 |
| FAM127A   | 0.17718  | 0.017983 | 0.040578 |
| FAM127B   | 0.18399  | 0.013953 | 0.032757 |
| FAM127C   | 0.005022 | 0.946959 | 0.964171 |
| FAM128A   | 0.30539  | 3.40E-05 | 0.000188 |
| FAM128B   | 0.151224 | 0.043908 | 0.086272 |
| FAM129A   | -0.01692 | 0.822603 | 0.874336 |
| FAM129B   | 0.452012 | 2.40E-10 | 6.07E-09 |
| FAM129C   | -0.1192  | 0.113026 | 0.188447 |
| FAM131A   | -0.08753 | 0.245335 | 0.350246 |
| FAM131B   | 0.046922 | 0.533977 | 0.637805 |
| FAM131C   | -0.12936 | 0.085259 | 0.149765 |
| FAM132A   | 0.417663 | 6.62E-09 | 1.10E-07 |
| FAM133A   | -0.16196 | 0.030777 | 0.064022 |
| FAM133B   | -0.28938 | 8.94E-05 | 0.000431 |
| FAM134A   | -0.05739 | 0.446702 | 0.557891 |
| FAM134B   | -0.31348 | 2.04E-05 | 0.00012  |
| FAM134C   | -0.00332 | 0.964868 | 0.976223 |
| FAM135A   | -0.01037 | 0.89074  | 0.923847 |
| FAM135B   | -0.33989 | 3.46E-06 | 2.58E-05 |
| FAM136A   | 0.258069 | 0.000505 | 0.001918 |
| FAM136B   | 0.143024 | 0.056841 | 0.10676  |
| FAM138B   | -0.13604 | 0.070194 | 0.127575 |

|          |          |          |          |
|----------|----------|----------|----------|
| FAM138D  | -0.01276 | 0.865737 | 0.906969 |
| FAM138E  | 0.010517 | 0.889195 | 0.923124 |
| FAM138F  | 0.011492 | 0.878997 | 0.916068 |
| FAM13AOS | 0.064061 | 0.395582 | 0.5083   |
| FAM13A   | -0.00349 | 0.963091 | 0.974894 |
| FAM13B   | -0.26882 | 0.000285 | 0.001176 |
| FAM13C   | -0.22729 | 0.00228  | 0.006987 |
| FAM149A  | 0.133152 | 0.076419 | 0.136864 |
| FAM149B1 | 0.159216 | 0.033771 | 0.069186 |
| FAM150A  | 0.365506 | 5.25E-07 | 4.97E-06 |
| FAM150B  | -0.09661 | 0.199555 | 0.297296 |
| FAM151A  | -0.07203 | 0.339351 | 0.4516   |
| FAM151B  | -0.11916 | 0.113127 | 0.188566 |
| FAM153A  | 0.077232 | 0.305514 | 0.415748 |
| FAM153B  | 0.059884 | 0.427174 | 0.539259 |
| FAM153C  | -0.11729 | 0.118939 | 0.196057 |
| FAM154A  | -0.11662 | 0.121075 | 0.198634 |
| FAM154B  | -0.41127 | 1.18E-08 | 1.82E-07 |
| FAM155A  | 0.069838 | 0.354278 | 0.467282 |
| FAM155B  | -0.24897 | 0.000804 | 0.002861 |
| FAM156A  | 0.08833  | 0.241012 | 0.345398 |
| FAM157A  | -0.13578 | 0.070735 | 0.128363 |
| FAM157B  | -0.13123 | 0.080802 | 0.143401 |
| FAM158A  | 0.086373 | 0.251634 | 0.357557 |
| FAM159A  | 0.157543 | 0.03571  | 0.072518 |
| FAM160A1 | 0.073616 | 0.328783 | 0.440754 |
| FAM160A2 | 0.34817  | 1.91E-06 | 1.53E-05 |
| FAM160B1 | -0.31878 | 1.45E-05 | 8.95E-05 |
| FAM160B2 | 0.253177 | 0.00065  | 0.002372 |
| FAM161A  | -0.26952 | 0.000275 | 0.001137 |
| FAM161B  | -0.09192 | 0.222365 | 0.324433 |
| FAM162A  | 0.214305 | 0.004072 | 0.011501 |
| FAM162B  | 0.020512 | 0.785807 | 0.848267 |
| FAM163A  | -0.37044 | 3.59E-07 | 3.57E-06 |
| FAM163B  | -0.04427 | 0.55732  | 0.658606 |
| FAM164A  | 0.072792 | 0.334241 | 0.446483 |
| FAM164C  | -0.20115 | 0.007096 | 0.018427 |
| FAM165B  | -0.20729 | 0.005498 | 0.014833 |
| FAM166A  | -0.15271 | 0.041845 | 0.082777 |
| FAM166B  | -0.18869 | 0.011657 | 0.028142 |
| FAM167A  | -0.31765 | 1.56E-05 | 9.54E-05 |
| FAM167B  | -0.03743 | 0.619903 | 0.714042 |
| FAM168A  | -0.23167 | 0.001861 | 0.005864 |
| FAM168B  | -0.41079 | 1.23E-08 | 1.88E-07 |
| FAM169A  | -0.48082 | 1.10E-11 | 3.89E-10 |
| FAM169B  | 0.174566 | 0.019779 | 0.044013 |
| FAM170A  | -0.0789  | 0.295175 | 0.404996 |
| FAM170B  | -0.06789 | 0.36788  | 0.481417 |
| FAM171A1 | -0.24842 | 0.000827 | 0.002923 |
| FAM171A2 | -0.11137 | 0.138858 | 0.22208  |
| FAM171B  | -0.32951 | 7.08E-06 | 4.80E-05 |
| FAM172A  | -0.48814 | 4.79E-12 | 1.86E-10 |
| FAM173A  | 0.248333 | 0.000831 | 0.002932 |
| FAM173B  | -0.33899 | 3.68E-06 | 2.72E-05 |

|          |          |          |          |
|----------|----------|----------|----------|
| FAM174A  | -0.29584 | 6.09E-05 | 0.000309 |
| FAM174B  | -0.28948 | 8.88E-05 | 0.000429 |
| FAM175A  | -0.25846 | 0.000495 | 0.001887 |
| FAM175B  | 0.006619 | 0.930122 | 0.951732 |
| FAM176A  | 0.102251 | 0.174415 | 0.266776 |
| FAM176B  | 0.290421 | 8.41E-05 | 0.000409 |
| FAM177A1 | 0.266894 | 0.000317 | 0.001286 |
| FAM177B  | -0.00757 | 0.92017  | 0.944628 |
| FAM178A  | -0.32859 | 7.53E-06 | 5.07E-05 |
| FAM178B  | 0.217452 | 0.003549 | 0.010192 |
| FAM179A  | -0.11643 | 0.121706 | 0.199454 |
| FAM179B  | -0.37295 | 2.94E-07 | 3.01E-06 |
| FAM180A  | #####    | 0.999007 | 0.999108 |
| FAM180B  | -0.15679 | 0.036611 | 0.074002 |
| FAM181A  | -0.01344 | 0.85864  | 0.901686 |
| FAM181B  | -0.03615 | 0.63188  | 0.724    |
| FAM182A  | -0.11987 | 0.110997 | 0.185881 |
| FAM182B  | -0.06423 | 0.39435  | 0.50708  |
| FAM183A  | -0.28735 | 0.000101 | 0.000478 |
| FAM183B  | 0.040739 | 0.589248 | 0.68724  |
| FAM184A  | -0.43419 | 1.40E-09 | 2.83E-08 |
| FAM184B  | -0.25093 | 0.000729 | 0.002623 |
| FAM185A  | 0.202193 | 0.006798 | 0.017803 |
| FAM186A  | -0.11081 | 0.140886 | 0.22465  |
| FAM186B  | -0.18715 | 0.012368 | 0.029608 |
| FAM187B  | 0.107749 | 0.152259 | 0.239216 |
| FAM188A  | -0.1841  | 0.013894 | 0.032649 |
| FAM188B  | 0.05373  | 0.476271 | 0.585829 |
| FAM189A1 | -0.18609 | 0.012881 | 0.030649 |
| FAM189A2 | -0.12897 | 0.086203 | 0.151089 |
| FAM189B  | 0.266774 | 0.000319 | 0.001293 |
| FAM18A   | -0.12695 | 0.091283 | 0.158225 |
| FAM18B2  | -0.1789  | 0.016882 | 0.038477 |
| FAM18B   | -0.23714 | 0.001437 | 0.004694 |
| FAM190A  | -0.04112 | 0.585788 | 0.684314 |
| FAM190B  | -0.26423 | 0.000365 | 0.001453 |
| FAM192A  | 0.337959 | 3.96E-06 | 2.89E-05 |
| FAM193A  | -0.37736 | 2.08E-07 | 2.21E-06 |
| FAM193B  | 0.114269 | 0.128819 | 0.208963 |
| FAM194A  | -0.16197 | 0.030774 | 0.064022 |
| FAM194B  | 0.03241  | 0.667578 | 0.754886 |
| FAM195A  | 0.154503 | 0.039476 | 0.078864 |
| FAM195B  | 0.004807 | 0.94922  | 0.965678 |
| FAM196A  | -0.18753 | 0.01219  | 0.029243 |
| FAM196B  | 0.04479  | 0.552742 | 0.654754 |
| FAM198A  | 0.029105 | 0.699749 | 0.78064  |
| FAM198B  | -0.06919 | 0.358774 | 0.471954 |
| FAM199X  | -0.03358 | 0.656348 | 0.74517  |
| FAM19A1  | -0.31923 | 1.40E-05 | 8.72E-05 |
| FAM19A2  | -0.35868 | 8.82E-07 | 7.78E-06 |
| FAM19A3  | 0.028071 | 0.709926 | 0.788745 |
| FAM19A4  | -0.37009 | 3.68E-07 | 3.66E-06 |
| FAM19A5  | 0.003879 | 0.959017 | 0.972066 |
| FAM200A  | -0.2069  | 0.005588 | 0.015043 |

|         |          |          |          |
|---------|----------|----------|----------|
| FAM200B | -0.24351 | 0.001055 | 0.003595 |
| FAM20A  | -0.07222 | 0.338039 | 0.450279 |
| FAM20B  | -0.13031 | 0.082981 | 0.146519 |
| FAM20C  | -0.03109 | 0.680342 | 0.765032 |
| FAM21A  | -0.10321 | 0.170402 | 0.261873 |
| FAM21B  | -0.01409 | 0.851877 | 0.89644  |
| FAM21C  | -0.19779 | 0.008134 | 0.020733 |
| FAM22A  | -0.19707 | 0.008375 | 0.021241 |
| FAM22D  | -0.35215 | 1.43E-06 | 1.19E-05 |
| FAM22F  | 0.162475 | 0.030248 | 0.063099 |
| FAM22G  | 0.021154 | 0.779271 | 0.843098 |
| FAM23A  | -0.22877 | 0.00213  | 0.00659  |
| FAM24B  | 0.251915 | 0.000693 | 0.002511 |
| FAM25A  | 0.471715 | 3.00E-11 | 9.67E-10 |
| FAM25B  | 0.404886 | 2.07E-08 | 2.96E-07 |
| FAM26D  | -0.12593 | 0.093932 | 0.161957 |
| FAM26E  | 0.016939 | 0.822436 | 0.874218 |
| FAM26F  | -0.01537 | 0.838688 | 0.886193 |
| FAM27A  | 0.131341 | 0.080545 | 0.142996 |
| FAM27B  | 0.017591 | 0.81572  | 0.869573 |
| FAM27C  | 0.12054  | 0.108995 | 0.183159 |
| FAM32A  | 0.432653 | 1.63E-09 | 3.23E-08 |
| FAM35A  | -0.0674  | 0.371341 | 0.484418 |
| FAM35B2 | -0.06239 | 0.408021 | 0.520262 |
| FAM35B  | -0.10736 | 0.153738 | 0.241157 |
| FAM36A  | 0.072099 | 0.338874 | 0.451074 |
| FAM38A  | 0.429542 | 2.19E-09 | 4.19E-08 |
| FAM38B  | -0.03107 | 0.680525 | 0.765194 |
| FAM3A   | 0.061125 | 0.417639 | 0.52994  |
| FAM3B   | 0.081173 | 0.281423 | 0.389914 |
| FAM3C   | 0.299791 | 4.79E-05 | 0.000253 |
| FAM3D   | 0.343612 | 2.66E-06 | 2.04E-05 |
| FAM40A  | -0.17153 | 0.022055 | 0.04819  |
| FAM40B  | 0.372769 | 2.99E-07 | 3.05E-06 |
| FAM41C  | -0.09304 | 0.216724 | 0.317991 |
| FAM43A  | 0.078688 | 0.296458 | 0.406333 |
| FAM43B  | 0.110746 | 0.141112 | 0.224921 |
| FAM45A  | 0.050504 | 0.503184 | 0.610383 |
| FAM45B  | -0.08087 | 0.283218 | 0.391989 |
| FAM46A  | -0.41326 | 9.86E-09 | 1.56E-07 |
| FAM46B  | 0.066617 | 0.376963 | 0.489636 |
| FAM46C  | -0.47638 | 1.80E-11 | 6.07E-10 |
| FAM46D  | -0.1282  | 0.08812  | 0.15378  |
| FAM47A  | -0.05148 | 0.494946 | 0.603048 |
| FAM47B  | -0.01832 | 0.808206 | 0.864254 |
| FAM47C  | -0.1235  | 0.100524 | 0.171312 |
| FAM47E  | -0.23083 | 0.001936 | 0.006063 |
| FAM48A  | 0.221633 | 0.002947 | 0.008716 |
| FAM48B1 | 0.010911 | 0.885066 | 0.920087 |
| FAM48B2 | -0.08411 | 0.264322 | 0.371585 |
| FAM49A  | 0.068679 | 0.362344 | 0.475573 |
| FAM49B  | 0.158545 | 0.034537 | 0.070486 |
| FAM50A  | 0.079897 | 0.289077 | 0.398426 |
| FAM50B  | -0.09901 | 0.18857  | 0.283817 |



|         |          |          |          |
|---------|----------|----------|----------|
| FAM53A  | -0.07588 | 0.314079 | 0.425092 |
| FAM53B  | -0.38403 | 1.21E-07 | 1.38E-06 |
| FAM53C  | -0.3421  | 2.96E-06 | 2.25E-05 |
| FAM54A  | 0.196482 | 0.008574 | 0.021661 |
| FAM54B  | -0.27851 | 0.000167 | 0.000741 |
| FAM55A  | -0.17952 | 0.016497 | 0.03777  |
| FAM55B  | -0.14008 | 0.06219  | 0.115134 |
| FAM55C  | -0.39439 | 5.12E-08 | 6.50E-07 |
| FAM55D  | -0.23069 | 0.001949 | 0.006096 |
| FAM57A  | -0.07278 | 0.334316 | 0.446531 |
| FAM57B  | -0.30682 | 3.11E-05 | 0.000174 |
| FAM58A  | -0.02036 | 0.787348 | 0.849281 |
| FAM58B  | -0.07938 | 0.292233 | 0.401851 |
| FAM59A  | -0.07057 | 0.349266 | 0.461922 |
| FAM5B   | -0.36715 | 4.63E-07 | 4.45E-06 |
| FAM5C   | -0.21415 | 0.0041   | 0.011571 |
| FAM60A  | 0.146284 | 0.051365 | 0.09821  |
| FAM63A  | -0.04613 | 0.540898 | 0.64401  |
| FAM63B  | 0.049877 | 0.508507 | 0.615149 |
| FAM64A  | 0.352541 | 1.39E-06 | 1.15E-05 |
| FAM65A  | 0.284298 | 0.00012  | 0.000559 |
| FAM65B  | -0.14335 | 0.056265 | 0.10596  |
| FAM65C  | -0.1171  | 0.119547 | 0.196813 |
| FAM66A  | -0.19427 | 0.009366 | 0.023349 |
| FAM66C  | -0.21573 | 0.003827 | 0.010898 |
| FAM66D  | -0.04412 | 0.558705 | 0.65969  |
| FAM66E  | -0.06661 | 0.376981 | 0.489636 |
| FAM69A  | -0.07812 | 0.299976 | 0.410074 |
| FAM69B  | -0.3908  | 6.92E-08 | 8.44E-07 |
| FAM69C  | 0.272887 | 0.000228 | 0.000969 |
| FAM70A  | -0.1674  | 0.025517 | 0.054554 |
| FAM70B  | -0.022   | 0.770647 | 0.836744 |
| FAM71A  | 0.024272 | 0.747758 | 0.818774 |
| FAM71C  | -0.04366 | 0.56277  | 0.6635   |
| FAM71D  | 0.220002 | 0.00317  | 0.009256 |
| FAM71E1 | 0.076632 | 0.309298 | 0.419742 |
| FAM71E2 | 0.137942 | 0.066328 | 0.121576 |
| FAM71F1 | -0.33095 | 6.42E-06 | 4.42E-05 |
| FAM71F2 | -0.10744 | 0.153444 | 0.240752 |
| FAM72A  | 0.249357 | 0.000789 | 0.002814 |
| FAM72B  | 0.341543 | 3.08E-06 | 2.32E-05 |
| FAM72D  | 0.316737 | 1.65E-05 | 0.0001   |
| FAM73A  | -0.21811 | 0.003447 | 0.009937 |
| FAM73B  | 0.030905 | 0.682156 | 0.76681  |
| FAM74A1 | -0.01057 | 0.888684 | 0.9227   |
| FAM74A3 | -0.18796 | 0.01199  | 0.028853 |
| FAM74A4 | -0.05299 | 0.482369 | 0.591599 |
| FAM75A2 | 0.078479 | 0.297751 | 0.407795 |
| FAM75A3 | 0.009613 | 0.898658 | 0.929269 |
| FAM75A5 | 0.061313 | 0.41621  | 0.528555 |
| FAM75C1 | 0.141024 | 0.060432 | 0.112225 |
| FAM76A  | -0.06768 | 0.369413 | 0.482737 |
| FAM76B  | -0.00094 | 0.990087 | 0.992798 |
| FAM78A  | -0.08903 | 0.23727  | 0.341221 |

|         |          |          |          |
|---------|----------|----------|----------|
| FAM78B  | -0.08501 | 0.259232 | 0.3656   |
| FAM7A2  | 0.001984 | 0.97903  | 0.985559 |
| FAM7A3  | 0.051657 | 0.493477 | 0.601802 |
| FAM81A  | 0.121065 | 0.10745  | 0.181089 |
| FAM81B  | 0.195741 | 0.008832 | 0.022199 |
| FAM82A1 | 0.003198 | 0.966212 | 0.977083 |
| FAM82A2 | 0.33861  | 3.78E-06 | 2.78E-05 |
| FAM82B  | 0.047892 | 0.525546 | 0.630898 |
| FAM83A  | 0.631119 | 3.63E-21 | 1.63E-18 |
| FAM83B  | 0.374499 | 2.61E-07 | 2.70E-06 |
| FAM83C  | 0.167811 | 0.025156 | 0.053898 |
| FAM83D  | 0.222303 | 0.00286  | 0.008487 |
| FAM83E  | 0.427818 | 2.58E-09 | 4.84E-08 |
| FAM83F  | -0.03826 | 0.612083 | 0.707631 |
| FAM83G  | 0.035925 | 0.634019 | 0.725778 |
| FAM83H  | 0.518912 | 1.17E-13 | 6.78E-12 |
| FAM84A  | -0.04671 | 0.535795 | 0.639358 |
| FAM84B  | 0.173456 | 0.020587 | 0.045511 |
| FAM86A  | 0.288419 | 9.45E-05 | 0.000452 |
| FAM86B1 | 0.123612 | 0.1002   | 0.170866 |
| FAM86B2 | -0.04985 | 0.508749 | 0.615253 |
| FAM86C  | 0.165611 | 0.027158 | 0.057543 |
| FAM86D  | 0.127756 | 0.089237 | 0.155305 |
| FAM89A  | -0.01925 | 0.798659 | 0.858205 |
| FAM89B  | 0.332731 | 5.68E-06 | 3.98E-05 |
| FAM8A1  | -0.367   | 4.68E-07 | 4.49E-06 |
| FAM90A1 | 0.137392 | 0.067429 | 0.123275 |
| FAM90A7 | 0.027936 | 0.711266 | 0.789789 |
| FAM91A1 | 0.039003 | 0.605226 | 0.701344 |
| FAM92A1 | -0.42589 | 3.09E-09 | 5.68E-08 |
| FAM92A3 | 0.1541   | 0.04     | 0.079685 |
| FAM92B  | -0.27139 | 0.000248 | 0.00104  |
| FAM95B1 | 0.033633 | 0.655821 | 0.744828 |
| FAM96A  | -0.03427 | 0.64969  | 0.738872 |
| FAM96B  | 0.288286 | 9.53E-05 | 0.000455 |
| FAM98A  | 0.08074  | 0.284003 | 0.392883 |
| FAM98B  | -0.2543  | 0.000614 | 0.00226  |
| FAM98C  | 0.248959 | 0.000805 | 0.002862 |
| FAM99A  | -0.15245 | 0.042209 | 0.08346  |
| FAM99B  | 0.021726 | 0.773455 | 0.838871 |
| FAM9A   | -0.02498 | 0.740681 | 0.812957 |
| FAM9B   | 0.0717   | 0.341561 | 0.453869 |
| FAM9C   | -0.16324 | 0.029463 | 0.061701 |
| FANCA   | 0.424342 | 3.57E-09 | 6.50E-08 |
| FANCB   | 0.167555 | 0.025382 | 0.054289 |
| FANCC   | -0.35473 | 1.18E-06 | 1.00E-05 |
| FANCD2  | 0.295701 | 6.14E-05 | 0.000312 |
| FANCE   | 0.012222 | 0.871373 | 0.911235 |
| FANCF   | -0.03014 | 0.689601 | 0.772719 |
| FANCG   | 0.021655 | 0.774175 | 0.8391   |
| FANCI   | 0.258694 | 0.000489 | 0.001867 |
| FANCL   | 0.238537 | 0.001344 | 0.004428 |
| FANCM   | -0.22382 | 0.00267  | 0.007993 |
| FANK1   | 0.316296 | 1.70E-05 | 0.000103 |

|         |          |          |          |
|---------|----------|----------|----------|
| FAP     | 0.227812 | 0.002226 | 0.006846 |
| FAR1    | 0.218258 | 0.003425 | 0.009888 |
| FAR2    | 0.116977 | 0.119941 | 0.19733  |
| FARP1   | 0.26155  | 0.000421 | 0.00164  |
| FARP2   | 0.222637 | 0.002817 | 0.008376 |
| FARS2   | -0.07161 | 0.342142 | 0.454479 |
| FARSA   | 0.160196 | 0.032676 | 0.067278 |
| FARSB   | 0.270423 | 0.000261 | 0.001091 |
| FASLG   | -0.19946 | 0.007601 | 0.019556 |
| FASN    | -0.10656 | 0.156881 | 0.245113 |
| FASTKD1 | -0.12805 | 0.088498 | 0.154304 |
| FASTKD2 | 0.028191 | 0.708751 | 0.787882 |
| FASTKD3 | -0.30179 | 4.24E-05 | 0.000228 |
| FASTKD5 | -0.27897 | 0.000163 | 0.000725 |
| FASTK   | 0.075207 | 0.31841  | 0.4301   |
| FAS     | 0.138809 | 0.064624 | 0.11885  |
| FAT1    | 0.166459 | 0.026371 | 0.056149 |
| FAT2    | 0.128279 | 0.087924 | 0.153546 |
| FAT3    | -0.03114 | 0.679918 | 0.764685 |
| FAT4    | -0.15133 | 0.043764 | 0.086041 |
| FATE1   | 0.043162 | 0.56728  | 0.667225 |
| FAU     | 0.274025 | 0.000215 | 0.000917 |
| FBF1    | -0.22707 | 0.002303 | 0.007046 |
| FBLIM1  | 0.308264 | 2.84E-05 | 0.000161 |
| FBLL1   | -0.24324 | 0.001069 | 0.003635 |
| FBLN1   | 0.039925 | 0.596717 | 0.693842 |
| FBLN2   | 0.100141 | 0.183525 | 0.277512 |
| FBLN5   | -0.16838 | 0.02466  | 0.053037 |
| FBLN7   | -0.11929 | 0.11275  | 0.188069 |
| FBL     | 0.19026  | 0.010966 | 0.026727 |
| FBN1    | 0.04966  | 0.510358 | 0.616805 |
| FBN2    | -0.00313 | 0.966886 | 0.977426 |
| FBN3    | 0.064526 | 0.392159 | 0.504821 |
| FBP1    | 0.436284 | 1.15E-09 | 2.38E-08 |
| FBP2    | 0.059046 | 0.433685 | 0.545239 |
| FBRSL1  | -0.14896 | 0.0472   | 0.091585 |
| FBR     | 0.130128 | 0.083404 | 0.147122 |
| FBXL12  | 0.417984 | 6.43E-09 | 1.08E-07 |
| FBXL13  | 0.036195 | 0.631476 | 0.723696 |
| FBXL14  | -0.24143 | 0.001168 | 0.003925 |
| FBXL15  | 0.042478 | 0.573445 | 0.6731   |
| FBXL16  | -0.34581 | 2.27E-06 | 1.78E-05 |
| FBXL17  | -0.37739 | 2.07E-07 | 2.21E-06 |
| FBXL18  | -0.30509 | 3.46E-05 | 0.000191 |
| FBXL19  | 0.429816 | 2.13E-09 | 4.10E-08 |
| FBXL20  | -0.02171 | 0.773611 | 0.838948 |
| FBXL21  | -0.27722 | 0.00018  | 0.000789 |
| FBXL22  | -0.01095 | 0.88465  | 0.919946 |
| FBXL2   | 0.078454 | 0.297902 | 0.407956 |
| FBXL3   | -0.10784 | 0.151904 | 0.238773 |
| FBXL4   | -0.43388 | 1.45E-09 | 2.90E-08 |
| FBXL5   | -0.35543 | 1.12E-06 | 9.61E-06 |
| FBXL6   | 0.360803 | 7.52E-07 | 6.80E-06 |
| FBXL7   | -0.04932 | 0.513275 | 0.619401 |

|          |          |          |          |
|----------|----------|----------|----------|
| FBXL8    | 0.239136 | 0.001305 | 0.00432  |
| FBX010   | -0.44838 | 3.47E-10 | 8.47E-09 |
| FBX011   | -0.10582 | 0.159788 | 0.248478 |
| FBX015   | -0.34077 | 3.25E-06 | 2.44E-05 |
| FBX016   | -0.19312 | 0.009802 | 0.024275 |
| FBX017   | -0.15831 | 0.034805 | 0.070909 |
| FBX018   | -0.14687 | 0.050437 | 0.096688 |
| FBX021   | -0.33116 | 6.32E-06 | 4.37E-05 |
| FBX0220S | 0.267585 | 0.000305 | 0.001245 |
| FBX022   | 0.11784  | 0.117217 | 0.193738 |
| FBX024   | 0.05562  | 0.460873 | 0.571188 |
| FBX025   | -0.14409 | 0.055001 | 0.103986 |
| FBX027   | -0.18502 | 0.01342  | 0.03173  |
| FBX028   | 0.158947 | 0.034076 | 0.06971  |
| FBX02    | 0.076702 | 0.30886  | 0.419263 |
| FBX030   | -0.36727 | 4.59E-07 | 4.41E-06 |
| FBX031   | -0.32202 | 1.17E-05 | 7.45E-05 |
| FBX032   | 0.203836 | 0.006351 | 0.016793 |
| FBX033   | -0.45284 | 2.20E-10 | 5.62E-09 |
| FBX034   | 0.250339 | 0.000751 | 0.002694 |
| FBX036   | -0.13927 | 0.06374  | 0.117559 |
| FBX038   | -0.06678 | 0.375806 | 0.488823 |
| FBX039   | 0.23943  | 0.001287 | 0.004272 |
| FBX03    | -0.092   | 0.221952 | 0.324045 |
| FBX040   | -0.12247 | 0.103412 | 0.175466 |
| FBX041   | -0.15194 | 0.042904 | 0.084567 |
| FBX042   | -0.07473 | 0.321469 | 0.433285 |
| FBX043   | -0.03203 | 0.671288 | 0.758127 |
| FBX044   | -0.04248 | 0.573466 | 0.6731   |
| FBX045   | -0.07606 | 0.312943 | 0.423841 |
| FBX046   | 0.192351 | 0.010103 | 0.024917 |
| FBX047   | 0.092324 | 0.220312 | 0.322079 |
| FBX048   | -0.29848 | 5.19E-05 | 0.000271 |
| FBX04    | 0.009286 | 0.902086 | 0.931498 |
| FBX05    | -0.34052 | 3.30E-06 | 2.48E-05 |
| FBX06    | 0.164852 | 0.02788  | 0.058837 |
| FBX07    | -0.13301 | 0.076742 | 0.137355 |
| FBX08    | -0.22543 | 0.002482 | 0.00751  |
| FBX09    | -0.47467 | 2.17E-11 | 7.18E-10 |
| FBXW10   | 0.324582 | 9.86E-06 | 6.42E-05 |
| FBXW11   | -0.31482 | 1.87E-05 | 0.000112 |
| FBXW12   | -0.22203 | 0.002895 | 0.008581 |
| FBXW2    | -0.32836 | 7.65E-06 | 5.15E-05 |
| FBXW4    | -0.0155  | 0.837297 | 0.885148 |
| FBXW5    | 0.082328 | 0.274607 | 0.382508 |
| FBXW7    | -0.25099 | 0.000727 | 0.002617 |
| FBXW8    | -0.42093 | 4.90E-09 | 8.52E-08 |
| FBXW9    | 0.254652 | 0.000603 | 0.002226 |
| FCAMR    | -0.02507 | 0.739768 | 0.81236  |
| FCAR     | -0.1417  | 0.059205 | 0.11033  |
| FCER1A   | 0.057179 | 0.448388 | 0.559649 |
| FCER1G   | 0.145893 | 0.051998 | 0.099209 |
| FCER2    | -0.08177 | 0.277901 | 0.386061 |
| FCF1     | 0.024821 | 0.74225  | 0.814227 |

|         |          |          |          |
|---------|----------|----------|----------|
| FCGBP   | -0.07964 | 0.290612 | 0.400067 |
| FCGR1A  | 0.066088 | 0.380771 | 0.493503 |
| FCGR1B  | 0.073753 | 0.327884 | 0.439744 |
| FCGR1C  | 0.062715 | 0.405607 | 0.518119 |
| FCGR2A  | 0.030289 | 0.688166 | 0.771431 |
| FCGR2B  | 0.217521 | 0.003538 | 0.010163 |
| FCGR2C  | 0.132326 | 0.07828  | 0.139664 |
| FCGR3A  | 0.093384 | 0.215035 | 0.315931 |
| FCGR3B  | -0.13472 | 0.072988 | 0.131653 |
| FCGRT   | 0.193362 | 0.009708 | 0.02408  |
| FCH01   | 0.22339  | 0.002723 | 0.008132 |
| FCH02   | 0.124979 | 0.096473 | 0.165667 |
| FCHSD1  | 0.338686 | 3.76E-06 | 2.77E-05 |
| FCHSD2  | -0.03669 | 0.626791 | 0.720005 |
| FCN1    | -0.03466 | 0.646006 | 0.736152 |
| FCN2    | -0.23636 | 0.001491 | 0.004843 |
| FCN3    | -0.22561 | 0.002463 | 0.007462 |
| FCRL1   | -0.09956 | 0.186105 | 0.280683 |
| FCRL2   | -0.05166 | 0.493449 | 0.601802 |
| FCRL3   | -0.09828 | 0.191828 | 0.287691 |
| FCRL4   | 0.082031 | 0.276351 | 0.38426  |
| FCRL5   | 0.017386 | 0.817822 | 0.870889 |
| FCRL6   | -0.09379 | 0.213051 | 0.313597 |
| FCRLA   | -0.06283 | 0.404712 | 0.517309 |
| FCRLB   | 0.267765 | 0.000302 | 0.001235 |
| FDFT1   | 0.357291 | 9.79E-07 | 8.51E-06 |
| FDPSL2A | 0.221037 | 0.003027 | 0.008914 |
| FDPS    | 0.261722 | 0.000417 | 0.001628 |
| FDX1L   | 0.039948 | 0.596509 | 0.693795 |
| FDX1    | 0.12937  | 0.085235 | 0.149737 |
| FDXACB1 | 0.032812 | 0.663709 | 0.751973 |
| FDXR    | 0.126146 | 0.093377 | 0.161176 |
| FECH    | -0.40132 | 2.83E-08 | 3.86E-07 |
| FEM1A   | -0.36688 | 4.73E-07 | 4.53E-06 |
| FEM1B   | -0.39848 | 3.61E-08 | 4.77E-07 |
| FEM1C   | 0.048638 | 0.519104 | 0.624758 |
| FEN1    | 0.181873 | 0.015112 | 0.035069 |
| FER1L4  | 0.550045 | 1.83E-15 | 1.55E-13 |
| FER1L5  | -0.04601 | 0.541946 | 0.645219 |
| FER1L6  | 0.288802 | 9.25E-05 | 0.000444 |
| FERD3L  | 0.021679 | 0.773931 | 0.839097 |
| FERMT1  | 0.465203 | 6.06E-11 | 1.81E-09 |
| FERMT2  | -0.11504 | 0.126246 | 0.205616 |
| FERMT3  | 0.252785 | 0.000663 | 0.002411 |
| FER     | 0.05744  | 0.446317 | 0.557691 |
| FES     | 0.175309 | 0.019253 | 0.042994 |
| FETUB   | 0.152253 | 0.042475 | 0.083899 |
| FEV     | -0.19788 | 0.008105 | 0.02067  |
| FEZ1    | 0.099691 | 0.18551  | 0.279935 |
| FEZ2    | 0.399106 | 3.42E-08 | 4.56E-07 |
| FEZF1   | 0.161912 | 0.030833 | 0.06409  |
| FEZF2   | -0.23954 | 0.00128  | 0.004253 |
| FFAR1   | -0.07186 | 0.34045  | 0.452739 |
| FFAR2   | -0.38417 | 1.20E-07 | 1.37E-06 |

|          |          |          |          |
|----------|----------|----------|----------|
| FFAR3    | -0.11696 | 0.119992 | 0.197398 |
| FGA      | 0.035629 | 0.636823 | 0.728398 |
| FGB      | -0.02829 | 0.707739 | 0.787155 |
| FGD1     | -0.22029 | 0.00313  | 0.009155 |
| FGD2     | 0.20965  | 0.004975 | 0.013636 |
| FGD3     | 0.029412 | 0.696739 | 0.778116 |
| FGD4     | 0.118212 | 0.116054 | 0.192247 |
| FGD5     | 0.134903 | 0.072595 | 0.131131 |
| FGD6     | 0.392561 | 5.97E-08 | 7.42E-07 |
| FGF10    | -0.26588 | 0.000334 | 0.001345 |
| FGF11    | 0.174838 | 0.019585 | 0.043621 |
| FGF12    | -0.3018  | 4.24E-05 | 0.000228 |
| FGF13    | -0.42828 | 2.47E-09 | 4.65E-08 |
| FGF14    | -0.21745 | 0.003549 | 0.010193 |
| FGF16    | -0.04323 | 0.566626 | 0.666813 |
| FGF17    | -0.15754 | 0.035713 | 0.072518 |
| FGF18    | 0.125381 | 0.095397 | 0.16409  |
| FGF19    | 0.375552 | 2.40E-07 | 2.52E-06 |
| FGF1     | -0.03486 | 0.644139 | 0.734302 |
| FGF20    | 0.295285 | 6.30E-05 | 0.000319 |
| FGF21    | -0.09983 | 0.18491  | 0.27918  |
| FGF22    | -0.00136 | 0.985593 | 0.989849 |
| FGF23    | 0.125263 | 0.095712 | 0.164489 |
| FGF2     | 0.181088 | 0.015562 | 0.035924 |
| FGF3     | 0.210805 | 0.004736 | 0.013077 |
| FGF4     | 0.047683 | 0.527354 | 0.632415 |
| FGF5     | 0.044539 | 0.55497  | 0.656535 |
| FGF6     | -0.00476 | 0.949686 | 0.965903 |
| FGF7     | -0.21612 | 0.003762 | 0.010739 |
| FGF8     | 0.189134 | 0.011457 | 0.027742 |
| FGF9     | -0.13872 | 0.064788 | 0.119141 |
| FGFBP1   | 0.615253 | 6.40E-20 | 1.83E-17 |
| FGFBP2   | -0.16146 | 0.031308 | 0.0649   |
| FGFBP3   | -0.2734  | 0.000222 | 0.000946 |
| FGFR10P2 | -0.24269 | 0.001099 | 0.003724 |
| FGFR10P  | -0.04722 | 0.531357 | 0.635558 |
| FGFR1    | -0.34646 | 2.17E-06 | 1.70E-05 |
| FGFR2    | 0.137713 | 0.066785 | 0.122301 |
| FGFR3    | 0.027702 | 0.713572 | 0.79155  |
| FGFR4    | 0.071146 | 0.345313 | 0.457656 |
| FGFRL1   | 0.367108 | 4.64E-07 | 4.46E-06 |
| FGGY     | -0.09623 | 0.201325 | 0.299428 |
| FGG      | 0.161155 | 0.031635 | 0.065441 |
| FGL1     | -0.24843 | 0.000827 | 0.002923 |
| FGL2     | -0.13285 | 0.077096 | 0.137863 |
| FGR      | 0.071715 | 0.341463 | 0.4538   |
| FHAD1    | -0.04259 | 0.572444 | 0.67214  |
| FHDC1    | -0.06026 | 0.424302 | 0.536566 |
| FHIT     | 0.128009 | 0.088598 | 0.154438 |
| FHL1     | -0.32242 | 1.14E-05 | 7.28E-05 |
| FHL2     | 0.483588 | 8.05E-12 | 2.95E-10 |
| FHL3     | 0.340634 | 3.28E-06 | 2.46E-05 |
| FHL5     | -0.08272 | 0.272315 | 0.380333 |
| FHOD1    | 0.265899 | 0.000334 | 0.001344 |

|          |          |          |          |
|----------|----------|----------|----------|
| FHOD3    | 0.188833 | 0.011591 | 0.028017 |
| FH       | 0.018636 | 0.804978 | 0.86199  |
| FIBCD1   | 0.266467 | 0.000324 | 0.00131  |
| FIBIN    | 0.144566 | 0.054193 | 0.102705 |
| FIBP     | 0.283325 | 0.000127 | 0.000585 |
| FICD     | -0.46196 | 8.54E-11 | 2.44E-09 |
| FIG4     | -0.33606 | 4.52E-06 | 3.25E-05 |
| FIGF     | -0.36786 | 4.38E-07 | 4.24E-06 |
| FIGLA    | -0.15568 | 0.037983 | 0.076308 |
| FIGNL1   | -0.16505 | 0.027693 | 0.058498 |
| FIGNL2   | -0.17073 | 0.022698 | 0.04937  |
| FIGN     | -0.29607 | 6.00E-05 | 0.000306 |
| FILIP1L  | -0.06575 | 0.383187 | 0.496052 |
| FILIP1   | -0.22716 | 0.002294 | 0.007022 |
| FIP1L1   | 0.05263  | 0.485356 | 0.594305 |
| FIS1     | 0.017183 | 0.819919 | 0.872489 |
| FITM1    | -0.21364 | 0.004192 | 0.011782 |
| FITM2    | -0.45464 | 1.83E-10 | 4.80E-09 |
| FIZ1     | -0.10481 | 0.163816 | 0.253642 |
| FJX1     | 0.128213 | 0.088088 | 0.153765 |
| FKBP10   | 0.239728 | 0.001269 | 0.004219 |
| FKBP11   | -0.3012  | 4.40E-05 | 0.000235 |
| FKBP14   | -0.02999 | 0.691123 | 0.773723 |
| FKBP15   | -0.10808 | 0.150981 | 0.237567 |
| FKBP1AP1 | 0.024241 | 0.748067 | 0.819018 |
| FKBP1A   | 0.1787   | 0.017005 | 0.038714 |
| FKBP1B   | 0.386808 | 9.64E-08 | 1.13E-06 |
| FKBP2    | -0.06758 | 0.370124 | 0.483411 |
| FKBP3    | 0.018525 | 0.806119 | 0.862659 |
| FKBP4    | -0.05483 | 0.467315 | 0.577435 |
| FKBP5    | -0.18493 | 0.013465 | 0.031827 |
| FKBP6    | 0.035486 | 0.638171 | 0.729644 |
| FKBP7    | -0.02065 | 0.784378 | 0.847002 |
| FKBP8    | 0.10937  | 0.14615  | 0.231439 |
| FKBP9L   | -0.13744 | 0.067324 | 0.123116 |
| FKBP9    | 0.010861 | 0.885584 | 0.920444 |
| FKBPL    | 0.145253 | 0.053047 | 0.100831 |
| FKRP     | -0.21258 | 0.004387 | 0.012226 |
| FKSG29   | -0.02855 | 0.705233 | 0.785251 |
| FKSG83   | 0.004375 | 0.953785 | 0.968428 |
| FKTN     | -0.29776 | 5.42E-05 | 0.000281 |
| FLAD1    | 0.2444   | 0.00101  | 0.003462 |
| FLCN     | -0.37893 | 1.83E-07 | 1.99E-06 |
| FLG2     | -0.16791 | 0.02507  | 0.053768 |
| FLG      | -0.22649 | 0.002366 | 0.007209 |
| FLI1     | -0.14949 | 0.046413 | 0.090288 |
| FLII     | 0.242533 | 0.001107 | 0.003746 |
| FLJ10038 | -0.20818 | 0.005294 | 0.014378 |
| FLJ10213 | 0.035677 | 0.636369 | 0.72792  |
| FLJ10357 | -0.03788 | 0.615691 | 0.710598 |
| FLJ10661 | 0.083894 | 0.265552 | 0.372995 |
| FLJ11235 | -0.06258 | 0.406652 | 0.519019 |
| FLJ12825 | 0.342372 | 2.90E-06 | 2.21E-05 |
| FLJ13197 | -0.01875 | 0.803777 | 0.861571 |

FLJ13224 -0.27595 0.000193 0.000838  
FLJ14107 0.165688 0.027085 0.057405  
FLJ16779 0.43676 1.09E-09 2.28E-08  
FLJ22536 0.227605 0.002247 0.006902  
FLJ23867 0.563399 2.68E-16 2.95E-14  
FLJ25328 -0.01832 0.808222 0.864254  
FLJ25363 0.091964 0.222123 0.3242  
FLJ25758 -0.04571 0.54462 0.647428  
FLJ26850 -0.26995 0.000268 0.001115  
FLJ30679 -0.08816 0.241905 0.346375  
FLJ32063 -0.06845 0.363956 0.477246  
FLJ33360 -0.06059 0.421758 0.533989  
FLJ33630 -0.04866 0.518897 0.624612  
FLJ34503 -0.17518 0.019341 0.043147  
FLJ35024 -0.44501 4.86E-10 1.14E-08  
FLJ35220 0.394419 5.11E-08 6.49E-07  
FLJ35390 -0.38959 7.65E-08 9.25E-07  
FLJ35776 0.246716 0.000901 0.003141  
FLJ36000 -0.08976 0.233437 0.337327  
FLJ36031 0.182392 0.01482 0.03449  
FLJ36777 -0.39608 4.44E-08 5.73E-07  
FLJ37201 -0.20335 0.006482 0.017091  
FLJ37307 -0.07396 0.326541 0.438597  
FLJ37453 -0.3027 4.01E-05 0.000217  
FLJ37543 -0.27987 0.000155 0.000695  
FLJ39582 -0.15115 0.044006 0.086438  
FLJ39609 -0.08925 0.23612 0.340085  
FLJ39653 -0.05694 0.450285 0.56109  
FLJ39739 -0.04172 0.580295 0.67926  
FLJ40292 -0.00185 0.980397 0.986333  
FLJ40330 -0.22235 0.002854 0.008474  
FLJ40434 -0.12089 0.107976 0.181821  
FLJ40504 -0.16118 0.031603 0.065392  
FLJ40852 0.045722 0.544493 0.647393  
FLJ41941 -0.16841 0.024637 0.052993  
FLJ42289 -0.08135 0.280344 0.388746  
FLJ42393 0.183872 0.014016 0.032878  
FLJ42627 0.024582 0.744653 0.816002  
FLJ42709 0.261053 0.000432 0.001679  
FLJ42875 -0.00404 0.95732 0.970722  
FLJ43390 -0.18618 0.012839 0.030574  
FLJ43663 0.024796 0.742502 0.814458  
FLJ43859 0.067132 0.373278 0.486437  
FLJ43860 0.014759 0.844971 0.89069  
FLJ43950 -0.01295 0.863759 0.905657  
FLJ44054 -0.07259 0.335608 0.447764  
FLJ44606 0.102125 0.17495 0.267309  
FLJ44635 -0.1131 0.132794 0.214147  
FLJ45079 -0.04455 0.554914 0.656508  
FLJ45244 -0.06375 0.397895 0.510709  
FLJ45340 0.085783 0.254904 0.361277  
FLJ45445 0.0503 0.504913 0.611812  
FLJ45983 0.266894 0.000317 0.001286  
FLJ46111 0.264375 0.000362 0.001446



|          |          |          |          |
|----------|----------|----------|----------|
| FLJ46321 | -0.01362 | 0.856807 | 0.900144 |
| FLJ46361 | 0.024145 | 0.749038 | 0.819763 |
| FLJ90757 | -0.09882 | 0.189407 | 0.284875 |
| FLNA     | 0.196116 | 0.0087   | 0.021921 |
| FLNB     | 0.551044 | 1.59E-15 | 1.38E-13 |
| FLNC     | 0.166068 | 0.026731 | 0.0568   |
| FLOT1    | 0.152184 | 0.042569 | 0.084042 |
| FLOT2    | 0.317448 | 1.58E-05 | 9.65E-05 |
| FLRT1    | -0.09623 | 0.201327 | 0.299428 |
| FLRT2    | -0.06125 | 0.416653 | 0.529084 |
| FLRT3    | 0.317147 | 1.61E-05 | 9.80E-05 |
| FLT1     | -0.23693 | 0.001452 | 0.004736 |
| FLT3LG   | 0.22068  | 0.003076 | 0.009021 |
| FLT3     | -0.10429 | 0.165928 | 0.256294 |
| FLT4     | -0.1671  | 0.025785 | 0.055062 |
| FLVCR1   | -0.33622 | 4.47E-06 | 3.23E-05 |
| FLVCR2   | 0.248577 | 0.000821 | 0.002905 |
| FLYWCH1  | 0.007114 | 0.924914 | 0.948121 |
| FLYWCH2  | -0.01498 | 0.842711 | 0.888923 |
| FMN1     | 0.210254 | 0.004849 | 0.013351 |
| FMN2     | -0.33023 | 6.74E-06 | 4.61E-05 |
| FMNL1    | 0.060816 | 0.420003 | 0.532135 |
| FMNL2    | -0.1505  | 0.044938 | 0.087957 |
| FMNL3    | -0.09634 | 0.200813 | 0.298899 |
| FMO1     | 0.135058 | 0.072264 | 0.130671 |
| FMO2     | -0.01609 | 0.831236 | 0.880373 |
| FMO3     | 0.032089 | 0.670683 | 0.757747 |
| FMO4     | 0.210161 | 0.004868 | 0.013392 |
| FMO5     | 0.14612  | 0.051629 | 0.098648 |
| FMO6P    | -0.05342 | 0.478858 | 0.588462 |
| FMO9P    | 0.040522 | 0.591241 | 0.688787 |
| FMOD     | -0.01612 | 0.8309   | 0.880166 |
| FMR1NB   | -0.1049  | 0.163452 | 0.25324  |
| FMR1     | -0.15493 | 0.038929 | 0.077874 |
| FN1      | 0.220595 | 0.003087 | 0.009051 |
| FN3KRP   | 0.131585 | 0.079977 | 0.142154 |
| FN3K     | -0.22811 | 0.002195 | 0.006761 |
| FNBP1L   | -0.03991 | 0.596866 | 0.693935 |
| FNBP1    | -0.17785 | 0.017546 | 0.039738 |
| FNBP4    | 0.137625 | 0.066961 | 0.122522 |
| FNDC1    | 0.170435 | 0.022934 | 0.049817 |
| FNDC3A   | -0.44637 | 4.24E-10 | 1.00E-08 |
| FNDC3B   | 0.157263 | 0.036044 | 0.073065 |
| FNDC4    | 0.373865 | 2.74E-07 | 2.82E-06 |
| FNDC5    | -0.298   | 5.35E-05 | 0.000278 |
| FNDC7    | -0.09523 | 0.206078 | 0.305243 |
| FNDC8    | -0.07946 | 0.29172  | 0.401312 |
| FNIP1    | -0.18891 | 0.011558 | 0.027947 |
| FNIP2    | -0.21947 | 0.003246 | 0.009442 |
| FNTA     | 0.184502 | 0.013685 | 0.032257 |
| FNTB     | -0.08029 | 0.286704 | 0.395817 |
| FOLH1B   | -0.10153 | 0.177495 | 0.27017  |
| FOLH1    | -0.14083 | 0.060797 | 0.112842 |
| FOLR1    | 0.275036 | 0.000203 | 0.000876 |

|         |          |          |          |
|---------|----------|----------|----------|
| FOLR2   | -0.14595 | 0.05191  | 0.099069 |
| FOLR3   | 0.050903 | 0.499817 | 0.607088 |
| FOLR4   | -0.19256 | 0.01002  | 0.02474  |
| FOSB    | -0.09958 | 0.186008 | 0.280559 |
| FOSL1   | 0.458252 | 1.26E-10 | 3.46E-09 |
| FOSL2   | 0.221673 | 0.002942 | 0.008702 |
| FOS     | 0.194822 | 0.009162 | 0.022892 |
| FOXA1   | 0.248598 | 0.00082  | 0.002903 |
| FOXA2   | -0.2383  | 0.001359 | 0.004471 |
| FOXA3   | 0.187992 | 0.011974 | 0.028822 |
| FOXB1   | -0.28186 | 0.000138 | 0.00063  |
| FOXC1   | 0.394893 | 4.90E-08 | 6.28E-07 |
| FOXC2   | 0.159188 | 0.033802 | 0.069221 |
| FOXD1   | 0.409394 | 1.39E-08 | 2.10E-07 |
| FOXD2   | 0.337118 | 4.20E-06 | 3.04E-05 |
| FOXD3   | 0.039519 | 0.600462 | 0.69705  |
| FOXD4L1 | 0.076567 | 0.309713 | 0.420223 |
| FOXD4L2 | 0.175931 | 0.018822 | 0.042194 |
| FOXD4L3 | -0.01682 | 0.823633 | 0.875102 |
| FOXD4L5 | 0.202603 | 0.006684 | 0.017546 |
| FOXD4L6 | -0.02707 | 0.719854 | 0.796285 |
| FOXD4   | -0.00796 | 0.916062 | 0.941585 |
| FOX E1  | 0.044701 | 0.553526 | 0.655337 |
| FOX E3  | 0.116671 | 0.120921 | 0.198481 |
| FOX F1  | -0.01233 | 0.870192 | 0.910337 |
| FOX F2  | 0.320316 | 1.31E-05 | 8.19E-05 |
| FOX G1  | -0.05959 | 0.429478 | 0.541303 |
| FOX H1  | 0.355228 | 1.14E-06 | 9.73E-06 |
| FOX I1  | 0.129752 | 0.084308 | 0.148359 |
| FOX I2  | -0.09959 | 0.185944 | 0.280483 |
| FOX I3  | -0.05514 | 0.464752 | 0.574843 |
| FOX J1  | 0.030553 | 0.685586 | 0.769659 |
| FOX J2  | -0.10055 | 0.18172  | 0.27543  |
| FOX J3  | -0.32545 | 9.31E-06 | 6.10E-05 |
| FOX K1  | -0.41583 | 7.82E-09 | 1.28E-07 |
| FOX K2  | -0.22593 | 0.002427 | 0.007368 |
| FOX L1  | 0.591374 | 3.59E-18 | 6.66E-16 |
| FOX L2  | 0.108428 | 0.149677 | 0.235984 |
| FOX M1  | 0.219974 | 0.003174 | 0.009265 |
| FOX N1  | 0.141349 | 0.059835 | 0.111348 |
| FOX N2  | 0.060089 | 0.425589 | 0.537841 |
| FOX N3  | -0.31447 | 1.91E-05 | 0.000114 |
| FOX N4  | -0.27081 | 0.000256 | 0.00107  |
| FOX O1  | -0.11412 | 0.129328 | 0.209617 |
| FOX O3B | -0.24378 | 0.001041 | 0.003553 |
| FOX O3  | -0.19988 | 0.007474 | 0.019278 |
| FOX O4  | -0.14387 | 0.055376 | 0.104586 |
| FOX P1  | 0.062952 | 0.403835 | 0.516488 |
| FOX P2  | -0.31378 | 2.00E-05 | 0.000118 |
| FOX P3  | 0.034361 | 0.648864 | 0.738199 |
| FOX P4  | -0.33973 | 3.49E-06 | 2.60E-05 |
| FOX Q1  | 0.572586 | 6.80E-17 | 8.85E-15 |
| FOX R1  | 0.028666 | 0.704069 | 0.78422  |
| FOX R2  | 0.047656 | 0.527593 | 0.632625 |

|          |          |          |          |
|----------|----------|----------|----------|
| FOXRED1  | -0.00478 | 0.949464 | 0.965777 |
| FOXRED2  | -0.47406 | 2.32E-11 | 7.60E-10 |
| FOXSI    | 0.372666 | 3.01E-07 | 3.07E-06 |
| FPGS     | 0.386545 | 9.85E-08 | 1.15E-06 |
| FPGT     | -0.00513 | 0.945801 | 0.963554 |
| FPR1     | -0.01506 | 0.841824 | 0.888272 |
| FPR2     | -0.03048 | 0.686265 | 0.769919 |
| FPR3     | -0.03542 | 0.638834 | 0.730029 |
| FRAS1    | 0.116007 | 0.123066 | 0.20125  |
| FRAT1    | -0.11309 | 0.132831 | 0.214184 |
| FRAT2    | 0.174986 | 0.01948  | 0.043418 |
| FREM1    | -0.09363 | 0.21384  | 0.314525 |
| FREM2    | 0.103862 | 0.167692 | 0.258594 |
| FRG1B    | -0.18152 | 0.015314 | 0.035451 |
| FRG1     | 0.076336 | 0.311179 | 0.42189  |
| FRG2B    | -0.07371 | 0.328178 | 0.440108 |
| FRG2C    | 0.048864 | 0.517169 | 0.623234 |
| FRG2     | -0.07469 | 0.321754 | 0.433522 |
| FRK      | 0.119398 | 0.112416 | 0.18773  |
| FRMD1    | -0.05291 | 0.483029 | 0.592189 |
| FRMD3    | -0.11735 | 0.118769 | 0.195842 |
| FRMD4A   | -0.21021 | 0.004858 | 0.013371 |
| FRMD4B   | 0.236441 | 0.001486 | 0.004827 |
| FRMD5    | 0.371331 | 3.34E-07 | 3.36E-06 |
| FRMD6    | 0.244792 | 0.000991 | 0.003409 |
| FRMD7    | 0.134126 | 0.074273 | 0.133657 |
| FRMD8    | 0.333779 | 5.29E-06 | 3.74E-05 |
| FRMPD1   | -0.26034 | 0.000449 | 0.001733 |
| FRMPD2L1 | -0.00879 | 0.907307 | 0.935455 |
| FRMPD2   | -0.30365 | 3.78E-05 | 0.000206 |
| FRMPD4   | -0.20785 | 0.00537  | 0.014544 |
| FRRS1    | 0.344039 | 2.58E-06 | 1.98E-05 |
| FRS2     | -0.35195 | 1.45E-06 | 1.20E-05 |
| FRS3     | 0.101146 | 0.179145 | 0.272242 |
| FRYL     | -0.14258 | 0.057619 | 0.107996 |
| FRY      | -0.09921 | 0.187652 | 0.282715 |
| FRZB     | -0.12978 | 0.084244 | 0.148281 |
| FSCB     | 0.035204 | 0.640848 | 0.731957 |
| FSCN1    | 0.429707 | 2.16E-09 | 4.13E-08 |
| FSCN2    | 0.186425 | 0.012718 | 0.030317 |
| FSCN3    | -0.12728 | 0.090446 | 0.157036 |
| FSD1L    | -0.50429 | 7.15E-13 | 3.38E-11 |
| FSD1     | -0.16036 | 0.0325   | 0.066984 |
| FSD2     | -0.10179 | 0.17636  | 0.268877 |
| FSHB     | -0.24227 | 0.001121 | 0.003791 |
| FSHR     | -0.06298 | 0.40359  | 0.516209 |
| FSIP1    | -0.28621 | 0.000108 | 0.000506 |
| FSTL1    | 0.08673  | 0.249674 | 0.355072 |
| FSTL3    | 0.39688  | 4.14E-08 | 5.39E-07 |
| FSTL4    | -0.29065 | 8.30E-05 | 0.000404 |
| FSTL5    | -0.0675  | 0.370638 | 0.483858 |
| FST      | -0.10586 | 0.159606 | 0.248273 |
| FTCD     | -0.23579 | 0.001533 | 0.004962 |
| FTH1     | 0.27442  | 0.00021  | 0.000901 |

|          |          |          |          |
|----------|----------|----------|----------|
| FTHL17   | -0.11983 | 0.111113 | 0.186041 |
| FTHL3    | 0.196358 | 0.008616 | 0.021743 |
| FTL      | 0.186681 | 0.012594 | 0.030083 |
| FTO      | -0.3103  | 2.49E-05 | 0.000143 |
| FTSJ1    | 0.394612 | 5.02E-08 | 6.41E-07 |
| FTSJ2    | -0.11655 | 0.121308 | 0.198891 |
| FTSJ3    | 0.050391 | 0.504141 | 0.611138 |
| FTSJD1   | -0.03781 | 0.616352 | 0.711121 |
| FTSJD2   | -0.31536 | 1.81E-05 | 0.000108 |
| FUBP1    | -0.03    | 0.690956 | 0.77368  |
| FUBP3    | -0.29737 | 5.55E-05 | 0.000286 |
| FUCA1    | 0.089554 | 0.234532 | 0.338562 |
| FUCA2    | -0.09557 | 0.204427 | 0.30332  |
| FUK      | 0.064218 | 0.394427 | 0.507146 |
| FUNDC1   | 0.091047 | 0.22679  | 0.329386 |
| FUNDC2P2 | -0.21978 | 0.003202 | 0.009337 |
| FUNDC2   | -0.26674 | 0.000319 | 0.001294 |
| FURIN    | -0.17421 | 0.020037 | 0.044469 |
| FUS      | 0.030287 | 0.688179 | 0.771431 |
| FUT10    | 0.051338 | 0.49615  | 0.603696 |
| FUT11    | -0.13264 | 0.077561 | 0.138544 |
| FUT1     | -0.32407 | 1.02E-05 | 6.61E-05 |
| FUT2     | 0.532342 | 2.05E-14 | 1.41E-12 |
| FUT3     | 0.538712 | 8.73E-15 | 6.51E-13 |
| FUT4     | 0.30245  | 4.07E-05 | 0.00022  |
| FUT5     | 0.076534 | 0.309921 | 0.420385 |
| FUT6     | 0.411843 | 1.12E-08 | 1.74E-07 |
| FUT7     | -0.05922 | 0.432312 | 0.544146 |
| FUT8     | 0.143239 | 0.056465 | 0.106226 |
| FUT9     | 0.073862 | 0.327166 | 0.439082 |
| FUZ      | 0.173715 | 0.020396 | 0.045164 |
| FXC1     | -0.19322 | 0.009762 | 0.02419  |
| FXN      | -0.42049 | 5.10E-09 | 8.83E-08 |
| FXR1     | -0.01507 | 0.841773 | 0.888272 |
| FXR2     | -0.56479 | 2.18E-16 | 2.43E-14 |
| FXYD1    | -0.09168 | 0.22354  | 0.325715 |
| FXYD2    | -0.09025 | 0.230918 | 0.334396 |
| FXYD3    | 0.53113  | 2.40E-14 | 1.64E-12 |
| FXYD4    | 0.132149 | 0.078682 | 0.140218 |
| FXYD5    | 0.591154 | 3.72E-18 | 6.81E-16 |
| FXYD6    | -0.26773 | 0.000303 | 0.001236 |
| FXYD7    | -0.00854 | 0.909884 | 0.936988 |
| FYB      | -0.05573 | 0.460017 | 0.570449 |
| FYC01    | -0.19362 | 0.009608 | 0.023874 |
| FYN      | -0.2823  | 0.000135 | 0.000617 |
| FYTTD1   | -0.20186 | 0.006892 | 0.018018 |
| FZD10    | 0.034424 | 0.64827  | 0.737784 |
| FZD1     | -0.05702 | 0.449669 | 0.560675 |
| FZD2     | 0.459747 | 1.08E-10 | 3.00E-09 |
| FZD3     | -0.29032 | 8.46E-05 | 0.000411 |
| FZD4     | -0.28111 | 0.000144 | 0.000653 |
| FZD5     | 0.161814 | 0.030936 | 0.064277 |
| FZD6     | 0.148192 | 0.048369 | 0.093367 |
| FZD7     | 0.181863 | 0.015117 | 0.035073 |

|           |          |          |          |
|-----------|----------|----------|----------|
| FZD8      | 0.04751  | 0.528858 | 0.63354  |
| FZD9      | -0.24593 | 0.000936 | 0.003246 |
| FZR1      | 0.237119 | 0.001438 | 0.004698 |
| GOS2      | 0.328176 | 7.75E-06 | 5.20E-05 |
| G2E3      | -0.09417 | 0.211172 | 0.311435 |
| G3BP1     | -0.03665 | 0.627157 | 0.7203   |
| G3BP2     | -0.24295 | 0.001085 | 0.003683 |
| G6PC2     | -0.00586 | 0.938105 | 0.958116 |
| G6PC3     | -0.18951 | 0.01129  | 0.027396 |
| G6PC      | -0.00896 | 0.905503 | 0.934162 |
| G6PD      | 0.235571 | 0.001549 | 0.005008 |
| GAA       | -0.11227 | 0.135688 | 0.218049 |
| GAB1      | -0.12139 | 0.106498 | 0.179821 |
| GAB2      | -0.27801 | 0.000172 | 0.000759 |
| GAB3      | -0.09039 | 0.230183 | 0.333502 |
| GAB4      | -0.08832 | 0.241075 | 0.345461 |
| GABARAPL1 | -0.26184 | 0.000415 | 0.00162  |
| GABARAPL2 | -0.07914 | 0.293703 | 0.403507 |
| GABARAPL3 | -0.22113 | 0.003014 | 0.008888 |
| GABARAP   | -0.31664 | 1.66E-05 | 0.000101 |
| GABBR1    | 0.010946 | 0.8847   | 0.919946 |
| GABBR2    | -0.28627 | 0.000107 | 0.000505 |
| GABPA     | -0.25564 | 0.000573 | 0.002136 |
| GABPB1    | -0.10452 | 0.164993 | 0.255187 |
| GABPB2    | 0.154036 | 0.040083 | 0.079835 |
| GABRA1    | -0.26396 | 0.000371 | 0.001472 |
| GABRA2    | -0.16574 | 0.027036 | 0.057326 |
| GABRA3    | -0.07932 | 0.292603 | 0.402219 |
| GABRA4    | 0.034445 | 0.648062 | 0.737736 |
| GABRA5    | -0.2203  | 0.003128 | 0.009151 |
| GABRA6    | 0.05567  | 0.46047  | 0.57082  |
| GABRB1    | -0.2746  | 0.000208 | 0.000894 |
| GABRB2    | -0.08928 | 0.235955 | 0.339922 |
| GABRB3    | -0.37246 | 3.06E-07 | 3.11E-06 |
| GABRD     | 0.148419 | 0.048023 | 0.092879 |
| GABRE     | 0.284746 | 0.000117 | 0.000546 |
| GABRG1    | -0.20934 | 0.005041 | 0.01379  |
| GABRG2    | -0.27407 | 0.000214 | 0.000915 |
| GABRG3    | -0.26194 | 0.000412 | 0.001612 |
| GABRP     | 0.379609 | 1.73E-07 | 1.89E-06 |
| GABRQ     | -0.19747 | 0.008238 | 0.020936 |
| GABRR1    | -0.19697 | 0.008406 | 0.021303 |
| GABRR2    | -0.08258 | 0.273131 | 0.381177 |
| GABRR3    | -0.14815 | 0.048441 | 0.093477 |
| GAD1      | 0.137911 | 0.066391 | 0.121669 |
| GAD2      | -0.12066 | 0.108629 | 0.182656 |
| GADD45A   | 0.228963 | 0.002111 | 0.006537 |
| GADD45B   | -0.02327 | 0.757858 | 0.82699  |
| GADD45GIF | 0.25639  | 0.000551 | 0.002065 |
| GADD45G   | -0.31763 | 1.56E-05 | 9.55E-05 |
| GADL1     | -0.25085 | 0.000732 | 0.002632 |
| GAGE10    | -0.14751 | 0.049422 | 0.095083 |
| GAGE12D   | -0.10733 | 0.153871 | 0.241326 |
| GAGE12J   | -0.16089 | 0.031915 | 0.065944 |

|         |          |          |          |
|---------|----------|----------|----------|
| GAGE1   | -0.02566 | 0.733886 | 0.807696 |
| GAGE2A  | -0.06914 | 0.359121 | 0.472183 |
| GAGE2C  | -0.09288 | 0.217552 | 0.318893 |
| GAGE2D  | -0.11961 | 0.111778 | 0.186877 |
| GAGE4   | -0.08784 | 0.243651 | 0.34832  |
| GAGE8   | -0.16197 | 0.030776 | 0.064022 |
| GAK     | 0.158314 | 0.034805 | 0.070909 |
| GAL3ST1 | 0.234234 | 0.00165  | 0.005293 |
| GAL3ST2 | 0.045713 | 0.544579 | 0.647423 |
| GAL3ST3 | -0.05099 | 0.499116 | 0.606442 |
| GAL3ST4 | 0.147533 | 0.049387 | 0.095025 |
| GALC    | -0.05876 | 0.435939 | 0.547406 |
| GALE    | 0.485213 | 6.69E-12 | 2.53E-10 |
| GALK1   | 0.121066 | 0.107447 | 0.181089 |
| GALK2   | 0.08386  | 0.265746 | 0.373205 |
| GALM    | 0.329647 | 7.01E-06 | 4.76E-05 |
| GALNS   | 0.084899 | 0.259848 | 0.366389 |
| GALNT10 | 0.244134 | 0.001023 | 0.003502 |
| GALNT11 | -0.39366 | 5.44E-08 | 6.85E-07 |
| GALNT12 | 0.304772 | 3.53E-05 | 0.000194 |
| GALNT13 | -0.26257 | 0.000399 | 0.001568 |
| GALNT14 | 0.328553 | 7.55E-06 | 5.08E-05 |
| GALNT1  | -0.12341 | 0.100761 | 0.171645 |
| GALNT2  | 0.00175  | 0.981502 | 0.987193 |
| GALNT3  | 0.328686 | 7.48E-06 | 5.05E-05 |
| GALNT4  | 0.223178 | 0.002749 | 0.0082   |
| GALNT5  | 0.524995 | 5.36E-14 | 3.41E-12 |
| GALNT6  | 0.321535 | 1.21E-05 | 7.65E-05 |
| GALNT7  | 0.205972 | 0.005811 | 0.015556 |
| GALNT8  | -0.16858 | 0.024484 | 0.052717 |
| GALNT9  | 0.049766 | 0.509455 | 0.616007 |
| GALNTL1 | -0.25319 | 0.00065  | 0.002371 |
| GALNTL2 | -0.08816 | 0.241902 | 0.346375 |
| GALNTL4 | -0.09791 | 0.193549 | 0.289964 |
| GALNTL5 | -0.04207 | 0.577149 | 0.676334 |
| GALNTL6 | -0.20131 | 0.007049 | 0.018341 |
| GALP    | -0.0134  | 0.859064 | 0.901896 |
| GALR1   | -0.32751 | 8.10E-06 | 5.39E-05 |
| GALR2   | 0.074812 | 0.320964 | 0.432811 |
| GALR3   | -0.20801 | 0.005333 | 0.014469 |
| GALT    | -0.03746 | 0.619618 | 0.713911 |
| GAL     | 0.106155 | 0.158454 | 0.24687  |
| GAMT    | -0.22214 | 0.002881 | 0.008545 |
| GANAB   | -0.20708 | 0.005546 | 0.014941 |
| GANC    | 0.317451 | 1.58E-05 | 9.65E-05 |
| GAN     | 0.279345 | 0.000159 | 0.000713 |
| GAP43   | 0.010172 | 0.892806 | 0.925331 |
| GAPDHS  | -0.1091  | 0.147172 | 0.232721 |
| GAPDH   | 0.237941 | 0.001383 | 0.004542 |
| GAPT    | 0.038304 | 0.611713 | 0.707287 |
| GAPVD1  | -0.35722 | 9.84E-07 | 8.55E-06 |
| GAR1    | 0.232171 | 0.001818 | 0.005747 |
| GARNL3  | -0.2459  | 0.000938 | 0.003249 |
| GARS    | -0.08767 | 0.244583 | 0.349384 |

|         |          |          |          |
|---------|----------|----------|----------|
| GART    | 0.235613 | 0.001545 | 0.005    |
| GAS1    | 0.046173 | 0.540534 | 0.643693 |
| GAS2L1  | 0.174608 | 0.019749 | 0.043958 |
| GAS2L2  | 0.598131 | 1.19E-18 | 2.58E-16 |
| GAS2L3  | -0.12294 | 0.10207  | 0.173576 |
| GAS2    | -0.32499 | 9.59E-06 | 6.26E-05 |
| GAS5    | 0.261875 | 0.000414 | 0.001617 |
| GAS6    | 0.29909  | 5.00E-05 | 0.000263 |
| GAS7    | -0.11281 | 0.133807 | 0.215464 |
| GAS8    | -0.04091 | 0.587734 | 0.686108 |
| GAST    | -0.09019 | 0.231214 | 0.334726 |
| GATA1   | 0.031854 | 0.672958 | 0.759363 |
| GATA2   | -0.13598 | 0.070316 | 0.127774 |
| GATA3   | 0.346227 | 2.20E-06 | 1.73E-05 |
| GATA4   | 0.295306 | 6.29E-05 | 0.000318 |
| GATA5   | 0.124169 | 0.098669 | 0.168689 |
| GATA6   | 0.201193 | 0.007083 | 0.018409 |
| GATAD1  | 0.056638 | 0.452702 | 0.56364  |
| GATAD2A | 0.321848 | 1.18E-05 | 7.51E-05 |
| GATAD2B | -0.18691 | 0.012482 | 0.029853 |
| GATC    | -0.24101 | 0.001192 | 0.003997 |
| GATM    | -0.00961 | 0.898651 | 0.929269 |
| GATSL1  | -0.36083 | 7.50E-07 | 6.79E-06 |
| GATSL2  | -0.42018 | 5.25E-09 | 9.04E-08 |
| GATSL3  | 0.284306 | 0.00012  | 0.000558 |
| GATS    | -0.29579 | 6.11E-05 | 0.00031  |
| GBA2    | -0.09435 | 0.210295 | 0.310396 |
| GBA3    | -0.00635 | 0.932986 | 0.953923 |
| GBAP1   | 0.083098 | 0.27013  | 0.377922 |
| GBAS    | -0.34246 | 2.88E-06 | 2.20E-05 |
| GBA     | -0.09012 | 0.231549 | 0.335092 |
| GBE1    | -0.12405 | 0.09899  | 0.169123 |
| GBF1    | -0.23263 | 0.00178  | 0.005643 |
| GBGT1   | 0.157174 | 0.036151 | 0.073243 |
| GBP1    | 0.15663  | 0.036808 | 0.074375 |
| GBP2    | 0.423551 | 3.85E-09 | 6.92E-08 |
| GBP3    | 0.219451 | 0.003249 | 0.009448 |
| GBP4    | 0.152209 | 0.042534 | 0.083981 |
| GBP5    | -0.0063  | 0.933511 | 0.954311 |
| GBP6    | 0.243975 | 0.001031 | 0.003525 |
| GBP7    | -0.04124 | 0.584717 | 0.683223 |
| GBX1    | -0.27197 | 0.00024  | 0.001013 |
| GBX2    | -0.09193 | 0.222314 | 0.324382 |
| GCAT    | -0.17591 | 0.018839 | 0.042227 |
| GCA     | 0.111651 | 0.137875 | 0.220791 |
| GCC1    | -0.23209 | 0.001825 | 0.005764 |
| GCC2    | -0.05712 | 0.448823 | 0.559931 |
| GCDH    | -0.03139 | 0.677488 | 0.76295  |
| GCET2   | 0.142615 | 0.05756  | 0.107895 |
| GCFC1   | -0.12934 | 0.085307 | 0.149823 |
| GCGR    | 0.05147  | 0.495042 | 0.603079 |
| GCG     | 0.143642 | 0.055768 | 0.105176 |
| GCH1    | -0.42412 | 3.65E-09 | 6.60E-08 |
| GCHFR   | 0.270363 | 0.000262 | 0.001094 |

|          |          |          |          |
|----------|----------|----------|----------|
| GCKR     | 0.491109 | 3.40E-12 | 1.38E-10 |
| GCK      | -0.19795 | 0.008082 | 0.020624 |
| GCLC     | -0.28946 | 8.90E-05 | 0.00043  |
| GCLM     | -0.20551 | 0.005924 | 0.015812 |
| GCM1     | 0.101885 | 0.17597  | 0.268345 |
| GCM2     | -0.13996 | 0.062419 | 0.115515 |
| GCN1L1   | -0.23588 | 0.001526 | 0.004942 |
| GCNT1    | 0.012354 | 0.869994 | 0.910322 |
| GCNT2    | 0.29505  | 6.39E-05 | 0.000322 |
| GCNT3    | 0.426408 | 2.94E-09 | 5.45E-08 |
| GCNT4    | -0.2314  | 0.001885 | 0.00593  |
| GCNT7    | -0.02958 | 0.695065 | 0.776641 |
| GCOM1    | 0.325864 | 9.05E-06 | 5.95E-05 |
| GCSH     | 0.114683 | 0.12743  | 0.207119 |
| GC       | -0.15603 | 0.037548 | 0.075539 |
| GDAP1L1  | -0.24446 | 0.001007 | 0.003454 |
| GDAP1    | -0.42701 | 2.78E-09 | 5.19E-08 |
| GDAP2    | 0.159226 | 0.033759 | 0.06917  |
| GDA      | 0.273334 | 0.000223 | 0.000949 |
| GDE1     | 0.210524 | 0.004793 | 0.013218 |
| GDEP     | 0.033498 | 0.657122 | 0.745835 |
| GDF10    | -0.19543 | 0.008941 | 0.02241  |
| GDF11    | -0.32015 | 1.32E-05 | 8.27E-05 |
| GDF15    | 0.062417 | 0.407848 | 0.520073 |
| GDF1     | -0.21354 | 0.004209 | 0.011819 |
| GDF2     | 0.012004 | 0.873646 | 0.912646 |
| GDF3     | 0.139201 | 0.063865 | 0.117674 |
| GDF5     | 0.246862 | 0.000894 | 0.003123 |
| GDF6     | -0.02389 | 0.751622 | 0.821863 |
| GDF7     | -0.17275 | 0.021118 | 0.046491 |
| GDF9     | -0.2118  | 0.004538 | 0.012599 |
| GDI1     | -0.14392 | 0.055292 | 0.104467 |
| GDI2     | 0.026295 | 0.72753  | 0.802681 |
| GDNF     | -0.1119  | 0.13698  | 0.219679 |
| GDPD1    | -0.34758 | 2.00E-06 | 1.58E-05 |
| GDPD2    | 0.43586  | 1.19E-09 | 2.46E-08 |
| GDPD3    | 0.484056 | 7.63E-12 | 2.82E-10 |
| GDPD4    | -0.11056 | 0.141771 | 0.225769 |
| GDPD5    | 0.094377 | 0.210177 | 0.310245 |
| GEFT     | 0.026361 | 0.726881 | 0.802204 |
| GEMIN4   | -0.30462 | 3.56E-05 | 0.000195 |
| GEMIN5   | -0.25089 | 0.00073  | 0.002627 |
| GEMIN6   | 0.327295 | 8.22E-06 | 5.46E-05 |
| GEMIN7   | 0.185617 | 0.013117 | 0.031133 |
| GEMIN8P4 | -0.01653 | 0.826665 | 0.877192 |
| GEMIN8   | -0.03712 | 0.622781 | 0.716648 |
| GEM      | -0.02943 | 0.696552 | 0.777995 |
| GEN1     | 0.054549 | 0.469562 | 0.579596 |
| GET4     | 0.12529  | 0.095639 | 0.164406 |
| GFAP     | -0.07929 | 0.292744 | 0.402358 |
| GFER     | 0.124258 | 0.098425 | 0.168361 |
| GFI1B    | 0.15402  | 0.040105 | 0.079871 |
| GFI1     | -0.20218 | 0.006802 | 0.01781  |
| GFM1     | -0.07431 | 0.32426  | 0.436274 |



|        |          |          |          |
|--------|----------|----------|----------|
| GF2    | -0.35796 | 9.31E-07 | 8.14E-06 |
| GFOD1  | -0.00189 | 0.979976 | 0.986207 |
| GFOD2  | -0.31017 | 2.52E-05 | 0.000144 |
| GFPT1  | -0.04557 | 0.545803 | 0.648483 |
| GFPT2  | 0.107093 | 0.154784 | 0.242471 |
| GFRA1  | -0.24909 | 0.0008   | 0.002847 |
| GFRA2  | -0.2251  | 0.002521 | 0.007618 |
| GFRA3  | -0.13283 | 0.077147 | 0.137942 |
| GFRA4  | 0.100737 | 0.180918 | 0.274409 |
| GFRA5  | -0.0875  | 0.245495 | 0.35035  |
| GGA1   | 0.066102 | 0.380671 | 0.493488 |
| GGA2   | -0.44316 | 5.84E-10 | 1.33E-08 |
| GGA3   | 0.057853 | 0.443048 | 0.554834 |
| GGCT   | 0.114917 | 0.12665  | 0.206105 |
| GGCX   | 0.044413 | 0.556086 | 0.65754  |
| GGH    | -0.03928 | 0.60265  | 0.698907 |
| GGNBP1 | 0.033944 | 0.652853 | 0.741926 |
| GGNBP2 | 0.132399 | 0.078113 | 0.13938  |
| GGN    | 0.21566  | 0.003839 | 0.010927 |
| GGPS1  | 0.12476  | 0.097061 | 0.166475 |
| GGT1   | 0.206281 | 0.005736 | 0.015391 |
| GGT3P  | 0.179584 | 0.016458 | 0.037697 |
| GGT5   | 0.119539 | 0.111988 | 0.187158 |
| GGT6   | 0.295239 | 6.31E-05 | 0.00032  |
| GGT7   | -0.04792 | 0.525321 | 0.630705 |
| GGT8P  | 0.148358 | 0.048115 | 0.093021 |
| GGTA1  | -0.17434 | 0.019944 | 0.044342 |
| GGTLC1 | 0.152319 | 0.042384 | 0.08376  |
| GGTLC2 | 0.227709 | 0.002237 | 0.006876 |
| GH1    | -0.074   | 0.326277 | 0.438302 |
| GH2    | 0.022319 | 0.767448 | 0.83437  |
| GHDC   | 0.267894 | 0.0003   | 0.001228 |
| GHITM  | -0.12628 | 0.093033 | 0.160695 |
| GHRHR  | 0.006502 | 0.931356 | 0.9527   |
| GHRH   | -0.21281 | 0.004345 | 0.012134 |
| GHRLOS | 0.026929 | 0.721238 | 0.797504 |
| GHRL   | -0.04402 | 0.559618 | 0.660627 |
| GHR    | -0.36527 | 5.35E-07 | 5.05E-06 |
| GHSR   | -0.03409 | 0.651462 | 0.74043  |
| GIF    | -0.07096 | 0.346571 | 0.458985 |
| GIGYF1 | -0.08296 | 0.270911 | 0.378747 |
| GIGYF2 | -0.25381 | 0.000629 | 0.002308 |
| GIMAP1 | -0.15582 | 0.037808 | 0.076024 |
| GIMAP2 | 0.142332 | 0.058062 | 0.10863  |
| GIMAP4 | -0.15905 | 0.033957 | 0.069495 |
| GIMAP5 | -0.22956 | 0.002053 | 0.006374 |
| GIMAP6 | -0.30083 | 4.50E-05 | 0.00024  |
| GIMAP7 | -0.25715 | 0.00053  | 0.001998 |
| GIMAP8 | -0.27831 | 0.000169 | 0.000748 |
| GIN1   | -0.31806 | 1.52E-05 | 9.33E-05 |
| GIN5   | 0.253174 | 0.00065  | 0.002372 |
| GIN2   | 0.281224 | 0.000143 | 0.00065  |
| GIN3   | 0.151269 | 0.043845 | 0.086165 |
| GIN4   | 0.214929 | 0.003963 | 0.011238 |

|          |          |          |          |
|----------|----------|----------|----------|
| GIPC1    | 0.589682 | 4.71E-18 | 8.55E-16 |
| GIPC2    | 0.290036 | 8.60E-05 | 0.000417 |
| GIPC3    | -0.07891 | 0.295092 | 0.40497  |
| GIPR     | 0.000177 | 0.99813  | 0.998534 |
| GIP      | 0.009233 | 0.902646 | 0.931961 |
| GIT1     | 0.077862 | 0.301579 | 0.411668 |
| GIT2     | -0.28114 | 0.000144 | 0.000653 |
| GIYD2    | 0.366794 | 4.76E-07 | 4.55E-06 |
| GJA10    | 0.042259 | 0.575422 | 0.674846 |
| GJA1     | -0.03145 | 0.676854 | 0.762541 |
| GJA3     | -0.19681 | 0.008462 | 0.021425 |
| GJA4     | -0.05427 | 0.471858 | 0.581835 |
| GJA5     | -0.12778 | 0.089165 | 0.155261 |
| GJA8     | -0.19106 | 0.010628 | 0.026022 |
| GJA9     | 0.435769 | 1.21E-09 | 2.47E-08 |
| GJB1     | 0.293093 | 7.18E-05 | 0.000356 |
| GJB2     | 0.51807  | 1.30E-13 | 7.47E-12 |
| GJB3     | 0.633699 | 2.24E-21 | 1.03E-18 |
| GJB4     | 0.602487 | 5.74E-19 | 1.32E-16 |
| GJB5     | 0.493263 | 2.65E-12 | 1.12E-10 |
| GJB6     | 0.288675 | 9.31E-05 | 0.000446 |
| GJB7     | -0.25611 | 0.000559 | 0.002091 |
| GJC1     | -0.09538 | 0.205354 | 0.304464 |
| GJC2     | 0.401795 | 2.71E-08 | 3.74E-07 |
| GJC3     | -0.17005 | 0.023252 | 0.050449 |
| GJD2     | -0.16819 | 0.024822 | 0.053305 |
| GJD3     | -0.11522 | 0.125643 | 0.20487  |
| GJD4     | -0.06697 | 0.37446  | 0.487463 |
| GK2      | 0.011187 | 0.882179 | 0.918125 |
| GK3P     | -0.25476 | 0.0006   | 0.002216 |
| GK5      | 0.040525 | 0.591211 | 0.688787 |
| GKAP1    | -0.44787 | 3.65E-10 | 8.80E-09 |
| GKN1     | 0.259985 | 0.000457 | 0.00176  |
| GKN2     | 0.186213 | 0.012822 | 0.030542 |
| GK       | -0.28164 | 0.00014  | 0.000637 |
| GLA      | -0.0236  | 0.754483 | 0.824262 |
| GLB1L2   | 0.230487 | 0.001967 | 0.006148 |
| GLB1L3   | -0.2205  | 0.0031   | 0.009085 |
| GLB1L    | -0.18262 | 0.014692 | 0.034276 |
| GLB1     | -0.22181 | 0.002924 | 0.008655 |
| GLCCI1   | -0.45491 | 1.78E-10 | 4.70E-09 |
| GLCE     | -0.10484 | 0.163714 | 0.253564 |
| GLDC     | -0.10343 | 0.16949  | 0.260757 |
| GLDN     | 0.166987 | 0.02589  | 0.055256 |
| GLE1     | -0.18516 | 0.013346 | 0.031574 |
| GLG1     | -0.19462 | 0.009235 | 0.023058 |
| GLI1     | 0.248613 | 0.000819 | 0.002902 |
| GLI2     | 0.378185 | 1.94E-07 | 2.09E-06 |
| GLI3     | 0.017216 | 0.819572 | 0.87224  |
| GLI4     | 0.212456 | 0.004412 | 0.012285 |
| GLIPR1L1 | -0.01089 | 0.885328 | 0.920231 |
| GLIPR1L2 | -0.28721 | 0.000101 | 0.000481 |
| GLIPR1   | 0.057278 | 0.447597 | 0.558797 |
| GLIPR2   | 0.095662 | 0.20401  | 0.302837 |

|         |          |          |          |
|---------|----------|----------|----------|
| GLIS1   | 0.280017 | 0.000153 | 0.00069  |
| GLIS2   | 0.197038 | 0.008384 | 0.02126  |
| GLIS3   | -0.06866 | 0.362494 | 0.475707 |
| GLMN    | 0.033409 | 0.657971 | 0.746498 |
| GL01    | -0.08571 | 0.255303 | 0.361682 |
| GLOD4   | -0.15436 | 0.039665 | 0.079162 |
| GLOD5   | 0.287901 | 9.75E-05 | 0.000464 |
| GLP1R   | -0.14173 | 0.059134 | 0.110271 |
| GLP2R   | -0.14544 | 0.052744 | 0.100382 |
| GLRA1   | -0.19959 | 0.007561 | 0.019472 |
| GLRA2   | -0.25199 | 0.000691 | 0.002503 |
| GLRA3   | -0.27509 | 0.000202 | 0.000874 |
| GLRA4   | -0.09538 | 0.205367 | 0.304464 |
| GLRB    | -0.11997 | 0.110692 | 0.185463 |
| GLRX2   | 0.369841 | 3.76E-07 | 3.72E-06 |
| GLRX3   | 0.271877 | 0.000241 | 0.001016 |
| GLRX5   | -0.01577 | 0.834476 | 0.882688 |
| GLRX    | -0.0054  | 0.942976 | 0.96165  |
| GLS2    | -0.32783 | 7.93E-06 | 5.30E-05 |
| GLS     | -0.13965 | 0.063004 | 0.116314 |
| GLT1D1  | -0.16627 | 0.026543 | 0.056472 |
| GLT25D1 | 0.29887  | 5.07E-05 | 0.000266 |
| GLT25D2 | 0.067722 | 0.369081 | 0.482399 |
| GLT6D1  | 0.015279 | 0.839583 | 0.886712 |
| GLT8D1  | -0.20161 | 0.006964 | 0.018167 |
| GLT8D2  | 0.034398 | 0.648517 | 0.737932 |
| GLTPD1  | 0.351625 | 1.49E-06 | 1.22E-05 |
| GLTPD2  | 0.013676 | 0.856223 | 0.899726 |
| GLTP    | -0.03125 | 0.678838 | 0.763775 |
| GLTSCR1 | 0.066377 | 0.378687 | 0.491349 |
| GLTSCR2 | 0.096573 | 0.199713 | 0.297463 |
| GLUD1   | 0.297356 | 5.56E-05 | 0.000286 |
| GLUD2   | -0.08884 | 0.238306 | 0.34246  |
| GLUL    | -0.02556 | 0.734895 | 0.808356 |
| GLYATL1 | -0.11443 | 0.128286 | 0.208219 |
| GLYATL2 | -0.11673 | 0.120741 | 0.198284 |
| GLYATL3 | -0.24793 | 0.000848 | 0.002982 |
| GLYAT   | -0.22024 | 0.003137 | 0.009171 |
| GLYCTK  | -0.06744 | 0.371066 | 0.484198 |
| GLYR1   | -0.13468 | 0.073069 | 0.131782 |
| GM2A    | -0.014   | 0.852883 | 0.897166 |
| GMCL1L  | -0.26372 | 0.000375 | 0.001488 |
| GMCL1   | -0.18409 | 0.013903 | 0.032666 |
| GMDS    | 0.125688 | 0.094581 | 0.162884 |
| GMEB1   | -0.06133 | 0.416052 | 0.528422 |
| GMEB2   | -0.0705  | 0.349723 | 0.46223  |
| GMFB    | -0.15283 | 0.041689 | 0.082534 |
| GMFG    | 0.026122 | 0.729258 | 0.803944 |
| GMIP    | 0.327765 | 7.97E-06 | 5.31E-05 |
| GML     | 0.012967 | 0.863602 | 0.90555  |
| GMNN    | -0.05712 | 0.448832 | 0.559931 |
| GMPPA   | 0.163978 | 0.028731 | 0.060362 |
| GMPPB   | -0.09477 | 0.208286 | 0.307868 |
| GMPR2   | 0.169204 | 0.023954 | 0.051728 |

|         |          |          |          |
|---------|----------|----------|----------|
| GMPR    | -0.09765 | 0.19471  | 0.291328 |
| GMPS    | 0.25496  | 0.000594 | 0.002199 |
| GNA11   | -0.18847 | 0.011757 | 0.028341 |
| GNA12   | -0.42621 | 3.00E-09 | 5.54E-08 |
| GNA13   | -0.02055 | 0.785445 | 0.847969 |
| GNA14   | -0.18336 | 0.014289 | 0.033446 |
| GNA15   | 0.579133 | 2.49E-17 | 3.62E-15 |
| GNAI1   | -0.25319 | 0.00065  | 0.002371 |
| GNAI2   | 0.126141 | 0.09339  | 0.161184 |
| GNAI3   | 0.26564  | 0.000339 | 0.00136  |
| GNAL    | -0.31409 | 1.96E-05 | 0.000116 |
| GNAO1   | -0.34446 | 2.50E-06 | 1.93E-05 |
| GNAQ    | -0.1237  | 0.099947 | 0.170522 |
| GNASAS  | -0.03132 | 0.678158 | 0.763444 |
| GNAS    | -0.29725 | 5.60E-05 | 0.000288 |
| GNAT1   | -0.25599 | 0.000563 | 0.002103 |
| GNAT2   | -0.27768 | 0.000175 | 0.000772 |
| GNAT3   | 0.052674 | 0.484994 | 0.593971 |
| GNAZ    | -0.38487 | 1.13E-07 | 1.30E-06 |
| GNB1L   | 0.164258 | 0.028456 | 0.05986  |
| GNB1    | -0.0379  | 0.61546  | 0.710372 |
| GNB2L1  | 0.051096 | 0.49819  | 0.605631 |
| GNB2    | 0.20831  | 0.005266 | 0.014308 |
| GNB3    | -0.18041 | 0.015958 | 0.036734 |
| GNB4    | -0.04948 | 0.511904 | 0.618047 |
| GNB5    | -0.18721 | 0.012341 | 0.029554 |
| GNE     | -0.06982 | 0.354396 | 0.467376 |
| GNG10   | -0.19886 | 0.007789 | 0.019957 |
| GNG11   | -0.08942 | 0.235216 | 0.339153 |
| GNG12   | 0.167944 | 0.025039 | 0.053718 |
| GNG13   | 0.121845 | 0.105187 | 0.178019 |
| GNG2    | -0.40647 | 1.80E-08 | 2.62E-07 |
| GNG3    | -0.12435 | 0.098165 | 0.168003 |
| GNG4    | -0.36138 | 7.20E-07 | 6.55E-06 |
| GNG5    | 0.434164 | 1.41E-09 | 2.83E-08 |
| GNG7    | -0.24568 | 0.000948 | 0.00328  |
| GNG8    | 0.086436 | 0.251291 | 0.35715  |
| GNGT1   | 0.027204 | 0.718508 | 0.795375 |
| GNGT2   | 0.072972 | 0.333041 | 0.445301 |
| GNL1    | 0.029006 | 0.700724 | 0.781506 |
| GNL2    | 0.205647 | 0.00589  | 0.015732 |
| GNL3L   | -0.09223 | 0.22077  | 0.32263  |
| GNL3    | 0.152059 | 0.042741 | 0.084306 |
| GNLY    | -0.02189 | 0.771845 | 0.837532 |
| GNMT    | -0.17906 | 0.016779 | 0.038285 |
| GNPAT   | 0.209878 | 0.004927 | 0.013527 |
| GNPDA1  | 0.049694 | 0.510063 | 0.616616 |
| GNPDA2  | -0.35489 | 1.17E-06 | 9.94E-06 |
| GNPNAT1 | 0.062689 | 0.405801 | 0.51826  |
| GNPTAB  | -0.21466 | 0.00401  | 0.011348 |
| GNPTG   | 0.079363 | 0.292325 | 0.40195  |
| GNRH1   | 0.355156 | 1.15E-06 | 9.77E-06 |
| GNRH2   | -0.22659 | 0.002354 | 0.007179 |
| GNRHR2  | -0.02191 | 0.771608 | 0.83742  |

|           |          |          |          |
|-----------|----------|----------|----------|
| GNRHR     | -0.02834 | 0.707312 | 0.786902 |
| GNS       | -0.32164 | 1.20E-05 | 7.60E-05 |
| GOLGA1    | -0.2854  | 0.000113 | 0.000528 |
| GOLGA2B   | -0.10452 | 0.165013 | 0.255198 |
| GOLGA2    | -0.14882 | 0.047415 | 0.091946 |
| GOLGA3    | -0.33026 | 6.73E-06 | 4.60E-05 |
| GOLGA4    | -0.21545 | 0.003875 | 0.011012 |
| GOLGA5    | -0.07145 | 0.343266 | 0.455553 |
| GOLGA6A   | 0.141109 | 0.060276 | 0.112009 |
| GOLGA6B   | 0.096055 | 0.202146 | 0.300521 |
| GOLGA6C   | 0.020027 | 0.790747 | 0.852002 |
| GOLGA6D   | -0.03908 | 0.604482 | 0.700647 |
| GOLGA6L1C | 0.063439 | 0.400198 | 0.512766 |
| GOLGA6L1  | 0.028297 | 0.707706 | 0.787155 |
| GOLGA6L5  | 0.023767 | 0.752835 | 0.822836 |
| GOLGA6L6  | 0.032902 | 0.662845 | 0.751166 |
| GOLGA6L9  | 0.142678 | 0.057449 | 0.107726 |
| GOLGA7B   | -0.08288 | 0.271421 | 0.379325 |
| GOLGA7    | -0.06172 | 0.413142 | 0.525132 |
| GOLGA8A   | 0.104844 | 0.163688 | 0.253564 |
| GOLGA8B   | 0.03029  | 0.68815  | 0.771431 |
| GOLGA8C   | -0.29187 | 7.72E-05 | 0.000379 |
| GOLGA8DP  | -0.23078 | 0.001941 | 0.006075 |
| GOLGA8E   | -0.34646 | 2.17E-06 | 1.70E-05 |
| GOLGA8F   | 0.00274  | 0.971044 | 0.980465 |
| GOLGA8G   | -0.06107 | 0.418026 | 0.530351 |
| GOLGA9P   | -0.1999  | 0.007466 | 0.019261 |
| GOLGB1    | 0.014474 | 0.847932 | 0.89305  |
| GOLIM4    | -0.16241 | 0.030317 | 0.06323  |
| GOLM1     | 0.263746 | 0.000375 | 0.001486 |
| GOLPH3L   | 0.12889  | 0.086409 | 0.151419 |
| GOLPH3    | -0.33249 | 5.78E-06 | 4.04E-05 |
| GOLT1A    | 0.059124 | 0.433075 | 0.544795 |
| GOLT1B    | -0.19523 | 0.009016 | 0.022567 |
| GON4L     | 0.010468 | 0.889707 | 0.923375 |
| GOPC      | -0.25807 | 0.000505 | 0.001918 |
| GORAB     | 0.064409 | 0.393016 | 0.505752 |
| GORASP1   | 0.01051  | 0.88926  | 0.923124 |
| GORASP2   | 0.084858 | 0.260079 | 0.366662 |
| GOSR1     | -0.23718 | 0.001434 | 0.004686 |
| GOSR2     | -0.16464 | 0.028085 | 0.059205 |
| GOT1L1    | 0.016166 | 0.830414 | 0.879758 |
| GOT1      | -0.15108 | 0.044106 | 0.086583 |
| GOT2      | 0.036558 | 0.628049 | 0.720958 |
| GP1BA     | -0.13164 | 0.079848 | 0.141976 |
| GP2       | -0.05904 | 0.433704 | 0.545239 |
| GP5       | -0.095   | 0.20715  | 0.306469 |
| GP6       | 0.309314 | 2.66E-05 | 0.000151 |
| GP9       | -0.29395 | 6.82E-05 | 0.000342 |
| GPA33     | 0.262293 | 0.000405 | 0.001586 |
| GPAA1     | 0.003815 | 0.959694 | 0.972431 |
| GPAM      | -0.38583 | 1.04E-07 | 1.21E-06 |
| GPAT2     | 0.141192 | 0.060123 | 0.111809 |
| GPATCH1   | 0.157    | 0.03636  | 0.07359  |

|         |          |          |          |
|---------|----------|----------|----------|
| GPATCH2 | 0.129747 | 0.08432  | 0.148367 |
| GPATCH3 | -0.18462 | 0.013622 | 0.032148 |
| GPATCH4 | 0.101246 | 0.178714 | 0.271712 |
| GPATCH8 | -0.07472 | 0.321567 | 0.433358 |
| GPBAR1  | 0.027264 | 0.717915 | 0.795014 |
| GPBP1L1 | 0.139376 | 0.063528 | 0.117238 |
| GPBP1   | -0.13501 | 0.072369 | 0.130807 |
| GPC1    | 0.437461 | 1.02E-09 | 2.16E-08 |
| GPC2    | 0.002607 | 0.972449 | 0.981333 |
| GPC3    | -0.19424 | 0.009376 | 0.023368 |
| GPC4    | 0.189188 | 0.011433 | 0.027695 |
| GPC5    | -0.00485 | 0.948807 | 0.965307 |
| GPC6    | -0.20176 | 0.006921 | 0.018077 |
| GPCPD1  | 0.029264 | 0.698189 | 0.77936  |
| GPD1L   | 0.040917 | 0.58762  | 0.686048 |
| GPD1    | -0.08683 | 0.249148 | 0.35465  |
| GPD2    | 0.150758 | 0.044571 | 0.087336 |
| GPER    | 0.020902 | 0.781832 | 0.845083 |
| GPHA2   | -0.1442  | 0.054817 | 0.103698 |
| GPHN    | -0.23336 | 0.001719 | 0.00548  |
| GPIHBP1 | -0.16892 | 0.024195 | 0.052158 |
| GPI     | 0.187978 | 0.011981 | 0.028834 |
| GPKOW   | 0.199093 | 0.007716 | 0.019802 |
| GPLD1   | -0.49073 | 3.55E-12 | 1.43E-10 |
| GPM6A   | -0.07267 | 0.33503  | 0.447195 |
| GPM6B   | -0.26225 | 0.000406 | 0.001589 |
| GPN1    | 0.27047  | 0.000261 | 0.001089 |
| GPN2    | 0.012208 | 0.871515 | 0.911286 |
| GPN3    | -0.27301 | 0.000227 | 0.000964 |
| GPNMB   | 0.088871 | 0.238133 | 0.342286 |
| GPR107  | -0.26976 | 0.000271 | 0.001124 |
| GPR108  | 0.306537 | 3.16E-05 | 0.000177 |
| GPR109A | 0.151067 | 0.04413  | 0.086612 |
| GPR109B | 0.067625 | 0.369772 | 0.483078 |
| GPR110  | 0.571856 | 7.60E-17 | 9.69E-15 |
| GPR111  | 0.133377 | 0.075918 | 0.13609  |
| GPR112  | -0.17386 | 0.020287 | 0.044958 |
| GPR113  | -0.44226 | 6.38E-10 | 1.44E-08 |
| GPR114  | -0.14568 | 0.052352 | 0.099755 |
| GPR115  | 0.422129 | 4.39E-09 | 7.73E-08 |
| GPR116  | -0.25239 | 0.000677 | 0.002455 |
| GPR119  | -0.25034 | 0.000751 | 0.002694 |
| GPR120  | -0.02686 | 0.721962 | 0.797991 |
| GPR123  | -0.11881 | 0.114215 | 0.189965 |
| GPR124  | -0.05011 | 0.506505 | 0.613402 |
| GPR125  | 0.027087 | 0.71967  | 0.796215 |
| GPR126  | 0.393871 | 5.35E-08 | 6.75E-07 |
| GPR128  | 0.196473 | 0.008577 | 0.021662 |
| GPR12   | -0.13145 | 0.08029  | 0.142633 |
| GPR132  | 0.421678 | 4.57E-09 | 8.02E-08 |
| GPR133  | -0.21884 | 0.003337 | 0.009663 |
| GPR135  | -0.3703  | 3.63E-07 | 3.60E-06 |
| GPR137B | 0.113175 | 0.132547 | 0.213837 |
| GPR137C | -0.26774 | 0.000303 | 0.001236 |

|         |          |          |          |
|---------|----------|----------|----------|
| GPR137  | 0.141328 | 0.059874 | 0.111409 |
| GPR141  | -0.1017  | 0.176769 | 0.269356 |
| GPR142  | -0.40649 | 1.80E-08 | 2.62E-07 |
| GPR143  | 0.051586 | 0.494067 | 0.602324 |
| GPR144  | -0.08837 | 0.240807 | 0.345203 |
| GPR146  | -0.04325 | 0.566528 | 0.666778 |
| GPR148  | -0.44227 | 6.38E-10 | 1.44E-08 |
| GPR149  | -0.21927 | 0.003275 | 0.009511 |
| GPR150  | -0.21708 | 0.003608 | 0.010343 |
| GPR151  | -0.1457  | 0.052307 | 0.099703 |
| GPR152  | 0.291592 | 7.84E-05 | 0.000385 |
| GPR153  | 0.207922 | 0.005353 | 0.014512 |
| GPR155  | -0.40958 | 1.37E-08 | 2.06E-07 |
| GPR156  | -0.07577 | 0.314813 | 0.425911 |
| GPR157  | 0.092592 | 0.218969 | 0.320591 |
| GPR158  | -0.35554 | 1.11E-06 | 9.54E-06 |
| GPR15   | -0.15279 | 0.041744 | 0.082618 |
| GPR160  | 0.184514 | 0.013679 | 0.03225  |
| GPR161  | 0.176848 | 0.018203 | 0.040987 |
| GPR162  | -0.23025 | 0.001988 | 0.0062   |
| GPR171  | -0.08113 | 0.281681 | 0.390244 |
| GPR172A | 0.325555 | 9.24E-06 | 6.06E-05 |
| GPR172B | 0.156365 | 0.037132 | 0.07487  |
| GPR173  | -0.21743 | 0.003553 | 0.010197 |
| GPR174  | -0.19067 | 0.010792 | 0.026368 |
| GPR176  | -0.10839 | 0.149812 | 0.23614  |
| GPR179  | -0.29442 | 6.63E-05 | 0.000333 |
| GPR17   | -0.0441  | 0.558857 | 0.65983  |
| GPR180  | -0.06367 | 0.39849  | 0.511107 |
| GPR182  | -0.11508 | 0.126116 | 0.205455 |
| GPR183  | 0.073422 | 0.330061 | 0.442183 |
| GPR18   | -0.12539 | 0.095368 | 0.164055 |
| GPR19   | -0.26254 | 0.0004   | 0.001568 |
| GPR1    | 0.308818 | 2.74E-05 | 0.000156 |
| GPR20   | 0.385789 | 1.05E-07 | 1.21E-06 |
| GPR21   | 0.10005  | 0.183925 | 0.278032 |
| GPR22   | -0.08874 | 0.238835 | 0.342971 |
| GPR25   | 0.037671 | 0.617618 | 0.712115 |
| GPR26   | -0.01739 | 0.817787 | 0.870889 |
| GPR27   | -0.12403 | 0.099048 | 0.169207 |
| GPR31   | -0.15817 | 0.034974 | 0.071215 |
| GPR32   | 0.018104 | 0.810445 | 0.865835 |
| GPR34   | -0.19649 | 0.008573 | 0.02166  |
| GPR35   | 0.523677 | 6.36E-14 | 3.93E-12 |
| GPR37L1 | 0.265074 | 0.000349 | 0.001399 |
| GPR37   | -0.26439 | 0.000362 | 0.001445 |
| GPR39   | 0.530136 | 2.74E-14 | 1.85E-12 |
| GPR3    | -0.09381 | 0.212944 | 0.313463 |
| GPR44   | -0.24161 | 0.001158 | 0.0039   |
| GPR45   | -0.13532 | 0.071703 | 0.129864 |
| GPR4    | -0.0915  | 0.224457 | 0.326714 |
| GPR50   | -0.13124 | 0.080782 | 0.143379 |
| GPR52   | -0.04164 | 0.581014 | 0.679942 |
| GPR55   | -0.13931 | 0.063665 | 0.117446 |

|         |          |          |          |
|---------|----------|----------|----------|
| GPR56   | 0.233725 | 0.00169  | 0.005399 |
| GPR61   | -0.15287 | 0.041632 | 0.082438 |
| GPR62   | -0.12564 | 0.094717 | 0.16309  |
| GPR63   | -0.1351  | 0.072181 | 0.130562 |
| GPR64   | -0.2942  | 6.72E-05 | 0.000337 |
| GPR65   | -0.04477 | 0.552923 | 0.654857 |
| GPR68   | 0.145642 | 0.052407 | 0.099846 |
| GPR6    | -0.30279 | 3.99E-05 | 0.000216 |
| GPR75   | -0.4304  | 2.02E-09 | 3.89E-08 |
| GPR77   | 0.27139  | 0.000248 | 0.00104  |
| GPR78   | 0.334299 | 5.10E-06 | 3.62E-05 |
| GPR81   | 0.199603 | 0.007558 | 0.01947  |
| GPR82   | -0.01986 | 0.792476 | 0.853044 |
| GPR83   | -0.24909 | 0.0008   | 0.002847 |
| GPR84   | 0.121185 | 0.107099 | 0.180606 |
| GPR85   | -0.02671 | 0.723359 | 0.799179 |
| GPR87   | 0.533786 | 1.69E-14 | 1.19E-12 |
| GPR88   | -0.0367  | 0.626674 | 0.719958 |
| GPR89A  | 0.094442 | 0.209865 | 0.309877 |
| GPR89B  | 0.045355 | 0.547735 | 0.650192 |
| GPR89C  | 0.03039  | 0.687176 | 0.770569 |
| GPR97   | -0.01663 | 0.825591 | 0.876446 |
| GPR98   | -0.41972 | 5.48E-09 | 9.37E-08 |
| GPRASP1 | -0.32372 | 1.04E-05 | 6.75E-05 |
| GPRASP2 | -0.45787 | 1.31E-10 | 3.57E-09 |
| GPRC5A  | 0.611434 | 1.25E-19 | 3.38E-17 |
| GPRC5B  | 0.241073 | 0.001189 | 0.003986 |
| GPRC5C  | 0.121423 | 0.106408 | 0.179685 |
| GPRC5D  | 0.409359 | 1.40E-08 | 2.10E-07 |
| GPRC6A  | -0.15    | 0.04566  | 0.08913  |
| GPRIN1  | -0.09877 | 0.189619 | 0.28507  |
| GPRIN2  | 0.257479 | 0.000521 | 0.001968 |
| GPRIN3  | -0.47442 | 2.23E-11 | 7.34E-10 |
| GPS1    | -0.00562 | 0.940662 | 0.960076 |
| GPS2    | -0.22824 | 0.002182 | 0.006728 |
| GPSM1   | -0.02225 | 0.768144 | 0.834851 |
| GPSM2   | 0.263332 | 0.000383 | 0.001514 |
| GPSM3   | 0.111615 | 0.137999 | 0.220919 |
| GPT2    | -0.1114  | 0.138769 | 0.221971 |
| GPT     | 0.243006 | 0.001082 | 0.003674 |
| GPX1    | 0.454472 | 1.86E-10 | 4.87E-09 |
| GPX2    | 0.374008 | 2.71E-07 | 2.79E-06 |
| GPX3    | -0.3359  | 4.57E-06 | 3.28E-05 |
| GPX4    | 0.231687 | 0.00186  | 0.005862 |
| GPX5    | -0.11964 | 0.111674 | 0.186774 |
| GPX7    | -0.04462 | 0.554272 | 0.655945 |
| GPX8    | 0.312478 | 2.17E-05 | 0.000127 |
| GRAMD1A | 0.055245 | 0.463909 | 0.574087 |
| GRAMD1B | 0.080727 | 0.284083 | 0.392967 |
| GRAMD1C | -0.01757 | 0.815971 | 0.869719 |
| GRAMD2  | 0.193563 | 0.009632 | 0.023921 |
| GRAMD3  | 0.128121 | 0.088319 | 0.15406  |
| GRAMD4  | -0.2408  | 0.001204 | 0.004031 |
| GRAP2   | -0.30153 | 4.31E-05 | 0.000231 |



|         |          |          |          |
|---------|----------|----------|----------|
| GRAPL   | -0.11116 | 0.139612 | 0.223014 |
| GRAP    | -0.07494 | 0.320163 | 0.431949 |
| GRASP   | -0.08102 | 0.282336 | 0.391    |
| GRB10   | -0.17923 | 0.016676 | 0.038122 |
| GRB14   | -0.17822 | 0.017306 | 0.039299 |
| GRB2    | -0.10598 | 0.159147 | 0.247734 |
| GRB7    | 0.424759 | 3.44E-09 | 6.26E-08 |
| GREB1L  | 0.379866 | 1.70E-07 | 1.86E-06 |
| GREB1   | -0.07678 | 0.308359 | 0.418783 |
| GREM1   | 0.179535 | 0.016488 | 0.037756 |
| GREM2   | 0.107148 | 0.154571 | 0.242233 |
| GRHL1   | 0.280394 | 0.00015  | 0.000677 |
| GRHL2   | 0.402316 | 2.59E-08 | 3.60E-07 |
| GRHL3   | 0.163407 | 0.0293   | 0.061394 |
| GRHPR   | -0.00139 | 0.985266 | 0.989821 |
| GRIA1   | -0.34007 | 3.41E-06 | 2.55E-05 |
| GRIA2   | -0.31489 | 1.86E-05 | 0.000111 |
| GRIA3   | -0.3199  | 1.34E-05 | 8.39E-05 |
| GRIA4   | -0.05479 | 0.467642 | 0.577767 |
| GRID1   | -0.01897 | 0.801574 | 0.860308 |
| GRID2IP | 0.305351 | 3.40E-05 | 0.000188 |
| GRID2   | 0.027813 | 0.71248  | 0.790872 |
| GRIK1   | -0.24151 | 0.001164 | 0.003914 |
| GRIK2   | -0.23309 | 0.001742 | 0.00554  |
| GRIK3   | -0.11976 | 0.111337 | 0.186322 |
| GRIK4   | -0.24109 | 0.001188 | 0.003984 |
| GRIK5   | -0.25432 | 0.000613 | 0.002259 |
| GRIN1   | -0.16859 | 0.024479 | 0.052712 |
| GRIN2A  | -0.00261 | 0.972438 | 0.981333 |
| GRIN2B  | -0.00456 | 0.951871 | 0.96733  |
| GRIN2C  | -0.12035 | 0.109564 | 0.183915 |
| GRIN2D  | 0.174765 | 0.019637 | 0.043726 |
| GRIN3A  | -0.25115 | 0.000721 | 0.0026   |
| GRIN3B  | 0.164821 | 0.02791  | 0.058891 |
| GRINA   | 0.095014 | 0.207105 | 0.306442 |
| GRINL1A | -0.21366 | 0.004188 | 0.011775 |
| GRIP1   | 0.019218 | 0.799017 | 0.858496 |
| GRIP2   | -0.26838 | 0.000292 | 0.001201 |
| GRIPAP1 | 0.0018   | 0.980979 | 0.986818 |
| GRK1    | -0.21755 | 0.003533 | 0.010152 |
| GRK4    | -0.38373 | 1.24E-07 | 1.41E-06 |
| GRK5    | -0.1037  | 0.168337 | 0.259427 |
| GRK6    | -0.00534 | 0.943594 | 0.961999 |
| GRK7    | -0.07825 | 0.299136 | 0.409209 |
| GRLF1   | -0.44816 | 3.54E-10 | 8.62E-09 |
| GRM1    | -0.35207 | 1.44E-06 | 1.19E-05 |
| GRM2    | 0.082009 | 0.276478 | 0.384355 |
| GRM3    | -0.0236  | 0.754537 | 0.824275 |
| GRM4    | -0.21243 | 0.004417 | 0.012296 |
| GRM5    | 0.025891 | 0.731558 | 0.805959 |
| GRM6    | -0.09469 | 0.208666 | 0.308313 |
| GRM7    | -0.32804 | 7.82E-06 | 5.24E-05 |
| GRM8    | 0.051301 | 0.496461 | 0.603976 |
| GRN     | 0.270358 | 0.000262 | 0.001094 |

|         |          |          |          |
|---------|----------|----------|----------|
| GRPEL1  | 0.147036 | 0.050166 | 0.096234 |
| GRPEL2  | -0.13972 | 0.062865 | 0.116122 |
| GRPR    | -0.31161 | 2.30E-05 | 0.000133 |
| GRP     | 0.37214  | 3.14E-07 | 3.19E-06 |
| GRRP1   | -0.1839  | 0.014003 | 0.032855 |
| GRSF1   | -0.33181 | 6.05E-06 | 4.21E-05 |
| GRTP1   | 0.490194 | 3.78E-12 | 1.52E-10 |
| GRWD1   | 0.146801 | 0.050539 | 0.096837 |
| GRXCR2  | -0.10239 | 0.173832 | 0.266067 |
| GSC     | 0.239505 | 0.001282 | 0.004261 |
| GSDMA   | -0.04068 | 0.589764 | 0.68774  |
| GSDMB   | 0.614374 | 7.47E-20 | 2.11E-17 |
| GSDMC   | 0.250096 | 0.00076  | 0.002722 |
| GSDMD   | 0.339427 | 3.57E-06 | 2.65E-05 |
| GSG1L   | 0.043171 | 0.567202 | 0.667173 |
| GSG1    | -0.11622 | 0.12238  | 0.200342 |
| GSG2    | 0.150459 | 0.044999 | 0.088056 |
| GSK3A   | 0.096716 | 0.199045 | 0.29667  |
| GSK3B   | -0.02088 | 0.782055 | 0.845278 |
| GSN     | 0.176679 | 0.018316 | 0.041184 |
| GSPT1   | 0.003387 | 0.964213 | 0.975694 |
| GSPT2   | 0.136376 | 0.069501 | 0.126467 |
| GSR     | -0.11631 | 0.122099 | 0.199982 |
| GSS     | 0.316312 | 1.70E-05 | 0.000103 |
| GSTA1   | 0.168345 | 0.024689 | 0.053088 |
| GSTA2   | -0.0495  | 0.511704 | 0.617947 |
| GSTA3   | -0.13307 | 0.0766   | 0.137149 |
| GSTA4   | -0.48542 | 6.54E-12 | 2.49E-10 |
| GSTA5   | -0.04219 | 0.57605  | 0.675251 |
| GSTCD   | -0.26383 | 0.000373 | 0.00148  |
| GSTK1   | 0.396305 | 4.35E-08 | 5.64E-07 |
| GSTM1   | 0.144601 | 0.054135 | 0.102623 |
| GSTM2P1 | -0.0175  | 0.816608 | 0.870162 |
| GSTM2   | 0.00561  | 0.940753 | 0.960076 |
| GSTM3   | 0.126804 | 0.091667 | 0.158794 |
| GSTM4   | 0.201709 | 0.006934 | 0.018099 |
| GSTM5   | 0.073875 | 0.327081 | 0.439082 |
| GSTO1   | 0.364286 | 5.77E-07 | 5.38E-06 |
| GSTO2   | 0.239413 | 0.001288 | 0.004275 |
| GSTP1   | 0.581315 | 1.78E-17 | 2.64E-15 |
| GSTT1   | -0.01375 | 0.85541  | 0.899153 |
| GSTT2   | -0.12036 | 0.109521 | 0.183877 |
| GSTTP1  | 0.093524 | 0.214346 | 0.315104 |
| GSTTP2  | 0.02184  | 0.772298 | 0.8378   |
| GSTZ1   | -0.0252  | 0.738502 | 0.811285 |
| GSX2    | 0.092928 | 0.217294 | 0.31861  |
| GTDC1   | 0.26371  | 0.000376 | 0.001488 |
| GTF2A1L | 0.138025 | 0.066163 | 0.121308 |
| GTF2A1  | -0.22295 | 0.002778 | 0.008274 |
| GTF2A2  | -0.02242 | 0.766422 | 0.833544 |
| GTF2B   | 0.358368 | 9.03E-07 | 7.93E-06 |
| GTF2E1  | 0.089716 | 0.233683 | 0.337608 |
| GTF2E2  | 0.366335 | 4.93E-07 | 4.69E-06 |
| GTF2F1  | -0.02274 | 0.763164 | 0.831358 |

|           |          |          |          |
|-----------|----------|----------|----------|
| GTF2F2    | 0.407565 | 1.64E-08 | 2.40E-07 |
| GTF2H1    | -0.00453 | 0.952103 | 0.967515 |
| GTF2H2B   | -0.0877  | 0.244396 | 0.349158 |
| GTF2H2C   | -0.04436 | 0.556598 | 0.657967 |
| GTF2H2    | -0.07671 | 0.308795 | 0.419232 |
| GTF2H3    | -0.20463 | 0.006144 | 0.016315 |
| GTF2H4    | 0.152101 | 0.042683 | 0.084216 |
| GTF2H5    | -0.13487 | 0.072668 | 0.131228 |
| GTF2IP1   | -0.27051 | 0.00026  | 0.001086 |
| GTF2IRD1  | 0.477444 | 1.60E-11 | 5.44E-10 |
| GTF2IRD2E | -0.11826 | 0.115897 | 0.192144 |
| GTF2IRD2F | -0.17654 | 0.018407 | 0.041366 |
| GTF2IRD2  | -0.15993 | 0.032969 | 0.067817 |
| GTF2I     | -0.2405  | 0.001222 | 0.004082 |
| GTF3A     | 0.140022 | 0.062299 | 0.115314 |
| GTF3C1    | -0.28376 | 0.000124 | 0.000573 |
| GTF3C2    | 0.11293  | 0.133391 | 0.2149   |
| GTF3C3    | -0.01894 | 0.801839 | 0.860462 |
| GTF3C4    | -0.25849 | 0.000494 | 0.001883 |
| GTF3C5    | -0.04195 | 0.578194 | 0.677202 |
| GTF3C6    | -0.00059 | 0.99375  | 0.995701 |
| GTPBP10   | 0.059365 | 0.431195 | 0.543086 |
| GTPBP1    | 0.080525 | 0.28529  | 0.394195 |
| GTPBP2    | 0.264221 | 0.000365 | 0.001454 |
| GTPBP3    | 0.193305 | 0.00973  | 0.024123 |
| GTPBP4    | 0.093551 | 0.214214 | 0.314981 |
| GTPBP5    | -0.13975 | 0.062815 | 0.116053 |
| GTPBP8    | 0.079745 | 0.290002 | 0.39945  |
| GTSE1     | 0.303369 | 3.85E-05 | 0.000209 |
| GTSF1L    | 0.003724 | 0.96065  | 0.973083 |
| GTSF1     | 0.043746 | 0.562043 | 0.662879 |
| GUCA1A    | 0.182578 | 0.014717 | 0.034322 |
| GUCA1B    | 0.066859 | 0.375231 | 0.488275 |
| GUCA1C    | -0.17885 | 0.016914 | 0.03854  |
| GUCA2A    | -0.07457 | 0.322528 | 0.434328 |
| GUCA2B    | 0.053455 | 0.478532 | 0.588171 |
| GUCY1A2   | -0.14927 | 0.04674  | 0.090808 |
| GUCY1A3   | -0.09264 | 0.218744 | 0.320308 |
| GUCY1B2   | 0.376513 | 2.22E-07 | 2.35E-06 |
| GUCY1B3   | -0.12398 | 0.09919  | 0.169407 |
| GUCY2C    | -0.15659 | 0.036863 | 0.074471 |
| GUCY2D    | 0.033493 | 0.657171 | 0.745847 |
| GUCY2E    | 0.067466 | 0.370902 | 0.484075 |
| GUCY2F    | -0.04315 | 0.567349 | 0.667267 |
| GUCY2GP   | 0.170812 | 0.022629 | 0.049251 |
| GUF1      | -0.27427 | 0.000212 | 0.000907 |
| GUK1      | 0.479969 | 1.21E-11 | 4.23E-10 |
| GULP1     | 0.16288  | 0.029832 | 0.06239  |
| GUSBL1    | -0.16716 | 0.025731 | 0.054953 |
| GUSBL2    | -0.27801 | 0.000172 | 0.000759 |
| GUSBP1    | -0.27378 | 0.000217 | 0.000929 |
| GUSBP3    | -0.24876 | 0.000813 | 0.002886 |
| GUSB      | -0.12319 | 0.101371 | 0.172565 |
| GVIN1     | -0.14558 | 0.052516 | 0.100025 |

|         |          |          |          |
|---------|----------|----------|----------|
| GXYLT1  | -0.40976 | 1.35E-08 | 2.04E-07 |
| GXYLT2  | -0.04529 | 0.548346 | 0.650801 |
| GYG1    | -0.34557 | 2.31E-06 | 1.80E-05 |
| GYG2    | -0.35549 | 1.12E-06 | 9.58E-06 |
| GYLTL1B | -0.07331 | 0.330786 | 0.442764 |
| GYP A   | -0.12437 | 0.098122 | 0.167953 |
| GYPB    | -0.06182 | 0.412328 | 0.524366 |
| GYPC    | -0.03314 | 0.660511 | 0.748993 |
| GYPE    | -0.11893 | 0.113853 | 0.189506 |
| GYS1    | 0.292797 | 7.30E-05 | 0.000362 |
| GYS2    | -0.05496 | 0.466209 | 0.576346 |
| GZF1    | -0.47723 | 1.64E-11 | 5.55E-10 |
| GZMA    | -0.04624 | 0.539967 | 0.643173 |
| GZMB    | -0.0293  | 0.697794 | 0.779118 |
| GZMH    | -0.10773 | 0.152316 | 0.23925  |
| GZMK    | -0.05847 | 0.438227 | 0.549947 |
| GZMM    | -0.09397 | 0.212163 | 0.312476 |
| H19     | 0.134166 | 0.074185 | 0.133528 |
| H1F0    | 0.369318 | 3.91E-07 | 3.85E-06 |
| H1FNT   | -0.28896 | 9.16E-05 | 0.00044  |
| H1F00   | 0.121632 | 0.105801 | 0.178798 |
| H1FX    | 0.082583 | 0.273119 | 0.381177 |
| H2AFB1  | -0.03426 | 0.649807 | 0.738931 |
| H2AFJ   | 0.250466 | 0.000746 | 0.002679 |
| H2AFV   | -0.44006 | 7.93E-10 | 1.73E-08 |
| H2AFX   | 0.279125 | 0.000161 | 0.00072  |
| H2AFY2  | 0.04544  | 0.546981 | 0.649532 |
| H2AFY   | 0.16195  | 0.030793 | 0.064031 |
| H2AFZ   | 0.167849 | 0.025122 | 0.053849 |
| H2BFM   | -0.08048 | 0.285566 | 0.394514 |
| H2BFWT  | -0.04921 | 0.514212 | 0.620229 |
| H2BFXP  | -0.04655 | 0.537185 | 0.640592 |
| H3F3A   | 0.197381 | 0.008269 | 0.02101  |
| H3F3B   | 0.205826 | 0.005846 | 0.015641 |
| H3F3C   | 0.136694 | 0.068846 | 0.125494 |
| H6PD    | 0.008447 | 0.910899 | 0.937657 |
| HAAO    | -0.16321 | 0.029494 | 0.061748 |
| HABP2   | 0.017419 | 0.817482 | 0.870765 |
| HABP4   | -0.25315 | 0.000651 | 0.002373 |
| HACE1   | -0.38452 | 1.16E-07 | 1.33E-06 |
| HACL1   | -0.18109 | 0.015562 | 0.035924 |
| HADHA   | 0.038651 | 0.608491 | 0.704137 |
| HADHB   | -0.08202 | 0.276435 | 0.384323 |
| HADH    | -0.11117 | 0.139591 | 0.222998 |
| HAGHL   | 0.344623 | 2.47E-06 | 1.91E-05 |
| HAGH    | -0.22127 | 0.002996 | 0.00884  |
| HAL     | -0.00698 | 0.926371 | 0.948943 |
| HAMP    | 0.277449 | 0.000177 | 0.00078  |
| HAND1   | -0.05042 | 0.503905 | 0.610985 |
| HAND2   | 0.118782 | 0.114295 | 0.190049 |
| HA01    | -0.28526 | 0.000114 | 0.000532 |
| HA02    | -0.11751 | 0.118245 | 0.195128 |
| HAP1    | -0.17558 | 0.019066 | 0.042644 |
| HAPLN1  | 0.157527 | 0.035729 | 0.072537 |

|         |          |          |          |
|---------|----------|----------|----------|
| HAPLN2  | -0.07398 | 0.326412 | 0.438454 |
| HAPLN3  | 0.388881 | 8.12E-08 | 9.75E-07 |
| HAPLN4  | 0.238784 | 0.001328 | 0.004381 |
| HAR1A   | -0.17642 | 0.018488 | 0.041524 |
| HAR1B   | -0.20151 | 0.006991 | 0.018226 |
| HARBI1  | 0.116174 | 0.122523 | 0.200544 |
| HARS2   | 0.284754 | 0.000117 | 0.000546 |
| HARS    | -0.0217  | 0.773737 | 0.838993 |
| HAS1    | -0.18643 | 0.012713 | 0.030309 |
| HAS2AS  | -0.10416 | 0.16646  | 0.256954 |
| HAS2    | -0.03277 | 0.664122 | 0.75214  |
| HAS3    | 0.393064 | 5.72E-08 | 7.16E-07 |
| HAT1    | -0.10172 | 0.176694 | 0.269262 |
| HAUS1   | -0.18184 | 0.015129 | 0.035087 |
| HAUS2   | 0.050169 | 0.506026 | 0.612897 |
| HAUS3   | -0.27415 | 0.000213 | 0.000912 |
| HAUS4   | 0.1102   | 0.143096 | 0.227458 |
| HAUS5   | 0.10607  | 0.158787 | 0.247272 |
| HAUS6   | -0.30418 | 3.66E-05 | 0.0002   |
| HAUS7   | 0.029471 | 0.696163 | 0.777692 |
| HAUS8   | 0.249949 | 0.000766 | 0.00274  |
| HAVCR1  | 0.1439   | 0.055324 | 0.104508 |
| HAVCR2  | 0.148318 | 0.048176 | 0.093075 |
| HAX1    | -0.10137 | 0.178192 | 0.271023 |
| HBA1    | -0.11776 | 0.117476 | 0.19405  |
| HBA2    | -0.12006 | 0.110438 | 0.185132 |
| HBBP1   | 0.073594 | 0.328929 | 0.440876 |
| HBB     | -0.19802 | 0.008058 | 0.020571 |
| HBD     | 0.044339 | 0.556747 | 0.658046 |
| HBE1    | -0.0503  | 0.504955 | 0.611825 |
| HBEGF   | 0.368087 | 4.31E-07 | 4.17E-06 |
| HBG1    | -0.06874 | 0.361943 | 0.475141 |
| HBG2    | 0.018451 | 0.806874 | 0.863233 |
| HBM     | -0.11093 | 0.140441 | 0.22412  |
| HBP1    | -0.15515 | 0.038645 | 0.077399 |
| HBQ1    | -0.12029 | 0.109726 | 0.18414  |
| HBS1L   | -0.33602 | 4.53E-06 | 3.26E-05 |
| HBXIP   | 0.290091 | 8.57E-05 | 0.000416 |
| HBZ     | -0.07968 | 0.290382 | 0.399806 |
| HCCS    | 0.109531 | 0.145554 | 0.230624 |
| HCFC1R1 | 0.445497 | 4.63E-10 | 1.09E-08 |
| HCFC1   | -0.31906 | 1.42E-05 | 8.81E-05 |
| HCFC2   | -0.32075 | 1.27E-05 | 7.99E-05 |
| HCG11   | 0.013372 | 0.859388 | 0.90204  |
| HCG18   | -0.12105 | 0.107484 | 0.181119 |
| HCG22   | 0.027521 | 0.715365 | 0.792916 |
| HCG26   | 0.342196 | 2.94E-06 | 2.24E-05 |
| HCG27   | 0.162815 | 0.029899 | 0.0625   |
| HCG2P7  | -0.13406 | 0.074425 | 0.13387  |
| HCG4P6  | 0.055199 | 0.464277 | 0.574389 |
| HCG4    | 0.137021 | 0.068179 | 0.124438 |
| HCG9    | -0.22456 | 0.002583 | 0.007772 |
| HCK     | 0.067932 | 0.367601 | 0.481196 |
| HCLS1   | -0.06595 | 0.381747 | 0.494508 |

|          |          |          |          |
|----------|----------|----------|----------|
| HCN1     | -0.30916 | 2.68E-05 | 0.000153 |
| HCN2     | -0.21811 | 0.003447 | 0.009937 |
| HCN3     | 0.049658 | 0.510376 | 0.616805 |
| HCN4     | -0.24226 | 0.001122 | 0.003791 |
| HCP5     | 0.282528 | 0.000133 | 0.000609 |
| HCRTR1   | -0.09597 | 0.202529 | 0.301045 |
| HCRTR2   | -0.05642 | 0.454472 | 0.565523 |
| HCRT     | 0.089107 | 0.236882 | 0.340786 |
| HCST     | 0.094727 | 0.208485 | 0.308092 |
| HDAC10   | 0.17664  | 0.018342 | 0.041238 |
| HDAC11   | 0.101522 | 0.177524 | 0.270193 |
| HDAC1    | 0.237262 | 0.001429 | 0.004671 |
| HDAC2    | -0.19087 | 0.01071  | 0.026194 |
| HDAC3    | 0.009157 | 0.903439 | 0.932488 |
| HDAC4    | -0.47191 | 2.94E-11 | 9.48E-10 |
| HDAC5    | -0.30366 | 3.78E-05 | 0.000206 |
| HDAC6    | -0.17795 | 0.017481 | 0.039608 |
| HDAC7    | 0.401617 | 2.76E-08 | 3.78E-07 |
| HDAC8    | 0.033933 | 0.652953 | 0.741998 |
| HDAC9    | 0.034104 | 0.651321 | 0.740312 |
| HDC      | -0.1355  | 0.071332 | 0.129299 |
| HDDC2    | -0.08371 | 0.266621 | 0.374151 |
| HDDC3    | -0.00264 | 0.972142 | 0.981223 |
| HDGFL1   | 0.02061  | 0.784801 | 0.847412 |
| HDGFRP2  | 0.175689 | 0.018989 | 0.042505 |
| HDGFRP3  | -0.19167 | 0.010376 | 0.02548  |
| HDGF     | 0.34048  | 3.32E-06 | 2.48E-05 |
| HDHD1A   | 0.221004 | 0.003031 | 0.008922 |
| HDHD2    | -0.47661 | 1.76E-11 | 5.92E-10 |
| HDHD3    | 0.318599 | 1.46E-05 | 9.04E-05 |
| HDLBP    | 0.004176 | 0.955883 | 0.969811 |
| HDX      | -0.05027 | 0.505132 | 0.612002 |
| HEATR1   | 0.132538 | 0.077798 | 0.138855 |
| HEATR2   | -0.01455 | 0.847146 | 0.892507 |
| HEATR3   | -0.2111  | 0.004677 | 0.012935 |
| HEATR4   | -0.14226 | 0.058182 | 0.108814 |
| HEATR5A  | -0.20965 | 0.004974 | 0.013636 |
| HEATR5B  | -0.22597 | 0.002422 | 0.007355 |
| HEATR6   | -0.23898 | 0.001316 | 0.004346 |
| HEATR7A  | 0.138664 | 0.064907 | 0.119315 |
| HEATR7B2 | -0.15657 | 0.036886 | 0.07448  |
| HEBP1    | 0.26379  | 0.000374 | 0.001483 |
| HEBP2    | 0.370544 | 3.56E-07 | 3.54E-06 |
| HECA     | -0.04044 | 0.592015 | 0.689388 |
| HECTD1   | -0.08356 | 0.267457 | 0.375031 |
| HECTD2   | -0.30954 | 2.62E-05 | 0.000149 |
| HECTD3   | 0.262541 | 0.0004   | 0.001568 |
| HECW1    | 0.027587 | 0.714714 | 0.792416 |
| HECW2    | -0.41313 | 9.98E-09 | 1.57E-07 |
| HEG1     | -0.15342 | 0.040896 | 0.081211 |
| HELB     | -0.20222 | 0.00679  | 0.01779  |
| HELLS    | 0.3089   | 2.73E-05 | 0.000155 |
| HELQ     | -0.40041 | 3.06E-08 | 4.13E-07 |
| HELT     | 0.044719 | 0.553369 | 0.655189 |

|          |          |          |          |
|----------|----------|----------|----------|
| HELZ     | -0.39367 | 5.44E-08 | 6.84E-07 |
| HEMGN    | -0.21263 | 0.004379 | 0.012208 |
| HEMK1    | 0.037912 | 0.61537  | 0.710331 |
| HEPACAM2 | -0.23747 | 0.001415 | 0.004628 |
| HEPACAM  | -0.17355 | 0.020521 | 0.04539  |
| HEPHL1   | 0.158538 | 0.034545 | 0.070495 |
| HEPH     | 0.291452 | 7.91E-05 | 0.000387 |
| HEPN1    | -0.13645 | 0.06935  | 0.126249 |
| HERC1    | -0.48369 | 7.95E-12 | 2.92E-10 |
| HERC2P2  | 0.083812 | 0.266019 | 0.373492 |
| HERC2P4  | -0.06949 | 0.356677 | 0.469819 |
| HERC2    | -0.39353 | 5.50E-08 | 6.92E-07 |
| HERC3    | 0.019048 | 0.800759 | 0.859807 |
| HERC4    | 0.260166 | 0.000453 | 0.001746 |
| HERC5    | 0.024541 | 0.745064 | 0.816408 |
| HERC6    | 0.242101 | 0.001131 | 0.00382  |
| HERPUD1  | -0.31104 | 2.38E-05 | 0.000137 |
| HERPUD2  | -0.10605 | 0.158863 | 0.24737  |
| HES1     | 0.481284 | 1.04E-11 | 3.71E-10 |
| HES2     | 0.242812 | 0.001092 | 0.003704 |
| HES3     | -0.12123 | 0.106969 | 0.180432 |
| HES4     | 0.346119 | 2.22E-06 | 1.74E-05 |
| HES5     | 0.071282 | 0.344389 | 0.456737 |
| HES6     | -0.13048 | 0.08256  | 0.145972 |
| HES7     | 0.129689 | 0.08446  | 0.148587 |
| HESRG    | 0.080541 | 0.285195 | 0.394174 |
| HESX1    | 0.097231 | 0.196653 | 0.293658 |
| HEXA     | -0.08208 | 0.276063 | 0.383971 |
| HEXB     | -0.09239 | 0.219974 | 0.321705 |
| HEXDC    | -0.0558  | 0.459393 | 0.569961 |
| HEXIM1   | 0.326951 | 8.41E-06 | 5.57E-05 |
| HEXIM2   | 0.074254 | 0.324596 | 0.436667 |
| HEY1     | -0.32009 | 1.33E-05 | 8.30E-05 |
| HEY2     | -0.11747 | 0.118382 | 0.195318 |
| HEYL     | -0.02292 | 0.761346 | 0.829698 |
| HFE2     | 0.059112 | 0.433167 | 0.544812 |
| HFE      | 0.11819  | 0.116123 | 0.192329 |
| HFM1     | -0.31288 | 2.12E-05 | 0.000124 |
| HGC6.3   | -0.08795 | 0.243026 | 0.347653 |
| HGD      | 0.052072 | 0.490004 | 0.598551 |
| HGFAC    | 0.047631 | 0.527809 | 0.632808 |
| HGF      | -0.12464 | 0.097392 | 0.166941 |
| HGSNAT   | 0.063739 | 0.397968 | 0.510769 |
| HGS      | 0.281226 | 0.000143 | 0.00065  |
| HHATL    | -0.05016 | 0.506128 | 0.612983 |
| HHAT     | 0.023953 | 0.75096  | 0.82123  |
| HHEX     | -0.01729 | 0.818841 | 0.871706 |
| HHIPL1   | 0.164    | 0.02871  | 0.060331 |
| HHIPL2   | -0.12051 | 0.109091 | 0.183276 |
| HHIP     | 0.269436 | 0.000276 | 0.001142 |
| HHLA1    | -0.0981  | 0.192668 | 0.288842 |
| HHLA2    | 0.320425 | 1.30E-05 | 8.14E-05 |
| HHLA3    | 0.141324 | 0.05988  | 0.111411 |
| HIAT1    | -0.18146 | 0.015345 | 0.035509 |

|           |          |          |          |
|-----------|----------|----------|----------|
| HIATL1    | 0.023979 | 0.750705 | 0.821085 |
| HIATL2    | -0.01356 | 0.857448 | 0.900577 |
| HIBADH    | -0.09301 | 0.21688  | 0.318144 |
| HIBCH     | 0.124321 | 0.098252 | 0.168124 |
| HIC1      | 0.08291  | 0.271217 | 0.379067 |
| HIC2      | -0.32811 | 7.78E-06 | 5.22E-05 |
| HIF1AN    | -0.23923 | 0.0013   | 0.004307 |
| HIF1A     | -0.08478 | 0.260519 | 0.367151 |
| HIF3A     | 0.14183  | 0.058962 | 0.109993 |
| HIGD1A    | 0.152235 | 0.042499 | 0.083928 |
| HIGD1B    | -0.01707 | 0.821082 | 0.873257 |
| HIGD1C    | 0.058537 | 0.437664 | 0.549309 |
| HIGD2A    | 0.074682 | 0.321808 | 0.43355  |
| HIGD2B    | 0.031391 | 0.677443 | 0.762943 |
| HILS1     | 0.014106 | 0.851757 | 0.896362 |
| HINFP     | 0.101895 | 0.175929 | 0.268304 |
| HINT1     | -0.01815 | 0.809988 | 0.865534 |
| HINT2     | -0.07687 | 0.307792 | 0.418332 |
| HINT3     | -0.42848 | 2.42E-09 | 4.58E-08 |
| HIP1R     | -0.11259 | 0.134584 | 0.21661  |
| HIP1      | -0.00874 | 0.90781  | 0.93573  |
| HIPK1     | -0.17821 | 0.017314 | 0.039311 |
| HIPK2     | -0.54333 | 4.65E-15 | 3.67E-13 |
| HIPK3     | -0.21781 | 0.003493 | 0.010054 |
| HIPK4     | 0.085775 | 0.254946 | 0.361299 |
| HIRA      | -0.51077 | 3.24E-13 | 1.72E-11 |
| HIRIP3    | -0.34974 | 1.71E-06 | 1.38E-05 |
| HIST1H1A  | 0.112506 | 0.134866 | 0.216992 |
| HIST1H1B  | 0.141819 | 0.058982 | 0.110019 |
| HIST1H1C  | 0.376631 | 2.20E-07 | 2.33E-06 |
| HIST1H1D  | 0.18478  | 0.013541 | 0.031988 |
| HIST1H1E  | 0.071422 | 0.343443 | 0.455696 |
| HIST1H1T  | 0.156576 | 0.036873 | 0.074475 |
| HIST1H2AA | 0.024719 | 0.743278 | 0.815083 |
| HIST1H2AE | 0.065833 | 0.38262  | 0.495477 |
| HIST1H2AC | 0.351661 | 1.48E-06 | 1.22E-05 |
| HIST1H2AL | 0.148793 | 0.047457 | 0.092009 |
| HIST1H2AF | 0.063726 | 0.39807  | 0.510828 |
| HIST1H2AG | 0.224316 | 0.002611 | 0.007847 |
| HIST1H2AH | -0.03222 | 0.669378 | 0.756628 |
| HIST1H2AJ | 0.228374 | 0.002169 | 0.006695 |
| HIST1H2AK | -0.0304  | 0.687108 | 0.770537 |
| HIST1H2AL | 0.1733   | 0.020704 | 0.045706 |
| HIST1H2AM | 0.343132 | 2.75E-06 | 2.10E-05 |
| HIST1H2BA | -0.04735 | 0.530211 | 0.634687 |
| HIST1H2BE | -0.01363 | 0.856683 | 0.900061 |
| HIST1H2BC | 0.203521 | 0.006435 | 0.016979 |
| HIST1H2BI | 0.404462 | 2.15E-08 | 3.06E-07 |
| HIST1H2BF | 0.210047 | 0.004892 | 0.013447 |
| HIST1H2BG | 0.038327 | 0.611499 | 0.707122 |
| HIST1H2BH | 0.102209 | 0.174594 | 0.266946 |
| HIST1H2BI | 0.105883 | 0.159527 | 0.248189 |
| HIST1H2BJ | -0.08841 | 0.240589 | 0.344965 |
| HIST1H2BK | 0.307306 | 3.01E-05 | 0.000169 |



|           |          |          |          |
|-----------|----------|----------|----------|
| HIST1H2BF | 0.345746 | 2.28E-06 | 1.78E-05 |
| HIST1H2BL | 0.04234  | 0.574687 | 0.674253 |
| HIST1H2BM | 0.035908 | 0.634184 | 0.725925 |
| HIST1H2BN | 0.172195 | 0.02154  | 0.047201 |
| HIST1H2BC | 0.294946 | 6.43E-05 | 0.000324 |
| HIST1H3A  | -0.17203 | 0.021671 | 0.047461 |
| HIST1H3B  | 0.048063 | 0.524069 | 0.629506 |
| HIST1H3C  | 0.077274 | 0.30525  | 0.415493 |
| HIST1H3D  | 0.230737 | 0.001944 | 0.006083 |
| HIST1H3E  | 0.015906 | 0.833098 | 0.881653 |
| HIST1H3F  | 0.108138 | 0.150775 | 0.23728  |
| HIST1H3G  | 0.130807 | 0.081793 | 0.144887 |
| HIST1H3H  | 0.368722 | 4.10E-07 | 4.01E-06 |
| HIST1H3I  | 0.066198 | 0.379979 | 0.492767 |
| HIST1H3J  | 0.070529 | 0.349528 | 0.462157 |
| HIST1H4A  | -0.05314 | 0.481167 | 0.590533 |
| HIST1H4B  | -0.0577  | 0.444246 | 0.555893 |
| HIST1H4C  | -0.04324 | 0.566617 | 0.666813 |
| HIST1H4D  | 0.013094 | 0.862284 | 0.904367 |
| HIST1H4E  | 0.097677 | 0.194598 | 0.291204 |
| HIST1H4F  | 0.067012 | 0.374134 | 0.4872   |
| HIST1H4G  | 0.09228  | 0.220536 | 0.322336 |
| HIST1H4H  | 0.290745 | 8.25E-05 | 0.000402 |
| HIST1H4I  | 0.157594 | 0.035649 | 0.072412 |
| HIST1H4J  | 0.238123 | 0.001371 | 0.004506 |
| HIST1H4K  | 0.022717 | 0.763425 | 0.831551 |
| HIST1H4L  | -0.05918 | 0.432649 | 0.544398 |
| HIST2H2AA | 0.363004 | 6.36E-07 | 5.88E-06 |
| HIST2H2AE | 0.08942  | 0.235232 | 0.339153 |
| HIST2H2AC | 0.038214 | 0.612558 | 0.708098 |
| HIST2H2BA | 0.055823 | 0.459238 | 0.56984  |
| HIST2H2BE | 0.177666 | 0.017665 | 0.03999  |
| HIST2H2BF | 0.244727 | 0.000994 | 0.003419 |
| HIST2H3C  | 0.084524 | 0.261967 | 0.36885  |
| HIST2H3D  | 0.107734 | 0.152317 | 0.23925  |
| HIST2H4A  | 0.241709 | 0.001152 | 0.003884 |
| HIST3H2A  | 0.30966  | 2.60E-05 | 0.000149 |
| HIST3H2BE | 0.23945  | 0.001286 | 0.004269 |
| HIST3H3   | 0.172905 | 0.020999 | 0.046266 |
| HIST4H4   | -0.04226 | 0.575431 | 0.674846 |
| HIVEP1    | -0.21714 | 0.003598 | 0.010317 |
| HIVEP2    | -0.12912 | 0.085849 | 0.150614 |
| HIVEP3    | -0.11207 | 0.136406 | 0.218918 |
| HJURP     | 0.411614 | 1.14E-08 | 1.77E-07 |
| HK1       | 0.324667 | 9.80E-06 | 6.39E-05 |
| HK2       | 0.491347 | 3.31E-12 | 1.35E-10 |
| HK3       | 0.213569 | 0.004205 | 0.01181  |
| HKDC1     | 0.50357  | 7.80E-13 | 3.65E-11 |
| HKR1      | 0.016867 | 0.823171 | 0.874751 |
| HLA-A     | 0.245443 | 0.000959 | 0.003313 |
| HLA-B     | 0.328044 | 7.82E-06 | 5.24E-05 |
| HLA-C     | 0.221046 | 0.003026 | 0.008911 |
| HLA-DMA   | 0.191133 | 0.010598 | 0.025965 |
| HLA-DMB   | 0.083655 | 0.266919 | 0.374517 |

|          |          |          |          |
|----------|----------|----------|----------|
| HLA-DOA  | 0.004524 | 0.952214 | 0.967529 |
| HLA-DOB  | 0.108431 | 0.149665 | 0.235984 |
| HLA-DPA1 | -0.00178 | 0.981156 | 0.986895 |
| HLA-DPB1 | 0.041248 | 0.584599 | 0.683127 |
| HLA-DPB2 | 0.071985 | 0.339642 | 0.451866 |
| HLA-DQA1 | 0.003031 | 0.967968 | 0.978158 |
| HLA-DQA2 | 0.113112 | 0.13276  | 0.21411  |
| HLA-DQB1 | 0.064394 | 0.39313  | 0.505782 |
| HLA-DQB2 | 0.226317 | 0.002384 | 0.007252 |
| HLA-DRA  | 0.080124 | 0.287707 | 0.396952 |
| HLA-DRB1 | 0.083339 | 0.268737 | 0.376345 |
| HLA-DRB5 | 0.077425 | 0.304304 | 0.414729 |
| HLA-DRB6 | 0.094898 | 0.20766  | 0.307056 |
| HLA-E    | 0.132497 | 0.077891 | 0.139009 |
| HLA-F    | 0.360051 | 7.96E-07 | 7.13E-06 |
| HLA-G    | 0.187616 | 0.012149 | 0.029165 |
| HLA-H    | 0.178626 | 0.017052 | 0.038805 |
| HLA-J    | 0.225932 | 0.002426 | 0.007368 |
| HLA-L    | 0.21622  | 0.003746 | 0.0107   |
| HLCS     | -0.15343 | 0.04089  | 0.081211 |
| HLF      | -0.2822  | 0.000135 | 0.00062  |
| HLTF     | -0.44461 | 5.06E-10 | 1.18E-08 |
| HLX      | 0.127528 | 0.089815 | 0.156172 |
| HM13     | -0.06775 | 0.368873 | 0.482258 |
| HMBOX1   | -0.02025 | 0.788494 | 0.850054 |
| HMBS     | 0.263731 | 0.000375 | 0.001487 |
| HMCN1    | 0.004988 | 0.947313 | 0.964383 |
| HMG20A   | -0.10618 | 0.158353 | 0.24677  |
| HMG20B   | 0.305282 | 3.42E-05 | 0.000189 |
| HMGA1    | 0.493208 | 2.67E-12 | 1.12E-10 |
| HMGA2    | 0.322143 | 1.16E-05 | 7.40E-05 |
| HMGB1    | 0.243652 | 0.001048 | 0.003572 |
| HMGB2    | 0.196125 | 0.008697 | 0.021917 |
| HMGB3L1  | 0.096292 | 0.201034 | 0.299092 |
| HMGB3    | -0.14802 | 0.048635 | 0.093788 |
| HMGB4    | -0.10237 | 0.173916 | 0.266157 |
| HMGCLL1  | -0.20646 | 0.005693 | 0.015287 |
| HMGCL    | 0.144339 | 0.054577 | 0.103313 |
| HMGCR    | -0.02421 | 0.748372 | 0.819239 |
| HMGCS1   | 0.207837 | 0.005372 | 0.014548 |
| HMGCS2   | 0.116952 | 0.120022 | 0.197401 |
| HMGN1    | 0.247425 | 0.000869 | 0.003048 |
| HMGN2    | -0.28262 | 0.000132 | 0.000607 |
| HMGN3    | -0.21162 | 0.004573 | 0.012687 |
| HMGN4    | 0.191934 | 0.01027  | 0.02525  |
| HMGN5    | -0.19706 | 0.008377 | 0.021245 |
| HMGXB3   | -0.01812 | 0.810282 | 0.865754 |
| HMGXB4   | -0.00324 | 0.965783 | 0.976806 |
| HMHA1    | 0.234847 | 0.001603 | 0.005159 |
| HMHBI    | 0.051971 | 0.490852 | 0.599402 |
| HMMR     | 0.329293 | 7.18E-06 | 4.86E-05 |
| HMOX1    | 0.043568 | 0.563633 | 0.664319 |
| HMOX2    | 0.287464 | 1.00E-04 | 0.000475 |
| HMP19    | -0.17946 | 0.016534 | 0.037845 |

|           |          |          |          |
|-----------|----------|----------|----------|
| HMSD      | 0.197711 | 0.00816  | 0.020793 |
| HMX1      | -0.13379 | 0.074998 | 0.134771 |
| HMX2      | -0.01781 | 0.813435 | 0.867857 |
| HMX3      | -0.03969 | 0.598861 | 0.695639 |
| HN1L      | 0.179135 | 0.016734 | 0.038209 |
| HN1       | 0.63515  | 1.70E-21 | 8.21E-19 |
| HNF1A     | -0.06741 | 0.371321 | 0.484418 |
| HNF1B     | 0.329057 | 7.30E-06 | 4.94E-05 |
| HNF4A     | 0.112092 | 0.136314 | 0.218788 |
| HNF4G     | 0.197661 | 0.008177 | 0.02083  |
| HNMT      | 0.336162 | 4.48E-06 | 3.24E-05 |
| HNRNPA0   | -0.1452  | 0.053143 | 0.101004 |
| HNRNPA1L2 | -0.0983  | 0.191773 | 0.287652 |
| HNRNPA1   | -0.014   | 0.852878 | 0.897166 |
| HNRNPA2B1 | 0.10965  | 0.145116 | 0.23006  |
| HNRNPA3P1 | 0.151313 | 0.043782 | 0.086064 |
| HNRNPA3   | 0.094164 | 0.211216 | 0.311452 |
| HNRNPAB   | 0.305163 | 3.44E-05 | 0.00019  |
| HNRNPC    | 0.211545 | 0.004588 | 0.01272  |
| HNRNPD    | 0.328009 | 7.84E-06 | 5.24E-05 |
| HNRNPF    | 0.299458 | 4.89E-05 | 0.000257 |
| HNRNPH1   | -0.12507 | 0.096234 | 0.1653   |
| HNRNPH2   | -0.30693 | 3.09E-05 | 0.000173 |
| HNRNPH3   | -0.11933 | 0.112611 | 0.187944 |
| HNRNPK    | -0.12518 | 0.095925 | 0.164813 |
| HNRNPL    | 0.211259 | 0.004644 | 0.012854 |
| HNRNPM    | -0.0983  | 0.191742 | 0.287649 |
| HNRNPR    | -0.08797 | 0.242958 | 0.347605 |
| HNRNPUL1  | -0.09876 | 0.189687 | 0.285151 |
| HNRNPUL2  | 0.157262 | 0.036045 | 0.073065 |
| HNRNPU    | -0.01204 | 0.873261 | 0.912388 |
| HNRPDL    | 0.125654 | 0.094673 | 0.163028 |
| HNRPLL    | -0.07972 | 0.290131 | 0.399599 |
| HOMER1    | -0.22341 | 0.002721 | 0.008127 |
| HOMER2    | 0.031594 | 0.675475 | 0.761638 |
| HOMER3    | 0.434163 | 1.41E-09 | 2.83E-08 |
| HOMEZ     | 0.092793 | 0.217967 | 0.319383 |
| HOOK1     | -0.26015 | 0.000453 | 0.001747 |
| HOOK2     | 0.173567 | 0.020505 | 0.045367 |
| HOOK3     | 0.026015 | 0.730321 | 0.804846 |
| HOPX      | 0.263841 | 0.000373 | 0.00148  |
| HORMAD1   | -0.09758 | 0.195045 | 0.291763 |
| HORMAD2   | -0.10604 | 0.158919 | 0.247439 |
| HOTAIR    | 0.142859 | 0.05713  | 0.107201 |
| HOXA10    | 0.260071 | 0.000455 | 0.001753 |
| HOXA11AS  | 0.298339 | 5.24E-05 | 0.000273 |
| HOXA11    | 0.25683  | 0.000539 | 0.002028 |
| HOXA13    | 0.278038 | 0.000171 | 0.000759 |
| HOXA1     | 0.067561 | 0.370226 | 0.483479 |
| HOXA2     | 0.022332 | 0.767317 | 0.834294 |
| HOXA3     | 0.288931 | 9.18E-05 | 0.000441 |
| HOXA4     | 0.085685 | 0.255447 | 0.361808 |
| HOXA5     | -0.00349 | 0.963111 | 0.974894 |
| HOXA6     | 0.083416 | 0.268297 | 0.375864 |

|         |          |          |          |
|---------|----------|----------|----------|
| HOXA7   | -0.04885 | 0.517291 | 0.623234 |
| HOXA9   | 0.179246 | 0.016665 | 0.038106 |
| HOXB13  | 0.088296 | 0.241192 | 0.345554 |
| HOXB1   | 0.107909 | 0.151649 | 0.238446 |
| HOXB2   | 0.193397 | 0.009695 | 0.024057 |
| HOXB3   | 0.349963 | 1.68E-06 | 1.36E-05 |
| HOXB4   | 0.146917 | 0.050354 | 0.096557 |
| HOXB5   | 0.459949 | 1.05E-10 | 2.94E-09 |
| HOXB6   | 0.435163 | 1.28E-09 | 2.61E-08 |
| HOXB7   | 0.39502  | 4.85E-08 | 6.23E-07 |
| HOXB8   | 0.261767 | 0.000416 | 0.001625 |
| HOXB9   | 0.330727 | 6.52E-06 | 4.48E-05 |
| HOXC10  | 0.015773 | 0.834477 | 0.882688 |
| HOXC11  | 0.161183 | 0.031605 | 0.065392 |
| HOXC12  | 0.010802 | 0.88621  | 0.920835 |
| HOXC13  | -0.14947 | 0.046446 | 0.090334 |
| HOXC4   | 0.397954 | 3.78E-08 | 4.96E-07 |
| HOXC5   | 0.406188 | 1.85E-08 | 2.68E-07 |
| HOXC6   | 0.266661 | 0.000321 | 0.001299 |
| HOXC8   | 0.245421 | 0.00096  | 0.003316 |
| HOXC9   | 0.228344 | 0.002172 | 0.006702 |
| HOXD10  | 0.116574 | 0.121232 | 0.198815 |
| HOXD11  | 0.142358 | 0.058016 | 0.108565 |
| HOXD12  | 0.066276 | 0.379415 | 0.4921   |
| HOXD13  | 0.012411 | 0.869393 | 0.909971 |
| HOXD1   | -0.18577 | 0.013038 | 0.030961 |
| HOXD3   | -0.04412 | 0.55868  | 0.65969  |
| HOXD4   | 0.078724 | 0.296238 | 0.406232 |
| HOXD8   | -0.06373 | 0.398049 | 0.510828 |
| HOXD9   | 0.053669 | 0.476773 | 0.586373 |
| HP1BP3  | -0.02847 | 0.706003 | 0.785887 |
| HPCAL1  | 0.359832 | 8.09E-07 | 7.23E-06 |
| HPCAL4  | -0.29466 | 6.54E-05 | 0.000329 |
| HPCA    | -0.25426 | 0.000615 | 0.002264 |
| HPDL    | 0.416478 | 7.37E-09 | 1.21E-07 |
| HPD     | -0.24461 | 0.001    | 0.003434 |
| HPGDS   | 0.248417 | 0.000827 | 0.002923 |
| HPGD    | 0.313849 | 1.99E-05 | 0.000118 |
| HPN     | -0.20239 | 0.006742 | 0.017685 |
| HPRT1   | 0.062862 | 0.404508 | 0.517116 |
| HPR     | -0.12857 | 0.087189 | 0.152533 |
| HPS1    | 0.298622 | 5.15E-05 | 0.000269 |
| HPS3    | 0.093633 | 0.21381  | 0.314504 |
| HPS4    | 0.099159 | 0.187882 | 0.282932 |
| HPS5    | -0.11783 | 0.117253 | 0.193762 |
| HPS6    | -0.00376 | 0.960268 | 0.972863 |
| HPSE2   | -0.02561 | 0.734362 | 0.808067 |
| HPSE    | 0.055019 | 0.465738 | 0.575918 |
| HPVC1   | 0.060048 | 0.425904 | 0.538108 |
| HPX     | -0.00372 | 0.960642 | 0.973083 |
| HPYR1   | -0.08849 | 0.240136 | 0.34444  |
| HP      | 0.093708 | 0.213445 | 0.314084 |
| HRASLS2 | 0.60151  | 6.77E-19 | 1.52E-16 |
| HRASLS5 | 0.050411 | 0.50397  | 0.611006 |

|           |          |          |          |
|-----------|----------|----------|----------|
| HRASLS    | -0.42908 | 2.29E-09 | 4.36E-08 |
| HRAS      | 0.103661 | 0.168519 | 0.25962  |
| HRCT1     | 0.10201  | 0.175439 | 0.267825 |
| HRC       | -0.08058 | 0.284942 | 0.393934 |
| HRG       | 0.08373  | 0.266489 | 0.373992 |
| HRH1      | 0.449877 | 2.98E-10 | 7.43E-09 |
| HRH2      | -0.20938 | 0.005031 | 0.013768 |
| HRH3      | -0.27625 | 0.00019  | 0.000827 |
| HRH4      | -0.03082 | 0.682947 | 0.767481 |
| HRK       | 0.146843 | 0.050472 | 0.096745 |
| HRNBP3    | -0.10584 | 0.159715 | 0.248403 |
| HRNR      | -0.20305 | 0.006561 | 0.017279 |
| HRSP12    | -0.07483 | 0.320819 | 0.432697 |
| HR        | 0.291382 | 7.94E-05 | 0.000389 |
| HS1BP3    | 0.181143 | 0.01553  | 0.035858 |
| HS2ST1    | -0.17659 | 0.018374 | 0.041296 |
| HS3ST1    | 0.564637 | 2.23E-16 | 2.47E-14 |
| HS3ST2    | 0.117682 | 0.117712 | 0.194375 |
| HS3ST3A1  | 0.051772 | 0.492512 | 0.601058 |
| HS3ST3B1  | -0.28312 | 0.000128 | 0.000592 |
| HS3ST4    | -0.22565 | 0.002458 | 0.007451 |
| HS3ST5    | 0.111742 | 0.137552 | 0.220435 |
| HS3ST6    | -0.18673 | 0.012572 | 0.030038 |
| HS6ST1    | -0.10992 | 0.144106 | 0.228695 |
| HS6ST2    | -0.18522 | 0.013317 | 0.031515 |
| HS6ST3    | -0.26972 | 0.000272 | 0.001126 |
| HSBP1L1   | 0.405749 | 1.92E-08 | 2.77E-07 |
| HSBP1     | 0.092689 | 0.218487 | 0.320074 |
| HSCB      | -0.08266 | 0.272679 | 0.380707 |
| HSD11B1L  | 0.091313 | 0.225431 | 0.327818 |
| HSD11B1   | -0.00254 | 0.973122 | 0.981761 |
| HSD11B2   | 0.381361 | 1.50E-07 | 1.67E-06 |
| HSD17B10  | -0.06473 | 0.390653 | 0.503308 |
| HSD17B11  | 0.341389 | 3.11E-06 | 2.34E-05 |
| HSD17B12  | 0.017723 | 0.814354 | 0.868557 |
| HSD17B13  | -0.01309 | 0.862361 | 0.904393 |
| HSD17B14  | -0.1623  | 0.030428 | 0.063422 |
| HSD17B1   | -0.10092 | 0.180119 | 0.27347  |
| HSD17B2   | 0.466807 | 5.10E-11 | 1.56E-09 |
| HSD17B3   | -0.11792 | 0.116958 | 0.19341  |
| HSD17B4   | -0.15758 | 0.035669 | 0.072444 |
| HSD17B6   | 0.234867 | 0.001601 | 0.005155 |
| HSD17B7P2 | 0.190813 | 0.010732 | 0.026235 |
| HSD17B7   | 0.110894 | 0.140581 | 0.22429  |
| HSD17B8   | 0.228037 | 0.002203 | 0.006782 |
| HSD3B1    | 0.005142 | 0.945691 | 0.963525 |
| HSD3B2    | 0.022415 | 0.766478 | 0.833544 |
| HSD3B7    | 0.327628 | 8.04E-06 | 5.36E-05 |
| HSDL1     | -0.21183 | 0.004533 | 0.012588 |
| HSDL2     | -0.24824 | 0.000835 | 0.002944 |
| HSF1      | 0.246854 | 0.000894 | 0.003124 |
| HSF2BP    | 0.210153 | 0.004869 | 0.013394 |
| HSF2      | -0.45575 | 1.63E-10 | 4.34E-09 |
| HSF4      | 0.135941 | 0.070404 | 0.127897 |

|           |          |          |          |
|-----------|----------|----------|----------|
| HSF5      | -0.25929 | 0.000474 | 0.001815 |
| HSFX2     | -0.20995 | 0.004911 | 0.01349  |
| HSFY2     | -0.02166 | 0.774089 | 0.839097 |
| HSH2D     | 0.489387 | 4.15E-12 | 1.65E-10 |
| HSN2      | 0.05592  | 0.458455 | 0.569047 |
| HSP90AA1  | -0.02635 | 0.727025 | 0.802287 |
| HSP90AB1  | -0.16263 | 0.030089 | 0.062822 |
| HSP90AB2F | -0.21139 | 0.004618 | 0.012792 |
| HSP90AB4F | 0.163929 | 0.028779 | 0.060457 |
| HSP90B1   | -0.31265 | 2.15E-05 | 0.000126 |
| HSP90B3P  | -0.34733 | 2.03E-06 | 1.61E-05 |
| HSPA12A   | -0.03791 | 0.615388 | 0.710331 |
| HSPA12B   | -0.04898 | 0.516193 | 0.622391 |
| HSPA13    | -0.36241 | 6.65E-07 | 6.12E-06 |
| HSPA14    | -0.07524 | 0.318165 | 0.429916 |
| HSPA1A    | 0.149599 | 0.046254 | 0.090021 |
| HSPA1B    | 0.140601 | 0.061214 | 0.113518 |
| HSPA1L    | -0.33143 | 6.21E-06 | 4.31E-05 |
| HSPA2     | -0.05036 | 0.504446 | 0.611395 |
| HSPA4L    | -0.33043 | 6.65E-06 | 4.56E-05 |
| HSPA4     | -0.02032 | 0.787723 | 0.849408 |
| HSPA5     | -0.1057  | 0.160257 | 0.249149 |
| HSPA6     | 0.168554 | 0.024509 | 0.052763 |
| HSPA7     | 0.254427 | 0.00061  | 0.00225  |
| HSPA8     | -0.228   | 0.002206 | 0.00679  |
| HSPA9     | -0.21444 | 0.004049 | 0.011449 |
| HSPB11    | 0.292533 | 7.42E-05 | 0.000366 |
| HSPB1     | 0.422325 | 4.31E-09 | 7.61E-08 |
| HSPB2     | 0.129228 | 0.085579 | 0.150235 |
| HSPB3     | -0.02215 | 0.769123 | 0.835593 |
| HSPB6     | -0.09009 | 0.231734 | 0.335324 |
| HSPB7     | 0.087729 | 0.244243 | 0.349039 |
| HSPB8     | -0.13985 | 0.06263  | 0.115763 |
| HSPB9     | 0.134974 | 0.072445 | 0.130908 |
| HSPBAP1   | 0.21868  | 0.003362 | 0.009721 |
| HSPBP1    | 0.150295 | 0.045237 | 0.08847  |
| HSPC072   | 0.065275 | 0.386673 | 0.499417 |
| HSPC157   | -0.25543 | 0.000579 | 0.002155 |
| HSPC159   | 0.047998 | 0.524624 | 0.629943 |
| HSPD1     | 0.036049 | 0.632846 | 0.724729 |
| HSPE1     | 0.185087 | 0.013384 | 0.031653 |
| HSPG2     | 0.192202 | 0.010163 | 0.025042 |
| HSPH1     | 0.09258  | 0.219032 | 0.320635 |
| HTATIP2   | 0.439307 | 8.54E-10 | 1.85E-08 |
| HTATSF1   | -0.34489 | 2.42E-06 | 1.88E-05 |
| HTA       | -0.02895 | 0.701282 | 0.781909 |
| HTN1      | -0.12172 | 0.105535 | 0.178455 |
| HTR1A     | 0.01015  | 0.893035 | 0.925331 |
| HTR1B     | 0.372948 | 2.95E-07 | 3.01E-06 |
| HTR1D     | 0.40578  | 1.92E-08 | 2.77E-07 |
| HTR1E     | -0.25955 | 0.000468 | 0.001792 |
| HTR1F     | -0.18782 | 0.012053 | 0.028984 |
| HTR2A     | -0.18171 | 0.015203 | 0.035227 |
| HTR2B     | 0.238984 | 0.001315 | 0.004346 |

|        |          |          |          |
|--------|----------|----------|----------|
| HTR2C  | -0.00194 | 0.979451 | 0.985789 |
| HTR3A  | 0.211908 | 0.004517 | 0.012551 |
| HTR3B  | 0.052098 | 0.489786 | 0.598359 |
| HTR3C  | 0.219099 | 0.0033   | 0.00957  |
| HTR3D  | -0.02427 | 0.747762 | 0.818774 |
| HTR3E  | 0.171662 | 0.021954 | 0.047991 |
| HTR4   | -0.23694 | 0.001451 | 0.004734 |
| HTR5A  | -0.12119 | 0.107082 | 0.180591 |
| HTR6   | 0.000489 | 0.994835 | 0.9965   |
| HTR7P1 | -0.07413 | 0.325394 | 0.437518 |
| HTR7   | -0.04192 | 0.578519 | 0.677503 |
| HTRA1  | 0.121011 | 0.107611 | 0.181313 |
| HTRA2  | 0.195933 | 0.008764 | 0.022055 |
| HTRA3  | 0.369646 | 3.82E-07 | 3.77E-06 |
| HTRA4  | 0.125273 | 0.095684 | 0.16447  |
| HTT    | -0.4653  | 5.99E-11 | 1.80E-09 |
| HULC   | 0.045164 | 0.549422 | 0.651843 |
| HUNK   | -0.05465 | 0.468719 | 0.578799 |
| HUS1B  | 0.207935 | 0.00535  | 0.014506 |
| HUS1   | -0.15107 | 0.044126 | 0.086612 |
| HUWE1  | -0.32795 | 7.87E-06 | 5.26E-05 |
| HVCN1  | 0.125172 | 0.095954 | 0.164848 |
| HYAL1  | 0.281573 | 0.00014  | 0.000639 |
| HYAL2  | 0.136055 | 0.070166 | 0.127536 |
| HYAL3  | 0.198215 | 0.007996 | 0.020434 |
| HYAL4  | 0.197221 | 0.008323 | 0.021126 |
| HYDIN  | -0.16828 | 0.024748 | 0.053175 |
| HYI    | -0.11886 | 0.114061 | 0.189772 |
| HYLS1  | -0.16373 | 0.028975 | 0.060797 |
| HYMAI  | -0.10358 | 0.168867 | 0.259979 |
| HYOU1  | -0.36228 | 6.72E-07 | 6.17E-06 |
| IAH1   | 0.402345 | 2.59E-08 | 3.60E-07 |
| IAPP   | 0.023244 | 0.758109 | 0.827218 |
| IARS2  | 0.199022 | 0.007739 | 0.019847 |
| IARS   | -0.32085 | 1.26E-05 | 7.95E-05 |
| IBSP   | 0.251368 | 0.000713 | 0.002574 |
| IBTK   | -0.27797 | 0.000172 | 0.000761 |
| ICA1L  | -0.38357 | 1.26E-07 | 1.42E-06 |
| ICA1   | 0.060544 | 0.422088 | 0.534305 |
| ICAM1  | 0.150671 | 0.044694 | 0.087547 |
| ICAM2  | 0.130424 | 0.0827   | 0.146153 |
| ICAM3  | 0.005501 | 0.941908 | 0.960908 |
| ICAM4  | 0.120362 | 0.109523 | 0.183877 |
| ICAM5  | 0.304423 | 3.61E-05 | 0.000197 |
| ICK    | -0.10443 | 0.165346 | 0.255533 |
| ICMT   | -0.03278 | 0.664063 | 0.752115 |
| ICOSLG | 0.004251 | 0.955089 | 0.969205 |
| ICOS   | -0.01506 | 0.841818 | 0.888272 |
| ICT1   | 0.119657 | 0.111634 | 0.186739 |
| ID1    | 0.579069 | 2.52E-17 | 3.63E-15 |
| ID2B   | -0.04887 | 0.517101 | 0.623219 |
| ID2    | -0.11415 | 0.129217 | 0.209471 |
| ID3    | 0.080268 | 0.286837 | 0.395946 |
| ID4    | -0.27195 | 0.00024  | 0.001013 |

|         |          |          |          |
|---------|----------|----------|----------|
| IDE     | -0.06075 | 0.420471 | 0.532667 |
| IDH1    | 0.230929 | 0.001927 | 0.006041 |
| IDH2    | -0.11861 | 0.114817 | 0.190705 |
| IDH3A   | -0.39106 | 6.77E-08 | 8.30E-07 |
| IDH3B   | -0.03445 | 0.64798  | 0.737736 |
| IDH3G   | 0.109866 | 0.144321 | 0.229001 |
| IDI1    | 0.00916  | 0.90341  | 0.932488 |
| IDI2    | -0.15105 | 0.044158 | 0.08665  |
| IDO1    | -0.03778 | 0.616622 | 0.711299 |
| IDO2    | -0.0895  | 0.234801 | 0.338787 |
| IDS     | -0.33122 | 6.30E-06 | 4.36E-05 |
| IDUA    | 0.257355 | 0.000524 | 0.001979 |
| IER2    | 0.387923 | 8.79E-08 | 1.04E-06 |
| IER3IP1 | -0.3444  | 2.51E-06 | 1.94E-05 |
| IER3    | 0.371693 | 3.25E-07 | 3.28E-06 |
| IER5L   | 0.31937  | 1.39E-05 | 8.65E-05 |
| IER5    | 0.200974 | 0.007146 | 0.018531 |
| IFFO1   | -0.28385 | 0.000123 | 0.000571 |
| IFFO2   | 0.104725 | 0.164167 | 0.254089 |
| IFI16   | 0.275329 | 0.0002   | 0.000864 |
| IFI27L1 | 0.051192 | 0.497383 | 0.604911 |
| IFI27L2 | 0.176322 | 0.018556 | 0.041649 |
| IFI27   | 0.609591 | 1.71E-19 | 4.58E-17 |
| IFI30   | 0.207547 | 0.005439 | 0.014691 |
| IFI35   | 0.453347 | 2.09E-10 | 5.37E-09 |
| IFI44L  | 0.352101 | 1.44E-06 | 1.19E-05 |
| IFI44   | 0.486354 | 5.88E-12 | 2.25E-10 |
| IFI6    | 0.301094 | 4.43E-05 | 0.000237 |
| IFIH1   | 0.246458 | 0.000912 | 0.003175 |
| IFIT1B  | 0.044443 | 0.555819 | 0.657343 |
| IFIT1   | 0.260848 | 0.000437 | 0.001694 |
| IFIT2   | 0.270823 | 0.000256 | 0.001069 |
| IFIT3   | 0.30029  | 4.65E-05 | 0.000247 |
| IFIT5   | 0.023506 | 0.75546  | 0.824965 |
| IFITM1  | 0.304143 | 3.67E-05 | 0.0002   |
| IFITM2  | 0.446135 | 4.34E-10 | 1.03E-08 |
| IFITM3  | 0.383852 | 1.23E-07 | 1.40E-06 |
| IFITM4P | 0.214286 | 0.004076 | 0.011507 |
| IFITM5  | 0.100914 | 0.180147 | 0.273471 |
| IFLTD1  | -0.22004 | 0.003165 | 0.009242 |
| IFNA13  | 0.298936 | 5.05E-05 | 0.000265 |
| IFNA14  | 0.047559 | 0.528429 | 0.633342 |
| IFNA1   | 0.283632 | 0.000125 | 0.000577 |
| IFNA21  | -0.208   | 0.005335 | 0.014472 |
| IFNA2   | 0.035033 | 0.642472 | 0.733417 |
| IFNA4   | -0.01094 | 0.884777 | 0.919946 |
| IFNA5   | -0.00624 | 0.934162 | 0.95478  |
| IFNA6   | 0.040605 | 0.590481 | 0.688357 |
| IFNA7   | -0.01943 | 0.796897 | 0.856777 |
| IFNA8   | 0.269659 | 0.000273 | 0.001129 |
| IFNAR1  | 0.012289 | 0.870672 | 0.910742 |
| IFNAR2  | 0.184399 | 0.013739 | 0.032348 |
| IFNB1   | 0.156816 | 0.036582 | 0.073973 |
| IFNE    | 0.339427 | 3.57E-06 | 2.65E-05 |



|         |          |          |          |
|---------|----------|----------|----------|
| IFNGR1  | 0.002225 | 0.976481 | 0.983895 |
| IFNGR2  | 0.348399 | 1.88E-06 | 1.51E-05 |
| IFNG    | -0.03859 | 0.609023 | 0.704629 |
| IFNK    | 0.01314  | 0.861801 | 0.904036 |
| IFNW1   | -0.11144 | 0.138616 | 0.221781 |
| IFRD1   | -0.27944 | 0.000158 | 0.00071  |
| IFRD2   | 0.274105 | 0.000214 | 0.000914 |
| IFT122  | -0.04445 | 0.555788 | 0.657343 |
| IFT140  | -0.08557 | 0.256098 | 0.362492 |
| IFT172  | 0.043312 | 0.565934 | 0.666436 |
| IFT20   | -0.14662 | 0.050822 | 0.097322 |
| IFT27   | -0.08012 | 0.287743 | 0.396954 |
| IFT46   | 0.031845 | 0.673043 | 0.759415 |
| IFT52   | -0.21245 | 0.004412 | 0.012285 |
| IFT57   | -0.26793 | 0.000299 | 0.001226 |
| IFT74   | -0.31049 | 2.47E-05 | 0.000142 |
| IFT80   | -0.1248  | 0.096953 | 0.166318 |
| IFT81   | -0.27857 | 0.000166 | 0.000739 |
| IFT88   | -0.15089 | 0.044379 | 0.087024 |
| IGBP1   | 0.067729 | 0.369033 | 0.482368 |
| IGDCC3  | 0.023775 | 0.752753 | 0.822827 |
| IGDCC4  | 0.062908 | 0.404159 | 0.516769 |
| IGF1R   | -0.19112 | 0.010605 | 0.025972 |
| IGF1    | -0.19033 | 0.010936 | 0.026672 |
| IGF2AS  | 0.116958 | 0.120003 | 0.197399 |
| IGF2BP1 | 0.099839 | 0.184857 | 0.279121 |
| IGF2BP2 | 0.436817 | 1.09E-09 | 2.27E-08 |
| IGF2BP3 | 0.27194  | 0.000241 | 0.001014 |
| IGF2R   | -0.31975 | 1.36E-05 | 8.46E-05 |
| IGF2    | 0.117246 | 0.119086 | 0.196268 |
| IGFALS  | -0.08615 | 0.252893 | 0.358937 |
| IGFBP1  | 0.204133 | 0.006274 | 0.016614 |
| IGFBP2  | -0.11658 | 0.121229 | 0.198815 |
| IGFBP3  | 0.417399 | 6.78E-09 | 1.13E-07 |
| IGFBP4  | 0.136084 | 0.070105 | 0.127461 |
| IGFBP5  | 0.162728 | 0.029988 | 0.06265  |
| IGFBP6  | 0.442374 | 6.31E-10 | 1.43E-08 |
| IGFBP7  | 0.09507  | 0.206833 | 0.306109 |
| IGFBPL1 | -0.23111 | 0.001911 | 0.005999 |
| IGFL1   | 0.314063 | 1.96E-05 | 0.000117 |
| IGFL2   | 0.479919 | 1.22E-11 | 4.24E-10 |
| IGFL3   | 0.31195  | 2.25E-05 | 0.000131 |
| IGFL4   | -0.15501 | 0.038831 | 0.077702 |
| IGFN1   | -0.18554 | 0.013155 | 0.031202 |
| IGHMBP2 | 0.092538 | 0.219239 | 0.320843 |
| IGJ     | 0.073836 | 0.32734  | 0.439198 |
| IGLL1   | -0.04466 | 0.553914 | 0.655639 |
| IGLL3   | -0.11853 | 0.115061 | 0.191018 |
| IGLON5  | 0.318772 | 1.45E-05 | 8.95E-05 |
| IGSF10  | -0.20665 | 0.005647 | 0.01518  |
| IGSF11  | 0.078912 | 0.295081 | 0.40497  |
| IGSF1   | -0.17995 | 0.016234 | 0.037287 |
| IGSF21  | -0.19119 | 0.010575 | 0.025918 |
| IGSF22  | 0.21072  | 0.004753 | 0.01312  |

|         |          |          |          |
|---------|----------|----------|----------|
| IGSF3   | 0.38343  | 1.27E-07 | 1.44E-06 |
| IGSF5   | 0.123088 | 0.101661 | 0.172998 |
| IGSF6   | 0.052549 | 0.486032 | 0.594838 |
| IGSF8   | 0.189241 | 0.01141  | 0.027642 |
| IGSF9B  | 0.229472 | 0.002062 | 0.006397 |
| IGSF9   | 0.540382 | 6.96E-15 | 5.33E-13 |
| IHH     | 0.443526 | 5.63E-10 | 1.30E-08 |
| IKBIP   | -0.12215 | 0.104326 | 0.176788 |
| IKBKAP  | -0.51215 | 2.73E-13 | 1.46E-11 |
| IKBKB   | 0.428842 | 2.34E-09 | 4.44E-08 |
| IKBKE   | 0.237675 | 0.001401 | 0.004591 |
| IKBKG   | 0.195716 | 0.008841 | 0.022207 |
| IKZF1   | -0.08914 | 0.236724 | 0.340634 |
| IKZF2   | 0.189607 | 0.011249 | 0.027319 |
| IKZF3   | -0.14701 | 0.05021  | 0.096309 |
| IKZF4   | -0.43743 | 1.03E-09 | 2.16E-08 |
| IKZF5   | -0.33584 | 4.58E-06 | 3.29E-05 |
| IK      | 0.031948 | 0.672039 | 0.758673 |
| IL10RA  | -0.08466 | 0.261201 | 0.367981 |
| IL10RB  | 0.373037 | 2.93E-07 | 2.99E-06 |
| IL10    | -0.08081 | 0.283608 | 0.392502 |
| IL11RA  | -0.10713 | 0.154649 | 0.242335 |
| IL11    | 0.177595 | 0.017711 | 0.040076 |
| IL12A   | -0.17618 | 0.018653 | 0.041842 |
| IL12B   | -0.02348 | 0.755684 | 0.825073 |
| IL12RB1 | 0.057581 | 0.445198 | 0.55661  |
| IL12RB2 | -0.33357 | 5.36E-06 | 3.78E-05 |
| IL13RA1 | -0.10859 | 0.149086 | 0.235165 |
| IL13RA2 | -0.31227 | 2.20E-05 | 0.000128 |
| IL13    | -0.18537 | 0.013241 | 0.031368 |
| IL15RA  | 0.393452 | 5.54E-08 | 6.95E-07 |
| IL15    | 0.183707 | 0.014104 | 0.033051 |
| IL16    | -0.05217 | 0.489194 | 0.59782  |
| IL17A   | -0.17371 | 0.020402 | 0.045172 |
| IL17B   | 0.078205 | 0.299445 | 0.409547 |
| IL17C   | 0.143688 | 0.055688 | 0.105054 |
| IL17D   | -0.07151 | 0.342852 | 0.455125 |
| IL17F   | -0.04993 | 0.508019 | 0.614716 |
| IL17RA  | 0.086021 | 0.253582 | 0.359757 |
| IL17RB  | -0.12446 | 0.097866 | 0.167651 |
| IL17RC  | 0.047708 | 0.52714  | 0.632346 |
| IL17RD  | 0.004618 | 0.951214 | 0.96696  |
| IL17REL | -0.02672 | 0.723306 | 0.799165 |
| IL17RE  | 0.374997 | 2.51E-07 | 2.62E-06 |
| IL18BP  | 0.023159 | 0.758959 | 0.827988 |
| IL18R1  | -0.08759 | 0.245019 | 0.34987  |
| IL18RAP | -0.15823 | 0.034902 | 0.071086 |
| IL18    | 0.544642 | 3.88E-15 | 3.09E-13 |
| IL19    | 0.072615 | 0.335424 | 0.447549 |
| IL1A    | 0.378725 | 1.86E-07 | 2.01E-06 |
| IL1B    | -0.08215 | 0.27563  | 0.383554 |
| IL1F10  | 0.099855 | 0.184785 | 0.279054 |
| IL1F5   | 0.226891 | 0.002322 | 0.007095 |
| IL1F6   | 0.097131 | 0.197115 | 0.294281 |

|          |          |          |          |
|----------|----------|----------|----------|
| IL1F7    | 0.232327 | 0.001805 | 0.005711 |
| IL1F8    | 0.293912 | 6.83E-05 | 0.000342 |
| IL1F9    | 0.119295 | 0.112729 | 0.188062 |
| IL1R1    | -0.03493 | 0.643412 | 0.73379  |
| IL1R2    | 0.529917 | 2.82E-14 | 1.89E-12 |
| IL1RAPL1 | -0.27    | 0.000268 | 0.001112 |
| IL1RAPL2 | 0.238959 | 0.001317 | 0.00435  |
| IL1RAP   | 0.38879  | 8.18E-08 | 9.80E-07 |
| IL1RL1   | -0.19588 | 0.008782 | 0.022096 |
| IL1RL2   | -0.12776 | 0.089219 | 0.155303 |
| IL1RN    | 0.736149 | 1.18E-31 | 1.17E-27 |
| IL20RA   | 0.086728 | 0.249686 | 0.355072 |
| IL20RB   | 0.561105 | 3.75E-16 | 3.86E-14 |
| IL20     | -0.11168 | 0.137768 | 0.22071  |
| IL21R    | 0.074425 | 0.323481 | 0.435492 |
| IL21     | -0.22194 | 0.002907 | 0.008613 |
| IL22RA1  | 0.255191 | 0.000586 | 0.002179 |
| IL22RA2  | 0.149844 | 0.045894 | 0.08947  |
| IL22     | -0.07053 | 0.349493 | 0.462142 |
| IL23A    | 0.231275 | 0.001896 | 0.005959 |
| IL23R    | -0.19004 | 0.011059 | 0.026924 |
| IL24     | -0.11295 | 0.133329 | 0.214817 |
| IL25     | 0.00725  | 0.923485 | 0.946901 |
| IL26     | -0.19197 | 0.010258 | 0.025225 |
| IL27RA   | 0.059406 | 0.430876 | 0.542788 |
| IL27     | 0.15112  | 0.044054 | 0.086516 |
| IL28A    | 0.151346 | 0.043736 | 0.086001 |
| IL28B    | 0.240175 | 0.001242 | 0.004141 |
| IL28RA   | -0.11215 | 0.136093 | 0.218505 |
| IL29     | 0.164866 | 0.027867 | 0.058815 |
| IL2RA    | 0.081266 | 0.280871 | 0.389259 |
| IL2RB    | -0.12061 | 0.108788 | 0.182854 |
| IL2RG    | 0.418897 | 5.91E-09 | 1.00E-07 |
| IL2      | -0.1555  | 0.038206 | 0.076667 |
| IL31RA   | 0.243389 | 0.001061 | 0.003614 |
| IL31     | 0.090948 | 0.227294 | 0.329897 |
| IL32     | 0.383108 | 1.31E-07 | 1.47E-06 |
| IL33     | -0.22475 | 0.002561 | 0.007714 |
| IL34     | 0.133665 | 0.075283 | 0.135209 |
| IL3RA    | -0.08261 | 0.272981 | 0.381074 |
| IL3      | -0.03275 | 0.664272 | 0.752266 |
| IL4I1    | 0.238422 | 0.001351 | 0.004447 |
| IL4R     | 0.262162 | 0.000408 | 0.001596 |
| IL4      | -0.13432 | 0.073862 | 0.13303  |
| IL5RA    | -0.11916 | 0.113124 | 0.188566 |
| IL5      | -0.09401 | 0.211949 | 0.312302 |
| IL6R     | -0.30229 | 4.11E-05 | 0.000222 |
| IL6ST    | -0.2274  | 0.002268 | 0.006958 |
| IL6      | -0.14689 | 0.050395 | 0.09662  |
| IL7R     | -0.05351 | 0.478122 | 0.587813 |
| IL7      | 0.166104 | 0.026698 | 0.056749 |
| IL8      | 0.203593 | 0.006416 | 0.016934 |
| IL9R     | 0.021422 | 0.776547 | 0.841348 |
| ILDRI    | 0.248134 | 0.000839 | 0.002956 |

|        |          |          |          |
|--------|----------|----------|----------|
| ILDR2  | -0.06465 | 0.39121  | 0.503895 |
| ILF2   | 0.00588  | 0.93791  | 0.957967 |
| ILF3   | -0.08342 | 0.268268 | 0.37585  |
| ILKAP  | 0.144232 | 0.054758 | 0.103597 |
| ILK    | 0.251957 | 0.000692 | 0.002506 |
| ILVBL  | 0.120941 | 0.107815 | 0.18161  |
| IMMP1L | -0.21546 | 0.003874 | 0.01101  |
| IMMP2L | -0.10964 | 0.145137 | 0.230063 |
| IMMT   | -0.06087 | 0.419565 | 0.53177  |
| IMP3   | 0.168202 | 0.024813 | 0.053298 |
| IMP4   | 0.28089  | 0.000146 | 0.00066  |
| IMP5   | -0.00805 | 0.915051 | 0.94078  |
| IMPA1  | -0.04073 | 0.589349 | 0.687295 |
| IMPA2  | 0.004387 | 0.953654 | 0.968351 |
| IMPACT | -0.11077 | 0.141011 | 0.224813 |
| IMPAD1 | -0.27447 | 0.000209 | 0.0009   |
| IMPDH1 | 0.144745 | 0.053893 | 0.102233 |
| IMPDH2 | 0.1277   | 0.089377 | 0.155493 |
| IMPG1  | -0.06106 | 0.41816  | 0.530441 |
| IMPG2  | -0.20106 | 0.007122 | 0.018482 |
| INADL  | 0.261797 | 0.000416 | 0.001623 |
| INA    | -0.30619 | 3.23E-05 | 0.00018  |
| INCA1  | -0.19215 | 0.010184 | 0.025079 |
| INCENP | 0.179393 | 0.016575 | 0.037916 |
| INE1   | 0.188819 | 0.011598 | 0.028029 |
| INE2   | -0.20205 | 0.006836 | 0.017886 |
| INF2   | 0.546532 | 2.99E-15 | 2.43E-13 |
| ING1   | 0.2818   | 0.000139 | 0.000632 |
| ING2   | -0.06939 | 0.357396 | 0.470548 |
| ING3   | -0.4347  | 1.34E-09 | 2.71E-08 |
| ING4   | -0.02766 | 0.714037 | 0.791888 |
| ING5   | -0.23306 | 0.001744 | 0.005545 |
| INGX   | -0.01683 | 0.823514 | 0.875023 |
| INHA   | -0.07055 | 0.349352 | 0.461986 |
| INHBA  | 0.151742 | 0.043182 | 0.085056 |
| INHBB  | 0.101922 | 0.175814 | 0.268168 |
| INHBC  | -0.06844 | 0.364049 | 0.477336 |
| INHBE  | 0.01785  | 0.813051 | 0.867588 |
| INMT   | 0.0367   | 0.626714 | 0.719958 |
| IN080B | 0.256396 | 0.000551 | 0.002065 |
| IN080C | 0.164722 | 0.028005 | 0.059069 |
| IN080D | 0.029362 | 0.697227 | 0.778573 |
| IN080E | 0.31077  | 2.42E-05 | 0.000139 |
| IN080  | -0.02097 | 0.781183 | 0.844566 |
| INPP1  | 0.349869 | 1.69E-06 | 1.37E-05 |
| INPP4A | -0.22907 | 0.002101 | 0.00651  |
| INPP4B | 0.534458 | 1.55E-14 | 1.10E-12 |
| INPP5A | 0.212832 | 0.004341 | 0.012123 |
| INPP5B | -0.19906 | 0.007726 | 0.019821 |
| INPP5D | -0.02111 | 0.779766 | 0.843311 |
| INPP5E | -0.05696 | 0.450131 | 0.560934 |
| INPP5F | 0.068682 | 0.362322 | 0.475573 |
| INPP5J | -0.12955 | 0.084796 | 0.149085 |
| INPP5K | -0.27609 | 0.000191 | 0.000833 |

|          |          |          |          |
|----------|----------|----------|----------|
| INPPL1   | 0.124897 | 0.096693 | 0.165974 |
| INS-IGF2 | 0.007809 | 0.917606 | 0.94278  |
| INSC     | 0.248349 | 0.00083  | 0.002931 |
| INSIG1   | -0.00286 | 0.969785 | 0.979394 |
| INSIG2   | 0.375507 | 2.41E-07 | 2.52E-06 |
| INSL3    | 0.153763 | 0.040443 | 0.08047  |
| INSL4    | -0.06533 | 0.386294 | 0.499026 |
| INSL5    | -0.24159 | 0.001159 | 0.003902 |
| INSL6    | 0.07418  | 0.325079 | 0.437197 |
| INSM1    | -0.33465 | 4.98E-06 | 3.55E-05 |
| INSM2    | -0.26171 | 0.000418 | 0.001629 |
| INSRR    | -0.10596 | 0.159223 | 0.247833 |
| INSR     | -0.16986 | 0.023403 | 0.050743 |
| INS      | 0.19832  | 0.007962 | 0.020359 |
| INTS10   | -0.21184 | 0.00453  | 0.012581 |
| INTS12   | 0.02706  | 0.719937 | 0.796332 |
| INTS1    | -0.05176 | 0.492597 | 0.601086 |
| INTS2    | -0.27464 | 0.000207 | 0.000893 |
| INTS3    | -0.10681 | 0.155904 | 0.243953 |
| INTS4L1  | 0.077458 | 0.304097 | 0.414505 |
| INTS4L2  | 0.096539 | 0.199874 | 0.297605 |
| INTS4    | 0.259126 | 0.000478 | 0.001829 |
| INTS5    | 0.050719 | 0.501368 | 0.608448 |
| INTS6    | -0.08182 | 0.277579 | 0.385696 |
| INTS7    | -0.13331 | 0.076061 | 0.136297 |
| INTS8    | 0.058591 | 0.437241 | 0.548883 |
| INTS9    | -0.02094 | 0.781406 | 0.84476  |
| INTU     | 0.01874  | 0.803919 | 0.861571 |
| INVS     | -0.4444  | 5.16E-10 | 1.20E-08 |
| IP6K1    | -0.43118 | 1.87E-09 | 3.65E-08 |
| IP6K2    | 0.052239 | 0.48861  | 0.597254 |
| IP6K3    | -0.10756 | 0.152993 | 0.240217 |
| IPCEF1   | -0.14295 | 0.056963 | 0.106959 |
| IPMK     | -0.23353 | 0.001705 | 0.005444 |
| IP011    | -0.22746 | 0.002262 | 0.006941 |
| IP013    | -0.33412 | 5.16E-06 | 3.66E-05 |
| IP04     | -0.1652  | 0.02755  | 0.058252 |
| IP05     | -0.18256 | 0.014727 | 0.034341 |
| IP07     | -0.09382 | 0.212888 | 0.313405 |
| IP08     | -0.24377 | 0.001042 | 0.003553 |
| IP09     | -0.14846 | 0.047962 | 0.09279  |
| IPPK     | -0.31687 | 1.64E-05 | 9.95E-05 |
| IPP      | -0.20868 | 0.005185 | 0.014123 |
| IPW      | -0.30732 | 3.01E-05 | 0.000169 |
| IQCA1    | 0.047494 | 0.528991 | 0.633572 |
| IQCB1    | 0.142447 | 0.057858 | 0.108321 |
| IQCC     | -0.24188 | 0.001143 | 0.003856 |
| IQCD     | -0.20788 | 0.005364 | 0.014531 |
| IQCE     | 0.01888  | 0.802485 | 0.860906 |
| IQCF1    | 0.200854 | 0.007182 | 0.018603 |
| IQCF3    | 0.08234  | 0.274541 | 0.382508 |
| IQCF5    | 0.098983 | 0.18867  | 0.283924 |
| IQCF6    | -0.04377 | 0.561803 | 0.662715 |
| IQCG     | -0.34201 | 2.98E-06 | 2.26E-05 |

|          |          |          |          |
|----------|----------|----------|----------|
| IQCH     | -0.19128 | 0.010537 | 0.025836 |
| IQCJ     | 0.124754 | 0.097079 | 0.16649  |
| IQCK     | 0.034151 | 0.650869 | 0.739884 |
| IQGAP1   | 0.111929 | 0.13689  | 0.219597 |
| IQGAP2   | 0.054066 | 0.473518 | 0.583349 |
| IQGAP3   | 0.46764  | 4.67E-11 | 1.45E-09 |
| IQSEC1   | -0.29123 | 8.02E-05 | 0.000392 |
| IQSEC2   | 0.076728 | 0.308695 | 0.419125 |
| IQSEC3   | -0.35495 | 1.17E-06 | 9.91E-06 |
| IQUB     | -0.32741 | 8.16E-06 | 5.42E-05 |
| IRAK1BP1 | -0.36818 | 4.27E-07 | 4.14E-06 |
| IRAK1    | 0.19957  | 0.007568 | 0.019486 |
| IRAK2    | 0.440938 | 7.28E-10 | 1.61E-08 |
| IRAK3    | 0.129868 | 0.084029 | 0.148038 |
| IRAK4    | -0.29494 | 6.43E-05 | 0.000324 |
| IREB2    | -0.29856 | 5.17E-05 | 0.00027  |
| IRF1     | 0.166531 | 0.026304 | 0.056031 |
| IRF2BP1  | -0.1422  | 0.058293 | 0.10896  |
| IRF2BP2  | -0.23427 | 0.001647 | 0.005286 |
| IRF2     | 0.034997 | 0.64281  | 0.733568 |
| IRF3     | 0.368685 | 4.11E-07 | 4.02E-06 |
| IRF4     | -0.02123 | 0.778457 | 0.842679 |
| IRF5     | 0.204492 | 0.006181 | 0.016398 |
| IRF6     | 0.224766 | 0.002559 | 0.00771  |
| IRF7     | 0.347179 | 2.06E-06 | 1.63E-05 |
| IRF8     | 0.082252 | 0.275052 | 0.382966 |
| IRF9     | 0.424266 | 3.60E-09 | 6.52E-08 |
| IRGC     | 0.175193 | 0.019334 | 0.043136 |
| IRGM     | -0.04551 | 0.546383 | 0.649056 |
| IRGQ     | -0.19632 | 0.00863  | 0.021774 |
| IRS1     | 0.212701 | 0.004365 | 0.012179 |
| IRS2     | -0.2954  | 6.25E-05 | 0.000317 |
| IRS4     | -0.08399 | 0.265011 | 0.372342 |
| IRX1     | -0.22647 | 0.002367 | 0.007211 |
| IRX2     | -0.18438 | 0.013748 | 0.032363 |
| IRX3     | 0.203355 | 0.006479 | 0.017087 |
| IRX4     | -0.22475 | 0.00256  | 0.007714 |
| IRX5     | 0.436126 | 1.16E-09 | 2.41E-08 |
| IRX6     | -0.08808 | 0.242375 | 0.346897 |
| ISCA1P1  | -0.38415 | 1.20E-07 | 1.37E-06 |
| ISCA1    | -0.46686 | 5.07E-11 | 1.55E-09 |
| ISCA2    | 0.114672 | 0.127466 | 0.20716  |
| ISCU     | -0.31917 | 1.41E-05 | 8.75E-05 |
| ISG15    | 0.471047 | 3.23E-11 | 1.03E-09 |
| ISG20L2  | -0.01138 | 0.880188 | 0.916865 |
| ISG20    | 0.343706 | 2.64E-06 | 2.03E-05 |
| ISL1     | -0.27875 | 0.000165 | 0.000732 |
| ISL2     | 0.274768 | 0.000206 | 0.000887 |
| ISLR2    | 0.213969 | 0.004132 | 0.011642 |
| ISLR     | 0.338964 | 3.69E-06 | 2.72E-05 |
| ISM1     | 0.294654 | 6.54E-05 | 0.000329 |
| ISM2     | -0.06854 | 0.363288 | 0.476528 |
| ISOC1    | -0.07934 | 0.292467 | 0.402116 |
| ISOC2    | 0.201591 | 0.006968 | 0.018175 |

|          |          |          |          |
|----------|----------|----------|----------|
| ISPD     | -0.1847  | 0.013585 | 0.032079 |
| ISX      | 0.000138 | 0.998537 | 0.99874  |
| ISY1     | 0.252514 | 0.000673 | 0.002441 |
| ISYNA1   | -0.06615 | 0.380327 | 0.49312  |
| ITCH     | -0.13434 | 0.073816 | 0.132961 |
| ITFG1    | -0.17812 | 0.017375 | 0.039423 |
| ITFG2    | -0.3061  | 3.25E-05 | 0.000181 |
| ITFG3    | 0.171803 | 0.021844 | 0.047782 |
| ITGA10   | 0.071965 | 0.339778 | 0.452016 |
| ITGA11   | 0.241127 | 0.001186 | 0.003978 |
| ITGA1    | -0.05806 | 0.44139  | 0.553178 |
| ITGA2B   | -0.11516 | 0.125856 | 0.205116 |
| ITGA2    | 0.414113 | 9.13E-09 | 1.46E-07 |
| ITGA3    | 0.635199 | 1.69E-21 | 8.21E-19 |
| ITGA4    | -0.18961 | 0.011246 | 0.027316 |
| ITGA5    | 0.117371 | 0.118692 | 0.195764 |
| ITGA6    | 0.443501 | 5.65E-10 | 1.30E-08 |
| ITGA7    | -0.27731 | 0.000179 | 0.000786 |
| ITGA8    | -0.17547 | 0.019143 | 0.042797 |
| ITGA9    | -0.23595 | 0.001521 | 0.004929 |
| ITGAD    | -0.21148 | 0.004602 | 0.012753 |
| ITGAE    | -0.30432 | 3.63E-05 | 0.000198 |
| ITGAL    | -0.00437 | 0.953867 | 0.968462 |
| ITGAM    | 0.173858 | 0.020291 | 0.044962 |
| ITGAV    | 0.115344 | 0.125236 | 0.204303 |
| ITGAX    | 0.211552 | 0.004586 | 0.01272  |
| ITGB1BP1 | 0.243921 | 0.001034 | 0.003532 |
| ITGB1BP2 | 0.245474 | 0.000958 | 0.003309 |
| ITGB1BP3 | -0.1187  | 0.114538 | 0.190374 |
| ITGB1    | 0.241516 | 0.001163 | 0.003914 |
| ITGB2    | 0.200098 | 0.007407 | 0.019126 |
| ITGB3BP  | 0.133526 | 0.07559  | 0.135653 |
| ITGB3    | 0.04083  | 0.588417 | 0.686556 |
| ITGB4    | 0.629643 | 4.77E-21 | 1.97E-18 |
| ITGB5    | 0.4579   | 1.31E-10 | 3.57E-09 |
| ITGB6    | 0.561989 | 3.30E-16 | 3.52E-14 |
| ITGB7    | 0.306561 | 3.16E-05 | 0.000176 |
| ITGB8    | 0.107152 | 0.154556 | 0.242229 |
| ITGBL1   | 0.081658 | 0.278544 | 0.386766 |
| ITIH1    | -0.19652 | 0.008562 | 0.021647 |
| ITIH2    | 0.19876  | 0.007821 | 0.020036 |
| ITIH3    | 0.223048 | 0.002766 | 0.008242 |
| ITIH4    | 0.040574 | 0.590758 | 0.688506 |
| ITIH5L   | -0.14411 | 0.054967 | 0.103936 |
| ITIH5    | -0.0268  | 0.722531 | 0.798442 |
| ITK      | -0.07815 | 0.299811 | 0.409931 |
| ITLN1    | 0.010674 | 0.887546 | 0.921761 |
| ITLN2    | -0.17273 | 0.021132 | 0.046504 |
| ITM2A    | -0.29238 | 7.49E-05 | 0.000369 |
| ITM2B    | 0.232716 | 0.001772 | 0.005624 |
| ITM2C    | -0.13664 | 0.068966 | 0.125667 |
| ITPA     | 0.387766 | 8.91E-08 | 1.06E-06 |
| ITPK1    | 0.373275 | 2.87E-07 | 2.94E-06 |
| ITPKA    | 0.471231 | 3.17E-11 | 1.01E-09 |

|           |          |          |          |
|-----------|----------|----------|----------|
| ITPKB     | -0.09031 | 0.230573 | 0.33397  |
| ITPKC     | 0.441711 | 6.74E-10 | 1.51E-08 |
| ITPR1     | -0.31963 | 1.37E-05 | 8.52E-05 |
| ITPR2     | -0.23606 | 0.001513 | 0.004906 |
| ITPR3     | 0.431518 | 1.81E-09 | 3.54E-08 |
| ITPRIPL1  | -0.12918 | 0.085705 | 0.150402 |
| ITPRIPL2  | 0.234832 | 0.001604 | 0.005161 |
| ITPRIP    | 0.085156 | 0.258406 | 0.364901 |
| ITSN1     | 0.105694 | 0.16028  | 0.249164 |
| ITSN2     | -0.01914 | 0.799799 | 0.859103 |
| IVD       | 0.048609 | 0.519353 | 0.624981 |
| IVL       | 0.246267 | 0.000921 | 0.003197 |
| IVNS1ABP  | 0.1909   | 0.010695 | 0.026165 |
| IWS1      | 0.322264 | 1.15E-05 | 7.35E-05 |
| IYD       | 0.294577 | 6.57E-05 | 0.000331 |
| IZUM01    | -0.21469 | 0.004004 | 0.011335 |
| JAG1      | 0.297911 | 5.37E-05 | 0.000279 |
| JAG2      | 0.079149 | 0.293631 | 0.403436 |
| JAGN1     | 0.152154 | 0.042611 | 0.08409  |
| JAK1      | -0.13926 | 0.063745 | 0.117559 |
| JAK2      | -0.13911 | 0.064048 | 0.117967 |
| JAK3      | -0.05915 | 0.432843 | 0.544573 |
| JAKMIP1   | -0.23774 | 0.001396 | 0.004578 |
| JAKMIP2   | -0.3346  | 5.00E-06 | 3.56E-05 |
| JAKMIP3   | -0.2322  | 0.001816 | 0.005742 |
| JAM2      | -0.13838 | 0.065472 | 0.120242 |
| JAM3      | -0.06594 | 0.381874 | 0.49464  |
| JARID2    | -0.20879 | 0.00516  | 0.014066 |
| JAZF1     | -0.17671 | 0.018292 | 0.041146 |
| JDP2      | 0.103382 | 0.169673 | 0.260956 |
| JHDM1D    | -0.10637 | 0.157607 | 0.245957 |
| JKAMP     | -0.10608 | 0.158766 | 0.247258 |
| JMJD1C    | -0.06672 | 0.376202 | 0.489087 |
| JMJD4     | 0.023366 | 0.756872 | 0.826142 |
| JMJD5     | -0.38939 | 7.78E-08 | 9.38E-07 |
| JMJD6     | -0.01639 | 0.828076 | 0.878313 |
| JMJD7-PLA | 0.17648  | 0.018449 | 0.041446 |
| JMJD8     | 0.015962 | 0.832522 | 0.881138 |
| JMY       | -0.48958 | 4.06E-12 | 1.62E-10 |
| JOSD1     | 0.268125 | 0.000296 | 0.001216 |
| JOSD2     | 0.314619 | 1.89E-05 | 0.000113 |
| JPH1      | -0.06419 | 0.394599 | 0.507314 |
| JPH2      | 0.22843  | 0.002163 | 0.006682 |
| JPH3      | -0.26369 | 0.000376 | 0.001488 |
| JPH4      | -0.1688  | 0.0243   | 0.052355 |
| JRKL      | 0.302748 | 4.00E-05 | 0.000217 |
| JRK       | -0.07558 | 0.315995 | 0.427306 |
| JSRP1     | 0.006854 | 0.927649 | 0.949989 |
| JTB       | 0.025639 | 0.734071 | 0.807854 |
| JUB       | 0.322739 | 1.11E-05 | 7.15E-05 |
| JUNB      | 0.408966 | 1.45E-08 | 2.16E-07 |
| JUND      | 0.111022 | 0.14012  | 0.223681 |
| JUN       | 0.08944  | 0.23513  | 0.339104 |
| JUP       | 0.627894 | 6.59E-21 | 2.55E-18 |



|         |          |          |          |
|---------|----------|----------|----------|
| KAAG1   | 0.083979 | 0.265067 | 0.372394 |
| KAL1    | 0.083371 | 0.268552 | 0.376141 |
| KALRN   | 0.162708 | 0.030008 | 0.062672 |
| KANK1   | -0.42645 | 2.93E-09 | 5.43E-08 |
| KANK2   | 0.17691  | 0.018161 | 0.040902 |
| KANK3   | -0.16262 | 0.0301   | 0.062831 |
| KANK4   | 0.224961 | 0.002536 | 0.007653 |
| KARS    | 0.364606 | 5.63E-07 | 5.29E-06 |
| KAT2A   | 0.207233 | 0.005511 | 0.01486  |
| KAT2B   | -0.34974 | 1.71E-06 | 1.38E-05 |
| KAT5    | 0.008726 | 0.907969 | 0.935747 |
| KATNA1  | -0.06408 | 0.395475 | 0.508239 |
| KATNAL1 | -0.20085 | 0.007182 | 0.018603 |
| KATNAL2 | -0.48494 | 6.91E-12 | 2.59E-10 |
| KATNB1  | -0.01175 | 0.87627  | 0.914373 |
| KAZALD1 | 0.077732 | 0.302387 | 0.412658 |
| KAZ     | 0.198162 | 0.008013 | 0.02047  |
| KBTBD10 | -0.28824 | 9.56E-05 | 0.000456 |
| KBTBD11 | 0.162531 | 0.030189 | 0.062991 |
| KBTBD12 | 0.248239 | 0.000835 | 0.002944 |
| KBTBD13 | 0.053249 | 0.480232 | 0.58971  |
| KBTBD2  | 0.041605 | 0.581358 | 0.680102 |
| KBTBD3  | -0.19537 | 0.008963 | 0.02246  |
| KBTBD4  | -0.27131 | 0.000249 | 0.001044 |
| KBTBD5  | 0.034418 | 0.648327 | 0.737784 |
| KBTBD6  | -0.42841 | 2.44E-09 | 4.60E-08 |
| KBTBD7  | -0.36043 | 7.74E-07 | 6.97E-06 |
| KBTBD8  | -0.17705 | 0.01807  | 0.040734 |
| KC6     | -0.17475 | 0.019645 | 0.043736 |
| KCMF1   | 0.245385 | 0.000962 | 0.003321 |
| KCNA10  | 0.122418 | 0.10355  | 0.175668 |
| KCNA1   | -0.31639 | 1.69E-05 | 0.000102 |
| KCNA2   | -0.35819 | 9.15E-07 | 8.03E-06 |
| KCNA3   | -0.28795 | 9.72E-05 | 0.000463 |
| KCNA4   | -0.23649 | 0.001482 | 0.00482  |
| KCNA5   | -0.2723  | 0.000236 | 0.000998 |
| KCNA6   | -0.32626 | 8.81E-06 | 5.81E-05 |
| KCNA7   | 0.400973 | 2.92E-08 | 3.96E-07 |
| KCNAB1  | -0.22493 | 0.00254  | 0.007663 |
| KCNAB2  | -0.04456 | 0.554739 | 0.656383 |
| KCNAB3  | -0.02771 | 0.713533 | 0.79155  |
| KCNB1   | -0.42243 | 4.27E-09 | 7.55E-08 |
| KCNB2   | -0.31239 | 2.18E-05 | 0.000128 |
| KCNC1   | -0.29851 | 5.18E-05 | 0.00027  |
| KCNC2   | -0.20137 | 0.007031 | 0.01832  |
| KCNC3   | -0.21624 | 0.003743 | 0.010693 |
| KCNC4   | 0.021899 | 0.771704 | 0.837431 |
| KCND1   | -0.04456 | 0.554753 | 0.656383 |
| KCND2   | 0.092033 | 0.221779 | 0.323817 |
| KCND3   | -0.18553 | 0.013161 | 0.031211 |
| KCNE1L  | 0.069482 | 0.356742 | 0.469873 |
| KCNE1   | -0.03606 | 0.632701 | 0.724605 |
| KCNE2   | -0.03815 | 0.613104 | 0.708564 |
| KCNE3   | 0.280568 | 0.000149 | 0.000671 |

|        |          |          |          |
|--------|----------|----------|----------|
| KCNE4  | -0.0671  | 0.373535 | 0.486612 |
| KCNF1  | -0.08694 | 0.248546 | 0.353961 |
| KCNG1  | -0.21387 | 0.004151 | 0.011683 |
| KCNG2  | -0.26857 | 0.000289 | 0.001192 |
| KCNG3  | -0.24753 | 0.000865 | 0.003034 |
| KCNG4  | 0.022847 | 0.762107 | 0.830344 |
| KCNH1  | -0.29637 | 5.90E-05 | 0.000302 |
| KCNH2  | -0.29854 | 5.17E-05 | 0.00027  |
| KCNH3  | -0.3396  | 3.53E-06 | 2.62E-05 |
| KCNH4  | 0.047526 | 0.528714 | 0.63347  |
| KCNH5  | -0.20456 | 0.006164 | 0.016363 |
| KCNH6  | -0.34761 | 1.99E-06 | 1.58E-05 |
| KCNH7  | -0.36865 | 4.12E-07 | 4.02E-06 |
| KCNH8  | 0.092823 | 0.217819 | 0.319238 |
| KCNIP1 | -0.08882 | 0.238416 | 0.342519 |
| KCNIP2 | -0.04806 | 0.524125 | 0.629536 |
| KCNIP3 | 0.048434 | 0.520865 | 0.626495 |
| KCNIP4 | -0.14953 | 0.04636  | 0.090193 |
| KCNJ10 | -0.18847 | 0.011753 | 0.028339 |
| KCNJ11 | -0.27929 | 0.00016  | 0.000714 |
| KCNJ12 | -0.14547 | 0.052686 | 0.10029  |
| KCNJ13 | -0.00171 | 0.981932 | 0.987475 |
| KCNJ14 | 0.024704 | 0.743422 | 0.815151 |
| KCNJ15 | 0.254252 | 0.000615 | 0.002264 |
| KCNJ16 | -0.07896 | 0.294805 | 0.40474  |
| KCNJ1  | -0.0389  | 0.606224 | 0.702213 |
| KCNJ2  | -0.46746 | 4.76E-11 | 1.47E-09 |
| KCNJ3  | -0.3211  | 1.24E-05 | 7.85E-05 |
| KCNJ4  | -0.01789 | 0.812626 | 0.867332 |
| KCNJ5  | -0.28459 | 0.000118 | 0.00055  |
| KCNJ6  | -0.34053 | 3.30E-06 | 2.47E-05 |
| KCNJ8  | -0.2942  | 6.72E-05 | 0.000337 |
| KCNJ9  | 0.035992 | 0.633389 | 0.725141 |
| KCNK10 | -0.08735 | 0.246266 | 0.351246 |
| KCNK12 | -0.28733 | 0.000101 | 0.000478 |
| KCNK13 | -0.13473 | 0.072958 | 0.131632 |
| KCNK15 | 0.336441 | 4.40E-06 | 3.18E-05 |
| KCNK16 | -0.06933 | 0.357784 | 0.470839 |
| KCNK17 | -0.10119 | 0.17895  | 0.271975 |
| KCNK18 | 0.05031  | 0.504827 | 0.611745 |
| KCNK1  | 0.547363 | 2.66E-15 | 2.17E-13 |
| KCNK2  | -0.15693 | 0.036447 | 0.073752 |
| KCNK3  | -0.36681 | 4.75E-07 | 4.54E-06 |
| KCNK4  | 0.100168 | 0.183405 | 0.277415 |
| KCNK5  | 0.395069 | 4.83E-08 | 6.20E-07 |
| KCNK6  | 0.424339 | 3.57E-09 | 6.50E-08 |
| KCNK7  | 0.330668 | 6.54E-06 | 4.50E-05 |
| KCNK9  | -0.14052 | 0.061357 | 0.113752 |
| KCNMA1 | -0.39757 | 3.91E-08 | 5.11E-07 |
| KCNMB1 | 0.139232 | 0.063806 | 0.117586 |
| KCNMB2 | -0.27437 | 0.00021  | 0.000904 |
| KCNMB3 | 0.055299 | 0.46347  | 0.573687 |
| KCNMB4 | 0.169105 | 0.024038 | 0.05188  |
| KCNN1  | -0.06392 | 0.396633 | 0.509353 |

|          |          |          |          |
|----------|----------|----------|----------|
| KCNN2    | -0.42294 | 4.07E-09 | 7.26E-08 |
| KCNN3    | -0.38156 | 1.48E-07 | 1.65E-06 |
| KCNN4    | 0.705129 | 4.47E-28 | 1.10E-24 |
| KCNQ1DN  | 0.060411 | 0.423107 | 0.535354 |
| KCNQ10T1 | 0.147586 | 0.049304 | 0.094903 |
| KCNQ1    | 0.226626 | 0.002351 | 0.007169 |
| KCNQ2    | -0.15131 | 0.04379  | 0.086064 |
| KCNQ3    | -0.0678  | 0.368552 | 0.482057 |
| KCNQ4    | 0.299004 | 5.03E-05 | 0.000264 |
| KCNQ5    | -0.17194 | 0.021735 | 0.047586 |
| KCNRG    | -0.13687 | 0.068496 | 0.124936 |
| KCNS1    | 0.350626 | 1.60E-06 | 1.31E-05 |
| KCNS2    | -0.1063  | 0.157876 | 0.24626  |
| KCNS3    | 0.188051 | 0.011947 | 0.028764 |
| KCNT1    | -0.09299 | 0.216999 | 0.318271 |
| KCNT2    | -0.24953 | 0.000782 | 0.002794 |
| KCNU1    | -0.18058 | 0.015858 | 0.036522 |
| KCNV1    | -0.13041 | 0.082721 | 0.146164 |
| KCNV2    | -0.18556 | 0.013143 | 0.031184 |
| KCP      | 0.682409 | 9.73E-26 | 1.40E-22 |
| KCTD10   | -0.0723  | 0.337546 | 0.449895 |
| KCTD11   | 0.330413 | 6.66E-06 | 4.57E-05 |
| KCTD12   | -0.38732 | 9.24E-08 | 1.09E-06 |
| KCTD13   | 0.021512 | 0.775627 | 0.84049  |
| KCTD14   | 0.394282 | 5.16E-08 | 6.56E-07 |
| KCTD15   | 0.011281 | 0.881196 | 0.917576 |
| KCTD16   | -0.36103 | 7.39E-07 | 6.71E-06 |
| KCTD17   | 0.008693 | 0.90831  | 0.935784 |
| KCTD18   | -0.23124 | 0.001899 | 0.005966 |
| KCTD19   | -0.20718 | 0.005523 | 0.01489  |
| KCTD1    | 0.288488 | 9.42E-05 | 0.00045  |
| KCTD20   | -0.17807 | 0.017405 | 0.039478 |
| KCTD21   | 0.18609  | 0.012882 | 0.030649 |
| KCTD2    | -0.22482 | 0.002552 | 0.007695 |
| KCTD3    | 0.075048 | 0.31944  | 0.431224 |
| KCTD4    | -0.21723 | 0.003584 | 0.010277 |
| KCTD5    | 0.352666 | 1.38E-06 | 1.15E-05 |
| KCTD6    | -0.1813  | 0.015438 | 0.035697 |
| KCTD7    | -0.14228 | 0.058162 | 0.108787 |
| KCTD8    | -0.21932 | 0.003267 | 0.009496 |
| KCTD9    | 0.296338 | 5.91E-05 | 0.000303 |
| KDELC1   | 0.060255 | 0.424309 | 0.536566 |
| KDELC2   | 0.029709 | 0.693826 | 0.775718 |
| KDELR1   | 0.144108 | 0.054969 | 0.103936 |
| KDELR2   | 0.12516  | 0.095986 | 0.164888 |
| KDELR3   | 0.331952 | 5.99E-06 | 4.18E-05 |
| KDM1A    | 0.120922 | 0.107869 | 0.181686 |
| KDM1B    | -0.24945 | 0.000785 | 0.002803 |
| KDM2A    | 0.188642 | 0.011677 | 0.028183 |
| KDM2B    | -0.26601 | 0.000332 | 0.001338 |
| KDM3A    | 0.266015 | 0.000332 | 0.001337 |
| KDM3B    | -0.09318 | 0.216027 | 0.317152 |
| KDM4A    | -0.22608 | 0.002409 | 0.007322 |
| KDM4B    | -0.11588 | 0.123491 | 0.201828 |

|           |          |          |          |
|-----------|----------|----------|----------|
| KDM4C     | -0.20741 | 0.005469 | 0.014762 |
| KDM4DL    | -0.13982 | 0.062686 | 0.115857 |
| KDM4D     | -0.20837 | 0.005253 | 0.014285 |
| KDM5A     | -0.23324 | 0.001729 | 0.005507 |
| KDM5B     | 0.268985 | 0.000283 | 0.001167 |
| KDM5C     | -0.1835  | 0.014217 | 0.033296 |
| KDM5D     | -0.04417 | 0.558276 | 0.659263 |
| KDM6A     | -0.22716 | 0.002294 | 0.007022 |
| KDM6B     | -0.33037 | 6.68E-06 | 4.58E-05 |
| KDR       | -0.32583 | 9.07E-06 | 5.96E-05 |
| KDSR      | -0.08505 | 0.259014 | 0.365368 |
| KEAP1     | 0.150966 | 0.044274 | 0.086834 |
| KEL       | -0.10374 | 0.168206 | 0.259285 |
| KERA      | 0.255096 | 0.000589 | 0.002186 |
| KGFLP1    | -0.31744 | 1.58E-05 | 9.65E-05 |
| KGFLP2    | -0.40765 | 1.63E-08 | 2.39E-07 |
| KHDC1L    | -0.10407 | 0.166848 | 0.257446 |
| KHDC1     | 0.072617 | 0.335408 | 0.447549 |
| KHDRBS1   | 0.100886 | 0.180269 | 0.273571 |
| KHDRBS2   | -0.28403 | 0.000122 | 0.000565 |
| KHDRBS3   | -0.15148 | 0.043554 | 0.085679 |
| KHK       | -0.06922 | 0.358578 | 0.471726 |
| KHNYN     | -0.08234 | 0.274528 | 0.382508 |
| KHSRP     | -0.13256 | 0.077753 | 0.1388   |
| KIAA0020  | 0.106159 | 0.158439 | 0.246865 |
| KIAA0040  | 0.16374  | 0.028967 | 0.060786 |
| KIAA0087  | -0.34883 | 1.82E-06 | 1.47E-05 |
| KIAA0090  | -0.23608 | 0.001512 | 0.004903 |
| KIAA0100  | -0.33348 | 5.40E-06 | 3.81E-05 |
| KIAA0101  | 0.436879 | 1.08E-09 | 2.26E-08 |
| KIAA0114  | -0.2703  | 0.000263 | 0.001097 |
| KIAA0125  | -0.01037 | 0.890765 | 0.923847 |
| KIAA0141  | -0.08309 | 0.270193 | 0.377956 |
| KIAA0146  | -0.00449 | 0.952555 | 0.967776 |
| KIAA0174  | 0.284898 | 0.000116 | 0.000542 |
| KIAA0182  | -0.52478 | 5.51E-14 | 3.46E-12 |
| KIAA0195  | -0.2963  | 5.92E-05 | 0.000303 |
| KIAA0196  | -0.03158 | 0.675563 | 0.761693 |
| KIAA0226  | -0.14575 | 0.052224 | 0.099564 |
| KIAA0232  | -0.32519 | 9.47E-06 | 6.19E-05 |
| KIAA0240  | -0.39924 | 3.38E-08 | 4.52E-07 |
| KIAA0247  | -0.05273 | 0.484556 | 0.593509 |
| KIAA0284  | 0.289569 | 8.84E-05 | 0.000427 |
| KIAA0317  | -0.24965 | 0.000778 | 0.002779 |
| KIAA0319I | -0.20001 | 0.007435 | 0.019191 |
| KIAA0319  | -0.32609 | 8.91E-06 | 5.87E-05 |
| KIAA0355  | -0.34136 | 3.11E-06 | 2.35E-05 |
| KIAA0368  | -0.43774 | 9.96E-10 | 2.12E-08 |
| KIAA0391  | 0.090633 | 0.228916 | 0.331934 |
| KIAA0406  | -0.28336 | 0.000127 | 0.000585 |
| KIAA0408  | -0.19585 | 0.008795 | 0.022127 |
| KIAA0415  | 0.121732 | 0.105514 | 0.178434 |
| KIAA0427  | -0.16161 | 0.031151 | 0.064635 |
| KIAA0430  | -0.19944 | 0.007609 | 0.019573 |

KIAA0467 -0.20846 0.005233 0.014235  
KIAA0494 -0.01522 0.840174 0.8871  
KIAA0495 0.035004 0.642749 0.733568  
KIAA0513 -0.14735 0.049666 0.095451  
KIAA0528 -0.41107 1.20E-08 1.84E-07  
KIAA0556 -0.00044 0.995368 0.996913  
KIAA0562 -0.18608 0.012889 0.030654  
KIAA0564 -0.15951 0.033444 0.06863  
KIAA0586 -0.3124 2.18E-05 0.000127  
KIAA0649 0.122404 0.10359 0.175722  
KIAA0652 -0.23991 0.001258 0.004189  
KIAA0664F 0.019406 0.7971 0.856948  
KIAA0664 -0.05516 0.464598 0.574723  
KIAA0748 -0.02686 0.721921 0.797991  
KIAA0753 -0.24734 0.000873 0.003061  
KIAA0754 -0.01513 0.841143 0.887838  
KIAA0776 -0.38521 1.10E-07 1.27E-06  
KIAA0802 0.022212 0.768537 0.835094  
KIAA0831 -0.01972 0.793876 0.854132  
KIAA0892 -0.19912 0.007707 0.019781  
KIAA0895L -0.04599 0.542139 0.645371  
KIAA0895 -0.22543 0.002483 0.007512  
KIAA0907 0.256666 0.000544 0.002043  
KIAA0913 -0.20298 0.006582 0.017321  
KIAA0922 -0.24416 0.001022 0.003498  
KIAA0947 -0.48373 7.92E-12 2.92E-10  
KIAA1009 -0.312 2.24E-05 0.00013  
KIAA1012 -0.32434 1.00E-05 6.50E-05  
KIAA1024 -0.12592 0.09397 0.162001  
KIAA1033 -0.13987 0.062595 0.115722  
KIAA1045 -0.30078 4.51E-05 0.00024  
KIAA1107 -0.12612 0.093452 0.161264  
KIAA1109 -0.28151 0.000141 0.000641  
KIAA1143 -0.24901 0.000803 0.002857  
KIAA1147 -0.39869 3.55E-08 4.70E-07  
KIAA1161 0.266546 0.000323 0.001307  
KIAA1191 -0.01083 0.885909 0.920642  
KIAA1199 0.431623 1.80E-09 3.51E-08  
KIAA1210 -0.01863 0.805065 0.861997  
KIAA1211 0.121569 0.105983 0.17906  
KIAA1217 0.297403 5.54E-05 0.000286  
KIAA1239 -0.28098 0.000145 0.000657  
KIAA1244 -0.38119 1.53E-07 1.69E-06  
KIAA1257 -0.21836 0.003409 0.009846  
KIAA1267 -0.09831 0.1917 0.287626  
KIAA1274 -0.06254 0.406921 0.519261  
KIAA1279 -0.35913 8.53E-07 7.56E-06  
KIAA1310 -0.13336 0.075956 0.136146  
KIAA1324L -0.29885 5.08E-05 0.000266  
KIAA1324 -0.43223 1.69E-09 3.35E-08  
KIAA1328 -0.3091 2.69E-05 0.000153  
KIAA1370 -0.3644 5.72E-07 5.35E-06  
KIAA1377 -0.37988 1.70E-07 1.86E-06  
KIAA1383 -0.08143 0.279877 0.388262

|           |          |          |          |
|-----------|----------|----------|----------|
| KIAA1407  | 0.092354 | 0.220161 | 0.321907 |
| KIAA1409  | -0.38065 | 1.59E-07 | 1.76E-06 |
| KIAA1429  | -0.18943 | 0.011325 | 0.027471 |
| KIAA1430  | -0.11156 | 0.138193 | 0.221175 |
| KIAA1432  | -0.15426 | 0.039795 | 0.079349 |
| KIAA1462  | -0.12814 | 0.088271 | 0.153989 |
| KIAA1467  | -0.29292 | 7.25E-05 | 0.000359 |
| KIAA1468  | -0.23986 | 0.001261 | 0.004197 |
| KIAA1486  | -0.33511 | 4.82E-06 | 3.45E-05 |
| KIAA1522  | 0.385115 | 1.11E-07 | 1.27E-06 |
| KIAA1524  | 0.159405 | 0.033558 | 0.068828 |
| KIAA1529  | -0.34894 | 1.81E-06 | 1.46E-05 |
| KIAA1530  | 0.094468 | 0.20974  | 0.309715 |
| KIAA1539  | 0.493164 | 2.68E-12 | 1.12E-10 |
| KIAA1543  | 0.161668 | 0.031089 | 0.064528 |
| KIAA1549  | -0.38701 | 9.48E-08 | 1.11E-06 |
| KIAA1586  | -0.37815 | 1.95E-07 | 2.10E-06 |
| KIAA1598  | -0.15914 | 0.033855 | 0.069309 |
| KIAA1609  | 0.519819 | 1.04E-13 | 6.13E-12 |
| KIAA1614  | -0.13142 | 0.080366 | 0.142731 |
| KIAA1632  | -0.48474 | 7.06E-12 | 2.63E-10 |
| KIAA1644  | -0.20404 | 0.006298 | 0.016668 |
| KIAA1671  | -0.08912 | 0.236808 | 0.340729 |
| KIAA1683  | -0.17078 | 0.022655 | 0.0493   |
| KIAA1704  | 0.115778 | 0.123811 | 0.202267 |
| KIAA1712  | -0.09398 | 0.212091 | 0.312441 |
| KIAA1715  | -0.00618 | 0.934795 | 0.955229 |
| KIAA1731  | 0.023659 | 0.753922 | 0.82377  |
| KIAA1737  | -0.18768 | 0.012121 | 0.029116 |
| KIAA1751  | -0.19554 | 0.008904 | 0.022326 |
| KIAA1755  | 0.202015 | 0.006848 | 0.017913 |
| KIAA1797  | -0.3624  | 6.66E-07 | 6.12E-06 |
| KIAA1804  | -0.02413 | 0.749183 | 0.81983  |
| KIAA1826  | -0.33581 | 4.59E-06 | 3.30E-05 |
| KIAA1841  | 0.228771 | 0.00213  | 0.00659  |
| KIAA1875  | 0.109174 | 0.146879 | 0.232333 |
| KIAA1908  | -0.56126 | 3.66E-16 | 3.81E-14 |
| KIAA1919  | -0.20461 | 0.006151 | 0.016331 |
| KIAA1949  | 0.295332 | 6.28E-05 | 0.000318 |
| KIAA1958  | -0.35489 | 1.17E-06 | 9.94E-06 |
| KIAA1967  | 0.024898 | 0.741486 | 0.813615 |
| KIAA1984  | 0.103215 | 0.170368 | 0.261842 |
| KIAA2013  | 0.024688 | 0.743585 | 0.815238 |
| KIAA2018  | -0.26315 | 0.000387 | 0.001526 |
| KIAA2022  | -0.33135 | 6.25E-06 | 4.33E-05 |
| KIAA2026  | -0.29064 | 8.30E-05 | 0.000404 |
| KIDINS22C | -0.24558 | 0.000953 | 0.003294 |
| KIF11     | 0.317256 | 1.60E-05 | 9.74E-05 |
| KIF12     | -0.06896 | 0.360365 | 0.473479 |
| KIF13A    | -0.19063 | 0.010809 | 0.026404 |
| KIF13B    | 0.442761 | 6.08E-10 | 1.38E-08 |
| KIF14     | 0.337367 | 4.12E-06 | 3.00E-05 |
| KIF15     | 0.2978   | 5.41E-05 | 0.00028  |
| KIF16B    | -0.19756 | 0.008209 | 0.020884 |

|         |          |          |          |
|---------|----------|----------|----------|
| KIF17   | -0.21524 | 0.00391  | 0.011101 |
| KIF18A  | 0.286643 | 0.000105 | 0.000495 |
| KIF18B  | 0.387435 | 9.15E-08 | 1.08E-06 |
| KIF19   | -0.31075 | 2.42E-05 | 0.00014  |
| KIF1A   | -0.30518 | 3.44E-05 | 0.00019  |
| KIF1B   | -0.50247 | 8.91E-13 | 4.11E-11 |
| KIF1C   | 0.161381 | 0.031394 | 0.065051 |
| KIF20A  | 0.383985 | 1.22E-07 | 1.38E-06 |
| KIF20B  | 0.148611 | 0.04773  | 0.092404 |
| KIF21A  | -0.26596 | 0.000333 | 0.00134  |
| KIF21B  | -0.0748  | 0.321065 | 0.432915 |
| KIF22   | 0.213267 | 0.00426  | 0.011937 |
| KIF23   | 0.322349 | 1.14E-05 | 7.31E-05 |
| KIF24   | -0.07293 | 0.333348 | 0.445591 |
| KIF25   | -0.08035 | 0.286319 | 0.395369 |
| KIF26A  | -0.18543 | 0.013212 | 0.031318 |
| KIF26B  | 0.354075 | 1.24E-06 | 1.05E-05 |
| KIF27   | -0.30774 | 2.93E-05 | 0.000165 |
| KIF2A   | -0.17315 | 0.020813 | 0.045897 |
| KIF2C   | 0.362169 | 6.78E-07 | 6.21E-06 |
| KIF3A   | -0.39181 | 6.36E-08 | 7.84E-07 |
| KIF3B   | -0.43934 | 8.51E-10 | 1.85E-08 |
| KIF3C   | -0.15083 | 0.044464 | 0.087165 |
| KIF4A   | 0.307014 | 3.07E-05 | 0.000172 |
| KIF4B   | 0.029898 | 0.691979 | 0.774351 |
| KIF5A   | -0.34767 | 1.98E-06 | 1.58E-05 |
| KIF5B   | -0.07805 | 0.300385 | 0.41052  |
| KIF5C   | -0.38616 | 1.02E-07 | 1.18E-06 |
| KIF6    | -0.2782  | 0.00017  | 0.000752 |
| KIF7    | 0.31499  | 1.85E-05 | 0.000111 |
| KIF9    | -0.08136 | 0.280287 | 0.388722 |
| KIFAP3  | -0.20521 | 0.005999 | 0.015979 |
| KIFC1   | 0.408668 | 1.49E-08 | 2.20E-07 |
| KIFC2   | 0.268334 | 0.000293 | 0.001204 |
| KIFC3   | 0.088726 | 0.238901 | 0.343041 |
| KILLIN  | -0.35723 | 9.83E-07 | 8.54E-06 |
| KIN     | 0.109944 | 0.144033 | 0.228599 |
| KIR2DL1 | -0.16904 | 0.024091 | 0.051961 |
| KIR2DL3 | 0.009443 | 0.900447 | 0.930517 |
| KIR2DL4 | -0.08747 | 0.245621 | 0.350478 |
| KIR2DS4 | -0.03289 | 0.662981 | 0.751277 |
| KIR3DL1 | -0.16014 | 0.032738 | 0.067378 |
| KIR3DL2 | -0.08602 | 0.253599 | 0.359757 |
| KIR3DL3 | 0.05236  | 0.487607 | 0.59636  |
| KIR3DP1 | -0.04335 | 0.565596 | 0.666156 |
| KIR3DX1 | -0.02827 | 0.707934 | 0.787328 |
| KIRREL2 | -0.26067 | 0.000441 | 0.001708 |
| KIRREL3 | -0.1063  | 0.157901 | 0.24628  |
| KIRREL  | -0.08442 | 0.262545 | 0.369532 |
| KISS1R  | -0.24584 | 0.00094  | 0.003256 |
| KISS1   | 0.308934 | 2.72E-05 | 0.000155 |
| KITLG   | 0.189006 | 0.011514 | 0.027857 |
| KIT     | -0.17968 | 0.016399 | 0.037588 |
| KLB     | -0.44341 | 5.70E-10 | 1.31E-08 |

|         |          |          |          |
|---------|----------|----------|----------|
| KLC1    | -0.02919 | 0.698966 | 0.779987 |
| KLC2    | -0.14295 | 0.056976 | 0.106963 |
| KLC3    | 0.068345 | 0.364686 | 0.477938 |
| KLC4    | 0.141722 | 0.059157 | 0.110273 |
| KLF10   | -0.16117 | 0.031622 | 0.06542  |
| KLF11   | -0.22091 | 0.003044 | 0.008955 |
| KLF12   | -0.20571 | 0.005873 | 0.015692 |
| KLF13   | -0.23907 | 0.00131  | 0.00433  |
| KLF14   | -0.17269 | 0.021162 | 0.046553 |
| KLF15   | -0.18527 | 0.01329  | 0.031463 |
| KLF16   | 0.224812 | 0.002553 | 0.007698 |
| KLF17   | -0.0388  | 0.607094 | 0.702932 |
| KLF1    | -0.02006 | 0.790411 | 0.851795 |
| KLF2    | 0.423235 | 3.96E-09 | 7.10E-08 |
| KLF3    | 0.283845 | 0.000123 | 0.000571 |
| KLF4    | 0.266973 | 0.000315 | 0.001281 |
| KLF5    | 0.585418 | 9.31E-18 | 1.50E-15 |
| KLF6    | 0.27371  | 0.000218 | 0.000932 |
| KLF7    | 0.119302 | 0.112705 | 0.188039 |
| KLF8    | 0.092274 | 0.220564 | 0.322353 |
| KLF9    | -0.3638  | 5.99E-07 | 5.56E-06 |
| KLHDC10 | -0.39092 | 6.85E-08 | 8.39E-07 |
| KLHDC1  | -0.35196 | 1.45E-06 | 1.20E-05 |
| KLHDC2  | -0.27778 | 0.000174 | 0.000768 |
| KLHDC3  | -0.25033 | 0.000752 | 0.002695 |
| KLHDC4  | 0.170092 | 0.023214 | 0.050372 |
| KLHDC5  | -0.48637 | 5.87E-12 | 2.25E-10 |
| KLHDC7A | 0.237615 | 0.001405 | 0.004603 |
| KLHDC7B | 0.410425 | 1.27E-08 | 1.94E-07 |
| KLHDC8A | -0.11725 | 0.119087 | 0.196268 |
| KLHDC8B | 0.002973 | 0.968578 | 0.978475 |
| KLHDC9  | -0.11164 | 0.1379   | 0.220797 |
| KLHL10  | -0.09858 | 0.190504 | 0.286161 |
| KLHL11  | -0.38263 | 1.36E-07 | 1.52E-06 |
| KLHL12  | -0.00786 | 0.917062 | 0.942319 |
| KLHL13  | -0.38766 | 8.98E-08 | 1.07E-06 |
| KLHL14  | -0.17201 | 0.02168  | 0.047475 |
| KLHL15  | -0.53622 | 1.22E-14 | 8.88E-13 |
| KLHL17  | 0.184262 | 0.01381  | 0.032485 |
| KLHL18  | -0.14115 | 0.060203 | 0.111884 |
| KLHL1   | -0.13079 | 0.081842 | 0.144941 |
| KLHL20  | 0.032164 | 0.669952 | 0.757094 |
| KLHL21  | -0.03633 | 0.63023  | 0.722696 |
| KLHL22  | -0.42017 | 5.26E-09 | 9.04E-08 |
| KLHL23  | -0.19012 | 0.011025 | 0.026854 |
| KLHL24  | -0.20213 | 0.006814 | 0.017838 |
| KLHL25  | 0.126226 | 0.093168 | 0.1609   |
| KLHL26  | -0.10267 | 0.172632 | 0.2645   |
| KLHL28  | -0.23431 | 0.001644 | 0.005278 |
| KLHL29  | -0.20552 | 0.005921 | 0.015807 |
| KLHL2   | -0.30603 | 3.26E-05 | 0.000181 |
| KLHL30  | 0.48684  | 5.56E-12 | 2.14E-10 |
| KLHL31  | -0.04704 | 0.532916 | 0.636922 |
| KLHL32  | -0.50735 | 4.93E-13 | 2.50E-11 |



|        |          |          |          |
|--------|----------|----------|----------|
| KLHL33 | -0.0696  | 0.355928 | 0.468989 |
| KLHL34 | -0.19978 | 0.007504 | 0.019348 |
| KLHL35 | 0.09729  | 0.196382 | 0.293319 |
| KLHL36 | 0.233882 | 0.001677 | 0.005365 |
| KLHL38 | -0.22172 | 0.002936 | 0.008686 |
| KLHL3  | -0.05381 | 0.475608 | 0.585341 |
| KLHL4  | -0.08981 | 0.233186 | 0.337014 |
| KLHL5  | -0.20524 | 0.005992 | 0.015967 |
| KLHL6  | -0.00658 | 0.930516 | 0.952037 |
| KLHL7  | -0.05937 | 0.431132 | 0.543041 |
| KLHL8  | -0.4038  | 2.28E-08 | 3.23E-07 |
| KLHL9  | -0.37168 | 3.25E-07 | 3.28E-06 |
| KLK10  | 0.566855 | 1.61E-16 | 1.86E-14 |
| KLK11  | 0.483866 | 7.80E-12 | 2.88E-10 |
| KLK12  | -0.09189 | 0.222504 | 0.324573 |
| KLK13  | 0.057637 | 0.444754 | 0.556266 |
| KLK14  | -0.06952 | 0.356486 | 0.46963  |
| KLK15  | -0.10229 | 0.174247 | 0.266602 |
| KLK1   | 0.033415 | 0.657914 | 0.746476 |
| KLK2   | 0.166022 | 0.026774 | 0.056885 |
| KLK3   | 0.086933 | 0.248564 | 0.353962 |
| KLK4   | 0.305328 | 3.41E-05 | 0.000189 |
| KLK5   | 0.056246 | 0.455837 | 0.566794 |
| KLK6   | 0.417212 | 6.89E-09 | 1.15E-07 |
| KLK7   | 0.479451 | 1.28E-11 | 4.44E-10 |
| KLK8   | 0.444595 | 5.06E-10 | 1.18E-08 |
| KLK9   | 0.433967 | 1.43E-09 | 2.88E-08 |
| KLKB1  | -0.21016 | 0.004868 | 0.013392 |
| KLKP1  | 0.321741 | 1.19E-05 | 7.56E-05 |
| KLRA1  | -0.055   | 0.465915 | 0.576065 |
| KLRAQ1 | 0.047018 | 0.533134 | 0.637144 |
| KLRB1  | -0.04733 | 0.530426 | 0.634824 |
| KLRC1  | -0.10788 | 0.151766 | 0.238593 |
| KLRC2  | -0.10031 | 0.182791 | 0.276692 |
| KLRC3  | -0.13443 | 0.073611 | 0.132615 |
| KLRC4  | -0.23463 | 0.00162  | 0.005207 |
| KLRD1  | -0.19763 | 0.008187 | 0.020845 |
| KLRF1  | -0.15298 | 0.041486 | 0.0822   |
| KLRG1  | -0.22751 | 0.002257 | 0.006927 |
| KLRG2  | -0.08054 | 0.285178 | 0.394174 |
| KLRK1  | -0.16384 | 0.028864 | 0.06061  |
| KL     | -0.34884 | 1.82E-06 | 1.47E-05 |
| KMO    | 0.01541  | 0.838229 | 0.885817 |
| KNCN   | -0.22825 | 0.002181 | 0.006727 |
| KNDC1  | -0.04695 | 0.53376  | 0.637661 |
| KNG1   | 0.075044 | 0.31946  | 0.431224 |
| KNTC1  | 0.204349 | 0.006218 | 0.016485 |
| KPNA1  | 0.043372 | 0.565393 | 0.665996 |
| KPNA2  | 0.041167 | 0.585339 | 0.68391  |
| KPNA3  | -0.02696 | 0.720933 | 0.797284 |
| KPNA4  | 0.202663 | 0.006667 | 0.017516 |
| KPNA5  | -0.33873 | 3.75E-06 | 2.76E-05 |
| KPNA6  | -0.30935 | 2.65E-05 | 0.000151 |
| KPNA7  | 0.471659 | 3.02E-11 | 9.72E-10 |

|         |          |          |          |
|---------|----------|----------|----------|
| KPNB1   | -0.07841 | 0.298192 | 0.408171 |
| KPRP    | 0.073332 | 0.330659 | 0.442744 |
| KPTN    | 0.06009  | 0.425582 | 0.537841 |
| KRAS    | 0.201313 | 0.007048 | 0.01834  |
| KRBA1   | -0.20016 | 0.007389 | 0.019085 |
| KRBA2   | -0.52438 | 5.80E-14 | 3.62E-12 |
| KRCC1   | -0.0241  | 0.749469 | 0.820008 |
| KREMEN1 | -0.40737 | 1.67E-08 | 2.44E-07 |
| KREMEN2 | 0.185916 | 0.012967 | 0.030805 |
| KRI1    | 0.188009 | 0.011966 | 0.028807 |
| KRIT1   | -0.24634 | 0.000918 | 0.003189 |
| KRR1    | -0.2173  | 0.003573 | 0.010254 |
| KRT10   | -0.11672 | 0.120773 | 0.198303 |
| KRT12   | 0.128006 | 0.088607 | 0.15444  |
| KRT13   | 0.608735 | 1.99E-19 | 5.17E-17 |
| KRT14   | 0.483546 | 8.09E-12 | 2.96E-10 |
| KRT15   | 0.601264 | 7.05E-19 | 1.57E-16 |
| KRT16   | 0.697501 | 2.88E-27 | 5.70E-24 |
| KRT17   | 0.566051 | 1.81E-16 | 2.06E-14 |
| KRT18   | 0.425774 | 3.12E-09 | 5.73E-08 |
| KRT19   | 0.70833  | 2.01E-28 | 5.67E-25 |
| KRT1    | -0.12066 | 0.108647 | 0.18267  |
| KRT20   | 0.085307 | 0.257555 | 0.363882 |
| KRT222  | -0.30768 | 2.94E-05 | 0.000166 |
| KRT23   | 0.275695 | 0.000195 | 0.000849 |
| KRT24   | -0.15925 | 0.033732 | 0.069136 |
| KRT25   | -0.03643 | 0.629245 | 0.721943 |
| KRT27   | -0.10043 | 0.18226  | 0.276024 |
| KRT28   | 0.064066 | 0.39555  | 0.508293 |
| KRT2    | -0.04921 | 0.51417  | 0.620216 |
| KRT31   | -0.00206 | 0.978237 | 0.985106 |
| KRT32   | 0.124068 | 0.098945 | 0.169075 |
| KRT33A  | -0.16618 | 0.026623 | 0.056619 |
| KRT33B  | 0.203625 | 0.006407 | 0.016913 |
| KRT34   | 0.064944 | 0.389091 | 0.501622 |
| KRT35   | -0.01193 | 0.874426 | 0.913026 |
| KRT36   | 0.016006 | 0.832059 | 0.881025 |
| KRT37   | 0.090084 | 0.231763 | 0.335324 |
| KRT38   | -0.01871 | 0.804189 | 0.861571 |
| KRT39   | -0.1561  | 0.037463 | 0.075415 |
| KRT3    | 0.209591 | 0.004987 | 0.013669 |
| KRT40   | -0.25987 | 0.00046  | 0.001768 |
| KRT4    | 0.365404 | 5.30E-07 | 5.00E-06 |
| KRT5    | 0.268324 | 0.000293 | 0.001204 |
| KRT6A   | 0.48129  | 1.04E-11 | 3.71E-10 |
| KRT6B   | 0.426085 | 3.03E-09 | 5.60E-08 |
| KRT6C   | 0.44034  | 7.72E-10 | 1.70E-08 |
| KRT71   | 0.039862 | 0.597295 | 0.694269 |
| KRT72   | -0.08714 | 0.247437 | 0.352585 |
| KRT73   | -0.08323 | 0.269369 | 0.377045 |
| KRT74   | 0.059263 | 0.431992 | 0.543917 |
| KRT75   | -0.01509 | 0.841509 | 0.888178 |
| KRT76   | 0.066648 | 0.376743 | 0.489462 |
| KRT77   | 0.051431 | 0.495373 | 0.60332  |

|            |          |          |          |
|------------|----------|----------|----------|
| KRT78      | 0.332722 | 5.69E-06 | 3.98E-05 |
| KRT79      | 0.404323 | 2.18E-08 | 3.09E-07 |
| KRT7       | 0.586442 | 7.91E-18 | 1.31E-15 |
| KRT80      | 0.369773 | 3.78E-07 | 3.74E-06 |
| KRT81      | 0.109206 | 0.146762 | 0.232203 |
| KRT82      | 0.078416 | 0.298138 | 0.408147 |
| KRT83      | 0.144616 | 0.054109 | 0.102594 |
| KRT84      | 0.07152  | 0.342777 | 0.455057 |
| KRT85      | -0.10766 | 0.152601 | 0.239639 |
| KRT86      | 0.114638 | 0.127579 | 0.207327 |
| KRT8       | 0.512141 | 2.73E-13 | 1.46E-11 |
| KRT9       | 0.360361 | 7.77E-07 | 7.00E-06 |
| KRTAP1-1   | -0.02178 | 0.772949 | 0.838414 |
| KRTAP1-3   | 0.017881 | 0.81273  | 0.867339 |
| KRTAP1-5   | 0.015261 | 0.839777 | 0.88687  |
| KRTAP10-1  | -0.07872 | 0.296272 | 0.406247 |
| KRTAP10-10 | 0.019768 | 0.793399 | 0.853665 |
| KRTAP10-1  | -0.05261 | 0.485563 | 0.594485 |
| KRTAP10-10 | 0.156152 | 0.037394 | 0.075314 |
| KRTAP10-2  | -0.06529 | 0.386594 | 0.499347 |
| KRTAP10-3  | -0.18189 | 0.0151   | 0.035055 |
| KRTAP10-4  | -0.15364 | 0.040606 | 0.080729 |
| KRTAP10-6  | -0.13338 | 0.07591  | 0.136087 |
| KRTAP11-1  | -0.02586 | 0.731829 | 0.806104 |
| KRTAP12-1  | -0.04709 | 0.532499 | 0.636655 |
| KRTAP12-2  | -0.09335 | 0.215215 | 0.316124 |
| KRTAP13-2  | -0.11022 | 0.143018 | 0.227352 |
| KRTAP2-1   | 0.06201  | 0.410918 | 0.523019 |
| KRTAP2-2   | 0.009496 | 0.899883 | 0.930178 |
| KRTAP21-2  | -0.05093 | 0.499545 | 0.606831 |
| KRTAP3-1   | 0.029846 | 0.692487 | 0.774673 |
| KRTAP3-2   | -0.17831 | 0.01725  | 0.039194 |
| KRTAP3-3   | -0.29864 | 5.14E-05 | 0.000269 |
| KRTAP4-11  | -0.06254 | 0.406889 | 0.519253 |
| KRTAP4-12  | -0.08439 | 0.262747 | 0.369739 |
| KRTAP4-1   | 0.001803 | 0.980944 | 0.986818 |
| KRTAP4-2   | -0.00257 | 0.972816 | 0.981603 |
| KRTAP4-3   | 0.033767 | 0.654539 | 0.743586 |
| KRTAP4-7   | -0.05142 | 0.495458 | 0.603375 |
| KRTAP4-8   | -0.14319 | 0.056554 | 0.106342 |
| KRTAP4-9   | -0.05455 | 0.469592 | 0.579596 |
| KRTAP5-10  | 0.14698  | 0.050256 | 0.096387 |
| KRTAP5-11  | 0.003983 | 0.95792  | 0.971181 |
| KRTAP5-1   | 0.138159 | 0.065899 | 0.120924 |
| KRTAP5-2   | -0.06914 | 0.359086 | 0.472183 |
| KRTAP5-3   | 0.099874 | 0.184703 | 0.278952 |
| KRTAP5-4   | -0.0813  | 0.280685 | 0.389082 |
| KRTAP5-5   | -0.24255 | 0.001106 | 0.003744 |
| KRTAP5-6   | 0.015874 | 0.833424 | 0.881904 |
| KRTAP5-7   | 0.107467 | 0.153341 | 0.240648 |
| KRTAP5-8   | 0.125997 | 0.093768 | 0.161738 |
| KRTAP5-9   | 0.228945 | 0.002113 | 0.006542 |
| KRTAP7-1   | -0.20567 | 0.005884 | 0.01572  |
| KRTAP8-1   | -0.01037 | 0.890769 | 0.923847 |

|         |          |          |          |
|---------|----------|----------|----------|
| KRTCAP2 | 0.196277 | 0.008645 | 0.021803 |
| KRTCAP3 | 0.530239 | 2.70E-14 | 1.84E-12 |
| KRTDAP  | 0.13911  | 0.06404  | 0.117962 |
| KSR1    | -0.36398 | 5.91E-07 | 5.50E-06 |
| KSR2    | -0.40164 | 2.75E-08 | 3.78E-07 |
| KTELC1  | -0.14956 | 0.046312 | 0.090117 |
| KTI12   | -0.16463 | 0.02809  | 0.05921  |
| KTN1    | -0.01681 | 0.823711 | 0.875114 |
| KYNU    | 0.461106 | 9.34E-11 | 2.64E-09 |
| KY      | -0.0176  | 0.815636 | 0.869573 |
| L1CAM   | -0.09644 | 0.20033  | 0.298225 |
| L1TD1   | 0.075563 | 0.31612  | 0.427386 |
| L2HGDH  | -0.19514 | 0.009045 | 0.022635 |
| L3MBTL2 | -0.12082 | 0.108173 | 0.182044 |
| L3MBTL3 | 0.196489 | 0.008571 | 0.02166  |
| L3MBTL4 | -0.01513 | 0.841091 | 0.887831 |
| L3MBTL  | 0.06843  | 0.364087 | 0.477355 |
| LACE1   | -0.1213  | 0.106754 | 0.180192 |
| LACTB2  | 0.283485 | 0.000126 | 0.000581 |
| LACTB   | 0.244677 | 0.000996 | 0.003425 |
| LAD1    | 0.556033 | 7.81E-16 | 7.43E-14 |
| LAG3    | -0.0896  | 0.234273 | 0.338296 |
| LAGE3   | -0.04144 | 0.582823 | 0.681655 |
| LAIR1   | 0.054188 | 0.472514 | 0.582367 |
| LAIR2   | 0.011933 | 0.874385 | 0.913026 |
| LALBA   | 0.04671  | 0.535828 | 0.639359 |
| LAMA1   | -0.19756 | 0.008209 | 0.020884 |
| LAMA2   | 0.026201 | 0.728465 | 0.803339 |
| LAMA3   | 0.522641 | 7.26E-14 | 4.39E-12 |
| LAMA4   | 0.040461 | 0.591794 | 0.689253 |
| LAMA5   | 0.233119 | 0.001739 | 0.005533 |
| LAMB1   | -0.13993 | 0.062477 | 0.11558  |
| LAMB2L  | -0.01148 | 0.879136 | 0.916068 |
| LAMB2   | 0.398957 | 3.47E-08 | 4.61E-07 |
| LAMB3   | 0.62441  | 1.25E-20 | 4.32E-18 |
| LAMB4   | -0.44317 | 5.83E-10 | 1.33E-08 |
| LAMC1   | 0.038767 | 0.607416 | 0.703182 |
| LAMC2   | 0.580071 | 2.15E-17 | 3.18E-15 |
| LAMC3   | -0.05148 | 0.494966 | 0.603048 |
| LAMP1   | 0.03366  | 0.655567 | 0.744583 |
| LAMP2   | -0.29819 | 5.28E-05 | 0.000275 |
| LAMP3   | 0.179703 | 0.016385 | 0.037562 |
| LANCL1  | -0.11719 | 0.119252 | 0.196474 |
| LANCL2  | -0.5008  | 1.09E-12 | 4.98E-11 |
| LANCL3  | 0.49909  | 1.33E-12 | 6.06E-11 |
| LAP3    | 0.022068 | 0.76999  | 0.836352 |
| LAPTM4A | 0.270186 | 0.000265 | 0.001102 |
| LAPTM4B | 0.030882 | 0.682385 | 0.766968 |
| LAPTM5  | 0.082339 | 0.274542 | 0.382508 |
| LARGE   | -0.27333 | 0.000223 | 0.000949 |
| LARP1B  | -0.24092 | 0.001197 | 0.004009 |
| LARP1   | -0.19949 | 0.007591 | 0.019536 |
| LARP4B  | 0.088811 | 0.238449 | 0.342542 |
| LARP4   | -0.34556 | 2.31E-06 | 1.80E-05 |

|         |          |          |          |
|---------|----------|----------|----------|
| LARP6   | 0.010145 | 0.893089 | 0.925331 |
| LARP7   | -0.14066 | 0.061108 | 0.113342 |
| LARS2   | -0.15724 | 0.03607  | 0.0731   |
| LARS    | -0.25533 | 0.000582 | 0.002165 |
| LAS1L   | 0.049732 | 0.509742 | 0.616303 |
| LASP1   | 0.301796 | 4.24E-05 | 0.000228 |
| LASS1   | -0.25614 | 0.000559 | 0.002088 |
| LASS2   | 0.180844 | 0.015705 | 0.036223 |
| LASS3   | -0.3246  | 9.85E-06 | 6.41E-05 |
| LASS4   | -0.32909 | 7.28E-06 | 4.93E-05 |
| LASS5   | 0.00873  | 0.907926 | 0.935747 |
| LASS6   | -0.0671  | 0.373527 | 0.486612 |
| LAT2    | -0.13213 | 0.078717 | 0.140254 |
| LATS1   | -0.22903 | 0.002105 | 0.00652  |
| LATS2   | 0.156615 | 0.036826 | 0.074405 |
| LAT     | 0.071256 | 0.34457  | 0.456855 |
| LAX1    | -0.15224 | 0.042487 | 0.083913 |
| LAYN    | 0.195666 | 0.008858 | 0.022238 |
| LBH     | 0.083032 | 0.27051  | 0.378266 |
| LBP     | -0.09873 | 0.189824 | 0.285313 |
| LBR     | 0.096786 | 0.198717 | 0.296273 |
| LBX1    | 0.034514 | 0.647412 | 0.737232 |
| LBX2    | 0.422526 | 4.23E-09 | 7.51E-08 |
| LBXCOR1 | -0.13144 | 0.080311 | 0.142647 |
| LCA5L   | -0.31185 | 2.26E-05 | 0.000131 |
| LCA5    | -0.17759 | 0.017712 | 0.040076 |
| LCAT    | 0.333225 | 5.49E-06 | 3.86E-05 |
| LCE1A   | 0.045373 | 0.547576 | 0.650065 |
| LCE1B   | -0.0071  | 0.925067 | 0.94813  |
| LCE1C   | 0.078907 | 0.295115 | 0.40497  |
| LCE1D   | -0.09973 | 0.185361 | 0.279775 |
| LCE1E   | 0.192649 | 0.009986 | 0.024667 |
| LCE1F   | -0.03406 | 0.651719 | 0.74068  |
| LCE2A   | -0.05344 | 0.478687 | 0.588325 |
| LCE2C   | 0.049635 | 0.510566 | 0.61696  |
| LCE3A   | 0.01664  | 0.825511 | 0.876446 |
| LCE3D   | 0.15964  | 0.033293 | 0.06841  |
| LCE3E   | 0.143124 | 0.056666 | 0.106514 |
| LCE5A   | -0.06672 | 0.376237 | 0.4891   |
| LCK     | 0.131598 | 0.079947 | 0.142114 |
| LCLAT1  | 0.007012 | 0.925989 | 0.948806 |
| LCMT1   | -0.07408 | 0.325726 | 0.437769 |
| LCMT2   | -0.20618 | 0.00576  | 0.015446 |
| LCN10   | -0.20933 | 0.005043 | 0.013792 |
| LCN12   | -0.04375 | 0.56199  | 0.662857 |
| LCN15   | -0.06282 | 0.404797 | 0.517384 |
| LCN1    | 0.032723 | 0.664569 | 0.752516 |
| LCN2    | 0.443068 | 5.89E-10 | 1.35E-08 |
| LCN6    | -0.19928 | 0.007658 | 0.01968  |
| LCN8    | -0.10031 | 0.182801 | 0.276692 |
| LCNL1   | 0.131207 | 0.080855 | 0.14347  |
| LCORL   | -0.07458 | 0.322492 | 0.434328 |
| LCOR    | -0.12533 | 0.09552  | 0.164259 |
| LCP1    | -0.06519 | 0.387319 | 0.500023 |

|          |          |          |          |
|----------|----------|----------|----------|
| LCP2     | -0.04474 | 0.553187 | 0.655013 |
| LCTL     | -0.03476 | 0.645049 | 0.735255 |
| LCT      | -0.0661  | 0.380698 | 0.493488 |
| LDB1     | -0.15008 | 0.045543 | 0.088947 |
| LDB2     | -0.25675 | 0.000541 | 0.002035 |
| LDB3     | -0.16264 | 0.030081 | 0.062818 |
| LDHAL6A  | -0.13375 | 0.075105 | 0.134939 |
| LDHAL6B  | 0.304679 | 3.55E-05 | 0.000195 |
| LDHA     | 0.504491 | 6.98E-13 | 3.32E-11 |
| LDHB     | -0.15702 | 0.036331 | 0.073547 |
| LDHC     | 0.00441  | 0.953415 | 0.968302 |
| LDHD     | 0.322346 | 1.14E-05 | 7.31E-05 |
| LDLRAD1  | -0.02816 | 0.709099 | 0.788092 |
| LDLRAD2  | 0.431851 | 1.76E-09 | 3.46E-08 |
| LDLRAD3  | -0.05234 | 0.48777  | 0.596411 |
| LDLRAP1  | -0.26359 | 0.000378 | 0.001495 |
| LDLR     | 0.531754 | 2.21E-14 | 1.52E-12 |
| LDL1L    | -0.24428 | 0.001016 | 0.003482 |
| LDL1     | -0.20577 | 0.005859 | 0.015668 |
| LEAP2    | 0.00503  | 0.946873 | 0.964133 |
| LECT1    | -0.07191 | 0.340164 | 0.452469 |
| LECT2    | 0.086165 | 0.252787 | 0.358812 |
| LEF1     | 0.306312 | 3.21E-05 | 0.000179 |
| LEFTY1   | 0.116923 | 0.120114 | 0.197516 |
| LEFTY2   | 0.032427 | 0.667418 | 0.754791 |
| LEKR1    | -0.18538 | 0.013237 | 0.031363 |
| LEMD1    | 0.636847 | 1.23E-21 | 6.43E-19 |
| LEMD2    | -0.03594 | 0.633862 | 0.72564  |
| LEMD3    | -0.32456 | 9.88E-06 | 6.43E-05 |
| LENEP    | 0.071136 | 0.345384 | 0.457718 |
| LENG1    | -0.00168 | 0.982277 | 0.987672 |
| LENG8    | 0.132686 | 0.077465 | 0.138411 |
| LENG9    | 0.270908 | 0.000255 | 0.001065 |
| LEO1     | -0.08516 | 0.25838  | 0.364891 |
| LEPRE1   | -0.01421 | 0.850697 | 0.895484 |
| LEPREL1  | 0.434207 | 1.40E-09 | 2.83E-08 |
| LEPREL2  | -0.09336 | 0.215157 | 0.316086 |
| LEPROTL1 | 0.099176 | 0.187806 | 0.282858 |
| LEPROT   | -0.11381 | 0.130364 | 0.210961 |
| LEPR     | -0.15478 | 0.03912  | 0.078229 |
| LEP      | -0.21352 | 0.004213 | 0.01183  |
| LETM1    | 0.028409 | 0.706594 | 0.786368 |
| LETM2    | 0.405716 | 1.93E-08 | 2.78E-07 |
| LETMD1   | -0.14862 | 0.047717 | 0.092387 |
| LFNG     | 0.42362  | 3.82E-09 | 6.88E-08 |
| LGALS12  | -0.04639 | 0.538596 | 0.641771 |
| LGALS13  | 0.027261 | 0.717938 | 0.795014 |
| LGALS14  | 0.077289 | 0.305156 | 0.415493 |
| LGALS1   | 0.373985 | 2.71E-07 | 2.80E-06 |
| LGALS2   | 0.043255 | 0.566442 | 0.666756 |
| LGALS3BP | 0.414134 | 9.12E-09 | 1.46E-07 |
| LGALS3   | 0.593734 | 2.45E-18 | 4.79E-16 |
| LGALS4   | 0.420866 | 4.93E-09 | 8.56E-08 |
| LGALS7B  | 0.166446 | 0.026382 | 0.056168 |

|         |          |          |          |
|---------|----------|----------|----------|
| LGALS7  | 0.220375 | 0.003118 | 0.009129 |
| LGALS8  | 0.177967 | 0.01747  | 0.039594 |
| LGALS9B | 0.102    | 0.17548  | 0.267867 |
| LGALS9C | 0.307156 | 3.04E-05 | 0.000171 |
| LGALS9  | 0.543307 | 4.66E-15 | 3.67E-13 |
| LGI1    | -0.17855 | 0.017096 | 0.038889 |
| LGI2    | -0.43025 | 2.05E-09 | 3.94E-08 |
| LGI3    | -0.22501 | 0.002531 | 0.007642 |
| LGI4    | 0.026464 | 0.725857 | 0.801401 |
| LGMN    | 0.202285 | 0.006772 | 0.017752 |
| LGR4    | 0.10836  | 0.149934 | 0.236264 |
| LGR5    | 0.198929 | 0.007768 | 0.019912 |
| LGR6    | 0.536592 | 1.16E-14 | 8.48E-13 |
| LGSN    | -0.16047 | 0.032373 | 0.066778 |
| LGTN    | 0.006223 | 0.934295 | 0.954866 |
| LHB     | 0.479204 | 1.32E-11 | 4.54E-10 |
| LHCGR   | -0.07384 | 0.327297 | 0.439195 |
| LHFPL1  | -0.39589 | 4.51E-08 | 5.81E-07 |
| LHFPL2  | 0.064075 | 0.395483 | 0.508239 |
| LHFPL3  | -0.01238 | 0.869766 | 0.91018  |
| LHFPL4  | -0.19814 | 0.00802  | 0.020483 |
| LHFPL5  | -0.17201 | 0.021682 | 0.047475 |
| LHFP    | -0.11513 | 0.125958 | 0.205231 |
| LHPP    | 0.104395 | 0.165506 | 0.255702 |
| LHX1    | 0.226514 | 0.002363 | 0.007202 |
| LHX2    | -0.21592 | 0.003796 | 0.010817 |
| LHX3    | -0.05374 | 0.476199 | 0.585815 |
| LHX4    | -0.2019  | 0.00688  | 0.017992 |
| LHX5    | 0.018826 | 0.803033 | 0.861147 |
| LHX6    | -0.20244 | 0.00673  | 0.01766  |
| LHX8    | -0.19865 | 0.007855 | 0.020115 |
| LHX9    | 0.173126 | 0.020833 | 0.045937 |
| LIAS    | -0.28515 | 0.000114 | 0.000535 |
| LIFR    | -0.36153 | 7.12E-07 | 6.49E-06 |
| LIF     | 0.394842 | 4.93E-08 | 6.30E-07 |
| LIG1    | 0.088363 | 0.240834 | 0.345216 |
| LIG3    | -0.13664 | 0.068951 | 0.125652 |
| LIG4    | -0.14825 | 0.048274 | 0.09321  |
| LILRA1  | -0.19726 | 0.008309 | 0.021095 |
| LILRA2  | 0.10153  | 0.17749  | 0.27017  |
| LILRA3  | -0.0148  | 0.844504 | 0.890388 |
| LILRA4  | 0.090054 | 0.231918 | 0.3355   |
| LILRA5  | 0.059633 | 0.429116 | 0.54108  |
| LILRA6  | 0.044817 | 0.552495 | 0.654546 |
| LILRB1  | -0.08246 | 0.273832 | 0.381913 |
| LILRB2  | -0.06555 | 0.38464  | 0.497425 |
| LILRB3  | 0.089475 | 0.234944 | 0.338935 |
| LILRB4  | 0.069645 | 0.35561  | 0.468664 |
| LILRB5  | -0.22024 | 0.003137 | 0.009171 |
| LILRP2  | 0.030515 | 0.685954 | 0.769919 |
| LIM2    | 0.010221 | 0.892287 | 0.924939 |
| LIMA1   | 0.261057 | 0.000432 | 0.001679 |
| LIMCH1  | -0.37678 | 2.17E-07 | 2.31E-06 |
| LIMD1   | -0.21565 | 0.00384  | 0.010929 |

|           |          |          |          |
|-----------|----------|----------|----------|
| LIMD2     | 0.023571 | 0.754813 | 0.824441 |
| LIME1     | 0.539502 | 7.84E-15 | 5.90E-13 |
| LIMK1     | 0.295232 | 6.32E-05 | 0.00032  |
| LIMK2     | 0.027745 | 0.713148 | 0.791391 |
| LIMS1     | 0.047052 | 0.53284  | 0.636903 |
| LIMS2     | 0.163905 | 0.028804 | 0.060495 |
| LIMS3-LOC | 0.055529 | 0.461609 | 0.571921 |
| LIMS3     | -0.0043  | 0.954594 | 0.968802 |
| LIN28A    | -0.07584 | 0.314365 | 0.425362 |
| LIN28B    | -0.11546 | 0.12485  | 0.203745 |
| LIN37     | 0.120055 | 0.110439 | 0.185132 |
| LIN52     | -0.3745  | 2.61E-07 | 2.70E-06 |
| LIN54     | -0.37147 | 3.31E-07 | 3.32E-06 |
| LIN7A     | -0.18993 | 0.011107 | 0.027024 |
| LIN7B     | -0.19691 | 0.008427 | 0.02135  |
| LIN7C     | -0.0204  | 0.786983 | 0.849134 |
| LIN9      | 0.223636 | 0.002693 | 0.008058 |
| LING01    | -0.07729 | 0.305165 | 0.415493 |
| LING02    | -0.2373  | 0.001426 | 0.004664 |
| LING03    | -0.1835  | 0.014215 | 0.033296 |
| LING04    | -0.32084 | 1.26E-05 | 7.95E-05 |
| LINS1     | 0.036924 | 0.624613 | 0.718296 |
| LIPA      | -0.06177 | 0.412754 | 0.524739 |
| LIPC      | 0.017521 | 0.816434 | 0.870071 |
| LIPE      | -0.07761 | 0.303129 | 0.413471 |
| LIPF      | -0.02116 | 0.77918  | 0.843046 |
| LIPG      | 0.018708 | 0.80424  | 0.861579 |
| LIPH      | 0.474084 | 2.32E-11 | 7.59E-10 |
| LIPJ      | -0.01551 | 0.837243 | 0.88514  |
| LIPK      | -0.25485 | 0.000597 | 0.002208 |
| LIPM      | 0.094026 | 0.211889 | 0.312235 |
| LIPN      | 0.104471 | 0.165199 | 0.255347 |
| LIPN      | 0.022056 | 0.770112 | 0.836405 |
| LIPT1     | -0.06112 | 0.417676 | 0.52994  |
| LIPT2     | -0.05707 | 0.449263 | 0.560276 |
| LITAF     | 0.138107 | 0.066001 | 0.121078 |
| LIX1L     | 0.016338 | 0.828631 | 0.878806 |
| LIX1      | -0.07217 | 0.338431 | 0.450619 |
| LLGL1     | -0.12344 | 0.100689 | 0.171551 |
| LLGL2     | 0.22191  | 0.002911 | 0.008622 |
| LLPH      | 0.100804 | 0.180626 | 0.27405  |
| LMAN1L    | 0.031754 | 0.673924 | 0.760279 |
| LMAN1     | -0.36336 | 6.19E-07 | 5.73E-06 |
| LMAN2L    | -0.08857 | 0.23973  | 0.344032 |
| LMAN2     | 0.165345 | 0.027409 | 0.057991 |
| LMBR1L    | -0.10551 | 0.160994 | 0.250118 |
| LMBR1     | -0.33562 | 4.66E-06 | 3.34E-05 |
| LMBRD1    | -0.26717 | 0.000312 | 0.001269 |
| LMBRD2    | -0.30553 | 3.37E-05 | 0.000187 |
| LMCD1     | -0.02334 | 0.757096 | 0.82625  |
| LMF1      | 0.179749 | 0.016357 | 0.03751  |
| LMF2      | -0.03173 | 0.674195 | 0.760411 |
| MLN       | -0.16125 | 0.031539 | 0.065289 |
| LMNA      | 0.416261 | 7.52E-09 | 1.23E-07 |



|           |          |          |          |
|-----------|----------|----------|----------|
| LMNB1     | 0.162832 | 0.029881 | 0.062473 |
| LMNB2     | 0.269192 | 0.00028  | 0.001155 |
| LMO1      | -0.06112 | 0.417674 | 0.52994  |
| LMO2      | -0.06728 | 0.372217 | 0.485279 |
| LMO3      | -0.23565 | 0.001543 | 0.004992 |
| LMO4      | 0.411818 | 1.12E-08 | 1.74E-07 |
| LMO7      | 0.57351  | 5.91E-17 | 7.95E-15 |
| LMOD1     | 0.054473 | 0.470186 | 0.580293 |
| LMOD2     | -0.00349 | 0.963164 | 0.974898 |
| LMOD3     | 0.178541 | 0.017105 | 0.038905 |
| LMTK2     | -0.17349 | 0.02056  | 0.045467 |
| LMTK3     | 0.290369 | 8.43E-05 | 0.00041  |
| LMX1A     | -0.20101 | 0.007137 | 0.01851  |
| LMX1B     | -0.08835 | 0.240889 | 0.34527  |
| LNP1      | -0.46745 | 4.76E-11 | 1.47E-09 |
| LNPEP     | -0.20554 | 0.005915 | 0.015794 |
| LNX1      | -0.08623 | 0.252416 | 0.358312 |
| LNX2      | -0.00298 | 0.968517 | 0.978463 |
| LOC100009 | 0.066099 | 0.380691 | 0.493488 |
| LOC100101 | -0.00846 | 0.910798 | 0.937636 |
| LOC100101 | -0.12589 | 0.094042 | 0.162098 |
| LOC100124 | -0.12928 | 0.085452 | 0.150065 |
| LOC100125 | 0.067774 | 0.368715 | 0.482239 |
| LOC100126 | 0.295441 | 6.24E-05 | 0.000316 |
| LOC100127 | 0.29195  | 7.68E-05 | 0.000378 |
| LOC100128 | -0.11987 | 0.110999 | 0.185881 |
| LOC100128 | -0.02264 | 0.764182 | 0.831919 |
| LOC100128 | -0.2601  | 0.000454 | 0.001751 |
| LOC100128 | -0.18874 | 0.011632 | 0.028092 |
| LOC100128 | 0.108    | 0.151302 | 0.238014 |
| LOC100128 | -0.28381 | 0.000124 | 0.000572 |
| LOC100128 | -0.0927  | 0.218438 | 0.320026 |
| LOC100128 | -0.08557 | 0.256113 | 0.362492 |
| LOC100128 | -0.02404 | 0.750112 | 0.82062  |
| LOC100128 | -0.06647 | 0.378025 | 0.490763 |
| LOC100128 | -0.18132 | 0.015428 | 0.035686 |
| LOC100128 | -0.17715 | 0.018001 | 0.04061  |
| LOC100128 | -0.06329 | 0.401274 | 0.513945 |
| LOC100128 | -0.25377 | 0.000631 | 0.002311 |
| LOC100128 | -0.14534 | 0.052906 | 0.100618 |
| LOC100128 | 0.103229 | 0.170308 | 0.26179  |
| LOC100128 | -0.23094 | 0.001925 | 0.006037 |
| LOC100129 | 0.030186 | 0.689166 | 0.772406 |
| LOC100129 | 0.096086 | 0.202002 | 0.300329 |
| LOC100129 | -0.31747 | 1.57E-05 | 9.64E-05 |
| LOC100129 | -0.23602 | 0.001516 | 0.004915 |
| LOC100129 | -0.17102 | 0.022459 | 0.048937 |
| LOC100129 | -0.23363 | 0.001697 | 0.005421 |
| LOC100129 | -0.04965 | 0.51043  | 0.616833 |
| LOC100129 | -0.03853 | 0.609647 | 0.705103 |
| LOC100129 | -0.14455 | 0.054227 | 0.102748 |
| LOC100129 | -0.20511 | 0.006023 | 0.016026 |
| LOC100130 | 0.104062 | 0.16687  | 0.257446 |
| LOC100130 | -0.3578  | 9.43E-07 | 8.23E-06 |

LOC100130 -0.33138 6.23E-06 4.32E-05  
LOC100130 0.187765 0.01208 0.029037  
LOC100130 0.039042 0.604869 0.701012  
LOC100130 0.194217 0.009385 0.023386  
LOC100130 -0.14925 0.046765 0.090838  
LOC100130 -0.31314 2.08E-05 0.000123  
LOC100130 -0.36848 4.18E-07 4.06E-06  
LOC100130 -0.10839 0.14984 0.236166  
LOC100130 0.206762 0.005621 0.015123  
LOC100130 -0.2211 0.003019 0.008896  
LOC100130 0.222658 0.002815 0.008369  
LOC100130 0.36128 7.25E-07 6.59E-06  
LOC100130 0.408362 1.53E-08 2.26E-07  
LOC100130 0.067954 0.36744 0.481017  
LOC100130 0.11383 0.130303 0.210904  
LOC100131 -0.26545 0.000342 0.001373  
LOC100131 -0.0139 0.853907 0.897851  
LOC100131 0.249052 0.000801 0.002852  
LOC100131 0.375319 2.44E-07 2.56E-06  
LOC100131 -0.00243 0.974316 0.982514  
LOC100131 0.5515 1.49E-15 1.31E-13  
LOC100132 -0.03745 0.619717 0.713911  
LOC100132 0.17377 0.020356 0.045079  
LOC100132 0.142721 0.057373 0.107606  
LOC100132 0.089286 0.23594 0.339922  
LOC100132 0.132947 0.076877 0.137502  
LOC100132 -0.13262 0.077618 0.138622  
LOC100132 -0.05134 0.496106 0.603696  
LOC100132 -0.0597 0.42857 0.540564  
LOC100132 -0.09614 0.201726 0.299965  
LOC100132 -0.01392 0.85371 0.8977  
LOC100133 -0.1354 0.071537 0.129622  
LOC100133 0.101659 0.176937 0.269529  
LOC100133 -0.03455 0.6471 0.73704  
LOC100133 0.026497 0.725522 0.801121  
LOC100133 -0.08578 0.254908 0.361277  
LOC100133 0.157314 0.035983 0.07297  
LOC100133 0.160703 0.032122 0.066323  
LOC100133 0.216027 0.003778 0.010778  
LOC100133 -0.33414 5.16E-06 3.66E-05  
LOC100133 0.048837 0.517399 0.623237  
LOC100133 -0.1406 0.061211 0.113518  
LOC100133 -0.25023 0.000755 0.002706  
LOC100133 0.085584 0.256007 0.362446  
LOC100134 -0.01797 0.811861 0.866799  
LOC100134 -0.00869 0.908315 0.935784  
LOC100134 -0.0368 0.625807 0.719376  
LOC100134 -0.07645 0.310483 0.421032  
LOC100134 -0.04382 0.561377 0.662371  
LOC100144 -0.12727 0.090479 0.157065  
LOC100144 -0.14875 0.047515 0.092105  
LOC100170 -0.18676 0.012555 0.030002  
LOC100188 0.027327 0.717292 0.794651  
LOC100188 0.021188 0.778919 0.842902

LOC100189 0.214566 0.004027 0.011389  
LOC10019C -0.31779 1.54E-05 9.46E-05  
LOC10019C 0.07402 0.326129 0.438162  
LOC10019C -0.1825 0.014763 0.0344  
LOC10019C 0.036574 0.627904 0.720864  
LOC100192 0.005352 0.943472 0.961996  
LOC100192 -0.0663 0.379276 0.491983  
LOC100192 -0.02581 0.732365 0.806381  
LOC100216 0.349038 1.80E-06 1.45E-05  
LOC100216 -0.00194 0.979458 0.985789  
LOC100233 0.076855 0.307893 0.418356  
LOC10024C -0.11384 0.130286 0.210894  
LOC10024C 0.053072 0.481693 0.591078  
LOC10024C 0.081983 0.276633 0.384544  
LOC100268 -0.13406 0.07441 0.133868  
LOC10027C 0.386429 9.95E-08 1.16E-06  
LOC10027C -0.02417 0.748747 0.819498  
LOC10027C -0.13912 0.064028 0.117951  
LOC100271 0.324429 9.96E-06 6.47E-05  
LOC100271 0.208964 0.005122 0.013985  
LOC100271 0.106665 0.156453 0.244614  
LOC100271 0.00042 0.99556 0.996921  
LOC100272 0.111061 0.139977 0.223471  
LOC100272 -0.29243 7.46E-05 0.000368  
LOC100272 -0.22198 0.002902 0.008598  
LOC100272 0.04085 0.588238 0.686486  
LOC100286 0.159915 0.032987 0.067847  
LOC100286 -0.39706 4.08E-08 5.31E-07  
LOC100287 0.07278 0.334323 0.446531  
LOC100287 -0.01844 0.807009 0.86333  
LOC100288 0.151679 0.043269 0.085202  
LOC100288 -0.18186 0.015117 0.035073  
LOC100302 0.003005 0.968244 0.978318  
LOC100302 -0.09301 0.216877 0.318144  
LOC100302 -0.11722 0.11916 0.196372  
LOC100303 -0.41231 1.07E-08 1.68E-07  
LOC11323C 0.143366 0.056244 0.105941  
LOC11511C 0.440652 7.48E-10 1.65E-08  
LOC116437 -0.12655 0.092321 0.159716  
LOC121838 -0.11045 0.142175 0.226358  
LOC121952 -0.08015 0.287573 0.396822  
LOC126536 0.131441 0.080312 0.142647  
LOC127841 0.40525 2.01E-08 2.88E-07  
LOC134466 0.004263 0.954964 0.969128  
LOC143188 0.184149 0.013869 0.032595  
LOC143666 0.130758 0.081909 0.145041  
LOC144438 -0.36555 5.24E-07 4.95E-06  
LOC144486 -0.33175 6.08E-06 4.22E-05  
LOC144571 -0.20375 0.006375 0.016838  
LOC144742 -0.04796 0.524928 0.630271  
LOC144776 -0.10678 0.156015 0.244089  
LOC145474 0.045371 0.547594 0.650065  
LOC145783 -0.01104 0.883668 0.919182  
LOC14582C 0.007419 0.9217 0.94566

LOC145837 -0.47556 1.97E-11 6.55E-10  
LOC145845 0.045051 0.550425 0.65272  
LOC146336 -0.13783 0.066553 0.121955  
LOC146880 0.419025 5.84E-09 9.93E-08  
LOC147727 -0.1659 0.026889 0.05708  
LOC147804 -0.12638 0.092763 0.160331  
LOC148145 0.016273 0.829308 0.879289  
LOC148189 -0.02168 0.773949 0.839097  
LOC148413 0.061138 0.417541 0.529905  
LOC148696 -0.0731 0.332188 0.444431  
LOC148709 0.002153 0.977249 0.984268  
LOC148824 -0.01624 0.829601 0.87942  
LOC149134 -0.06096 0.418869 0.531147  
LOC149620 -0.01022 0.89229 0.924939  
LOC149837 -0.02307 0.759834 0.828551  
LOC150185 0.032416 0.667527 0.754871  
LOC150197 0.354338 1.22E-06 1.03E-05  
LOC150381 -0.08071 0.284174 0.393038  
LOC150527 -0.2417 0.001153 0.003884  
LOC150568 -0.07645 0.310454 0.421022  
LOC150622 -0.10385 0.167738 0.258644  
LOC150776 0.158104 0.03505 0.071362  
LOC150786 -0.03805 0.614127 0.709405  
LOC151009 0.285505 0.000112 0.000526  
LOC151162 -0.15371 0.040519 0.080589  
LOC151174 -0.02842 0.706492 0.786368  
LOC151300 -0.04113 0.585661 0.684206  
LOC151534 0.406261 1.84E-08 2.66E-07  
LOC151658 -0.16583 0.026956 0.05718  
LOC152024 0.1519 0.042962 0.084674  
LOC152217 0.159394 0.033569 0.068838  
LOC152225 0.089299 0.235868 0.339872  
LOC153328 0.192846 0.009908 0.024503  
LOC153684 0.004714 0.950202 0.966378  
LOC153910 0.042013 0.577648 0.676763  
LOC154449 -0.18304 0.014463 0.033809  
LOC154761 -0.11232 0.135519 0.217831  
LOC154822 -0.3048 3.52E-05 0.000193  
LOC157381 0.029293 0.697911 0.77916  
LOC157627 -0.14675 0.050621 0.096976  
LOC158376 -0.11123 0.139366 0.222732  
LOC158572 -0.34313 2.75E-06 2.10E-05  
LOC158696 -0.29373 6.91E-05 0.000345  
LOC162632 -0.02813 0.70939 0.788282  
LOC168474 -0.18084 0.015708 0.036226  
LOC200030 -0.0214 0.776786 0.841507  
LOC200726 -0.25824 0.000501 0.001905  
LOC201651 0.029939 0.691577 0.774056  
LOC202181 -0.01191 0.874595 0.913059  
LOC202781 0.004182 0.955821 0.969811  
LOC219347 -0.30598 3.27E-05 0.000182  
LOC220429 -0.14587 0.052035 0.099269  
LOC220594 -0.14176 0.05909 0.110211  
LOC220729 0.216162 0.003756 0.010724

LOC22093C 0.372086 3.15E-07 3.19E-06  
LOC221122 -0.10401 0.167091 0.257767  
LOC221442 0.025544 0.735019 0.808447  
LOC22171C -0.40929 1.41E-08 2.11E-07  
LOC22269E -0.10884 0.148124 0.233853  
LOC25303E -0.16151 0.031262 0.064831  
LOC253724 -0.44252 6.23E-10 1.41E-08  
LOC25455E -0.13346 0.075746 0.135842  
LOC255167 -0.32129 1.23E-05 7.76E-05  
LOC25688C -0.01081 0.886099 0.92079  
LOC25735E 0.099196 0.187716 0.282781  
LOC25845 -0.00717 0.924343 0.947636  
LOC26102 -0.05983 0.427617 0.539714  
LOC282997 -0.32168 1.20E-05 7.59E-05  
LOC28305C 0.234997 0.001591 0.005131  
LOC28307C -0.17115 0.02236 0.048753  
LOC283174 0.35255 1.39E-06 1.15E-05  
LOC283267 -0.21337 0.004241 0.011891  
LOC283314 0.055114 0.464971 0.575041  
LOC283332 0.017588 0.815747 0.869573  
LOC283392 0.031981 0.671729 0.758474  
LOC283404 0.233535 0.001705 0.005444  
LOC28366E 0.044668 0.553821 0.655567  
LOC283731 0.105955 0.159241 0.247842  
LOC283761 -0.1012 0.1789 0.271932  
LOC28385E -0.3869 9.56E-08 1.12E-06  
LOC283867 0.40556 1.96E-08 2.81E-07  
LOC283922 -0.04107 0.58623 0.684708  
LOC28399E -0.04854 0.519934 0.625604  
LOC28400E -0.18679 0.012542 0.029979  
LOC28402E -0.26364 0.000377 0.001492  
LOC28410C 0.248564 0.000821 0.002906  
LOC284232 -0.09193 0.222295 0.324382  
LOC28423E 0.084073 0.264532 0.3718  
LOC28427E -0.16726 0.025642 0.054792  
LOC28437E 0.127601 0.089629 0.155864  
LOC28444C -0.18239 0.014823 0.034491  
LOC284441 -0.05114 0.497844 0.605286  
LOC284551 0.09148 0.22458 0.326791  
LOC28457E 0.237227 0.001431 0.004678  
LOC284632 -0.11598 0.123165 0.201378  
LOC284661 -0.14223 0.058251 0.108918  
LOC28468E 0.139255 0.063761 0.117559  
LOC28474E -0.15903 0.033984 0.069544  
LOC28478E -0.18651 0.012675 0.030233  
LOC28479E -0.02288 0.761745 0.830041  
LOC284837 0.422987 4.05E-09 7.24E-08  
LOC28490C -0.11802 0.116643 0.19298  
LOC28503E -0.23319 0.001733 0.005519  
LOC28504E -0.00431 0.954483 0.968782  
LOC285074 0.162305 0.030423 0.063421  
LOC285194 -0.10309 0.170885 0.262392  
LOC28520E -0.16921 0.023952 0.051728  
LOC28535E -0.11617 0.122545 0.200562

LOC28537C 0.009195 0.903043 0.932245  
LOC28537E 0.09282 0.217835 0.319238  
LOC285401 -0.15753 0.035728 0.072537  
LOC28541E -0.34958 1.73E-06 1.40E-05  
LOC28545E -0.40446 2.15E-08 3.06E-07  
LOC285501 0.066752 0.375994 0.488946  
LOC28554E 0.290969 8.14E-05 0.000397  
LOC28559E -0.15015 0.045444 0.088795  
LOC285627 -0.20422 0.006252 0.016561  
LOC28562E 0.000396 0.995815 0.997025  
LOC28569E -0.12411 0.098819 0.168905  
LOC28569E -0.14237 0.05799 0.108526  
LOC28573E -0.23834 0.001357 0.004463  
LOC28573E -0.00453 0.952151 0.967515  
LOC28574C -0.03134 0.677894 0.763233  
LOC28576E 0.106217 0.158207 0.246597  
LOC28578C -0.04774 0.526891 0.632129  
LOC28579E -0.18188 0.015106 0.03506  
LOC28583C 0.374596 2.59E-07 2.69E-06  
LOC285847 -0.18778 0.012073 0.029024  
LOC285954 -0.18483 0.013514 0.031926  
LOC28600E -0.13826 0.065694 0.120615  
LOC286094 -0.08752 0.245388 0.350296  
LOC28635E -0.07148 0.343069 0.455353  
LOC286367 -0.16049 0.032355 0.066749  
LOC286467 0.129113 0.085861 0.150622  
LOC29034 -0.01533 0.839046 0.886335  
LOC33858E 0.181221 0.015485 0.035783  
LOC338651 -0.06325 0.401593 0.514254  
LOC33875E -0.4389 8.89E-10 1.91E-08  
LOC33879E -0.09955 0.186145 0.280722  
LOC339047 -0.15363 0.040623 0.080748  
LOC33924C 0.18115 0.015526 0.035858  
LOC33929C -0.27602 0.000192 0.000836  
LOC339524 -0.02816 0.70908 0.788092  
LOC33953E -0.04554 0.546075 0.648767  
LOC339674 -0.02919 0.698903 0.77996  
LOC33978E 0.011637 0.877476 0.915042  
LOC340017 0.032994 0.661959 0.75042  
LOC340074 0.042532 0.572958 0.672664  
LOC34050E -0.1269 0.091411 0.158406  
LOC34105E 0.224032 0.002645 0.007928  
LOC34234E -0.40137 2.82E-08 3.86E-07  
LOC34459E 0.052174 0.489156 0.59781  
LOC344967 -0.12703 0.091088 0.157956  
LOC34737E -0.05349 0.478273 0.587925  
LOC348021 -0.07434 0.324046 0.436075  
LOC34884C -0.09084 0.227832 0.330605  
LOC34892E -0.0135 0.858106 0.901221  
LOC349114 0.094287 0.210617 0.310802  
LOC34919E 0.037106 0.622904 0.716747  
LOC36003C -0.07075 0.348019 0.460409  
LOC37444E 0.215154 0.003925 0.011138  
LOC374491 0.061019 0.418449 0.530718

LOC37519C -0.21606 0.003772 0.010762  
LOC38764C -0.10928 0.146474 0.23184  
LOC387647 -0.09008 0.231758 0.335324  
LOC388152 0.093482 0.214556 0.315367  
LOC388242 0.591344 3.61E-18 6.66E-16  
LOC388387 -0.01866 0.804745 0.861887  
LOC38842E -0.2537 0.000633 0.002319  
LOC38858E 0.260193 0.000452 0.001744  
LOC388692 0.194629 0.009232 0.023053  
LOC38878C 0.01008 0.893764 0.925933  
LOC38879C 0.185237 0.013308 0.031496  
LOC38895E 0.198477 0.007911 0.020243  
LOC38903E -0.1007 0.181063 0.274601  
LOC389332 -0.1487 0.04759 0.092201  
LOC38933E 0.052039 0.490282 0.598817  
LOC38945E 0.087262 0.246772 0.351815  
LOC38949E -0.12649 0.092468 0.159928  
LOC389634 -0.10338 0.169689 0.260961  
LOC38970E -0.14218 0.058331 0.109021  
LOC389791 0.190201 0.010991 0.02678  
LOC39059E -0.07442 0.323543 0.435546  
LOC39085E 0.071492 0.342967 0.455249  
LOC391322 -0.04754 0.528635 0.633453  
LOC39219C -0.0422 0.575937 0.675207  
LOC399744 -0.14207 0.05853 0.10934  
LOC39981E 0.129948 0.083836 0.147725  
LOC39995E -0.00769 0.9189 0.943864  
LOC400027 -0.30232 4.11E-05 0.000221  
LOC40004E 0.443597 5.59E-10 1.29E-08  
LOC400657 -0.38005 1.67E-07 1.84E-06  
LOC40069C 0.086011 0.253633 0.359781  
LOC400752 -0.15218 0.042576 0.084047  
LOC40075C 0.018902 0.802259 0.860717  
LOC400794 -0.04885 0.51732 0.623234  
LOC400804 -0.05138 0.495831 0.60358  
LOC400891 -0.1257 0.094559 0.16286  
LOC400927 -0.01224 0.871182 0.911085  
LOC400931 0.336119 4.50E-06 3.25E-05  
LOC40094C -0.20264 0.006673 0.017525  
LOC40101C -0.01031 0.891356 0.924369  
LOC401052 0.192032 0.010231 0.025172  
LOC40109E -0.12422 0.098516 0.168488  
LOC401127 -0.19649 0.008569 0.021657  
LOC401387 -0.18087 0.015691 0.0362  
LOC401397 -0.01872 0.804136 0.861571  
LOC401431 -0.4147 8.66E-09 1.40E-07  
LOC40146E -0.22788 0.002219 0.006826  
LOC40158E -0.33526 4.77E-06 3.42E-05  
LOC402377 -0.20652 0.005679 0.015258  
LOC402644 -0.09441 0.209995 0.309999  
LOC40783E -0.04647 0.537956 0.641241  
LOC41505C 0.093319 0.21536 0.316314  
LOC44004C -0.05666 0.452488 0.563409  
LOC44017E -0.05134 0.496109 0.603696

LOC440354 0.140285 0.061805 0.114481  
LOC440356 0.098268 0.1919 0.287777  
LOC440461 -0.0299 0.691997 0.774351  
LOC440563 0.05946 0.430463 0.542372  
LOC440896 -0.12914 0.085786 0.150518  
LOC440905 -0.321 1.25E-05 7.88E-05  
LOC440925 -0.03494 0.643359 0.73379  
LOC440944 0.145467 0.052694 0.100296  
LOC440957 0.025073 0.739725 0.812358  
LOC441046 -0.03776 0.616802 0.711382  
LOC441089 -0.28763 9.90E-05 0.000471  
LOC441177 -0.28261 0.000132 0.000607  
LOC441204 -0.31278 2.13E-05 0.000125  
LOC441208 -0.18986 0.011139 0.027093  
LOC441294 0.373737 2.77E-07 2.84E-06  
LOC441454 -0.035 0.64282 0.733568  
LOC441455 -0.02133 0.777487 0.842044  
LOC441601 -0.13589 0.070505 0.128023  
LOC441666 -0.18736 0.012271 0.029405  
LOC441869 -0.04862 0.519254 0.624899  
LOC442308 -0.1866 0.012631 0.030148  
LOC442421 -0.33752 4.08E-06 2.97E-05  
LOC442454 -0.09691 0.198128 0.295544  
LOC442459 -0.00245 0.974056 0.982302  
LOC493754 0.260715 0.00044 0.001705  
LOC494141 -0.14476 0.053871 0.102202  
LOC541471 0.437524 1.02E-09 2.15E-08  
LOC541473 0.094165 0.211208 0.311452  
LOC550112 -0.09551 0.204736 0.30371  
LOC550643 0.214055 0.004117 0.01161  
LOC554202 0.358435 8.99E-07 7.91E-06  
LOC55908 -0.08592 0.254115 0.36031  
LOC572558 -0.24628 0.00092 0.003197  
LOC595101 -0.03626 0.630899 0.723212  
LOC606724 0.034332 0.649139 0.738384  
LOC613037 0.052062 0.490089 0.598617  
LOC619207 0.174286 0.01998 0.044391  
LOC641298 -0.03151 0.676277 0.762194  
LOC641367 -0.17831 0.017253 0.039195  
LOC642587 0.284921 0.000116 0.000541  
LOC642597 -0.23232 0.001805 0.005711  
LOC642826 0.203129 0.00654 0.017227  
LOC642846 0.137242 0.067732 0.123703  
LOC642852 -0.1643 0.028413 0.059782  
LOC642929 -0.07987 0.289245 0.39863  
LOC643008 0.349501 1.74E-06 1.40E-05  
LOC643387 0.124367 0.098127 0.167953  
LOC643486 0.022983 0.760737 0.829295  
LOC643677 -0.21824 0.003428 0.009893  
LOC643719 0.170468 0.022907 0.049783  
LOC643763 0.101392 0.178084 0.270901  
LOC643837 -0.36905 4.00E-07 3.92E-06  
LOC643923 0.053231 0.480381 0.589857  
LOC644145 0.129061 0.085988 0.150765



LOC64416E -0.08216 0.275571 0.383499  
LOC64417E -0.23792 0.001384 0.004546  
LOC64453E 0.12911 0.085868 0.150622  
LOC64466E -0.20498 0.006055 0.016098  
LOC64493E 0.387181 9.35E-08 1.10E-06  
LOC64516E 0.031267 0.678641 0.763725  
LOC64532E -0.04185 0.579136 0.678065  
LOC64533E 0.260402 0.000447 0.001728  
LOC645431 0.131199 0.080875 0.143492  
LOC64567E 0.167528 0.025406 0.054335  
LOC64575E 0.038379 0.611015 0.706644  
LOC646214 -0.28825 9.55E-05 0.000456  
LOC646471 -0.13593 0.07042 0.127916  
LOC64649E 0.01135 0.880472 0.917112  
LOC646627 -0.17757 0.017729 0.040102  
LOC64676E -0.39193 6.30E-08 7.77E-07  
LOC64681E 0.073044 0.332566 0.444755  
LOC646851 -0.08152 0.279385 0.387743  
LOC64698E -0.11674 0.120707 0.198259  
LOC64699E 0.013892 0.853975 0.897851  
LOC647121 0.180314 0.016017 0.036833  
LOC64728E 0.071093 0.345676 0.457987  
LOC64730E -0.2255 0.002475 0.00749  
LOC64785E 0.079937 0.288835 0.398175  
LOC64794E 0.15101 0.044212 0.08673  
LOC64797E -0.18662 0.012621 0.03013  
LOC648691 0.125786 0.094324 0.162498  
LOC64874E -0.15321 0.041173 0.081677  
LOC64933E 0.022681 0.763788 0.831742  
LOC65036E 0.03697 0.624184 0.717886  
LOC65062E -0.19974 0.007517 0.019371  
LOC65125E -0.3401 3.41E-06 2.54E-05  
LOC65227E 0.08472 0.260861 0.367529  
LOC65311E 0.062552 0.406831 0.519213  
LOC653501 -0.44067 7.47E-10 1.65E-08  
LOC653544 0.010206 0.892448 0.925054  
LOC65356E -0.06878 0.361626 0.474856  
LOC65365E -0.33717 4.18E-06 3.04E-05  
LOC65378E 0.129847 0.08408 0.148095  
LOC65434E 0.064321 0.393665 0.506331  
LOC65443E 0.264742 0.000355 0.001422  
LOC67865E 0.091241 0.225798 0.32828  
LOC72380E 0.044922 0.551564 0.653825  
LOC72397E 0.019265 0.798534 0.858164  
LOC727677 0.003233 0.965838 0.976806  
LOC72789E -0.01073 0.886937 0.921274  
LOC728024 -0.43438 1.38E-09 2.79E-08  
LOC72819E -0.09491 0.207597 0.306992  
LOC728264 0.195463 0.00893 0.022387  
LOC72827E 0.060371 0.423421 0.53568  
LOC72832E -0.29933 4.93E-05 0.000259  
LOC72839E -0.22209 0.002887 0.008559  
LOC728554 0.314611 1.89E-05 0.000113  
LOC72860E 0.036945 0.624415 0.71811

LOC72861E -0.23325 0.001728 0.005504  
LOC72864C -0.24584 0.00094 0.003256  
LOC72864E 0.393264 5.63E-08 7.05E-07  
LOC72872E -0.33027 6.72E-06 4.60E-05  
LOC72874E -0.0826 0.273001 0.381076  
LOC72875E 0.145674 0.052354 0.099755  
LOC72881E 0.036171 0.631702 0.723857  
LOC72885E 0.093174 0.216075 0.317176  
LOC72887E 0.153314 0.041038 0.081442  
LOC72898E -0.03804 0.614203 0.709405  
LOC72902C 0.064557 0.391933 0.504628  
LOC72908E 0.147314 0.04973 0.095545  
LOC72915E 0.052277 0.488298 0.596909  
LOC72917E -0.07755 0.303529 0.413902  
LOC729234 0.16899 0.024136 0.052046  
LOC72937E 0.271802 0.000242 0.001019  
LOC729467 -0.11925 0.112866 0.188211  
LOC72960E -0.0198 0.793073 0.853367  
LOC72960E 0.090282 0.23073 0.334172  
LOC72966E 0.047505 0.528898 0.63354  
LOC72967E -0.27132 0.000249 0.001044  
LOC72979E -0.0757 0.315208 0.426387  
LOC729991 0.042024 0.577549 0.676687  
LOC729991 -0.06532 0.386337 0.499048  
LOC730101 -0.40233 2.59E-08 3.60E-07  
LOC73066E 0.1485 0.047899 0.092676  
LOC730811 -0.28466 0.000118 0.000548  
LOC73177E 0.390532 7.08E-08 8.61E-07  
LOC73178E 0.057406 0.446581 0.557817  
LOC73227E 0.104659 0.164435 0.254444  
LOC80054 0.142906 0.057046 0.107065  
LOC80154 0.308088 2.87E-05 0.000162  
LOC81691 -0.17794 0.017491 0.039628  
LOC84740 0.422359 4.30E-09 7.59E-08  
LOC84856 -0.13413 0.074254 0.13364  
LOC84931 0.000975 0.989694 0.992542  
LOC84989 0.215581 0.003852 0.010958  
LOC90110 0.041365 0.583541 0.682169  
LOC90246 -0.01077 0.886564 0.92108  
LOC90586 0.104131 0.166587 0.25709  
LOC90784 -0.22033 0.003123 0.009142  
LOC90834 0.050886 0.499958 0.607162  
LOC91149 -0.32704 8.37E-06 5.55E-05  
LOC91316 0.074916 0.320294 0.432085  
LOC91450 0.203822 0.006355 0.0168  
LOC91948 0.136556 0.069129 0.125928  
LOC92249 -0.24184 0.001145 0.003863  
LOC92659 -0.04827 0.522291 0.627866  
LOC92973 -0.07309 0.332258 0.444464  
LOC93432 -0.11324 0.132311 0.213577  
LOC93622 0.011033 0.883787 0.919258  
LOC96610 0.066989 0.374299 0.48735  
LOH12CR1 0.027986 0.710774 0.789465  
LOH12CR2 -0.32354 1.06E-05 6.82E-05

|          |          |          |          |
|----------|----------|----------|----------|
| LOH3CR2A | -0.05001 | 0.507362 | 0.614139 |
| LONP1    | -0.05444 | 0.470466 | 0.580603 |
| LONP2    | 0.092508 | 0.219389 | 0.320985 |
| LONRF1   | -0.12002 | 0.110535 | 0.185262 |
| LONRF2   | -0.24283 | 0.001091 | 0.003701 |
| LONRF3   | 0.263272 | 0.000384 | 0.001517 |
| LOR      | 0.018865 | 0.802639 | 0.860938 |
| LOXHD1   | -0.21111 | 0.004674 | 0.012929 |
| LOXL1    | 0.32564  | 9.19E-06 | 6.03E-05 |
| LOXL2    | 0.282579 | 0.000133 | 0.000608 |
| LOXL3    | 0.193597 | 0.009619 | 0.023895 |
| LOXL4    | 0.247711 | 0.000857 | 0.003011 |
| LOX      | 0.10376  | 0.16811  | 0.259157 |
| LPAL2    | -0.10591 | 0.159411 | 0.248039 |
| LPAR1    | -0.09994 | 0.184428 | 0.278622 |
| LPAR2    | 0.505689 | 6.03E-13 | 2.94E-11 |
| LPAR3    | -0.0205  | 0.785976 | 0.848403 |
| LPAR4    | -0.04757 | 0.528339 | 0.633327 |
| LPAR5    | 0.503656 | 7.72E-13 | 3.63E-11 |
| LPAR6    | 0.361342 | 7.22E-07 | 6.57E-06 |
| LPA      | -0.23491 | 0.001598 | 0.005147 |
| LPCAT1   | -0.36762 | 4.46E-07 | 4.31E-06 |
| LPCAT2   | 0.443429 | 5.69E-10 | 1.31E-08 |
| LPCAT3   | -0.09304 | 0.216727 | 0.317991 |
| LPCAT4   | 0.630548 | 4.03E-21 | 1.77E-18 |
| LPGAT1   | 0.060449 | 0.422816 | 0.53504  |
| LPHN1    | -0.37685 | 2.16E-07 | 2.30E-06 |
| LPHN2    | -0.17323 | 0.020754 | 0.045792 |
| LPHN3    | -0.16169 | 0.031071 | 0.064504 |
| LPIN1    | 0.035312 | 0.639823 | 0.730984 |
| LPIN2    | -0.03038 | 0.687244 | 0.770602 |
| LPIN3    | 0.272279 | 0.000236 | 0.000999 |
| LPL      | -0.19651 | 0.008563 | 0.021648 |
| LPO      | 0.038688 | 0.608146 | 0.703903 |
| LPPR1    | -0.35294 | 1.35E-06 | 1.12E-05 |
| LPPR2    | -0.25363 | 0.000635 | 0.002325 |
| LPPR3    | -0.10931 | 0.146389 | 0.231762 |
| LPPR4    | -0.18082 | 0.015718 | 0.036241 |
| LPPR5    | 0.101751 | 0.176544 | 0.269054 |
| LPP      | 0.086744 | 0.249598 | 0.355058 |
| LPXN     | 0.103648 | 0.168573 | 0.259648 |
| LQK1     | -0.10776 | 0.152226 | 0.239182 |
| LRAT     | 0.052879 | 0.483291 | 0.592399 |
| LRBA     | -0.27807 | 0.000171 | 0.000758 |
| LRCH1    | 0.220672 | 0.003077 | 0.009023 |
| LRCH2    | -0.29742 | 5.54E-05 | 0.000286 |
| LRCH3    | -0.14202 | 0.058621 | 0.109491 |
| LRCH4    | 0.110046 | 0.143661 | 0.228136 |
| LRDD     | 0.135057 | 0.072268 | 0.130671 |
| LRFN1    | -0.25434 | 0.000613 | 0.002258 |
| LRFN2    | -0.1149  | 0.1267   | 0.206152 |
| LRFN3    | 0.106845 | 0.155749 | 0.243808 |
| LRFN4    | 0.461627 | 8.84E-11 | 2.51E-09 |
| LRFN5    | -0.13145 | 0.080283 | 0.142633 |

|          |          |          |          |
|----------|----------|----------|----------|
| LRG1     | 0.327459 | 8.13E-06 | 5.41E-05 |
| LRGUK    | -0.10908 | 0.147213 | 0.232733 |
| LRIG1    | -0.30458 | 3.57E-05 | 0.000196 |
| LRIG2    | 0.001723 | 0.981788 | 0.987381 |
| LRIG3    | 0.060496 | 0.422453 | 0.534694 |
| LRIT1    | -0.02872 | 0.7035   | 0.783718 |
| LRIT2    | -0.11635 | 0.121941 | 0.199773 |
| LRIT3    | -0.03897 | 0.605557 | 0.701605 |
| LRMP     | 0.129761 | 0.084287 | 0.148336 |
| LRP10    | 0.32217  | 1.16E-05 | 7.39E-05 |
| LRP11    | -0.31187 | 2.26E-05 | 0.000131 |
| LRP12    | -0.27998 | 0.000154 | 0.000691 |
| LRP1B    | -0.29476 | 6.50E-05 | 0.000327 |
| LRP1     | 0.137363 | 0.067487 | 0.123358 |
| LRP2BP   | -0.39275 | 5.88E-08 | 7.33E-07 |
| LRP2     | -0.04285 | 0.570095 | 0.670019 |
| LRP3     | -0.14101 | 0.060455 | 0.112258 |
| LRP4     | -0.16907 | 0.024064 | 0.051913 |
| LRP5L    | 0.015202 | 0.840385 | 0.887181 |
| LRP5     | 0.033596 | 0.656181 | 0.745149 |
| LRP6     | -0.35747 | 9.66E-07 | 8.42E-06 |
| LRP8     | 0.172643 | 0.021198 | 0.046615 |
| LRPAP1   | -0.25541 | 0.00058  | 0.002156 |
| LRPPRC   | -0.05773 | 0.444003 | 0.555735 |
| LRRC10B  | -0.33896 | 3.69E-06 | 2.72E-05 |
| LRRC10   | 0.052347 | 0.487715 | 0.596381 |
| LRRC14B  | -0.15808 | 0.03508  | 0.07141  |
| LRRC14   | -0.02464 | 0.744078 | 0.815644 |
| LRRC15   | 0.227649 | 0.002243 | 0.006892 |
| LRRC16A  | 0.165285 | 0.027466 | 0.058106 |
| LRRC16B  | -0.1737  | 0.02041  | 0.045184 |
| LRRC17   | 0.049279 | 0.513607 | 0.619656 |
| LRRC18   | -0.08012 | 0.287702 | 0.396952 |
| LRRC19   | 0.091224 | 0.225882 | 0.32837  |
| LRRC1    | 0.458927 | 1.17E-10 | 3.24E-09 |
| LRRC20   | 0.065879 | 0.382287 | 0.495088 |
| LRRC23   | -0.17476 | 0.019638 | 0.043726 |
| LRRC24   | -0.17242 | 0.021369 | 0.046917 |
| LRRC25   | 0.012771 | 0.865648 | 0.906926 |
| LRRC26   | -0.0804  | 0.28604  | 0.395066 |
| LRRC27   | -0.19216 | 0.01018  | 0.025074 |
| LRRC28   | -0.06514 | 0.387625 | 0.500385 |
| LRRC29   | 0.048405 | 0.521113 | 0.62668  |
| LRRC2    | -0.36575 | 5.16E-07 | 4.89E-06 |
| LRRC31   | 0.276569 | 0.000186 | 0.000814 |
| LRRC32   | 0.129777 | 0.084249 | 0.148281 |
| LRRC33   | -0.15849 | 0.034602 | 0.07059  |
| LRRC34   | -0.16224 | 0.030493 | 0.063526 |
| LRRC36   | -0.07942 | 0.291949 | 0.401544 |
| LRRC37A2 | -0.00048 | 0.994887 | 0.9965   |
| LRRC37A3 | -0.36062 | 7.63E-07 | 6.89E-06 |
| LRRC37A4 | -0.21106 | 0.004685 | 0.012951 |
| LRRC37A  | -0.04267 | 0.57172  | 0.671569 |
| LRRC37B2 | -0.26637 | 0.000326 | 0.001316 |

|         |          |          |          |
|---------|----------|----------|----------|
| LRRC37B | -0.22694 | 0.002317 | 0.007082 |
| LRRC39  | 0.032929 | 0.662579 | 0.750951 |
| LRRC3B  | -0.01863 | 0.805015 | 0.86199  |
| LRRC3   | 0.077174 | 0.305883 | 0.416136 |
| LRRC40  | -0.10257 | 0.173072 | 0.265092 |
| LRRC41  | -0.22564 | 0.002459 | 0.007453 |
| LRRC42  | 0.307929 | 2.90E-05 | 0.000164 |
| LRRC43  | -0.11223 | 0.135839 | 0.21815  |
| LRRC45  | 0.190388 | 0.010912 | 0.026618 |
| LRRC46  | -0.02908 | 0.700023 | 0.780855 |
| LRRC47  | -0.20608 | 0.005785 | 0.015496 |
| LRRC48  | -0.35513 | 1.15E-06 | 9.78E-06 |
| LRRC49  | -0.23429 | 0.001645 | 0.005281 |
| LRRC4B  | -0.22703 | 0.002307 | 0.007055 |
| LRRC4C  | -0.08511 | 0.258681 | 0.365072 |
| LRRC4   | -0.30511 | 3.45E-05 | 0.00019  |
| LRRC50  | -0.26826 | 0.000294 | 0.001208 |
| LRRC52  | -0.09995 | 0.184373 | 0.278599 |
| LRRC55  | 0.026466 | 0.725836 | 0.801401 |
| LRRC56  | -0.07051 | 0.349646 | 0.462216 |
| LRRC57  | 0.304544 | 3.58E-05 | 0.000196 |
| LRRC58  | -0.15245 | 0.042211 | 0.08346  |
| LRRC59  | 0.167308 | 0.025602 | 0.054724 |
| LRRC61  | -0.01788 | 0.812794 | 0.86736  |
| LRRC66  | 0.207909 | 0.005356 | 0.014518 |
| LRRC67  | -0.41154 | 1.15E-08 | 1.78E-07 |
| LRRC69  | 0.059094 | 0.43331  | 0.544952 |
| LRRC6   | 0.100361 | 0.182557 | 0.276428 |
| LRRC70  | -0.17707 | 0.018056 | 0.040712 |
| LRRC7   | -0.25787 | 0.000511 | 0.001935 |
| LRRC8A  | 0.561928 | 3.33E-16 | 3.52E-14 |
| LRRC8B  | 0.047049 | 0.532868 | 0.636903 |
| LRRC8C  | -0.03826 | 0.612171 | 0.707692 |
| LRRC8D  | -0.20033 | 0.007337 | 0.01896  |
| LRRC8E  | 0.547839 | 2.49E-15 | 2.04E-13 |
| LRRC1   | 0.02992  | 0.691763 | 0.77422  |
| LRRFIP1 | 0.264476 | 0.000361 | 0.001439 |
| LRRFIP2 | 0.224046 | 0.002644 | 0.007924 |
| LRRIQ1  | -0.16765 | 0.025299 | 0.054165 |
| LRRIQ3  | -0.13538 | 0.071575 | 0.129656 |
| LRRIQ4  | 0.134833 | 0.072745 | 0.13133  |
| LRRK1   | 0.122804 | 0.102458 | 0.17413  |
| LRRK2   | -0.08996 | 0.232384 | 0.336051 |
| LRRN1   | 0.392232 | 6.14E-08 | 7.60E-07 |
| LRRN2   | -0.27137 | 0.000248 | 0.001042 |
| LRRN3   | -0.22428 | 0.002616 | 0.007858 |
| LRRN4CL | 0.227041 | 0.002306 | 0.007053 |
| LRRN4   | 0.138677 | 0.064881 | 0.1193   |
| LRRTM1  | -0.05606 | 0.457344 | 0.568346 |
| LRRTM2  | -0.33958 | 3.53E-06 | 2.62E-05 |
| LRRTM3  | -0.00628 | 0.933696 | 0.954402 |
| LRRTM4  | -0.21224 | 0.004452 | 0.012381 |
| LRSAM1  | -0.0382  | 0.612651 | 0.708164 |
| LRTM1   | -0.21356 | 0.004207 | 0.011815 |

|           |          |          |          |
|-----------|----------|----------|----------|
| LRTM2     | -0.08419 | 0.26387  | 0.371134 |
| LRTOMT    | -0.10292 | 0.171611 | 0.263302 |
| LRWD1     | -0.08053 | 0.285279 | 0.394195 |
| LSAMP     | -0.06225 | 0.409085 | 0.521215 |
| LSG1      | 0.01792  | 0.812335 | 0.867188 |
| LSM10     | -0.11279 | 0.133875 | 0.215555 |
| LSM11     | -0.06998 | 0.353269 | 0.466132 |
| LSM12     | 0.340078 | 3.41E-06 | 2.55E-05 |
| LSM14A    | -0.11807 | 0.116488 | 0.192828 |
| LSM14B    | -0.22973 | 0.002037 | 0.006332 |
| LSM1      | 0.244742 | 0.000993 | 0.003417 |
| LSM2      | 0.121232 | 0.106964 | 0.180432 |
| LSM3      | 0.074349 | 0.323978 | 0.436014 |
| LSM4      | 0.311633 | 2.29E-05 | 0.000133 |
| LSM5      | 0.089555 | 0.234525 | 0.338562 |
| LSM6      | -0.05866 | 0.436668 | 0.548233 |
| LSM7      | 0.209512 | 0.005004 | 0.013706 |
| LSMD1     | -0.11192 | 0.136906 | 0.219597 |
| LSP1      | 0.201256 | 0.007064 | 0.018373 |
| LSR       | 0.515175 | 1.87E-13 | 1.05E-11 |
| LSS       | -0.09691 | 0.198156 | 0.295544 |
| LST-3TM12 | 0.240486 | 0.001223 | 0.004084 |
| LST1      | 0.165947 | 0.026844 | 0.057009 |
| LTA4H     | -0.13458 | 0.073279 | 0.132114 |
| LTA       | -0.01764 | 0.815258 | 0.869333 |
| LTB4R2    | -0.12683 | 0.091599 | 0.158689 |
| LTB4R     | 0.00553  | 0.941602 | 0.960795 |
| LTBP1     | 0.161531 | 0.031234 | 0.064782 |
| LTBP2     | 0.11454  | 0.127908 | 0.207724 |
| LTBP3     | 0.019373 | 0.797434 | 0.857214 |
| LTBP4     | 0.205619 | 0.005897 | 0.015749 |
| LTBR      | 0.130214 | 0.083199 | 0.146815 |
| LTB       | 0.150355 | 0.04515  | 0.088326 |
| LTC4S     | 0.12226  | 0.104    | 0.176327 |
| LTF       | 0.119059 | 0.113446 | 0.188955 |
| LTK       | 0.30748  | 2.98E-05 | 0.000168 |
| LTV1      | -0.29465 | 6.54E-05 | 0.000329 |
| LUC7L2    | -0.12579 | 0.094317 | 0.162498 |
| LUC7L3    | 0.080282 | 0.286755 | 0.395859 |
| LUC7L     | 0.108354 | 0.149958 | 0.236265 |
| LUM       | 0.15447  | 0.03952  | 0.078928 |
| LUZP1     | -0.03493 | 0.643467 | 0.73379  |
| LUZP2     | 0.330084 | 6.81E-06 | 4.64E-05 |
| LUZP4     | -0.00092 | 0.990282 | 0.992893 |
| LUZP6     | -0.01816 | 0.809855 | 0.865485 |
| LXN       | -0.02744 | 0.716125 | 0.793554 |
| LY6D      | 0.463404 | 7.33E-11 | 2.14E-09 |
| LY6E      | 0.569771 | 1.04E-16 | 1.26E-14 |
| LY6G5B    | 0.019805 | 0.793021 | 0.853367 |
| LY6G5C    | -0.1982  | 0.007999 | 0.020438 |
| LY6G6C    | 0.412066 | 1.10E-08 | 1.71E-07 |
| LY6G6D    | -0.06698 | 0.374369 | 0.487409 |
| LY6G6E    | 0.040868 | 0.588072 | 0.686358 |
| LY6G6F    | 0.065105 | 0.387914 | 0.500596 |

|          |          |          |          |
|----------|----------|----------|----------|
| LY6H     | -0.16514 | 0.027608 | 0.058349 |
| LY6K     | -0.01815 | 0.80994  | 0.865529 |
| LY75     | 0.453118 | 2.14E-10 | 5.49E-09 |
| LY86     | 0.108264 | 0.150299 | 0.236643 |
| LY96     | 0.10524  | 0.162092 | 0.251508 |
| LY9      | -0.06889 | 0.36086  | 0.474003 |
| LYAR     | 0.04986  | 0.508649 | 0.615244 |
| LYG1     | 0.18408  | 0.013906 | 0.032669 |
| LYG2     | -0.04011 | 0.594978 | 0.692268 |
| LYL1     | 0.106408 | 0.157458 | 0.245744 |
| LYNX1    | 0.172145 | 0.021579 | 0.047281 |
| LYN      | 0.088549 | 0.239844 | 0.34417  |
| LYPD1    | 0.229514 | 0.002058 | 0.006386 |
| LYPD2    | 0.387258 | 9.29E-08 | 1.09E-06 |
| LYPD3    | 0.261462 | 0.000423 | 0.001647 |
| LYPD4    | -0.02113 | 0.779553 | 0.843219 |
| LYPD5    | 0.330243 | 6.73E-06 | 4.60E-05 |
| LYPD6B   | 0.401318 | 2.83E-08 | 3.86E-07 |
| LYPD6    | 0.258121 | 0.000504 | 0.001915 |
| LYPLA1   | 0.053632 | 0.47708  | 0.586642 |
| LYPLA2P1 | 0.341832 | 3.01E-06 | 2.28E-05 |
| LYPLA2   | 0.424328 | 3.58E-09 | 6.50E-08 |
| LYPLAL1  | 0.054934 | 0.466431 | 0.576522 |
| LYRM1    | -0.18225 | 0.014902 | 0.034651 |
| LYRM2    | -0.44144 | 6.92E-10 | 1.54E-08 |
| LYRM4    | -0.09253 | 0.2193   | 0.320907 |
| LYRM5    | -0.3398  | 3.48E-06 | 2.59E-05 |
| LYRM7    | -0.4128  | 1.03E-08 | 1.61E-07 |
| LYSMD1   | 0.013166 | 0.861534 | 0.903862 |
| LYSMD2   | -0.25112 | 0.000722 | 0.002601 |
| LYSMD3   | -0.25308 | 0.000653 | 0.002381 |
| LYSMD4   | 0.244106 | 0.001025 | 0.003505 |
| LYST     | -0.2069  | 0.00559  | 0.015044 |
| LYVE1    | -0.24306 | 0.001079 | 0.003665 |
| LYZL2    | 0.05893  | 0.434587 | 0.546106 |
| LYZL4    | 0.034368 | 0.648803 | 0.738172 |
| LYZL6    | 0.000121 | 0.998725 | 0.998877 |
| LYZ      | 0.191607 | 0.010403 | 0.025538 |
| LZIC     | -0.20825 | 0.005279 | 0.01434  |
| LZTFL1   | -0.42566 | 3.16E-09 | 5.79E-08 |
| LZTR1    | 0.001493 | 0.984223 | 0.989099 |
| LZTS1    | 0.05521  | 0.464196 | 0.574334 |
| LZTS2    | 0.224731 | 0.002563 | 0.007719 |
| M6PR     | -0.03612 | 0.632138 | 0.724212 |
| MAB21L1  | 0.007361 | 0.922314 | 0.946093 |
| MAB21L2  | 0.208623 | 0.005197 | 0.014148 |
| MACC1    | 0.420057 | 5.31E-09 | 9.11E-08 |
| MACF1    | -0.1409  | 0.060666 | 0.112629 |
| MACROD1  | 0.254729 | 0.000601 | 0.002219 |
| MACROD2  | 0.058695 | 0.436426 | 0.547964 |
| MAD1L1   | 0.186046 | 0.012903 | 0.03068  |
| MAD2L1BP | 0.026899 | 0.721531 | 0.797759 |
| MAD2L1   | 0.118601 | 0.114851 | 0.190734 |
| MAD2L2   | -0.05077 | 0.500965 | 0.608183 |

|         |          |          |          |
|---------|----------|----------|----------|
| MADCAM1 | -0.03554 | 0.637621 | 0.729184 |
| MADD    | -0.2577  | 0.000515 | 0.00195  |
| MAEA    | 0.031629 | 0.675134 | 0.761297 |
| MAEL    | 0.19569  | 0.00885  | 0.022223 |
| MAF1    | 0.066895 | 0.374974 | 0.488037 |
| MAFA    | 0.078214 | 0.299392 | 0.409503 |
| MAFB    | -0.16901 | 0.02412  | 0.052018 |
| MAFF    | 0.414427 | 8.88E-09 | 1.43E-07 |
| MAFG    | -0.17671 | 0.018292 | 0.041146 |
| MAFK    | 0.215608 | 0.003848 | 0.010948 |
| MAF     | 0.066772 | 0.37585  | 0.488823 |
| MAGEA10 | 0.099844 | 0.184835 | 0.279109 |
| MAGEA11 | -0.10666 | 0.156476 | 0.244617 |
| MAGEA12 | 0.009423 | 0.900655 | 0.930683 |
| MAGEA1  | -0.20123 | 0.007072 | 0.01839  |
| MAGEA2  | -0.01617 | 0.830418 | 0.879758 |
| MAGEA3  | 0.01271  | 0.866281 | 0.907445 |
| MAGEA4  | -0.01169 | 0.876972 | 0.914816 |
| MAGEA5  | 0.157784 | 0.035425 | 0.072039 |
| MAGEA6  | -0.05251 | 0.486329 | 0.595128 |
| MAGEA8  | 0.036261 | 0.630845 | 0.723191 |
| MAGEA9B | -0.02851 | 0.705582 | 0.785463 |
| MAGEB16 | 0.123079 | 0.101684 | 0.173023 |
| MAGEB18 | 0.006812 | 0.928088 | 0.950205 |
| MAGEB1  | 0.008714 | 0.908097 | 0.935767 |
| MAGEB2  | -0.1415  | 0.059552 | 0.110904 |
| MAGEB3  | 0.042731 | 0.571163 | 0.671075 |
| MAGEB4  | -0.1045  | 0.165099 | 0.255271 |
| MAGEB6  | 0.05208  | 0.489941 | 0.59851  |
| MAGEC1  | -0.0848  | 0.260414 | 0.367029 |
| MAGEC2  | 0.036609 | 0.627573 | 0.720694 |
| MAGEC3  | -0.25977 | 0.000462 | 0.001775 |
| MAGED1  | -0.35562 | 1.11E-06 | 9.50E-06 |
| MAGED2  | -0.30389 | 3.73E-05 | 0.000203 |
| MAGED4B | -0.29885 | 5.08E-05 | 0.000266 |
| MAGED4  | -0.20545 | 0.005939 | 0.015842 |
| MAGEE1  | -0.34149 | 3.09E-06 | 2.33E-05 |
| MAGEE2  | -0.2276  | 0.002248 | 0.006902 |
| MAGEF1  | -0.08231 | 0.274733 | 0.382629 |
| MAGEH1  | -0.37682 | 2.17E-07 | 2.30E-06 |
| MAGEL2  | -0.05464 | 0.468843 | 0.578829 |
| MAGI1   | -0.12698 | 0.09122  | 0.158144 |
| MAGI2   | -0.26803 | 0.000298 | 0.001221 |
| MAGI3   | 0.061977 | 0.411164 | 0.523222 |
| MAGIX   | 0.081577 | 0.279024 | 0.387377 |
| MAGOHB  | 0.062625 | 0.406283 | 0.518647 |
| MAGOH   | 0.155739 | 0.037907 | 0.076184 |
| MAGT1   | -0.07049 | 0.349765 | 0.462255 |
| MAG     | -0.06192 | 0.411578 | 0.523649 |
| MAK16   | -0.03557 | 0.637422 | 0.728999 |
| MAK     | -0.23265 | 0.001778 | 0.005641 |
| MAL2    | 0.48266  | 8.94E-12 | 3.26E-10 |
| MALAT1  | 0.095256 | 0.205945 | 0.305137 |
| MALL    | 0.653453 | 4.76E-23 | 3.49E-20 |



|           |          |          |          |
|-----------|----------|----------|----------|
| MALT1     | -0.12143 | 0.106384 | 0.179659 |
| MAL       | -0.00633 | 0.933156 | 0.954047 |
| MAMDC2    | -0.07471 | 0.321626 | 0.433403 |
| MAMDC4    | 0.111181 | 0.13955  | 0.222969 |
| MAML1     | -0.23501 | 0.001591 | 0.00513  |
| MAML2     | 0.030408 | 0.687003 | 0.770463 |
| MAML3     | -0.33374 | 5.30E-06 | 3.75E-05 |
| MAMLD1    | -0.29872 | 5.12E-05 | 0.000268 |
| MAMSTR    | 0.16842  | 0.024624 | 0.052972 |
| MAN1A1    | -0.44596 | 4.42E-10 | 1.04E-08 |
| MAN1A2    | -0.24646 | 0.000912 | 0.003175 |
| MAN1B1    | 0.0063   | 0.933482 | 0.954311 |
| MAN1C1    | -0.23331 | 0.001723 | 0.00549  |
| MAN2A1    | -0.16134 | 0.031435 | 0.065111 |
| MAN2A2    | -0.4851  | 6.78E-12 | 2.55E-10 |
| MAN2B1    | 0.116612 | 0.12111  | 0.198675 |
| MAN2B2    | -0.04818 | 0.523059 | 0.628637 |
| MAN2C1    | 0.129241 | 0.085548 | 0.150193 |
| MANBAL    | 0.149999 | 0.045667 | 0.089134 |
| MANBA     | 0.18262  | 0.014694 | 0.034276 |
| MANEAL    | -0.14863 | 0.047707 | 0.092386 |
| MANEA     | -0.33654 | 4.37E-06 | 3.16E-05 |
| MANF      | 0.088849 | 0.238249 | 0.342404 |
| MANSC1    | 0.149803 | 0.045955 | 0.089563 |
| MAOA      | -0.06287 | 0.404455 | 0.517081 |
| MAOB      | 0.23448  | 0.001631 | 0.00524  |
| MAP1A     | -0.1978  | 0.008131 | 0.020728 |
| MAP1B     | -0.30309 | 3.91E-05 | 0.000212 |
| MAP1D     | -0.16065 | 0.032184 | 0.066438 |
| MAP1LC3A  | -0.04691 | 0.534071 | 0.637879 |
| MAP1LC3B2 | 0.015766 | 0.834549 | 0.882716 |
| MAP1LC3B  | 0.118405 | 0.115456 | 0.191577 |
| MAP1LC3C  | -0.11219 | 0.135957 | 0.218311 |
| MAP1S     | 0.189341 | 0.011365 | 0.027554 |
| MAP2K1    | -0.01792 | 0.812333 | 0.867188 |
| MAP2K2    | 0.100917 | 0.180133 | 0.27347  |
| MAP2K3    | 0.193595 | 0.009619 | 0.023895 |
| MAP2K4    | -0.44816 | 3.54E-10 | 8.62E-09 |
| MAP2K5    | -0.22769 | 0.002238 | 0.006881 |
| MAP2K6    | -0.27694 | 0.000182 | 0.000799 |
| MAP2K7    | 0.037572 | 0.618539 | 0.713011 |
| MAP2      | -0.36523 | 5.37E-07 | 5.06E-06 |
| MAP3K10   | -0.11613 | 0.122662 | 0.200705 |
| MAP3K11   | 0.26905  | 0.000282 | 0.001163 |
| MAP3K12   | -0.22984 | 0.002027 | 0.006307 |
| MAP3K13   | 0.145022 | 0.05343  | 0.101452 |
| MAP3K14   | -0.21985 | 0.003192 | 0.009311 |
| MAP3K15   | -0.30611 | 3.25E-05 | 0.000181 |
| MAP3K1    | 0.0578   | 0.443465 | 0.555145 |
| MAP3K2    | -0.04673 | 0.535635 | 0.639207 |
| MAP3K3    | -0.28999 | 8.62E-05 | 0.000418 |
| MAP3K4    | -0.38513 | 1.11E-07 | 1.27E-06 |
| MAP3K5    | 0.014264 | 0.850113 | 0.895036 |
| MAP3K6    | 0.463993 | 6.89E-11 | 2.03E-09 |

|           |          |          |          |
|-----------|----------|----------|----------|
| MAP3K7    | -0.2225  | 0.002835 | 0.00842  |
| MAP3K8    | 0.110883 | 0.14062  | 0.224322 |
| MAP3K9    | -0.1061  | 0.15866  | 0.247133 |
| MAP4K1    | 0.00542  | 0.942758 | 0.961528 |
| MAP4K2    | 0.1089   | 0.147903 | 0.23356  |
| MAP4K3    | 0.044204 | 0.557951 | 0.659161 |
| MAP4K4    | 0.431724 | 1.78E-09 | 3.49E-08 |
| MAP4K5    | 0.027435 | 0.716215 | 0.793554 |
| MAP4      | 0.185951 | 0.01295  | 0.030774 |
| MAP6D1    | -0.29034 | 8.45E-05 | 0.000411 |
| MAP6      | -0.24535 | 0.000964 | 0.003326 |
| MAP7D1    | 0.298051 | 5.33E-05 | 0.000277 |
| MAP7D2    | -0.42031 | 5.19E-09 | 8.96E-08 |
| MAP7D3    | -0.21307 | 0.004296 | 0.012017 |
| MAP7      | -0.13511 | 0.072158 | 0.13054  |
| MAP9      | -0.21475 | 0.003994 | 0.011311 |
| MAPK10    | -0.38001 | 1.68E-07 | 1.84E-06 |
| MAPK11    | -0.14435 | 0.054566 | 0.103312 |
| MAPK12    | -0.17587 | 0.018862 | 0.042273 |
| MAPK13    | 0.106496 | 0.157113 | 0.245399 |
| MAPK14    | -0.02087 | 0.782145 | 0.845328 |
| MAPK15    | 0.26474  | 0.000355 | 0.001422 |
| MAPK1IP1I | -0.10548 | 0.161135 | 0.250297 |
| MAPK1     | -0.28167 | 0.00014  | 0.000636 |
| MAPK3     | 0.369681 | 3.80E-07 | 3.76E-06 |
| MAPK4     | -0.32357 | 1.05E-05 | 6.81E-05 |
| MAPK6     | 0.00221  | 0.976646 | 0.983961 |
| MAPK7     | 0.110022 | 0.143748 | 0.228256 |
| MAPK8IP1  | -0.38774 | 8.93E-08 | 1.06E-06 |
| MAPK8IP2  | -0.27539 | 0.000199 | 0.000862 |
| MAPK8IP3  | 0.084765 | 0.260603 | 0.367217 |
| MAPK8     | -0.25227 | 0.000681 | 0.00247  |
| MAPK9     | -0.30957 | 2.61E-05 | 0.000149 |
| MAPKAP1   | -0.10895 | 0.147734 | 0.233349 |
| MAPKAPK2  | 0.083376 | 0.268528 | 0.376133 |
| MAPKAPK3  | 0.262492 | 0.000401 | 0.001572 |
| MAPKAPK5  | -0.15968 | 0.033247 | 0.068332 |
| MAPKBP1   | -0.26723 | 0.000311 | 0.001266 |
| MAPKSP1   | -0.10624 | 0.158115 | 0.246535 |
| MAPRE1    | -0.21697 | 0.003625 | 0.010389 |
| MAPRE2    | -0.41424 | 9.03E-09 | 1.45E-07 |
| MAPRE3    | -0.18678 | 0.012548 | 0.029988 |
| MAPT      | -0.32138 | 1.22E-05 | 7.72E-05 |
| 10-Mar    | -0.20997 | 0.004907 | 0.013484 |
| 11-Mar    | -0.40656 | 1.79E-08 | 2.61E-07 |
| 1-Mar     | -0.09223 | 0.220809 | 0.322663 |
| 2-Mar     | 0.145262 | 0.053032 | 0.100831 |
| 3-Mar     | -0.09351 | 0.214425 | 0.315198 |
| 4-Mar     | -0.29187 | 7.72E-05 | 0.000379 |
| 5-Mar     | 0.084165 | 0.264004 | 0.371269 |
| 6-Mar     | -0.21935 | 0.003263 | 0.009487 |
| 7-Mar     | 0.083786 | 0.266168 | 0.373622 |
| 8-Mar     | -0.4005  | 3.04E-08 | 4.10E-07 |
| 9-Mar     | 0.07367  | 0.328425 | 0.44035  |

|          |          |          |          |
|----------|----------|----------|----------|
| MARCKSL1 | 0.355692 | 1.10E-06 | 9.47E-06 |
| MARCKS   | -0.07322 | 0.331379 | 0.443528 |
| MARCO    | 0.373896 | 2.73E-07 | 2.82E-06 |
| MARK1    | -0.46823 | 4.38E-11 | 1.37E-09 |
| MARK2    | 0.210209 | 0.004858 | 0.013371 |
| MARK3    | 0.003    | 0.968295 | 0.978318 |
| MARK4    | 0.102221 | 0.174543 | 0.266907 |
| MARS2    | -0.11924 | 0.112899 | 0.188251 |
| MARS     | -0.28866 | 9.32E-05 | 0.000447 |
| MARVELD1 | 0.201027 | 0.007131 | 0.0185   |
| MARVELD2 | 0.022597 | 0.764639 | 0.83223  |
| MARVELD3 | 0.203054 | 0.00656  | 0.017278 |
| MAS1L    | -0.16262 | 0.0301   | 0.062831 |
| MAS1     | -0.14786 | 0.04888  | 0.094196 |
| MASP1    | 0.130655 | 0.082153 | 0.145346 |
| MASP2    | -0.32203 | 1.17E-05 | 7.44E-05 |
| MAST1    | -0.25617 | 0.000558 | 0.002086 |
| MAST2    | 0.179661 | 0.016411 | 0.037607 |
| MAST3    | -0.27294 | 0.000228 | 0.000967 |
| MAST4    | -0.22754 | 0.002254 | 0.006918 |
| MASTL    | 0.119769 | 0.111297 | 0.186302 |
| MAT1A    | -0.08104 | 0.282214 | 0.390901 |
| MAT2A    | 0.144628 | 0.05409  | 0.102567 |
| MAT2B    | 0.183264 | 0.014341 | 0.033544 |
| MATK     | 0.004062 | 0.957087 | 0.97058  |
| MATN1    | -0.05253 | 0.486201 | 0.595008 |
| MATN2    | -0.06114 | 0.417526 | 0.529905 |
| MATN3    | 0.304848 | 3.51E-05 | 0.000193 |
| MATN4    | -0.04004 | 0.595658 | 0.692956 |
| MATR3    | -0.35304 | 1.34E-06 | 1.12E-05 |
| MAVS     | -0.43061 | 1.98E-09 | 3.82E-08 |
| MAX      | 0.16256  | 0.03016  | 0.062943 |
| MAZ      | 0.049561 | 0.511203 | 0.617428 |
| MBD1     | -0.35555 | 1.11E-06 | 9.54E-06 |
| MBD2     | 0.207889 | 0.005361 | 0.014524 |
| MBD3L1   | -0.22218 | 0.002875 | 0.008529 |
| MBD3     | -0.02436 | 0.746893 | 0.817959 |
| MBD4     | 0.026944 | 0.721081 | 0.797375 |
| MBD5     | -0.20834 | 0.005259 | 0.014296 |
| MBD6     | 0.052731 | 0.484518 | 0.593499 |
| MBIP     | 0.028841 | 0.70235  | 0.78279  |
| MBL1P    | -0.00844 | 0.911008 | 0.937657 |
| MBL2     | -0.04439 | 0.556269 | 0.65769  |
| MBLAC1   | -0.19246 | 0.010062 | 0.02483  |
| MBLAC2   | -0.33522 | 4.79E-06 | 3.43E-05 |
| MBNL1    | -0.08204 | 0.276291 | 0.38423  |
| MBNL2    | 0.075152 | 0.318765 | 0.430491 |
| MBNL3    | -0.06385 | 0.397129 | 0.509858 |
| MBOAT1   | 0.465701 | 5.74E-11 | 1.74E-09 |
| MBOAT2   | 0.528696 | 3.31E-14 | 2.17E-12 |
| MBOAT4   | -0.15239 | 0.042287 | 0.083586 |
| MBOAT7   | 0.181724 | 0.015196 | 0.035223 |
| MBP      | -0.44385 | 5.45E-10 | 1.26E-08 |
| MBTD1    | -0.14975 | 0.046026 | 0.089641 |

|          |          |          |          |
|----------|----------|----------|----------|
| MBTPS1   | -0.17971 | 0.016382 | 0.037558 |
| MBTPS2   | -0.31225 | 2.20E-05 | 0.000129 |
| MB       | 0.158377 | 0.034732 | 0.070804 |
| MC1R     | 0.110488 | 0.142049 | 0.226177 |
| MC2R     | 0.01243  | 0.869197 | 0.909873 |
| MC3R     | -0.27189 | 0.000241 | 0.001016 |
| MC4R     | -0.10829 | 0.150198 | 0.236504 |
| MC5R     | 0.034446 | 0.648055 | 0.737736 |
| MCAM     | -0.10419 | 0.166335 | 0.256801 |
| MCART1   | -0.47778 | 1.54E-11 | 5.25E-10 |
| MCART2   | -0.25617 | 0.000558 | 0.002086 |
| MCART3P  | -0.13519 | 0.07199  | 0.130288 |
| MCART6   | -0.29176 | 7.77E-05 | 0.000381 |
| MCAT     | 0.046166 | 0.540594 | 0.643723 |
| MCCC1    | -0.1897  | 0.011209 | 0.027246 |
| MCCC2    | 0.088109 | 0.242196 | 0.346695 |
| MCCD1    | -0.02715 | 0.719022 | 0.795542 |
| MCC      | -0.12696 | 0.091259 | 0.158197 |
| MCEE     | -0.1167  | 0.12084  | 0.198381 |
| MCF2L2   | -0.39825 | 3.68E-08 | 4.85E-07 |
| MCF2L    | -0.372   | 3.17E-07 | 3.21E-06 |
| MCF2     | -0.02263 | 0.764263 | 0.831959 |
| MCFD2    | -0.06388 | 0.396898 | 0.509627 |
| MCHR1    | 0.021562 | 0.775122 | 0.840034 |
| MCHR2    | -0.08837 | 0.240799 | 0.345203 |
| MCL1     | 0.116377 | 0.121867 | 0.199668 |
| MCM10    | 0.319772 | 1.36E-05 | 8.45E-05 |
| MCM2     | 0.191502 | 0.010446 | 0.02564  |
| MCM3APAS | 0.024606 | 0.744411 | 0.815864 |
| MCM3AP   | -0.20967 | 0.004971 | 0.013631 |
| MCM3     | 0.071864 | 0.340459 | 0.452739 |
| MCM4     | 0.167559 | 0.025378 | 0.054289 |
| MCM5     | 0.17531  | 0.019252 | 0.042994 |
| MCM6     | 0.176754 | 0.018266 | 0.041105 |
| MCM7     | 0.157306 | 0.035993 | 0.072982 |
| MCM8     | -0.03589 | 0.634347 | 0.726028 |
| MCM9     | -0.08131 | 0.280623 | 0.389024 |
| MCOLN1   | -0.15939 | 0.03357  | 0.068838 |
| MCOLN2   | 0.027453 | 0.716041 | 0.793532 |
| MCOLN3   | -0.37948 | 1.75E-07 | 1.91E-06 |
| MCPH1    | -0.06786 | 0.3681   | 0.481593 |
| MCRS1    | -0.02744 | 0.716198 | 0.793554 |
| MCTP1    | -0.10807 | 0.151044 | 0.237646 |
| MCTP2    | -0.12831 | 0.087846 | 0.153451 |
| MCTS1    | 0.059704 | 0.428567 | 0.540564 |
| MDC1     | -0.46393 | 6.93E-11 | 2.04E-09 |
| MDFIC    | 0.180655 | 0.015816 | 0.036437 |
| MDFI     | 0.504856 | 6.67E-13 | 3.20E-11 |
| MDGA1    | -0.14323 | 0.056472 | 0.106229 |
| MDGA2    | 0.006974 | 0.926384 | 0.948943 |
| MDH1B    | -0.29259 | 7.39E-05 | 0.000366 |
| MDH1     | 0.056067 | 0.457279 | 0.5683   |
| MDH2     | -0.00821 | 0.913345 | 0.939516 |
| MDK      | 0.378643 | 1.87E-07 | 2.03E-06 |

|        |          |          |          |
|--------|----------|----------|----------|
| MDM1   | -0.34246 | 2.88E-06 | 2.20E-05 |
| MDM2   | -0.23332 | 0.001723 | 0.005489 |
| MDM4   | 0.044282 | 0.557254 | 0.658566 |
| MDN1   | -0.37784 | 2.00E-07 | 2.14E-06 |
| MDP1   | -0.06135 | 0.415896 | 0.528259 |
| MDS2   | -0.11557 | 0.124491 | 0.20326  |
| ME1    | -0.43291 | 1.59E-09 | 3.16E-08 |
| ME2    | -0.44184 | 6.65E-10 | 1.49E-08 |
| ME3    | 0.109097 | 0.147166 | 0.232721 |
| MEA1   | 0.090352 | 0.230371 | 0.333751 |
| MEAF6  | -0.25665 | 0.000544 | 0.002045 |
| MECOM  | 0.385315 | 1.09E-07 | 1.26E-06 |
| MECP2  | -0.42521 | 3.29E-09 | 6.02E-08 |
| MECR   | 0.370812 | 3.48E-07 | 3.48E-06 |
| MED10  | -0.07757 | 0.303412 | 0.413788 |
| MED11  | -0.08524 | 0.257952 | 0.364338 |
| MED12L | -0.28733 | 0.000101 | 0.000478 |
| MED12  | -0.21316 | 0.004279 | 0.011978 |
| MED13L | -0.3917  | 6.42E-08 | 7.90E-07 |
| MED13  | -0.2933  | 7.09E-05 | 0.000353 |
| MED14  | -0.15929 | 0.033684 | 0.069051 |
| MED15  | 0.378721 | 1.86E-07 | 2.01E-06 |
| MED16  | 0.006725 | 0.929012 | 0.950941 |
| MED17  | -0.00247 | 0.973876 | 0.982171 |
| MED18  | 0.155688 | 0.037971 | 0.076297 |
| MED19  | 0.271488 | 0.000247 | 0.001036 |
| MED1   | -0.11605 | 0.122915 | 0.201085 |
| MED20  | -0.24388 | 0.001036 | 0.003537 |
| MED21  | -0.06419 | 0.394618 | 0.507314 |
| MED22  | -0.29515 | 6.35E-05 | 0.000321 |
| MED23  | -0.43509 | 1.29E-09 | 2.62E-08 |
| MED24  | -0.07313 | 0.331975 | 0.444236 |
| MED25  | 0.149834 | 0.045909 | 0.089492 |
| MED26  | 0.037783 | 0.616575 | 0.711286 |
| MED27  | -0.1399  | 0.062533 | 0.115661 |
| MED28  | -0.14334 | 0.056287 | 0.105982 |
| MED29  | -0.0699  | 0.353852 | 0.466782 |
| MED30  | 0.057405 | 0.446595 | 0.557817 |
| MED31  | -0.33526 | 4.77E-06 | 3.42E-05 |
| MED4   | 0.240927 | 0.001197 | 0.004009 |
| MED6   | 0.108185 | 0.150597 | 0.237075 |
| MED7   | 0.248776 | 0.000812 | 0.002884 |
| MED8   | 0.040588 | 0.590635 | 0.68843  |
| MED9   | -0.41131 | 1.18E-08 | 1.81E-07 |
| MEF2A  | -0.10899 | 0.14756  | 0.23318  |
| MEF2B  | 0.171379 | 0.022177 | 0.048403 |
| MEF2C  | -0.09833 | 0.191634 | 0.287553 |
| MEF2D  | -0.10519 | 0.162289 | 0.251774 |
| MEFV   | -0.07013 | 0.352267 | 0.465038 |
| MEG3   | -0.09295 | 0.217184 | 0.318494 |
| MEG8   | -0.27464 | 0.000207 | 0.000893 |
| MEGF10 | 0.053817 | 0.475557 | 0.585314 |
| MEGF11 | 0.021142 | 0.779391 | 0.843181 |
| MEGF6  | 0.467377 | 4.80E-11 | 1.48E-09 |

|           |          |          |          |
|-----------|----------|----------|----------|
| MEGF8     | -0.33926 | 3.61E-06 | 2.67E-05 |
| MEGF9     | -0.42009 | 5.30E-09 | 9.10E-08 |
| MEI1      | 0.006048 | 0.936144 | 0.956556 |
| MEIG1     | -0.13097 | 0.081406 | 0.144318 |
| MEIS1     | 0.099057 | 0.188338 | 0.283489 |
| MEIS2     | -0.06229 | 0.408828 | 0.520921 |
| MEIS3P1   | 0.006515 | 0.931219 | 0.952658 |
| MEIS3     | -0.01742 | 0.817456 | 0.870765 |
| MELK      | 0.372115 | 3.15E-07 | 3.19E-06 |
| MEMO1     | 0.283594 | 0.000125 | 0.000578 |
| MEN1      | 0.169274 | 0.023896 | 0.05164  |
| MEOX1     | 0.046264 | 0.539735 | 0.642934 |
| MEOX2     | -0.01291 | 0.864242 | 0.90591  |
| MEP1A     | -0.10632 | 0.157804 | 0.246186 |
| MEP1B     | -0.25113 | 0.000721 | 0.0026   |
| MEPCE     | -0.00809 | 0.914645 | 0.940471 |
| MEPE      | 0.015074 | 0.841708 | 0.888272 |
| MERTK     | -0.26302 | 0.00039  | 0.001536 |
| MESDC1    | 0.068238 | 0.365439 | 0.478682 |
| MESDC2    | -0.02316 | 0.758989 | 0.827988 |
| MESP1     | -0.16621 | 0.026602 | 0.056586 |
| MESP2     | 0.059295 | 0.431744 | 0.543639 |
| MESTIT1   | -0.29392 | 6.83E-05 | 0.000342 |
| MEST      | -0.03098 | 0.681461 | 0.766159 |
| METAP1    | 0.270536 | 0.00026  | 0.001085 |
| METAP2    | -0.35649 | 1.04E-06 | 8.98E-06 |
| METRNL    | 0.453441 | 2.07E-10 | 5.34E-09 |
| METRNL    | 0.048501 | 0.520287 | 0.6259   |
| METT10D   | -0.53949 | 7.85E-15 | 5.90E-13 |
| METT11D1  | 0.196846 | 0.008449 | 0.021398 |
| METT5D1   | -0.0087  | 0.908215 | 0.935784 |
| METTLL10  | -0.06412 | 0.395136 | 0.507892 |
| METTLL11A | 0.158229 | 0.034903 | 0.071086 |
| METTLL11B | 0.242346 | 0.001117 | 0.003777 |
| METTLL12  | -0.01553 | 0.836971 | 0.88494  |
| METTLL13  | 0.07669  | 0.308931 | 0.419302 |
| METTLL14  | -0.34572 | 2.28E-06 | 1.79E-05 |
| METTLL1   | 0.129462 | 0.08501  | 0.149421 |
| METTLL2A  | 0.037121 | 0.622764 | 0.716648 |
| METTLL2B  | -0.14568 | 0.052345 | 0.099755 |
| METTLL3   | -0.23611 | 0.001509 | 0.004895 |
| METTLL4   | -0.06366 | 0.39859  | 0.511202 |
| METTLL5   | 0.331522 | 6.17E-06 | 4.28E-05 |
| METTLL6   | -0.00844 | 0.910989 | 0.937657 |
| METTLL7A  | -0.33552 | 4.69E-06 | 3.36E-05 |
| METTLL7B  | 0.352225 | 1.42E-06 | 1.18E-05 |
| METTLL8   | 0.102358 | 0.173964 | 0.266211 |
| METTLL9   | -0.0145  | 0.847671 | 0.892823 |
| MET       | 0.502655 | 8.71E-13 | 4.03E-11 |
| MEX3A     | 0.195697 | 0.008847 | 0.022219 |
| MEX3B     | -0.03881 | 0.607051 | 0.702923 |
| MEX3C     | -0.17747 | 0.017793 | 0.040237 |
| MEX3D     | 0.344216 | 2.54E-06 | 1.96E-05 |
| MFAP1     | 0.005735 | 0.939435 | 0.959131 |

|          |          |          |          |
|----------|----------|----------|----------|
| MFAP2    | 0.371895 | 3.20E-07 | 3.24E-06 |
| MFAP3L   | -0.11831 | 0.115762 | 0.191973 |
| MFAP3    | -0.21168 | 0.004561 | 0.012661 |
| MFAP4    | -0.02605 | 0.729954 | 0.804487 |
| MFAP5    | 0.266833 | 0.000318 | 0.001289 |
| MFF      | 0.109875 | 0.144288 | 0.228967 |
| MFGES    | 0.209575 | 0.004991 | 0.013674 |
| MFHAS1   | -0.08176 | 0.27792  | 0.386061 |
| MFI2     | 0.448049 | 3.58E-10 | 8.68E-09 |
| MFN1     | 0.07683  | 0.308049 | 0.418483 |
| MFN2     | -0.17335 | 0.020669 | 0.045653 |
| MFNG     | -0.00106 | 0.988823 | 0.991989 |
| MFRP     | 0.210727 | 0.004752 | 0.013119 |
| MFSD10   | 0.373404 | 2.84E-07 | 2.91E-06 |
| MFSD11   | 0.028369 | 0.706996 | 0.786683 |
| MFSD1    | -0.14252 | 0.057721 | 0.108135 |
| MFSD2A   | 0.360578 | 7.65E-07 | 6.90E-06 |
| MFSD2B   | 0.488751 | 4.47E-12 | 1.74E-10 |
| MFSD3    | 0.096609 | 0.199544 | 0.297296 |
| MFSD4    | 0.191032 | 0.01064  | 0.026049 |
| MFSD5    | 0.256845 | 0.000538 | 0.002027 |
| MFSD6L   | -0.02683 | 0.72223  | 0.798243 |
| MFSD6    | -0.10168 | 0.176851 | 0.269419 |
| MFSD7    | 0.434089 | 1.42E-09 | 2.85E-08 |
| MFSD8    | -0.1825  | 0.014762 | 0.0344   |
| MFSD9    | 0.1278   | 0.089126 | 0.15522  |
| MGAM     | -0.18136 | 0.015405 | 0.035636 |
| MGAT1    | -0.21072 | 0.004753 | 0.01312  |
| MGAT2    | 0.027777 | 0.712838 | 0.79118  |
| MGAT3    | 0.309939 | 2.55E-05 | 0.000146 |
| MGAT4A   | -0.41359 | 9.57E-09 | 1.52E-07 |
| MGAT4B   | 0.532547 | 1.99E-14 | 1.38E-12 |
| MGAT4C   | -0.30615 | 3.24E-05 | 0.000181 |
| MGAT5B   | -0.19951 | 0.007586 | 0.019527 |
| MGAT5    | -0.15436 | 0.039658 | 0.079156 |
| MGA      | -0.28798 | 9.70E-05 | 0.000463 |
| MGC12916 | -0.10657 | 0.156826 | 0.245113 |
| MGC12982 | 0.370952 | 3.45E-07 | 3.45E-06 |
| MGC14436 | -0.22188 | 0.002915 | 0.008629 |
| MGC15885 | -0.01908 | 0.800469 | 0.859591 |
| MGC16025 | -0.13966 | 0.062989 | 0.116308 |
| MGC16121 | 0.05998  | 0.426431 | 0.538596 |
| MGC16142 | -0.23022 | 0.001991 | 0.006209 |
| MGC16275 | -0.26113 | 0.00043  | 0.001673 |
| MGC16384 | -0.08571 | 0.255298 | 0.361682 |
| MGC16703 | -0.35527 | 1.14E-06 | 9.71E-06 |
| MGC21881 | -0.27976 | 0.000156 | 0.000699 |
| MGC23270 | -0.26014 | 0.000453 | 0.001747 |
| MGC23284 | -0.21953 | 0.003237 | 0.009423 |
| MGC27382 | 0.010414 | 0.890269 | 0.923663 |
| MGC2752  | -0.22674 | 0.002338 | 0.007135 |
| MGC2889  | -0.33857 | 3.79E-06 | 2.79E-05 |
| MGC29506 | 0.072129 | 0.338675 | 0.450852 |
| MGC34034 | -0.00385 | 0.959352 | 0.972184 |

|          |          |          |          |
|----------|----------|----------|----------|
| MGC3771  | -0.23255 | 0.001786 | 0.00566  |
| MGC42105 | -0.39074 | 6.96E-08 | 8.48E-07 |
| MGC4473  | -0.0462  | 0.540301 | 0.643454 |
| MGC45800 | 0.072441 | 0.336584 | 0.448854 |
| MGC57346 | 0.039643 | 0.599316 | 0.696086 |
| MGC70857 | 0.266471 | 0.000324 | 0.00131  |
| MGC72080 | 0.070505 | 0.349688 | 0.462216 |
| MGC87042 | 0.187869 | 0.012031 | 0.028946 |
| MGEA5    | 0.030002 | 0.690968 | 0.77368  |
| MGLL     | 0.465896 | 5.62E-11 | 1.71E-09 |
| MGMT     | 0.38556  | 1.07E-07 | 1.23E-06 |
| MGP      | -0.00286 | 0.969766 | 0.979394 |
| MGRN1    | 0.031164 | 0.679641 | 0.764418 |
| MGST1    | 0.392345 | 6.08E-08 | 7.54E-07 |
| MGST2    | 0.321255 | 1.23E-05 | 7.78E-05 |
| MGST3    | 0.317189 | 1.60E-05 | 9.78E-05 |
| MIA2     | -0.06377 | 0.397759 | 0.510567 |
| MIA3     | -0.2942  | 6.72E-05 | 0.000337 |
| MIAT     | -0.00861 | 0.909187 | 0.936466 |
| MIA      | 0.413274 | 9.85E-09 | 1.56E-07 |
| MIB1     | -0.17259 | 0.021235 | 0.046675 |
| MIB2     | 0.078332 | 0.298661 | 0.408673 |
| MICAL1   | -0.02365 | 0.753969 | 0.82377  |
| MICAL2   | 0.173915 | 0.02025  | 0.044888 |
| MICAL3   | -0.16908 | 0.024061 | 0.051913 |
| MICALCL  | 0.284205 | 0.000121 | 0.000561 |
| MICALL1  | 0.222395 | 0.002848 | 0.008458 |
| MICALL2  | 0.43759  | 1.01E-09 | 2.14E-08 |
| MICA     | 0.436079 | 1.17E-09 | 2.42E-08 |
| MICB     | 0.19759  | 0.0082   | 0.020871 |
| MID1IP1  | 0.118344 | 0.115644 | 0.191809 |
| MID1     | -0.22691 | 0.00232  | 0.00709  |
| MID2     | -0.35795 | 9.32E-07 | 8.15E-06 |
| MIDN     | 0.345427 | 2.33E-06 | 1.82E-05 |
| MIER1    | 0.031216 | 0.679141 | 0.763986 |
| MIER2    | 0.218684 | 0.003361 | 0.009721 |
| MIER3    | -0.23708 | 0.001441 | 0.004705 |
| MIF4GD   | -0.08218 | 0.2755   | 0.383454 |
| MIF      | 0.207891 | 0.00536  | 0.014524 |
| MIIP     | 0.252573 | 0.000671 | 0.002436 |
| MIMT1    | -0.27645 | 0.000187 | 0.000818 |
| MINA     | 0.022257 | 0.768082 | 0.83483  |
| MINK1    | -0.29725 | 5.60E-05 | 0.000288 |
| MINPP1   | -0.34499 | 2.41E-06 | 1.87E-05 |
| MIOS     | -0.27418 | 0.000213 | 0.00091  |
| MIOX     | 0.313746 | 2.00E-05 | 0.000119 |
| MIPEP    | 0.276618 | 0.000186 | 0.000812 |
| MIPOL1   | 0.145111 | 0.053282 | 0.10121  |
| MIP      | -0.01117 | 0.88237  | 0.918267 |
| MIR155HG | 0.150815 | 0.044489 | 0.0872   |
| MIR17HG  | 0.186633 | 0.012617 | 0.030123 |
| MIS12    | -0.48016 | 1.18E-11 | 4.15E-10 |
| MITD1    | 0.428733 | 2.36E-09 | 4.48E-08 |
| MITF     | 0.292177 | 7.58E-05 | 0.000373 |



|         |          |          |          |
|---------|----------|----------|----------|
| MIXL1   | -0.02809 | 0.70976  | 0.788605 |
| MKI67IP | 0.292295 | 7.53E-05 | 0.000371 |
| MKI67   | 0.348269 | 1.90E-06 | 1.52E-05 |
| MKKS    | -0.35326 | 1.32E-06 | 1.10E-05 |
| MKL1    | 0.248907 | 0.000807 | 0.002867 |
| MKL2    | -0.29597 | 6.04E-05 | 0.000308 |
| MKLN1   | -0.18452 | 0.013675 | 0.032246 |
| MKNK1   | -0.1817  | 0.015208 | 0.035234 |
| MKNK2   | 0.158874 | 0.034159 | 0.069866 |
| MKRN1   | -0.13068 | 0.082091 | 0.145258 |
| MKRN2   | -0.11834 | 0.115661 | 0.191821 |
| MKRN3   | 0.010991 | 0.884234 | 0.919625 |
| MKS1    | -0.19579 | 0.008815 | 0.022168 |
| MKX     | -0.02718 | 0.718752 | 0.795466 |
| MLANA   | -0.25801 | 0.000507 | 0.001923 |
| MLC1    | 0.102099 | 0.175062 | 0.267393 |
| MLEC    | -0.48539 | 6.56E-12 | 2.49E-10 |
| MLF1IP  | 0.299616 | 4.85E-05 | 0.000256 |
| MLF1    | -0.14458 | 0.054169 | 0.102668 |
| MLF2    | -0.09298 | 0.217047 | 0.318318 |
| MLH1    | -0.30614 | 3.24E-05 | 0.000181 |
| MLH3    | -0.03946 | 0.601031 | 0.697448 |
| MLKL    | 0.505628 | 6.08E-13 | 2.95E-11 |
| MLL2    | -0.40274 | 2.50E-08 | 3.50E-07 |
| MLL3    | -0.35479 | 1.18E-06 | 9.99E-06 |
| MLL4    | -0.06566 | 0.383897 | 0.496805 |
| MLL5    | -0.1153  | 0.125372 | 0.204463 |
| MLLT10  | -0.2563  | 0.000554 | 0.002074 |
| MLLT11  | -0.00576 | 0.939218 | 0.959055 |
| MLLT1   | -0.01821 | 0.809328 | 0.865015 |
| MLLT3   | -0.01399 | 0.852925 | 0.897166 |
| MLLT4   | -0.21092 | 0.004713 | 0.01302  |
| MLLT6   | -0.04161 | 0.581334 | 0.680102 |
| MLL     | -0.1863  | 0.012781 | 0.030456 |
| MLNR    | -0.06558 | 0.38445  | 0.497261 |
| MLN     | -0.07291 | 0.333445 | 0.445629 |
| MLPH    | 0.502981 | 8.37E-13 | 3.89E-11 |
| MLST8   | -0.02772 | 0.71342  | 0.791515 |
| MLXIPL  | -0.01981 | 0.793016 | 0.853367 |
| MLXIP   | -0.40735 | 1.67E-08 | 2.44E-07 |
| MLX     | 0.297503 | 5.51E-05 | 0.000285 |
| MLYCD   | -0.29977 | 4.80E-05 | 0.000254 |
| MMAA    | 0.118186 | 0.116137 | 0.192336 |
| MMAB    | -0.18617 | 0.012844 | 0.03058  |
| MMACHC  | -0.04328 | 0.566252 | 0.666651 |
| MMADHC  | 0.188748 | 0.01163  | 0.028092 |
| MMD2    | -0.36237 | 6.67E-07 | 6.13E-06 |
| MMD     | 0.067295 | 0.372118 | 0.485246 |
| MMEL1   | 0.557536 | 6.29E-16 | 6.10E-14 |
| MME     | 0.130534 | 0.082438 | 0.145768 |
| MMGT1   | -0.32819 | 7.74E-06 | 5.20E-05 |
| MMP10   | 0.266764 | 0.000319 | 0.001294 |
| MMP11   | 0.480702 | 1.11E-11 | 3.94E-10 |
| MMP12   | 0.286702 | 0.000105 | 0.000494 |

|         |          |          |          |
|---------|----------|----------|----------|
| MMP13   | 0.302617 | 4.03E-05 | 0.000218 |
| MMP14   | 0.384341 | 1.18E-07 | 1.35E-06 |
| MMP15   | 0.1795   | 0.016509 | 0.037792 |
| MMP16   | -0.21471 | 0.004002 | 0.011328 |
| MMP17   | 0.153233 | 0.041147 | 0.081641 |
| MMP19   | 0.067755 | 0.368852 | 0.482258 |
| MMP1    | 0.351221 | 1.53E-06 | 1.26E-05 |
| MMP20   | -0.042   | 0.577732 | 0.676781 |
| MMP21   | -0.13412 | 0.074277 | 0.133657 |
| MMP23A  | 0.020982 | 0.781019 | 0.844435 |
| MMP23B  | 0.293627 | 6.95E-05 | 0.000347 |
| MMP24   | -0.24688 | 0.000893 | 0.003122 |
| MMP25   | -0.02293 | 0.761248 | 0.829636 |
| MMP26   | -0.27096 | 0.000254 | 0.001062 |
| MMP27   | -0.08088 | 0.283187 | 0.391974 |
| MMP28   | 1        | 1.00E-31 | 1.00E-27 |
| MMP2    | 0.190472 | 0.010875 | 0.02655  |
| MMP3    | 0.058879 | 0.434986 | 0.546572 |
| MMP7    | 0.482377 | 9.23E-12 | 3.34E-10 |
| MMP8    | 0.234233 | 0.00165  | 0.005293 |
| MMP9    | 0.312171 | 2.21E-05 | 0.000129 |
| MMRN1   | -0.30453 | 3.58E-05 | 0.000196 |
| MMRN2   | -0.20423 | 0.006249 | 0.016556 |
| MMS19   | 0.132568 | 0.07773  | 0.138772 |
| MN1     | 0.057402 | 0.446615 | 0.557817 |
| MNAT1   | 0.144778 | 0.053837 | 0.102147 |
| MND1    | 0.284004 | 0.000122 | 0.000566 |
| MNDA    | 0.020664 | 0.784255 | 0.846932 |
| MNS1    | 0.133347 | 0.075986 | 0.136186 |
| MNT     | -0.15242 | 0.042239 | 0.083499 |
| MNX1    | -0.02489 | 0.741541 | 0.81363  |
| MOAP1   | -0.37761 | 2.03E-07 | 2.17E-06 |
| MOB2    | 0.175608 | 0.019045 | 0.042612 |
| MOBKL1A | -0.41186 | 1.12E-08 | 1.74E-07 |
| MOBKL1B | 0.156384 | 0.037108 | 0.074841 |
| MOBKL2A | -0.03499 | 0.642835 | 0.733568 |
| MOBKL2B | 0.111099 | 0.139842 | 0.223327 |
| MOBKL2C | -0.07932 | 0.292576 | 0.402212 |
| MOBKL3  | 0.068787 | 0.361583 | 0.474856 |
| MOBP    | -0.02271 | 0.76347  | 0.831553 |
| MOCOS   | 0.414119 | 9.13E-09 | 1.46E-07 |
| MOCS1   | -0.20673 | 0.005628 | 0.015138 |
| MOCS2   | -0.33908 | 3.66E-06 | 2.70E-05 |
| MOCS3   | -0.25545 | 0.000579 | 0.002155 |
| MOGAT1  | 0.169592 | 0.023629 | 0.051176 |
| MOGAT2  | 0.277414 | 0.000178 | 0.000781 |
| MOGAT3  | 0.315493 | 1.79E-05 | 0.000108 |
| MOGS    | 0.051842 | 0.491927 | 0.600492 |
| MOG     | -0.13502 | 0.072351 | 0.130787 |
| MON1A   | 0.025049 | 0.73997  | 0.812492 |
| MON1B   | 0.063687 | 0.398358 | 0.511038 |
| MON2    | -0.40895 | 1.45E-08 | 2.16E-07 |
| MORC1   | -0.0505  | 0.503241 | 0.610383 |
| MORC2   | 0.15541  | 0.03832  | 0.076847 |

|           |          |          |          |
|-----------|----------|----------|----------|
| MORC3     | -0.01882 | 0.803052 | 0.861147 |
| MORC4     | 0.036577 | 0.627878 | 0.720864 |
| MORF4L1   | -0.01388 | 0.854093 | 0.897865 |
| MORF4L2   | -0.17329 | 0.02071  | 0.045715 |
| MORF4     | -0.15377 | 0.040439 | 0.08047  |
| MORN1     | -0.21316 | 0.004279 | 0.011978 |
| MORN2     | -0.17852 | 0.017119 | 0.038931 |
| MORN3     | -0.18401 | 0.013941 | 0.032736 |
| MORN4     | -0.27149 | 0.000247 | 0.001036 |
| MORN5     | -0.20095 | 0.007153 | 0.018541 |
| MOSC1     | 0.102145 | 0.174865 | 0.267257 |
| MOSC2     | 0.149938 | 0.045757 | 0.089265 |
| MOSPD1    | -0.02246 | 0.766041 | 0.833335 |
| MOSPD2    | -0.17081 | 0.02263  | 0.049251 |
| MOSPD3    | 0.377455 | 2.06E-07 | 2.20E-06 |
| MOV10L1   | 0.0073   | 0.922955 | 0.946603 |
| MOV10     | 0.219175 | 0.003289 | 0.009542 |
| MOXD1     | 0.051114 | 0.498035 | 0.605481 |
| MPDU1     | -0.09665 | 0.199377 | 0.297074 |
| MPDZ      | -0.26736 | 0.000309 | 0.001259 |
| MPEG1     | -0.15367 | 0.040568 | 0.080672 |
| MPG       | 0.362848 | 6.44E-07 | 5.94E-06 |
| MPHOSPH1C | -0.00016 | 0.998329 | 0.99859  |
| MPHOSPH6  | 0.181265 | 0.015459 | 0.035741 |
| MPHOSPH8  | -0.21414 | 0.004102 | 0.011575 |
| MPHOSPH9  | -0.41907 | 5.82E-09 | 9.90E-08 |
| MPI       | -0.08388 | 0.265641 | 0.373093 |
| MPL       | -0.22565 | 0.002458 | 0.007451 |
| MPND      | 0.208838 | 0.005149 | 0.014043 |
| MPO       | 0.02901  | 0.700684 | 0.781506 |
| MPP1      | -0.26242 | 0.000402 | 0.001577 |
| MPP2      | -0.31711 | 1.61E-05 | 9.82E-05 |
| MPP3      | 0.334091 | 5.17E-06 | 3.67E-05 |
| MPP4      | -0.0722  | 0.338186 | 0.450375 |
| MPP5      | 0.089611 | 0.234231 | 0.338276 |
| MPP6      | -0.24452 | 0.001004 | 0.003446 |
| MPP7      | -0.17842 | 0.017184 | 0.039058 |
| MPPE1     | 0.149994 | 0.045675 | 0.089141 |
| MPPED1    | -0.25891 | 0.000484 | 0.001848 |
| MPPED2    | -0.28169 | 0.000139 | 0.000636 |
| MPRIP     | 0.208914 | 0.005133 | 0.014007 |
| MPST      | 0.339084 | 3.66E-06 | 2.70E-05 |
| MPV17L2   | 0.076093 | 0.312723 | 0.423663 |
| MPV17L    | -0.13264 | 0.077577 | 0.138562 |
| MPV17     | 0.272074 | 0.000239 | 0.001008 |
| MPZL1     | 0.274832 | 0.000205 | 0.000885 |
| MPZL2     | 0.553064 | 1.19E-15 | 1.08E-13 |
| MPZL3     | 0.091594 | 0.223997 | 0.326192 |
| MPZ       | -0.22711 | 0.002299 | 0.007036 |
| MR1       | 0.309378 | 2.64E-05 | 0.000151 |
| MRAP2     | -0.13635 | 0.069563 | 0.126557 |
| MRAP      | -0.30722 | 3.03E-05 | 0.00017  |
| MRAS      | 0.018717 | 0.804149 | 0.861571 |
| MRC1      | -0.12629 | 0.092995 | 0.160643 |

|          |          |          |          |
|----------|----------|----------|----------|
| MRC2     | 0.209744 | 0.004955 | 0.013595 |
| MRE11A   | 0.039779 | 0.598064 | 0.694944 |
| MREG     | 0.309884 | 2.56E-05 | 0.000147 |
| MRFAP1L1 | -0.18418 | 0.013854 | 0.032567 |
| MRFAP1   | -0.10862 | 0.148937 | 0.234986 |
| MRGPRD   | -0.10306 | 0.171028 | 0.262571 |
| MRGPRE   | -0.18159 | 0.015274 | 0.035366 |
| MRGPRF   | 0.021666 | 0.774067 | 0.839097 |
| MRGPRX2  | -0.14738 | 0.049627 | 0.095422 |
| MRGPRX3  | 0.102812 | 0.172052 | 0.263814 |
| MRGPRX4  | -0.10225 | 0.174435 | 0.266786 |
| MRI1     | 0.236283 | 0.001497 | 0.004858 |
| MRM1     | 0.120678 | 0.108587 | 0.182601 |
| MRO      | -0.30844 | 2.80E-05 | 0.000159 |
| MRP63    | 0.11556  | 0.124525 | 0.203299 |
| MRPL10   | 0.271857 | 0.000242 | 0.001017 |
| MRPL11   | 0.332847 | 5.64E-06 | 3.95E-05 |
| MRPL12   | 0.153124 | 0.041292 | 0.08188  |
| MRPL13   | 0.201512 | 0.006991 | 0.018226 |
| MRPL14   | 0.338588 | 3.79E-06 | 2.78E-05 |
| MRPL15   | 0.197932 | 0.008087 | 0.020632 |
| MRPL16   | 0.354083 | 1.24E-06 | 1.05E-05 |
| MRPL17   | 0.18734  | 0.012279 | 0.02942  |
| MRPL18   | -0.0742  | 0.324974 | 0.437086 |
| MRPL19   | 0.054725 | 0.46813  | 0.578188 |
| MRPL1    | 0.009373 | 0.901175 | 0.931029 |
| MRPL20   | 0.018539 | 0.805977 | 0.862553 |
| MRPL21   | 0.266136 | 0.00033  | 0.00133  |
| MRPL22   | 0.169852 | 0.023413 | 0.050747 |
| MRPL23   | 0.201335 | 0.007042 | 0.018333 |
| MRPL24   | 0.151005 | 0.044218 | 0.086734 |
| MRPL27   | 0.113024 | 0.133064 | 0.21446  |
| MRPL28   | 0.262026 | 0.000411 | 0.001606 |
| MRPL2    | 0.082597 | 0.273039 | 0.381102 |
| MRPL30   | 0.108441 | 0.149628 | 0.235944 |
| MRPL32   | 0.125751 | 0.094416 | 0.16263  |
| MRPL33   | -0.12453 | 0.09769  | 0.167409 |
| MRPL34   | -0.01239 | 0.869593 | 0.91005  |
| MRPL35   | -0.07466 | 0.321921 | 0.433658 |
| MRPL36   | -0.03666 | 0.627103 | 0.720279 |
| MRPL37   | 0.222571 | 0.002826 | 0.008397 |
| MRPL38   | 0.020912 | 0.781731 | 0.84502  |
| MRPL39   | 0.100212 | 0.183211 | 0.277143 |
| MRPL3    | 0.157024 | 0.03633  | 0.073547 |
| MRPL40   | 0.004321 | 0.954352 | 0.968782 |
| MRPL41   | 0.141184 | 0.060137 | 0.111814 |
| MRPL42P5 | 0.052581 | 0.485767 | 0.594624 |
| MRPL42   | -0.22429 | 0.002614 | 0.007854 |
| MRPL43   | 0.055991 | 0.457888 | 0.568736 |
| MRPL44   | 0.214313 | 0.004071 | 0.011499 |
| MRPL45   | -0.01037 | 0.890714 | 0.923847 |
| MRPL46   | 0.104818 | 0.163792 | 0.253637 |
| MRPL47   | 0.205759 | 0.005863 | 0.01567  |
| MRPL48   | 0.23228  | 0.001809 | 0.005722 |

|         |          |          |          |
|---------|----------|----------|----------|
| MRPL49  | 0.153713 | 0.040508 | 0.080576 |
| MRPL4   | 0.199222 | 0.007676 | 0.019715 |
| MRPL50  | -0.03118 | 0.679478 | 0.764321 |
| MRPL51  | -0.04574 | 0.544375 | 0.647292 |
| MRPL52  | 0.303866 | 3.73E-05 | 0.000203 |
| MRPL53  | 0.136888 | 0.068449 | 0.124862 |
| MRPL54  | -0.06082 | 0.419943 | 0.532135 |
| MRPL55  | 0.168281 | 0.024745 | 0.053174 |
| MRPL9   | 0.201317 | 0.007047 | 0.01834  |
| MRPS10  | 0.1817   | 0.01521  | 0.035234 |
| MRPS11  | -0.00761 | 0.919704 | 0.944279 |
| MRPS12  | 0.272056 | 0.000239 | 0.001009 |
| MRPS14  | 0.136798 | 0.068633 | 0.125141 |
| MRPS15  | 0.113079 | 0.132876 | 0.214209 |
| MRPS16  | 0.072551 | 0.335848 | 0.448023 |
| MRPS17  | 0.164957 | 0.027779 | 0.058642 |
| MRPS18A | 0.169334 | 0.023844 | 0.051553 |
| MRPS18B | -0.02193 | 0.771405 | 0.837291 |
| MRPS18C | -0.00973 | 0.897452 | 0.928587 |
| MRPS21  | 0.348545 | 1.86E-06 | 1.49E-05 |
| MRPS22  | 0.245171 | 0.000972 | 0.003352 |
| MRPS23  | 0.07437  | 0.323838 | 0.435855 |
| MRPS24  | 0.058239 | 0.44     | 0.551809 |
| MRPS25  | 0.15658  | 0.036869 | 0.074475 |
| MRPS26  | -0.12776 | 0.089237 | 0.155305 |
| MRPS27  | 0.018726 | 0.80406  | 0.861571 |
| MRPS28  | -0.13479 | 0.072842 | 0.131482 |
| MRPS2   | -0.08708 | 0.247753 | 0.352985 |
| MRPS30  | 0.244472 | 0.001006 | 0.003453 |
| MRPS31  | 0.067496 | 0.370689 | 0.483892 |
| MRPS33  | -0.10429 | 0.165929 | 0.256294 |
| MRPS34  | 0.211539 | 0.004589 | 0.012722 |
| MRPS35  | 0.06858  | 0.363035 | 0.476295 |
| MRPS36  | 0.18938  | 0.011348 | 0.02752  |
| MRPS5   | 0.298128 | 5.30E-05 | 0.000276 |
| MRPS6   | 0.395504 | 4.66E-08 | 6.00E-07 |
| MRPS7   | -0.06186 | 0.412035 | 0.524095 |
| MRPS9   | 0.091296 | 0.225515 | 0.327917 |
| MRRF    | 0.193965 | 0.009479 | 0.023593 |
| MRS2P2  | -0.0855  | 0.25647  | 0.362841 |
| MRS2    | -0.30546 | 3.38E-05 | 0.000187 |
| MRT04   | 0.083179 | 0.269659 | 0.377397 |
| MRV11   | 0.191865 | 0.010298 | 0.025306 |
| MS4A10  | -0.01927 | 0.798457 | 0.858164 |
| MS4A12  | 0.061128 | 0.417618 | 0.52994  |
| MS4A14  | 0.066662 | 0.37664  | 0.4894   |
| MS4A15  | -0.11584 | 0.123595 | 0.201964 |
| MS4A1   | -0.08286 | 0.271526 | 0.379418 |
| MS4A2   | -0.06744 | 0.37107  | 0.484198 |
| MS4A3   | -0.10835 | 0.149963 | 0.236265 |
| MS4A4A  | -0.05005 | 0.507063 | 0.61389  |
| MS4A6A  | -0.03349 | 0.657221 | 0.745862 |
| MS4A6E  | -0.05596 | 0.458171 | 0.568901 |
| MS4A7   | -0.11817 | 0.11618  | 0.192391 |

|        |          |          |          |
|--------|----------|----------|----------|
| MS4A8B | -0.08684 | 0.249084 | 0.354602 |
| MSC    | 0.132946 | 0.07688  | 0.137502 |
| MSGN1  | 0.0928   | 0.217931 | 0.319355 |
| MSH2   | -0.02156 | 0.775173 | 0.840044 |
| MSH3   | -0.13924 | 0.063781 | 0.117572 |
| MSH4   | -0.06152 | 0.414638 | 0.526864 |
| MSH5   | 0.225059 | 0.002525 | 0.007627 |
| MSH6   | -0.26994 | 0.000269 | 0.001115 |
| MSI1   | -0.4131  | 1.00E-08 | 1.58E-07 |
| MSI2   | -0.28854 | 9.39E-05 | 0.000449 |
| MSL1   | 0.173814 | 0.020324 | 0.045019 |
| MSL2   | -0.28682 | 0.000104 | 0.000491 |
| MSL3L2 | 0.375631 | 2.38E-07 | 2.50E-06 |
| MSL3   | -0.08935 | 0.235601 | 0.339586 |
| MSLNL  | 0.413041 | 1.01E-08 | 1.58E-07 |
| MSLN   | 0.661048 | 1.00E-23 | 8.26E-21 |
| MSMB   | 0.12363  | 0.100151 | 0.170797 |
| MSMP   | -0.2342  | 0.001652 | 0.005298 |
| MSN    | 0.259609 | 0.000466 | 0.001787 |
| MSR1   | 0.058757 | 0.435942 | 0.547406 |
| MSRA   | 0.224188 | 0.002627 | 0.00788  |
| MSRB2  | 0.164084 | 0.028627 | 0.060174 |
| MSRB3  | 0.040813 | 0.588574 | 0.686556 |
| MST1P2 | 0.16121  | 0.031576 | 0.065353 |
| MST1P9 | 0.171519 | 0.022067 | 0.048198 |
| MST1R  | 0.625641 | 9.96E-21 | 3.58E-18 |
| MST1   | 0.013673 | 0.856253 | 0.899726 |
| MST4   | 0.316892 | 1.63E-05 | 9.94E-05 |
| MSTN   | -0.1106  | 0.141648 | 0.225629 |
| MSTO1  | -0.03207 | 0.670838 | 0.757817 |
| MSTO2P | -0.00041 | 0.995622 | 0.996932 |
| MSX1   | 0.065101 | 0.38794  | 0.500596 |
| MSX2P1 | -0.19966 | 0.007541 | 0.019429 |
| MSX2   | 0.458702 | 1.20E-10 | 3.30E-09 |
| MT1A   | -0.10098 | 0.179845 | 0.273137 |
| MT1B   | -0.09942 | 0.186733 | 0.281501 |
| MT1DP  | -0.08651 | 0.250879 | 0.356641 |
| MT1E   | -0.00494 | 0.947823 | 0.964718 |
| MT1F   | -0.17274 | 0.021123 | 0.046492 |
| MT1G   | -0.00542 | 0.942741 | 0.961528 |
| MT1H   | -0.01005 | 0.894051 | 0.926182 |
| MT1IP  | 0.007607 | 0.919724 | 0.944279 |
| MT1L   | -0.04577 | 0.544111 | 0.647056 |
| MT1M   | -0.05296 | 0.482647 | 0.591867 |
| MT1X   | -0.0449  | 0.551728 | 0.653873 |
| MT2A   | -0.0111  | 0.883051 | 0.918734 |
| MT3    | -0.28291 | 0.00013  | 0.000598 |
| MTA1   | -0.04937 | 0.512853 | 0.619043 |
| MTA2   | 0.347829 | 1.96E-06 | 1.56E-05 |
| MTA3   | 0.021252 | 0.77827  | 0.842612 |
| MTAP   | 0.073879 | 0.327055 | 0.439079 |
| MTBP   | 0.009639 | 0.898387 | 0.929165 |
| MTCH1  | -0.18998 | 0.011087 | 0.026986 |
| MTCH2  | 0.064622 | 0.391452 | 0.504174 |

|         |          |          |          |
|---------|----------|----------|----------|
| MTCP1NB | -0.18614 | 0.012859 | 0.030607 |
| MTCP1   | 0.06358  | 0.399153 | 0.511725 |
| MTDH    | 0.011614 | 0.877715 | 0.915156 |
| MTERFD1 | 0.072943 | 0.333235 | 0.4455   |
| MTERFD2 | -0.22551 | 0.002474 | 0.007489 |
| MTERFD3 | -0.34825 | 1.90E-06 | 1.52E-05 |
| MTERF   | -0.02118 | 0.778962 | 0.842902 |
| MTF1    | -0.40782 | 1.60E-08 | 2.36E-07 |
| MTF2    | 0.016134 | 0.830744 | 0.880056 |
| MTFMT   | 0.077255 | 0.305371 | 0.41561  |
| MTFR1   | -0.01621 | 0.82997  | 0.879641 |
| MTG1    | 0.048944 | 0.516475 | 0.622617 |
| MTHFD1L | 0.233759 | 0.001687 | 0.005393 |
| MTHFD1  | 0.327888 | 7.90E-06 | 5.28E-05 |
| MTHFD2L | -0.23961 | 0.001276 | 0.004242 |
| MTHFD2  | -0.03803 | 0.614227 | 0.709405 |
| MTHFR   | -0.29324 | 7.11E-05 | 0.000354 |
| MTHFSD  | 0.178571 | 0.017086 | 0.038875 |
| MTHFS   | 0.163319 | 0.029388 | 0.061566 |
| MTIF2   | 0.105145 | 0.162473 | 0.25198  |
| MTIF3   | 0.163412 | 0.029294 | 0.061388 |
| MTL5    | 0.235492 | 0.001554 | 0.005024 |
| MTM1    | -0.1497  | 0.046109 | 0.089784 |
| MTMR10  | -0.11313 | 0.132693 | 0.214036 |
| MTMR11  | 0.434342 | 1.38E-09 | 2.80E-08 |
| MTMR12  | -0.46907 | 4.00E-11 | 1.26E-09 |
| MTMR14  | 0.364607 | 5.63E-07 | 5.29E-06 |
| MTMR15  | -0.34942 | 1.75E-06 | 1.41E-05 |
| MTMR1   | -0.07922 | 0.293224 | 0.402948 |
| MTMR2   | 0.135674 | 0.070961 | 0.128721 |
| MTMR3   | -0.38298 | 1.32E-07 | 1.49E-06 |
| MTMR4   | -0.29705 | 5.66E-05 | 0.000291 |
| MTMR6   | -0.21989 | 0.003186 | 0.009297 |
| MTMR7   | -0.37881 | 1.85E-07 | 2.00E-06 |
| MTMR8   | 0.081457 | 0.279737 | 0.388155 |
| MTMR9L  | 0.056748 | 0.451822 | 0.562686 |
| MTMR9   | -0.15226 | 0.042462 | 0.083896 |
| MTNR1A  | -0.18376 | 0.014075 | 0.032999 |
| MTNR1B  | -0.35048 | 1.62E-06 | 1.32E-05 |
| MT01    | -0.35557 | 1.11E-06 | 9.53E-06 |
| MTOR    | -0.1756  | 0.019051 | 0.04262  |
| MTP18   | 0.374713 | 2.56E-07 | 2.67E-06 |
| MTPAP   | 0.022014 | 0.770539 | 0.836744 |
| MTRF1L  | -0.33399 | 5.21E-06 | 3.69E-05 |
| MTRF1   | 0.225282 | 0.002499 | 0.007557 |
| MTRR    | -0.40912 | 1.43E-08 | 2.14E-07 |
| MTR     | -0.03053 | 0.685828 | 0.769844 |
| MTSS1L  | -0.13882 | 0.064611 | 0.118836 |
| MTSS1   | -0.25457 | 0.000605 | 0.002234 |
| MTTP    | -0.08058 | 0.284988 | 0.39397  |
| MTUS1   | -0.04697 | 0.533525 | 0.637509 |
| MTUS2   | -0.34457 | 2.48E-06 | 1.92E-05 |
| MTVR2   | 0.11241  | 0.135201 | 0.217461 |
| MTX1    | 0.287461 | 1.00E-04 | 0.000475 |

|         |          |          |          |
|---------|----------|----------|----------|
| MTX2    | 0.238713 | 0.001332 | 0.004396 |
| MTX3    | -0.15568 | 0.037984 | 0.076308 |
| MUC12   | 0.158682 | 0.03438  | 0.070253 |
| MUC13   | 0.160626 | 0.032205 | 0.066468 |
| MUC15   | 0.052662 | 0.485093 | 0.594057 |
| MUC16   | 0.383125 | 1.30E-07 | 1.47E-06 |
| MUC17   | 0.447646 | 3.73E-10 | 8.99E-09 |
| MUC1    | 0.572952 | 6.43E-17 | 8.48E-15 |
| MUC20   | 0.493365 | 2.62E-12 | 1.11E-10 |
| MUC21   | 0.417701 | 6.59E-09 | 1.10E-07 |
| MUC2    | 0.032717 | 0.664618 | 0.752529 |
| MUC4    | 0.453733 | 2.01E-10 | 5.21E-09 |
| MUC5B   | 0.350802 | 1.58E-06 | 1.29E-05 |
| MUC6    | 0.150597 | 0.044802 | 0.087731 |
| MUC7    | -0.07287 | 0.333721 | 0.445933 |
| MUCL1   | -0.13094 | 0.081486 | 0.144447 |
| MUDENG  | -0.23986 | 0.001261 | 0.004197 |
| MUL1    | 0.06877  | 0.361702 | 0.474889 |
| MUM1L1  | 0.096458 | 0.200251 | 0.298131 |
| MUM1    | -0.11337 | 0.131862 | 0.213008 |
| MURC    | 0.114246 | 0.128897 | 0.209073 |
| MUS81   | 0.324251 | 1.01E-05 | 6.54E-05 |
| MUSK    | -0.18983 | 0.011153 | 0.027117 |
| MUSTN1  | -0.00032 | 0.996577 | 0.997536 |
| MUTED   | -0.09302 | 0.216852 | 0.318144 |
| MUTYH   | 0.199063 | 0.007726 | 0.019821 |
| MUT     | -0.30924 | 2.67E-05 | 0.000152 |
| MVD     | 0.380994 | 1.55E-07 | 1.72E-06 |
| MVK     | 0.012864 | 0.86468  | 0.906056 |
| MVP     | 0.588677 | 5.54E-18 | 9.69E-16 |
| MX1     | 0.371718 | 3.24E-07 | 3.27E-06 |
| MX2     | 0.358801 | 8.74E-07 | 7.72E-06 |
| MXD1    | 0.365325 | 5.33E-07 | 5.03E-06 |
| MXD3    | 0.352907 | 1.35E-06 | 1.13E-05 |
| MXD4    | -0.39971 | 3.25E-08 | 4.35E-07 |
| MXI1    | 0.055757 | 0.459773 | 0.57029  |
| MXRA5   | 0.39086  | 6.89E-08 | 8.41E-07 |
| MXRA7   | -0.32699 | 8.39E-06 | 5.56E-05 |
| MXRA8   | 0.326751 | 8.53E-06 | 5.64E-05 |
| MYADML2 | -0.13503 | 0.072331 | 0.130773 |
| MYADML  | 0.10746  | 0.153367 | 0.24067  |
| MYADM   | 0.037468 | 0.61951  | 0.713881 |
| MYBBP1A | -0.28744 | 0.0001   | 0.000476 |
| MYBL1   | -0.02494 | 0.741063 | 0.813244 |
| MYBL2   | 0.341702 | 3.04E-06 | 2.30E-05 |
| MYBPC1  | 0.10544  | 0.161293 | 0.250464 |
| MYBPC2  | -0.02912 | 0.699566 | 0.780521 |
| MYBPC3  | 0.179046 | 0.016789 | 0.038304 |
| MYBPHL  | -0.07164 | 0.341961 | 0.45437  |
| MYBPH   | 0.004921 | 0.948021 | 0.964855 |
| MYB     | 0.153611 | 0.040642 | 0.08077  |
| MYCBP2  | -0.29554 | 6.20E-05 | 0.000315 |
| MYCBPAP | -0.13779 | 0.066622 | 0.122048 |
| MYCBP   | 0.149974 | 0.045703 | 0.08917  |



|        |          |          |          |
|--------|----------|----------|----------|
| MYCL1  | 0.013365 | 0.859456 | 0.902063 |
| MYCNOS | -0.11269 | 0.134222 | 0.216062 |
| MYCN   | -0.11614 | 0.12264  | 0.200686 |
| MYCT1  | -0.23008 | 0.002004 | 0.006243 |
| MYC    | 0.080041 | 0.288206 | 0.397477 |
| MYD88  | 0.525587 | 4.97E-14 | 3.19E-12 |
| MYEF2  | -0.27899 | 0.000162 | 0.000724 |
| MYEOV2 | 0.119281 | 0.112772 | 0.188086 |
| MYEOV  | 0.57283  | 6.55E-17 | 8.58E-15 |
| MYF5   | -0.0464  | 0.538572 | 0.641771 |
| MYF6   | -0.1389  | 0.064449 | 0.118571 |
| MYH10  | -0.36299 | 6.37E-07 | 5.88E-06 |
| MYH11  | 0.119914 | 0.110861 | 0.185682 |
| MYH13  | 0.106552 | 0.156893 | 0.245113 |
| MYH14  | 0.550206 | 1.79E-15 | 1.53E-13 |
| MYH15  | 0.173913 | 0.020251 | 0.044888 |
| MYH16  | 0.408865 | 1.46E-08 | 2.17E-07 |
| MYH1   | -0.19904 | 0.007733 | 0.019835 |
| MYH2   | -0.05165 | 0.493517 | 0.601802 |
| MYH3   | -0.13069 | 0.082073 | 0.145253 |
| MYH4   | -0.05134 | 0.496103 | 0.603696 |
| MYH6   | -0.32105 | 1.25E-05 | 7.87E-05 |
| MYH7B  | -0.08663 | 0.250229 | 0.355795 |
| MYH7   | -0.27003 | 0.000267 | 0.00111  |
| MYH8   | -0.07337 | 0.330432 | 0.442591 |
| MYH9   | 0.12742  | 0.090087 | 0.156481 |
| MYL10  | 0.257752 | 0.000514 | 0.001945 |
| MYL12A | 0.489324 | 4.18E-12 | 1.65E-10 |
| MYL12B | 0.544747 | 3.82E-15 | 3.06E-13 |
| MYL1   | 0.075092 | 0.319153 | 0.430868 |
| MYL2   | 0.240013 | 0.001251 | 0.004171 |
| MYL3   | -0.03722 | 0.621831 | 0.715846 |
| MYL4   | 0.161239 | 0.031544 | 0.065295 |
| MYL5   | 0.158084 | 0.035073 | 0.071402 |
| MYL6B  | -0.14705 | 0.050149 | 0.09622  |
| MYL6   | 0.246195 | 0.000924 | 0.003208 |
| MYL7   | -0.23984 | 0.001262 | 0.004199 |
| MYL9   | 0.227402 | 0.002268 | 0.006958 |
| MYLIP  | -0.44923 | 3.18E-10 | 7.88E-09 |
| MYLK2  | -0.04427 | 0.557371 | 0.658627 |
| MYLK3  | -0.02462 | 0.744275 | 0.815769 |
| MYLK4  | -0.18897 | 0.011528 | 0.027878 |
| MYLK   | 0.040136 | 0.594777 | 0.692116 |
| MYLPF  | -0.01169 | 0.876924 | 0.914813 |
| MYNN   | -0.03781 | 0.61636  | 0.711121 |
| MYO10  | -0.23136 | 0.001888 | 0.005937 |
| MYO15A | 0.057316 | 0.447301 | 0.558462 |
| MYO15B | 0.180071 | 0.016163 | 0.037142 |
| MYO16  | -0.26631 | 0.000327 | 0.001319 |
| MYO18A | -0.01839 | 0.807465 | 0.863634 |
| MYO18B | -0.14842 | 0.048027 | 0.092879 |
| MYO19  | 0.428671 | 2.38E-09 | 4.50E-08 |
| MYO1A  | 0.184885 | 0.013487 | 0.031871 |
| MYO1B  | -0.43113 | 1.88E-09 | 3.66E-08 |

|         |          |          |          |
|---------|----------|----------|----------|
| MY01C   | 0.268534 | 0.00029  | 0.001193 |
| MY01D   | 0.199507 | 0.007587 | 0.019528 |
| MY01E   | 0.393785 | 5.39E-08 | 6.79E-07 |
| MY01F   | 0.058237 | 0.440018 | 0.551809 |
| MY01G   | 0.119784 | 0.111251 | 0.18624  |
| MY01H   | -0.03188 | 0.672701 | 0.759116 |
| MY03A   | -0.12319 | 0.10137  | 0.172565 |
| MY03B   | -0.1101  | 0.143448 | 0.227858 |
| MY05A   | -0.25378 | 0.00063  | 0.00231  |
| MY05B   | 0.241324 | 0.001174 | 0.003943 |
| MY05C   | 0.285166 | 0.000114 | 0.000534 |
| MY06    | 0.108946 | 0.14773  | 0.233349 |
| MY07A   | 0.147173 | 0.049951 | 0.095896 |
| MY07B   | 0.241114 | 0.001186 | 0.00398  |
| MY09A   | -0.18374 | 0.014088 | 0.033022 |
| MY09B   | 0.174393 | 0.019903 | 0.044266 |
| MYOCD   | -0.10447 | 0.165186 | 0.255345 |
| MYOC    | -0.19941 | 0.007619 | 0.019594 |
| MYOD1   | 0.046206 | 0.540239 | 0.643419 |
| MYOF    | 0.42249  | 4.24E-09 | 7.53E-08 |
| MYOG    | 0.161678 | 0.031079 | 0.064513 |
| MYOM1   | 0.139928 | 0.062478 | 0.11558  |
| MYOM2   | -0.08662 | 0.250296 | 0.355863 |
| MYOM3   | 0.375248 | 2.46E-07 | 2.57E-06 |
| MYOT    | -0.07495 | 0.320079 | 0.431882 |
| MYOZ1   | 0.000797 | 0.991579 | 0.993791 |
| MYOZ2   | -0.12115 | 0.107207 | 0.180771 |
| MYOZ3   | 0.171258 | 0.022273 | 0.048601 |
| MYPN    | 0.135816 | 0.070663 | 0.128275 |
| MYPOP   | 0.164336 | 0.02838  | 0.059732 |
| MYRIP   | -0.40562 | 1.94E-08 | 2.79E-07 |
| MYSM1   | -0.10838 | 0.14987  | 0.236194 |
| MYST1   | -0.01256 | 0.867801 | 0.908738 |
| MYST2   | -0.32663 | 8.60E-06 | 5.68E-05 |
| MYST3   | -0.20618 | 0.00576  | 0.015446 |
| MYST4   | -0.36024 | 7.85E-07 | 7.05E-06 |
| MYT1L   | -0.20145 | 0.007007 | 0.018265 |
| MYT1    | -0.35684 | 1.01E-06 | 8.77E-06 |
| MZF1    | 0.003412 | 0.963952 | 0.975596 |
| N4BP1   | 0.124175 | 0.098652 | 0.168677 |
| N4BP2L1 | 0.027286 | 0.717695 | 0.794964 |
| N4BP2L2 | 0.049491 | 0.511793 | 0.617952 |
| N4BP2   | -0.42875 | 2.36E-09 | 4.48E-08 |
| N4BP3   | 0.246313 | 0.000919 | 0.003192 |
| N6AMT1  | -0.01596 | 0.832521 | 0.881138 |
| N6AMT2  | -0.18201 | 0.015034 | 0.034913 |
| NAA10   | 0.100276 | 0.182932 | 0.276826 |
| NAA11   | 0.00161  | 0.982986 | 0.988133 |
| NAA15   | -0.05411 | 0.473153 | 0.582936 |
| NAA16   | -0.17324 | 0.020749 | 0.045785 |
| NAA20   | -0.25479 | 0.000599 | 0.002213 |
| NAA25   | -0.25128 | 0.000716 | 0.002584 |
| NAA30   | -0.35035 | 1.63E-06 | 1.33E-05 |
| NAA35   | -0.10674 | 0.15617  | 0.244293 |

|          |          |          |          |
|----------|----------|----------|----------|
| NAA38    | 0.297937 | 5.37E-05 | 0.000279 |
| NAA40    | -0.10681 | 0.155889 | 0.243949 |
| NAA50    | 0.174254 | 0.020004 | 0.044424 |
| NAAA     | -0.14902 | 0.047113 | 0.091432 |
| NAALAD2  | -0.10201 | 0.175437 | 0.267825 |
| NAALADL1 | 0.197356 | 0.008278 | 0.021024 |
| NAALADL2 | 0.260407 | 0.000447 | 0.001728 |
| NAB1     | 0.3117   | 2.28E-05 | 0.000132 |
| NAB2     | 0.036293 | 0.630548 | 0.722935 |
| NACA2    | 0.109592 | 0.145328 | 0.230303 |
| NACAD    | -0.1603  | 0.032565 | 0.067078 |
| NACAP1   | 0.139917 | 0.062498 | 0.115607 |
| NACA     | 0.121294 | 0.106784 | 0.180228 |
| NACC1    | 0.280742 | 0.000147 | 0.000665 |
| NACC2    | -0.14321 | 0.056513 | 0.106297 |
| NADK     | 0.105475 | 0.16115  | 0.2503   |
| NADSYN1  | 0.421231 | 4.77E-09 | 8.31E-08 |
| NAE1     | -0.09675 | 0.198878 | 0.296466 |
| NAF1     | -0.28203 | 0.000137 | 0.000626 |
| NAGA     | 0.109082 | 0.147224 | 0.232733 |
| NAGK     | 0.0103   | 0.891459 | 0.924369 |
| NAGLU    | -0.09515 | 0.206442 | 0.305667 |
| NAGPA    | 0.019057 | 0.800664 | 0.859752 |
| NAGS     | 0.548309 | 2.33E-15 | 1.93E-13 |
| NAIF1    | 0.097293 | 0.196365 | 0.293317 |
| NAIP     | -0.21858 | 0.003377 | 0.009763 |
| NALCN    | -0.1661  | 0.026704 | 0.056754 |
| NAMPT    | 0.098639 | 0.190218 | 0.285797 |
| NANOG    | 0.063847 | 0.397166 | 0.509873 |
| NANOS1   | -0.34491 | 2.42E-06 | 1.88E-05 |
| NANOS2   | -0.03384 | 0.653884 | 0.742969 |
| NANOS3   | 0.133499 | 0.075648 | 0.135741 |
| NANP     | -0.24712 | 0.000882 | 0.00309  |
| NANS     | 0.271835 | 0.000242 | 0.001018 |
| NAP1L1   | -0.2441  | 0.001025 | 0.003505 |
| NAP1L2   | -0.39372 | 5.42E-08 | 6.83E-07 |
| NAP1L3   | -0.28419 | 0.000121 | 0.000561 |
| NAP1L4   | 0.240785 | 0.001205 | 0.004033 |
| NAP1L5   | -0.41711 | 6.96E-09 | 1.16E-07 |
| NAP1L6   | -0.24868 | 0.000816 | 0.002895 |
| NAPA     | -0.07277 | 0.334392 | 0.446593 |
| NAPB     | -0.36068 | 7.59E-07 | 6.86E-06 |
| NAPEPLD  | 0.148542 | 0.047835 | 0.092589 |
| NAPG     | 0.155474 | 0.038239 | 0.076723 |
| NAPRT1   | 0.506213 | 5.66E-13 | 2.78E-11 |
| NAPSA    | -0.02344 | 0.756099 | 0.825358 |
| NAPSB    | 0.148025 | 0.048626 | 0.09378  |
| NARFL    | 0.20486  | 0.006087 | 0.016171 |
| NARF     | 0.070837 | 0.347418 | 0.459891 |
| NARG2    | -0.32206 | 1.17E-05 | 7.43E-05 |
| NARS2    | -0.29022 | 8.51E-05 | 0.000413 |
| NARS     | -0.38888 | 8.12E-08 | 9.75E-07 |
| NASP     | 0.213596 | 0.0042   | 0.011799 |
| NAT10    | 0.17952  | 0.016497 | 0.03777  |

|           |          |          |          |
|-----------|----------|----------|----------|
| NAT14     | -0.05242 | 0.487112 | 0.595939 |
| NAT15     | -0.00866 | 0.908711 | 0.936122 |
| NAT1      | 0.224574 | 0.002581 | 0.007768 |
| NAT2      | 0.197021 | 0.00839  | 0.021273 |
| NAT6      | 0.186609 | 0.012628 | 0.030144 |
| NAT8B     | 0.033376 | 0.658292 | 0.746819 |
| NAT8L     | -0.29518 | 6.34E-05 | 0.00032  |
| NAT8      | -0.11711 | 0.119516 | 0.196779 |
| NAT9      | 0.058866 | 0.43509  | 0.546599 |
| NAV1      | 0.021041 | 0.780419 | 0.843877 |
| NAV2      | 0.049348 | 0.513016 | 0.619202 |
| NAV3      | -0.01075 | 0.88678  | 0.92116  |
| NBAS      | -0.24764 | 0.00086  | 0.003021 |
| NBEAL1    | -0.03959 | 0.599834 | 0.696484 |
| NBEAL2    | 0.302023 | 4.18E-05 | 0.000225 |
| NBEA      | -0.38409 | 1.20E-07 | 1.37E-06 |
| NBL1      | 0.370721 | 3.51E-07 | 3.50E-06 |
| NBLA00301 | 0.066707 | 0.376317 | 0.489173 |
| NBN       | -0.16885 | 0.024251 | 0.052266 |
| NBPF10    | 0.008644 | 0.908833 | 0.936198 |
| NBPF14    | -0.07752 | 0.303715 | 0.414127 |
| NBPF15    | 0.226706 | 0.002342 | 0.007146 |
| NBPF16    | 0.058215 | 0.440195 | 0.551995 |
| NBPF1     | -0.33328 | 5.47E-06 | 3.85E-05 |
| NBPF22P   | 0.124467 | 0.097854 | 0.167646 |
| NBPF3     | -0.31398 | 1.97E-05 | 0.000117 |
| NBPF4     | 0.030037 | 0.690627 | 0.773649 |
| NBPF6     | 0.021854 | 0.772156 | 0.837692 |
| NBPF7     | -0.13403 | 0.074488 | 0.133927 |
| NBPF9     | -0.10545 | 0.161252 | 0.250435 |
| NBR1      | -0.00506 | 0.946562 | 0.963933 |
| NBR2      | 0.156719 | 0.036699 | 0.074171 |
| NCALD     | -0.48639 | 5.85E-12 | 2.25E-10 |
| NCAM1     | -0.38733 | 9.23E-08 | 1.09E-06 |
| NCAM2     | -0.11659 | 0.121186 | 0.198783 |
| NCAN      | -0.1774  | 0.017839 | 0.040327 |
| NCAPD2    | -0.11487 | 0.126793 | 0.206273 |
| NCAPD3    | -0.07076 | 0.34795  | 0.460379 |
| NCAPG2    | 0.061231 | 0.416833 | 0.529279 |
| NCAPG     | 0.356045 | 1.07E-06 | 9.25E-06 |
| NCAPH2    | 0.10453  | 0.164959 | 0.255174 |
| NCAPH     | 0.327799 | 7.95E-06 | 5.30E-05 |
| NCBP1     | -0.23917 | 0.001304 | 0.004315 |
| NCBP2     | 0.098986 | 0.188658 | 0.283924 |
| NCCRP1    | 0.132922 | 0.076932 | 0.137584 |
| NCDN      | -0.32249 | 1.13E-05 | 7.25E-05 |
| NCEH1     | 0.231893 | 0.001842 | 0.005811 |
| NCF1B     | 0.025726 | 0.733201 | 0.807077 |
| NCF1C     | 0.01597  | 0.832441 | 0.881138 |
| NCF1      | 0.066344 | 0.378931 | 0.491569 |
| NCF2      | 0.279966 | 0.000154 | 0.000692 |
| NCF4      | 0.13524  | 0.071878 | 0.130122 |
| NCK1      | 0.289702 | 8.77E-05 | 0.000424 |
| NCK2      | 0.173321 | 0.020688 | 0.045676 |

|           |          |          |          |
|-----------|----------|----------|----------|
| NCKAP1L   | -0.00506 | 0.946579 | 0.963933 |
| NCKAP1    | 0.033454 | 0.657536 | 0.746091 |
| NCKAP5L   | -0.04676 | 0.535347 | 0.639005 |
| NCKAP5    | -0.14343 | 0.05614  | 0.105786 |
| NCKIPSD   | 0.038041 | 0.614167 | 0.709405 |
| NCLN      | 0.144732 | 0.053915 | 0.102266 |
| NCL       | 0.097451 | 0.195635 | 0.29247  |
| NCOA1     | -0.36111 | 7.35E-07 | 6.67E-06 |
| NCOA2     | -0.1649  | 0.027836 | 0.058756 |
| NCOA3     | -0.12672 | 0.091892 | 0.159112 |
| NCOA4     | -0.10525 | 0.162068 | 0.251508 |
| NCOA5     | -0.49529 | 2.09E-12 | 9.00E-11 |
| NCOA6     | -0.18108 | 0.015568 | 0.035934 |
| NCOA7     | -0.10502 | 0.162966 | 0.252586 |
| NCOR1     | -0.28635 | 0.000107 | 0.000502 |
| NCOR2     | -0.01031 | 0.891367 | 0.924369 |
| NCR1      | -0.21343 | 0.00423  | 0.011865 |
| NCR2      | 0.015703 | 0.835199 | 0.883308 |
| NCR3      | -0.05836 | 0.439027 | 0.550776 |
| NCRNA0002 | -0.19106 | 0.010628 | 0.026022 |
| NCRNA0002 | 0.010085 | 0.89371  | 0.925926 |
| NCRNA0003 | 0.047517 | 0.528799 | 0.633534 |
| NCRNA0005 | 0.017086 | 0.820919 | 0.873256 |
| NCRNA0005 | -0.02889 | 0.701865 | 0.782382 |
| NCRNA0008 | -0.325   | 9.59E-06 | 6.26E-05 |
| NCRNA0008 | 0.133631 | 0.075356 | 0.135328 |
| NCRNA0008 | -0.31505 | 1.84E-05 | 0.00011  |
| NCRNA0008 | -0.09005 | 0.231938 | 0.335504 |
| NCRNA0009 | -0.07745 | 0.304121 | 0.414509 |
| NCRNA0009 | 0.378079 | 1.96E-07 | 2.11E-06 |
| NCRNA0009 | -0.32076 | 1.27E-05 | 7.99E-05 |
| NCRNA0009 | 0.043853 | 0.561084 | 0.662064 |
| NCRNA0010 | 0.155185 | 0.038604 | 0.077333 |
| NCRNA0010 | 0.041088 | 0.586059 | 0.684589 |
| NCRNA0011 | -0.02883 | 0.702424 | 0.782829 |
| NCRNA0011 | 0.168003 | 0.024987 | 0.053618 |
| NCRNA0011 | -0.00219 | 0.976887 | 0.984084 |
| NCRNA0011 | 0.192897 | 0.009888 | 0.02446  |
| NCRNA0011 | -0.20099 | 0.007141 | 0.018519 |
| NCRNA0011 | 0.158363 | 0.034748 | 0.070829 |
| NCRNA0011 | 0.239932 | 0.001256 | 0.004186 |
| NCRNA0011 | -0.05414 | 0.472917 | 0.582755 |
| NCRNA0012 | -0.02267 | 0.763915 | 0.831809 |
| NCRNA0015 | 0.409079 | 1.43E-08 | 2.14E-07 |
| NCRNA0015 | -0.32101 | 1.25E-05 | 7.88E-05 |
| NCRNA0015 | 0.015463 | 0.837683 | 0.88551  |
| NCRNA0016 | 0.179083 | 0.016766 | 0.038274 |
| NCRNA0016 | -0.06393 | 0.396521 | 0.509275 |
| NCRNA0016 | 0.139797 | 0.062726 | 0.115909 |
| NCRNA0016 | -0.06425 | 0.394213 | 0.506969 |
| NCRNA0016 | -0.25794 | 0.000509 | 0.001929 |
| NCRNA0016 | 0.248652 | 0.000818 | 0.002898 |
| NCRNA0017 | -0.29101 | 8.12E-05 | 0.000397 |
| NCRNA0017 | -0.14514 | 0.053238 | 0.101166 |

|           |          |          |          |
|-----------|----------|----------|----------|
| NCRNA0017 | 0.048816 | 0.517576 | 0.623412 |
| NCRNA0017 | -0.08303 | 0.270503 | 0.378266 |
| NCRNA0017 | 0.02125  | 0.778291 | 0.842612 |
| NCRNA001E | -0.21899 | 0.003315 | 0.00961  |
| NCRNA001E | -0.11243 | 0.135136 | 0.217392 |
| NCRNA001E | 0.030007 | 0.690913 | 0.77368  |
| NCRNA001E | -0.0698  | 0.354509 | 0.467462 |
| NCRNA001E | -0.09676 | 0.198824 | 0.296407 |
| NCRNA001E | 0.032688 | 0.664898 | 0.752673 |
| NCRNA002C | 0.000157 | 0.998337 | 0.99859  |
| NCRNA002C | 0.310621 | 2.44E-05 | 0.000141 |
| NCRNA002C | -0.10514 | 0.162511 | 0.25202  |
| NCRNA002C | 0.146467 | 0.051071 | 0.097724 |
| NCRNA002C | 0.081456 | 0.279741 | 0.388155 |
| NCRNA002C | -0.01467 | 0.845936 | 0.891422 |
| NCRNA002I | 0.008244 | 0.913028 | 0.939296 |
| NCRNA002E | -0.01359 | 0.857167 | 0.900474 |
| NCRNA002E | -0.19933 | 0.007642 | 0.019644 |
| NCS1      | -0.18188 | 0.015105 | 0.03506  |
| NCSTN     | -0.07796 | 0.300989 | 0.411146 |
| NDC80     | 0.326096 | 8.91E-06 | 5.87E-05 |
| NDE1      | 0.3482   | 1.91E-06 | 1.52E-05 |
| NDEL1     | -0.19639 | 0.008605 | 0.021718 |
| NDFIP1    | -0.22799 | 0.002208 | 0.006794 |
| NDFIP2    | 0.259722 | 0.000464 | 0.001778 |
| NDNL2     | -0.25513 | 0.000588 | 0.002184 |
| NDN       | -0.09165 | 0.223694 | 0.325892 |
| NDOR1     | 0.272042 | 0.000239 | 0.001009 |
| NDP       | 0.269104 | 0.000281 | 0.00116  |
| NDRG1     | -0.03623 | 0.63118  | 0.723449 |
| NDRG2     | 0.013156 | 0.861636 | 0.90392  |
| NDRG3     | -0.2564  | 0.000551 | 0.002065 |
| NDRG4     | -0.20433 | 0.006223 | 0.016494 |
| NDST1     | -0.45799 | 1.29E-10 | 3.55E-09 |
| NDST2     | -0.3778  | 2.00E-07 | 2.15E-06 |
| NDST3     | -0.11026 | 0.142863 | 0.22718  |
| NDST4     | -0.2517  | 0.000701 | 0.002535 |
| NDUFA10   | 0.17509  | 0.019407 | 0.043274 |
| NDUFA11   | 0.11092  | 0.140487 | 0.224176 |
| NDUFA12   | 0.122887 | 0.102223 | 0.173779 |
| NDUFA13   | 0.091588 | 0.224027 | 0.326208 |
| NDUFA1    | 0.025598 | 0.734482 | 0.808126 |
| NDUFA2    | 0.082501 | 0.273598 | 0.381694 |
| NDUFA3    | 0.027589 | 0.714697 | 0.792416 |
| NDUFA4L2  | 0.017278 | 0.818939 | 0.871707 |
| NDUFA4    | 0.283401 | 0.000126 | 0.000583 |
| NDUFA5    | -0.29872 | 5.12E-05 | 0.000268 |
| NDUFA6    | 0.016868 | 0.82316  | 0.874751 |
| NDUFA7    | 0.078909 | 0.295104 | 0.40497  |
| NDUFA8    | -0.05047 | 0.503437 | 0.610547 |
| NDUFA9    | -0.10175 | 0.176536 | 0.269054 |
| NDUFAB1   | 0.111862 | 0.137126 | 0.219841 |
| NDUFAB1   | 0.054152 | 0.472813 | 0.582663 |
| NDUFAB2   | -0.00081 | 0.991421 | 0.993683 |

|         |          |          |          |
|---------|----------|----------|----------|
| NDUFAF3 | 0.135017 | 0.072352 | 0.130787 |
| NDUFAF4 | -0.19069 | 0.010784 | 0.026353 |
| NDUFB10 | 0.157225 | 0.036089 | 0.073133 |
| NDUFB11 | 0.012892 | 0.864382 | 0.905973 |
| NDUFB1  | 0.017807 | 0.81349  | 0.867869 |
| NDUFB2  | -0.04405 | 0.559298 | 0.660312 |
| NDUFB3  | 0.291487 | 7.89E-05 | 0.000387 |
| NDUFB4  | 0.23899  | 0.001315 | 0.004345 |
| NDUFB5  | 0.12774  | 0.089278 | 0.155349 |
| NDUFB6  | -0.07806 | 0.300316 | 0.410482 |
| NDUFB7  | 0.173256 | 0.020736 | 0.045768 |
| NDUFB8  | 0.000337 | 0.996441 | 0.997472 |
| NDUFB9  | 0.111372 | 0.138865 | 0.22208  |
| NDUFC1  | 0.014704 | 0.845544 | 0.891092 |
| NDUFC2  | 0.165131 | 0.027613 | 0.058354 |
| NDUFS1  | 0.016279 | 0.829243 | 0.879267 |
| NDUFS2  | 0.192111 | 0.010199 | 0.02511  |
| NDUFS3  | 0.204305 | 0.006229 | 0.016509 |
| NDUFS4  | 0.091663 | 0.223648 | 0.325849 |
| NDUFS5  | 0.121267 | 0.106862 | 0.180313 |
| NDUFS6  | 0.049607 | 0.510804 | 0.617134 |
| NDUFS7  | 0.060813 | 0.420025 | 0.532135 |
| NDUFS8  | 0.212597 | 0.004385 | 0.012221 |
| NDUFV1  | 0.161468 | 0.031301 | 0.064894 |
| NDUFV2  | 0.149062 | 0.047052 | 0.091342 |
| NDUFV3  | -0.06208 | 0.41037  | 0.522413 |
| NEAT1   | 0.373836 | 2.75E-07 | 2.82E-06 |
| NEBL    | 0.005423 | 0.942726 | 0.961528 |
| NEB     | -0.06667 | 0.376559 | 0.489366 |
| NECAB1  | -0.07952 | 0.291382 | 0.401015 |
| NECAB2  | -0.16203 | 0.030706 | 0.063921 |
| NECAB3  | -0.12776 | 0.089216 | 0.155303 |
| NECAP1  | -0.36662 | 4.82E-07 | 4.60E-06 |
| NECAP2  | 0.3269   | 8.44E-06 | 5.59E-05 |
| NEDD1   | -0.16636 | 0.026462 | 0.056313 |
| NEDD4L  | -0.1425  | 0.057765 | 0.108198 |
| NEDD4   | 0.009451 | 0.900362 | 0.930486 |
| NEDD8   | 0.218243 | 0.003427 | 0.009893 |
| NEDD9   | -0.13347 | 0.075712 | 0.135831 |
| NEFH    | -0.04468 | 0.553703 | 0.655506 |
| NEFL    | -0.26458 | 0.000358 | 0.001432 |
| NEFM    | -0.22133 | 0.002987 | 0.008821 |
| NEGR1   | -0.25418 | 0.000618 | 0.002271 |
| NEIL1   | 0.162304 | 0.030424 | 0.063421 |
| NEIL2   | -0.13326 | 0.076185 | 0.136506 |
| NEIL3   | 0.195773 | 0.008821 | 0.022177 |
| NEK10   | -0.27552 | 0.000197 | 0.000857 |
| NEK11   | -0.0115  | 0.8789   | 0.916054 |
| NEK1    | -0.32381 | 1.04E-05 | 6.72E-05 |
| NEK2    | 0.374528 | 2.60E-07 | 2.70E-06 |
| NEK3    | 0.192056 | 0.010221 | 0.025155 |
| NEK4    | -0.3053  | 3.41E-05 | 0.000189 |
| NEK5    | -0.12349 | 0.100528 | 0.171312 |
| NEK6    | 0.229899 | 0.002021 | 0.006291 |

|          |          |          |          |
|----------|----------|----------|----------|
| NEK7     | 0.248425 | 0.000827 | 0.002923 |
| NEK8     | 0.063418 | 0.400355 | 0.512934 |
| NEK9     | -0.34246 | 2.88E-06 | 2.20E-05 |
| NELF     | 0.110623 | 0.14156  | 0.225557 |
| NELL1    | -0.18693 | 0.012475 | 0.029838 |
| NELL2    | -0.15139 | 0.043681 | 0.085902 |
| NENF     | -0.08976 | 0.233429 | 0.337327 |
| NEO1     | -0.20116 | 0.007093 | 0.018425 |
| NES      | -0.10898 | 0.14762  | 0.233243 |
| NET1     | 0.495226 | 2.11E-12 | 9.05E-11 |
| NETO1    | 0.030602 | 0.685115 | 0.769349 |
| NETO2    | -0.29209 | 7.62E-05 | 0.000375 |
| NEU1     | -0.27169 | 0.000244 | 0.001025 |
| NEU2     | 0.17735  | 0.017871 | 0.040387 |
| NEU3     | -0.23933 | 0.001294 | 0.004291 |
| NEU4     | -0.09105 | 0.226785 | 0.329386 |
| NEURL1B  | -0.18247 | 0.014779 | 0.034426 |
| NEURL2   | -0.11377 | 0.130518 | 0.211165 |
| NEURL3   | 0.17084  | 0.022606 | 0.049215 |
| NEURL4   | -0.42316 | 3.99E-09 | 7.14E-08 |
| NEURL    | -0.35357 | 1.29E-06 | 1.08E-05 |
| NEUROD1  | -0.17934 | 0.016606 | 0.037982 |
| NEUROD2  | -0.09012 | 0.231552 | 0.335092 |
| NEUROD4  | -0.29717 | 5.62E-05 | 0.000289 |
| NEUROG2  | -0.0629  | 0.404236 | 0.516835 |
| NEUROG3  | -0.0416  | 0.581393 | 0.680103 |
| NEXN     | -0.05276 | 0.484278 | 0.593278 |
| NF1P1    | -0.04057 | 0.590815 | 0.688518 |
| NF1      | -0.10752 | 0.153148 | 0.240432 |
| NF2      | -0.3544  | 1.21E-06 | 1.03E-05 |
| NFAM1    | -0.05122 | 0.49718  | 0.604702 |
| NFASC    | -0.44879 | 3.33E-10 | 8.18E-09 |
| NFAT5    | 0.011452 | 0.879406 | 0.916291 |
| NFATC1   | -0.19641 | 0.008598 | 0.021701 |
| NFATC2IP | 0.275739 | 0.000195 | 0.000847 |
| NFATC2   | -0.33801 | 3.94E-06 | 2.88E-05 |
| NFATC3   | -0.1285  | 0.087366 | 0.152789 |
| NFATC4   | 0.130027 | 0.083646 | 0.147443 |
| NFE2L1   | -0.24208 | 0.001132 | 0.003824 |
| NFE2L2   | 0.158314 | 0.034805 | 0.070909 |
| NFE2L3   | 0.394073 | 5.26E-08 | 6.65E-07 |
| NFE2     | 0.219649 | 0.00322  | 0.009383 |
| NFIA     | 0.001292 | 0.986347 | 0.990354 |
| NFIB     | -0.01457 | 0.846934 | 0.892379 |
| NFIC     | -0.23922 | 0.0013   | 0.004307 |
| NFIL3    | -0.08969 | 0.233828 | 0.337794 |
| NFIX     | 0.008925 | 0.905883 | 0.934376 |
| NFKB1    | -0.05652 | 0.453615 | 0.564492 |
| NFKB2    | 0.375064 | 2.49E-07 | 2.60E-06 |
| NFKBIA   | 0.022653 | 0.764073 | 0.831919 |
| NFKBIB   | 0.348602 | 1.86E-06 | 1.49E-05 |
| NFKBID   | 0.083589 | 0.267298 | 0.374915 |
| NFKBIE   | 0.358745 | 8.78E-07 | 7.75E-06 |
| NFKBIL1  | 0.099426 | 0.186691 | 0.281482 |



|           |          |          |          |
|-----------|----------|----------|----------|
| NFKBIL2   | 0.322898 | 1.10E-05 | 7.08E-05 |
| NFKBIZ    | 0.155074 | 0.038745 | 0.07756  |
| NFRKB     | 0.147608 | 0.04927  | 0.094847 |
| NFS1      | -0.14032 | 0.061738 | 0.114372 |
| NFU1      | -0.11506 | 0.126175 | 0.205534 |
| NFX1      | -0.19618 | 0.00868  | 0.021878 |
| NFXL1     | -0.26636 | 0.000326 | 0.001316 |
| NFYA      | 0.090337 | 0.230446 | 0.333834 |
| NFYB      | -0.29221 | 7.56E-05 | 0.000373 |
| NFYC      | -0.13805 | 0.066121 | 0.121265 |
| NGB       | -0.09242 | 0.219839 | 0.321578 |
| NGDN      | -0.03023 | 0.688698 | 0.771969 |
| NGEF      | 0.553678 | 1.09E-15 | 1.00E-13 |
| NGFRAP1   | -0.29811 | 5.31E-05 | 0.000276 |
| NGFR      | -0.11242 | 0.135171 | 0.21743  |
| NGF       | -0.06305 | 0.403088 | 0.515734 |
| NGLY1     | 0.011724 | 0.876571 | 0.914571 |
| NGRN      | -0.00774 | 0.918291 | 0.94329  |
| NHEDC1    | -0.30619 | 3.23E-05 | 0.00018  |
| NHEDC2    | 0.37862  | 1.88E-07 | 2.03E-06 |
| NHEG1     | -0.24707 | 0.000885 | 0.003097 |
| NHEJ1     | 0.247237 | 0.000877 | 0.003074 |
| NHLH1     | 0.142955 | 0.05696  | 0.106959 |
| NHLH2     | -0.14173 | 0.059149 | 0.110273 |
| NHLRC1    | -0.11014 | 0.143305 | 0.227681 |
| NHLRC2    | -0.15953 | 0.033419 | 0.068594 |
| NHLRC3    | 0.043814 | 0.561435 | 0.662399 |
| NHLRC4    | 0.023151 | 0.759043 | 0.827988 |
| NHP2L1    | 0.00778  | 0.91791  | 0.943044 |
| NHP2      | 0.174274 | 0.019989 | 0.044396 |
| NHSL1     | -0.07334 | 0.330629 | 0.442734 |
| NHSL2     | -0.30407 | 3.69E-05 | 0.000201 |
| NHS       | 0.325881 | 9.04E-06 | 5.94E-05 |
| NICN1     | -0.10358 | 0.168839 | 0.259957 |
| NID1      | -0.05241 | 0.487228 | 0.596007 |
| NID2      | -0.01954 | 0.795684 | 0.855752 |
| NIF3L1    | 0.199071 | 0.007723 | 0.019818 |
| NINJ1     | 0.075476 | 0.316678 | 0.428053 |
| NINJ2     | 0.325019 | 9.58E-06 | 6.26E-05 |
| NINL      | -0.08501 | 0.259233 | 0.3656   |
| NIN       | -0.19572 | 0.008838 | 0.022207 |
| NIP7      | 0.332785 | 5.66E-06 | 3.97E-05 |
| NIPA1     | 0.114274 | 0.128801 | 0.208952 |
| NIPA2     | 0.2549   | 0.000595 | 0.002205 |
| NIPAL1    | 0.100947 | 0.180005 | 0.273359 |
| NIPAL2    | -0.00479 | 0.949379 | 0.96574  |
| NIPAL3    | -0.18066 | 0.015812 | 0.036434 |
| NIPAL4    | 0.218878 | 0.003332 | 0.009654 |
| NIPBL     | -0.36117 | 7.31E-07 | 6.64E-06 |
| NIPSNAP1  | -0.09444 | 0.209885 | 0.309879 |
| NIPSNAP3A | 0.020477 | 0.78616  | 0.848525 |
| NIPSNAP3E | -0.29536 | 6.27E-05 | 0.000318 |
| NISCH     | -0.17746 | 0.017797 | 0.040242 |
| NIT1      | 0.27907  | 0.000162 | 0.000722 |

|         |          |          |          |
|---------|----------|----------|----------|
| NIT2    | 0.282163 | 0.000136 | 0.000621 |
| NKAIN1  | -0.197   | 0.008396 | 0.021283 |
| NKAIN2  | -0.27645 | 0.000187 | 0.000818 |
| NKAIN3  | 0.133253 | 0.076195 | 0.136512 |
| NKAIN4  | 0.45275  | 2.22E-10 | 5.66E-09 |
| NKAPL   | -0.23092 | 0.001927 | 0.006042 |
| NKAP    | -0.06398 | 0.396203 | 0.508984 |
| NKD1    | 0.286901 | 0.000103 | 0.000489 |
| NKD2    | 0.296312 | 5.92E-05 | 0.000303 |
| NKG7    | -0.07079 | 0.347751 | 0.460208 |
| NKIRAS1 | -0.36837 | 4.21E-07 | 4.09E-06 |
| NKIRAS2 | 0.356347 | 1.05E-06 | 9.07E-06 |
| NKPD1   | 0.039211 | 0.603307 | 0.699449 |
| NKRF    | -0.22118 | 0.003007 | 0.008871 |
| NKTR    | 0.042465 | 0.573562 | 0.673173 |
| NKX1-2  | -0.10054 | 0.181782 | 0.275488 |
| NKX2-1  | 0.076008 | 0.313271 | 0.424144 |
| NKX2-2  | -0.25941 | 0.000471 | 0.001804 |
| NKX2-3  | -0.0607  | 0.420855 | 0.533016 |
| NKX2-4  | -0.23991 | 0.001257 | 0.004189 |
| NKX2-5  | 0.0593   | 0.431703 | 0.543622 |
| NKX2-6  | -0.0761  | 0.312683 | 0.423637 |
| NKX2-8  | 0.223897 | 0.002662 | 0.007969 |
| NKX3-1  | 0.222933 | 0.00278  | 0.008279 |
| NKX3-2  | 0.374932 | 2.52E-07 | 2.63E-06 |
| NKX6-1  | -0.17152 | 0.022068 | 0.048198 |
| NKX6-2  | 0.152841 | 0.041674 | 0.082513 |
| NKX6-3  | -0.09583 | 0.20323  | 0.301883 |
| NLE1    | 0.048338 | 0.521688 | 0.627218 |
| NLGN1   | -0.31164 | 2.29E-05 | 0.000133 |
| NLGN2   | -0.12522 | 0.095835 | 0.164686 |
| NLGN3   | 0.057727 | 0.444042 | 0.555735 |
| NLGN4X  | -0.3286  | 7.53E-06 | 5.07E-05 |
| NLGN4Y  | -0.10316 | 0.170616 | 0.262142 |
| NLK     | -0.41687 | 7.11E-09 | 1.18E-07 |
| NLN     | 0.082791 | 0.271907 | 0.379871 |
| NLRC3   | -0.20207 | 0.006831 | 0.017877 |
| NLRC4   | -0.06094 | 0.419078 | 0.53131  |
| NLRC5   | 0.146798 | 0.050544 | 0.096837 |
| NLRP10  | 0.081892 | 0.277167 | 0.385185 |
| NLRP11  | -0.18599 | 0.012929 | 0.030731 |
| NLRP12  | 0.143791 | 0.055511 | 0.10477  |
| NLRP13  | 0.077491 | 0.303894 | 0.414284 |
| NLRP14  | -0.13644 | 0.069376 | 0.126273 |
| NLRP1   | 0.187826 | 0.012051 | 0.028983 |
| NLRP2   | 0.220873 | 0.003049 | 0.008962 |
| NLRP3   | -0.0257  | 0.733425 | 0.807278 |
| NLRP4   | -0.12428 | 0.09837  | 0.168282 |
| NLRP5   | -0.12268 | 0.102802 | 0.17461  |
| NLRP6   | 0.015989 | 0.832243 | 0.881125 |
| NLRP7   | 0.124322 | 0.098251 | 0.168124 |
| NLRP8   | -0.04434 | 0.556708 | 0.658039 |
| NLRP9   | -0.05759 | 0.445138 | 0.55657  |
| NLRX1   | 0.237518 | 0.001411 | 0.004621 |

|           |          |          |          |
|-----------|----------|----------|----------|
| NMBR      | -0.14613 | 0.051618 | 0.098637 |
| NMB       | 0.338685 | 3.76E-06 | 2.77E-05 |
| NMD3      | 0.10243  | 0.173659 | 0.265846 |
| NME1-NME2 | 0.224463 | 0.002594 | 0.007799 |
| NME1      | 0.221179 | 0.003008 | 0.008871 |
| NME2P1    | 0.193235 | 0.009757 | 0.024181 |
| NME2      | 0.404091 | 2.22E-08 | 3.15E-07 |
| NME3      | 0.159486 | 0.033466 | 0.068667 |
| NME4      | 0.101982 | 0.17556  | 0.267952 |
| NME5      | -0.26348 | 0.00038  | 0.001503 |
| NME6      | 0.13277  | 0.077275 | 0.138121 |
| NME7      | 0.022642 | 0.764184 | 0.831919 |
| NMI       | 0.413578 | 9.58E-09 | 1.52E-07 |
| NMNAT1    | -0.22552 | 0.002472 | 0.007485 |
| NMNAT2    | -0.11514 | 0.125903 | 0.20516  |
| NMNAT3    | -0.25113 | 0.000722 | 0.0026   |
| NMRAL1    | 0.294279 | 6.69E-05 | 0.000336 |
| NMT1      | -0.08024 | 0.287035 | 0.396191 |
| NMT2      | -0.02578 | 0.732657 | 0.806657 |
| NMUR1     | -0.05401 | 0.473999 | 0.583797 |
| NMUR2     | 0.253373 | 0.000644 | 0.002352 |
| NMU       | 0.658735 | 1.62E-23 | 1.28E-20 |
| NNAT      | 0.019895 | 0.792096 | 0.852845 |
| NNMT      | 0.237874 | 0.001387 | 0.004554 |
| NNT       | -0.12874 | 0.086787 | 0.151977 |
| NOB1      | 0.327174 | 8.29E-06 | 5.51E-05 |
| NOC2L     | 0.078017 | 0.300613 | 0.410745 |
| NOC3L     | 0.062387 | 0.408077 | 0.520299 |
| NOC4L     | 0.132778 | 0.077256 | 0.138112 |
| NOD1      | 0.217528 | 0.003537 | 0.010161 |
| NOD2      | 0.398331 | 3.66E-08 | 4.82E-07 |
| NODAL     | 0.277221 | 0.00018  | 0.000789 |
| NOG       | 0.400445 | 3.05E-08 | 4.12E-07 |
| NOL10     | 0.212928 | 0.004323 | 0.012078 |
| NOL11     | -0.20453 | 0.00617  | 0.016376 |
| NOL12     | 0.170759 | 0.022671 | 0.049324 |
| NOL3      | 0.303359 | 3.85E-05 | 0.000209 |
| NOL4      | -0.26587 | 0.000335 | 0.001346 |
| NOL6      | -0.08004 | 0.288228 | 0.397477 |
| NOL7      | 0.015971 | 0.832429 | 0.881138 |
| NOL8      | -0.17977 | 0.016345 | 0.037491 |
| NOL9      | -0.2974  | 5.54E-05 | 0.000286 |
| NOLC1     | -0.05548 | 0.462046 | 0.572287 |
| NOM1      | -0.13462 | 0.073206 | 0.132007 |
| NOMO1     | -0.32532 | 9.38E-06 | 6.14E-05 |
| NOMO2     | -0.2467  | 0.000901 | 0.003142 |
| NOMO3     | -0.20279 | 0.006632 | 0.017437 |
| NONO      | -0.21915 | 0.003293 | 0.009551 |
| NOP10     | 0.437537 | 1.02E-09 | 2.15E-08 |
| NOP14     | -0.1154  | 0.125059 | 0.204053 |
| NOP16     | 0.327971 | 7.85E-06 | 5.25E-05 |
| NOP2      | -0.01843 | 0.807096 | 0.863342 |
| NOP56     | -0.20521 | 0.005999 | 0.015979 |
| NOP58     | 0.263935 | 0.000371 | 0.001474 |

|          |          |          |          |
|----------|----------|----------|----------|
| NOS1AP   | -0.10357 | 0.168882 | 0.259982 |
| NOS1     | -0.28597 | 0.000109 | 0.000512 |
| NOS2     | -0.11178 | 0.137428 | 0.220255 |
| NOS3     | 0.016185 | 0.830209 | 0.879698 |
| NOSIP    | 0.171778 | 0.021864 | 0.047814 |
| NOSTRIN  | 0.097781 | 0.194121 | 0.290667 |
| NOTCH1   | -0.05899 | 0.434134 | 0.545675 |
| NOTCH2NL | 0.433104 | 1.56E-09 | 3.10E-08 |
| NOTCH2   | 0.213953 | 0.004135 | 0.011648 |
| NOTCH3   | 0.201044 | 0.007126 | 0.01849  |
| NOTCH4   | -0.2153  | 0.0039   | 0.011073 |
| NOTO     | -0.06353 | 0.399527 | 0.512039 |
| NOTUM    | 0.14053  | 0.061347 | 0.113743 |
| NOVA1    | -0.33488 | 4.90E-06 | 3.50E-05 |
| NOVA2    | -0.2648  | 0.000354 | 0.001418 |
| NOV      | -0.05759 | 0.445132 | 0.55657  |
| NOX1     | 0.102015 | 0.175419 | 0.267825 |
| NOX4     | 0.29953  | 4.87E-05 | 0.000257 |
| NOX5     | -0.07368 | 0.328385 | 0.440325 |
| NOXA1    | 0.263931 | 0.000371 | 0.001474 |
| NOXO1    | 0.249727 | 0.000775 | 0.002769 |
| NPAS1    | 0.314977 | 1.85E-05 | 0.000111 |
| NPAS2    | 0.42246  | 4.26E-09 | 7.53E-08 |
| NPAS3    | -0.49779 | 1.56E-12 | 6.91E-11 |
| NPAS4    | -0.16844 | 0.024605 | 0.052942 |
| NPAT     | -0.14493 | 0.053584 | 0.101715 |
| NPBWR1   | 0.109853 | 0.144368 | 0.229039 |
| NPBWR2   | -0.09913 | 0.187994 | 0.283079 |
| NPB      | 0.245116 | 0.000975 | 0.00336  |
| NPC1L1   | 0.134118 | 0.07429  | 0.133668 |
| NPC1     | 0.136431 | 0.069386 | 0.12628  |
| NPC2     | 0.143966 | 0.055212 | 0.104334 |
| NPDC1    | 0.008326 | 0.912174 | 0.938564 |
| NPEPL1   | 0.187386 | 0.012257 | 0.029375 |
| NPEPPS   | 0.167411 | 0.02551  | 0.054544 |
| NPFFR1   | -0.05396 | 0.474383 | 0.584052 |
| NPFFR2   | -0.06878 | 0.361653 | 0.474856 |
| NPFF     | 0.150814 | 0.044491 | 0.0872   |
| NPHP1    | -0.25562 | 0.000574 | 0.002138 |
| NPHP3    | 0.021971 | 0.770979 | 0.837012 |
| NPHP4    | -0.24847 | 0.000825 | 0.002919 |
| NPHS1    | -0.2743  | 0.000211 | 0.000906 |
| NPHS2    | -0.04543 | 0.547103 | 0.649598 |
| NPIPL3   | 0.312952 | 2.11E-05 | 0.000124 |
| NPIP     | -0.11883 | 0.114144 | 0.189879 |
| NPLOC4   | -0.10185 | 0.176132 | 0.268551 |
| NPL      | 0.039794 | 0.597921 | 0.694874 |
| NPM1     | 0.102824 | 0.172002 | 0.263758 |
| NPM2     | -0.04371 | 0.562375 | 0.663192 |
| NPM3     | 0.235101 | 0.001583 | 0.00511  |
| NPNT     | -0.04491 | 0.55166  | 0.653831 |
| NPPA     | -0.11027 | 0.142834 | 0.227169 |
| NPPB     | -0.20102 | 0.007134 | 0.018506 |
| NPPC     | -0.04052 | 0.591254 | 0.688787 |

|         |          |          |          |
|---------|----------|----------|----------|
| NPR1    | -0.3561  | 1.07E-06 | 9.22E-06 |
| NPR2    | 0.138012 | 0.06619  | 0.121346 |
| NPR3    | 0.251876 | 0.000695 | 0.002515 |
| NPRL2   | -0.00255 | 0.973075 | 0.981761 |
| NPRL3   | 0.004867 | 0.948587 | 0.965182 |
| NPSR1   | 0.473709 | 2.42E-11 | 7.87E-10 |
| NPS     | 0.009971 | 0.894911 | 0.926588 |
| NPTN    | -0.02119 | 0.778951 | 0.842902 |
| NPTX1   | 0.351782 | 1.47E-06 | 1.21E-05 |
| NPTX2   | -0.12236 | 0.103716 | 0.175921 |
| NPTXR   | -0.16679 | 0.026073 | 0.05561  |
| NPW     | -0.14596 | 0.051888 | 0.099038 |
| NPY1R   | -0.16647 | 0.026357 | 0.056125 |
| NPY2R   | -0.11685 | 0.120334 | 0.197829 |
| NPY5R   | -0.25663 | 0.000544 | 0.002045 |
| NPY6R   | 0.038368 | 0.611124 | 0.706729 |
| NPY     | -0.03877 | 0.607353 | 0.703149 |
| NQ01    | 0.523796 | 6.26E-14 | 3.88E-12 |
| NQ02    | 0.127762 | 0.08922  | 0.155303 |
| NR0B1   | -0.20163 | 0.006957 | 0.018152 |
| NR0B2   | 0.035289 | 0.640037 | 0.731186 |
| NR1D1   | 0.260858 | 0.000437 | 0.001693 |
| NR1D2   | -0.27742 | 0.000178 | 0.000781 |
| NR1H2   | 0.273832 | 0.000217 | 0.000927 |
| NR1H3   | 0.43542  | 1.25E-09 | 2.55E-08 |
| NR1H4   | 0.11826  | 0.115905 | 0.192144 |
| NR1I2   | 0.441087 | 7.17E-10 | 1.59E-08 |
| NR1I3   | 0.025823 | 0.732238 | 0.80633  |
| NR2C1   | 0.03122  | 0.679103 | 0.763986 |
| NR2C2AP | 0.348571 | 1.86E-06 | 1.49E-05 |
| NR2C2   | -0.28616 | 0.000108 | 0.000507 |
| NR2E1   | 0.145489 | 0.052659 | 0.100248 |
| NR2E3   | 0.151011 | 0.044209 | 0.08673  |
| NR2F1   | 0.080781 | 0.283762 | 0.392687 |
| NR2F2   | -0.03207 | 0.67086  | 0.757817 |
| NR2F6   | 0.295608 | 6.18E-05 | 0.000313 |
| NR3C1   | -0.04535 | 0.547805 | 0.650237 |
| NR3C2   | -0.21394 | 0.004137 | 0.011653 |
| NR4A1   | -0.15647 | 0.037005 | 0.074689 |
| NR4A2   | -0.04929 | 0.513473 | 0.619564 |
| NR4A3   | -0.19762 | 0.008189 | 0.020847 |
| NR5A1   | 0.115551 | 0.124556 | 0.203332 |
| NR5A2   | -0.04804 | 0.52423  | 0.629586 |
| NR6A1   | 0.057141 | 0.448687 | 0.559847 |
| NRADDP  | 0.413164 | 9.95E-09 | 1.57E-07 |
| NRAP    | -0.10322 | 0.170336 | 0.261812 |
| NRARP   | 0.042692 | 0.571513 | 0.671406 |
| NRAS    | 0.10947  | 0.145782 | 0.230948 |
| NRBF2   | 0.155788 | 0.037846 | 0.076076 |
| NRBP1   | 0.251702 | 0.000701 | 0.002535 |
| NRBP2   | 0.295986 | 6.04E-05 | 0.000308 |
| NRCAM   | -0.42255 | 4.22E-09 | 7.50E-08 |
| NRD1    | -0.11238 | 0.135288 | 0.217513 |
| NRF1    | -0.40184 | 2.70E-08 | 3.73E-07 |

|         |          |          |          |
|---------|----------|----------|----------|
| NRG1    | -0.12862 | 0.08707  | 0.152352 |
| NRG2    | -0.33451 | 5.03E-06 | 3.58E-05 |
| NRG3    | 0.259802 | 0.000462 | 0.001773 |
| NRG4    | 0.110847 | 0.140749 | 0.224486 |
| NRGN    | -0.02295 | 0.761029 | 0.829535 |
| NRIP1   | -0.03671 | 0.626577 | 0.719958 |
| NRIP2   | -0.26869 | 0.000287 | 0.001184 |
| NRIP3   | 0.226392 | 0.002376 | 0.00723  |
| NRK     | -0.05423 | 0.472169 | 0.582014 |
| NRL     | -0.25906 | 0.00048  | 0.001835 |
| NRM     | 0.386863 | 9.60E-08 | 1.12E-06 |
| NRN1L   | 0.004121 | 0.95646  | 0.970098 |
| NRN1    | -0.33334 | 5.45E-06 | 3.84E-05 |
| NRP1    | -0.19748 | 0.008235 | 0.020931 |
| NRP2    | 0.401049 | 2.90E-08 | 3.93E-07 |
| NRSN1   | -0.16638 | 0.026444 | 0.05628  |
| NRSN2   | -0.42676 | 2.85E-09 | 5.30E-08 |
| NRTN    | -0.24445 | 0.001008 | 0.003456 |
| NRXN1   | -0.29032 | 8.46E-05 | 0.000411 |
| NRXN2   | 0.101907 | 0.175876 | 0.268244 |
| NRXN3   | -0.20079 | 0.007201 | 0.018644 |
| NSA2    | -0.10229 | 0.174262 | 0.266604 |
| NSD1    | -0.34617 | 2.21E-06 | 1.74E-05 |
| NSDHL   | 0.291739 | 7.78E-05 | 0.000382 |
| NSFL1C  | 0.020005 | 0.790971 | 0.852079 |
| NSF     | -0.2249  | 0.002544 | 0.007673 |
| NSL1    | -0.37209 | 3.15E-07 | 3.19E-06 |
| NSMAF   | -0.11478 | 0.127099 | 0.206738 |
| NSMCE1  | 0.25754  | 0.000519 | 0.001963 |
| NSMCE2  | 0.205901 | 0.005828 | 0.015598 |
| NSMCE4A | 0.053967 | 0.474325 | 0.584016 |
| NSUN2   | 0.023929 | 0.751207 | 0.821455 |
| NSUN3   | 0.110441 | 0.142217 | 0.226407 |
| NSUN4   | -0.06232 | 0.408572 | 0.520762 |
| NSUN5P1 | 0.161879 | 0.030868 | 0.064156 |
| NSUN5P2 | 0.15376  | 0.040447 | 0.08047  |
| NSUN5   | 0.349233 | 1.77E-06 | 1.43E-05 |
| NSUN6   | -0.13021 | 0.083208 | 0.146815 |
| NSUN7   | 0.025433 | 0.736134 | 0.809354 |
| NT5C1A  | -0.26297 | 0.000391 | 0.001538 |
| NT5C1B  | -0.00241 | 0.974486 | 0.982585 |
| NT5C2   | 0.212378 | 0.004427 | 0.012318 |
| NT5C3L  | -0.13691 | 0.068414 | 0.12481  |
| NT5C3   | 0.028799 | 0.702763 | 0.783118 |
| NT5C    | 0.371882 | 3.20E-07 | 3.24E-06 |
| NT5DC1  | -0.16134 | 0.031436 | 0.065111 |
| NT5DC2  | 0.142622 | 0.057548 | 0.107883 |
| NT5DC3  | -0.18429 | 0.013795 | 0.032455 |
| NT5E    | 0.291663 | 7.81E-05 | 0.000383 |
| NT5M    | -0.31708 | 1.62E-05 | 9.83E-05 |
| NTAN1   | 0.295086 | 6.37E-05 | 0.000322 |
| NTF3    | 0.213587 | 0.004201 | 0.011802 |
| NTF4    | 0.60282  | 5.43E-19 | 1.26E-16 |
| NTHL1   | 0.22715  | 0.002295 | 0.007024 |

|          |          |          |          |
|----------|----------|----------|----------|
| NTM      | 0.338143 | 3.91E-06 | 2.86E-05 |
| NTN1     | -0.15565 | 0.038017 | 0.076346 |
| NTN3     | -0.25811 | 0.000504 | 0.001916 |
| NTN4     | 0.039775 | 0.598101 | 0.694944 |
| NTN5     | -0.06591 | 0.382076 | 0.49487  |
| NTNG1    | 0.021434 | 0.776423 | 0.84126  |
| NTNG2    | 0.009802 | 0.896684 | 0.927986 |
| NTRK1    | -0.08595 | 0.253993 | 0.360188 |
| NTRK2    | -0.30496 | 3.49E-05 | 0.000192 |
| NTRK3    | -0.1292  | 0.085657 | 0.150344 |
| NTSR1    | 0.374722 | 2.56E-07 | 2.67E-06 |
| NTSR2    | -0.14962 | 0.046227 | 0.089992 |
| NTS      | -0.03865 | 0.608456 | 0.704137 |
| NUAK1    | -0.04328 | 0.566213 | 0.666645 |
| NUAK2    | -0.46028 | 1.02E-10 | 2.85E-09 |
| NUB1     | -0.05958 | 0.429513 | 0.541312 |
| NUBP1    | -0.08918 | 0.236492 | 0.340398 |
| NUBP2    | 0.124816 | 0.096911 | 0.16629  |
| NUBPL    | -0.21929 | 0.003272 | 0.009502 |
| NUCB1    | -0.14487 | 0.053684 | 0.101877 |
| NUCB2    | -0.50125 | 1.03E-12 | 4.73E-11 |
| NUCKS1   | -0.17621 | 0.018632 | 0.041801 |
| NUDCD1   | -0.05698 | 0.450002 | 0.560815 |
| NUDCD2   | -0.03174 | 0.674041 | 0.760358 |
| NUDCD3   | 0.048427 | 0.520922 | 0.626507 |
| NUDC     | 0.123324 | 0.101001 | 0.172023 |
| NUDT10   | -0.12497 | 0.096492 | 0.165685 |
| NUDT11   | -0.20941 | 0.005025 | 0.013755 |
| NUDT12   | -0.05575 | 0.45984  | 0.570337 |
| NUDT13   | 0.236947 | 0.00145  | 0.004733 |
| NUDT14   | 0.097502 | 0.195401 | 0.292185 |
| NUDT15   | 0.180649 | 0.015819 | 0.036441 |
| NUDT16L1 | -0.09218 | 0.22106  | 0.322934 |
| NUDT16P1 | 0.19789  | 0.008101 | 0.020662 |
| NUDT16   | -0.04365 | 0.562924 | 0.663641 |
| NUDT17   | 0.019024 | 0.801005 | 0.859978 |
| NUDT18   | 0.03434  | 0.649064 | 0.738342 |
| NUDT19   | 0.016346 | 0.828547 | 0.878764 |
| NUDT1    | 0.280466 | 0.000149 | 0.000674 |
| NUDT21   | 0.054266 | 0.471876 | 0.581835 |
| NUDT22   | 0.31654  | 1.67E-05 | 0.000101 |
| NUDT2    | 0.012111 | 0.872525 | 0.911855 |
| NUDT3    | -0.03689 | 0.624885 | 0.718446 |
| NUDT4    | -0.09464 | 0.208895 | 0.308583 |
| NUDT5    | 0.27993  | 0.000154 | 0.000693 |
| NUDT6    | 0.13586  | 0.070571 | 0.12812  |
| NUDT7    | -0.0621  | 0.410269 | 0.522352 |
| NUDT8    | 0.445449 | 4.65E-10 | 1.09E-08 |
| NUDT9P1  | -0.35223 | 1.42E-06 | 1.18E-05 |
| NUDT9    | -0.40265 | 2.52E-08 | 3.52E-07 |
| NUF2     | 0.355142 | 1.15E-06 | 9.78E-06 |
| NUFIP1   | 0.079604 | 0.290859 | 0.400379 |
| NUFIP2   | 0.144304 | 0.054636 | 0.103415 |
| NUMA1    | 0.161377 | 0.031398 | 0.065053 |

|         |          |          |          |
|---------|----------|----------|----------|
| NUMBL   | 0.154211 | 0.039855 | 0.079428 |
| NUMB    | 0.232334 | 0.001804 | 0.00571  |
| NUP107  | 0.066871 | 0.375144 | 0.488194 |
| NUP133  | -0.1405  | 0.061397 | 0.113804 |
| NUP153  | -0.38516 | 1.10E-07 | 1.27E-06 |
| NUP155  | -0.17634 | 0.018541 | 0.041621 |
| NUP160  | -0.1425  | 0.057763 | 0.108198 |
| NUP188  | -0.22399 | 0.00265  | 0.007941 |
| NUP205  | -0.26086 | 0.000437 | 0.001693 |
| NUP210L | -0.10509 | 0.162698 | 0.25223  |
| NUP210  | -0.27832 | 0.000169 | 0.000748 |
| NUP214  | -0.37947 | 1.75E-07 | 1.91E-06 |
| NUP35   | 0.01751  | 0.816549 | 0.870146 |
| NUP37   | 0.191162 | 0.010586 | 0.02594  |
| NUP43   | -0.14499 | 0.053485 | 0.101546 |
| NUP50   | -0.10919 | 0.146802 | 0.232248 |
| NUP54   | -0.01404 | 0.852467 | 0.896951 |
| NUP62CL | 0.204926 | 0.00607  | 0.016129 |
| NUP62   | 0.004768 | 0.949632 | 0.965898 |
| NUP85   | 0.209936 | 0.004915 | 0.013496 |
| NUP88   | -0.3337  | 5.32E-06 | 3.76E-05 |
| NUP93   | 0.35408  | 1.24E-06 | 1.05E-05 |
| NUP98   | -0.05514 | 0.464738 | 0.574843 |
| NUPL1   | -0.1774  | 0.017837 | 0.040327 |
| NUPL2   | -0.18851 | 0.011735 | 0.028299 |
| NUPR1   | 0.255422 | 0.00058  | 0.002156 |
| NUS1    | -0.23538 | 0.001563 | 0.005048 |
| NUSAP1  | 0.361886 | 6.93E-07 | 6.34E-06 |
| NUTF2   | 0.412539 | 1.05E-08 | 1.65E-07 |
| NVL     | 0.005235 | 0.944713 | 0.962704 |
| NWD1    | -0.02716 | 0.718981 | 0.795542 |
| NXF1    | -0.06616 | 0.380267 | 0.493075 |
| NXF2B   | -0.40033 | 3.08E-08 | 4.16E-07 |
| NXF2    | -0.38021 | 1.65E-07 | 1.82E-06 |
| NXF3    | 0.330247 | 6.73E-06 | 4.60E-05 |
| NXF4    | -0.12673 | 0.091853 | 0.159065 |
| NXF5    | -0.37158 | 3.28E-07 | 3.30E-06 |
| NXNL1   | -0.07623 | 0.311821 | 0.422673 |
| NXNL2   | 0.381967 | 1.43E-07 | 1.60E-06 |
| NXN     | -0.05175 | 0.49268  | 0.601151 |
| NXPH1   | -0.31934 | 1.39E-05 | 8.67E-05 |
| NXPH2   | -0.08418 | 0.263906 | 0.371157 |
| NXPH3   | -0.04923 | 0.514022 | 0.620075 |
| NXPH4   | -0.27383 | 0.000217 | 0.000927 |
| NXT1    | 0.06736  | 0.371658 | 0.484683 |
| NXT2    | 0.063355 | 0.400825 | 0.513469 |
| NYNRIN  | 0.126927 | 0.09135  | 0.158327 |
| NYX     | -0.03782 | 0.616247 | 0.711074 |
| OAF     | 0.292549 | 7.41E-05 | 0.000366 |
| OAS1    | 0.503491 | 7.87E-13 | 3.68E-11 |
| OAS2    | 0.391549 | 6.50E-08 | 8.00E-07 |
| OAS3    | 0.308656 | 2.77E-05 | 0.000157 |
| OASL    | 0.558751 | 5.28E-16 | 5.18E-14 |
| OAT     | -0.27348 | 0.000221 | 0.000943 |



|         |          |          |          |
|---------|----------|----------|----------|
| OAZ1    | 0.068146 | 0.366085 | 0.479465 |
| OAZ2    | -0.40227 | 2.61E-08 | 3.61E-07 |
| OAZ3    | -0.00998 | 0.894769 | 0.926538 |
| OBFC1   | 0.48499  | 6.87E-12 | 2.58E-10 |
| OBFC2A  | 0.254917 | 0.000595 | 0.002203 |
| OBFC2B  | -0.01438 | 0.848869 | 0.893846 |
| OBP2A   | 0.228117 | 0.002195 | 0.00676  |
| OBP2B   | 0.118748 | 0.114399 | 0.190191 |
| OBSCN   | 0.184416 | 0.01373  | 0.032332 |
| OBSL1   | -0.01888 | 0.802523 | 0.860906 |
| OC90    | -0.10621 | 0.158229 | 0.246597 |
| OCA2    | -0.05359 | 0.477452 | 0.587026 |
| OCEL1   | 0.47518  | 2.06E-11 | 6.81E-10 |
| OCIAD1  | -0.13898 | 0.064289 | 0.118299 |
| OCIAD2  | 0.570609 | 9.17E-17 | 1.13E-14 |
| OCLM    | 0.157411 | 0.035867 | 0.072779 |
| OCLN    | 0.179845 | 0.016299 | 0.037412 |
| OCM2    | -0.03112 | 0.680106 | 0.764853 |
| OCM     | -0.03329 | 0.659118 | 0.74767  |
| OCRL    | -0.31786 | 1.54E-05 | 9.43E-05 |
| ODAM    | 0.322069 | 1.16E-05 | 7.43E-05 |
| ODC1    | -0.24581 | 0.000942 | 0.00326  |
| ODF1    | 0.018244 | 0.809005 | 0.864764 |
| ODF2L   | -0.02988 | 0.692164 | 0.774457 |
| ODF2    | -0.26648 | 0.000324 | 0.00131  |
| ODF3B   | 0.305083 | 3.46E-05 | 0.000191 |
| ODF3L1  | -0.23164 | 0.001864 | 0.005871 |
| ODF3L2  | -0.09326 | 0.215647 | 0.316665 |
| ODF3    | 0.077178 | 0.305854 | 0.416136 |
| ODF4    | 0.09553  | 0.204636 | 0.303606 |
| ODZ1    | -0.17725 | 0.017933 | 0.0405   |
| ODZ2    | -0.15566 | 0.038002 | 0.076328 |
| ODZ3    | -0.15429 | 0.039751 | 0.07929  |
| ODZ4    | -0.01854 | 0.80597  | 0.862553 |
| OFD1    | 0.161432 | 0.031339 | 0.064952 |
| OGDHL   | -0.30997 | 2.55E-05 | 0.000146 |
| OGDH    | -0.13461 | 0.073215 | 0.132011 |
| OGFOD1  | 0.260387 | 0.000448 | 0.001729 |
| OGFOD2  | -0.02245 | 0.766075 | 0.833335 |
| OGFRL1  | 0.014262 | 0.850134 | 0.895036 |
| OGFR    | 0.165575 | 0.027192 | 0.057593 |
| OGG1    | 0.058831 | 0.435365 | 0.546875 |
| OGN     | -0.08309 | 0.270151 | 0.377924 |
| OGT     | 0.055335 | 0.463179 | 0.573435 |
| OIP5    | 0.359297 | 8.42E-07 | 7.47E-06 |
| OIT3    | -0.22416 | 0.002631 | 0.007891 |
| OLA1    | 0.156791 | 0.036612 | 0.074002 |
| OLAH    | -0.05762 | 0.444903 | 0.556394 |
| OLFM1   | -0.27765 | 0.000175 | 0.000772 |
| OLFM2   | -0.07787 | 0.301516 | 0.411668 |
| OLFM3   | -0.21482 | 0.003983 | 0.011285 |
| OLFM4   | 0.332508 | 5.77E-06 | 4.03E-05 |
| OLFML1  | 0.046399 | 0.538549 | 0.641771 |
| OLFML2A | -0.10213 | 0.174938 | 0.267309 |

|         |          |          |          |
|---------|----------|----------|----------|
| OLFML2B | 0.120075 | 0.110378 | 0.185062 |
| OLFML3  | -0.02211 | 0.769566 | 0.835969 |
| OLIG1   | -0.07224 | 0.337901 | 0.450247 |
| OLIG2   | 0.097123 | 0.197152 | 0.294314 |
| OLIG3   | 0.039157 | 0.603804 | 0.699901 |
| OLR1    | 0.27507  | 0.000202 | 0.000875 |
| OMA1    | 0.103124 | 0.170745 | 0.262269 |
| OMD     | 0.048656 | 0.518952 | 0.624612 |
| OMG     | 0.115395 | 0.125069 | 0.204053 |
| OMP     | 0.259003 | 0.000481 | 0.00184  |
| ONECUT1 | -0.01911 | 0.800088 | 0.859367 |
| ONECUT2 | 0.195985 | 0.008746 | 0.02202  |
| ONECUT3 | 0.492997 | 2.73E-12 | 1.14E-10 |
| OOEP    | 0.03262  | 0.66556  | 0.753164 |
| OPA1    | -0.08102 | 0.282345 | 0.391    |
| OPA3    | -0.12878 | 0.086676 | 0.151797 |
| OPALIN  | 0.02682  | 0.722317 | 0.798296 |
| OPCML   | 0.168904 | 0.024209 | 0.05218  |
| OPHN1   | -0.3364  | 4.41E-06 | 3.19E-05 |
| OPLAH   | 0.401096 | 2.88E-08 | 3.92E-07 |
| OPN1LW  | -0.12417 | 0.098676 | 0.168689 |
| OPN1MW  | -0.15095 | 0.044301 | 0.08688  |
| OPN1SW  | -0.05134 | 0.496148 | 0.603696 |
| OPN3    | 0.331226 | 6.30E-06 | 4.36E-05 |
| OPN4    | -0.0073  | 0.922913 | 0.946603 |
| OPN5    | -0.05924 | 0.432202 | 0.544042 |
| OPRD1   | -0.30269 | 4.01E-05 | 0.000217 |
| OPRK1   | -0.132   | 0.079014 | 0.140682 |
| OPRL1   | 0.006035 | 0.936273 | 0.956591 |
| OPRM1   | -0.20218 | 0.0068   | 0.017807 |
| OPTC    | 0.077685 | 0.30268  | 0.412943 |
| OPTN    | 0.257439 | 0.000522 | 0.001972 |
| OR10A2  | 0.088079 | 0.242357 | 0.346896 |
| OR10A3  | 0.024135 | 0.749139 | 0.819828 |
| OR10A4  | -0.07068 | 0.34847  | 0.460944 |
| OR10A5  | 0.023677 | 0.753744 | 0.823683 |
| OR10A6  | -0.01994 | 0.79168  | 0.852652 |
| OR10AD1 | -0.09104 | 0.226819 | 0.329401 |
| OR10G2  | 0.070876 | 0.347157 | 0.459606 |
| OR10G3  | -0.05933 | 0.43144  | 0.543326 |
| OR10G4  | -0.2134  | 0.004235 | 0.011877 |
| OR10G7  | -0.08582 | 0.254723 | 0.361068 |
| OR10G8  | -0.10618 | 0.158365 | 0.24677  |
| OR10G9  | -0.00097 | 0.989781 | 0.992542 |
| OR10H1  | 0.327006 | 8.38E-06 | 5.56E-05 |
| OR10H2  | 0.117114 | 0.119505 | 0.196777 |
| OR10H5  | 0.17651  | 0.018429 | 0.041411 |
| OR10J1  | 0.013574 | 0.857287 | 0.900552 |
| OR10P1  | 0.035426 | 0.638743 | 0.730029 |
| OR10Q1  | 0.029838 | 0.692573 | 0.774673 |
| OR10V1  | -0.14145 | 0.059657 | 0.111047 |
| OR10W1  | 0.00904  | 0.904676 | 0.933521 |
| OR11A1  | -0.08338 | 0.268493 | 0.376111 |
| OR11G2  | 0.047409 | 0.529738 | 0.634197 |

|         |          |          |          |
|---------|----------|----------|----------|
| OR11H12 | -0.07235 | 0.337199 | 0.449554 |
| OR11H4  | -0.20669 | 0.005639 | 0.015163 |
| OR11H6  | -0.06901 | 0.360056 | 0.473199 |
| OR12D2  | -0.13528 | 0.071783 | 0.129981 |
| OR12D3  | -0.06891 | 0.36074  | 0.473877 |
| OR13A1  | -0.17771 | 0.017635 | 0.039927 |
| OR13C2  | -0.28838 | 9.48E-05 | 0.000453 |
| OR13C5  | -0.16498 | 0.027753 | 0.0586   |
| OR13D1  | 0.030074 | 0.69026  | 0.773326 |
| OR13F1  | -0.00761 | 0.919734 | 0.944279 |
| OR13G1  | -0.05793 | 0.442409 | 0.554174 |
| OR13H1  | 0.004221 | 0.95541  | 0.969481 |
| OR13J1  | 0.181306 | 0.015436 | 0.035695 |
| OR14I1  | -0.25817 | 0.000503 | 0.001912 |
| OR1A2   | 0.107472 | 0.153323 | 0.240638 |
| OR1B1   | 0.023584 | 0.754682 | 0.824388 |
| OR1C1   | -0.05313 | 0.4812   | 0.590533 |
| OR1D4   | -0.07991 | 0.289016 | 0.398397 |
| OR1E1   | 0.046162 | 0.540624 | 0.643723 |
| OR1E2   | 0.078912 | 0.295084 | 0.40497  |
| OR1F1   | -0.10615 | 0.15849  | 0.246887 |
| OR1F2P  | 0.015012 | 0.842356 | 0.888644 |
| OR1G1   | 0.036212 | 0.631313 | 0.72356  |
| OR1J1   | 0.004631 | 0.951076 | 0.96696  |
| OR1J2   | 0.051385 | 0.495756 | 0.603561 |
| OR1J4   | 0.027467 | 0.715903 | 0.793424 |
| OR1K1   | -0.12234 | 0.103777 | 0.176009 |
| OR1L3   | -0.03626 | 0.630819 | 0.723191 |
| OR1L4   | -0.04775 | 0.526792 | 0.632048 |
| OR1L6   | -0.07222 | 0.338095 | 0.450322 |
| OR1L8   | -0.13764 | 0.066928 | 0.122495 |
| OR1N1   | -0.04184 | 0.579235 | 0.678101 |
| OR1N2   | -0.12447 | 0.097843 | 0.167642 |
| OR1Q1   | -0.07468 | 0.321819 | 0.43355  |
| OR2A12  | 0.086094 | 0.253179 | 0.359291 |
| OR2A14  | 0.158553 | 0.034528 | 0.070486 |
| OR2A1   | -0.02725 | 0.718085 | 0.795092 |
| OR2A25  | -0.07579 | 0.314634 | 0.425697 |
| OR2A2   | -0.00202 | 0.978637 | 0.985264 |
| OR2A4   | 0.084264 | 0.263441 | 0.370635 |
| OR2A5   | 0.069737 | 0.354978 | 0.467927 |
| OR2A7   | 0.321899 | 1.18E-05 | 7.49E-05 |
| OR2A9P  | 0.070931 | 0.346782 | 0.459202 |
| OR2AE1  | -0.08766 | 0.2446   | 0.349384 |
| OR2AG1  | -0.0165  | 0.826913 | 0.877408 |
| OR2AG2  | -0.06165 | 0.41363  | 0.525684 |
| OR2AK2  | -0.01015 | 0.89307  | 0.925331 |
| OR2AT4  | -0.01329 | 0.860248 | 0.902799 |
| OR2B11  | -0.00361 | 0.961842 | 0.974009 |
| OR2B2   | 0.11894  | 0.113809 | 0.189449 |
| OR2B6   | 0.242047 | 0.001134 | 0.003828 |
| OR2C1   | -0.36448 | 5.68E-07 | 5.32E-06 |
| OR2C3   | -0.17149 | 0.022089 | 0.048232 |
| OR2D2   | -0.11224 | 0.135788 | 0.218107 |

|        |          |          |          |
|--------|----------|----------|----------|
| OR2D3  | 0.030782 | 0.68336  | 0.76783  |
| OR2F1  | -0.02558 | 0.734676 | 0.808205 |
| OR2F2  | -0.00414 | 0.956275 | 0.970006 |
| OR2G2  | 0.038147 | 0.613177 | 0.708606 |
| OR2G3  | -0.0118  | 0.875824 | 0.914003 |
| OR2G6  | 0.051541 | 0.494447 | 0.602564 |
| OR2H1  | -0.12749 | 0.08992  | 0.156301 |
| OR2H2  | -0.04322 | 0.566773 | 0.666906 |
| OR2J2  | 0.042603 | 0.572316 | 0.672069 |
| OR2J3  | -0.02652 | 0.725303 | 0.800968 |
| OR2K2  | -0.15685 | 0.036539 | 0.073894 |
| OR2L13 | -0.32193 | 1.18E-05 | 7.48E-05 |
| OR2L1P | -0.06274 | 0.405439 | 0.51797  |
| OR2L2  | -0.10678 | 0.155994 | 0.244075 |
| OR2L3  | -0.05653 | 0.453585 | 0.56449  |
| OR2M4  | -0.04577 | 0.544103 | 0.647056 |
| OR2S2  | 0.079588 | 0.290951 | 0.400478 |
| OR2T10 | -0.23085 | 0.001934 | 0.006061 |
| OR2T11 | 0.002936 | 0.968972 | 0.978673 |
| OR2T2  | -0.04667 | 0.536167 | 0.639687 |
| OR2T33 | -0.13478 | 0.072854 | 0.131491 |
| OR2T3  | 0.027998 | 0.710652 | 0.789463 |
| OR2T4  | -0.24328 | 0.001067 | 0.003629 |
| OR2T5  | -0.0487  | 0.518597 | 0.624409 |
| OR2T8  | -0.10595 | 0.159278 | 0.24788  |
| OR2W3  | -0.18446 | 0.013709 | 0.032307 |
| OR2W5  | 0.017065 | 0.821135 | 0.873257 |
| OR2Z1  | 0.10668  | 0.156392 | 0.244582 |
| OR3A1  | -0.1422  | 0.058289 | 0.10896  |
| OR3A2  | -0.19041 | 0.010904 | 0.026603 |
| OR3A3  | -0.09838 | 0.191368 | 0.287197 |
| OR3A4  | -0.09018 | 0.231272 | 0.334761 |
| OR4A47 | -0.15515 | 0.038649 | 0.077399 |
| OR4C6  | 0.088607 | 0.239535 | 0.343827 |
| OR4D10 | -0.07383 | 0.327344 | 0.439198 |
| OR4D1  | -0.11499 | 0.1264   | 0.205799 |
| OR4D5  | -0.14608 | 0.051694 | 0.098754 |
| OR4D6  | -0.0753  | 0.31784  | 0.429506 |
| OR4E2  | -0.01837 | 0.807661 | 0.863794 |
| OR4F21 | -0.02323 | 0.758207 | 0.827279 |
| OR4F29 | 0.062913 | 0.404124 | 0.516759 |
| OR4K14 | 0.050914 | 0.49972  | 0.607007 |
| OR4N2  | -0.20052 | 0.007282 | 0.018842 |
| OR4N3P | -0.1042  | 0.166313 | 0.256787 |
| OR4N4  | 0.007662 | 0.919147 | 0.94402  |
| OR51A7 | -0.11001 | 0.143801 | 0.228304 |
| OR51B2 | 0.088417 | 0.240547 | 0.344929 |
| OR51B4 | -0.06913 | 0.359197 | 0.472227 |
| OR51B5 | -0.10247 | 0.173488 | 0.265625 |
| OR51B6 | 0.091222 | 0.225893 | 0.32837  |
| OR51E1 | -0.00576 | 0.939139 | 0.959024 |
| OR51E2 | 0.092683 | 0.218514 | 0.320077 |
| OR51I1 | -0.02619 | 0.728577 | 0.803418 |
| OR51M1 | -0.00529 | 0.944158 | 0.96236  |

|          |          |          |          |
|----------|----------|----------|----------|
| OR51Q1   | -0.07268 | 0.334993 | 0.447185 |
| OR51S1   | -0.01671 | 0.824779 | 0.875943 |
| OR52B2   | 0.077328 | 0.304915 | 0.415391 |
| OR52B4   | -0.10056 | 0.181683 | 0.275421 |
| OR52B6   | 0.047716 | 0.527068 | 0.632303 |
| OR52D1   | 0.034469 | 0.647833 | 0.737663 |
| OR52H1   | 0.022726 | 0.763338 | 0.831502 |
| OR52I1   | -0.06494 | 0.389147 | 0.501629 |
| OR52I2   | -0.20925 | 0.00506  | 0.013835 |
| OR52K1   | 0.103733 | 0.16822  | 0.259286 |
| OR52K2   | 0.051003 | 0.498974 | 0.606324 |
| OR52L1   | 0.051233 | 0.497036 | 0.604564 |
| OR52N1   | -0.04345 | 0.564652 | 0.665282 |
| OR52N2   | 0.156107 | 0.037449 | 0.07541  |
| OR52N4   | -0.01877 | 0.803652 | 0.861571 |
| OR52N5   | -0.02423 | 0.748144 | 0.819056 |
| OR52R1   | -0.0906  | 0.229101 | 0.332105 |
| OR52W1   | -0.14357 | 0.055888 | 0.10538  |
| OR56A5   | -0.02476 | 0.742827 | 0.814764 |
| OR56B1   | 0.017815 | 0.813412 | 0.867857 |
| OR56B4   | 0.01219  | 0.871705 | 0.911292 |
| OR5AK2   | -0.04943 | 0.51235  | 0.61851  |
| OR5AN1   | 0.095574 | 0.204428 | 0.30332  |
| OR5AP2   | 0.026133 | 0.729142 | 0.803861 |
| OR5AU1   | -0.0865  | 0.250959 | 0.356729 |
| OR5B12   | 0.003053 | 0.967735 | 0.978023 |
| OR5B21   | -0.09829 | 0.191802 | 0.287674 |
| OR5B2    | 0.003174 | 0.966456 | 0.977194 |
| OR5C1    | 0.017965 | 0.811874 | 0.866799 |
| OR5E1P   | 0.134045 | 0.07445  | 0.13387  |
| OR5K1    | -0.03192 | 0.672353 | 0.758818 |
| OR5K2    | -0.11494 | 0.126564 | 0.205999 |
| OR5M11   | 0.045463 | 0.546781 | 0.649372 |
| OR5P2    | 0.009933 | 0.895305 | 0.926899 |
| OR5P3    | 0.000856 | 0.990951 | 0.993313 |
| OR6A2    | 0.184436 | 0.01372  | 0.03232  |
| OR6B1    | 0.096301 | 0.200989 | 0.299049 |
| OR6B2    | 0.026114 | 0.729339 | 0.803986 |
| OR6B3    | -0.12924 | 0.085543 | 0.150193 |
| OR6C70   | 0.052149 | 0.489364 | 0.597893 |
| OR6F1    | -0.12941 | 0.08514  | 0.14961  |
| OR6K3    | -0.06994 | 0.353578 | 0.466452 |
| OR6M1    | -0.07075 | 0.348008 | 0.460409 |
| OR6N1    | 0.038882 | 0.606352 | 0.702319 |
| OR6S1    | -0.02961 | 0.694766 | 0.776483 |
| OR6T1    | -0.20809 | 0.005316 | 0.014431 |
| OR6W1P   | 0.013749 | 0.855466 | 0.899165 |
| OR7A5    | -0.11333 | 0.132005 | 0.213188 |
| OR7C1    | -0.06471 | 0.390824 | 0.503463 |
| OR7D2    | -0.05306 | 0.481833 | 0.591199 |
| OR7D4    | -0.00861 | 0.909239 | 0.93647  |
| OR7E156P | -0.0774  | 0.304455 | 0.414878 |
| OR7E24   | 0.090949 | 0.227293 | 0.329897 |
| OR7E37P  | -0.23104 | 0.001916 | 0.006013 |

|         |          |          |          |
|---------|----------|----------|----------|
| OR7E5P  | -0.08189 | 0.277191 | 0.385185 |
| OR7E91P | 0.433674 | 1.48E-09 | 2.95E-08 |
| OR8A1   | -0.05636 | 0.454934 | 0.56592  |
| OR8D4   | -0.10368 | 0.168429 | 0.259528 |
| OR8G5   | 0.055949 | 0.45822  | 0.568901 |
| OR8S1   | 0.091514 | 0.224405 | 0.326662 |
| OR9A2   | 0.055998 | 0.45783  | 0.568735 |
| OR9A4   | -0.01736 | 0.818139 | 0.87109  |
| OR9G4   | -0.15001 | 0.045655 | 0.089129 |
| OR9G9   | -0.0328  | 0.663838 | 0.75202  |
| OR9I1   | -0.05526 | 0.46382  | 0.574049 |
| OR9Q1   | -0.00843 | 0.91109  | 0.937693 |
| ORAI1   | 0.186486 | 0.012688 | 0.03026  |
| ORAI2   | -0.35125 | 1.53E-06 | 1.25E-05 |
| ORAI3   | 0.417222 | 6.89E-09 | 1.15E-07 |
| ORAOV1  | 0.117571 | 0.11806  | 0.194917 |
| ORC1L   | 0.169072 | 0.024066 | 0.051913 |
| ORC2L   | 0.218776 | 0.003347 | 0.009688 |
| ORC3L   | -0.29413 | 6.75E-05 | 0.000338 |
| ORC4L   | 0.221295 | 0.002992 | 0.008832 |
| ORC5L   | -0.18404 | 0.013929 | 0.03272  |
| ORC6L   | 0.322933 | 1.10E-05 | 7.07E-05 |
| ORM1    | 0.077754 | 0.302248 | 0.412524 |
| ORM2    | 0.069815 | 0.354435 | 0.467396 |
| ORMDL1  | -0.01701 | 0.821669 | 0.873673 |
| ORMDL2  | 0.331849 | 6.04E-06 | 4.20E-05 |
| ORMDL3  | -0.04225 | 0.57552  | 0.67487  |
| OS9     | -0.28102 | 0.000145 | 0.000656 |
| OSBP2   | 0.003385 | 0.964235 | 0.975694 |
| OSBPL10 | 0.345058 | 2.39E-06 | 1.86E-05 |
| OSBPL11 | -0.00204 | 0.978442 | 0.985172 |
| OSBPL1A | 0.012201 | 0.871586 | 0.911292 |
| OSBPL2  | 0.164467 | 0.028252 | 0.059526 |
| OSBPL3  | 0.548172 | 2.38E-15 | 1.96E-13 |
| OSBPL5  | 0.251837 | 0.000696 | 0.00252  |
| OSBPL6  | -0.40273 | 2.50E-08 | 3.50E-07 |
| OSBPL7  | 0.512963 | 2.47E-13 | 1.33E-11 |
| OSBPL8  | -0.18911 | 0.011467 | 0.02776  |
| OSBPL9  | -0.00086 | 0.990952 | 0.993313 |
| OSBP    | -0.10196 | 0.175648 | 0.267984 |
| OSCAR   | 0.358806 | 8.74E-07 | 7.72E-06 |
| OSCP1   | -0.31273 | 2.14E-05 | 0.000125 |
| OSGEPL1 | -0.13324 | 0.076221 | 0.136535 |
| OSGEP   | 0.191395 | 0.01049  | 0.025745 |
| OSGIN1  | 0.428711 | 2.37E-09 | 4.49E-08 |
| OSGIN2  | -0.06246 | 0.407541 | 0.519772 |
| OSMR    | 0.144385 | 0.054498 | 0.103212 |
| OSM     | 0.218792 | 0.003345 | 0.009683 |
| OSR1    | -0.04684 | 0.534668 | 0.638322 |
| OSR2    | 0.129809 | 0.084172 | 0.148198 |
| OST4    | 0.337168 | 4.18E-06 | 3.04E-05 |
| OSTBETA | -0.13763 | 0.06696  | 0.122522 |
| OSTCL   | -0.09885 | 0.189279 | 0.28471  |
| OSTC    | 0.016069 | 0.831409 | 0.880478 |

|          |          |          |          |
|----------|----------|----------|----------|
| OSTF1    | 0.355346 | 1.13E-06 | 9.66E-06 |
| OSTM1    | -0.2017  | 0.006937 | 0.018103 |
| OSTN     | -0.08238 | 0.274281 | 0.382351 |
| OSTalpha | 0.109177 | 0.146868 | 0.232333 |
| OTC      | -0.12041 | 0.109376 | 0.183709 |
| OTOA     | 0.028743 | 0.703312 | 0.783564 |
| OTOF     | 0.038098 | 0.613636 | 0.708958 |
| OTOL1    | -0.12133 | 0.106686 | 0.180109 |
| OTOP1    | 0.011934 | 0.87438  | 0.913026 |
| OTOP2    | 0.177225 | 0.017953 | 0.04053  |
| OTOP3    | -0.20467 | 0.006135 | 0.016293 |
| OTOR     | 0.18271  | 0.014644 | 0.034172 |
| OTOS     | 0.056253 | 0.45578  | 0.566759 |
| OTP      | -0.15849 | 0.034607 | 0.070592 |
| OTUB1    | 0.358374 | 9.03E-07 | 7.93E-06 |
| OTUB2    | -0.01058 | 0.888553 | 0.922613 |
| OTUD1    | 0.003568 | 0.9623   | 0.974372 |
| OTUD3    | -0.21106 | 0.004684 | 0.012949 |
| OTUD4    | -0.13846 | 0.065308 | 0.119975 |
| OTUD5    | -0.09042 | 0.230021 | 0.333316 |
| OTUD6A   | -0.0978  | 0.194018 | 0.290557 |
| OTUD6B   | 0.007469 | 0.921175 | 0.945398 |
| OTUD7A   | -0.45368 | 2.02E-10 | 5.23E-09 |
| OTUD7B   | 0.095486 | 0.204845 | 0.30378  |
| OTX1     | 0.334006 | 5.21E-06 | 3.69E-05 |
| OTX2     | -0.1262  | 0.093224 | 0.160968 |
| OVCA2    | -0.09359 | 0.214024 | 0.314739 |
| OVCH1    | -0.11318 | 0.132522 | 0.213831 |
| OVCH2    | 0.03313  | 0.660649 | 0.749063 |
| OVGP1    | 0.056787 | 0.451508 | 0.562331 |
| OVOL1    | 0.469391 | 3.86E-11 | 1.22E-09 |
| OVOL2    | 0.361934 | 6.90E-07 | 6.31E-06 |
| OXA1L    | 0.025737 | 0.733095 | 0.807049 |
| OXCT1    | -0.20116 | 0.007094 | 0.018425 |
| OXCT2    | -0.13025 | 0.083105 | 0.146686 |
| OXER1    | -0.02417 | 0.748754 | 0.819498 |
| OXGR1    | -0.26273 | 0.000396 | 0.001556 |
| OXNAD1   | -0.00354 | 0.962633 | 0.974659 |
| OXR1     | 0.154317 | 0.039717 | 0.079242 |
| OXSM     | 0.175546 | 0.019088 | 0.042684 |
| OXSR1    | 0.345516 | 2.32E-06 | 1.81E-05 |
| OXTR     | 0.104437 | 0.165337 | 0.255533 |
| OXT      | 0.182786 | 0.014602 | 0.034086 |
| P2RX1    | -0.11866 | 0.114666 | 0.190522 |
| P2RX2    | -0.06066 | 0.421221 | 0.533378 |
| P2RX3    | -0.04587 | 0.54319  | 0.64622  |
| P2RX4    | -0.15642 | 0.037069 | 0.074781 |
| P2RX5    | -0.23922 | 0.0013   | 0.004307 |
| P2RX6    | -0.23699 | 0.001447 | 0.004724 |
| P2RX7    | -0.15648 | 0.036992 | 0.074671 |
| P2RY10   | -0.09216 | 0.221142 | 0.32303  |
| P2RY11   | 0.104748 | 0.164074 | 0.253985 |
| P2RY12   | -0.21371 | 0.004179 | 0.011753 |
| P2RY13   | -0.14447 | 0.054357 | 0.102965 |

|           |          |          |          |
|-----------|----------|----------|----------|
| P2RY14    | -0.16162 | 0.031137 | 0.064613 |
| P2RY1     | -0.06119 | 0.417121 | 0.529542 |
| P2RY2     | 0.643886 | 3.18E-22 | 1.97E-19 |
| P2RY4     | -0.00392 | 0.958567 | 0.971738 |
| P2RY6     | 0.250944 | 0.000728 | 0.002622 |
| P2RY8     | -0.19117 | 0.010584 | 0.025937 |
| P4HA1     | 0.234881 | 0.0016   | 0.005153 |
| P4HA2     | -0.02912 | 0.699603 | 0.780521 |
| P4HA3     | 0.151825 | 0.043066 | 0.084853 |
| P4HB      | -0.08516 | 0.258359 | 0.364887 |
| P4HTM     | -0.15455 | 0.039422 | 0.07878  |
| P704P     | 0.091145 | 0.226286 | 0.328813 |
| PA2G4P4   | 0.052923 | 0.48293  | 0.592105 |
| PA2G4     | 0.169599 | 0.023622 | 0.051173 |
| PAAF1     | 0.034194 | 0.650462 | 0.739549 |
| PABPC1L2A | -0.28868 | 9.31E-05 | 0.000446 |
| PABPC1L2E | -0.27518 | 0.000201 | 0.00087  |
| PABPC1L   | 0.145409 | 0.05279  | 0.100449 |
| PABPC1P2  | -0.02044 | 0.786563 | 0.848804 |
| PABPC1    | 0.202892 | 0.006604 | 0.017376 |
| PABPC3    | 0.059374 | 0.431125 | 0.543041 |
| PABPC4L   | -0.05008 | 0.50682  | 0.613708 |
| PABPC4    | -0.11824 | 0.115975 | 0.192197 |
| PABPC5    | -0.22359 | 0.002699 | 0.00807  |
| PABPN1L   | -0.21021 | 0.004857 | 0.013371 |
| PABPN1    | 0.128375 | 0.087683 | 0.153194 |
| PACRGL    | -0.0838  | 0.266114 | 0.373572 |
| PACRG     | -0.30989 | 2.56E-05 | 0.000146 |
| PACS1     | 0.320668 | 1.28E-05 | 8.03E-05 |
| PACS2     | 0.011435 | 0.879592 | 0.916437 |
| PACSIN1   | -0.40211 | 2.64E-08 | 3.65E-07 |
| PACSIN2   | -0.07558 | 0.315982 | 0.427306 |
| PACSIN3   | 0.27827  | 0.000169 | 0.00075  |
| PADI1     | 0.62839  | 6.01E-21 | 2.38E-18 |
| PADI2     | 0.061501 | 0.414773 | 0.526967 |
| PADI3     | 0.349907 | 1.69E-06 | 1.37E-05 |
| PADI4     | -0.16908 | 0.024063 | 0.051913 |
| PADI6     | -0.13499 | 0.072405 | 0.13086  |
| PAEP      | 0.207448 | 0.005461 | 0.014749 |
| PAF1      | 0.008691 | 0.908336 | 0.935784 |
| PAFAH1B1  | -0.51312 | 2.42E-13 | 1.31E-11 |
| PAFAH1B2  | -0.07969 | 0.290335 | 0.399769 |
| PAFAH1B3  | 0.232935 | 0.001754 | 0.005572 |
| PAFAH2    | 0.067901 | 0.367817 | 0.481382 |
| PAG1      | -0.14249 | 0.057773 | 0.108203 |
| PAGE1     | -0.04013 | 0.594814 | 0.692118 |
| PAGE2B    | 0.063799 | 0.397522 | 0.510296 |
| PAGE2     | -0.03214 | 0.670232 | 0.757367 |
| PAGE4     | 0.100532 | 0.181813 | 0.275492 |
| PAGE5     | -0.07661 | 0.309471 | 0.419948 |
| PAH       | -0.11584 | 0.123612 | 0.201976 |
| PAICS     | 0.156804 | 0.036597 | 0.073986 |
| PAIP1     | -0.08452 | 0.261964 | 0.36885  |
| PAIP2B    | -0.44407 | 5.34E-10 | 1.24E-08 |



|           |          |          |          |
|-----------|----------|----------|----------|
| PAIP2     | -0.50474 | 6.77E-13 | 3.23E-11 |
| PAK1IP1   | -0.05769 | 0.444318 | 0.555931 |
| PAK1      | 0.332236 | 5.88E-06 | 4.11E-05 |
| PAK2      | 0.104697 | 0.164281 | 0.254245 |
| PAK3      | -0.40479 | 2.09E-08 | 2.98E-07 |
| PAK4      | 0.237189 | 0.001434 | 0.004685 |
| PAK6      | 0.143979 | 0.055188 | 0.1043   |
| PAK7      | -0.27579 | 0.000194 | 0.000845 |
| PALB2     | 0.304395 | 3.61E-05 | 0.000197 |
| PALLD     | 0.034514 | 0.647407 | 0.737232 |
| PALM2-AKA | -0.25426 | 0.000615 | 0.002264 |
| PALM2     | -0.40005 | 3.16E-08 | 4.24E-07 |
| PALM3     | 0.333037 | 5.56E-06 | 3.91E-05 |
| PALMD     | -0.14653 | 0.050976 | 0.09756  |
| PALM      | -0.01904 | 0.80082  | 0.859826 |
| PAMR1     | 0.087497 | 0.245497 | 0.35035  |
| PAM       | -0.1436  | 0.055832 | 0.105285 |
| PAN2      | -0.23111 | 0.00191  | 0.005998 |
| PAN3      | 0.10729  | 0.154025 | 0.24151  |
| PANK1     | -0.37874 | 1.86E-07 | 2.01E-06 |
| PANK2     | -0.1654  | 0.027358 | 0.057911 |
| PANK3     | 0.021712 | 0.773602 | 0.838948 |
| PANK4     | -0.2841  | 0.000121 | 0.000564 |
| PANX1     | 0.239761 | 0.001267 | 0.004213 |
| PANX2     | 0.039942 | 0.596564 | 0.693795 |
| PANX3     | 0.054238 | 0.472106 | 0.581973 |
| PAOX      | 0.143129 | 0.056656 | 0.106514 |
| PAPD4     | 0.093711 | 0.213428 | 0.314082 |
| PAPD5     | -0.31341 | 2.05E-05 | 0.000121 |
| PAPD7     | -0.28683 | 0.000104 | 0.000491 |
| PAPLN     | 0.089681 | 0.233864 | 0.337821 |
| PAPL      | -0.11416 | 0.129181 | 0.209431 |
| PAPOLA    | -0.37615 | 2.29E-07 | 2.41E-06 |
| PAPOLB    | -0.26181 | 0.000415 | 0.001622 |
| PAPOLG    | -0.11652 | 0.121416 | 0.199044 |
| PAPPA2    | -0.22675 | 0.002337 | 0.007134 |
| PAPPA     | -0.09397 | 0.21215  | 0.312476 |
| PAPSS1    | -0.08514 | 0.258503 | 0.364961 |
| PAPSS2    | -0.41846 | 6.15E-09 | 1.04E-07 |
| PAQR3     | -0.20382 | 0.006356 | 0.016801 |
| PAQR4     | 0.434834 | 1.32E-09 | 2.68E-08 |
| PAQR5     | 0.265063 | 0.000349 | 0.001399 |
| PAQR6     | 0.18984  | 0.011147 | 0.027108 |
| PAQR7     | 0.094177 | 0.211152 | 0.311429 |
| PAQR8     | 0.135569 | 0.071182 | 0.129069 |
| PAQR9     | 0.193776 | 0.009551 | 0.02374  |
| PAR-SN    | -0.28108 | 0.000144 | 0.000654 |
| PAR1      | -0.18453 | 0.013669 | 0.032238 |
| PAR4      | -0.27096 | 0.000254 | 0.001062 |
| PAR5      | -0.29959 | 4.85E-05 | 0.000256 |
| PARD3B    | -0.08048 | 0.28558  | 0.394514 |
| PARD3     | 0.035092 | 0.641907 | 0.732899 |
| PARD6A    | -0.11839 | 0.1155   | 0.191634 |
| PARD6B    | 0.397402 | 3.96E-08 | 5.17E-07 |

|        |          |          |          |
|--------|----------|----------|----------|
| PARD6G | 0.064891 | 0.389481 | 0.501962 |
| PARG   | -0.06267 | 0.40597  | 0.518414 |
| PARK2  | -0.36723 | 4.60E-07 | 4.42E-06 |
| PARK7  | -0.08233 | 0.274595 | 0.382508 |
| PARL   | 0.145363 | 0.052865 | 0.100573 |
| PARM1  | -0.31777 | 1.54E-05 | 9.47E-05 |
| PARN   | 0.27499  | 0.000203 | 0.000878 |
| PARP10 | 0.254816 | 0.000598 | 0.002211 |
| PARP11 | -0.48532 | 6.61E-12 | 2.50E-10 |
| PARP12 | 0.44707  | 3.95E-10 | 9.48E-09 |
| PARP14 | 0.312103 | 2.22E-05 | 0.00013  |
| PARP15 | 0.081359 | 0.280317 | 0.388736 |
| PARP16 | 0.070831 | 0.34746  | 0.459915 |
| PARP1  | -0.18172 | 0.015201 | 0.035226 |
| PARP2  | -0.01738 | 0.817862 | 0.870889 |
| PARP3  | 0.503591 | 7.78E-13 | 3.65E-11 |
| PARP4  | 0.472572 | 2.74E-11 | 8.87E-10 |
| PARP6  | 0.003787 | 0.95999  | 0.972631 |
| PARP8  | 0.222929 | 0.00278  | 0.008279 |
| PARP9  | 0.223068 | 0.002763 | 0.008238 |
| PARS2  | -0.19208 | 0.010213 | 0.025136 |
| PART1  | -0.3166  | 1.67E-05 | 0.000101 |
| PARVA  | 0.123648 | 0.100101 | 0.170726 |
| PARVB  | -0.14183 | 0.058958 | 0.109993 |
| PARVG  | 0.100617 | 0.181441 | 0.275139 |
| PASD1  | -0.0563  | 0.455377 | 0.566365 |
| PASK   | -0.09092 | 0.227427 | 0.330066 |
| PATE1  | -0.08354 | 0.267606 | 0.375187 |
| PATE2  | -0.09887 | 0.189197 | 0.284613 |
| PATE3  | 0.002617 | 0.972342 | 0.981333 |
| PATE4  | -0.08577 | 0.254959 | 0.361299 |
| PATL1  | 0.373679 | 2.78E-07 | 2.85E-06 |
| PATL2  | -0.02836 | 0.707042 | 0.78669  |
| PATZ1  | -0.34281 | 2.81E-06 | 2.15E-05 |
| PAWR   | 0.139712 | 0.062887 | 0.116153 |
| PAX1   | 0.046593 | 0.536853 | 0.640274 |
| PAX2   | -0.07523 | 0.318231 | 0.429923 |
| PAX3   | 0.024836 | 0.742103 | 0.81411  |
| PAX4   | 0.052903 | 0.483096 | 0.592235 |
| PAX5   | -0.15105 | 0.044154 | 0.08665  |
| PAX6   | -0.28479 | 0.000117 | 0.000545 |
| PAX7   | 0.07711  | 0.306284 | 0.416554 |
| PAX8   | 0.353816 | 1.27E-06 | 1.07E-05 |
| PAX9   | 0.289489 | 8.88E-05 | 0.000429 |
| PAXIP1 | -0.20286 | 0.006612 | 0.017393 |
| PBK    | 0.346181 | 2.21E-06 | 1.74E-05 |
| PBLD   | -0.02715 | 0.719014 | 0.795542 |
| PBOV1  | -0.20118 | 0.007086 | 0.018413 |
| PBRM1  | -0.29572 | 6.13E-05 | 0.000311 |
| PBX1   | -0.20924 | 0.005063 | 0.013839 |
| PBX2   | -0.0394  | 0.60155  | 0.697862 |
| PBX3   | -0.44716 | 3.92E-10 | 9.40E-09 |
| PBX4   | 0.438979 | 8.82E-10 | 1.91E-08 |
| PBXIP1 | -0.15775 | 0.035467 | 0.072101 |

|          |          |          |          |
|----------|----------|----------|----------|
| PCA3     | -0.12303 | 0.101829 | 0.173225 |
| PCBD1    | -0.04036 | 0.59269  | 0.690053 |
| PCBD2    | 0.181637 | 0.015246 | 0.035313 |
| PCBP1    | 0.330251 | 6.73E-06 | 4.60E-05 |
| PCBP2    | -0.38666 | 9.76E-08 | 1.14E-06 |
| PCBP3    | -0.25757 | 0.000519 | 0.001961 |
| PCBP4    | 0.233956 | 0.001672 | 0.005349 |
| PCCA     | -0.20185 | 0.006895 | 0.018021 |
| PCCB     | -0.18852 | 0.011732 | 0.028295 |
| PCDH10   | -0.2997  | 4.82E-05 | 0.000255 |
| PCDH11X  | -0.12521 | 0.095864 | 0.164722 |
| PCDH11Y  | -0.11999 | 0.110623 | 0.185378 |
| PCDH12   | -0.12019 | 0.110045 | 0.184628 |
| PCDH15   | -0.28266 | 0.000132 | 0.000606 |
| PCDH17   | -0.25993 | 0.000459 | 0.001764 |
| PCDH18   | -0.06796 | 0.367401 | 0.481012 |
| PCDH19   | -0.12425 | 0.09845  | 0.168389 |
| PCDH1    | 0.56042  | 4.14E-16 | 4.22E-14 |
| PCDH20   | 0.135402 | 0.071534 | 0.129622 |
| PCDH7    | 0.276566 | 0.000186 | 0.000814 |
| PCDH8    | -0.20941 | 0.005027 | 0.013757 |
| PCDH9    | -0.20047 | 0.007296 | 0.018874 |
| PCDHA10  | 0.049601 | 0.510856 | 0.617159 |
| PCDHA11  | -0.18974 | 0.011188 | 0.027199 |
| PCDHA12  | -0.05552 | 0.461723 | 0.571997 |
| PCDHA13  | -0.13005 | 0.083599 | 0.147374 |
| PCDHA1   | -0.37056 | 3.55E-07 | 3.54E-06 |
| PCDHA2   | -0.26932 | 0.000278 | 0.001148 |
| PCDHA3   | -0.27357 | 0.00022  | 0.000939 |
| PCDHA4   | -0.17559 | 0.019058 | 0.04263  |
| PCDHA5   | -0.30687 | 3.10E-05 | 0.000174 |
| PCDHA6   | -0.22485 | 0.002549 | 0.007688 |
| PCDHA7   | -0.20869 | 0.005182 | 0.014117 |
| PCDHA8   | -0.33877 | 3.74E-06 | 2.75E-05 |
| PCDHA9   | -0.17695 | 0.018138 | 0.040868 |
| PCDHAC1  | -0.12184 | 0.105205 | 0.178034 |
| PCDHAC2  | -0.09187 | 0.222592 | 0.324621 |
| PCDHB10  | -0.00862 | 0.909067 | 0.936391 |
| PCDHB11  | -0.10365 | 0.168572 | 0.259648 |
| PCDHB12  | -0.09109 | 0.226557 | 0.329141 |
| PCDHB13  | -0.04095 | 0.587328 | 0.685747 |
| PCDHB14  | 0.124409 | 0.098014 | 0.167877 |
| PCDHB15  | -0.10999 | 0.143872 | 0.228379 |
| PCDHB16  | -0.07385 | 0.327216 | 0.439116 |
| PCDHB17  | -0.08253 | 0.273458 | 0.381525 |
| PCDHB18  | -0.10512 | 0.162588 | 0.252098 |
| PCDHB19P | -0.0172  | 0.819693 | 0.872322 |
| PCDHB1   | -0.40983 | 1.34E-08 | 2.03E-07 |
| PCDHB2   | 0.112557 | 0.134686 | 0.216756 |
| PCDHB3   | -0.19295 | 0.009866 | 0.024407 |
| PCDHB4   | -0.21466 | 0.00401  | 0.011349 |
| PCDHB5   | -0.28814 | 9.61E-05 | 0.000459 |
| PCDHB6   | -0.19976 | 0.007509 | 0.019358 |
| PCDHB7   | -0.03354 | 0.656683 | 0.745422 |

|          |          |          |          |
|----------|----------|----------|----------|
| PCDHB8   | -0.03601 | 0.633194 | 0.725002 |
| PCDHB9   | 0.293809 | 6.88E-05 | 0.000344 |
| PCDHGA10 | 0.026238 | 0.728104 | 0.803158 |
| PCDHGA11 | -0.10682 | 0.155845 | 0.2439   |
| PCDHGA12 | -0.23683 | 0.001458 | 0.004751 |
| PCDHGA1  | -0.19008 | 0.011041 | 0.026884 |
| PCDHGA2  | -0.27446 | 0.000209 | 0.0009   |
| PCDHGA3  | -0.20827 | 0.005276 | 0.014331 |
| PCDHGA4  | -0.13733 | 0.067564 | 0.123448 |
| PCDHGA5  | -0.1785  | 0.017134 | 0.038961 |
| PCDHGA6  | -0.27955 | 0.000157 | 0.000706 |
| PCDHGA7  | -0.21764 | 0.003519 | 0.010119 |
| PCDHGA8  | -0.01307 | 0.862513 | 0.904504 |
| PCDHGA9  | -0.15356 | 0.040713 | 0.080895 |
| PCDHGB1  | -0.14453 | 0.054262 | 0.102805 |
| PCDHGB2  | -0.01121 | 0.881962 | 0.917987 |
| PCDHGB3  | -0.1931  | 0.00981  | 0.024291 |
| PCDHGB4  | -0.15855 | 0.034532 | 0.070486 |
| PCDHGB5  | -0.04479 | 0.552759 | 0.654754 |
| PCDHGB6  | -0.23075 | 0.001943 | 0.006082 |
| PCDHGB7  | -0.0245  | 0.745492 | 0.816787 |
| PCDHGB8P | 0.030745 | 0.683719 | 0.76813  |
| PCDHGC3  | 0.105046 | 0.162873 | 0.252462 |
| PCDHGC4  | -0.11836 | 0.115582 | 0.191754 |
| PCDHGC5  | 0.1407   | 0.06103  | 0.11322  |
| PCDP1    | 0.076563 | 0.309738 | 0.420223 |
| PCF11    | -0.19344 | 0.009678 | 0.024027 |
| PCGEM1   | -0.23916 | 0.001304 | 0.004315 |
| PCGF1    | 0.245661 | 0.000949 | 0.003282 |
| PCGF2    | 0.145116 | 0.053275 | 0.101206 |
| PCGF3    | 0.088173 | 0.241854 | 0.346351 |
| PCGF5    | -0.24456 | 0.001002 | 0.003439 |
| PCGF6    | -0.11239 | 0.135279 | 0.217513 |
| PCID2    | 0.08327  | 0.269138 | 0.376748 |
| PCIF1    | -0.11555 | 0.124566 | 0.203333 |
| PCK1     | -0.10716 | 0.154533 | 0.242211 |
| PCK2     | -0.07636 | 0.31105  | 0.421744 |
| PCLO     | -0.31487 | 1.86E-05 | 0.000111 |
| PCM1     | -0.25279 | 0.000663 | 0.002411 |
| PCMT1    | -0.39914 | 3.41E-08 | 4.55E-07 |
| PCMTD1   | -0.19598 | 0.00875  | 0.022026 |
| PCMTD2   | -0.29692 | 5.71E-05 | 0.000293 |
| PCNAP1   | -0.06467 | 0.391085 | 0.503766 |
| PCNA     | 0.087922 | 0.243199 | 0.347824 |
| PCNP     | -0.23697 | 0.001449 | 0.004728 |
| PCNT     | -0.25737 | 0.000524 | 0.001978 |
| PCNXL2   | 0.01399  | 0.852959 | 0.897166 |
| PCNXL3   | 0.111341 | 0.138975 | 0.222193 |
| PCNX     | -0.37419 | 2.67E-07 | 2.76E-06 |
| PCOLCE2  | 0.227623 | 0.002245 | 0.006897 |
| PCOLCE   | 0.205483 | 0.00593  | 0.015824 |
| PCOTH    | 0.170912 | 0.022549 | 0.049116 |
| PCP2     | 0.082384 | 0.274282 | 0.382351 |
| PCP4L1   | 0.007486 | 0.921004 | 0.945338 |

|          |          |          |          |
|----------|----------|----------|----------|
| PCP4     | -0.20704 | 0.005555 | 0.014961 |
| PCSK1N   | -0.15536 | 0.038383 | 0.076952 |
| PCSK1    | -0.41345 | 9.70E-09 | 1.54E-07 |
| PCSK2    | -0.16757 | 0.025366 | 0.054283 |
| PCSK4    | 0.235438 | 0.001558 | 0.005034 |
| PCSK5    | 0.25561  | 0.000574 | 0.002139 |
| PCSK6    | 0.51024  | 3.46E-13 | 1.80E-11 |
| PCSK7    | 0.391175 | 6.71E-08 | 8.23E-07 |
| PCSK9    | 0.317288 | 1.59E-05 | 9.73E-05 |
| PCTP     | 0.231774 | 0.001852 | 0.005841 |
| PCYOX1L  | -0.09368 | 0.213581 | 0.31426  |
| PCYOX1   | -0.2729  | 0.000228 | 0.000969 |
| PCYT1A   | 0.031504 | 0.676347 | 0.76223  |
| PCYT1B   | -0.18932 | 0.011376 | 0.02757  |
| PCYT2    | 0.42297  | 4.06E-09 | 7.25E-08 |
| PC       | 0.121126 | 0.107272 | 0.180866 |
| PDAP1    | 0.165346 | 0.027408 | 0.057991 |
| PDCD10   | 0.330123 | 6.79E-06 | 4.63E-05 |
| PDCD11   | -0.0983  | 0.191773 | 0.287652 |
| PDCD1LG2 | -0.02832 | 0.707469 | 0.786988 |
| PDCD1    | -0.01577 | 0.834478 | 0.882688 |
| PDCD2L   | 0.087589 | 0.244996 | 0.349863 |
| PDCD2    | -0.1448  | 0.053795 | 0.102076 |
| PDCD4    | -0.39121 | 6.69E-08 | 8.21E-07 |
| PDCD5    | 0.171521 | 0.022065 | 0.048198 |
| PDCD6IP  | 0.318278 | 1.49E-05 | 9.21E-05 |
| PDCD6    | 0.15447  | 0.039519 | 0.078928 |
| PDCD7    | -0.16236 | 0.030369 | 0.063332 |
| PDCL2    | 0.200401 | 0.007316 | 0.018918 |
| PDCL3    | 0.049622 | 0.510681 | 0.617061 |
| PDCL     | -0.30459 | 3.57E-05 | 0.000196 |
| PDC      | 0.053277 | 0.480006 | 0.589506 |
| PDDC1    | 0.25687  | 0.000538 | 0.002024 |
| PDE10A   | -0.39956 | 3.29E-08 | 4.41E-07 |
| PDE11A   | 0.241415 | 0.001169 | 0.003927 |
| PDE12    | -0.1584  | 0.034702 | 0.070749 |
| PDE1A    | -0.11396 | 0.129856 | 0.210283 |
| PDE1B    | -0.03573 | 0.635859 | 0.727524 |
| PDE1C    | -0.47012 | 3.57E-11 | 1.14E-09 |
| PDE2A    | -0.30534 | 3.41E-05 | 0.000189 |
| PDE3A    | -0.22812 | 0.002194 | 0.006759 |
| PDE3B    | -0.35632 | 1.05E-06 | 9.08E-06 |
| PDE4A    | 0.394706 | 4.98E-08 | 6.37E-07 |
| PDE4B    | -0.30668 | 3.13E-05 | 0.000175 |
| PDE4C    | 0.6364   | 1.34E-21 | 6.82E-19 |
| PDE4DIP  | -0.33723 | 4.16E-06 | 3.03E-05 |
| PDE4D    | -0.14967 | 0.046142 | 0.089841 |
| PDE5A    | -0.16035 | 0.032507 | 0.066992 |
| PDE6A    | 0.128816 | 0.086591 | 0.151702 |
| PDE6B    | -0.10061 | 0.181491 | 0.275172 |
| PDE6C    | -0.20807 | 0.00532  | 0.014438 |
| PDE6D    | 0.214604 | 0.00402  | 0.011373 |
| PDE6G    | 0.00743  | 0.921591 | 0.945646 |
| PDE6H    | -0.10176 | 0.176493 | 0.269018 |

|        |          |          |          |
|--------|----------|----------|----------|
| PDE7A  | 0.105447 | 0.161262 | 0.250435 |
| PDE7B  | -0.29388 | 6.85E-05 | 0.000343 |
| PDE8A  | -0.25088 | 0.000731 | 0.002628 |
| PDE8B  | -0.24064 | 0.001214 | 0.00406  |
| PDE9A  | -0.12585 | 0.094167 | 0.162285 |
| PDF    | 0.270042 | 0.000267 | 0.00111  |
| PDGFA  | -0.11061 | 0.141592 | 0.225557 |
| PDGFB  | 0.111916 | 0.136935 | 0.219624 |
| PDGFC  | 0.341374 | 3.11E-06 | 2.35E-05 |
| PDGFD  | -0.14803 | 0.048619 | 0.093777 |
| PDGFRA | -0.06307 | 0.402944 | 0.515617 |
| PDGFRB | 0.151087 | 0.044102 | 0.086583 |
| PDGFRL | -0.10939 | 0.146072 | 0.231333 |
| PDHA1  | -0.11756 | 0.1181   | 0.194967 |
| PDHB   | -0.04949 | 0.511781 | 0.617952 |
| PDHX   | -0.18932 | 0.011373 | 0.027567 |
| PDIA2  | 0.005193 | 0.945152 | 0.963075 |
| PDIA3P | 0.005389 | 0.943086 | 0.961713 |
| PDIA3  | 0.062293 | 0.408779 | 0.520892 |
| PDIA4  | 0.029852 | 0.692433 | 0.774673 |
| PDIA5  | -0.0504  | 0.504105 | 0.611132 |
| PDIA6  | -0.03977 | 0.598121 | 0.694944 |
| PDIK1L | -0.28702 | 0.000103 | 0.000486 |
| PDILT  | -0.07792 | 0.301206 | 0.411386 |
| PDK1   | 0.180435 | 0.015946 | 0.036711 |
| PDK2   | -0.23205 | 0.001829 | 0.005774 |
| PDK3   | -0.34413 | 2.56E-06 | 1.97E-05 |
| PDK4   | -0.3962  | 4.39E-08 | 5.68E-07 |
| PDLIM1 | 0.392101 | 6.21E-08 | 7.68E-07 |
| PDLIM2 | 0.358202 | 9.14E-07 | 8.02E-06 |
| PDLIM3 | 0.091474 | 0.224611 | 0.326794 |
| PDLIM4 | 0.28411  | 0.000121 | 0.000563 |
| PDLIM5 | 0.096226 | 0.201341 | 0.299428 |
| PDLIM7 | 0.550975 | 1.60E-15 | 1.38E-13 |
| PDP1   | 0.16354  | 0.029167 | 0.061164 |
| PDP2   | -0.21238 | 0.004426 | 0.012318 |
| PDPK1  | -0.367   | 4.68E-07 | 4.49E-06 |
| PDPN   | 0.178435 | 0.017172 | 0.039039 |
| PDPR   | -0.2229  | 0.002785 | 0.00829  |
| PDRG1  | -0.05326 | 0.480173 | 0.589675 |
| PDS5A  | -0.35496 | 1.16E-06 | 9.90E-06 |
| PDS5B  | -0.21551 | 0.003864 | 0.010986 |
| PDSS1  | 0.080431 | 0.285857 | 0.39484  |
| PDSS2  | -0.28522 | 0.000114 | 0.000533 |
| PDX1   | -0.01126 | 0.881418 | 0.917683 |
| PDXDC1 | -0.03256 | 0.666117 | 0.753579 |
| PDXDC2 | 0.186084 | 0.012885 | 0.030649 |
| PDXK   | 0.181607 | 0.015263 | 0.035345 |
| PDXP   | -0.47193 | 2.93E-11 | 9.48E-10 |
| PDYN   | 0.010608 | 0.888235 | 0.92238  |
| PDZD11 | 0.299064 | 5.01E-05 | 0.000263 |
| PDZD2  | -0.28232 | 0.000135 | 0.000616 |
| PDZD3  | 0.454115 | 1.93E-10 | 5.03E-09 |
| PDZD4  | -0.2554  | 0.00058  | 0.002158 |

|          |          |          |          |
|----------|----------|----------|----------|
| PDZD7    | 0.305511 | 3.37E-05 | 0.000187 |
| PDZD8    | 0.030027 | 0.690718 | 0.773659 |
| PDZD9    | 0.018969 | 0.801572 | 0.860308 |
| PDZK1IP1 | 0.516058 | 1.68E-13 | 9.47E-12 |
| PDZK1P1  | -0.09468 | 0.208724 | 0.308376 |
| PDZK1    | -0.10212 | 0.174967 | 0.26731  |
| PDZRN3   | -0.19766 | 0.008176 | 0.02083  |
| PDZRN4   | -0.05436 | 0.471113 | 0.581147 |
| PEA15    | 0.267717 | 0.000303 | 0.001237 |
| PEAR1    | 0.078707 | 0.296347 | 0.406265 |
| PEBP1    | -0.20762 | 0.005421 | 0.014659 |
| PEBP4    | -0.19215 | 0.010184 | 0.025079 |
| PECAM1   | -0.15696 | 0.036409 | 0.073682 |
| PECI     | -0.24855 | 0.000822 | 0.002908 |
| PECR     | 0.263592 | 0.000378 | 0.001495 |
| PEF1     | 0.040486 | 0.591573 | 0.689076 |
| PEG10    | -0.3941  | 5.24E-08 | 6.64E-07 |
| PEG3AS   | -0.198   | 0.008065 | 0.020587 |
| PEG3     | -0.34488 | 2.43E-06 | 1.88E-05 |
| PELI1    | 0.379882 | 1.70E-07 | 1.86E-06 |
| PELI2    | -0.08965 | 0.234033 | 0.338039 |
| PELI3    | -0.25978 | 0.000462 | 0.001774 |
| PELO     | 0.037139 | 0.622592 | 0.716555 |
| PELP1    | -0.28297 | 0.00013  | 0.000596 |
| PEMT     | -0.30268 | 4.02E-05 | 0.000217 |
| PENK     | -0.24677 | 0.000898 | 0.003134 |
| PEPD     | -0.03144 | 0.67697  | 0.762584 |
| PER1     | -0.08636 | 0.251681 | 0.357557 |
| PER2     | -0.11864 | 0.114733 | 0.190618 |
| PER3     | -0.0652  | 0.387222 | 0.499947 |
| PER4     | 0.06867  | 0.362407 | 0.475624 |
| PERP     | 0.465491 | 5.87E-11 | 1.76E-09 |
| PES1     | 0.069169 | 0.358922 | 0.472053 |
| PET112L  | -0.13958 | 0.063129 | 0.116534 |
| PEX10    | -0.02473 | 0.743147 | 0.81503  |
| PEX11A   | 0.123603 | 0.100225 | 0.170894 |
| PEX11B   | 0.340485 | 3.31E-06 | 2.48E-05 |
| PEX11G   | 0.155472 | 0.038241 | 0.076723 |
| PEX12    | -0.24004 | 0.00125  | 0.004167 |
| PEX13    | 0.334523 | 5.02E-06 | 3.58E-05 |
| PEX14    | 0.228617 | 0.002145 | 0.006631 |
| PEX16    | 0.167885 | 0.025091 | 0.0538   |
| PEX19    | -0.07153 | 0.342684 | 0.454965 |
| PEX1     | -0.23946 | 0.001285 | 0.004268 |
| PEX26    | -0.10148 | 0.177714 | 0.270463 |
| PEX2     | 0.040771 | 0.588957 | 0.686961 |
| PEX3     | -0.36397 | 5.91E-07 | 5.50E-06 |
| PEX5L    | -0.31484 | 1.87E-05 | 0.000112 |
| PEX5     | -0.36011 | 7.92E-07 | 7.11E-06 |
| PEX6     | -0.26752 | 0.000306 | 0.001249 |
| PEX7     | -0.25747 | 0.000521 | 0.001969 |
| PF4V1    | 0.099306 | 0.187226 | 0.282202 |
| PF4      | 0.181225 | 0.015483 | 0.035782 |
| PFAS     | -0.41704 | 7.00E-09 | 1.16E-07 |

|         |          |          |          |
|---------|----------|----------|----------|
| PFDN1   | 0.318166 | 1.50E-05 | 9.26E-05 |
| PFDN2   | 0.366857 | 4.74E-07 | 4.53E-06 |
| PFDN4   | 0.195621 | 0.008874 | 0.022275 |
| PFDN5   | -0.05764 | 0.444723 | 0.556266 |
| PFDN6   | 0.274446 | 0.00021  | 0.0009   |
| PFKFB1  | -0.05377 | 0.47596  | 0.585629 |
| PFKFB2  | 0.019269 | 0.798496 | 0.858164 |
| PFKFB3  | 0.110163 | 0.143231 | 0.227608 |
| PFKFB4  | -0.18872 | 0.011641 | 0.02811  |
| PFKL    | 0.267295 | 0.00031  | 0.001262 |
| PFKM    | -0.34924 | 1.77E-06 | 1.43E-05 |
| PFKP    | 0.314497 | 1.91E-05 | 0.000114 |
| PFN1    | 0.28795  | 9.72E-05 | 0.000463 |
| PFN2    | -0.29761 | 5.47E-05 | 0.000283 |
| PFN3    | 0.090613 | 0.22902  | 0.332061 |
| PFN4    | 0.02797  | 0.710924 | 0.789543 |
| PGA3    | -0.10232 | 0.174114 | 0.266419 |
| PGA4    | -0.10897 | 0.147644 | 0.233262 |
| PGA5    | -0.1244  | 0.098037 | 0.167892 |
| PGAM1   | 0.254026 | 0.000623 | 0.002287 |
| PGAM2   | -0.17278 | 0.02109  | 0.046436 |
| PGAM4   | 0.01202  | 0.873477 | 0.912566 |
| PGAM5   | -0.16474 | 0.027993 | 0.059049 |
| PGAP1   | -0.40741 | 1.66E-08 | 2.43E-07 |
| PGAP2   | 0.159177 | 0.033814 | 0.069239 |
| PGAP3   | 0.186474 | 0.012694 | 0.030271 |
| PGBD1   | -0.25748 | 0.000521 | 0.001968 |
| PGBD2   | -0.04084 | 0.588311 | 0.686496 |
| PGBD3   | -0.2486  | 0.00082  | 0.002903 |
| PGBD4   | -0.03945 | 0.601087 | 0.697448 |
| PGBD5   | -0.36052 | 7.68E-07 | 6.93E-06 |
| PGCP    | -0.2127  | 0.004366 | 0.012179 |
| PGC     | 0.213033 | 0.004303 | 0.012036 |
| PGD     | 0.097826 | 0.193915 | 0.290447 |
| PGF     | 0.073567 | 0.329105 | 0.441082 |
| PGGT1B  | -0.03088 | 0.682442 | 0.766968 |
| PGK1    | 0.245576 | 0.000953 | 0.003294 |
| PGK2    | 0.06498  | 0.388827 | 0.501353 |
| PGLS    | 0.285269 | 0.000114 | 0.000532 |
| PGLYRP1 | -0.07938 | 0.292195 | 0.401827 |
| PGLYRP2 | -0.00031 | 0.996768 | 0.997537 |
| PGLYRP3 | 0.178071 | 0.017404 | 0.039478 |
| PGLYRP4 | 0.095206 | 0.206182 | 0.305327 |
| PGM1    | 0.182403 | 0.014814 | 0.034483 |
| PGM2L1  | 0.323574 | 1.05E-05 | 6.81E-05 |
| PGM2    | 0.173834 | 0.020309 | 0.044994 |
| PGM3    | -0.29175 | 7.77E-05 | 0.000382 |
| PGM5P2  | -0.08261 | 0.272961 | 0.381074 |
| PGM5    | -0.22946 | 0.002063 | 0.0064   |
| PGPEP1L | -0.03259 | 0.665837 | 0.753347 |
| PGPEP1  | -0.19316 | 0.009787 | 0.024246 |
| PGP     | 0.095818 | 0.203268 | 0.301916 |
| PGRMC1  | -0.02543 | 0.736171 | 0.809354 |
| PGRMC2  | -0.16952 | 0.023685 | 0.051274 |



|          |          |          |          |
|----------|----------|----------|----------|
| PGR      | -0.13385 | 0.074879 | 0.134581 |
| PGS1     | -0.14512 | 0.05327  | 0.101206 |
| PHACTR1  | -0.39038 | 7.17E-08 | 8.71E-07 |
| PHACTR2  | -0.04998 | 0.50761  | 0.614364 |
| PHACTR3  | 0.348509 | 1.87E-06 | 1.50E-05 |
| PHACTR4  | -0.18005 | 0.016176 | 0.037164 |
| PHAX     | -0.24263 | 0.001102 | 0.003733 |
| PHB2     | -0.16728 | 0.025626 | 0.054764 |
| PHB      | 0.228468 | 0.00216  | 0.006673 |
| PHC1     | -0.13806 | 0.06609  | 0.121231 |
| PHC2     | 0.12371  | 0.09993  | 0.170507 |
| PHC3     | -0.07749 | 0.303894 | 0.414284 |
| PHEX     | -0.29884 | 5.08E-05 | 0.000266 |
| PHF10    | -0.41996 | 5.36E-09 | 9.17E-08 |
| PHF11    | 0.422178 | 4.37E-09 | 7.70E-08 |
| PHF12    | -0.10257 | 0.173059 | 0.265092 |
| PHF13    | 0.14824  | 0.048295 | 0.093242 |
| PHF14    | 0.006965 | 0.926484 | 0.948943 |
| PHF15    | -0.30501 | 3.48E-05 | 0.000191 |
| PHF16    | -0.22501 | 0.00253  | 0.007641 |
| PHF17    | -0.33856 | 3.79E-06 | 2.79E-05 |
| PHF19    | -0.03645 | 0.629111 | 0.721831 |
| PHF1     | 0.051043 | 0.49863  | 0.606055 |
| PHF20L1  | -0.11996 | 0.110724 | 0.1855   |
| PHF20    | -0.25382 | 0.000629 | 0.002308 |
| PHF21A   | -0.21897 | 0.003319 | 0.00962  |
| PHF21B   | -0.24883 | 0.00081  | 0.002878 |
| PHF23    | -0.16498 | 0.027753 | 0.0586   |
| PHF2     | -0.3763  | 2.26E-07 | 2.39E-06 |
| PHF3     | -0.29752 | 5.50E-05 | 0.000284 |
| PHF5A    | 0.162126 | 0.030609 | 0.063746 |
| PHF6     | -0.04726 | 0.530992 | 0.635237 |
| PHF7     | -0.19659 | 0.008536 | 0.021589 |
| PHF8     | -0.35163 | 1.49E-06 | 1.22E-05 |
| PHGDH    | 0.025889 | 0.731575 | 0.805959 |
| PHGR1    | 0.260743 | 0.000439 | 0.001703 |
| PHIP     | -0.33721 | 4.17E-06 | 3.03E-05 |
| PHKA1    | -0.20119 | 0.007084 | 0.018411 |
| PHKA2    | -0.2426  | 0.001103 | 0.003736 |
| PHKB     | -0.08837 | 0.240782 | 0.345203 |
| PHKG1    | -0.05042 | 0.503922 | 0.610985 |
| PHKG2    | 0.34151  | 3.08E-06 | 2.33E-05 |
| PHLDA1   | 0.288671 | 9.32E-05 | 0.000446 |
| PHLDA2   | 0.597254 | 1.37E-18 | 2.92E-16 |
| PHLDA3   | 0.51789  | 1.33E-13 | 7.62E-12 |
| PHLDB1   | 0.218005 | 0.003463 | 0.009981 |
| PHLDB2   | -0.25577 | 0.000569 | 0.002124 |
| PHLDB3   | -0.16005 | 0.032835 | 0.067563 |
| PHLPP1   | -0.26838 | 0.000292 | 0.001201 |
| PHLPP2   | -0.41741 | 6.77E-09 | 1.13E-07 |
| PHOSPH01 | 0.033915 | 0.653126 | 0.742151 |
| PHOSPH02 | -0.12462 | 0.097453 | 0.167031 |
| PHOX2A   | -0.06961 | 0.355878 | 0.468955 |
| PHOX2B   | -0.1189  | 0.113946 | 0.189629 |

|         |          |          |          |
|---------|----------|----------|----------|
| PHPT1   | -0.10168 | 0.176839 | 0.269419 |
| PHRF1   | 0.055373 | 0.46287  | 0.57316  |
| PHTF1   | -0.07287 | 0.33374  | 0.445933 |
| PHTF2   | -0.25023 | 0.000755 | 0.002706 |
| PHYHD1  | 0.270372 | 0.000262 | 0.001093 |
| PHYHIPL | -0.26855 | 0.00029  | 0.001192 |
| PHYHIP  | 0.26159  | 0.00042  | 0.001638 |
| PHYH    | -0.10636 | 0.157662 | 0.246024 |
| PI15    | 0.050865 | 0.500134 | 0.607285 |
| PI16    | -0.09865 | 0.190147 | 0.285712 |
| PI3     | 0.474877 | 2.13E-11 | 7.03E-10 |
| PI4K2A  | -0.10699 | 0.155196 | 0.243058 |
| PI4K2B  | -0.15978 | 0.033132 | 0.068117 |
| PI4KAP1 | -0.10525 | 0.162043 | 0.25149  |
| PI4KAP2 | -0.01633 | 0.828748 | 0.878883 |
| PI4KA   | -0.5005  | 1.13E-12 | 5.15E-11 |
| PI4KB   | -0.21664 | 0.003678 | 0.010523 |
| PIAS1   | -0.02523 | 0.738193 | 0.811037 |
| PIAS2   | -0.51059 | 3.31E-13 | 1.75E-11 |
| PIAS3   | 0.389592 | 7.65E-08 | 9.25E-07 |
| PIAS4   | -0.24711 | 0.000883 | 0.003092 |
| PIBF1   | 0.204987 | 0.006055 | 0.016098 |
| PICALM  | 0.202385 | 0.006744 | 0.017689 |
| PICK1   | 0.027273 | 0.717819 | 0.795014 |
| PID1    | -0.20955 | 0.004996 | 0.013687 |
| PIF1    | 0.352114 | 1.44E-06 | 1.19E-05 |
| PIGA    | 0.126867 | 0.091503 | 0.158537 |
| PIGB    | 0.369224 | 3.94E-07 | 3.88E-06 |
| PIGC    | 0.323299 | 1.07E-05 | 6.91E-05 |
| PIGF    | 0.028867 | 0.702087 | 0.782541 |
| PIGG    | 0.010981 | 0.884337 | 0.919685 |
| PIGH    | -0.08694 | 0.248515 | 0.353943 |
| PIGK    | -0.3804  | 1.63E-07 | 1.80E-06 |
| PIGL    | -0.003   | 0.968324 | 0.978318 |
| PIGM    | -0.08603 | 0.253526 | 0.359732 |
| PIGN    | -0.31702 | 1.62E-05 | 9.86E-05 |
| PIGO    | -0.09372 | 0.213382 | 0.314038 |
| PIGP    | -0.25513 | 0.000588 | 0.002184 |
| PIGQ    | 0.146071 | 0.051708 | 0.098771 |
| PIGR    | 0.258029 | 0.000506 | 0.001922 |
| PIGS    | 0.164582 | 0.02814  | 0.059304 |
| PIGT    | -0.25694 | 0.000536 | 0.002018 |
| PIGU    | -0.05025 | 0.505299 | 0.612129 |
| PIGV    | -0.01703 | 0.821527 | 0.873615 |
| PIGW    | 0.085091 | 0.25877  | 0.365115 |
| PIGX    | -0.1669  | 0.025973 | 0.055416 |
| PIGY    | -0.19673 | 0.008489 | 0.021486 |
| PIGZ    | -0.08594 | 0.254028 | 0.360211 |
| PIH1D1  | 0.254077 | 0.000621 | 0.002282 |
| PIH1D2  | 0.029722 | 0.693705 | 0.775647 |
| PIK3AP1 | 0.01107  | 0.883401 | 0.919001 |
| PIK3C2A | -0.20079 | 0.007201 | 0.018644 |
| PIK3C2B | 0.294108 | 6.76E-05 | 0.000339 |
| PIK3C2G | 0.433726 | 1.47E-09 | 2.94E-08 |

|          |          |          |          |
|----------|----------|----------|----------|
| PIK3C3   | -0.37021 | 3.65E-07 | 3.62E-06 |
| PIK3CA   | -0.05042 | 0.503871 | 0.610985 |
| PIK3CB   | 0.104834 | 0.163726 | 0.253564 |
| PIK3CD   | -0.02798 | 0.710839 | 0.789492 |
| PIK3CG   | -0.0206  | 0.784873 | 0.847443 |
| PIK3IP1  | 0.105232 | 0.162126 | 0.251539 |
| PIK3R1   | -0.20855 | 0.005214 | 0.014189 |
| PIK3R2   | -0.10363 | 0.168656 | 0.259755 |
| PIK3R3   | -0.30886 | 2.73E-05 | 0.000155 |
| PIK3R4   | -0.1188  | 0.114242 | 0.189993 |
| PIK3R5   | -0.03271 | 0.664729 | 0.752612 |
| PIK3R6   | 0.216129 | 0.003761 | 0.010738 |
| PIKFYVE  | -0.32323 | 1.08E-05 | 6.94E-05 |
| PILRA    | 0.069362 | 0.357575 | 0.470652 |
| PILRB    | 0.005232 | 0.944739 | 0.962704 |
| PIM1     | 0.310992 | 2.39E-05 | 0.000138 |
| PIM2     | -0.15538 | 0.038352 | 0.076899 |
| PIM3     | 0.277877 | 0.000173 | 0.000764 |
| PIN1L    | -0.11136 | 0.138912 | 0.222129 |
| PIN1     | 0.047213 | 0.531439 | 0.635618 |
| PIN4     | 0.128242 | 0.088015 | 0.153666 |
| PINK1    | -0.11183 | 0.137254 | 0.220012 |
| PINX1    | 0.102433 | 0.173646 | 0.265846 |
| PION     | 0.025294 | 0.737517 | 0.810474 |
| PIP4K2A  | 0.047013 | 0.533181 | 0.637162 |
| PIP4K2B  | -0.23922 | 0.0013   | 0.004307 |
| PIP4K2C  | 0.130928 | 0.08151  | 0.144476 |
| PIP5K1A  | -0.01686 | 0.823272 | 0.874812 |
| PIP5K1B  | -0.09489 | 0.20769  | 0.307078 |
| PIP5K1C  | -0.07587 | 0.314128 | 0.425129 |
| PIP5K1P1 | -0.00295 | 0.968787 | 0.97861  |
| PIP5KL1  | 0.228092 | 0.002197 | 0.006766 |
| PIPOX    | -0.33437 | 5.08E-06 | 3.61E-05 |
| PIPSL    | 0.158764 | 0.034285 | 0.070088 |
| PIP      | 0.0895   | 0.234814 | 0.338787 |
| PIRT     | -0.17796 | 0.017476 | 0.039602 |
| PIR      | -0.19994 | 0.007454 | 0.019234 |
| PISD     | -0.32001 | 1.33E-05 | 8.34E-05 |
| PITPNA   | -0.43515 | 1.28E-09 | 2.61E-08 |
| PITPNB   | 0.161115 | 0.031677 | 0.065515 |
| PITPNC1  | -0.06498 | 0.388822 | 0.501353 |
| PITPNM1  | 0.364441 | 5.70E-07 | 5.33E-06 |
| PITPNM2  | -0.26232 | 0.000404 | 0.001584 |
| PITPNM3  | 0.416216 | 7.55E-09 | 1.24E-07 |
| PITRM1   | -0.10554 | 0.160889 | 0.249994 |
| PITX1    | 0.664458 | 4.91E-24 | 4.85E-21 |
| PITX2    | 0.009741 | 0.897317 | 0.928496 |
| PITX3    | 0.114766 | 0.127152 | 0.206802 |
| PIWIL1   | 0.066039 | 0.381129 | 0.493869 |
| PIWIL2   | -0.05887 | 0.43502  | 0.546581 |
| PIWIL3   | -0.06331 | 0.401194 | 0.513909 |
| PIWIL4   | 0.264657 | 0.000357 | 0.001427 |
| PJA1     | 0.056391 | 0.454674 | 0.565703 |
| PJA2     | -0.35063 | 1.60E-06 | 1.31E-05 |

|          |          |          |          |
|----------|----------|----------|----------|
| PKD1L1   | -0.15545 | 0.038269 | 0.076762 |
| PKD1L2   | 0.349716 | 1.71E-06 | 1.38E-05 |
| PKD1L3   | -0.23399 | 0.001669 | 0.005342 |
| PKD1     | -0.25246 | 0.000675 | 0.002448 |
| PKD2L1   | 0.066093 | 0.380735 | 0.493488 |
| PKD2L2   | 0.073322 | 0.330725 | 0.442764 |
| PKD2     | -0.15288 | 0.041623 | 0.082429 |
| PKDCC    | 0.074408 | 0.323594 | 0.435586 |
| PKDREJ   | -0.02069 | 0.784028 | 0.846763 |
| PKHD1L1  | -0.31033 | 2.49E-05 | 0.000143 |
| PKHD1    | 0.155348 | 0.038398 | 0.076975 |
| PKIA     | 0.15554  | 0.038156 | 0.076599 |
| PKIB     | -0.08843 | 0.240504 | 0.344893 |
| PKIG     | -0.27242 | 0.000234 | 0.000992 |
| PKLR     | -0.05905 | 0.433659 | 0.545239 |
| PKM2     | 0.571575 | 7.93E-17 | 1.00E-14 |
| PKMYT1   | 0.431643 | 1.79E-09 | 3.51E-08 |
| PKN1     | 0.221053 | 0.003025 | 0.00891  |
| PKN2     | 0.109125 | 0.147061 | 0.232583 |
| PKN3     | 0.388501 | 8.38E-08 | 1.00E-06 |
| PKNOX1   | -0.22089 | 0.003047 | 0.008958 |
| PKNOX2   | -0.07653 | 0.30992  | 0.420385 |
| PKP1     | 0.342099 | 2.96E-06 | 2.25E-05 |
| PKP2     | 0.169515 | 0.023693 | 0.051287 |
| PKP3     | 0.548639 | 2.23E-15 | 1.87E-13 |
| PKP4     | 0.24393  | 0.001034 | 0.003531 |
| PL-5283  | -0.10274 | 0.172364 | 0.264171 |
| PLA1A    | -0.24205 | 0.001134 | 0.003828 |
| PLA2G10  | 0.484292 | 7.43E-12 | 2.76E-10 |
| PLA2G12A | -0.48243 | 9.17E-12 | 3.33E-10 |
| PLA2G12B | -0.07433 | 0.324099 | 0.436116 |
| PLA2G15  | 0.264367 | 0.000363 | 0.001446 |
| PLA2G16  | 0.58159  | 1.70E-17 | 2.57E-15 |
| PLA2G1B  | -0.11297 | 0.133237 | 0.214703 |
| PLA2G2A  | -0.18282 | 0.014581 | 0.034041 |
| PLA2G2C  | -0.01122 | 0.881829 | 0.917938 |
| PLA2G2D  | -0.08545 | 0.256747 | 0.363156 |
| PLA2G2F  | 0.326205 | 8.85E-06 | 5.83E-05 |
| PLA2G3   | 0.216599 | 0.003684 | 0.010536 |
| PLA2G4A  | 0.271663 | 0.000244 | 0.001026 |
| PLA2G4C  | -0.28013 | 0.000152 | 0.000686 |
| PLA2G4D  | 0.369824 | 3.76E-07 | 3.73E-06 |
| PLA2G4E  | 0.178182 | 0.017333 | 0.039338 |
| PLA2G4F  | 0.358022 | 9.27E-07 | 8.11E-06 |
| PLA2G5   | -0.12497 | 0.096502 | 0.165688 |
| PLA2G6   | -0.16226 | 0.030469 | 0.063487 |
| PLA2G7   | 0.090539 | 0.229404 | 0.332495 |
| PLA2R1   | 0.376907 | 2.15E-07 | 2.29E-06 |
| PLAA     | -0.20996 | 0.00491  | 0.013488 |
| PLAC1L   | 0.010774 | 0.886504 | 0.921067 |
| PLAC1    | 0.312667 | 2.15E-05 | 0.000126 |
| PLAC2    | -0.12863 | 0.08704  | 0.152312 |
| PLAC4    | 0.131185 | 0.080907 | 0.143536 |
| PLAC8L1  | -0.08015 | 0.287551 | 0.396819 |

|         |          |          |          |
|---------|----------|----------|----------|
| PLAC8   | 0.484261 | 7.46E-12 | 2.76E-10 |
| PLAC9   | -0.04282 | 0.570378 | 0.670271 |
| PLAG1   | 0.145624 | 0.052437 | 0.099884 |
| PLAGL1  | -0.14789 | 0.048839 | 0.094127 |
| PLAGL2  | -0.4698  | 3.70E-11 | 1.17E-09 |
| PLAT    | 0.500452 | 1.13E-12 | 5.17E-11 |
| PLAUR   | 0.520121 | 1.00E-13 | 5.92E-12 |
| PLAU    | 0.39261  | 5.95E-08 | 7.41E-07 |
| PLB1    | 0.244894 | 0.000986 | 0.003394 |
| PLBD1   | 0.607867 | 2.31E-19 | 5.85E-17 |
| PLBD2   | -0.41015 | 1.30E-08 | 1.98E-07 |
| PLCB1   | -0.3396  | 3.53E-06 | 2.62E-05 |
| PLCB2   | 0.240623 | 0.001215 | 0.004062 |
| PLCB3   | 0.605337 | 3.55E-19 | 8.46E-17 |
| PLCB4   | -0.21218 | 0.004464 | 0.012414 |
| PLCD1   | 0.259903 | 0.000459 | 0.001765 |
| PLCD3   | 0.712102 | 7.71E-29 | 3.55E-25 |
| PLCD4   | -0.09631 | 0.200963 | 0.299049 |
| PLCE1   | 0.045984 | 0.542187 | 0.645389 |
| PLCG1   | -0.29125 | 8.00E-05 | 0.000391 |
| PLCG2   | 0.052617 | 0.485471 | 0.594408 |
| PLCH1   | 0.143341 | 0.056287 | 0.105982 |
| PLCH2   | 0.289053 | 9.11E-05 | 0.000438 |
| PLCL1   | -0.31589 | 1.74E-05 | 0.000105 |
| PLCL2   | -0.30415 | 3.67E-05 | 0.0002   |
| PLCXD1  | 0.106851 | 0.155727 | 0.243792 |
| PLCXD2  | -0.0093  | 0.901946 | 0.931433 |
| PLCXD3  | -0.20225 | 0.006782 | 0.017771 |
| PLCZ1   | 0.240911 | 0.001198 | 0.004011 |
| PLD1    | 0.06488  | 0.389561 | 0.502032 |
| PLD2    | 0.314007 | 1.97E-05 | 0.000117 |
| PLD3    | -0.1594  | 0.033557 | 0.068828 |
| PLD4    | 0.09735  | 0.196104 | 0.293015 |
| PLD5    | -0.30672 | 3.13E-05 | 0.000175 |
| PLD6    | -0.44916 | 3.20E-10 | 7.92E-09 |
| PLDN    | -0.41496 | 8.46E-09 | 1.37E-07 |
| PLEC    | 0.527275 | 3.99E-14 | 2.58E-12 |
| PLEK2   | 0.589164 | 5.12E-18 | 9.13E-16 |
| PLEKHA1 | 0.064825 | 0.389966 | 0.502521 |
| PLEKHA2 | 0.228428 | 0.002164 | 0.006682 |
| PLEKHA3 | -0.13197 | 0.079086 | 0.140772 |
| PLEKHA4 | 0.256434 | 0.00055  | 0.002062 |
| PLEKHA5 | 0.23391  | 0.001675 | 0.005359 |
| PLEKHA6 | 0.188331 | 0.011819 | 0.028472 |
| PLEKHA7 | 0.403648 | 2.31E-08 | 3.26E-07 |
| PLEKHA8 | 0.003622 | 0.961732 | 0.973997 |
| PLEKHA9 | 0.312698 | 2.14E-05 | 0.000126 |
| PLEKHB1 | -0.28198 | 0.000137 | 0.000627 |
| PLEKHB2 | 0.062529 | 0.407003 | 0.519331 |
| PLEKHF1 | 0.257277 | 0.000527 | 0.001986 |
| PLEKHF2 | -0.03951 | 0.600535 | 0.697052 |
| PLEKHG1 | 0.074121 | 0.325469 | 0.437543 |
| PLEKHG2 | 0.190295 | 0.010951 | 0.026701 |
| PLEKHG3 | 0.106722 | 0.15623  | 0.244348 |

|          |          |          |          |
|----------|----------|----------|----------|
| PLEKHG4B | -0.02373 | 0.753232 | 0.823214 |
| PLEKHG4  | -0.08012 | 0.287748 | 0.396954 |
| PLEKHG5  | 0.246437 | 0.000913 | 0.003176 |
| PLEKHG6  | 0.187147 | 0.01237  | 0.02961  |
| PLEKHG7  | -0.0449  | 0.551771 | 0.653885 |
| PLEKHH1  | 0.032983 | 0.662062 | 0.750494 |
| PLEKHH2  | 0.160616 | 0.032217 | 0.066484 |
| PLEKHH3  | 0.161535 | 0.03123  | 0.06478  |
| PLEKHJ1  | 0.207609 | 0.005424 | 0.014663 |
| PLEKHM1P | 0.388819 | 8.16E-08 | 9.79E-07 |
| PLEKHM1  | 0.358376 | 9.03E-07 | 7.93E-06 |
| PLEKHM2  | -0.16541 | 0.027345 | 0.057892 |
| PLEKHM3  | -0.4023  | 2.60E-08 | 3.60E-07 |
| PLEKHN1  | 0.638288 | 9.38E-22 | 5.15E-19 |
| PLEKHO1  | 0.117519 | 0.118223 | 0.195121 |
| PLEKHO2  | 0.027661 | 0.713982 | 0.791888 |
| PLEK     | -0.04319 | 0.567047 | 0.6671   |
| PLGLA    | -0.00888 | 0.906348 | 0.934661 |
| PLGLB2   | -0.11192 | 0.136907 | 0.219597 |
| PLG      | 0.00056  | 0.994078 | 0.995941 |
| PLIN1    | -0.19188 | 0.010293 | 0.025297 |
| PLIN2    | 0.10573  | 0.160134 | 0.248977 |
| PLIN3    | 0.484848 | 6.98E-12 | 2.61E-10 |
| PLIN4    | -0.03675 | 0.626259 | 0.719729 |
| PLIN5    | 0.090216 | 0.231077 | 0.334552 |
| PLK1S1   | -0.44836 | 3.47E-10 | 8.48E-09 |
| PLK1     | 0.411351 | 1.17E-08 | 1.81E-07 |
| PLK2     | -0.04503 | 0.550626 | 0.652919 |
| PLK3     | 0.352996 | 1.35E-06 | 1.12E-05 |
| PLK4     | 0.192485 | 0.01005  | 0.024804 |
| PLK5P    | 0.119304 | 0.112699 | 0.188039 |
| PLLP     | 0.517333 | 1.43E-13 | 8.16E-12 |
| PLN      | -0.00248 | 0.973743 | 0.982171 |
| PLOD1    | 0.191119 | 0.010604 | 0.025972 |
| PLOD2    | 0.050869 | 0.5001   | 0.607281 |
| PLOD3    | 0.121825 | 0.105245 | 0.178086 |
| PLP1     | -0.06774 | 0.368966 | 0.482344 |
| PLP2     | 0.322636 | 1.12E-05 | 7.19E-05 |
| PLRG1    | -0.06087 | 0.419602 | 0.53177  |
| PLS1     | 0.332925 | 5.61E-06 | 3.94E-05 |
| PLS3     | 0.264268 | 0.000365 | 0.001451 |
| PLSCR1   | 0.205424 | 0.005945 | 0.015854 |
| PLSCR2   | -0.22711 | 0.002299 | 0.007035 |
| PLSCR3   | 0.257263 | 0.000527 | 0.001987 |
| PLSCR4   | -0.25873 | 0.000488 | 0.001864 |
| PLSCR5   | -0.05328 | 0.479974 | 0.589504 |
| PLTP     | 0.01766  | 0.815006 | 0.869111 |
| PLUNC    | -0.03051 | 0.685994 | 0.769919 |
| PLVAP    | -0.28115 | 0.000144 | 0.000653 |
| PLXDC1   | 0.126602 | 0.092187 | 0.159583 |
| PLXDC2   | 0.023312 | 0.757423 | 0.826561 |
| PLXNA1   | 0.202161 | 0.006807 | 0.01782  |
| PLXNA2   | -0.01624 | 0.82961  | 0.87942  |
| PLXNA3   | 0.085057 | 0.25896  | 0.365324 |

|          |          |          |          |
|----------|----------|----------|----------|
| PLXNA4   | -0.12867 | 0.086943 | 0.152196 |
| PLXNB1   | 0.036027 | 0.633061 | 0.724933 |
| PLXNB2   | 0.220937 | 0.00304  | 0.008947 |
| PLXNB3   | 0.308112 | 2.86E-05 | 0.000162 |
| PLXNC1   | -0.25964 | 0.000466 | 0.001785 |
| PLXND1   | -0.08875 | 0.238785 | 0.342942 |
| PM2OD1   | -0.17247 | 0.021328 | 0.046855 |
| PM2OD2   | -0.45494 | 1.77E-10 | 4.69E-09 |
| PMAIP1   | 0.146505 | 0.051011 | 0.097618 |
| PMCHL1   | -0.09738 | 0.195977 | 0.29287  |
| PMCHL2   | -0.11167 | 0.137815 | 0.220768 |
| PMCH     | 0.040866 | 0.588094 | 0.686358 |
| PMEPA1   | 0.402577 | 2.54E-08 | 3.53E-07 |
| PMF1     | 0.066213 | 0.379875 | 0.492664 |
| PMFBP1   | -0.16585 | 0.026931 | 0.057138 |
| PML      | 0.555356 | 8.61E-16 | 8.07E-14 |
| PMM1     | -0.4374  | 1.03E-09 | 2.17E-08 |
| PMM2     | 0.240546 | 0.001219 | 0.004074 |
| PMP22    | 0.049279 | 0.513612 | 0.619656 |
| PMP2     | -0.11647 | 0.121562 | 0.199251 |
| PMPCA    | -0.13457 | 0.073309 | 0.132156 |
| PMPCB    | -0.06221 | 0.409376 | 0.521484 |
| PMS1     | -0.1337  | 0.075203 | 0.135077 |
| PMS2CL   | -0.08206 | 0.276159 | 0.384075 |
| PMS2L11  | 0.293517 | 7.00E-05 | 0.000349 |
| PMS2L1   | 0.130654 | 0.082155 | 0.145346 |
| PMS2L2   | 0.114528 | 0.127949 | 0.207774 |
| PMS2L3   | 0.10902  | 0.147455 | 0.233038 |
| PMS2L4   | -0.18219 | 0.014931 | 0.034701 |
| PMS2L5   | 0.027048 | 0.720052 | 0.796415 |
| PMS2     | -0.17143 | 0.022133 | 0.048318 |
| PMVK     | 0.159211 | 0.033776 | 0.069189 |
| PNCK     | 0.176398 | 0.018505 | 0.041553 |
| PNKD     | 0.388183 | 8.60E-08 | 1.02E-06 |
| PNKP     | 0.289369 | 8.94E-05 | 0.000431 |
| PNLDC1   | -0.09691 | 0.198144 | 0.295544 |
| PNLIPRP1 | -0.07156 | 0.342482 | 0.454727 |
| PNLIPRP2 | -0.06357 | 0.399255 | 0.511823 |
| PNLIPRP3 | -0.04284 | 0.57019  | 0.670091 |
| PNLIP    | -0.07004 | 0.352906 | 0.465721 |
| PNMA1    | 0.026358 | 0.726908 | 0.802204 |
| PNMA2    | -0.15273 | 0.041821 | 0.082755 |
| PNMA3    | -0.20451 | 0.006177 | 0.016392 |
| PNMA5    | 0.030483 | 0.686268 | 0.769919 |
| PNMA6A   | 0.011983 | 0.873862 | 0.912727 |
| PNMAL1   | -0.27901 | 0.000162 | 0.000724 |
| PNMAL2   | -0.00385 | 0.959281 | 0.972162 |
| PNMT     | 0.105612 | 0.160605 | 0.249573 |
| PNN      | 0.073094 | 0.332232 | 0.44446  |
| PN01     | 0.034682 | 0.645808 | 0.735993 |
| PNOC     | 0.038791 | 0.607193 | 0.703005 |
| PNPLA1   | 0.234995 | 0.001591 | 0.005131 |
| PNPLA2   | 0.314696 | 1.88E-05 | 0.000112 |
| PNPLA3   | 0.409725 | 1.35E-08 | 2.04E-07 |

|         |          |          |          |
|---------|----------|----------|----------|
| PNPLA4  | -0.08441 | 0.26262  | 0.369612 |
| PNPLA5  | -0.12249 | 0.103347 | 0.175369 |
| PNPLA6  | 0.092356 | 0.220154 | 0.321907 |
| PNPLA7  | -0.20643 | 0.005701 | 0.015306 |
| PNPLA8  | -0.24509 | 0.000976 | 0.003363 |
| PNPO    | 0.057506 | 0.44579  | 0.557174 |
| PNPT1   | 0.137499 | 0.067214 | 0.122942 |
| PNP     | 0.462781 | 7.83E-11 | 2.26E-09 |
| PNRC1   | -0.17116 | 0.022354 | 0.048747 |
| PNRC2   | -0.05702 | 0.449635 | 0.560669 |
| POC1A   | 0.431474 | 1.82E-09 | 3.56E-08 |
| POC1B   | 0.138236 | 0.065747 | 0.120702 |
| POC5    | -0.12212 | 0.104414 | 0.176921 |
| PODNL1  | 0.388289 | 8.53E-08 | 1.02E-06 |
| PODN    | 0.056155 | 0.45657  | 0.567598 |
| PODXL2  | -0.25706 | 0.000532 | 0.002006 |
| PODXL   | 0.22084  | 0.003054 | 0.008969 |
| POF1B   | 0.398389 | 3.64E-08 | 4.80E-07 |
| POFUT1  | -0.39946 | 3.32E-08 | 4.44E-07 |
| POFUT2  | 0.008167 | 0.913839 | 0.93982  |
| POGK    | 0.138026 | 0.066162 | 0.121308 |
| POGZ    | -0.07188 | 0.340351 | 0.452687 |
| POLA1   | -0.31325 | 2.07E-05 | 0.000122 |
| POLA2   | 0.134956 | 0.072483 | 0.130953 |
| POLB    | 0.462747 | 7.86E-11 | 2.27E-09 |
| POLD1   | 0.246399 | 0.000915 | 0.003181 |
| POLD2   | -0.0162  | 0.83004  | 0.879641 |
| POLD3   | 0.082334 | 0.274573 | 0.382508 |
| POLD4   | 0.551246 | 1.54E-15 | 1.34E-13 |
| POLDIP2 | 0.135466 | 0.0714   | 0.129409 |
| POLDIP3 | -0.18136 | 0.015404 | 0.035636 |
| POLE2   | 0.272225 | 0.000237 | 0.001001 |
| POLE3   | 0.0863   | 0.252041 | 0.357933 |
| POLE4   | 0.379568 | 1.74E-07 | 1.90E-06 |
| POLE    | 0.018615 | 0.805193 | 0.862035 |
| POLG2   | 0.017389 | 0.8178   | 0.870889 |
| POLG    | 0.030485 | 0.686246 | 0.769919 |
| POLH    | -0.28114 | 0.000144 | 0.000653 |
| POLI    | -0.23236 | 0.001802 | 0.005705 |
| POLK    | -0.13589 | 0.070502 | 0.128023 |
| POLL    | 0.017602 | 0.8156   | 0.869573 |
| POLM    | 0.18908  | 0.011481 | 0.027791 |
| POLN    | -0.24045 | 0.001225 | 0.004091 |
| POLQ    | 0.359123 | 8.53E-07 | 7.56E-06 |
| POLR1A  | -0.13781 | 0.066599 | 0.122029 |
| POLR1B  | -0.17573 | 0.018962 | 0.042459 |
| POLR1C  | 0.014218 | 0.850588 | 0.895463 |
| POLR1D  | 0.175021 | 0.019456 | 0.043368 |
| POLR1E  | -0.1834  | 0.014269 | 0.03341  |
| POLR2A  | -0.27203 | 0.000239 | 0.001009 |
| POLR2B  | -0.30749 | 2.98E-05 | 0.000168 |
| POLR2C  | -0.08558 | 0.256034 | 0.362455 |
| POLR2D  | 0.160375 | 0.03248  | 0.066958 |
| POLR2E  | 0.127226 | 0.090581 | 0.157202 |



|           |          |          |          |
|-----------|----------|----------|----------|
| POLR2F    | 0.040813 | 0.588576 | 0.686556 |
| POLR2G    | 0.205463 | 0.005935 | 0.015835 |
| POLR2H    | 0.400143 | 3.13E-08 | 4.22E-07 |
| POLR2I    | 0.062697 | 0.405743 | 0.518258 |
| POLR2J2   | -0.06315 | 0.402336 | 0.515005 |
| POLR2J3   | 0.109715 | 0.144876 | 0.229714 |
| POLR2J4   | -0.06021 | 0.424645 | 0.536957 |
| POLR2J    | 0.086364 | 0.251686 | 0.357557 |
| POLR2K    | -0.03728 | 0.621285 | 0.715384 |
| POLR2L    | 0.074295 | 0.324328 | 0.436335 |
| POLR3A    | -0.39388 | 5.34E-08 | 6.75E-07 |
| POLR3B    | -0.43854 | 9.21E-10 | 1.98E-08 |
| POLR3C    | 0.078453 | 0.297911 | 0.407956 |
| POLR3D    | 0.033815 | 0.654081 | 0.743151 |
| POLR3E    | -0.03853 | 0.609582 | 0.705069 |
| POLR3F    | -0.4045  | 2.15E-08 | 3.05E-07 |
| POLR3GL   | 0.10145  | 0.177834 | 0.270624 |
| POLR3G    | 0.082352 | 0.274469 | 0.382508 |
| POLR3H    | -0.35598 | 1.08E-06 | 9.29E-06 |
| POLR3K    | 0.058393 | 0.438792 | 0.550515 |
| POLRMT    | 0.060407 | 0.423145 | 0.535368 |
| POM121C   | -0.35848 | 8.95E-07 | 7.89E-06 |
| POM121L1C | -0.14045 | 0.061495 | 0.113943 |
| POM121L1F | 0.075234 | 0.318235 | 0.429923 |
| POM121L2  | -0.01653 | 0.826648 | 0.877192 |
| POM121L4F | -0.19973 | 0.007519 | 0.019374 |
| POM121L8F | -0.08513 | 0.258545 | 0.364993 |
| POM121L9F | 0.011632 | 0.877532 | 0.915042 |
| POM121    | -0.34405 | 2.57E-06 | 1.98E-05 |
| POMC      | -0.19337 | 0.009707 | 0.02408  |
| POMGNT1   | -0.25367 | 0.000634 | 0.002321 |
| POMP      | 0.409159 | 1.42E-08 | 2.13E-07 |
| POMT1     | -0.30242 | 4.08E-05 | 0.00022  |
| POMT2     | -0.34648 | 2.16E-06 | 1.70E-05 |
| POMZP3    | 0.112193 | 0.135961 | 0.218311 |
| PON1      | -0.25807 | 0.000505 | 0.001918 |
| PON2      | 0.240585 | 0.001217 | 0.004068 |
| PON3      | 0.079065 | 0.294147 | 0.404062 |
| POP1      | -0.03368 | 0.655382 | 0.744458 |
| POP4      | 0.126136 | 0.093403 | 0.161193 |
| POP5      | 0.092947 | 0.217199 | 0.318494 |
| POP7      | 0.145256 | 0.053042 | 0.100831 |
| POPDC2    | -0.06928 | 0.358146 | 0.471226 |
| POPDC3    | -0.26245 | 0.000402 | 0.001576 |
| PORCN     | 0.277281 | 0.000179 | 0.000787 |
| POR       | 0.143308 | 0.056345 | 0.106051 |
| POSTN     | 0.204509 | 0.006176 | 0.016391 |
| POT1      | -0.1171  | 0.119565 | 0.196827 |
| POTEB     | 0.061987 | 0.411092 | 0.523192 |
| POTEC     | 0.023034 | 0.760227 | 0.828889 |
| POTEE     | 0.025054 | 0.739924 | 0.812487 |
| POTEF     | -0.10059 | 0.181571 | 0.275273 |
| POTEG     | -0.11403 | 0.129643 | 0.209976 |
| POTEH     | -0.01688 | 0.82306  | 0.874728 |

|           |          |          |          |
|-----------|----------|----------|----------|
| POU1F1    | 0.053991 | 0.474128 | 0.583882 |
| POU2AF1   | 0.065522 | 0.384878 | 0.497683 |
| POU2F1    | -0.11267 | 0.134296 | 0.216164 |
| POU2F2    | -0.08226 | 0.27498  | 0.382892 |
| POU2F3    | 0.510348 | 3.41E-13 | 1.79E-11 |
| POU3F1    | -0.0259  | 0.731457 | 0.805919 |
| POU3F2    | -0.22644 | 0.00237  | 0.007219 |
| POU3F3    | -0.15148 | 0.043541 | 0.085661 |
| POU3F4    | 0.016579 | 0.826148 | 0.876785 |
| POU4F1    | 0.018954 | 0.801719 | 0.860417 |
| POU4F2    | -0.16995 | 0.023333 | 0.050612 |
| POU4F3    | -0.25623 | 0.000556 | 0.00208  |
| POU5F1B   | 0.393288 | 5.62E-08 | 7.04E-07 |
| POU5F1    | 0.56632  | 1.74E-16 | 1.99E-14 |
| POU5F2    | 0.055131 | 0.464831 | 0.574904 |
| POU6F1    | -0.14978 | 0.045991 | 0.089607 |
| POU6F2    | -0.48483 | 6.99E-12 | 2.61E-10 |
| PP14571   | 0.109643 | 0.145142 | 0.230063 |
| PPA1      | 0.318216 | 1.50E-05 | 9.25E-05 |
| PPA2      | 0.078132 | 0.299899 | 0.409998 |
| PPAN-P2RY | -0.14004 | 0.062264 | 0.11526  |
| PPAN      | 0.16281  | 0.029903 | 0.0625   |
| PPAP2A    | -0.20944 | 0.00502  | 0.013744 |
| PPAP2B    | -0.29612 | 5.99E-05 | 0.000306 |
| PPAP2C    | 0.485795 | 6.26E-12 | 2.39E-10 |
| PPAPDC1A  | 0.385587 | 1.07E-07 | 1.23E-06 |
| PPAPDC1B  | -0.24902 | 0.000802 | 0.002856 |
| PPAPDC2   | -0.19313 | 0.009796 | 0.024266 |
| PPAPDC3   | 0.014729 | 0.845292 | 0.890981 |
| PPARA     | -0.18749 | 0.01221  | 0.029288 |
| PPARD     | 0.31957  | 1.37E-05 | 8.55E-05 |
| PPARGC1A  | -0.21937 | 0.00326  | 0.009479 |
| PPARGC1B  | 0.079995 | 0.288487 | 0.397806 |
| PPARG     | 0.633696 | 2.24E-21 | 1.03E-18 |
| PPAT      | -0.17258 | 0.021247 | 0.046692 |
| PPBPL2    | 0.109625 | 0.145207 | 0.230129 |
| PPBP      | 0.081249 | 0.28097  | 0.389369 |
| PPCDC     | 0.160785 | 0.032033 | 0.066154 |
| PPCS      | 0.050257 | 0.505278 | 0.612129 |
| PPDPF     | 0.301233 | 4.39E-05 | 0.000235 |
| PPEF1     | 0.233644 | 0.001696 | 0.005418 |
| PPEF2     | 0.025107 | 0.739387 | 0.812077 |
| PPFIA1    | 0.04925  | 0.51386  | 0.619918 |
| PPFIA2    | 0.086838 | 0.249086 | 0.354602 |
| PPFIA3    | -0.21761 | 0.003524 | 0.010128 |
| PPFIA4    | 0.33109  | 6.36E-06 | 4.38E-05 |
| PPFIBP1   | 0.059241 | 0.432162 | 0.544042 |
| PPFIBP2   | 0.118668 | 0.114644 | 0.190518 |
| PPHLN1    | 0.029318 | 0.697661 | 0.779013 |
| PPIAL4C   | 0.285831 | 0.00011  | 0.000516 |
| PPIAL4D   | -0.12983 | 0.084113 | 0.148134 |
| PPIAL4E   | 0.024995 | 0.740512 | 0.812847 |
| PPIAL4G   | 0.273661 | 0.000219 | 0.000934 |
| PPIA      | 0.378947 | 1.83E-07 | 1.99E-06 |

|          |          |          |          |
|----------|----------|----------|----------|
| PPIB     | 0.01224  | 0.871178 | 0.911085 |
| PPIC     | 0.360327 | 7.79E-07 | 7.01E-06 |
| PPID     | -0.2105  | 0.004797 | 0.013226 |
| PIEL     | -0.14988 | 0.045847 | 0.089389 |
| PIE      | 0.039805 | 0.597822 | 0.6948   |
| PIF      | -0.02995 | 0.691457 | 0.773967 |
| PIG      | 0.045202 | 0.549088 | 0.651557 |
| PIH      | 0.224526 | 0.002587 | 0.007782 |
| PIIL1    | -0.10048 | 0.182017 | 0.275738 |
| PIIL2    | -0.15302 | 0.041425 | 0.082087 |
| PIIL3    | 0.197461 | 0.008243 | 0.020945 |
| PIIL4    | -0.26002 | 0.000456 | 0.001758 |
| PIIL5    | 0.175057 | 0.01943  | 0.043321 |
| PIIL6    | -0.34672 | 2.12E-06 | 1.68E-05 |
| PIIP5K1  | -0.00788 | 0.916811 | 0.942208 |
| PIIP5K2  | -0.2264  | 0.002376 | 0.00723  |
| PPL      | 0.392331 | 6.09E-08 | 7.54E-07 |
| PPM1A    | -0.38262 | 1.36E-07 | 1.52E-06 |
| PPM1B    | -0.1944  | 0.009316 | 0.023237 |
| PPM1D    | -0.42486 | 3.40E-09 | 6.21E-08 |
| PPM1E    | -0.3437  | 2.64E-06 | 2.03E-05 |
| PPM1F    | -0.12587 | 0.094091 | 0.162169 |
| PPM1G    | 0.330764 | 6.50E-06 | 4.47E-05 |
| PPM1H    | -0.25629 | 0.000554 | 0.002074 |
| PPM1J    | 0.559505 | 4.73E-16 | 4.73E-14 |
| PPM1K    | -0.37259 | 3.03E-07 | 3.09E-06 |
| PPM1L    | -0.13989 | 0.062543 | 0.115668 |
| PPM1M    | 0.130347 | 0.082882 | 0.146392 |
| PPM1N    | 0.501467 | 1.00E-12 | 4.62E-11 |
| PPME1    | 0.180794 | 0.015734 | 0.036269 |
| PPOX     | 0.010152 | 0.893014 | 0.925331 |
| PPP1CA   | 0.490033 | 3.85E-12 | 1.55E-10 |
| PPP1CB   | 0.091489 | 0.224532 | 0.326751 |
| PPP1CC   | -0.16808 | 0.024917 | 0.053487 |
| PPP1R10  | -0.27234 | 0.000235 | 0.000996 |
| PPP1R11  | 0.212637 | 0.004377 | 0.012205 |
| PPP1R12A | -0.22676 | 0.002336 | 0.007133 |
| PPP1R12B | 0.010289 | 0.891574 | 0.924439 |
| PPP1R12C | 0.066645 | 0.376762 | 0.489462 |
| PPP1R13B | -0.02431 | 0.747399 | 0.818467 |
| PPP1R13L | 0.588807 | 5.42E-18 | 9.58E-16 |
| PPP1R14A | 0.201755 | 0.006921 | 0.018077 |
| PPP1R14B | 0.452963 | 2.17E-10 | 5.56E-09 |
| PPP1R14C | 0.056543 | 0.453461 | 0.564371 |
| PPP1R14D | 0.421605 | 4.61E-09 | 8.07E-08 |
| PPP1R15A | 0.297289 | 5.58E-05 | 0.000287 |
| PPP1R15B | 0.002531 | 0.973255 | 0.981845 |
| PPP1R16A | 0.180199 | 0.016086 | 0.036972 |
| PPP1R16B | -0.26726 | 0.00031  | 0.001264 |
| PPP1R1A  | -0.21227 | 0.004448 | 0.012372 |
| PPP1R1B  | 0.311713 | 2.28E-05 | 0.000132 |
| PPP1R1C  | 0.392581 | 5.96E-08 | 7.41E-07 |
| PPP1R2P1 | 0.071227 | 0.344762 | 0.457079 |
| PPP1R2P3 | -0.09449 | 0.209609 | 0.309544 |

|          |          |          |          |
|----------|----------|----------|----------|
| PPP1R2P9 | -0.06284 | 0.404679 | 0.5173   |
| PPP1R2   | 0.064363 | 0.393355 | 0.505998 |
| PPP1R3A  | -0.13606 | 0.07016  | 0.127536 |
| PPP1R3B  | 0.31803  | 1.52E-05 | 9.34E-05 |
| PPP1R3C  | 0.03229  | 0.66874  | 0.756027 |
| PPP1R3D  | 0.162486 | 0.030237 | 0.063083 |
| PPP1R3E  | -0.26149 | 0.000422 | 0.001645 |
| PPP1R3F  | -0.35013 | 1.66E-06 | 1.35E-05 |
| PPP1R3G  | 0.561961 | 3.31E-16 | 3.52E-14 |
| PPP1R7   | 0.391942 | 6.29E-08 | 7.77E-07 |
| PPP1R8   | -0.1881  | 0.011926 | 0.028718 |
| PPP1R9A  | -0.19198 | 0.010253 | 0.025217 |
| PPP1R9B  | -0.01465 | 0.846131 | 0.891581 |
| PPP2CA   | 0.085381 | 0.257145 | 0.363484 |
| PPP2CB   | 0.105801 | 0.159855 | 0.248563 |
| PPP2R1A  | 0.189514 | 0.011289 | 0.027396 |
| PPP2R1B  | -0.23645 | 0.001485 | 0.004826 |
| PPP2R2A  | 0.280923 | 0.000146 | 0.000659 |
| PPP2R2B  | -0.20544 | 0.00594  | 0.015843 |
| PPP2R2C  | 0.085729 | 0.255204 | 0.36162  |
| PPP2R2D  | -0.1051  | 0.162645 | 0.252168 |
| PPP2R3A  | 0.162868 | 0.029845 | 0.062408 |
| PPP2R3B  | -0.14738 | 0.049626 | 0.095422 |
| PPP2R3C  | -0.2237  | 0.002685 | 0.008035 |
| PPP2R4   | -0.00727 | 0.923284 | 0.946809 |
| PPP2R5A  | 0.018109 | 0.810392 | 0.865825 |
| PPP2R5B  | 0.077862 | 0.301575 | 0.411668 |
| PPP2R5C  | -0.29648 | 5.86E-05 | 0.0003   |
| PPP2R5D  | -0.12374 | 0.099854 | 0.170393 |
| PPP2R5E  | -0.11675 | 0.120666 | 0.198243 |
| PPP3CA   | 0.295863 | 6.08E-05 | 0.000309 |
| PPP3CB   | -0.50611 | 5.73E-13 | 2.80E-11 |
| PPP3CC   | 0.070978 | 0.346461 | 0.458874 |
| PPP3R1   | 0.116029 | 0.122995 | 0.201183 |
| PPP3R2   | 0.005365 | 0.943342 | 0.961925 |
| PPP4C    | 0.453577 | 2.04E-10 | 5.28E-09 |
| PPP4R1L  | 0.261622 | 0.000419 | 0.001635 |
| PPP4R1   | 0.341976 | 2.98E-06 | 2.26E-05 |
| PPP4R2   | -0.11682 | 0.120449 | 0.197969 |
| PPP4R4   | -0.4025  | 2.55E-08 | 3.55E-07 |
| PPP5C    | 0.014034 | 0.852498 | 0.896951 |
| PPP6C    | -0.42674 | 2.85E-09 | 5.31E-08 |
| PPPDE1   | 0.185929 | 0.012961 | 0.030794 |
| PPPDE2   | 0.348082 | 1.93E-06 | 1.53E-05 |
| PPRC1    | 0.067992 | 0.367171 | 0.480793 |
| PPT1     | -0.21887 | 0.003334 | 0.009655 |
| PPT2     | -0.29966 | 4.83E-05 | 0.000255 |
| PPTC7    | -0.14394 | 0.055259 | 0.104414 |
| PPWD1    | -0.19572 | 0.00884  | 0.022207 |
| PPY2     | -0.14792 | 0.048791 | 0.094052 |
| PPYR1    | 0.404768 | 2.10E-08 | 2.99E-07 |
| PPY      | 0.017778 | 0.813797 | 0.868149 |
| PQBP1    | 0.018465 | 0.806736 | 0.86322  |
| PQLC1    | -0.18253 | 0.014745 | 0.03438  |

|          |          |          |          |
|----------|----------|----------|----------|
| PQLC2    | -0.10203 | 0.175349 | 0.267771 |
| PQLC3    | 0.381087 | 1.54E-07 | 1.71E-06 |
| PRAC     | 0.0698   | 0.35454  | 0.467472 |
| PRAF2    | -0.06695 | 0.374546 | 0.487537 |
| PRAM1    | 0.200963 | 0.00715  | 0.018534 |
| PRAMEF10 | 0.004878 | 0.948478 | 0.965182 |
| PRAMEF11 | -0.09839 | 0.191354 | 0.287197 |
| PRAMEF12 | -0.30006 | 4.72E-05 | 0.00025  |
| PRAMEF1  | -0.21401 | 0.004126 | 0.01163  |
| PRAMEF20 | -0.17117 | 0.022341 | 0.048728 |
| PRAMEF22 | 0.020475 | 0.786176 | 0.848525 |
| PRAMEF2  | -0.1501  | 0.045515 | 0.088907 |
| PRAMEF4  | -0.13352 | 0.075592 | 0.135653 |
| PRAMEF6  | -0.16455 | 0.028169 | 0.059359 |
| PRAMEF8  | -0.24834 | 0.000831 | 0.002932 |
| PRAME    | -0.00295 | 0.968811 | 0.97861  |
| PRAP1    | 0.229591 | 0.00205  | 0.006367 |
| PRB1     | 0.314021 | 1.97E-05 | 0.000117 |
| PRB2     | 0.244607 | 0.001    | 0.003434 |
| PRB3     | 0.114299 | 0.128716 | 0.208865 |
| PRB4     | 0.137677 | 0.066856 | 0.122408 |
| PRC1     | 0.247035 | 0.000886 | 0.003101 |
| PRCC     | 0.169924 | 0.023353 | 0.050645 |
| PRCD     | -0.09816 | 0.192395 | 0.288475 |
| PRCP     | -0.18172 | 0.0152   | 0.035226 |
| PRDM10   | -0.10599 | 0.159115 | 0.247709 |
| PRDM11   | -0.23108 | 0.001913 | 0.006004 |
| PRDM12   | -0.07207 | 0.339052 | 0.451233 |
| PRDM13   | -0.07161 | 0.342152 | 0.454479 |
| PRDM14   | -0.12011 | 0.110262 | 0.184928 |
| PRDM15   | -0.11792 | 0.116962 | 0.19341  |
| PRDM16   | 0.067562 | 0.370221 | 0.483479 |
| PRDM1    | 0.092668 | 0.218592 | 0.320141 |
| PRDM2    | -0.14656 | 0.050916 | 0.097466 |
| PRDM4    | -0.38403 | 1.21E-07 | 1.38E-06 |
| PRDM5    | -0.13078 | 0.081846 | 0.144941 |
| PRDM6    | 0.209251 | 0.00506  | 0.013835 |
| PRDM7    | -0.02584 | 0.732075 | 0.806196 |
| PRDM8    | 0.334192 | 5.14E-06 | 3.65E-05 |
| PRDM9    | 0.035702 | 0.636132 | 0.727733 |
| PRDX1    | 0.396842 | 4.16E-08 | 5.40E-07 |
| PRDX2    | -0.09835 | 0.191515 | 0.287396 |
| PRDX3    | -0.2193  | 0.003271 | 0.009502 |
| PRDX4    | -0.27147 | 0.000247 | 0.001037 |
| PRDX5    | 0.510146 | 3.50E-13 | 1.81E-11 |
| PRDX6    | 0.286926 | 0.000103 | 0.000489 |
| PRDXDD1P | 0.148828 | 0.047403 | 0.091942 |
| PREB     | -0.09751 | 0.195354 | 0.292136 |
| PRELID1  | 0.259813 | 0.000461 | 0.001772 |
| PRELID2  | 0.440793 | 7.38E-10 | 1.63E-08 |
| PRELP    | 0.187529 | 0.01219  | 0.029243 |
| PREPL    | -0.43954 | 8.35E-10 | 1.82E-08 |
| PREP     | 0.136203 | 0.069859 | 0.127048 |
| PREX1    | -0.26748 | 0.000307 | 0.001251 |

|          |          |          |          |
|----------|----------|----------|----------|
| PREX2    | -0.18999 | 0.011082 | 0.026978 |
| PRF1     | -0.14979 | 0.045978 | 0.089592 |
| PRG1     | 0.031564 | 0.675764 | 0.76179  |
| PRG2     | 0.135123 | 0.072125 | 0.130497 |
| PRG3     | 0.136861 | 0.068504 | 0.124941 |
| PRG4     | -0.1046  | 0.16467  | 0.254787 |
| PRH1     | -0.19887 | 0.007787 | 0.019954 |
| PRH2     | 0.073351 | 0.33053  | 0.442649 |
| PRHOXNB  | -0.12109 | 0.107382 | 0.18102  |
| PRIC285  | 0.335478 | 4.70E-06 | 3.37E-05 |
| PRICKLE1 | -0.00218 | 0.976973 | 0.98409  |
| PRICKLE2 | -0.22485 | 0.002549 | 0.007688 |
| PRICKLE3 | 0.366135 | 5.01E-07 | 4.76E-06 |
| PRICKLE4 | 0.326642 | 8.59E-06 | 5.68E-05 |
| PRIM1    | -0.24521 | 0.00097  | 0.003347 |
| PRIM2    | 0.119141 | 0.113198 | 0.188637 |
| PRIMA1   | -0.06579 | 0.382936 | 0.495789 |
| PRINS    | 0.098233 | 0.192059 | 0.287994 |
| PRKAA1   | 0.098074 | 0.192782 | 0.288969 |
| PRKAA2   | -0.00921 | 0.902848 | 0.932122 |
| PRKAB1   | 0.071194 | 0.34499  | 0.45732  |
| PRKAB2   | -0.05465 | 0.468744 | 0.578799 |
| PRKACA   | -0.25283 | 0.000662 | 0.002407 |
| PRKACB   | -0.06824 | 0.365433 | 0.478682 |
| PRKACG   | 0.051395 | 0.495671 | 0.603535 |
| PRKAG1   | -0.22349 | 0.002711 | 0.008103 |
| PRKAG2   | -0.2017  | 0.006938 | 0.018103 |
| PRKAG3   | 0.02822  | 0.708456 | 0.787643 |
| PRKAR1A  | -0.40173 | 2.73E-08 | 3.75E-07 |
| PRKAR1B  | -0.16547 | 0.027294 | 0.057804 |
| PRKAR2A  | -0.30157 | 4.30E-05 | 0.000231 |
| PRKAR2B  | -0.4157  | 7.91E-09 | 1.29E-07 |
| PRKCA    | 0.114039 | 0.129594 | 0.209956 |
| PRKCB    | -0.11618 | 0.122493 | 0.200512 |
| PRKCDBP  | 0.450697 | 2.74E-10 | 6.87E-09 |
| PRKCD    | 0.201976 | 0.006859 | 0.017939 |
| PRKCE    | -0.37058 | 3.55E-07 | 3.53E-06 |
| PRKCG    | 0.02708  | 0.719732 | 0.796225 |
| PRKCH    | -0.07403 | 0.326036 | 0.438127 |
| PRKCI    | 0.378547 | 1.89E-07 | 2.04E-06 |
| PRKCQ    | -0.05612 | 0.456835 | 0.567892 |
| PRKCSH   | -0.0625  | 0.407226 | 0.51954  |
| PRKCZ    | 0.215565 | 0.003855 | 0.010962 |
| PRKD1    | -0.19532 | 0.008983 | 0.0225   |
| PRKD2    | 0.400811 | 2.96E-08 | 4.01E-07 |
| PRKD3    | -0.0618  | 0.412494 | 0.524486 |
| PRKDC    | -0.15885 | 0.034182 | 0.069891 |
| PRKG1    | -0.05436 | 0.47108  | 0.581143 |
| PRKG2    | -0.31284 | 2.12E-05 | 0.000125 |
| PRKRA    | 0.191317 | 0.010522 | 0.025808 |
| PRKRIP1  | 0.034439 | 0.648121 | 0.737736 |
| PRKRIR   | -0.17708 | 0.018047 | 0.040695 |
| PRKX     | 0.005301 | 0.944017 | 0.962266 |
| PRKY     | -0.02271 | 0.763511 | 0.831553 |

|         |          |          |          |
|---------|----------|----------|----------|
| PRLHR   | -0.26255 | 0.000399 | 0.001568 |
| PRLH    | -0.01717 | 0.820026 | 0.872489 |
| PRLR    | -0.49066 | 3.58E-12 | 1.44E-10 |
| PRL     | -0.19643 | 0.00859  | 0.021685 |
| PRM1    | -0.02378 | 0.752685 | 0.822799 |
| PRMT10  | -0.43526 | 1.27E-09 | 2.59E-08 |
| PRMT1   | 0.153202 | 0.041187 | 0.081696 |
| PRMT2   | 0.040898 | 0.587802 | 0.686108 |
| PRMT3   | 0.069359 | 0.357594 | 0.470652 |
| PRMT5   | 0.115342 | 0.125243 | 0.204303 |
| PRMT6   | -0.17964 | 0.016426 | 0.037633 |
| PRMT7   | 0.225087 | 0.002522 | 0.007619 |
| PRMT8   | -0.28675 | 0.000104 | 0.000493 |
| PRND    | 0.183014 | 0.014477 | 0.033827 |
| PRNP    | -0.11866 | 0.114665 | 0.190522 |
| PRO0611 | -0.0378  | 0.616414 | 0.711142 |
| PRO0628 | 0.125429 | 0.095269 | 0.163913 |
| PRO1768 | -0.07502 | 0.319636 | 0.431346 |
| PROCA1  | 0.094204 | 0.211018 | 0.311301 |
| PROCR   | 0.150304 | 0.045224 | 0.088452 |
| PROC    | 0.178576 | 0.017083 | 0.038873 |
| PRODH2  | -0.36559 | 5.22E-07 | 4.94E-06 |
| PRODH   | 0.087505 | 0.245451 | 0.350343 |
| PROK1   | -0.03979 | 0.597967 | 0.694887 |
| PROK2   | -0.19821 | 0.007996 | 0.020434 |
| PROKR1  | -0.06234 | 0.408464 | 0.520722 |
| PROKR2  | -0.04497 | 0.551148 | 0.653499 |
| PROL1   | -0.10054 | 0.181798 | 0.27549  |
| PROM1   | 0.253653 | 0.000635 | 0.002323 |
| PROM2   | 0.537149 | 1.08E-14 | 7.89E-13 |
| PROP1   | -0.14257 | 0.057644 | 0.108023 |
| PROS1   | 0.009802 | 0.896684 | 0.927986 |
| PROSC   | 0.003459 | 0.963449 | 0.975136 |
| PROX1   | -0.40062 | 3.00E-08 | 4.07E-07 |
| PROX2   | -0.22822 | 0.002185 | 0.006734 |
| PROZ    | -0.31193 | 2.25E-05 | 0.000131 |
| PRPF18  | 0.200202 | 0.007376 | 0.019052 |
| PRPF19  | 0.081341 | 0.280426 | 0.388806 |
| PRPF31  | 0.163752 | 0.028955 | 0.060774 |
| PRPF38A | 0.152721 | 0.041835 | 0.082769 |
| PRPF38B | -0.03899 | 0.605365 | 0.701464 |
| PRPF39  | -0.0532  | 0.480643 | 0.590068 |
| PRPF3   | 0.135946 | 0.070392 | 0.127888 |
| PRPF40A | 0.195328 | 0.008979 | 0.022497 |
| PRPF40B | 0.004878 | 0.948471 | 0.965182 |
| PRPF4B  | -0.2518  | 0.000697 | 0.002524 |
| PRPF4   | -0.17958 | 0.016463 | 0.037704 |
| PRPF6   | 0.011509 | 0.878817 | 0.916038 |
| PRPF8   | -0.5823  | 1.52E-17 | 2.33E-15 |
| PRPH2   | -0.06567 | 0.383808 | 0.496755 |
| PRPH    | -0.14606 | 0.051726 | 0.098786 |
| PRPS1L1 | -0.17991 | 0.016262 | 0.037344 |
| PRPS1   | -0.44851 | 3.42E-10 | 8.37E-09 |
| PRPS2   | 0.236905 | 0.001453 | 0.00474  |

|           |          |          |          |
|-----------|----------|----------|----------|
| PRPSAP1   | -0.15855 | 0.034537 | 0.070486 |
| PRPSAP2   | -0.40563 | 1.94E-08 | 2.79E-07 |
| PRR11     | 0.089045 | 0.237209 | 0.341157 |
| PRR12     | 0.101941 | 0.175732 | 0.268086 |
| PRR13     | 0.390117 | 7.33E-08 | 8.89E-07 |
| PRR14     | 0.288762 | 9.27E-05 | 0.000445 |
| PRR15L    | 0.342189 | 2.94E-06 | 2.24E-05 |
| PRR15     | 0.560464 | 4.12E-16 | 4.22E-14 |
| PRR16     | -0.00319 | 0.966276 | 0.977097 |
| PRR18     | -0.31056 | 2.45E-05 | 0.000141 |
| PRR19     | 0.113333 | 0.132003 | 0.213188 |
| PRR22     | 0.089341 | 0.235648 | 0.339604 |
| PRR23A    | 0.066527 | 0.377614 | 0.490303 |
| PRR23B    | 0.042653 | 0.571861 | 0.671654 |
| PRR24     | 0.322672 | 1.12E-05 | 7.18E-05 |
| PRR25     | 0.091181 | 0.226101 | 0.328599 |
| PRR3      | -0.12535 | 0.095486 | 0.164215 |
| PRR4      | 0.026416 | 0.726328 | 0.801831 |
| PRR5-ARHC | 0.427415 | 2.68E-09 | 5.00E-08 |
| PRR5L     | 0.335905 | 4.56E-06 | 3.28E-05 |
| PRR5      | 0.186721 | 0.012574 | 0.03004  |
| PRR7      | 0.066423 | 0.378363 | 0.491089 |
| PRRC1     | -0.11778 | 0.117418 | 0.194003 |
| PRRG1     | 0.35033  | 1.64E-06 | 1.33E-05 |
| PRRG2     | 0.252541 | 0.000672 | 0.002439 |
| PRRG3     | -0.14153 | 0.05951  | 0.110848 |
| PRRG4     | 0.2162   | 0.003749 | 0.010708 |
| PRRT1     | -0.23628 | 0.001497 | 0.004858 |
| PRRT2     | -0.00703 | 0.925794 | 0.948728 |
| PRRT3     | -0.32334 | 1.07E-05 | 6.90E-05 |
| PRRT4     | -0.22045 | 0.003107 | 0.009102 |
| PRRX1     | 0.121687 | 0.105644 | 0.178609 |
| PRRX2     | 0.357242 | 9.82E-07 | 8.54E-06 |
| PRSS12    | 0.37476  | 2.55E-07 | 2.66E-06 |
| PRSS16    | 0.266686 | 0.00032  | 0.001298 |
| PRSS1     | -0.06232 | 0.408567 | 0.520762 |
| PRSS21    | 0.285991 | 0.000109 | 0.000512 |
| PRSS22    | 0.538848 | 8.57E-15 | 6.42E-13 |
| PRSS23    | 0.115017 | 0.126317 | 0.205692 |
| PRSS27    | 0.175753 | 0.018945 | 0.04243  |
| PRSS30P   | 0.153541 | 0.040735 | 0.08093  |
| PRSS33    | 0.283827 | 0.000123 | 0.000571 |
| PRSS35    | -0.21948 | 0.003244 | 0.009439 |
| PRSS36    | 0.355428 | 1.12E-06 | 9.61E-06 |
| PRSS37    | 0.01884  | 0.802894 | 0.861071 |
| PRSS38    | 0.044204 | 0.557951 | 0.659161 |
| PRSS3     | 0.098923 | 0.18894  | 0.284286 |
| PRSS41    | 0.073616 | 0.328785 | 0.440754 |
| PRSS42    | -0.00821 | 0.913384 | 0.939516 |
| PRSS45    | 0.006043 | 0.93619  | 0.956556 |
| PRSS48    | 0.077713 | 0.302508 | 0.412793 |
| PRSS50    | 0.029782 | 0.693119 | 0.775168 |
| PRSS53    | 0.317808 | 1.54E-05 | 9.45E-05 |
| PRSS54    | -0.06087 | 0.419585 | 0.53177  |



|          |          |          |          |
|----------|----------|----------|----------|
| PRSS55   | 0.190185 | 0.010998 | 0.026793 |
| PRSS8    | 0.48872  | 4.48E-12 | 1.74E-10 |
| PRSSL1   | -0.18191 | 0.015092 | 0.035039 |
| PRTFDC1  | 0.091885 | 0.222526 | 0.324573 |
| PRTG     | -0.06924 | 0.358459 | 0.471602 |
| PRTN3    | -0.00848 | 0.910501 | 0.937379 |
| PRUNE2   | -0.37309 | 2.91E-07 | 2.98E-06 |
| PRUNE    | -0.26001 | 0.000457 | 0.001758 |
| PRX      | -0.10362 | 0.168693 | 0.259773 |
| PRY2     | -0.12765 | 0.089506 | 0.155676 |
| PSAPL1   | 0.267339 | 0.000309 | 0.00126  |
| PSAP     | -0.25303 | 0.000655 | 0.002385 |
| PSAT1    | -0.2251  | 0.00252  | 0.007616 |
| PSCA     | 0.651924 | 6.48E-23 | 4.58E-20 |
| PSD2     | 0.070505 | 0.349689 | 0.462216 |
| PSD3     | 0.079425 | 0.291948 | 0.401544 |
| PSD4     | 0.315505 | 1.79E-05 | 0.000108 |
| PSD      | -0.17484 | 0.019581 | 0.043621 |
| PSEN1    | 0.431778 | 1.77E-09 | 3.48E-08 |
| PSEN2    | -0.05131 | 0.496399 | 0.603937 |
| PSENEN   | 0.305691 | 3.33E-05 | 0.000185 |
| PSG10    | -0.03057 | 0.685416 | 0.769512 |
| PSG11    | 0.010717 | 0.887097 | 0.921391 |
| PSG1     | -0.12128 | 0.106834 | 0.180282 |
| PSG2     | -0.15638 | 0.03711  | 0.074841 |
| PSG3     | -0.04897 | 0.51623  | 0.622397 |
| PSG4     | 0.018267 | 0.808766 | 0.864555 |
| PSG5     | -0.01556 | 0.836657 | 0.884661 |
| PSG6     | 0.079053 | 0.294219 | 0.404104 |
| PSG7     | -0.04781 | 0.526293 | 0.63168  |
| PSG8     | -0.16385 | 0.028862 | 0.06061  |
| PSG9     | 0.091929 | 0.222302 | 0.324382 |
| PSIMCT-1 | -0.1577  | 0.035522 | 0.07219  |
| PSIP1    | -0.41773 | 6.58E-09 | 1.10E-07 |
| PSKH1    | -0.45872 | 1.20E-10 | 3.30E-09 |
| PSMA1    | 0.214407 | 0.004054 | 0.011463 |
| PSMA2    | 0.201343 | 0.007039 | 0.018332 |
| PSMA3    | 0.225324 | 0.002495 | 0.007544 |
| PSMA4    | 0.277111 | 0.000181 | 0.000792 |
| PSMA5    | 0.399267 | 3.38E-08 | 4.51E-07 |
| PSMA6    | 0.200832 | 0.007188 | 0.018616 |
| PSMA7    | 0.167555 | 0.025382 | 0.054289 |
| PSMA8    | -0.15498 | 0.038869 | 0.07777  |
| PSMB10   | 0.456375 | 1.53E-10 | 4.10E-09 |
| PSMB11   | -0.17522 | 0.019318 | 0.043117 |
| PSMB1    | 0.020326 | 0.7877   | 0.849408 |
| PSMB2    | 0.14603  | 0.051776 | 0.098871 |
| PSMB3    | 0.312278 | 2.20E-05 | 0.000128 |
| PSMB4    | 0.190831 | 0.010724 | 0.026223 |
| PSMB5    | -0.10197 | 0.175628 | 0.267984 |
| PSMB6    | -0.07457 | 0.322509 | 0.434328 |
| PSMB7    | 0.06824  | 0.365426 | 0.478682 |
| PSMB8    | 0.44302  | 5.92E-10 | 1.35E-08 |
| PSMB9    | 0.37219  | 3.13E-07 | 3.18E-06 |

|          |          |          |          |
|----------|----------|----------|----------|
| PSMC1    | 0.208063 | 0.005321 | 0.014439 |
| PSMC2    | 0.056976 | 0.450001 | 0.560815 |
| PSMC3IP  | 0.036579 | 0.627856 | 0.720864 |
| PSMC3    | 0.290998 | 8.13E-05 | 0.000397 |
| PSMC4    | 0.27299  | 0.000227 | 0.000965 |
| PSMC5    | 0.047621 | 0.527896 | 0.632874 |
| PSMC6    | 0.185284 | 0.013284 | 0.031456 |
| PSMD10   | -0.20129 | 0.007056 | 0.018356 |
| PSMD11   | 0.141488 | 0.059581 | 0.110948 |
| PSMD12   | 0.019864 | 0.792412 | 0.853022 |
| PSMD13   | 0.279707 | 0.000156 | 0.000701 |
| PSMD14   | 0.225829 | 0.002438 | 0.007396 |
| PSMD1    | 0.227334 | 0.002275 | 0.006978 |
| PSMD2    | 0.091684 | 0.22354  | 0.325715 |
| PSMD3    | 0.076067 | 0.312889 | 0.4238   |
| PSMD4    | 0.305459 | 3.38E-05 | 0.000187 |
| PSMD5    | -0.03049 | 0.686232 | 0.769919 |
| PSMD6    | -0.13839 | 0.065438 | 0.12019  |
| PSMD7    | 0.238914 | 0.00132  | 0.004358 |
| PSMD8    | 0.175707 | 0.018977 | 0.042483 |
| PSMD9    | 0.08362  | 0.267122 | 0.374775 |
| PSME1    | 0.38263  | 1.36E-07 | 1.52E-06 |
| PSME2    | 0.32914  | 7.26E-06 | 4.91E-05 |
| PSME3    | 0.197354 | 0.008278 | 0.021024 |
| PSME4    | 0.141942 | 0.058761 | 0.109689 |
| PSMF1    | -0.02977 | 0.693243 | 0.775262 |
| PSMG1    | 0.091894 | 0.22248  | 0.324573 |
| PSMG2    | 0.258683 | 0.000489 | 0.001868 |
| PSMG3    | 0.298449 | 5.20E-05 | 0.000271 |
| PSMG4    | 0.305309 | 3.41E-05 | 0.000189 |
| PSORS1C1 | 0.522967 | 6.96E-14 | 4.26E-12 |
| PSORS1C2 | 0.55653  | 7.27E-16 | 6.95E-14 |
| PSORS1C3 | 0.376596 | 2.21E-07 | 2.33E-06 |
| PSPC1    | 0.032007 | 0.671476 | 0.758297 |
| PSPH     | -0.36729 | 4.58E-07 | 4.41E-06 |
| PSPN     | -0.18175 | 0.01518  | 0.035198 |
| PSRC1    | 0.215351 | 0.003891 | 0.011051 |
| PSTK     | -0.18349 | 0.01422  | 0.033299 |
| PSTPIP1  | 0.04871  | 0.518487 | 0.624352 |
| PSTPIP2  | 0.172412 | 0.021374 | 0.046919 |
| PTAFR    | 0.102507 | 0.173334 | 0.265417 |
| PTAR1    | -0.32682 | 8.49E-06 | 5.62E-05 |
| PTBP1    | 0.150038 | 0.045611 | 0.089059 |
| PTBP2    | -0.10505 | 0.162842 | 0.252433 |
| PTCD1    | 0.100142 | 0.183522 | 0.277512 |
| PTCD2    | -0.01745 | 0.817175 | 0.870626 |
| PTCD3    | -0.13563 | 0.071054 | 0.128872 |
| PTCH1    | -0.27303 | 0.000227 | 0.000963 |
| PTCH2    | -0.04084 | 0.588316 | 0.686496 |
| PTCHD1   | -0.17771 | 0.017633 | 0.039927 |
| PTCHD2   | -0.24026 | 0.001237 | 0.004127 |
| PTCHD3   | 0.021178 | 0.779022 | 0.842921 |
| PTCRA    | 0.085725 | 0.255223 | 0.361621 |
| PTDSS1   | 0.0435   | 0.564247 | 0.664884 |

|         |          |          |          |
|---------|----------|----------|----------|
| PTDSS2  | -0.17669 | 0.018311 | 0.041177 |
| PTENP1  | -0.06045 | 0.422831 | 0.53504  |
| PTEN    | -0.11274 | 0.134036 | 0.215799 |
| PTER    | 0.21815  | 0.003441 | 0.009927 |
| PTF1A   | -0.14712 | 0.050036 | 0.096023 |
| PTGDR   | -0.13476 | 0.072912 | 0.131559 |
| PTGDS   | 0.087482 | 0.245574 | 0.350436 |
| PTGER1  | 0.284144 | 0.000121 | 0.000562 |
| PTGER2  | 0.102868 | 0.171817 | 0.263523 |
| PTGER3  | -0.12001 | 0.110567 | 0.1853   |
| PTGER4  | -0.18267 | 0.014667 | 0.034221 |
| PTGES2  | 0.012883 | 0.864478 | 0.905973 |
| PTGES3  | -0.0071  | 0.925014 | 0.948125 |
| PTGES   | 0.481279 | 1.04E-11 | 3.71E-10 |
| PTGFRN  | 0.267657 | 0.000304 | 0.00124  |
| PTGFR   | -0.2643  | 0.000364 | 0.001449 |
| PTGIR   | 0.147617 | 0.049256 | 0.094828 |
| PTGIS   | 0.165867 | 0.026918 | 0.057129 |
| PTGR1   | 0.177351 | 0.01787  | 0.040387 |
| PTGR2   | 0.023975 | 0.750747 | 0.821085 |
| PTGS1   | -0.08545 | 0.25674  | 0.363156 |
| PTGS2   | 0.311146 | 2.36E-05 | 0.000137 |
| PTH1R   | 0.09184  | 0.222751 | 0.324782 |
| PTH2R   | -0.02561 | 0.734387 | 0.808067 |
| PTH2    | -0.09415 | 0.211264 | 0.311491 |
| PTHLH   | 0.278273 | 0.000169 | 0.00075  |
| PTH     | -0.07673 | 0.308658 | 0.419104 |
| PTK2B   | 0.05406  | 0.473563 | 0.583369 |
| PTK2    | -0.01802 | 0.811295 | 0.866509 |
| PTK6    | 0.584501 | 1.08E-17 | 1.72E-15 |
| PTK7    | 0.196037 | 0.008728 | 0.021985 |
| PTMA    | 0.454684 | 1.82E-10 | 4.79E-09 |
| PTMS    | -0.11225 | 0.135762 | 0.218098 |
| PTN     | -0.0644  | 0.393055 | 0.505752 |
| PTOV1   | -0.00877 | 0.907522 | 0.935531 |
| PTP4A1  | -0.12089 | 0.107965 | 0.181817 |
| PTP4A2  | 0.146068 | 0.051714 | 0.098772 |
| PTP4A3  | -0.12195 | 0.10489  | 0.177576 |
| PTPDC1  | -0.32157 | 1.20E-05 | 7.63E-05 |
| PTPLAD1 | -0.11705 | 0.119723 | 0.197037 |
| PTPLAD2 | 0.143884 | 0.055351 | 0.104548 |
| PTPLA   | -0.1021  | 0.17505  | 0.267393 |
| PTPLB   | -0.09631 | 0.200965 | 0.299049 |
| PTPMT1  | 0.189661 | 0.011225 | 0.027271 |
| PTPN11  | -0.35573 | 1.10E-06 | 9.44E-06 |
| PTPN12  | 0.36246  | 6.63E-07 | 6.10E-06 |
| PTPN13  | -0.2575  | 0.000521 | 0.001967 |
| PTPN14  | 0.253831 | 0.000629 | 0.002307 |
| PTPN18  | 0.281515 | 0.000141 | 0.000641 |
| PTPN1   | -0.12837 | 0.087704 | 0.153217 |
| PTPN20A | 0.101395 | 0.178071 | 0.270901 |
| PTPN20B | 0.094936 | 0.207476 | 0.306876 |
| PTPN21  | -0.17871 | 0.016998 | 0.03871  |
| PTPN22  | 0.263163 | 0.000387 | 0.001525 |

|         |          |          |          |
|---------|----------|----------|----------|
| PTPN23  | 0.087963 | 0.242983 | 0.347616 |
| PTPN2   | 0.199169 | 0.007692 | 0.019749 |
| PTPN3   | -0.10832 | 0.150102 | 0.236391 |
| PTPN4   | 0.133459 | 0.075736 | 0.135838 |
| PTPN5   | -0.10622 | 0.158212 | 0.246597 |
| PTPN6   | -0.07239 | 0.336922 | 0.449215 |
| PTPN7   | 0.101212 | 0.178861 | 0.271893 |
| PTPN9   | 0.074846 | 0.320745 | 0.432634 |
| PTPRA   | -0.32996 | 6.87E-06 | 4.68E-05 |
| PTPRB   | -0.26647 | 0.000324 | 0.00131  |
| PTPRCAP | -0.00871 | 0.908094 | 0.935767 |
| PTPRC   | -0.07107 | 0.345842 | 0.458173 |
| PTPRD   | -0.28661 | 0.000105 | 0.000496 |
| PTPRE   | 0.237487 | 0.001413 | 0.004625 |
| PTPRF   | 0.100848 | 0.180433 | 0.2738   |
| PTPRG   | -0.14534 | 0.052909 | 0.100618 |
| PTPRH   | 0.457271 | 1.39E-10 | 3.77E-09 |
| PTPRJ   | -0.26001 | 0.000457 | 0.001758 |
| PTPRK   | 0.140452 | 0.061492 | 0.113943 |
| PTPRM   | -0.28112 | 0.000144 | 0.000653 |
| PTPRN2  | -0.37443 | 2.62E-07 | 2.71E-06 |
| PTPRN   | -0.25117 | 0.00072  | 0.002598 |
| PTPRO   | 0.103517 | 0.169112 | 0.260276 |
| PTPRQ   | -0.25441 | 0.000611 | 0.002251 |
| PTPRR   | 0.333902 | 5.24E-06 | 3.71E-05 |
| PTPRS   | -0.33258 | 5.74E-06 | 4.02E-05 |
| PTPRT   | -0.24658 | 0.000907 | 0.00316  |
| PTPRU   | 0.420273 | 5.21E-09 | 8.98E-08 |
| PTPRVP  | 0.051463 | 0.495101 | 0.603101 |
| PTPRZ1  | -0.1724  | 0.021383 | 0.046934 |
| PTRF    | 0.195812 | 0.008807 | 0.02215  |
| PTRH1   | 0.093008 | 0.216899 | 0.318148 |
| PTRH2   | 0.203223 | 0.006515 | 0.017165 |
| PTS     | 0.067888 | 0.367909 | 0.481417 |
| PTTG1IP | 0.578864 | 2.60E-17 | 3.72E-15 |
| PTTG1   | 0.341261 | 3.14E-06 | 2.36E-05 |
| PTTG2   | 0.007    | 0.92611  | 0.948806 |
| PTTG3P  | 0.20994  | 0.004914 | 0.013495 |
| PTX3    | -0.24129 | 0.001176 | 0.003948 |
| PTX4    | -0.0103  | 0.891424 | 0.924369 |
| PUF60   | 0.162002 | 0.030739 | 0.063975 |
| PUM1    | -0.16822 | 0.024797 | 0.053269 |
| PUM2    | -0.15359 | 0.040667 | 0.080811 |
| PURA    | -0.2447  | 0.000995 | 0.003423 |
| PURB    | -0.24822 | 0.000836 | 0.002946 |
| PURG    | 0.10289  | 0.171725 | 0.263436 |
| PUS10   | 0.091417 | 0.224899 | 0.327164 |
| PUS1    | 0.154642 | 0.039297 | 0.078539 |
| PUS3    | -0.0664  | 0.378539 | 0.491189 |
| PUS7L   | -0.29286 | 7.28E-05 | 0.00036  |
| PUS7    | -0.05916 | 0.432769 | 0.544513 |
| PUSL1   | 0.163532 | 0.029174 | 0.061164 |
| PVALB   | 0.095244 | 0.206    | 0.305195 |
| PVRIG   | -0.12411 | 0.098831 | 0.16891  |

|           |          |          |          |
|-----------|----------|----------|----------|
| PVRL1     | 0.030721 | 0.683947 | 0.768342 |
| PVRL2     | 0.31901  | 1.42E-05 | 8.83E-05 |
| PVRL3     | 0.125511 | 0.095051 | 0.16358  |
| PVRL4     | 0.584374 | 1.10E-17 | 1.74E-15 |
| PVR       | -0.03637 | 0.629828 | 0.722406 |
| PVT1      | 0.384636 | 1.15E-07 | 1.32E-06 |
| PWP1      | -0.0773  | 0.305084 | 0.415484 |
| PWP2      | 0.139307 | 0.06366  | 0.117446 |
| PWRN1     | -0.20227 | 0.006777 | 0.017762 |
| PWRN2     | -0.06249 | 0.407309 | 0.519588 |
| PWWP2A    | -0.16767 | 0.025277 | 0.054136 |
| PWWP2B    | 0.189861 | 0.011138 | 0.027093 |
| PXDNL     | 0.166635 | 0.026209 | 0.055853 |
| PXDN      | 0.039701 | 0.59878  | 0.695587 |
| PXK       | -0.35181 | 1.47E-06 | 1.21E-05 |
| PXMP2     | -0.07471 | 0.321644 | 0.433403 |
| PXMP4     | -0.22678 | 0.002334 | 0.007126 |
| PXN       | 0.244624 | 0.000999 | 0.003432 |
| PXT1      | 0.0455   | 0.546453 | 0.64906  |
| PYCARD    | 0.480348 | 1.16E-11 | 4.08E-10 |
| PYCR1     | 0.185678 | 0.013086 | 0.031064 |
| PYCR2     | 0.196222 | 0.008664 | 0.021843 |
| PYCRL     | 0.156272 | 0.037246 | 0.075062 |
| PYDC1     | 0.010901 | 0.885169 | 0.920114 |
| PYGB      | 0.35225  | 1.42E-06 | 1.18E-05 |
| PYGL      | 0.163242 | 0.029465 | 0.061701 |
| PYGM      | -0.02085 | 0.78237  | 0.845433 |
| PYG01     | -0.15624 | 0.037292 | 0.075146 |
| PYG02     | 0.153082 | 0.041348 | 0.081967 |
| PYHIN1    | -0.11952 | 0.112042 | 0.187232 |
| PYROXD1   | -0.07707 | 0.306561 | 0.416886 |
| PYROXD2   | 0.314091 | 1.96E-05 | 0.000116 |
| PYY2      | -0.2726  | 0.000232 | 0.000983 |
| PYY       | 0.039941 | 0.596571 | 0.693795 |
| PZP       | -0.14938 | 0.046583 | 0.090564 |
| ProSAPiP1 | 0.209102 | 0.005092 | 0.013913 |
| QARS      | 0.160263 | 0.032603 | 0.06714  |
| QDPR      | -0.39453 | 5.06E-08 | 6.45E-07 |
| QKI       | -0.04728 | 0.530843 | 0.635098 |
| QPCTL     | 0.289402 | 8.93E-05 | 0.000431 |
| QPCT      | -0.09433 | 0.210394 | 0.310519 |
| QPRT      | 0.036458 | 0.628997 | 0.721743 |
| QRFPR     | -0.02016 | 0.789366 | 0.850854 |
| QRFP      | -0.14116 | 0.060186 | 0.111864 |
| QRICH1    | -0.10887 | 0.148    | 0.233675 |
| QRICH2    | -0.24328 | 0.001067 | 0.003629 |
| QRSL1     | -0.22675 | 0.002337 | 0.007133 |
| QSER1     | -0.03061 | 0.685075 | 0.769348 |
| QSOX1     | 0.327529 | 8.09E-06 | 5.39E-05 |
| QSOX2     | -0.45479 | 1.80E-10 | 4.74E-09 |
| QTRT1     | -0.04308 | 0.568039 | 0.667919 |
| QTRTD1    | 0.122455 | 0.103446 | 0.175508 |
| R3HCC1    | -0.10411 | 0.16667  | 0.257198 |
| R3HDM1    | -0.29136 | 7.95E-05 | 0.000389 |

|           |          |          |          |
|-----------|----------|----------|----------|
| R3HDM2    | -0.29686 | 5.73E-05 | 0.000294 |
| R3HDM1    | 0.130345 | 0.082887 | 0.146392 |
| RAB10     | 0.264798 | 0.000354 | 0.001418 |
| RAB11A    | 0.38002  | 1.68E-07 | 1.84E-06 |
| RAB11B    | 0.089498 | 0.234824 | 0.338787 |
| RAB11FIP1 | 0.284373 | 0.00012  | 0.000556 |
| RAB11FIP2 | -0.24144 | 0.001167 | 0.003923 |
| RAB11FIP3 | -0.45734 | 1.38E-10 | 3.74E-09 |
| RAB11FIP4 | 0.065044 | 0.388361 | 0.500943 |
| RAB11FIP5 | 0.431162 | 1.88E-09 | 3.65E-08 |
| RAB12     | 0.022055 | 0.770124 | 0.836405 |
| RAB13     | 0.246539 | 0.000909 | 0.003165 |
| RAB14     | -0.1203  | 0.10972  | 0.18414  |
| RAB15     | -0.0654  | 0.385732 | 0.498462 |
| RAB17     | 0.023152 | 0.759031 | 0.827988 |
| RAB18     | -0.22025 | 0.003135 | 0.009168 |
| RAB19     | -0.08329 | 0.269018 | 0.37666  |
| RAB1A     | 0.085653 | 0.255624 | 0.362033 |
| RAB1B     | 0.374674 | 2.57E-07 | 2.68E-06 |
| RAB20     | 0.356607 | 1.03E-06 | 8.91E-06 |
| RAB21     | -0.21435 | 0.004065 | 0.011486 |
| RAB22A    | 0.001278 | 0.98649  | 0.990447 |
| RAB23     | -0.11821 | 0.116066 | 0.19225  |
| RAB24     | 0.040472 | 0.591694 | 0.689177 |
| RAB25     | 0.479354 | 1.29E-11 | 4.48E-10 |
| RAB26     | -0.28521 | 0.000114 | 0.000533 |
| RAB27A    | -0.16763 | 0.025319 | 0.054195 |
| RAB27B    | 0.315078 | 1.84E-05 | 0.00011  |
| RAB28     | -0.26746 | 0.000307 | 0.001252 |
| RAB2A     | -0.11403 | 0.12962  | 0.209969 |
| RAB2B     | -0.21298 | 0.004312 | 0.012053 |
| RAB30     | -0.2325  | 0.001791 | 0.00567  |
| RAB31     | 0.160809 | 0.032007 | 0.066107 |
| RAB32     | 0.296799 | 5.75E-05 | 0.000295 |
| RAB33A    | -0.03894 | 0.605859 | 0.701831 |
| RAB33B    | -0.27282 | 0.000229 | 0.000972 |
| RAB34     | 0.289266 | 9.00E-05 | 0.000434 |
| RAB35     | -0.16199 | 0.03075  | 0.063991 |
| RAB36     | -0.47197 | 2.92E-11 | 9.46E-10 |
| RAB37     | -0.0841  | 0.264403 | 0.371672 |
| RAB38     | 0.383196 | 1.30E-07 | 1.46E-06 |
| RAB39B    | -0.38173 | 1.46E-07 | 1.63E-06 |
| RAB39     | -0.44168 | 6.76E-10 | 1.51E-08 |
| RAB3A     | -0.24178 | 0.001149 | 0.003873 |
| RAB3B     | -0.25506 | 0.000591 | 0.002189 |
| RAB3C     | -0.38951 | 7.71E-08 | 9.30E-07 |
| RAB3D     | -0.17403 | 0.020165 | 0.044727 |
| RAB3GAP1  | -0.04715 | 0.532008 | 0.636145 |
| RAB3GAP2  | -0.15156 | 0.043442 | 0.085501 |
| RAB3IL1   | 0.130096 | 0.083481 | 0.147231 |
| RAB3IP    | -0.26597 | 0.000333 | 0.00134  |
| RAB40AL   | -0.02125 | 0.77831  | 0.842612 |
| RAB40A    | 0.017757 | 0.814005 | 0.868278 |
| RAB40B    | -0.03219 | 0.669675 | 0.756868 |

|          |          |          |          |
|----------|----------|----------|----------|
| RAB40C   | 0.006825 | 0.92796  | 0.950159 |
| RAB41    | -0.0925  | 0.219409 | 0.320985 |
| RAB42    | 0.273199 | 0.000225 | 0.000955 |
| RAB43    | 0.195104 | 0.009059 | 0.022665 |
| RAB4A    | -0.0438  | 0.561558 | 0.662466 |
| RAB4B    | 0.111687 | 0.137747 | 0.220694 |
| RAB5A    | 0.169249 | 0.023916 | 0.051674 |
| RAB5B    | -0.04317 | 0.567181 | 0.667173 |
| RAB5C    | 0.270212 | 0.000265 | 0.001101 |
| RAB6A    | 0.178337 | 0.017234 | 0.039162 |
| RAB6B    | -0.22046 | 0.003105 | 0.009099 |
| RAB6C    | 0.069429 | 0.35711  | 0.470296 |
| RAB7A    | 0.195591 | 0.008885 | 0.022293 |
| RAB7L1   | 0.103783 | 0.168014 | 0.259029 |
| RAB8A    | 0.468845 | 4.10E-11 | 1.29E-09 |
| RAB8B    | -0.00186 | 0.980308 | 0.986293 |
| RAB9A    | 0.239909 | 0.001258 | 0.004189 |
| RAB9B    | -0.29369 | 6.92E-05 | 0.000346 |
| RABAC1   | 0.09626  | 0.201181 | 0.299267 |
| RABEP1   | -0.46202 | 8.49E-11 | 2.43E-09 |
| RABEP2   | 0.143984 | 0.05518  | 0.104294 |
| RABEPK   | -0.05629 | 0.455515 | 0.5665   |
| RABGAP1L | 0.056576 | 0.453193 | 0.564145 |
| RABGAP1  | -0.1032  | 0.170415 | 0.261873 |
| RABGEF1  | -0.21191 | 0.004517 | 0.012551 |
| RABGGTA  | 0.030171 | 0.68931  | 0.772504 |
| RABGGTB  | -0.20118 | 0.007087 | 0.018413 |
| RABIF    | 0.24629  | 0.00092  | 0.003195 |
| RABL2A   | 0.098044 | 0.192919 | 0.289152 |
| RABL2B   | -0.18558 | 0.013137 | 0.031173 |
| RABL3    | -0.20923 | 0.005064 | 0.013839 |
| RABL5    | -0.2077  | 0.005404 | 0.014621 |
| RAC1     | 0.552552 | 1.28E-15 | 1.15E-13 |
| RAC2     | 0.402021 | 2.66E-08 | 3.67E-07 |
| RAC3     | -0.05258 | 0.485738 | 0.594624 |
| RACGAP1P | 0.162072 | 0.030665 | 0.063849 |
| RACGAP1  | 0.205861 | 0.005838 | 0.015622 |
| RAD17    | -0.28644 | 0.000106 | 0.0005   |
| RAD18    | 0.150856 | 0.044431 | 0.087108 |
| RAD1     | -0.41446 | 8.85E-09 | 1.43E-07 |
| RAD21L1  | -0.05161 | 0.493886 | 0.602177 |
| RAD21    | -0.16594 | 0.026853 | 0.057022 |
| RAD23A   | 0.33962  | 3.52E-06 | 2.62E-05 |
| RAD23B   | -0.22818 | 0.002188 | 0.006743 |
| RAD50    | -0.06998 | 0.353319 | 0.466141 |
| RAD51AP1 | 0.177927 | 0.017496 | 0.039635 |
| RAD51AP2 | 0.005631 | 0.940535 | 0.960034 |
| RAD51C   | -0.2772  | 0.00018  | 0.000789 |
| RAD51L1  | 0.26059  | 0.000443 | 0.001713 |
| RAD51L3  | -0.18984 | 0.011149 | 0.02711  |
| RAD51    | 0.421856 | 4.50E-09 | 7.91E-08 |
| RAD52    | -0.19921 | 0.00768  | 0.019723 |
| RAD54B   | 0.140758 | 0.060922 | 0.11303  |
| RAD54L2  | -0.27225 | 0.000237 | 0.001    |

|          |          |          |          |
|----------|----------|----------|----------|
| RAD54L   | 0.35963  | 8.21E-07 | 7.33E-06 |
| RAD9A    | 0.255958 | 0.000564 | 0.002106 |
| RAD9B    | -0.0799  | 0.289048 | 0.398413 |
| RADIL    | -0.31672 | 1.65E-05 | 0.0001   |
| RAE1     | -0.12481 | 0.096921 | 0.166292 |
| RAET1E   | 0.342678 | 2.84E-06 | 2.17E-05 |
| RAET1G   | 0.261226 | 0.000428 | 0.001665 |
| RAET1K   | 0.055342 | 0.463124 | 0.573402 |
| RAET1L   | 0.337476 | 4.09E-06 | 2.98E-05 |
| RAF1     | 0.080325 | 0.286498 | 0.395587 |
| RAG1AP1  | 0.313739 | 2.00E-05 | 0.000119 |
| RAG1     | 0.119607 | 0.111782 | 0.186877 |
| RAG2     | -0.10366 | 0.168529 | 0.25962  |
| RAGE     | 0.148264 | 0.048259 | 0.093191 |
| RAI14    | 0.099647 | 0.185707 | 0.280169 |
| RAI1     | -0.07311 | 0.332139 | 0.444395 |
| RAI2     | -0.23516 | 0.001579 | 0.005096 |
| RALA     | 0.353695 | 1.28E-06 | 1.07E-05 |
| RALBP1   | 0.240697 | 0.001211 | 0.00405  |
| RALB     | 0.504658 | 6.84E-13 | 3.26E-11 |
| RALGAPA1 | -0.44609 | 4.36E-10 | 1.03E-08 |
| RALGAPA2 | -0.23015 | 0.001998 | 0.006226 |
| RALGAPB  | -0.25206 | 0.000688 | 0.002494 |
| RALGDS   | -0.15962 | 0.033318 | 0.068435 |
| RALGPS1  | -0.14953 | 0.046357 | 0.090193 |
| RALGPS2  | 0.082309 | 0.274718 | 0.382629 |
| RALYL    | -0.05819 | 0.440426 | 0.552228 |
| RALY     | 0.352543 | 1.39E-06 | 1.15E-05 |
| RAMP1    | 0.060118 | 0.425364 | 0.537659 |
| RAMP2    | -0.16392 | 0.02879  | 0.060472 |
| RAMP3    | -0.14512 | 0.053271 | 0.101206 |
| RANBP10  | -0.23303 | 0.001746 | 0.005549 |
| RANBP17  | -0.00365 | 0.961423 | 0.973733 |
| RANBP1   | 0.110406 | 0.142345 | 0.226557 |
| RANBP2   | -0.44732 | 3.86E-10 | 9.27E-09 |
| RANBP3L  | -0.1439  | 0.055325 | 0.104508 |
| RANBP3   | -0.10215 | 0.174863 | 0.267257 |
| RANBP6   | -0.19936 | 0.007632 | 0.019619 |
| RANBP9   | -0.16765 | 0.025295 | 0.054165 |
| RANGAP1  | 0.14879  | 0.047461 | 0.092009 |
| RANGRF   | -0.07144 | 0.343328 | 0.455605 |
| RAN      | 0.028532 | 0.705382 | 0.785284 |
| RAP1A    | 0.066888 | 0.375019 | 0.488063 |
| RAP1B    | 0.038184 | 0.612833 | 0.708333 |
| RAP1GAP2 | -0.41813 | 6.34E-09 | 1.07E-07 |
| RAP1GAP  | -0.11822 | 0.11602  | 0.192207 |
| RAP1GDS1 | 0.05125  | 0.496889 | 0.604459 |
| RAP2A    | -0.32814 | 7.77E-06 | 5.22E-05 |
| RAP2B    | 0.38282  | 1.34E-07 | 1.50E-06 |
| RAP2C    | 0.161087 | 0.031708 | 0.065565 |
| RAPGEF1  | -0.41582 | 7.82E-09 | 1.28E-07 |
| RAPGEF2  | -0.33108 | 6.36E-06 | 4.39E-05 |
| RAPGEF3  | 0.17991  | 0.01626  | 0.037343 |
| RAPGEF4  | -0.40225 | 2.61E-08 | 3.61E-07 |



|          |          |          |          |
|----------|----------|----------|----------|
| RAPGEF5  | -0.08541 | 0.256958 | 0.36335  |
| RAPGEF6  | -0.26941 | 0.000276 | 0.001143 |
| RAPGEFL1 | 0.61969  | 2.92E-20 | 8.87E-18 |
| RAPH1    | 0.334108 | 5.17E-06 | 3.66E-05 |
| RAPSN    | 0.109862 | 0.144334 | 0.229003 |
| RARA     | 0.328894 | 7.38E-06 | 4.98E-05 |
| RARB     | 0.13568  | 0.070948 | 0.128709 |
| RARG     | 0.555826 | 8.05E-16 | 7.61E-14 |
| RARRES1  | 0.113762 | 0.130536 | 0.211178 |
| RARRES2  | 0.163172 | 0.029537 | 0.061831 |
| RARRES3  | 0.49193  | 3.09E-12 | 1.26E-10 |
| RARS2    | -0.25256 | 0.000671 | 0.002437 |
| RARS     | 0.227323 | 0.002277 | 0.00698  |
| RASA1    | 0.099875 | 0.184697 | 0.278952 |
| RASA2    | 0.073868 | 0.327126 | 0.439082 |
| RASA3    | 0.378404 | 1.91E-07 | 2.06E-06 |
| RASA4P   | -0.27836 | 0.000168 | 0.000747 |
| RASA4    | -0.35196 | 1.45E-06 | 1.20E-05 |
| RASAL1   | 0.524793 | 5.50E-14 | 3.46E-12 |
| RASAL2   | 0.125619 | 0.094764 | 0.163157 |
| RASAL3   | 0.030655 | 0.684598 | 0.768986 |
| RASD1    | -0.34678 | 2.12E-06 | 1.67E-05 |
| RASD2    | -0.00664 | 0.929947 | 0.951603 |
| RASEF    | 0.224986 | 0.002533 | 0.007648 |
| RASGEF1A | -0.0368  | 0.625738 | 0.719339 |
| RASGEF1B | -0.24975 | 0.000774 | 0.002766 |
| RASGEF1C | -0.16311 | 0.0296   | 0.061951 |
| RASGRF1  | -0.12438 | 0.098083 | 0.167937 |
| RASGRF2  | -0.05161 | 0.493836 | 0.602153 |
| RASGRP1  | 0.03204  | 0.671158 | 0.758023 |
| RASGRP2  | -0.03548 | 0.638268 | 0.729713 |
| RASGRP3  | -0.00241 | 0.974581 | 0.982631 |
| RASGRP4  | -0.06858 | 0.363038 | 0.476295 |
| RASIP1   | -0.21762 | 0.003522 | 0.010125 |
| RASL10A  | 0.002184 | 0.976917 | 0.984084 |
| RASL10B  | -0.15691 | 0.036473 | 0.07379  |
| RASL11A  | -0.05983 | 0.427582 | 0.539704 |
| RASL11B  | 0.063483 | 0.399872 | 0.512415 |
| RASL12   | 0.036701 | 0.626707 | 0.719958 |
| RASSF10  | 0.11915  | 0.113169 | 0.188605 |
| RASSF1   | 0.140672 | 0.061082 | 0.113306 |
| RASSF2   | -0.09697 | 0.197859 | 0.295213 |
| RASSF3   | 0.00935  | 0.901424 | 0.931111 |
| RASSF4   | -0.07787 | 0.301517 | 0.411668 |
| RASSF5   | 0.257525 | 0.00052  | 0.001965 |
| RASSF6   | 0.165231 | 0.027518 | 0.058196 |
| RASSF7   | 0.429306 | 2.24E-09 | 4.27E-08 |
| RASSF8   | -0.07133 | 0.344037 | 0.456392 |
| RASSF9   | 0.151308 | 0.043789 | 0.086064 |
| RAVER1   | 0.096951 | 0.197954 | 0.295333 |
| RAVER2   | -0.18597 | 0.012942 | 0.030759 |
| RAX2     | 0.07619  | 0.312109 | 0.423005 |
| RAX      | 0.032858 | 0.663269 | 0.751561 |
| RB1CC1   | -0.27716 | 0.00018  | 0.000791 |

|        |          |          |          |
|--------|----------|----------|----------|
| RB1    | -0.07948 | 0.291629 | 0.40125  |
| RBAK   | -0.3926  | 5.95E-08 | 7.41E-07 |
| RBBP4  | -0.2551  | 0.000589 | 0.002185 |
| RBBP5  | -0.24601 | 0.000933 | 0.003234 |
| RBBP6  | -0.23219 | 0.001817 | 0.005744 |
| RBBP7  | 0.157653 | 0.03558  | 0.072293 |
| RBBP8  | 0.154229 | 0.039831 | 0.079401 |
| RBBP9  | -0.21851 | 0.003386 | 0.009787 |
| RBCK1  | 0.177295 | 0.017907 | 0.040454 |
| RBKS   | 0.025594 | 0.734526 | 0.80813  |
| RBL1   | -0.20609 | 0.005781 | 0.01549  |
| RBL2   | -0.2521  | 0.000687 | 0.00249  |
| RBM10  | -0.17364 | 0.020449 | 0.045255 |
| RBM11  | -0.35459 | 1.20E-06 | 1.01E-05 |
| RBM12B | -0.14402 | 0.055117 | 0.104185 |
| RBM12  | -0.26647 | 0.000324 | 0.00131  |
| RBM14  | -0.21773 | 0.003506 | 0.010085 |
| RBM15B | -0.22841 | 0.002165 | 0.006685 |
| RBM15  | 0.037028 | 0.62364  | 0.717457 |
| RBM16  | -0.39268 | 5.91E-08 | 7.37E-07 |
| RBM17  | 0.060924 | 0.419176 | 0.5314   |
| RBM18  | -0.37608 | 2.30E-07 | 2.42E-06 |
| RBM19  | -0.21164 | 0.004569 | 0.012679 |
| RBM20  | -0.35732 | 9.76E-07 | 8.50E-06 |
| RBM22  | -0.05712 | 0.448873 | 0.559931 |
| RBM23  | -0.45335 | 2.09E-10 | 5.37E-09 |
| RBM24  | -0.22332 | 0.002731 | 0.008152 |
| RBM25  | 0.000485 | 0.994876 | 0.9965   |
| RBM26  | -0.16722 | 0.025679 | 0.05486  |
| RBM27  | -0.17563 | 0.019027 | 0.04258  |
| RBM28  | -0.20227 | 0.006777 | 0.017762 |
| RBM33  | -0.02126 | 0.778204 | 0.842612 |
| RBM34  | 0.313583 | 2.02E-05 | 0.00012  |
| RBM38  | -0.08233 | 0.274583 | 0.382508 |
| RBM39  | -0.01603 | 0.831788 | 0.880832 |
| RBM3   | 0.199788 | 0.007501 | 0.019344 |
| RBM41  | 0.23687  | 0.001456 | 0.004745 |
| RBM42  | 0.316047 | 1.73E-05 | 0.000104 |
| RBM43  | 0.043598 | 0.563364 | 0.664082 |
| RBM44  | 0.22606  | 0.002412 | 0.007329 |
| RBM45  | 0.127234 | 0.090563 | 0.157184 |
| RBM46  | -0.02748 | 0.71577  | 0.79332  |
| RBM47  | 0.077057 | 0.306616 | 0.416932 |
| RBM4B  | -0.20973 | 0.004958 | 0.013602 |
| RBM4   | -0.03875 | 0.607537 | 0.70328  |
| RBM5   | -0.1009  | 0.180213 | 0.273533 |
| RBM6   | -0.03327 | 0.659304 | 0.747839 |
| RBM7   | 0.000335 | 0.996463 | 0.997472 |
| RBM8A  | 0.245127 | 0.000974 | 0.003359 |
| RBM9   | -0.13012 | 0.083436 | 0.147165 |
| RBMS1  | 0.254871 | 0.000596 | 0.002207 |
| RBMS2  | 0.233451 | 0.001712 | 0.005463 |
| RBMS3  | -0.04331 | 0.565935 | 0.666436 |
| RBMX2  | -0.01856 | 0.805724 | 0.862423 |

|         |          |          |          |
|---------|----------|----------|----------|
| RBMXL1  | 0.081365 | 0.280281 | 0.388722 |
| RBMXL2  | 0.000822 | 0.991314 | 0.993626 |
| RBMXL3  | 0.031408 | 0.677277 | 0.762824 |
| RBMX    | -0.21003 | 0.004895 | 0.013453 |
| RBMX1A1 | -0.11088 | 0.140624 | 0.224322 |
| RBP1    | 0.165909 | 0.026879 | 0.057072 |
| RBP2    | 0.032273 | 0.668905 | 0.75617  |
| RBP3    | 0.336094 | 4.51E-06 | 3.25E-05 |
| RBP4    | 0.107514 | 0.153162 | 0.240432 |
| RBP5    | -0.16835 | 0.024688 | 0.053088 |
| RBP7    | -0.23452 | 0.001627 | 0.00523  |
| RBPJL   | -0.10963 | 0.145193 | 0.230126 |
| RBPJ    | -0.27775 | 0.000174 | 0.000769 |
| RBPMS2  | -0.0046  | 0.95139  | 0.966989 |
| RBPMS   | 0.339557 | 3.54E-06 | 2.63E-05 |
| RBX1    | 0.237518 | 0.001411 | 0.004621 |
| RC3H1   | -0.27182 | 0.000242 | 0.001019 |
| RC3H2   | -0.1903  | 0.010948 | 0.026698 |
| RCAN1   | -0.18119 | 0.015503 | 0.035818 |
| RCAN2   | -0.31378 | 2.00E-05 | 0.000118 |
| RCAN3   | -0.15317 | 0.041231 | 0.081767 |
| RCBTB1  | -0.31552 | 1.79E-05 | 0.000107 |
| RCBTB2  | 0.021202 | 0.778779 | 0.842902 |
| RCC1    | 0.362229 | 6.75E-07 | 6.19E-06 |
| RCC2    | 0.31641  | 1.69E-05 | 0.000102 |
| RCCD1   | 0.25338  | 0.000644 | 0.002351 |
| RCE1    | 0.477404 | 1.61E-11 | 5.45E-10 |
| RCHY1   | -0.4728  | 2.67E-11 | 8.67E-10 |
| RCL1    | -0.0951  | 0.206686 | 0.305937 |
| RCN1    | -0.08851 | 0.240026 | 0.344332 |
| RCN2    | -0.05737 | 0.446864 | 0.558023 |
| RCN3    | 0.183951 | 0.013974 | 0.032797 |
| RCOR1   | 0.226301 | 0.002386 | 0.007257 |
| RCOR2   | 0.081751 | 0.277996 | 0.38614  |
| RCOR3   | -0.06506 | 0.38827  | 0.500888 |
| RCS1    | -0.10854 | 0.149255 | 0.235413 |
| RCVRN   | -0.05191 | 0.491373 | 0.599926 |
| RD3     | -0.07109 | 0.345679 | 0.457987 |
| RDBP    | 0.150083 | 0.045544 | 0.088947 |
| RDH10   | 0.199945 | 0.007453 | 0.019234 |
| RDH11   | -0.24999 | 0.000764 | 0.002734 |
| RDH12   | -0.20134 | 0.007041 | 0.018333 |
| RDH13   | 0.471297 | 3.14E-11 | 1.01E-09 |
| RDH14   | -0.02228 | 0.767848 | 0.834713 |
| RDH16   | 0.004398 | 0.953542 | 0.968331 |
| RDH5    | 0.139324 | 0.063629 | 0.117402 |
| RDH8    | -0.11038 | 0.142431 | 0.226638 |
| RDM1    | 0.33671  | 4.32E-06 | 3.13E-05 |
| RDX     | -0.1365  | 0.069252 | 0.126083 |
| REC8    | -0.05276 | 0.48425  | 0.593278 |
| RECK    | -0.23281 | 0.001764 | 0.005602 |
| RECQL4  | 0.23585  | 0.001528 | 0.004949 |
| RECQL5  | 0.215708 | 0.003831 | 0.010906 |
| RECQL   | 0.012837 | 0.864952 | 0.906293 |

|         |          |          |          |
|---------|----------|----------|----------|
| REEP1   | 0.033695 | 0.65523  | 0.744328 |
| REEP2   | -0.26149 | 0.000422 | 0.001645 |
| REEP3   | 0.264316 | 0.000364 | 0.001449 |
| REEP4   | 0.243959 | 0.001032 | 0.003527 |
| REEP5   | -0.15212 | 0.042651 | 0.084161 |
| REEP6   | 0.191886 | 0.01029  | 0.025291 |
| REG1A   | 0.091613 | 0.223903 | 0.3261   |
| REG1B   | -0.00746 | 0.921264 | 0.945408 |
| REG1P   | -0.04944 | 0.512255 | 0.618435 |
| REG3A   | -0.01219 | 0.871674 | 0.911292 |
| REG3G   | -0.0413  | 0.584132 | 0.682702 |
| REG4    | 0.251776 | 0.000698 | 0.002527 |
| RELA    | 0.515279 | 1.85E-13 | 1.04E-11 |
| RELB    | 0.359818 | 8.10E-07 | 7.24E-06 |
| RELL1   | 0.076738 | 0.308627 | 0.41909  |
| RELL2   | 0.155615 | 0.038061 | 0.076424 |
| RELN    | -0.27522 | 0.000201 | 0.000869 |
| RELT    | 0.251452 | 0.00071  | 0.002563 |
| REL     | -0.06299 | 0.403523 | 0.516157 |
| REM1    | 0.013136 | 0.861838 | 0.904036 |
| REM2    | -0.19927 | 0.007661 | 0.019688 |
| RENBP   | 0.143859 | 0.055393 | 0.104604 |
| REN     | 0.078605 | 0.29697  | 0.406836 |
| REP15   | 0.003582 | 0.962156 | 0.974276 |
| REPIN1  | -0.30753 | 2.97E-05 | 0.000167 |
| REPS1   | -0.372   | 3.17E-07 | 3.21E-06 |
| REPS2   | 0.365041 | 5.45E-07 | 5.13E-06 |
| RER1    | 0.287741 | 9.84E-05 | 0.000468 |
| RERE    | -0.23079 | 0.001939 | 0.006072 |
| RERGL   | -0.03508 | 0.642019 | 0.732942 |
| REG     | -0.00017 | 0.998239 | 0.99859  |
| RESP18  | -0.10553 | 0.160934 | 0.250044 |
| REST    | -0.03355 | 0.656576 | 0.745343 |
| RETNLB  | -0.09754 | 0.195221 | 0.291983 |
| RETN    | 0.311748 | 2.28E-05 | 0.000132 |
| RETSAT  | 0.366553 | 4.85E-07 | 4.62E-06 |
| RET     | -0.39726 | 4.01E-08 | 5.23E-07 |
| REV1    | 0.027603 | 0.714557 | 0.792332 |
| REV3L   | -0.49601 | 1.92E-12 | 8.36E-11 |
| REX01L1 | -0.03041 | 0.686965 | 0.770463 |
| REX01   | 0.10362  | 0.168687 | 0.259773 |
| REX02   | 0.286533 | 0.000106 | 0.000498 |
| REX04   | -0.09461 | 0.209074 | 0.308778 |
| RFC1    | -0.4389  | 8.89E-10 | 1.91E-08 |
| RFC2    | 0.115585 | 0.124445 | 0.203218 |
| RFC3    | -0.01294 | 0.863864 | 0.905681 |
| RFC4    | 0.229613 | 0.002048 | 0.006361 |
| RFC5    | -0.10261 | 0.172887 | 0.264869 |
| RFESD   | -0.30147 | 4.33E-05 | 0.000232 |
| RFFL    | 0.136654 | 0.068929 | 0.125623 |
| RFK     | -0.13429 | 0.073914 | 0.133112 |
| RFNG    | 0.154849 | 0.039031 | 0.078064 |
| RFPL1S  | -0.22363 | 0.002694 | 0.008058 |
| RFPL1   | -0.21868 | 0.003361 | 0.009721 |

|         |          |          |          |
|---------|----------|----------|----------|
| RFPL2   | -0.28686 | 0.000104 | 0.00049  |
| RFPL3S  | -0.05275 | 0.484323 | 0.593297 |
| RFPL3   | -0.00072 | 0.992425 | 0.994538 |
| RFPL4A  | -0.24094 | 0.001196 | 0.004007 |
| RFPL4B  | -0.01186 | 0.875104 | 0.913397 |
| RFT1    | -0.02357 | 0.754869 | 0.824456 |
| RFTN1   | 0.042201 | 0.575944 | 0.675207 |
| RFTN2   | -0.09045 | 0.229851 | 0.333095 |
| RFWD2   | 0.330505 | 6.62E-06 | 4.54E-05 |
| RFWD3   | -0.056   | 0.457777 | 0.568706 |
| RFX1    | -0.00533 | 0.943707 | 0.961999 |
| RFX2    | -0.34567 | 2.29E-06 | 1.79E-05 |
| RFX3    | -0.3521  | 1.44E-06 | 1.19E-05 |
| RFX4    | -0.08679 | 0.249321 | 0.354834 |
| RFX5    | -0.0419  | 0.578682 | 0.677613 |
| RFX6    | -0.26029 | 0.00045  | 0.001736 |
| RFX7    | -0.13702 | 0.068173 | 0.124438 |
| RFX8    | 0.276038 | 0.000192 | 0.000835 |
| RFXANK  | 0.321038 | 1.25E-05 | 7.87E-05 |
| RFXAP   | -0.47324 | 2.54E-11 | 8.27E-10 |
| RG9MTD1 | 0.078763 | 0.296002 | 0.406046 |
| RG9MTD2 | -0.31628 | 1.70E-05 | 0.000103 |
| RG9MTD3 | -0.22869 | 0.002137 | 0.006612 |
| RGAG1   | -0.3363  | 4.44E-06 | 3.21E-05 |
| RGAG4   | -0.3021  | 4.16E-05 | 0.000224 |
| RGL1    | -0.32502 | 9.58E-06 | 6.26E-05 |
| RGL2    | 0.049935 | 0.508009 | 0.614716 |
| RGL3    | 0.102549 | 0.173156 | 0.265178 |
| RGL4    | -0.13063 | 0.082203 | 0.145405 |
| RGMA    | -0.06265 | 0.406061 | 0.51843  |
| RGMB    | -0.3301  | 6.80E-06 | 4.64E-05 |
| RGNEF   | -0.02921 | 0.69869  | 0.779811 |
| RGN     | -0.13314 | 0.076438 | 0.136885 |
| RGP1    | -0.20607 | 0.005786 | 0.015498 |
| RGPD1   | -0.26915 | 0.00028  | 0.001158 |
| RGPD3   | -0.41148 | 1.16E-08 | 1.79E-07 |
| RGPD4   | -0.27512 | 0.000202 | 0.000873 |
| RGPD5   | -0.29279 | 7.31E-05 | 0.000362 |
| RGPD6   | -0.36942 | 3.88E-07 | 3.83E-06 |
| RGPD8   | -0.00149 | 0.984247 | 0.989099 |
| RGR     | -0.18624 | 0.01281  | 0.030523 |
| RGS10   | 0.215004 | 0.003951 | 0.011205 |
| RGS11   | -0.13449 | 0.073488 | 0.132409 |
| RGS12   | 0.150565 | 0.044847 | 0.087812 |
| RGS13   | 0.059843 | 0.427493 | 0.539627 |
| RGS14   | 0.232602 | 0.001782 | 0.005647 |
| RGS16   | 0.131933 | 0.079177 | 0.140922 |
| RGS17   | -0.20583 | 0.005845 | 0.01564  |
| RGS18   | -0.1419  | 0.058827 | 0.109782 |
| RGS19   | 0.262567 | 0.000399 | 0.001568 |
| RGS1    | 0.165696 | 0.027078 | 0.057395 |
| RGS20   | 0.209029 | 0.005108 | 0.013953 |
| RGS21   | 0.080693 | 0.284284 | 0.393162 |
| RGS22   | -0.36924 | 3.94E-07 | 3.87E-06 |

|         |          |          |          |
|---------|----------|----------|----------|
| RGS2    | -0.09779 | 0.194069 | 0.290611 |
| RGS3    | 0.368098 | 4.30E-07 | 4.17E-06 |
| RGS4    | -0.19659 | 0.008538 | 0.021592 |
| RGS5    | -0.15104 | 0.044168 | 0.086661 |
| RGS6    | 0.167744 | 0.025214 | 0.054008 |
| RGS7BP  | -0.30391 | 3.72E-05 | 0.000203 |
| RGS7    | -0.3406  | 3.29E-06 | 2.46E-05 |
| RGS8    | 0.049089 | 0.515234 | 0.62131  |
| RGS9BP  | 0.067056 | 0.373825 | 0.486893 |
| RGS9    | -0.24466 | 0.000997 | 0.003426 |
| RGSL1   | -0.14568 | 0.052353 | 0.099755 |
| RHAG    | -0.05972 | 0.428426 | 0.54051  |
| RHBDD1  | 0.001877 | 0.980162 | 0.986267 |
| RHBDD2  | -0.09343 | 0.214825 | 0.315692 |
| RHBDD3  | -0.08247 | 0.273775 | 0.381887 |
| RHBDF1  | 0.586103 | 8.35E-18 | 1.36E-15 |
| RHBDF2  | 0.419539 | 5.57E-09 | 9.52E-08 |
| RHBDL1  | 0.18005  | 0.016176 | 0.037164 |
| RHBDL2  | 0.565262 | 2.04E-16 | 2.30E-14 |
| RHBDL3  | -0.42039 | 5.15E-09 | 8.89E-08 |
| RHBG    | -0.05668 | 0.452391 | 0.563324 |
| RHCE    | -0.38196 | 1.43E-07 | 1.60E-06 |
| RHCG    | 0.091363 | 0.225173 | 0.327492 |
| RHD     | -0.04476 | 0.55299  | 0.654869 |
| RHEBL1  | 0.101127 | 0.179225 | 0.272301 |
| RHEB    | -0.025   | 0.740464 | 0.812847 |
| RHOA    | 0.363659 | 6.05E-07 | 5.61E-06 |
| RHOBTB1 | 0.089633 | 0.234116 | 0.338135 |
| RHOBTB2 | 0.00222  | 0.976541 | 0.983905 |
| RHOBTB3 | -0.26797 | 0.000299 | 0.001224 |
| RHOB    | 0.228379 | 0.002169 | 0.006694 |
| RHOC    | 0.615774 | 5.84E-20 | 1.70E-17 |
| RHOD    | 0.626097 | 9.16E-21 | 3.35E-18 |
| RHOF    | 0.55655  | 7.25E-16 | 6.95E-14 |
| RHOG    | 0.374448 | 2.62E-07 | 2.71E-06 |
| RHOH    | -0.12593 | 0.093936 | 0.161957 |
| RHOJ    | -0.16976 | 0.023485 | 0.050892 |
| RHOQ    | -0.14977 | 0.046    | 0.089607 |
| RHOT1   | -0.23121 | 0.001902 | 0.005973 |
| RHOT2   | 0.210497 | 0.004798 | 0.013226 |
| RHOU    | -0.1272  | 0.090642 | 0.157252 |
| RHOV    | 0.457863 | 1.31E-10 | 3.57E-09 |
| RHOXF1  | -0.08425 | 0.263518 | 0.370717 |
| RHOXF2B | -0.16947 | 0.023729 | 0.051342 |
| RHO     | 0.230474 | 0.001968 | 0.006151 |
| RHPN1   | 0.199903 | 0.007466 | 0.019261 |
| RHPN2   | 0.446996 | 3.98E-10 | 9.54E-09 |
| RIBC1   | -0.20844 | 0.005238 | 0.014245 |
| RIBC2   | -0.14982 | 0.045926 | 0.089515 |
| RIC3    | -0.26072 | 0.00044  | 0.001704 |
| RIC8A   | 0.029902 | 0.691943 | 0.774351 |
| RIC8B   | -0.47915 | 1.32E-11 | 4.55E-10 |
| RICH2   | -0.10132 | 0.178408 | 0.27133  |
| RICTOR  | -0.221   | 0.003032 | 0.008922 |

|         |          |          |          |
|---------|----------|----------|----------|
| RIF1    | -0.11376 | 0.130554 | 0.211189 |
| RILPL1  | -0.048   | 0.524574 | 0.629922 |
| RILPL2  | 0.095758 | 0.203554 | 0.302273 |
| RILP    | 0.320235 | 1.31E-05 | 8.23E-05 |
| RIMBP2  | -0.33838 | 3.84E-06 | 2.82E-05 |
| RIMBP3C | -0.31242 | 2.18E-05 | 0.000127 |
| RIMBP3  | -0.3134  | 2.05E-05 | 0.000121 |
| RIMKLA  | -0.14624 | 0.051432 | 0.09831  |
| RIMKLB  | 0.172331 | 0.021435 | 0.047033 |
| RIMS1   | -0.27534 | 0.000199 | 0.000864 |
| RIMS2   | -0.36712 | 4.64E-07 | 4.46E-06 |
| RIMS3   | -0.05179 | 0.492378 | 0.600959 |
| RIMS4   | -0.04551 | 0.546361 | 0.649056 |
| RIN1    | 0.386395 | 9.97E-08 | 1.16E-06 |
| RIN2    | -0.18769 | 0.012114 | 0.029106 |
| RIN3    | 0.203999 | 0.006309 | 0.016686 |
| RING1   | 0.075394 | 0.317206 | 0.428737 |
| RINL    | 0.083421 | 0.268264 | 0.37585  |
| RINT1   | -0.32375 | 1.04E-05 | 6.74E-05 |
| RIOK1   | -0.3171  | 1.61E-05 | 9.83E-05 |
| RIOK2   | -0.31361 | 2.02E-05 | 0.000119 |
| RIOK3   | 0.358741 | 8.78E-07 | 7.75E-06 |
| RIPK1   | -0.12731 | 0.090357 | 0.156895 |
| RIPK2   | 0.313899 | 1.98E-05 | 0.000118 |
| RIPK3   | 0.492717 | 2.82E-12 | 1.17E-10 |
| RIPK4   | 0.379256 | 1.78E-07 | 1.94E-06 |
| RIPPLY1 | 0.044197 | 0.55801  | 0.659161 |
| RIPPLY2 | -0.3295  | 7.08E-06 | 4.80E-05 |
| RIT1    | 0.210498 | 0.004798 | 0.013226 |
| RIT2    | -0.06563 | 0.384068 | 0.496929 |
| RLBP1   | -0.06427 | 0.394052 | 0.506795 |
| RLF     | -0.07067 | 0.348532 | 0.460994 |
| RLIM    | -0.17982 | 0.016312 | 0.037428 |
| RLN1    | -0.35788 | 9.37E-07 | 8.19E-06 |
| RLN2    | -0.2886  | 9.35E-05 | 0.000448 |
| RLN3    | -0.17821 | 0.017315 | 0.039311 |
| RLTPR   | -0.21492 | 0.003965 | 0.011242 |
| RMI1    | -0.37431 | 2.65E-07 | 2.73E-06 |
| RMND1   | 0.035396 | 0.639028 | 0.730202 |
| RMND5A  | 0.101926 | 0.175795 | 0.268161 |
| RMND5B  | -0.04815 | 0.523355 | 0.62886  |
| RMRP    | -0.00467 | 0.950637 | 0.966672 |
| RMST    | -0.12216 | 0.104285 | 0.176734 |
| RNASE10 | 0.155759 | 0.037882 | 0.076142 |
| RNASE11 | -0.00684 | 0.927812 | 0.950106 |
| RNASE13 | 0.178027 | 0.017432 | 0.039525 |
| RNASE1  | 0.098419 | 0.191215 | 0.287011 |
| RNASE2  | 0.227094 | 0.002301 | 0.007039 |
| RNASE3  | 0.1975   | 0.00823  | 0.020925 |
| RNASE4  | -0.00937 | 0.901178 | 0.931029 |
| RNASE6  | -0.03066 | 0.684582 | 0.768986 |
| RNASE7  | 0.171072 | 0.022421 | 0.048865 |
| RNASE8  | 0.011854 | 0.87521  | 0.91346  |
| RNASE9  | 0.132076 | 0.078849 | 0.14044  |

|          |          |          |          |
|----------|----------|----------|----------|
| RNASEH1  | 0.172504 | 0.021303 | 0.04681  |
| RNASEH2A | 0.348022 | 1.93E-06 | 1.54E-05 |
| RNASEH2B | -0.03062 | 0.68493  | 0.769246 |
| RNASEH2C | 0.071935 | 0.33998  | 0.452255 |
| RNASEK   | -0.19243 | 0.010073 | 0.024853 |
| RNASEL   | 0.290898 | 8.17E-05 | 0.000399 |
| RNASEN   | -0.31188 | 2.26E-05 | 0.000131 |
| RNASET2  | 0.320911 | 1.26E-05 | 7.93E-05 |
| RND1     | 0.126565 | 0.092285 | 0.159696 |
| RND2     | -0.41427 | 9.01E-09 | 1.45E-07 |
| RND3     | 0.249367 | 0.000789 | 0.002813 |
| RNF103   | 0.263714 | 0.000375 | 0.001488 |
| RNF10    | -0.11589 | 0.123453 | 0.201783 |
| RNF111   | -0.12822 | 0.088067 | 0.153742 |
| RNF112   | 0.125898 | 0.094026 | 0.162085 |
| RNF113A  | 0.099709 | 0.185431 | 0.279838 |
| RNF113B  | 0.145494 | 0.052651 | 0.100242 |
| RNF114   | -0.08717 | 0.24727  | 0.352397 |
| RNF115   | -0.24514 | 0.000974 | 0.003356 |
| RNF11    | -0.18501 | 0.013426 | 0.031741 |
| RNF121   | 0.194866 | 0.009146 | 0.022855 |
| RNF122   | 0.02898  | 0.700983 | 0.781664 |
| RNF123   | -0.11826 | 0.115916 | 0.192147 |
| RNF125   | -0.26152 | 0.000422 | 0.001642 |
| RNF126P1 | 0.07899  | 0.294608 | 0.404527 |
| RNF126   | 0.315607 | 1.78E-05 | 0.000107 |
| RNF128   | 0.309572 | 2.61E-05 | 0.000149 |
| RNF130   | -0.21097 | 0.004702 | 0.01299  |
| RNF133   | -0.08241 | 0.274114 | 0.382225 |
| RNF135   | 0.415132 | 8.33E-09 | 1.35E-07 |
| RNF138P1 | -0.27831 | 0.000169 | 0.000748 |
| RNF138   | -0.39704 | 4.09E-08 | 5.32E-07 |
| RNF139   | 0.045712 | 0.544583 | 0.647423 |
| RNF13    | -0.02656 | 0.724904 | 0.800662 |
| RNF141   | 0.019566 | 0.795459 | 0.855603 |
| RNF144A  | -0.03465 | 0.646067 | 0.736152 |
| RNF144B  | -0.04336 | 0.565518 | 0.666104 |
| RNF145   | -0.03672 | 0.626494 | 0.719956 |
| RNF146   | -0.36754 | 4.49E-07 | 4.33E-06 |
| RNF148   | -0.09209 | 0.221486 | 0.323462 |
| RNF149   | 0.573996 | 5.49E-17 | 7.49E-15 |
| RNF14    | -0.27992 | 0.000154 | 0.000693 |
| RNF150   | -0.38139 | 1.50E-07 | 1.67E-06 |
| RNF151   | -0.03647 | 0.628875 | 0.721644 |
| RNF152   | -0.0442  | 0.558023 | 0.659161 |
| RNF157   | -0.25765 | 0.000516 | 0.001954 |
| RNF160   | -0.1535  | 0.040791 | 0.081024 |
| RNF165   | -0.08554 | 0.256273 | 0.362641 |
| RNF166   | -0.08346 | 0.26805  | 0.37565  |
| RNF167   | -0.32904 | 7.31E-06 | 4.94E-05 |
| RNF168   | -0.06217 | 0.409714 | 0.52178  |
| RNF169   | -0.05525 | 0.463894 | 0.574087 |
| RNF170   | 0.173487 | 0.020564 | 0.04547  |
| RNF175   | -0.02968 | 0.694125 | 0.775941 |



|         |          |          |          |
|---------|----------|----------|----------|
| RNF17   | 0.01583  | 0.833881 | 0.882292 |
| RNF180  | -0.34327 | 2.72E-06 | 2.09E-05 |
| RNF181  | 0.38926  | 7.87E-08 | 9.48E-07 |
| RNF182  | -0.39634 | 4.34E-08 | 5.62E-07 |
| RNF183  | 0.344472 | 2.50E-06 | 1.93E-05 |
| RNF185  | -0.21019 | 0.004862 | 0.013381 |
| RNF186  | -0.11712 | 0.1195   | 0.196777 |
| RNF187  | 0.16852  | 0.024538 | 0.05281  |
| RNF19A  | -0.04248 | 0.57345  | 0.6731   |
| RNF19B  | 0.142137 | 0.05841  | 0.109148 |
| RNF207  | 0.436923 | 1.08E-09 | 2.25E-08 |
| RNF208  | 0.136624 | 0.068989 | 0.125697 |
| RNF20   | -0.42109 | 4.83E-09 | 8.41E-08 |
| RNF212  | -0.21145 | 0.004606 | 0.012763 |
| RNF213  | 0.164455 | 0.028264 | 0.059538 |
| RNF214  | 0.002488 | 0.973705 | 0.982171 |
| RNF215  | 0.266784 | 0.000319 | 0.001293 |
| RNF216L | -0.24925 | 0.000793 | 0.002828 |
| RNF216  | -0.45766 | 1.34E-10 | 3.64E-09 |
| RNF217  | -0.00551 | 0.941859 | 0.960908 |
| RNF219  | 0.073432 | 0.329999 | 0.442131 |
| RNF220  | -0.13924 | 0.063792 | 0.117582 |
| RNF222  | -0.0855  | 0.256461 | 0.362841 |
| RNF24   | 0.130825 | 0.081752 | 0.144827 |
| RNF25   | 0.249637 | 0.000778 | 0.002779 |
| RNF26   | 0.134866 | 0.072676 | 0.131229 |
| RNF2    | 0.14689  | 0.050397 | 0.09662  |
| RNF31   | -0.02039 | 0.78707  | 0.849134 |
| RNF32   | -0.00838 | 0.911626 | 0.93805  |
| RNF34   | -0.24956 | 0.000781 | 0.00279  |
| RNF38   | -0.27871 | 0.000165 | 0.000734 |
| RNF39   | 0.512217 | 2.71E-13 | 1.45E-11 |
| RNF40   | 0.121769 | 0.105407 | 0.178299 |
| RNF41   | -0.36592 | 5.09E-07 | 4.83E-06 |
| RNF43   | 0.166191 | 0.026617 | 0.056612 |
| RNF44   | 0.042334 | 0.574746 | 0.674264 |
| RNF4    | -0.2993  | 4.94E-05 | 0.00026  |
| RNF5P1  | 0.037288 | 0.621203 | 0.715331 |
| RNF5    | 0.304535 | 3.58E-05 | 0.000196 |
| RNF6    | -0.15522 | 0.038563 | 0.077283 |
| RNF7    | 0.464436 | 6.57E-11 | 1.95E-09 |
| RNF8    | 0.022935 | 0.761226 | 0.829636 |
| RNFT1   | -0.19219 | 0.010169 | 0.025051 |
| RNFT2   | -0.16183 | 0.030919 | 0.064256 |
| RNGTT   | -0.31418 | 1.95E-05 | 0.000116 |
| RNH1    | 0.273432 | 0.000222 | 0.000944 |
| RNLS    | -0.04695 | 0.533709 | 0.637639 |
| RNMTL1  | -0.26203 | 0.00041  | 0.001606 |
| RNMT    | -0.18241 | 0.014811 | 0.034481 |
| RNPC3   | 0.05597  | 0.458058 | 0.568839 |
| RNPEPL1 | 0.465766 | 5.70E-11 | 1.73E-09 |
| RNPEP   | 0.4157   | 7.91E-09 | 1.29E-07 |
| RNPS1   | 0.157477 | 0.035789 | 0.072643 |
| RNU11   | 0.012949 | 0.863795 | 0.905657 |

|           |          |          |          |
|-----------|----------|----------|----------|
| RNU4ATAC  | -0.10319 | 0.170455 | 0.261914 |
| RNU6ATAC  | -0.02726 | 0.717941 | 0.795014 |
| ROBLD3    | 0.326682 | 8.57E-06 | 5.66E-05 |
| ROB01     | -0.05134 | 0.49617  | 0.603696 |
| ROB02     | -0.04558 | 0.545785 | 0.648483 |
| ROB03     | 0.336971 | 4.24E-06 | 3.07E-05 |
| ROB04     | -0.24459 | 0.001001 | 0.003436 |
| ROCK1     | -0.07524 | 0.318217 | 0.429923 |
| ROCK2     | -0.14244 | 0.057877 | 0.108347 |
| ROD1      | 0.231027 | 0.001918 | 0.006016 |
| ROGDI     | -0.06019 | 0.424788 | 0.537052 |
| ROM1      | -0.00328 | 0.96538  | 0.976641 |
| ROM01     | 0.161449 | 0.031321 | 0.064921 |
| ROPN1B    | 0.180806 | 0.015727 | 0.036257 |
| ROPN1L    | -0.32743 | 8.14E-06 | 5.42E-05 |
| ROPN1     | 0.097656 | 0.194696 | 0.291328 |
| ROR1      | -0.10418 | 0.166381 | 0.256852 |
| ROR2      | 0.016662 | 0.825285 | 0.8764   |
| RORA      | -0.20206 | 0.006836 | 0.017886 |
| RORB      | -0.17421 | 0.020037 | 0.044469 |
| RORC      | 0.033584 | 0.656291 | 0.745149 |
| ROS1      | 0.139094 | 0.064072 | 0.117999 |
| RP1-177G6 | -0.11452 | 0.127973 | 0.207797 |
| RP1L1     | 0.395334 | 4.72E-08 | 6.07E-07 |
| RP1       | 0.417896 | 6.48E-09 | 1.09E-07 |
| RP2       | -0.0497  | 0.510039 | 0.616616 |
| RP9P      | 0.036141 | 0.631982 | 0.724076 |
| RP9       | -0.01206 | 0.873079 | 0.912295 |
| RPA1      | -0.43122 | 1.87E-09 | 3.64E-08 |
| RPA2      | -0.19042 | 0.010898 | 0.026596 |
| RPA3      | 0.144231 | 0.054759 | 0.103597 |
| RPA4      | 0.060316 | 0.423843 | 0.536149 |
| RPAIN     | -0.21848 | 0.003392 | 0.009801 |
| RPAP1     | -0.04581 | 0.54369  | 0.646633 |
| RPAP2     | -0.06269 | 0.405823 | 0.51826  |
| RPAP3     | -0.18148 | 0.015337 | 0.035501 |
| RPE65     | -0.10093 | 0.180071 | 0.27344  |
| RPE       | 0.296262 | 5.94E-05 | 0.000303 |
| RPF1      | 0.065645 | 0.383985 | 0.496854 |
| RPF2      | 0.003023 | 0.968054 | 0.978195 |
| RPGRIP1L  | -0.22505 | 0.002526 | 0.007628 |
| RPGRIP1   | -0.03093 | 0.681901 | 0.766567 |
| RPGR      | -0.45713 | 1.42E-10 | 3.81E-09 |
| RPH3AL    | -0.33651 | 4.38E-06 | 3.17E-05 |
| RPH3A     | -0.12784 | 0.089024 | 0.155057 |
| RPIA      | 0.22863  | 0.002144 | 0.006628 |
| RPL10A    | 0.035683 | 0.636307 | 0.727891 |
| RPL10L    | -0.19228 | 0.010133 | 0.024977 |
| RPL10     | 0.059966 | 0.426542 | 0.538701 |
| RPL11     | 0.039933 | 0.596647 | 0.693842 |
| RPL12     | 0.101571 | 0.177316 | 0.269982 |
| RPL13AP17 | 0.146408 | 0.051166 | 0.097887 |
| RPL13AP20 | 0.190916 | 0.010689 | 0.026155 |
| RPL13AP3  | 0.002396 | 0.974677 | 0.982678 |

|           |          |          |          |
|-----------|----------|----------|----------|
| RPL13AP6  | -0.09512 | 0.206613 | 0.305897 |
| RPL13A    | -0.01045 | 0.889859 | 0.923472 |
| RPL13P5   | 0.017421 | 0.817467 | 0.870765 |
| RPL13     | 0.154321 | 0.039712 | 0.079239 |
| RPL14     | 0.183563 | 0.014181 | 0.033228 |
| RPL15     | -0.12787 | 0.088951 | 0.154957 |
| RPL17     | -0.26949 | 0.000275 | 0.001139 |
| RPL18A    | 0.099943 | 0.184399 | 0.278599 |
| RPL18     | 0.1083   | 0.150161 | 0.236464 |
| RPL19P12  | -0.07836 | 0.298463 | 0.408458 |
| RPL19     | 0.116289 | 0.122151 | 0.200051 |
| RPL21P44  | -0.09511 | 0.206651 | 0.305908 |
| RPL21     | 0.042663 | 0.571776 | 0.671595 |
| RPL22L1   | 0.2055   | 0.005926 | 0.015815 |
| RPL22     | -0.02085 | 0.782338 | 0.845433 |
| RPL23AP32 | -0.05398 | 0.474197 | 0.583931 |
| RPL23AP52 | -0.27281 | 0.000229 | 0.000973 |
| RPL23AP64 | 0.00386  | 0.959213 | 0.972162 |
| RPL23AP7  | 0.178982 | 0.016829 | 0.038382 |
| RPL23AP82 | 0.008194 | 0.913558 | 0.939597 |
| RPL23A    | 0.112012 | 0.136596 | 0.219202 |
| RPL23P8   | 0.138221 | 0.065775 | 0.120743 |
| RPL23     | 0.12172  | 0.105549 | 0.178463 |
| RPL24     | 0.119169 | 0.113112 | 0.188566 |
| RPL26L1   | 0.148341 | 0.048142 | 0.093046 |
| RPL26     | -0.15579 | 0.037839 | 0.07607  |
| RPL27A    | 0.192335 | 0.01011  | 0.024927 |
| RPL27     | 0.141043 | 0.060397 | 0.112182 |
| RPL28     | 0.250402 | 0.000749 | 0.002687 |
| RPL29P2   | -0.00643 | 0.932138 | 0.953302 |
| RPL29     | 0.182931 | 0.014522 | 0.033912 |
| RPL30     | 0.097432 | 0.195723 | 0.292534 |
| RPL31P11  | -0.08718 | 0.247221 | 0.352353 |
| RPL31     | 0.110178 | 0.143178 | 0.227552 |
| RPL32P3   | 0.172237 | 0.021508 | 0.047161 |
| RPL32     | 0.111315 | 0.13907  | 0.22231  |
| RPL34     | 0.085443 | 0.256798 | 0.363201 |
| RPL35A    | 0.088784 | 0.238595 | 0.342727 |
| RPL35     | 0.11713  | 0.119455 | 0.196761 |
| RPL36AL   | 0.111129 | 0.139737 | 0.223177 |
| RPL36A    | 0.212774 | 0.004352 | 0.012145 |
| RPL36     | 0.172696 | 0.021158 | 0.046548 |
| RPL37A    | 0.085263 | 0.257806 | 0.364158 |
| RPL37     | 0.141562 | 0.059448 | 0.110742 |
| RPL38     | 0.034978 | 0.642995 | 0.733674 |
| RPL39L    | 0.345603 | 2.30E-06 | 1.80E-05 |
| RPL39     | 0.147309 | 0.049736 | 0.095549 |
| RPL3L     | -0.17044 | 0.022926 | 0.049815 |
| RPL3      | -0.25113 | 0.000722 | 0.0026   |
| RPL41     | -0.00173 | 0.981729 | 0.987371 |
| RPL4      | -0.05547 | 0.462049 | 0.572287 |
| RPL5      | -0.15054 | 0.044886 | 0.08787  |
| RPL6      | -0.25451 | 0.000607 | 0.002241 |
| RPL7A     | -0.10312 | 0.170779 | 0.262269 |

|           |          |          |          |
|-----------|----------|----------|----------|
| RPL7L1    | -0.35534 | 1.13E-06 | 9.66E-06 |
| RPL7      | -0.15645 | 0.037031 | 0.074728 |
| RPL8      | 0.169441 | 0.023754 | 0.051392 |
| RPL9      | 0.019463 | 0.796515 | 0.856452 |
| RPLP0P2   | 0.147791 | 0.048987 | 0.094357 |
| RPLP0     | -0.00266 | 0.971911 | 0.98109  |
| RPLP1     | 0.201441 | 0.007011 | 0.018273 |
| RPLP2     | 0.158861 | 0.034175 | 0.069884 |
| RPN1      | 0.198972 | 0.007754 | 0.019885 |
| RPN2      | -0.13231 | 0.078321 | 0.139725 |
| RPP14     | -0.29427 | 6.69E-05 | 0.000336 |
| RPP21     | 0.163261 | 0.029446 | 0.061674 |
| RPP25     | 0.378776 | 1.85E-07 | 2.01E-06 |
| RPP30     | 0.108719 | 0.14858  | 0.234479 |
| RPP38     | 0.238534 | 0.001344 | 0.004428 |
| RPP40     | 0.036682 | 0.62689  | 0.720077 |
| RPPH1     | -0.01518 | 0.840601 | 0.887361 |
| RPRD1A    | -0.40173 | 2.73E-08 | 3.75E-07 |
| RPRD1B    | -0.2468  | 0.000897 | 0.003131 |
| RPRD2     | -0.26312 | 0.000387 | 0.001528 |
| RPRML     | -0.39726 | 4.01E-08 | 5.23E-07 |
| RPRM      | -0.19707 | 0.008374 | 0.021241 |
| RPS10P7   | -0.21647 | 0.003705 | 0.010589 |
| RPS10     | 0.003615 | 0.961802 | 0.974009 |
| RPS11     | 0.098786 | 0.189556 | 0.284997 |
| RPS12     | -0.0399  | 0.596918 | 0.693953 |
| RPS13     | 0.103298 | 0.170021 | 0.261451 |
| RPS14     | 0.072293 | 0.337576 | 0.449904 |
| RPS15AP1C | 0.142459 | 0.057836 | 0.10829  |
| RPS15A    | 0.10643  | 0.157373 | 0.24565  |
| RPS15     | 0.095269 | 0.205882 | 0.305112 |
| RPS16     | 0.161771 | 0.030981 | 0.064344 |
| RPS17     | 0.047291 | 0.53076  | 0.635036 |
| RPS18     | 0.146808 | 0.050527 | 0.096824 |
| RPS19BP1  | 0.101641 | 0.177012 | 0.269602 |
| RPS19     | 0.201725 | 0.00693  | 0.018094 |
| RPS20     | 0.11648  | 0.121535 | 0.199223 |
| RPS21     | 0.111655 | 0.13786  | 0.220791 |
| RPS23     | -0.02929 | 0.697889 | 0.77916  |
| RPS24     | 0.159275 | 0.033704 | 0.069085 |
| RPS25     | 0.128087 | 0.088403 | 0.154151 |
| RPS26P11  | 0.005079 | 0.946354 | 0.963933 |
| RPS26     | -0.02525 | 0.737993 | 0.810862 |
| RPS27A    | 0.152945 | 0.041532 | 0.082272 |
| RPS27L    | 0.244569 | 0.001002 | 0.003439 |
| RPS27     | -0.06548 | 0.385148 | 0.49787  |
| RPS28     | -0.01746 | 0.817113 | 0.870626 |
| RPS29     | 0.082031 | 0.27635  | 0.38426  |
| RPS2P32   | 0.106558 | 0.156868 | 0.245113 |
| RPS2      | 0.178417 | 0.017184 | 0.039058 |
| RPS3A     | -0.18513 | 0.013362 | 0.031606 |
| RPS3      | 0.164458 | 0.028261 | 0.059538 |
| RPS4X     | -0.05725 | 0.447796 | 0.55901  |
| RPS4Y1    | -0.02611 | 0.729377 | 0.803986 |

|         |          |          |          |
|---------|----------|----------|----------|
| RPS4Y2  | 0.004571 | 0.951712 | 0.967243 |
| RPS5    | 0.001946 | 0.979437 | 0.985789 |
| RPS6KA1 | 0.461832 | 8.65E-11 | 2.47E-09 |
| RPS6KA2 | -0.21216 | 0.004469 | 0.012424 |
| RPS6KA3 | -0.21404 | 0.004119 | 0.011612 |
| RPS6KA4 | 0.602032 | 6.20E-19 | 1.41E-16 |
| RPS6KA5 | -0.30217 | 4.14E-05 | 0.000223 |
| RPS6KA6 | -0.32304 | 1.09E-05 | 7.02E-05 |
| RPS6KB1 | -0.15216 | 0.042596 | 0.084069 |
| RPS6KB2 | 0.153879 | 0.040289 | 0.080209 |
| RPS6KC1 | -0.18645 | 0.012706 | 0.030295 |
| RPS6KL1 | 0.006477 | 0.931622 | 0.952873 |
| RPS6    | -0.05591 | 0.45854  | 0.56911  |
| RPS7    | 0.036108 | 0.632295 | 0.724308 |
| RPS8    | 0.073815 | 0.327477 | 0.439347 |
| RPS9    | 0.025333 | 0.737128 | 0.810091 |
| RPSAP52 | 0.382133 | 1.41E-07 | 1.58E-06 |
| RPSAP58 | 0.072737 | 0.334605 | 0.446818 |
| RPSAP9  | -0.08208 | 0.276065 | 0.383971 |
| RPSA    | 0.07728  | 0.305214 | 0.415493 |
| RPTN    | 0.275739 | 0.000195 | 0.000847 |
| RPTOR   | -0.29755 | 5.49E-05 | 0.000284 |
| RPUSD1  | 0.147471 | 0.049483 | 0.095183 |
| RPUSD2  | 0.01666  | 0.825311 | 0.8764   |
| RPUSD3  | 0.087943 | 0.243086 | 0.347713 |
| RPUSD4  | 0.2207   | 0.003073 | 0.009017 |
| RQCD1   | -0.14303 | 0.056837 | 0.10676  |
| RRAD    | 0.411036 | 1.20E-08 | 1.85E-07 |
| RRAGA   | -0.28686 | 0.000104 | 0.00049  |
| RRAGB   | -0.10484 | 0.163706 | 0.253564 |
| RRAGC   | -0.08434 | 0.26302  | 0.37007  |
| RRAGD   | -0.13257 | 0.077722 | 0.13877  |
| RRAS2   | 0.274237 | 0.000212 | 0.000908 |
| RRAS    | 0.681156 | 1.29E-25 | 1.70E-22 |
| RRBP1   | -0.01421 | 0.850631 | 0.895463 |
| RREB1   | -0.00964 | 0.898358 | 0.929165 |
| RRH     | -0.06652 | 0.377633 | 0.490303 |
| RRM1    | 0.025767 | 0.732795 | 0.806764 |
| RRM2B   | -0.35255 | 1.39E-06 | 1.15E-05 |
| RRM2    | 0.395217 | 4.77E-08 | 6.13E-07 |
| RRN3P1  | 0.264215 | 0.000366 | 0.001454 |
| RRN3P2  | 0.12394  | 0.099295 | 0.169555 |
| RRN3P3  | 0.317691 | 1.55E-05 | 9.52E-05 |
| RRN3    | -0.05568 | 0.460388 | 0.570765 |
| RRP12   | -0.00761 | 0.919697 | 0.944279 |
| RRP15   | 0.045146 | 0.549584 | 0.651958 |
| RRP1B   | -0.09567 | 0.203991 | 0.302832 |
| RRP1    | 0.256272 | 0.000555 | 0.002076 |
| RRP7A   | 0.135628 | 0.071057 | 0.128872 |
| RRP7B   | 0.143748 | 0.055585 | 0.104879 |
| RRP8    | 0.167829 | 0.025139 | 0.053875 |
| RRP9    | 0.36688  | 4.73E-07 | 4.53E-06 |
| RRS1    | 0.15272  | 0.041837 | 0.082769 |
| RS1     | -0.17607 | 0.018728 | 0.041996 |

|          |          |          |          |
|----------|----------|----------|----------|
| RSAD1    | -0.18424 | 0.013822 | 0.032503 |
| RSAD2    | 0.301778 | 4.25E-05 | 0.000228 |
| RSBN1L   | -0.25421 | 0.000617 | 0.002267 |
| RSBN1    | -0.39244 | 6.03E-08 | 7.48E-07 |
| RSC1A1   | -0.1542  | 0.039873 | 0.079457 |
| RSF1     | -0.0359  | 0.634278 | 0.72599  |
| RSL1D1   | 0.06655  | 0.377444 | 0.490122 |
| RSL24D1  | 0.006289 | 0.933599 | 0.954352 |
| RSPH10B2 | -0.27145 | 0.000247 | 0.001038 |
| RSPH1    | -0.02573 | 0.733168 | 0.807077 |
| RSPH3    | 0.004305 | 0.954519 | 0.968782 |
| RSPH4A   | -0.34824 | 1.90E-06 | 1.52E-05 |
| RSPH6A   | -0.05783 | 0.443259 | 0.554993 |
| RSPH9    | -0.26888 | 0.000284 | 0.001173 |
| RSP01    | -0.19731 | 0.008293 | 0.021055 |
| RSP02    | 0.004402 | 0.953494 | 0.968331 |
| RSP03    | -0.14241 | 0.05792  | 0.108406 |
| RSP04    | -0.24894 | 0.000806 | 0.002863 |
| RSPRY1   | -0.13867 | 0.064888 | 0.119302 |
| RSRC1    | -0.13258 | 0.077707 | 0.138756 |
| RSRC2    | -0.06372 | 0.398092 | 0.510828 |
| RSU1     | 0.182432 | 0.014798 | 0.034454 |
| RTBDN    | -0.14663 | 0.050804 | 0.097307 |
| RTCD1    | 0.093532 | 0.214308 | 0.315096 |
| RTDR1    | -0.20534 | 0.005965 | 0.015903 |
| RTEL1    | 0.136958 | 0.068306 | 0.124637 |
| RTF1     | 0.08351  | 0.267756 | 0.375291 |
| RTKN2    | 0.428164 | 2.49E-09 | 4.70E-08 |
| RTKN     | 0.338789 | 3.73E-06 | 2.75E-05 |
| RTL1     | -0.06709 | 0.373584 | 0.486643 |
| RTN1     | -0.31081 | 2.42E-05 | 0.000139 |
| RTN2     | 0.226395 | 0.002376 | 0.00723  |
| RTN3     | 0.170864 | 0.022587 | 0.04919  |
| RTN4IP1  | -0.12323 | 0.101264 | 0.172427 |
| RTN4RL1  | -0.22212 | 0.002883 | 0.008548 |
| RTN4RL2  | -0.17828 | 0.017271 | 0.039223 |
| RTN4R    | 0.423353 | 3.92E-09 | 7.03E-08 |
| RTN4     | 0.166277 | 0.026538 | 0.056468 |
| RTP1     | 0.077349 | 0.304779 | 0.415263 |
| RTP2     | 0.282489 | 0.000133 | 0.000611 |
| RTP3     | -0.01562 | 0.836016 | 0.884079 |
| RTP4     | 0.522655 | 7.25E-14 | 4.39E-12 |
| RTTN     | -0.29596 | 6.04E-05 | 0.000308 |
| RUFY1    | 0.278683 | 0.000165 | 0.000735 |
| RUFY2    | -0.08245 | 0.273898 | 0.38195  |
| RUFY3    | -0.31268 | 2.14E-05 | 0.000126 |
| RUFY4    | 0.293652 | 6.94E-05 | 0.000346 |
| RUNDC1   | -0.08909 | 0.23696  | 0.340863 |
| RUNDC2A  | -0.23552 | 0.001552 | 0.005017 |
| RUNDC2C  | 0.097437 | 0.195701 | 0.292534 |
| RUNDC3A  | -0.25634 | 0.000553 | 0.00207  |
| RUNDC3B  | -0.35403 | 1.25E-06 | 1.05E-05 |
| RUNX1T1  | -0.17966 | 0.016413 | 0.037607 |
| RUNX1    | 0.387601 | 9.03E-08 | 1.07E-06 |

|         |          |          |          |
|---------|----------|----------|----------|
| RUNX2   | 0.216653 | 0.003676 | 0.010517 |
| RUNX3   | 0.010013 | 0.894465 | 0.926369 |
| RUSC1   | 0.279313 | 0.00016  | 0.000714 |
| RUSC2   | 0.062155 | 0.409826 | 0.521855 |
| RUVBL1  | 0.238068 | 0.001374 | 0.004517 |
| RUVBL2  | 0.20622  | 0.00575  | 0.015424 |
| RWDD1   | -0.13216 | 0.078654 | 0.14018  |
| RWDD2A  | -0.41422 | 9.05E-09 | 1.45E-07 |
| RWDD2B  | 0.146001 | 0.051823 | 0.09894  |
| RWDD3   | 0.012217 | 0.871424 | 0.911239 |
| RWDD4A  | -0.16682 | 0.02604  | 0.055545 |
| RXFP1   | -0.31904 | 1.42E-05 | 8.81E-05 |
| RXFP2   | 0.072224 | 0.338036 | 0.450279 |
| RXFP3   | -0.2999  | 4.76E-05 | 0.000252 |
| RXFP4   | 0.256966 | 0.000535 | 0.002016 |
| RXRA    | -0.31114 | 2.37E-05 | 0.000137 |
| RXRB    | -0.17536 | 0.019215 | 0.042928 |
| RXRG    | -0.10784 | 0.15193  | 0.238794 |
| RYBP    | -0.22836 | 0.00217  | 0.006697 |
| RYK     | 0.292125 | 7.60E-05 | 0.000374 |
| RYR1    | 0.120261 | 0.109823 | 0.184288 |
| RYR2    | -0.25131 | 0.000715 | 0.002581 |
| RYR3    | -0.25373 | 0.000632 | 0.002316 |
| S100A10 | 0.647491 | 1.57E-22 | 1.03E-19 |
| S100A11 | 0.654756 | 3.66E-23 | 2.78E-20 |
| S100A12 | -0.27235 | 0.000235 | 0.000996 |
| S100A13 | 0.427482 | 2.66E-09 | 4.97E-08 |
| S100A14 | 0.551343 | 1.52E-15 | 1.33E-13 |
| S100A16 | 0.613284 | 9.04E-20 | 2.48E-17 |
| S100A1  | -0.06871 | 0.362118 | 0.47534  |
| S100A2  | 0.554346 | 9.94E-16 | 9.23E-14 |
| S100A3  | 0.395465 | 4.67E-08 | 6.01E-07 |
| S100A4  | 0.420013 | 5.33E-09 | 9.14E-08 |
| S100A5  | 0.495323 | 2.08E-12 | 8.99E-11 |
| S100A6  | 0.661065 | 9.99E-24 | 8.26E-21 |
| S100A7A | -0.07184 | 0.340597 | 0.452892 |
| S100A7  | -0.02083 | 0.782573 | 0.845606 |
| S100A8  | 0.003721 | 0.960682 | 0.973083 |
| S100A9  | 0.101653 | 0.176963 | 0.269547 |
| S100B   | -0.08382 | 0.265973 | 0.373454 |
| S100G   | 0.020522 | 0.785706 | 0.848204 |
| S100PBP | -0.10051 | 0.181912 | 0.27562  |
| S100P   | 0.589298 | 5.01E-18 | 9.01E-16 |
| S100Z   | -0.20473 | 0.006121 | 0.016256 |
| S1PR1   | -0.25032 | 0.000752 | 0.002696 |
| S1PR2   | -0.04547 | 0.546756 | 0.649372 |
| S1PR3   | 0.088508 | 0.240062 | 0.344359 |
| S1PR4   | 0.118071 | 0.116493 | 0.192828 |
| S1PR5   | 0.048105 | 0.523706 | 0.629213 |
| SAA1    | 0.042328 | 0.574798 | 0.674264 |
| SAA2    | 0.072403 | 0.33684  | 0.449135 |
| SAA3P   | -0.05089 | 0.499961 | 0.607162 |
| SAA4    | 0.086328 | 0.251884 | 0.357761 |
| SAAL1   | 0.155239 | 0.038536 | 0.077236 |

|         |          |          |          |
|---------|----------|----------|----------|
| SAC3D1  | 0.185062 | 0.013397 | 0.031681 |
| SACM1L  | -0.3659  | 5.10E-07 | 4.84E-06 |
| SACS    | -0.12814 | 0.088258 | 0.153981 |
| SAE1    | 0.25158  | 0.000705 | 0.002549 |
| SAFB2   | -0.22132 | 0.002989 | 0.008823 |
| SAFB    | -0.1345  | 0.073454 | 0.132368 |
| SAGE1   | -0.00097 | 0.989766 | 0.992542 |
| SAG     | 0.035812 | 0.63509  | 0.726728 |
| SALL1   | -0.04658 | 0.536975 | 0.64038  |
| SALL2   | -0.39437 | 5.13E-08 | 6.51E-07 |
| SALL3   | -0.28288 | 0.00013  | 0.000599 |
| SALL4   | -0.04319 | 0.567072 | 0.6671   |
| SAMD10  | 0.431053 | 1.90E-09 | 3.68E-08 |
| SAMD11  | -0.0517  | 0.493148 | 0.601536 |
| SAMD12  | 0.380011 | 1.68E-07 | 1.84E-06 |
| SAMD13  | 0.257205 | 0.000529 | 0.001992 |
| SAMD14  | 0.268388 | 0.000292 | 0.001201 |
| SAMD1   | 0.118024 | 0.11664  | 0.19298  |
| SAMD3   | -0.11825 | 0.115937 | 0.192151 |
| SAMD4A  | -0.01524 | 0.839971 | 0.886938 |
| SAMD4B  | -0.03001 | 0.690914 | 0.77368  |
| SAMD5   | -0.21372 | 0.004177 | 0.011752 |
| SAMD7   | -0.00727 | 0.923304 | 0.946809 |
| SAMD8   | -0.02801 | 0.710522 | 0.789363 |
| SAMD9L  | 0.334054 | 5.19E-06 | 3.68E-05 |
| SAMD9   | 0.420627 | 5.04E-09 | 8.74E-08 |
| SAMHD1  | -0.23487 | 0.001601 | 0.005155 |
| SAMM50  | 0.103017 | 0.171194 | 0.262765 |
| SAMSN1  | 0.031931 | 0.672205 | 0.758816 |
| SAP130  | 0.020392 | 0.787022 | 0.849134 |
| SAP18   | 0.19666  | 0.008513 | 0.021534 |
| SAP30BP | 0.20334  | 0.006483 | 0.017094 |
| SAP30L  | -0.33021 | 6.75E-06 | 4.61E-05 |
| SAP30   | -0.10361 | 0.168728 | 0.259805 |
| SAPS1   | 0.128888 | 0.086415 | 0.151419 |
| SAPS2   | -0.24812 | 0.00084  | 0.002958 |
| SAPS3   | 0.010599 | 0.888334 | 0.922434 |
| SAR1A   | 0.114457 | 0.128188 | 0.20811  |
| SAR1B   | -0.0863  | 0.252037 | 0.357933 |
| SARDH   | -0.09595 | 0.202626 | 0.301167 |
| SARM1   | -0.3199  | 1.34E-05 | 8.39E-05 |
| SARNP   | 0.286624 | 0.000105 | 0.000496 |
| SARS2   | 0.11026  | 0.142877 | 0.227184 |
| SARS    | -0.0489  | 0.516896 | 0.623086 |
| SART1   | 0.303205 | 3.89E-05 | 0.000211 |
| SART3   | -0.29298 | 7.22E-05 | 0.000358 |
| SASH1   | -0.36141 | 7.18E-07 | 6.54E-06 |
| SASH3   | 0.001572 | 0.983387 | 0.988386 |
| SASS6   | -0.03264 | 0.665351 | 0.75302  |
| SAT1    | 0.321953 | 1.17E-05 | 7.47E-05 |
| SAT2    | -0.29864 | 5.14E-05 | 0.000269 |
| SATB1   | -0.23843 | 0.001351 | 0.004447 |
| SATB2   | 0.09746  | 0.195598 | 0.292436 |
| SATL1   | -0.16575 | 0.027023 | 0.057304 |



|          |          |          |          |
|----------|----------|----------|----------|
| SAV1     | 0.023349 | 0.757045 | 0.82624  |
| SBDSP1   | -0.19268 | 0.009973 | 0.024645 |
| SBDS     | 0.032602 | 0.665733 | 0.753316 |
| SBF1P1   | -0.04057 | 0.59077  | 0.688506 |
| SBF1     | 0.066032 | 0.381176 | 0.493898 |
| SBF2     | -0.1216  | 0.105901 | 0.178936 |
| SBK1     | -0.19647 | 0.008579 | 0.021662 |
| SBK2     | -0.30479 | 3.52E-05 | 0.000193 |
| SBN01    | -0.24293 | 0.001085 | 0.003685 |
| SBN02    | 0.430809 | 1.94E-09 | 3.76E-08 |
| SBSN     | 0.137618 | 0.066976 | 0.122537 |
| SC4MOL   | 0.337892 | 3.98E-06 | 2.90E-05 |
| SC5DL    | -0.08498 | 0.259388 | 0.365792 |
| SC65     | 0.051457 | 0.495156 | 0.60313  |
| SCAF1    | 0.189374 | 0.011351 | 0.027523 |
| SCAI     | -0.35154 | 1.50E-06 | 1.23E-05 |
| SCAMP1   | -0.24371 | 0.001045 | 0.003564 |
| SCAMP2   | 0.293005 | 7.21E-05 | 0.000358 |
| SCAMP3   | 0.138515 | 0.065198 | 0.119795 |
| SCAMP4   | 0.016233 | 0.829713 | 0.879437 |
| SCAMP5   | -0.3293  | 7.18E-06 | 4.86E-05 |
| SCAND1   | 0.083822 | 0.265964 | 0.373454 |
| SCAND2   | -0.12638 | 0.092773 | 0.160331 |
| SCAND3   | -0.12262 | 0.102971 | 0.174836 |
| SCAPER   | -0.31005 | 2.53E-05 | 0.000145 |
| SCAP     | -0.13748 | 0.06725  | 0.122994 |
| SCARA3   | 0.079013 | 0.294467 | 0.404388 |
| SCARA5   | -0.17488 | 0.019554 | 0.043567 |
| SCARB1   | 0.023063 | 0.759926 | 0.828606 |
| SCARB2   | -0.28305 | 0.000129 | 0.000594 |
| SCARF1   | -0.12582 | 0.094231 | 0.162381 |
| SCARF2   | 0.218849 | 0.003337 | 0.009661 |
| SCARNA10 | -0.10951 | 0.145642 | 0.230745 |
| SCARNA11 | -0.19253 | 0.010031 | 0.024763 |
| SCARNA12 | -0.11601 | 0.123066 | 0.20125  |
| SCARNA15 | -0.13136 | 0.0805   | 0.142943 |
| SCARNA16 | -0.10421 | 0.166278 | 0.256753 |
| SCARNA17 | 0.056706 | 0.452154 | 0.563065 |
| SCARNA18 | -0.00641 | 0.932322 | 0.953391 |
| SCARNA1  | -0.02453 | 0.745201 | 0.816512 |
| SCARNA20 | 0.061613 | 0.413929 | 0.526019 |
| SCARNA21 | -0.05248 | 0.486624 | 0.595415 |
| SCARNA22 | -0.21292 | 0.004323 | 0.012079 |
| SCARNA2  | 0.057166 | 0.448488 | 0.559732 |
| SCARNA3  | 0.016185 | 0.830212 | 0.879698 |
| SCARNA4  | 0.055709 | 0.46016  | 0.570591 |
| SCARNA5  | 0.059072 | 0.433479 | 0.545129 |
| SCARNA6  | 0.182522 | 0.014748 | 0.034382 |
| SCARNA7  | 0.121787 | 0.105356 | 0.178228 |
| SCARNA8  | -0.05894 | 0.434548 | 0.546091 |
| SCARNA9L | 0.143105 | 0.056698 | 0.106534 |
| SCARNA9  | -0.0406  | 0.590503 | 0.688357 |
| SCCPDH   | 0.272382 | 0.000235 | 0.000994 |
| SCD5     | -0.18379 | 0.01406  | 0.032967 |

|         |          |          |          |
|---------|----------|----------|----------|
| SCD     | 0.097093 | 0.197293 | 0.294469 |
| SCEL    | 0.620686 | 2.44E-20 | 7.66E-18 |
| SCFD1   | -0.17123 | 0.022294 | 0.048642 |
| SCFD2   | -0.13986 | 0.062605 | 0.115729 |
| SCG2    | -0.35696 | 1.00E-06 | 8.71E-06 |
| SCG3    | -0.24159 | 0.001159 | 0.003902 |
| SCG5    | -0.23851 | 0.001345 | 0.004432 |
| SCGB1A1 | 0.093462 | 0.214654 | 0.315487 |
| SCGB1C1 | -0.19624 | 0.008656 | 0.021826 |
| SCGB1D1 | -0.19267 | 0.009977 | 0.024649 |
| SCGB1D2 | -0.29799 | 5.35E-05 | 0.000278 |
| SCGB1D4 | 0.118671 | 0.114636 | 0.190518 |
| SCGB2A1 | -0.09105 | 0.226793 | 0.329386 |
| SCGB2A2 | -0.10294 | 0.171504 | 0.263179 |
| SCGB3A1 | 0.088204 | 0.241687 | 0.346163 |
| SCGB3A2 | -0.00406 | 0.957131 | 0.97058  |
| SCGBL   | -0.16207 | 0.030668 | 0.063849 |
| SCGN    | -0.17274 | 0.021123 | 0.046492 |
| SCHIP1  | -0.04506 | 0.550375 | 0.6527   |
| SCIN    | -0.06847 | 0.36379  | 0.477091 |
| SCLT1   | -0.10689 | 0.155594 | 0.243603 |
| SCLY    | -0.03786 | 0.615821 | 0.710701 |
| SCMH1   | -0.2681  | 0.000297 | 0.001217 |
| SCML1   | -0.02896 | 0.701224 | 0.781888 |
| SCML2   | -0.56229 | 3.16E-16 | 3.42E-14 |
| SCML4   | -0.21136 | 0.004624 | 0.012807 |
| SCN10A  | -0.02515 | 0.738934 | 0.811715 |
| SCN11A  | -0.27344 | 0.000222 | 0.000944 |
| SCN1A   | -0.13065 | 0.082165 | 0.14535  |
| SCN1B   | -0.19981 | 0.007495 | 0.01933  |
| SCN2A   | -0.12997 | 0.083792 | 0.147661 |
| SCN2B   | -0.05593 | 0.458362 | 0.569003 |
| SCN3A   | -0.28502 | 0.000115 | 0.000538 |
| SCN3B   | -0.34927 | 1.77E-06 | 1.43E-05 |
| SCN4A   | -0.26853 | 0.00029  | 0.001193 |
| SCN4B   | -0.10833 | 0.150065 | 0.236369 |
| SCN5A   | 0.1423   | 0.058119 | 0.108717 |
| SCN7A   | -0.11143 | 0.138669 | 0.221848 |
| SCN8A   | -0.44348 | 5.66E-10 | 1.30E-08 |
| SCN9A   | -0.0506  | 0.502384 | 0.609494 |
| SCNM1   | 0.371389 | 3.33E-07 | 3.34E-06 |
| SCNN1A  | 0.416941 | 7.07E-09 | 1.17E-07 |
| SCNN1B  | -0.20893 | 0.00513  | 0.014002 |
| SCNN1D  | 0.10512  | 0.162575 | 0.252098 |
| SCNN1G  | -0.05799 | 0.441975 | 0.553771 |
| SC01    | -0.3221  | 1.16E-05 | 7.41E-05 |
| SC02    | 0.261935 | 0.000413 | 0.001613 |
| SCOC    | -0.15881 | 0.034229 | 0.06998  |
| SCP2    | 0.086373 | 0.251636 | 0.357557 |
| SCPEP1  | -0.25661 | 0.000545 | 0.002047 |
| SCRG1   | -0.01163 | 0.877559 | 0.915042 |
| SCRIB   | 0.207674 | 0.005409 | 0.014632 |
| SCRN1   | -0.27501 | 0.000203 | 0.000877 |
| SCRN2   | 0.225592 | 0.002464 | 0.007466 |

|         |          |          |          |
|---------|----------|----------|----------|
| SCRN3   | -0.18997 | 0.011089 | 0.026988 |
| SCRT1   | -0.20314 | 0.006537 | 0.01722  |
| SCRT2   | -0.19943 | 0.007612 | 0.019579 |
| SCTR    | 0.172718 | 0.02114  | 0.046515 |
| SCT     | 0.377763 | 2.01E-07 | 2.15E-06 |
| SCUBE1  | -0.13346 | 0.07573  | 0.135838 |
| SCUBE2  | 0.131805 | 0.079471 | 0.141381 |
| SCUBE3  | 0.071284 | 0.344377 | 0.456737 |
| SCXB    | 0.149893 | 0.045821 | 0.089356 |
| SCYL1   | 0.212648 | 0.004375 | 0.012201 |
| SCYL2   | -0.19454 | 0.009267 | 0.023125 |
| SCYL3   | 0.070863 | 0.347242 | 0.459688 |
| SDAD1   | -0.20153 | 0.006986 | 0.018218 |
| SDC1    | 0.542581 | 5.15E-15 | 4.03E-13 |
| SDC2    | -0.21696 | 0.003627 | 0.010392 |
| SDC3    | -0.10524 | 0.162085 | 0.251508 |
| SDC4P   | 0.063061 | 0.403015 | 0.515673 |
| SDC4    | 0.48183  | 9.81E-12 | 3.52E-10 |
| SDCBP2  | 0.623383 | 1.50E-20 | 4.95E-18 |
| SDCBP   | 0.021212 | 0.778676 | 0.842869 |
| SDCCAG1 | -0.13406 | 0.074415 | 0.133868 |
| SDCCAG3 | 0.110297 | 0.142742 | 0.22706  |
| SDCCAG8 | 0.095308 | 0.205694 | 0.304856 |
| SDF2L1  | -0.14386 | 0.055397 | 0.104604 |
| SDF2    | 0.250222 | 0.000755 | 0.002706 |
| SDF4    | -0.03088 | 0.682452 | 0.766968 |
| SDHAF1  | 0.057747 | 0.443879 | 0.555629 |
| SDHAF2  | 0.032598 | 0.665773 | 0.753319 |
| SDHAP1  | 0.243851 | 0.001038 | 0.003542 |
| SDHAP2  | 0.268526 | 0.00029  | 0.001193 |
| SDHAP3  | -0.08057 | 0.285046 | 0.394022 |
| SDHA    | 0.132141 | 0.0787   | 0.140237 |
| SDHB    | 0.049919 | 0.508147 | 0.614826 |
| SDHC    | 0.175311 | 0.019252 | 0.042994 |
| SDHD    | 0.115105 | 0.126026 | 0.205325 |
| SDK1    | -0.41932 | 5.68E-09 | 9.69E-08 |
| SDK2    | -0.39043 | 7.14E-08 | 8.68E-07 |
| SDPR    | -0.25584 | 0.000567 | 0.002117 |
| SDR16C5 | 0.553073 | 1.19E-15 | 1.08E-13 |
| SDR39U1 | -0.12658 | 0.092238 | 0.159653 |
| SDR42E1 | 0.283821 | 0.000123 | 0.000571 |
| SDR9C7  | -0.05421 | 0.472338 | 0.582187 |
| SDSL    | -0.15217 | 0.042582 | 0.08405  |
| SDS     | 0.176827 | 0.018217 | 0.041014 |
| SEBOX   | -0.1511  | 0.044084 | 0.086557 |
| SEC11A  | 0.052566 | 0.485887 | 0.594697 |
| SEC11C  | -0.48731 | 5.27E-12 | 2.04E-10 |
| SEC13   | 0.046793 | 0.535104 | 0.638766 |
| SEC14L1 | -0.30296 | 3.95E-05 | 0.000214 |
| SEC14L2 | 0.520139 | 1.00E-13 | 5.92E-12 |
| SEC14L3 | -0.24636 | 0.000917 | 0.003186 |
| SEC14L4 | 0.231494 | 0.001877 | 0.005904 |
| SEC14L5 | -0.28447 | 0.000119 | 0.000553 |
| SEC16A  | -0.38974 | 7.56E-08 | 9.15E-07 |

|           |          |          |          |
|-----------|----------|----------|----------|
| SEC16B    | 0.300251 | 4.66E-05 | 0.000247 |
| SEC1      | 0.32898  | 7.34E-06 | 4.96E-05 |
| SEC22A    | 0.085294 | 0.257632 | 0.363965 |
| SEC22B    | -0.14937 | 0.04659  | 0.09057  |
| SEC22C    | -0.20727 | 0.005501 | 0.014841 |
| SEC23A    | 0.102128 | 0.174936 | 0.267309 |
| SEC23B    | -0.45578 | 1.63E-10 | 4.34E-09 |
| SEC23IP   | -0.05491 | 0.466632 | 0.576699 |
| SEC24A    | -0.12289 | 0.102225 | 0.173779 |
| SEC24B    | -0.13296 | 0.076858 | 0.137502 |
| SEC24C    | 0.010263 | 0.891854 | 0.924679 |
| SEC24D    | -0.24683 | 0.000895 | 0.003126 |
| SEC31A    | -0.15086 | 0.044431 | 0.087108 |
| SEC31B    | -0.01709 | 0.820925 | 0.873256 |
| SEC61A1   | -0.12201 | 0.104723 | 0.17734  |
| SEC61A2   | -0.26348 | 0.00038  | 0.001503 |
| SEC61B    | -0.2058  | 0.005853 | 0.015653 |
| SEC61G    | -0.00886 | 0.906601 | 0.934776 |
| SEC62     | -0.2321  | 0.001824 | 0.005763 |
| SEC63     | -0.47609 | 1.86E-11 | 6.22E-10 |
| SECISBP2I | -0.28473 | 0.000117 | 0.000546 |
| SECISBP2  | -0.32495 | 9.62E-06 | 6.28E-05 |
| SECTM1    | 0.16027  | 0.032595 | 0.067131 |
| SEH1L     | -0.07757 | 0.303425 | 0.413788 |
| SEL1L2    | 0.007148 | 0.924556 | 0.947803 |
| SEL1L3    | 0.220323 | 0.003125 | 0.009145 |
| SEL1L     | -0.28192 | 0.000138 | 0.000629 |
| SELENBP1  | 0.319459 | 1.38E-05 | 8.61E-05 |
| SELE      | -0.18863 | 0.011682 | 0.028185 |
| SELK      | -0.15161 | 0.043368 | 0.085371 |
| SELL      | 0.024456 | 0.745913 | 0.817157 |
| SELM      | -0.01911 | 0.800169 | 0.859406 |
| SELO      | 0.034422 | 0.648283 | 0.737784 |
| SELPLG    | 0.40819  | 1.55E-08 | 2.29E-07 |
| SELP      | -0.14344 | 0.056115 | 0.105758 |
| SELS      | 0.127425 | 0.090076 | 0.156476 |
| SELT      | -0.11904 | 0.113493 | 0.189003 |
| SELV      | -0.08192 | 0.276981 | 0.384974 |
| SEMA3A    | 0.064327 | 0.393624 | 0.506312 |
| SEMA3B    | 0.529864 | 2.84E-14 | 1.89E-12 |
| SEMA3C    | 0.343751 | 2.63E-06 | 2.02E-05 |
| SEMA3D    | -0.14044 | 0.061519 | 0.113977 |
| SEMA3E    | -0.18712 | 0.012382 | 0.029635 |
| SEMA3F    | 0.288494 | 9.41E-05 | 0.00045  |
| SEMA3G    | -0.29812 | 5.31E-05 | 0.000276 |
| SEMA4A    | 0.135165 | 0.072037 | 0.130362 |
| SEMA4B    | 0.428053 | 2.52E-09 | 4.74E-08 |
| SEMA4C    | 0.2211   | 0.003018 | 0.008895 |
| SEMA4D    | -0.22648 | 0.002366 | 0.00721  |
| SEMA4F    | -0.11503 | 0.126269 | 0.205636 |
| SEMA4G    | 0.367291 | 4.58E-07 | 4.41E-06 |
| SEMA5A    | -0.30728 | 3.02E-05 | 0.00017  |
| SEMA5B    | -0.06755 | 0.370285 | 0.483493 |
| SEMA6A    | -0.23422 | 0.001651 | 0.005296 |

|           |          |          |          |
|-----------|----------|----------|----------|
| SEMA6B    | -0.06938 | 0.357457 | 0.470597 |
| SEMA6C    | -0.10041 | 0.182356 | 0.276145 |
| SEMA6D    | -0.28704 | 0.000102 | 0.000486 |
| SEMA7A    | 0.506017 | 5.80E-13 | 2.83E-11 |
| SEMG1     | 0.14331  | 0.056342 | 0.106051 |
| SEMG2     | 0.054647 | 0.46877  | 0.578799 |
| SENP1     | -0.36842 | 4.20E-07 | 4.08E-06 |
| SENP2     | -0.1034  | 0.169609 | 0.260891 |
| SENP3     | -0.42655 | 2.90E-09 | 5.40E-08 |
| SENP5     | -0.08589 | 0.254299 | 0.360518 |
| SENP6     | -0.38276 | 1.34E-07 | 1.51E-06 |
| SENP7     | -0.14833 | 0.048156 | 0.093054 |
| SENP8     | -0.24728 | 0.000876 | 0.003069 |
| 15-Sep    | 0.072917 | 0.333408 | 0.44561  |
| SEPHS1    | -0.32038 | 1.30E-05 | 8.16E-05 |
| SEPHS2    | 0.181859 | 0.015119 | 0.035074 |
| SEPN1     | -0.15342 | 0.040897 | 0.081211 |
| SEPP1     | -0.4761  | 1.86E-11 | 6.22E-10 |
| SEPSECS   | -0.17083 | 0.022612 | 0.049222 |
| 10-Sep    | 0.240239 | 0.001238 | 0.004129 |
| 11-Sep    | 0.09027  | 0.230793 | 0.33424  |
| 12-Sep    | -0.03323 | 0.659692 | 0.748221 |
| 14-Sep    | 0.055389 | 0.46274  | 0.573071 |
| 1-Sep     | -0.12945 | 0.085046 | 0.149457 |
| 2-Sep     | 0.070291 | 0.351155 | 0.463781 |
| 3-Sep     | -0.24135 | 0.001173 | 0.003939 |
| 4-Sep     | 0.001999 | 0.978877 | 0.985455 |
| 5-Sep     | -0.3512  | 1.54E-06 | 1.26E-05 |
| 6-Sep     | 0.015582 | 0.836445 | 0.884485 |
| SEPT7L    | -0.10631 | 0.157836 | 0.246217 |
| SEPT7P2   | -0.30426 | 3.64E-05 | 0.000199 |
| 7-Sep     | -0.06834 | 0.364701 | 0.477938 |
| 8-Sep     | 0.138292 | 0.065636 | 0.12052  |
| 9-Sep     | 0.375694 | 2.37E-07 | 2.49E-06 |
| SEPW1     | 0.384828 | 1.13E-07 | 1.30E-06 |
| SEPX1     | -0.08153 | 0.279322 | 0.387709 |
| SERAC1    | -0.20762 | 0.005422 | 0.014659 |
| SERBP1    | 0.06557  | 0.384525 | 0.497325 |
| SERF1A    | -0.196   | 0.008743 | 0.022014 |
| SERF2     | 0.271411 | 0.000248 | 0.00104  |
| SERGEF    | -0.22893 | 0.002114 | 0.006545 |
| SERHL2    | 0.054726 | 0.468124 | 0.578188 |
| SERHL     | 0.053011 | 0.482204 | 0.591574 |
| SERINC1   | -0.36464 | 5.62E-07 | 5.28E-06 |
| SERINC2   | 0.561142 | 3.73E-16 | 3.86E-14 |
| SERINC3   | -0.12251 | 0.103287 | 0.175298 |
| SERINC4   | 0.121053 | 0.107486 | 0.181119 |
| SERINC5   | -0.07683 | 0.308067 | 0.418483 |
| SERP1     | -0.10239 | 0.173844 | 0.266067 |
| SERP2     | -0.22497 | 0.002535 | 0.007651 |
| SERPINA1C | -0.34371 | 2.64E-06 | 2.03E-05 |
| SERPINA11 | -0.21821 | 0.003432 | 0.009905 |
| SERPINA12 | -0.14976 | 0.046023 | 0.089641 |
| SERPINA13 | -0.0631  | 0.402709 | 0.515382 |

|           |          |          |          |
|-----------|----------|----------|----------|
| SERPINA1  | -0.07539 | 0.317237 | 0.42875  |
| SERPINA3  | 0.212758 | 0.004355 | 0.012152 |
| SERPINA4  | 0.387254 | 9.29E-08 | 1.09E-06 |
| SERPINA5  | 0.188635 | 0.01168  | 0.028185 |
| SERPINA6  | -0.12621 | 0.093221 | 0.160968 |
| SERPINA7  | -0.13806 | 0.066102 | 0.121242 |
| SERPINA9  | -0.04059 | 0.590571 | 0.688397 |
| SERPINB10 | 0.049574 | 0.511085 | 0.617323 |
| SERPINB11 | 0.237978 | 0.00138  | 0.004535 |
| SERPINB12 | 0.158411 | 0.034692 | 0.070737 |
| SERPINB13 | 0.123266 | 0.101163 | 0.172285 |
| SERPINB1  | 0.402982 | 2.45E-08 | 3.43E-07 |
| SERPINB2  | 0.436414 | 1.13E-09 | 2.35E-08 |
| SERPINB3  | 0.413103 | 1.00E-08 | 1.58E-07 |
| SERPINB4  | 0.300528 | 4.58E-05 | 0.000244 |
| SERPINB5  | 0.627802 | 6.70E-21 | 2.55E-18 |
| SERPINB6  | 0.357176 | 9.87E-07 | 8.57E-06 |
| SERPINB7  | 0.410707 | 1.24E-08 | 1.90E-07 |
| SERPINB8  | 0.306822 | 3.11E-05 | 0.000174 |
| SERPINB9  | 0.206749 | 0.005624 | 0.015129 |
| SERPINC1  | 0.030485 | 0.686249 | 0.769919 |
| SERPIND1  | -0.12576 | 0.094404 | 0.162622 |
| SERPINE1  | 0.072546 | 0.335879 | 0.448035 |
| SERPINE2  | -0.31295 | 2.11E-05 | 0.000124 |
| SERPINE3  | -0.21131 | 0.004635 | 0.012831 |
| SERPINF1  | 0.038534 | 0.609581 | 0.705069 |
| SERPINF2  | -0.30174 | 4.26E-05 | 0.000229 |
| SERPING1  | 0.181148 | 0.015527 | 0.035858 |
| SERPINH1  | 0.293109 | 7.17E-05 | 0.000356 |
| SERPINI1  | -0.36615 | 5.00E-07 | 4.76E-06 |
| SERPINI2  | -0.13707 | 0.068071 | 0.124276 |
| SERTAD1   | 0.368483 | 4.18E-07 | 4.06E-06 |
| SERTAD2   | 0.047088 | 0.532532 | 0.636655 |
| SERTAD3   | 0.408987 | 1.44E-08 | 2.16E-07 |
| SERTAD4   | 0.10532  | 0.161772 | 0.25111  |
| SESN1     | -0.42181 | 4.52E-09 | 7.94E-08 |
| SESN2     | -0.30022 | 4.67E-05 | 0.000248 |
| SESN3     | -0.23314 | 0.001737 | 0.005528 |
| SESTD1    | 0.153395 | 0.040929 | 0.081267 |
| SETBP1    | -0.46317 | 7.51E-11 | 2.18E-09 |
| SETD1A    | -0.05166 | 0.493447 | 0.601802 |
| SETD1B    | -0.3017  | 4.27E-05 | 0.000229 |
| SETD2     | -0.20685 | 0.005599 | 0.015068 |
| SETD3     | 0.098905 | 0.189018 | 0.284383 |
| SETD4     | 0.258448 | 0.000495 | 0.001887 |
| SETD5     | -0.07493 | 0.320172 | 0.431949 |
| SETD6     | -0.1243  | 0.098321 | 0.168227 |
| SETD7     | -0.16016 | 0.032717 | 0.067356 |
| SETD8     | 0.101408 | 0.178016 | 0.270838 |
| SETDB1    | -0.0043  | 0.954525 | 0.968782 |
| SETDB2    | -0.24911 | 0.000799 | 0.002847 |
| SETMAR    | -0.17359 | 0.020491 | 0.045343 |
| SETX      | -0.27668 | 0.000185 | 0.000809 |
| SET       | 0.031638 | 0.675049 | 0.761245 |

|           |          |          |          |
|-----------|----------|----------|----------|
| SEZ6L2    | -0.13797 | 0.06628  | 0.121501 |
| SEZ6L     | -0.24406 | 0.001027 | 0.003513 |
| SEZ6      | -0.30578 | 3.31E-05 | 0.000184 |
| SF1       | -0.17982 | 0.016312 | 0.037428 |
| SF3A1     | -0.31782 | 1.54E-05 | 9.45E-05 |
| SF3A2     | 0.232021 | 0.001831 | 0.00578  |
| SF3A3     | -0.20574 | 0.005867 | 0.01568  |
| SF3B14    | 0.363884 | 5.95E-07 | 5.53E-06 |
| SF3B1     | 0.135539 | 0.071245 | 0.129165 |
| SF3B2     | 0.174454 | 0.019859 | 0.044178 |
| SF3B3     | -0.02613 | 0.729128 | 0.803861 |
| SF3B4     | 0.364484 | 5.68E-07 | 5.32E-06 |
| SF3B5     | -0.05857 | 0.437401 | 0.549049 |
| SF4       | 0.084084 | 0.264465 | 0.371733 |
| SFI1      | -0.02165 | 0.774231 | 0.839115 |
| SFMBT1    | -0.1132  | 0.132461 | 0.213749 |
| SFMBT2    | -0.29417 | 6.73E-05 | 0.000338 |
| SFN       | 0.627363 | 7.26E-21 | 2.71E-18 |
| SFPQ      | -0.1563  | 0.037209 | 0.075004 |
| SFRP1     | -0.29952 | 4.87E-05 | 0.000257 |
| SFRP2     | 0.188986 | 0.011523 | 0.027868 |
| SFRP4     | 0.106431 | 0.157367 | 0.24565  |
| SFRP5     | 0.163214 | 0.029493 | 0.061748 |
| SFRS11    | 0.001455 | 0.984624 | 0.98929  |
| SFRS12IP1 | -0.04663 | 0.536492 | 0.639997 |
| SFRS12    | -0.14305 | 0.05679  | 0.106685 |
| SFRS13A   | -0.00386 | 0.959252 | 0.972162 |
| SFRS13B   | -0.32883 | 7.41E-06 | 5.00E-05 |
| SFRS14    | -0.23273 | 0.001771 | 0.005622 |
| SFRS15    | -0.03689 | 0.624889 | 0.718446 |
| SFRS16    | 0.125292 | 0.095633 | 0.164406 |
| SFRS17A   | -0.08609 | 0.253214 | 0.359316 |
| SFRS18    | -0.17398 | 0.0202   | 0.044784 |
| SFRS1     | 0.064486 | 0.392453 | 0.505101 |
| SFRS2B    | -0.1919  | 0.010285 | 0.025282 |
| SFRS2IP   | -0.25682 | 0.000539 | 0.002028 |
| SFRS2     | 0.24191  | 0.001141 | 0.003851 |
| SFRS3     | 0.236482 | 0.001483 | 0.004821 |
| SFRS4     | 0.212852 | 0.004337 | 0.012115 |
| SFRS5     | -0.03249 | 0.666791 | 0.754126 |
| SFRS6     | -0.24435 | 0.001013 | 0.00347  |
| SFRS7     | 0.304168 | 3.66E-05 | 0.0002   |
| SFRS8     | -0.07267 | 0.335053 | 0.447195 |
| SFRS9     | -0.10004 | 0.183954 | 0.278054 |
| SFT2D1    | 0.310468 | 2.47E-05 | 0.000142 |
| SFT2D2    | -0.00461 | 0.951314 | 0.966989 |
| SFT2D3    | 0.060724 | 0.420705 | 0.532895 |
| SFTA1P    | 0.065385 | 0.385871 | 0.498605 |
| SFTA2     | 0.679094 | 2.05E-25 | 2.53E-22 |
| SFTA3     | 0.000525 | 0.994446 | 0.99626  |
| SFTPA1    | 0.005836 | 0.938373 | 0.958341 |
| SFTPA2    | 0.35484  | 1.17E-06 | 9.97E-06 |
| SFTPB     | -0.08985 | 0.233006 | 0.336827 |
| SFTPC     | -0.21966 | 0.003219 | 0.00938  |

|          |          |          |          |
|----------|----------|----------|----------|
| SFTPD    | -0.04587 | 0.543212 | 0.64622  |
| SFXN1    | -0.07135 | 0.343963 | 0.456355 |
| SFXN2    | -0.03192 | 0.672349 | 0.758818 |
| SFXN3    | 0.53338  | 1.78E-14 | 1.25E-12 |
| SFXN4    | -0.01129 | 0.881098 | 0.917522 |
| SFXN5    | -0.28426 | 0.00012  | 0.000559 |
| SGCA     | 0.176056 | 0.018737 | 0.042012 |
| SGCB     | -0.11943 | 0.112332 | 0.187622 |
| SGCD     | -0.12061 | 0.108793 | 0.182854 |
| SGCE     | -0.36891 | 4.04E-07 | 3.96E-06 |
| SGCG     | 0.021129 | 0.779518 | 0.843219 |
| SGCZ     | -0.17283 | 0.021055 | 0.046368 |
| SGEF     | -0.46618 | 5.45E-11 | 1.66E-09 |
| SGIP1    | 0.02686  | 0.72192  | 0.797991 |
| SGK196   | -0.19529 | 0.008992 | 0.022519 |
| SGK1     | -0.11451 | 0.128019 | 0.207853 |
| SGK223   | 0.367675 | 4.45E-07 | 4.29E-06 |
| SGK269   | -0.11272 | 0.134107 | 0.215894 |
| SGK2     | 0.192859 | 0.009903 | 0.024494 |
| SGK3     | -0.35895 | 8.64E-07 | 7.65E-06 |
| SGK494   | 0.153025 | 0.041425 | 0.082087 |
| SGMS1    | -0.40858 | 1.50E-08 | 2.22E-07 |
| SGMS2    | 0.209087 | 0.005095 | 0.013921 |
| SGOL1    | 0.311312 | 2.34E-05 | 0.000135 |
| SGOL2    | 0.104505 | 0.165062 | 0.255234 |
| SGPL1    | 0.000785 | 0.991702 | 0.993863 |
| SGPP1    | -0.21323 | 0.004266 | 0.011951 |
| SGPP2    | 0.338004 | 3.94E-06 | 2.88E-05 |
| SGSH     | -0.26366 | 0.000377 | 0.00149  |
| SGSM1    | -0.45993 | 1.06E-10 | 2.94E-09 |
| SGSM2    | -0.33755 | 4.07E-06 | 2.97E-05 |
| SGSM3    | 0.098704 | 0.189923 | 0.285432 |
| SGTA     | 0.020195 | 0.78903  | 0.850539 |
| SGTB     | -0.32675 | 8.53E-06 | 5.64E-05 |
| SH2B1    | 0.107108 | 0.154727 | 0.242401 |
| SH2B2    | 0.091624 | 0.223847 | 0.326067 |
| SH2B3    | -0.26861 | 0.000289 | 0.001189 |
| SH2D1A   | -0.05036 | 0.504363 | 0.611333 |
| SH2D1B   | 0.106831 | 0.155805 | 0.243857 |
| SH2D2A   | 0.259837 | 0.000461 | 0.00177  |
| SH2D3A   | 0.587646 | 6.53E-18 | 1.13E-15 |
| SH2D3C   | -0.18863 | 0.011682 | 0.028185 |
| SH2D4A   | 0.516767 | 1.53E-13 | 8.73E-12 |
| SH2D4B   | 0.169228 | 0.023934 | 0.051697 |
| SH2D5    | 0.159787 | 0.03313  | 0.068117 |
| SH2D6    | 0.146936 | 0.050324 | 0.09651  |
| SH2D7    | 0.098136 | 0.192498 | 0.288608 |
| SH3BGRL2 | -0.00352 | 0.962833 | 0.974713 |
| SH3BGRL3 | 0.490863 | 3.50E-12 | 1.42E-10 |
| SH3BGRL  | -0.1189  | 0.113926 | 0.189611 |
| SH3BGR   | -0.23464 | 0.001618 | 0.005204 |
| SH3BP1   | 0.220906 | 0.003045 | 0.008955 |
| SH3BP2   | 0.300431 | 4.61E-05 | 0.000245 |
| SH3BP4   | 0.11533  | 0.125284 | 0.204352 |



|          |          |          |          |
|----------|----------|----------|----------|
| SH3BP5L  | 0.019015 | 0.801098 | 0.860031 |
| SH3BP5   | -0.0561  | 0.457017 | 0.568046 |
| SH3D19   | 0.083145 | 0.269861 | 0.377625 |
| SH3D20   | 0.496746 | 1.76E-12 | 7.77E-11 |
| SH3GL1   | 0.363522 | 6.12E-07 | 5.67E-06 |
| SH3GL2   | -0.20922 | 0.005067 | 0.013847 |
| SH3GL3   | -0.35484 | 1.17E-06 | 9.97E-06 |
| SH3GLB1  | 0.12284  | 0.102357 | 0.173973 |
| SH3GLB2  | 0.197892 | 0.008101 | 0.020662 |
| SH3KBP1  | 0.321322 | 1.22E-05 | 7.75E-05 |
| SH3PXD2A | -0.08424 | 0.263604 | 0.370812 |
| SH3PXD2B | 0.065357 | 0.386073 | 0.498805 |
| SH3RF1   | 0.258129 | 0.000504 | 0.001915 |
| SH3RF2   | 0.559577 | 4.68E-16 | 4.73E-14 |
| SH3RF3   | -0.17764 | 0.017679 | 0.040013 |
| SH3TC1   | 0.104523 | 0.164986 | 0.255187 |
| SH3TC2   | 0.396949 | 4.12E-08 | 5.36E-07 |
| SH3YL1   | 0.168194 | 0.02482  | 0.053305 |
| SHANK1   | -0.1732  | 0.020781 | 0.045837 |
| SHANK2   | -0.0074  | 0.921883 | 0.945749 |
| SHANK3   | -0.23495 | 0.001595 | 0.005139 |
| SHARPIN  | 0.350042 | 1.67E-06 | 1.36E-05 |
| SHBG     | -0.36075 | 7.55E-07 | 6.83E-06 |
| SHB      | 0.377827 | 2.00E-07 | 2.14E-06 |
| SHC1     | 0.250409 | 0.000748 | 0.002686 |
| SHC2     | 0.008164 | 0.91387  | 0.93982  |
| SHC3     | 0.063498 | 0.399757 | 0.5123   |
| SHC4     | -0.19457 | 0.009254 | 0.023102 |
| SHCBP1   | 0.367672 | 4.45E-07 | 4.29E-06 |
| SHD      | -0.2994  | 4.91E-05 | 0.000258 |
| SHE      | -0.27743 | 0.000177 | 0.000781 |
| SHFM1    | 0.290737 | 8.25E-05 | 0.000402 |
| SHF      | 0.376811 | 2.17E-07 | 2.30E-06 |
| SHH      | 0.29747  | 5.52E-05 | 0.000285 |
| SHISA2   | 0.225561 | 0.002468 | 0.007474 |
| SHISA3   | -0.12819 | 0.08814  | 0.153802 |
| SHISA4   | 0.263143 | 0.000387 | 0.001526 |
| SHISA5   | 0.47454  | 2.21E-11 | 7.27E-10 |
| SHISA6   | -0.0435  | 0.564245 | 0.664884 |
| SHISA7   | -0.33022 | 6.75E-06 | 4.61E-05 |
| SHISA9   | -0.28008 | 0.000153 | 0.000688 |
| SHKBP1   | 0.368822 | 4.07E-07 | 3.98E-06 |
| SHMT1    | -0.05579 | 0.459543 | 0.570112 |
| SHMT2    | -0.06216 | 0.409783 | 0.521835 |
| SHOC2    | -0.11391 | 0.130023 | 0.210536 |
| SHOX2    | 0.121557 | 0.10602  | 0.179106 |
| SHOX     | 0.130324 | 0.082937 | 0.146454 |
| SHPK     | -0.36673 | 4.78E-07 | 4.56E-06 |
| SHPRH    | -0.32088 | 1.26E-05 | 7.94E-05 |
| SHQ1     | -0.14346 | 0.05608  | 0.105715 |
| SHROOM1  | 0.311252 | 2.35E-05 | 0.000136 |
| SHROOM2  | -0.1874  | 0.012251 | 0.029374 |
| SHROOM3  | 0.234236 | 0.00165  | 0.005293 |
| SHROOM4  | -0.18261 | 0.014701 | 0.034287 |

|          |          |          |          |
|----------|----------|----------|----------|
| SIAE     | -0.03752 | 0.61902  | 0.7134   |
| SIAH1    | 0.142767 | 0.057291 | 0.107484 |
| SIAH2    | 0.2417   | 0.001153 | 0.003884 |
| SIAH3    | -0.20497 | 0.006059 | 0.016104 |
| SIDT1    | 0.025906 | 0.731406 | 0.805907 |
| SIDT2    | -0.45521 | 1.73E-10 | 4.57E-09 |
| SIGIRR   | 0.217977 | 0.003468 | 0.00999  |
| SIGLEC10 | -0.067   | 0.374256 | 0.487326 |
| SIGLEC11 | -0.10387 | 0.167656 | 0.258558 |
| SIGLEC12 | 0.17739  | 0.017845 | 0.040336 |
| SIGLEC14 | 0.056997 | 0.44983  | 0.560785 |
| SIGLEC15 | 0.345766 | 2.28E-06 | 1.78E-05 |
| SIGLEC16 | -0.03662 | 0.627432 | 0.720574 |
| SIGLEC1  | 0.122719 | 0.102698 | 0.174464 |
| SIGLEC5  | -0.00131 | 0.986145 | 0.990252 |
| SIGLEC6  | -0.07056 | 0.34928  | 0.461922 |
| SIGLEC7  | 0.050071 | 0.506853 | 0.613711 |
| SIGLEC8  | -0.09238 | 0.220045 | 0.321784 |
| SIGLEC9  | 0.051025 | 0.498785 | 0.606169 |
| SIGLECP3 | -0.00353 | 0.962751 | 0.974709 |
| SIGMAR1  | 0.203004 | 0.006574 | 0.017309 |
| SIK1     | 0.19658  | 0.00854  | 0.021594 |
| SIK2     | -0.454   | 1.96E-10 | 5.08E-09 |
| SIK3     | -0.5254  | 5.09E-14 | 3.26E-12 |
| SIKE1    | 0.034245 | 0.64997  | 0.739032 |
| SIL1     | -0.12011 | 0.11027  | 0.184928 |
| SILV     | 0.13464  | 0.073161 | 0.131936 |
| SIM1     | -0.14833 | 0.04816  | 0.093054 |
| SIM2     | 0.384377 | 1.18E-07 | 1.35E-06 |
| SIN3A    | -0.18886 | 0.011581 | 0.027997 |
| SIN3B    | -0.08176 | 0.277917 | 0.386061 |
| SIP1     | 0.104419 | 0.165409 | 0.255611 |
| SIPA1L1  | 0.109775 | 0.144656 | 0.229424 |
| SIPA1L2  | -0.19577 | 0.00882  | 0.022177 |
| SIPA1L3  | -0.15835 | 0.034767 | 0.07086  |
| SIPA1    | 0.313939 | 1.98E-05 | 0.000117 |
| SIRPA    | -0.04357 | 0.563593 | 0.664312 |
| SIRPB1   | 0.024583 | 0.744641 | 0.816002 |
| SIRPB2   | 0.052592 | 0.485678 | 0.594589 |
| SIRPD    | -0.04226 | 0.575421 | 0.674846 |
| SIRPG    | 0.005269 | 0.94435  | 0.962506 |
| SIRT1    | -0.33451 | 5.03E-06 | 3.58E-05 |
| SIRT2    | -0.04135 | 0.583656 | 0.682226 |
| SIRT3    | 0.011477 | 0.879145 | 0.916068 |
| SIRT4    | -0.19713 | 0.008352 | 0.021192 |
| SIRT5    | 0.045664 | 0.545008 | 0.647811 |
| SIRT6    | 0.322448 | 1.14E-05 | 7.27E-05 |
| SIRT7    | 0.551473 | 1.49E-15 | 1.31E-13 |
| SIT1     | -0.02193 | 0.771399 | 0.837291 |
| SIVA1    | 0.06161  | 0.413946 | 0.526019 |
| SIX1     | 0.26986  | 0.00027  | 0.001119 |
| SIX2     | 0.036593 | 0.627721 | 0.720822 |
| SIX3     | -0.08788 | 0.243418 | 0.348087 |
| SIX4     | 0.156644 | 0.036791 | 0.074349 |

|         |          |          |          |
|---------|----------|----------|----------|
| SIX5    | 0.190843 | 0.010719 | 0.026213 |
| SIX6    | -0.03191 | 0.672451 | 0.758878 |
| SI      | -0.03229 | 0.668708 | 0.756027 |
| SKA1    | 0.188467 | 0.011757 | 0.028341 |
| SKA2    | -0.05426 | 0.471967 | 0.581874 |
| SKA3    | 0.429388 | 2.22E-09 | 4.24E-08 |
| SKAP1   | 0.071608 | 0.342181 | 0.454479 |
| SKAP2   | 0.242749 | 0.001095 | 0.003714 |
| SKIL    | 0.10564  | 0.160494 | 0.249459 |
| SKINTL  | 0.026069 | 0.729783 | 0.804388 |
| SKIV2L2 | -0.03856 | 0.609352 | 0.704928 |
| SKIV2L  | 0.169276 | 0.023894 | 0.05164  |
| SKI     | -0.04398 | 0.559995 | 0.660977 |
| SKP1    | 0.007871 | 0.916956 | 0.942259 |
| SKP2    | -0.12619 | 0.093258 | 0.161    |
| SLA2    | -0.184   | 0.013946 | 0.032743 |
| SLAIN1  | -0.21295 | 0.004318 | 0.012068 |
| SLAIN2  | -0.04487 | 0.552033 | 0.654155 |
| SLAMF1  | -0.0242  | 0.748435 | 0.819239 |
| SLAMF6  | 0.021299 | 0.777797 | 0.842333 |
| SLAMF7  | 0.18637  | 0.012744 | 0.030377 |
| SLAMF8  | 0.042544 | 0.572844 | 0.67257  |
| SLAMF9  | 0.401464 | 2.79E-08 | 3.83E-07 |
| SLA     | 0.017916 | 0.81237  | 0.867188 |
| SLBP    | 0.095341 | 0.205538 | 0.30467  |
| SLC10A1 | 0.047326 | 0.530454 | 0.634824 |
| SLC10A2 | -0.00086 | 0.990877 | 0.993313 |
| SLC10A3 | 0.422598 | 4.20E-09 | 7.48E-08 |
| SLC10A4 | -0.14812 | 0.048477 | 0.093529 |
| SLC10A5 | -0.05603 | 0.457589 | 0.568507 |
| SLC10A6 | -0.3361  | 4.50E-06 | 3.25E-05 |
| SLC10A7 | -0.12644 | 0.0926   | 0.160087 |
| SLC11A1 | 0.331961 | 5.99E-06 | 4.18E-05 |
| SLC11A2 | -0.33372 | 5.31E-06 | 3.75E-05 |
| SLC12A1 | -0.39622 | 4.38E-08 | 5.68E-07 |
| SLC12A2 | 0.116024 | 0.12301  | 0.201191 |
| SLC12A3 | -0.06718 | 0.372957 | 0.486114 |
| SLC12A4 | 0.308043 | 2.88E-05 | 0.000163 |
| SLC12A5 | -0.37176 | 3.23E-07 | 3.26E-06 |
| SLC12A6 | 0.072832 | 0.333977 | 0.44622  |
| SLC12A7 | 0.008506 | 0.910276 | 0.937197 |
| SLC12A8 | 0.071163 | 0.345202 | 0.45757  |
| SLC12A9 | 0.302551 | 4.05E-05 | 0.000219 |
| SLC13A1 | -0.17704 | 0.018074 | 0.040734 |
| SLC13A2 | 0.064234 | 0.394305 | 0.507055 |
| SLC13A3 | 0.12736  | 0.090242 | 0.156722 |
| SLC13A4 | 0.19751  | 0.008226 | 0.020919 |
| SLC13A5 | 0.37841  | 1.91E-07 | 2.06E-06 |
| SLC14A1 | 0.095866 | 0.203043 | 0.30171  |
| SLC14A2 | -0.34126 | 3.14E-06 | 2.36E-05 |
| SLC15A1 | 0.364301 | 5.76E-07 | 5.38E-06 |
| SLC15A2 | 0.13887  | 0.064505 | 0.118664 |
| SLC15A3 | 0.262191 | 0.000407 | 0.001594 |
| SLC15A4 | 0.138637 | 0.064959 | 0.119399 |

|           |          |          |          |
|-----------|----------|----------|----------|
| SLC16A10  | -0.11457 | 0.127824 | 0.207622 |
| SLC16A11  | -0.24303 | 0.00108  | 0.00367  |
| SLC16A12  | -0.26702 | 0.000314 | 0.001279 |
| SLC16A13  | 0.016184 | 0.830228 | 0.879698 |
| SLC16A14  | -0.17057 | 0.022821 | 0.049611 |
| SLC16A1   | 0.360832 | 7.50E-07 | 6.79E-06 |
| SLC16A2   | -0.07292 | 0.333397 | 0.44561  |
| SLC16A3   | 0.544282 | 4.08E-15 | 3.24E-13 |
| SLC16A4   | 0.303228 | 3.88E-05 | 0.000211 |
| SLC16A5   | 0.645459 | 2.34E-22 | 1.49E-19 |
| SLC16A6   | -0.18739 | 0.012254 | 0.029375 |
| SLC16A7   | -0.06568 | 0.383717 | 0.49667  |
| SLC16A8   | 0.183547 | 0.014189 | 0.033244 |
| SLC16A9   | -0.07977 | 0.289827 | 0.399327 |
| SLC17A1   | -0.21135 | 0.004627 | 0.012814 |
| SLC17A2   | -0.1902  | 0.010991 | 0.02678  |
| SLC17A3   | -0.18032 | 0.016013 | 0.036827 |
| SLC17A4   | -0.04484 | 0.552304 | 0.65436  |
| SLC17A5   | -0.09234 | 0.220216 | 0.321963 |
| SLC17A6   | 0.000702 | 0.992577 | 0.99464  |
| SLC17A7   | 0.010374 | 0.890683 | 0.923847 |
| SLC17A8   | -0.14158 | 0.059418 | 0.110697 |
| SLC17A9   | 0.373752 | 2.76E-07 | 2.84E-06 |
| SLC18A1   | -0.27425 | 0.000212 | 0.000908 |
| SLC18A2   | -0.21162 | 0.004574 | 0.012688 |
| SLC18A3   | -0.11879 | 0.114263 | 0.190012 |
| SLC19A1   | 0.336173 | 4.48E-06 | 3.24E-05 |
| SLC19A2   | -0.0894  | 0.23535  | 0.339298 |
| SLC19A3   | 0.151984 | 0.042846 | 0.08447  |
| SLC1A1    | 0.233035 | 0.001746 | 0.005549 |
| SLC1A2    | -0.28306 | 0.000129 | 0.000593 |
| SLC1A3    | -0.00972 | 0.897504 | 0.92859  |
| SLC1A4    | -0.46211 | 8.41E-11 | 2.41E-09 |
| SLC1A5    | 0.290092 | 8.57E-05 | 0.000416 |
| SLC1A6    | 0.027194 | 0.718603 | 0.795395 |
| SLC1A7    | 0.001325 | 0.985998 | 0.990154 |
| SLC20A1   | 0.36685  | 4.74E-07 | 4.53E-06 |
| SLC20A2   | 0.176745 | 0.018271 | 0.041113 |
| SLC22A10  | -0.26941 | 0.000276 | 0.001143 |
| SLC22A11  | 0.14757  | 0.049329 | 0.094933 |
| SLC22A12  | -0.12921 | 0.08563  | 0.15031  |
| SLC22A13  | 0.234045 | 0.001665 | 0.005332 |
| SLC22A14  | 0.19298  | 0.009856 | 0.024392 |
| SLC22A15  | -0.01338 | 0.859307 | 0.902003 |
| SLC22A16  | -0.22025 | 0.003136 | 0.00917  |
| SLC22A17  | -0.28101 | 0.000145 | 0.000656 |
| SLC22A18A | 0.442441 | 6.27E-10 | 1.42E-08 |
| SLC22A18  | 0.455807 | 1.62E-10 | 4.33E-09 |
| SLC22A1   | -0.0402  | 0.594216 | 0.691584 |
| SLC22A20  | 0.40147  | 2.79E-08 | 3.83E-07 |
| SLC22A23  | -0.1967  | 0.008499 | 0.021504 |
| SLC22A25  | -0.01827 | 0.808751 | 0.864555 |
| SLC22A2   | -0.05597 | 0.458048 | 0.568839 |
| SLC22A3   | 0.460765 | 9.68E-11 | 2.72E-09 |

|          |          |          |          |
|----------|----------|----------|----------|
| SLC22A4  | -0.17061 | 0.02279  | 0.049565 |
| SLC22A5  | -0.18062 | 0.015834 | 0.036471 |
| SLC22A6  | -0.08486 | 0.260077 | 0.366662 |
| SLC22A7  | -0.12182 | 0.105273 | 0.178103 |
| SLC22A8  | -0.21046 | 0.004805 | 0.013244 |
| SLC22A9  | -0.15023 | 0.045329 | 0.088615 |
| SLC23A1  | 0.13509  | 0.072196 | 0.130578 |
| SLC23A2  | -0.5327  | 1.95E-14 | 1.36E-12 |
| SLC23A3  | 0.496082 | 1.90E-12 | 8.31E-11 |
| SLC24A1  | -0.03197 | 0.671783 | 0.758474 |
| SLC24A2  | 0.057645 | 0.444694 | 0.556266 |
| SLC24A3  | -0.1696  | 0.023626 | 0.051175 |
| SLC24A4  | -0.09398 | 0.21212  | 0.31246  |
| SLC24A5  | -0.13449 | 0.07349  | 0.132409 |
| SLC24A6  | 0.374657 | 2.57E-07 | 2.68E-06 |
| SLC25A10 | 0.28035  | 0.00015  | 0.000678 |
| SLC25A11 | -0.30026 | 4.66E-05 | 0.000247 |
| SLC25A12 | -0.10998 | 0.143901 | 0.228407 |
| SLC25A13 | 0.000304 | 0.996783 | 0.997537 |
| SLC25A14 | -0.27893 | 0.000163 | 0.000726 |
| SLC25A15 | 0.013462 | 0.858444 | 0.901528 |
| SLC25A16 | 0.072661 | 0.335117 | 0.44723  |
| SLC25A17 | -0.15153 | 0.043484 | 0.085566 |
| SLC25A18 | -0.12849 | 0.087407 | 0.152846 |
| SLC25A19 | 0.217944 | 0.003473 | 0.009999 |
| SLC25A1  | 0.219744 | 0.003207 | 0.009349 |
| SLC25A20 | -0.02874 | 0.703321 | 0.783564 |
| SLC25A21 | -0.0712  | 0.344933 | 0.457275 |
| SLC25A22 | -0.04545 | 0.546877 | 0.649448 |
| SLC25A23 | 0.246543 | 0.000908 | 0.003165 |
| SLC25A24 | 0.237513 | 0.001411 | 0.004621 |
| SLC25A25 | -0.03797 | 0.614867 | 0.709978 |
| SLC25A26 | 0.213158 | 0.00428  | 0.011979 |
| SLC25A27 | -0.27507 | 0.000202 | 0.000875 |
| SLC25A28 | 0.08209  | 0.276003 | 0.383938 |
| SLC25A29 | 0.152256 | 0.04247  | 0.083899 |
| SLC25A2  | 0.234055 | 0.001664 | 0.005331 |
| SLC25A30 | -0.05084 | 0.50033  | 0.607486 |
| SLC25A31 | -0.05711 | 0.448928 | 0.559964 |
| SLC25A32 | -0.28065 | 0.000148 | 0.000668 |
| SLC25A33 | -0.28144 | 0.000141 | 0.000643 |
| SLC25A34 | -0.18771 | 0.012105 | 0.029088 |
| SLC25A35 | -0.14376 | 0.055557 | 0.104837 |
| SLC25A36 | -0.06084 | 0.4198   | 0.531987 |
| SLC25A37 | 0.422502 | 4.24E-09 | 7.52E-08 |
| SLC25A38 | -0.16125 | 0.031532 | 0.065283 |
| SLC25A39 | 0.265908 | 0.000334 | 0.001344 |
| SLC25A3  | -0.14184 | 0.058949 | 0.109989 |
| SLC25A40 | -0.18541 | 0.013221 | 0.031335 |
| SLC25A41 | 0.078415 | 0.298146 | 0.408147 |
| SLC25A42 | -0.27482 | 0.000205 | 0.000885 |
| SLC25A43 | 0.248676 | 0.000817 | 0.002895 |
| SLC25A44 | -0.24868 | 0.000817 | 0.002895 |
| SLC25A45 | -0.27726 | 0.000179 | 0.000787 |

SLC25A46 -0.17871 0.016998 0.03871  
SLC25A4 -0.27407 0.000214 0.000915  
SLC25A5 -0.10099 0.179816 0.273115  
SLC25A6 -0.18221 0.014924 0.03469  
SLC26A10 0.073862 0.327169 0.439082  
SLC26A11 -0.46744 4.77E-11 1.47E-09  
SLC26A1 -0.01535 0.838872 0.886246  
SLC26A2 -0.43394 1.44E-09 2.88E-08  
SLC26A3 -0.04755 0.528473 0.633342  
SLC26A4 -0.20897 0.00512 0.013982  
SLC26A5 0.146388 0.051197 0.097937  
SLC26A6 0.162716 0.03 0.062663  
SLC26A7 -0.00971 0.897595 0.92859  
SLC26A8 0.04591 0.542845 0.645901  
SLC26A9 0.372579 3.03E-07 3.09E-06  
SLC27A1 0.301427 4.34E-05 0.000233  
SLC27A2 0.012876 0.864554 0.905973  
SLC27A3 -0.12829 0.0879 0.153518  
SLC27A4 0.102205 0.174609 0.266949  
SLC27A5 -0.15385 0.040328 0.080266  
SLC27A6 -0.06323 0.401728 0.514359  
SLC28A1 -0.13994 0.062445 0.115552  
SLC28A2 0.051469 0.495053 0.603079  
SLC28A3 0.114903 0.126695 0.206152  
SLC29A1 0.09079 0.228108 0.330908  
SLC29A2 0.383354 1.28E-07 1.45E-06  
SLC29A3 0.211478 0.004601 0.012753  
SLC29A4 -0.34653 2.16E-06 1.70E-05  
SLC2A10 0.264378 0.000362 0.001446  
SLC2A11 -0.32451 9.91E-06 6.44E-05  
SLC2A12 -0.14935 0.04662 0.090619  
SLC2A13 -0.34603 2.23E-06 1.75E-05  
SLC2A14 0.013956 0.85331 0.897423  
SLC2A1 0.527351 3.95E-14 2.56E-12  
SLC2A2 -0.04417 0.558248 0.659263  
SLC2A3 0.149011 0.047129 0.091454  
SLC2A4RG 0.267869 0.0003 0.001229  
SLC2A4 -0.16649 0.026343 0.056101  
SLC2A5 0.202989 0.006578 0.017316  
SLC2A6 0.111526 0.138317 0.221356  
SLC2A7 -0.07034 0.350787 0.463451  
SLC2A8 -0.1204 0.109415 0.183759  
SLC2A9 0.053394 0.479034 0.588571  
SLC30A10 0.212359 0.00443 0.012326  
SLC30A1 0.029825 0.692699 0.774741  
SLC30A2 0.037203 0.622 0.715999  
SLC30A3 -0.04292 0.569417 0.66942  
SLC30A4 -0.45765 1.34E-10 3.64E-09  
SLC30A5 -0.25165 0.000703 0.002541  
SLC30A6 -0.0822 0.275336 0.383332  
SLC30A7 0.093993 0.212049 0.312402  
SLC30A8 0.011964 0.874059 0.912834  
SLC30A9 -0.32973 6.97E-06 4.74E-05  
SLC31A1 -0.2925 7.43E-05 0.000367

|          |          |          |          |
|----------|----------|----------|----------|
| SLC31A2  | -0.13654 | 0.069172 | 0.125983 |
| SLC32A1  | -0.28757 | 9.94E-05 | 0.000472 |
| SLC33A1  | -0.24942 | 0.000787 | 0.002808 |
| SLC34A1  | 0.23307  | 0.001743 | 0.005543 |
| SLC34A2  | 0.267129 | 0.000313 | 0.001272 |
| SLC34A3  | 0.034131 | 0.651065 | 0.740064 |
| SLC35A1  | 0.219852 | 0.003191 | 0.009311 |
| SLC35A2  | 0.268906 | 0.000284 | 0.001172 |
| SLC35A3  | 0.247612 | 0.000861 | 0.003024 |
| SLC35A4  | -0.0538  | 0.475681 | 0.585395 |
| SLC35A5  | -0.15765 | 0.035582 | 0.072293 |
| SLC35B1  | -0.1191  | 0.113327 | 0.188805 |
| SLC35B2  | 0.163548 | 0.029158 | 0.061155 |
| SLC35B3  | -0.06912 | 0.359253 | 0.472269 |
| SLC35B4  | -0.27567 | 0.000196 | 0.00085  |
| SLC35C1  | 0.411869 | 1.12E-08 | 1.74E-07 |
| SLC35C2  | 0.187258 | 0.012318 | 0.029502 |
| SLC35D1  | 0.022004 | 0.770645 | 0.836744 |
| SLC35D2  | 0.162316 | 0.030412 | 0.063409 |
| SLC35D3  | -0.08704 | 0.247994 | 0.353276 |
| SLC35E1  | -0.06551 | 0.384939 | 0.49773  |
| SLC35E2  | -0.25103 | 0.000725 | 0.002611 |
| SLC35E3  | -0.24698 | 0.000889 | 0.003108 |
| SLC35E4  | 0.345225 | 2.37E-06 | 1.84E-05 |
| SLC35F1  | -0.23752 | 0.001411 | 0.004621 |
| SLC35F2  | 0.489281 | 4.20E-12 | 1.66E-10 |
| SLC35F3  | -0.22915 | 0.002093 | 0.006488 |
| SLC35F4  | -0.15943 | 0.033531 | 0.068787 |
| SLC35F5  | 0.040452 | 0.59188  | 0.689272 |
| SLC36A1  | 0.082661 | 0.272665 | 0.380707 |
| SLC36A2  | -0.01768 | 0.814836 | 0.869024 |
| SLC36A3  | -0.03941 | 0.601488 | 0.697831 |
| SLC36A4  | -0.44026 | 7.78E-10 | 1.71E-08 |
| SLC37A1  | 0.20082  | 0.007192 | 0.018623 |
| SLC37A2  | 0.170239 | 0.023094 | 0.050132 |
| SLC37A3  | -0.03204 | 0.671121 | 0.758023 |
| SLC37A4  | -0.15871 | 0.034352 | 0.070203 |
| SLC38A10 | -0.09704 | 0.197557 | 0.294807 |
| SLC38A11 | -0.15618 | 0.037359 | 0.075259 |
| SLC38A1  | -0.03865 | 0.60847  | 0.704137 |
| SLC38A2  | -0.17725 | 0.017939 | 0.040507 |
| SLC38A3  | -0.07113 | 0.345455 | 0.457782 |
| SLC38A4  | -0.30672 | 3.12E-05 | 0.000175 |
| SLC38A5  | 0.368845 | 4.06E-07 | 3.98E-06 |
| SLC38A6  | 0.077709 | 0.30253  | 0.412795 |
| SLC38A7  | -0.03495 | 0.643228 | 0.73379  |
| SLC38A8  | -0.18529 | 0.013282 | 0.031453 |
| SLC38A9  | 0.097318 | 0.196251 | 0.293191 |
| SLC39A10 | 0.179886 | 0.016274 | 0.037367 |
| SLC39A11 | 0.387521 | 9.09E-08 | 1.08E-06 |
| SLC39A12 | -0.14915 | 0.046918 | 0.091099 |
| SLC39A13 | 0.213696 | 0.004182 | 0.011759 |
| SLC39A14 | -0.12847 | 0.087452 | 0.152898 |
| SLC39A1  | 0.449844 | 2.99E-10 | 7.43E-09 |

|          |          |          |          |
|----------|----------|----------|----------|
| SLC39A2  | 0.100608 | 0.181478 | 0.275172 |
| SLC39A3  | 0.015404 | 0.838296 | 0.885826 |
| SLC39A4  | 0.50509  | 6.49E-13 | 3.13E-11 |
| SLC39A5  | 0.025851 | 0.73196  | 0.806159 |
| SLC39A6  | -0.44995 | 2.95E-10 | 7.38E-09 |
| SLC39A7  | -0.07893 | 0.294967 | 0.404934 |
| SLC39A8  | -0.23129 | 0.001895 | 0.005957 |
| SLC39A9  | -0.2097  | 0.004965 | 0.013615 |
| SLC3A1   | 0.122555 | 0.103161 | 0.175129 |
| SLC3A2   | -0.10287 | 0.171808 | 0.263523 |
| SLC40A1  | 0.106212 | 0.158229 | 0.246597 |
| SLC41A1  | -0.40629 | 1.83E-08 | 2.66E-07 |
| SLC41A2  | 0.19327  | 0.009744 | 0.024151 |
| SLC41A3  | 0.078698 | 0.2964   | 0.406309 |
| SLC43A1  | -0.21257 | 0.00439  | 0.01223  |
| SLC43A2  | -0.39295 | 5.78E-08 | 7.22E-07 |
| SLC43A3  | 0.087143 | 0.24742  | 0.352585 |
| SLC44A1  | 0.331211 | 6.31E-06 | 4.36E-05 |
| SLC44A2  | 0.587578 | 6.60E-18 | 1.13E-15 |
| SLC44A3  | 0.091515 | 0.224399 | 0.326662 |
| SLC44A4  | 0.427938 | 2.55E-09 | 4.79E-08 |
| SLC44A5  | -0.07742 | 0.304327 | 0.414732 |
| SLC45A1  | -0.20036 | 0.00733  | 0.018946 |
| SLC45A2  | -0.23402 | 0.001667 | 0.005337 |
| SLC45A3  | 0.507994 | 4.56E-13 | 2.32E-11 |
| SLC45A4  | 0.219273 | 0.003274 | 0.009509 |
| SLC46A1  | -0.43694 | 1.08E-09 | 2.25E-08 |
| SLC46A2  | -0.02776 | 0.713023 | 0.79134  |
| SLC46A3  | 0.084805 | 0.260377 | 0.367025 |
| SLC47A1  | 0.10142  | 0.177964 | 0.2708   |
| SLC47A2  | -0.06955 | 0.356266 | 0.469371 |
| SLC48A1  | -0.25845 | 0.000496 | 0.001887 |
| SLC4A10  | -0.21269 | 0.004367 | 0.01218  |
| SLC4A11  | 0.541012 | 6.38E-15 | 4.91E-13 |
| SLC4A1AP | 0.011484 | 0.87908  | 0.916068 |
| SLC4A1   | -0.15258 | 0.042029 | 0.083125 |
| SLC4A2   | 0.053601 | 0.477329 | 0.586912 |
| SLC4A3   | -0.03231 | 0.668511 | 0.755855 |
| SLC4A4   | 0.021129 | 0.779525 | 0.843219 |
| SLC4A5   | -0.07513 | 0.318891 | 0.430603 |
| SLC4A7   | -0.08887 | 0.238163 | 0.342305 |
| SLC4A8   | -0.39861 | 3.57E-08 | 4.72E-07 |
| SLC4A9   | 0.205086 | 0.00603  | 0.016038 |
| SLC5A10  | 0.060818 | 0.419987 | 0.532135 |
| SLC5A11  | -0.03367 | 0.655498 | 0.744547 |
| SLC5A12  | -0.20498 | 0.006058 | 0.016102 |
| SLC5A1   | 0.217046 | 0.003613 | 0.010355 |
| SLC5A2   | 0.247761 | 0.000855 | 0.003004 |
| SLC5A3   | 0.157708 | 0.035515 | 0.072183 |
| SLC5A4   | -0.22728 | 0.002281 | 0.006988 |
| SLC5A5   | 0.1941   | 0.009428 | 0.023481 |
| SLC5A6   | -0.01495 | 0.843006 | 0.889093 |
| SLC5A7   | -0.10977 | 0.144658 | 0.229424 |
| SLC5A8   | -0.18859 | 0.011701 | 0.028228 |



|          |          |          |          |
|----------|----------|----------|----------|
| SLC5A9   | -0.1326  | 0.07766  | 0.138683 |
| SLC6A10P | 0.153037 | 0.041408 | 0.08207  |
| SLC6A11  | 0.039242 | 0.603017 | 0.699195 |
| SLC6A12  | 0.269778 | 0.000271 | 0.001124 |
| SLC6A13  | -0.28143 | 0.000142 | 0.000644 |
| SLC6A14  | 0.51815  | 1.29E-13 | 7.42E-12 |
| SLC6A15  | -0.1074  | 0.15359  | 0.240962 |
| SLC6A16  | -0.25401 | 0.000623 | 0.002288 |
| SLC6A17  | -0.21512 | 0.003931 | 0.011152 |
| SLC6A18  | -0.16817 | 0.02484  | 0.053339 |
| SLC6A19  | 0.001043 | 0.988975 | 0.992085 |
| SLC6A1   | 0.145185 | 0.05316  | 0.101028 |
| SLC6A20  | 0.470692 | 3.36E-11 | 1.07E-09 |
| SLC6A2   | -0.18967 | 0.011222 | 0.027271 |
| SLC6A3   | -0.06835 | 0.364616 | 0.477889 |
| SLC6A4   | -0.27344 | 0.000222 | 0.000944 |
| SLC6A5   | -0.18435 | 0.013767 | 0.0324   |
| SLC6A6   | 0.142124 | 0.058434 | 0.109183 |
| SLC6A7   | 0.167856 | 0.025116 | 0.053849 |
| SLC6A8   | 0.201116 | 0.007105 | 0.018445 |
| SLC6A9   | -0.00166 | 0.982461 | 0.987806 |
| SLC7A10  | -0.28231 | 0.000135 | 0.000616 |
| SLC7A11  | 0.248363 | 0.00083  | 0.00293  |
| SLC7A13  | 0.025845 | 0.732019 | 0.806179 |
| SLC7A14  | -0.27919 | 0.000161 | 0.000718 |
| SLC7A1   | -0.27789 | 0.000173 | 0.000764 |
| SLC7A2   | -0.40259 | 2.53E-08 | 3.53E-07 |
| SLC7A3   | 0.110822 | 0.140841 | 0.224614 |
| SLC7A4   | 0.232004 | 0.001832 | 0.005783 |
| SLC7A5P1 | 0.055105 | 0.465043 | 0.575095 |
| SLC7A5P2 | 0.153793 | 0.040403 | 0.080408 |
| SLC7A5   | 0.001467 | 0.984498 | 0.989251 |
| SLC7A60S | 0.242366 | 0.001116 | 0.003775 |
| SLC7A6   | -0.06792 | 0.367684 | 0.481241 |
| SLC7A7   | 0.369543 | 3.85E-07 | 3.79E-06 |
| SLC7A8   | -0.3299  | 6.89E-06 | 4.69E-05 |
| SLC7A9   | -0.18239 | 0.014819 | 0.03449  |
| SLC8A1   | -0.37994 | 1.69E-07 | 1.85E-06 |
| SLC8A2   | -0.2538  | 0.00063  | 0.00231  |
| SLC8A3   | -0.39618 | 4.40E-08 | 5.68E-07 |
| SLC9A10  | -0.13045 | 0.082627 | 0.146064 |
| SLC9A11  | 0.065809 | 0.382792 | 0.495635 |
| SLC9A1   | 0.408233 | 1.54E-08 | 2.28E-07 |
| SLC9A2   | 0.393528 | 5.50E-08 | 6.92E-07 |
| SLC9A3R1 | 0.167452 | 0.025473 | 0.054472 |
| SLC9A3R2 | 0.283083 | 0.000129 | 0.000593 |
| SLC9A3   | 0.165856 | 0.026928 | 0.057138 |
| SLC9A4   | 0.316994 | 1.62E-05 | 9.88E-05 |
| SLC9A5   | 0.146837 | 0.050481 | 0.096754 |
| SLC9A6   | -0.19783 | 0.008122 | 0.020709 |
| SLC9A7   | -0.16834 | 0.024697 | 0.053088 |
| SLC9A8   | 0.020691 | 0.783977 | 0.846763 |
| SLC9A9   | -0.16843 | 0.024617 | 0.052963 |
| SLC01A2  | -0.03232 | 0.668428 | 0.755804 |

|          |          |          |          |
|----------|----------|----------|----------|
| SLC01B1  | 0.207249 | 0.005507 | 0.014852 |
| SLC01B3  | 0.286822 | 0.000104 | 0.000491 |
| SLC01C1  | -0.1969  | 0.00843  | 0.021354 |
| SLC02A1  | -0.1124  | 0.135221 | 0.217476 |
| SLC02B1  | -0.1321  | 0.078792 | 0.140369 |
| SLC03A1  | 0.208321 | 0.005264 | 0.014303 |
| SLC04A1  | 0.43175  | 1.77E-09 | 3.48E-08 |
| SLC04C1  | -0.12262 | 0.102988 | 0.17485  |
| SLC05A1  | -0.32195 | 1.17E-05 | 7.47E-05 |
| SLC06A1  | -0.04563 | 0.54528  | 0.648057 |
| SLED1    | 0.061943 | 0.411424 | 0.52352  |
| SLFN11   | -0.08766 | 0.244608 | 0.349384 |
| SLFN12L  | -0.08811 | 0.242199 | 0.346695 |
| SLFN12   | 0.275758 | 0.000195 | 0.000847 |
| SLFN13   | 0.389538 | 7.69E-08 | 9.29E-07 |
| SLFN14   | -0.07276 | 0.334477 | 0.446677 |
| SLFN5    | 0.091477 | 0.224593 | 0.326791 |
| SLFNL1   | 0.012392 | 0.869596 | 0.91005  |
| SLIT1    | -0.24839 | 0.000828 | 0.002927 |
| SLIT2    | -0.16431 | 0.028405 | 0.059773 |
| SLIT3    | -0.24467 | 0.000996 | 0.003425 |
| SLITRK1  | -0.27682 | 0.000184 | 0.000804 |
| SLITRK2  | -0.35948 | 8.31E-07 | 7.39E-06 |
| SLITRK3  | 0.081024 | 0.282311 | 0.391    |
| SLITRK4  | 0.011807 | 0.875706 | 0.913929 |
| SLITRK5  | 0.063299 | 0.401238 | 0.513932 |
| SLITRK6  | -0.06326 | 0.401515 | 0.51422  |
| SLK      | 0.316727 | 1.65E-05 | 0.0001   |
| SLMAP    | 0.184661 | 0.013603 | 0.03211  |
| SLM01    | 0.137293 | 0.067628 | 0.123524 |
| SLM02    | 0.123744 | 0.099835 | 0.170376 |
| SLN      | 0.149421 | 0.046517 | 0.090453 |
| SLPI     | 0.62368  | 1.42E-20 | 4.80E-18 |
| SLTM     | -0.10726 | 0.154131 | 0.241638 |
| SLU7     | -0.2088  | 0.005159 | 0.014066 |
| SLURP1   | 0.43749  | 1.02E-09 | 2.15E-08 |
| SMAD1    | -0.26931 | 0.000278 | 0.001148 |
| SMAD2    | -0.28281 | 0.000131 | 0.000601 |
| SMAD3    | 0.506325 | 5.58E-13 | 2.76E-11 |
| SMAD4    | -0.44479 | 4.97E-10 | 1.16E-08 |
| SMAD5OS  | -0.24424 | 0.001018 | 0.003486 |
| SMAD5    | -0.40881 | 1.47E-08 | 2.18E-07 |
| SMAD6    | 0.401292 | 2.84E-08 | 3.87E-07 |
| SMAD7    | -0.11631 | 0.12207  | 0.199951 |
| SMAD9    | -0.35939 | 8.36E-07 | 7.43E-06 |
| SMAGP    | 0.513688 | 2.25E-13 | 1.23E-11 |
| SMAP1    | -0.09172 | 0.223353 | 0.325515 |
| SMAP2    | -0.33485 | 4.91E-06 | 3.50E-05 |
| SMARCA1  | -0.17638 | 0.018516 | 0.04157  |
| SMARCA2  | -0.42753 | 2.65E-09 | 4.96E-08 |
| SMARCA4  | 0.168818 | 0.024282 | 0.052322 |
| SMARCA5  | -0.28221 | 0.000135 | 0.00062  |
| SMARCAD1 | -0.31895 | 1.43E-05 | 8.86E-05 |
| SMARCAL1 | 0.219999 | 0.00317  | 0.009256 |

|         |          |          |          |
|---------|----------|----------|----------|
| SMARCB1 | -0.11958 | 0.111856 | 0.186985 |
| SMARCC1 | -0.04066 | 0.589952 | 0.687878 |
| SMARCC2 | -0.11972 | 0.111437 | 0.186457 |
| SMARCD1 | -0.17917 | 0.016709 | 0.038168 |
| SMARCD2 | 0.120393 | 0.10943  | 0.183768 |
| SMARCD3 | -0.16256 | 0.030157 | 0.062943 |
| SMARCE1 | -0.12475 | 0.097092 | 0.166498 |
| SMC1A   | -0.3358  | 4.60E-06 | 3.30E-05 |
| SMC1B   | -0.1176  | 0.117965 | 0.194777 |
| SMC2    | -0.24334 | 0.001064 | 0.003622 |
| SMC3    | -0.29632 | 5.92E-05 | 0.000303 |
| SMC4    | 0.16201  | 0.03073  | 0.063963 |
| SMC5    | -0.08257 | 0.273188 | 0.38123  |
| SMC6    | 0.048848 | 0.517301 | 0.623234 |
| SMCHD1  | -0.1844  | 0.01374  | 0.032348 |
| SMCP    | -0.12553 | 0.094992 | 0.163508 |
| SMCR5   | -0.2087  | 0.00518  | 0.014113 |
| SMCR7L  | -0.39411 | 5.24E-08 | 6.64E-07 |
| SMCR7   | -0.05063 | 0.502087 | 0.609171 |
| SMCR8   | -0.58136 | 1.76E-17 | 2.64E-15 |
| SMEK1   | -0.15964 | 0.033297 | 0.06841  |
| SMEK2   | -0.05994 | 0.426706 | 0.538805 |
| SMEK3P  | 0.030577 | 0.685349 | 0.76949  |
| SMG1    | -0.01541 | 0.838209 | 0.885817 |
| SMG5    | 0.101788 | 0.176384 | 0.268894 |
| SMG6    | -0.46072 | 9.72E-11 | 2.73E-09 |
| SMG7    | 0.127441 | 0.090033 | 0.15642  |
| SMN1    | -0.07127 | 0.344485 | 0.456773 |
| SMN2    | 0.002612 | 0.972396 | 0.981333 |
| SMNDC1  | 0.187443 | 0.01223  | 0.029332 |
| SMOC1   | -0.28879 | 9.25E-05 | 0.000444 |
| SMOC2   | -0.03953 | 0.600316 | 0.696961 |
| SMOX    | 0.407584 | 1.64E-08 | 2.40E-07 |
| SMO     | 0.149569 | 0.046298 | 0.090099 |
| SMPD1   | -0.27277 | 0.00023  | 0.000975 |
| SMPD2   | -0.04313 | 0.567592 | 0.667512 |
| SMPD3   | 0.233377 | 0.001718 | 0.005478 |
| SMPD4   | 0.120865 | 0.108039 | 0.181895 |
| SMPDL3A | -0.17526 | 0.019285 | 0.043056 |
| SMPDL3B | 0.291251 | 8.01E-05 | 0.000391 |
| SMPX    | 0.320569 | 1.29E-05 | 8.07E-05 |
| SMR3A   | -0.01699 | 0.821932 | 0.873905 |
| SMR3B   | -0.01868 | 0.804531 | 0.861752 |
| SMS     | 0.374655 | 2.57E-07 | 2.68E-06 |
| SMTNL1  | 0.101291 | 0.178519 | 0.271479 |
| SMTNL2  | -0.11885 | 0.114099 | 0.18982  |
| SMTN    | 0.077803 | 0.301943 | 0.412137 |
| SMU1    | -0.24861 | 0.000819 | 0.002902 |
| SMUG1   | 0.288687 | 9.31E-05 | 0.000446 |
| SMURF1  | 0.362075 | 6.83E-07 | 6.25E-06 |
| SMURF2  | 0.004983 | 0.947371 | 0.964392 |
| SMYD1   | -0.05531 | 0.463359 | 0.573622 |
| SMYD2   | 0.053071 | 0.481704 | 0.591078 |
| SMYD3   | 0.270254 | 0.000264 | 0.001099 |

|           |          |          |          |
|-----------|----------|----------|----------|
| SMYD4     | -0.48199 | 9.64E-12 | 3.47E-10 |
| SMYD5     | 0.327557 | 8.08E-06 | 5.38E-05 |
| SNAI1     | -0.00984 | 0.896283 | 0.927782 |
| SNAI2     | 0.239203 | 0.001301 | 0.00431  |
| SNAI3     | -0.06674 | 0.376093 | 0.489042 |
| SNAP23    | 0.30244  | 4.08E-05 | 0.00022  |
| SNAP25    | -0.41763 | 6.63E-09 | 1.11E-07 |
| SNAP29    | -0.02298 | 0.760767 | 0.829295 |
| SNAP47    | -0.12553 | 0.095002 | 0.163509 |
| SNAP91    | -0.31037 | 2.48E-05 | 0.000143 |
| SNAPC1    | 0.032581 | 0.66593  | 0.75341  |
| SNAPC2    | 0.356953 | 1.00E-06 | 8.71E-06 |
| SNAPC3    | -0.08236 | 0.274401 | 0.382491 |
| SNAPC4    | -0.11226 | 0.135734 | 0.218077 |
| SNAPC5    | -0.08646 | 0.251155 | 0.356983 |
| SNAPIN    | 0.318186 | 1.50E-05 | 9.26E-05 |
| SNAR-B2   | -0.10833 | 0.150059 | 0.236369 |
| SNCAIP    | -0.01122 | 0.881868 | 0.917938 |
| SNCA      | -0.46351 | 7.25E-11 | 2.12E-09 |
| SNCB      | -0.17227 | 0.021481 | 0.047108 |
| SNCG      | 0.335261 | 4.77E-06 | 3.42E-05 |
| SND1      | -0.32254 | 1.13E-05 | 7.23E-05 |
| SNED1     | -0.12959 | 0.084695 | 0.148921 |
| SNF8      | 0.159231 | 0.033754 | 0.069165 |
| SNHG10    | 0.010858 | 0.885626 | 0.920444 |
| SNHG11    | 0.132057 | 0.078891 | 0.140502 |
| SNHG12    | 0.316427 | 1.68E-05 | 0.000102 |
| SNHG1     | 0.200462 | 0.007298 | 0.018875 |
| SNHG3-RCC | -0.17818 | 0.017333 | 0.039338 |
| SNHG3     | 0.135283 | 0.071787 | 0.129981 |
| SNHG4     | 0.209016 | 0.005111 | 0.013959 |
| SNHG5     | 0.02243  | 0.766329 | 0.833519 |
| SNHG6     | -0.02488 | 0.741655 | 0.81371  |
| SNHG7     | -0.17896 | 0.016841 | 0.0384   |
| SNHG8     | -0.10406 | 0.166864 | 0.257446 |
| SNHG9     | -0.12775 | 0.089246 | 0.155307 |
| SNIP1     | -0.21931 | 0.003269 | 0.009498 |
| SNN       | -0.2614  | 0.000425 | 0.001651 |
| SNORA10   | -0.06551 | 0.384991 | 0.497765 |
| SNORA11B  | -0.00415 | 0.95616  | 0.969977 |
| SNORA11D  | -0.03773 | 0.617066 | 0.711603 |
| SNORA11E  | -0.18966 | 0.011223 | 0.027271 |
| SNORA11   | -0.04391 | 0.560602 | 0.661535 |
| SNORA12   | -0.25286 | 0.000661 | 0.002404 |
| SNORA13   | -0.08241 | 0.274159 | 0.38226  |
| SNORA14A  | -0.01645 | 0.827508 | 0.877804 |
| SNORA14B  | 0.006601 | 0.930318 | 0.951884 |
| SNORA15   | 0.050984 | 0.499132 | 0.606442 |
| SNORA16A  | -0.00162 | 0.982925 | 0.988122 |
| SNORA16B  | 0.01581  | 0.834093 | 0.882469 |
| SNORA18   | 0.055877 | 0.458804 | 0.569373 |
| SNORA1    | 0.124891 | 0.096709 | 0.165985 |
| SNORA20   | -0.0148  | 0.844558 | 0.890397 |
| SNORA21   | 0.063688 | 0.398348 | 0.511038 |

|          |          |          |          |
|----------|----------|----------|----------|
| SNORA22  | -0.0625  | 0.407226 | 0.51954  |
| SNORA23  | -0.02444 | 0.746063 | 0.817224 |
| SNORA24  | 0.136669 | 0.068897 | 0.125575 |
| SNORA25  | 0.045296 | 0.548256 | 0.650733 |
| SNORA26  | -0.05996 | 0.426591 | 0.538714 |
| SNORA27  | 0.11463  | 0.127608 | 0.207357 |
| SNORA28  | -0.11061 | 0.141588 | 0.225557 |
| SNORA29  | 0.151254 | 0.043865 | 0.086196 |
| SNORA2A  | -0.02553 | 0.735184 | 0.808584 |
| SNORA2B  | -0.14829 | 0.048221 | 0.093136 |
| SNORA31  | 0.222606 | 0.002821 | 0.008386 |
| SNORA32  | 0.107111 | 0.154716 | 0.242401 |
| SNORA34  | -0.00194 | 0.97951  | 0.985791 |
| SNORA36A | -0.02111 | 0.77968  | 0.843309 |
| SNORA36B | 0.087349 | 0.246298 | 0.351247 |
| SNORA37  | 0.020085 | 0.790158 | 0.851616 |
| SNORA38B | 0.021734 | 0.773382 | 0.838838 |
| SNORA38  | -0.05364 | 0.477041 | 0.58663  |
| SNORA39  | 0.057719 | 0.444105 | 0.55577  |
| SNORA3   | 0.03976  | 0.59824  | 0.695041 |
| SNORA40  | 0.023717 | 0.75334  | 0.823287 |
| SNORA41  | 0.090487 | 0.229673 | 0.332861 |
| SNORA42  | 0.00875  | 0.907712 | 0.935677 |
| SNORA44  | 0.050384 | 0.504202 | 0.611174 |
| SNORA45  | 0.183369 | 0.014285 | 0.03344  |
| SNORA46  | 0.009343 | 0.901493 | 0.931111 |
| SNORA47  | -0.04544 | 0.547017 | 0.649535 |
| SNORA48  | -0.06841 | 0.364249 | 0.477503 |
| SNORA49  | 0.047787 | 0.526451 | 0.631754 |
| SNORA4   | -0.03017 | 0.689371 | 0.772504 |
| SNORA50  | 0.012051 | 0.873156 | 0.912327 |
| SNORA52  | 0.054567 | 0.46942  | 0.579493 |
| SNORA53  | -0.07975 | 0.289977 | 0.399443 |
| SNORA54  | -0.02239 | 0.766703 | 0.833743 |
| SNORA55  | -0.0328  | 0.663808 | 0.75202  |
| SNORA56  | 0.022563 | 0.764985 | 0.83247  |
| SNORA57  | 0.131161 | 0.080962 | 0.143621 |
| SNORA59B | 0.042678 | 0.571636 | 0.671511 |
| SNORA5A  | 0.00945  | 0.900371 | 0.930486 |
| SNORA5C  | 0.065198 | 0.387236 | 0.499947 |
| SNORA61  | 0.00517  | 0.945395 | 0.963273 |
| SNORA62  | 0.034415 | 0.64835  | 0.737784 |
| SNORA63  | -0.04142 | 0.583006 | 0.681829 |
| SNORA64  | -0.0013  | 0.986284 | 0.990341 |
| SNORA65  | -0.03144 | 0.676969 | 0.762584 |
| SNORA66  | -0.01198 | 0.873845 | 0.912727 |
| SNORA67  | 0.010908 | 0.885096 | 0.920087 |
| SNORA68  | 0.029149 | 0.699319 | 0.780292 |
| SNORA6   | 0.019502 | 0.796112 | 0.856072 |
| SNORA70  | 0.001629 | 0.982788 | 0.988034 |
| SNORA71A | 0.072232 | 0.337982 | 0.450263 |
| SNORA71B | 0.016174 | 0.830323 | 0.879752 |
| SNORA71C | 0.077902 | 0.301328 | 0.411467 |
| SNORA71D | 0.009344 | 0.901487 | 0.931111 |

|           |          |          |          |
|-----------|----------|----------|----------|
| SNORA72   | 0.069551 | 0.356264 | 0.469371 |
| SNORA74A  | 0.009755 | 0.897177 | 0.928427 |
| SNORA74B  | -0.0783  | 0.298853 | 0.40885  |
| SNORA75   | -0.01873 | 0.804034 | 0.861571 |
| SNORA76   | -0.04201 | 0.577703 | 0.676781 |
| SNORA77   | 0.059593 | 0.429426 | 0.541272 |
| SNORA78   | 0.0163   | 0.829028 | 0.879134 |
| SNORA79   | -0.07523 | 0.31826  | 0.429927 |
| SNORA7B   | -0.00563 | 0.940566 | 0.960034 |
| SNORA80   | -0.00138 | 0.98543  | 0.989849 |
| SNORA81   | 0.204366 | 0.006213 | 0.016476 |
| SNORA84   | 0.061354 | 0.415893 | 0.528259 |
| SNORA8    | 0.330591 | 6.58E-06 | 4.52E-05 |
| SNORA9    | 0.007764 | 0.918074 | 0.943162 |
| SNORD10   | -0.04859 | 0.519513 | 0.625135 |
| SNORD115- | -0.22558 | 0.002466 | 0.00747  |
| SNORD115- | -0.34404 | 2.58E-06 | 1.98E-05 |
| SNORD116- | -0.33783 | 3.99E-06 | 2.91E-05 |
| SNORD116- | -0.21982 | 0.003196 | 0.009322 |
| SNORD116- | -0.24667 | 0.000903 | 0.003147 |
| SNORD15A  | 0.102862 | 0.171843 | 0.263535 |
| SNORD15B  | 0.031915 | 0.67236  | 0.758818 |
| SNORD17   | 0.052368 | 0.487539 | 0.596314 |
| SNORD1C   | -0.02138 | 0.777011 | 0.841666 |
| SNORD22   | 0.028688 | 0.703849 | 0.784031 |
| SNORD89   | 0.078399 | 0.298241 | 0.408211 |
| SNORD94   | 0.044919 | 0.551598 | 0.653825 |
| SNORD97   | 0.049669 | 0.510279 | 0.616763 |
| SNPH      | -0.3683  | 4.24E-07 | 4.11E-06 |
| SNRK      | -0.11095 | 0.140391 | 0.224077 |
| SNRNP200  | -0.21051 | 0.004796 | 0.013225 |
| SNRNP25   | -0.1592  | 0.033788 | 0.069204 |
| SNRNP27   | 0.023766 | 0.752844 | 0.822836 |
| SNRNP35   | -0.06728 | 0.372207 | 0.485279 |
| SNRNP40   | -0.15619 | 0.037341 | 0.07523  |
| SNRNP48   | -0.20878 | 0.005162 | 0.01407  |
| SNRNP70   | 0.136523 | 0.069197 | 0.125998 |
| SNRPA1    | 0.195143 | 0.009045 | 0.022635 |
| SNRPA     | 0.364098 | 5.85E-07 | 5.45E-06 |
| SNRPB2    | 0.069418 | 0.357188 | 0.470368 |
| SNRPB     | 0.221066 | 0.003023 | 0.008906 |
| SNRPC     | 0.142532 | 0.057707 | 0.108119 |
| SNRPD1    | 0.231672 | 0.001861 | 0.005864 |
| SNRPD2    | 0.242709 | 0.001097 | 0.00372  |
| SNRPD3    | 0.189622 | 0.011242 | 0.027309 |
| SNRPE     | 0.210528 | 0.004792 | 0.013218 |
| SNRPF     | 0.057576 | 0.445239 | 0.556626 |
| SNRPG     | 0.315334 | 1.81E-05 | 0.000109 |
| SNRPN     | -0.20246 | 0.006724 | 0.017648 |
| SNTA1     | -0.14507 | 0.053358 | 0.101336 |
| SNTB1     | 0.132408 | 0.078091 | 0.139354 |
| SNTB2     | 0.061797 | 0.412532 | 0.524491 |
| SNTG1     | -0.35694 | 1.01E-06 | 8.71E-06 |
| SNTG2     | -0.34189 | 3.00E-06 | 2.27E-05 |

|        |          |          |          |
|--------|----------|----------|----------|
| SNTN   | 0.258131 | 0.000504 | 0.001915 |
| SNUPN  | 0.12705  | 0.091033 | 0.157874 |
| SNURF  | -0.13494 | 0.072518 | 0.131005 |
| SNW1   | -0.01131 | 0.880906 | 0.917438 |
| SNX10  | -0.10899 | 0.147568 | 0.23318  |
| SNX11  | 0.012348 | 0.870055 | 0.910333 |
| SNX12  | -0.04958 | 0.511028 | 0.617323 |
| SNX13  | -0.41222 | 1.08E-08 | 1.69E-07 |
| SNX14  | -0.20087 | 0.007178 | 0.018599 |
| SNX15  | 0.206329 | 0.005724 | 0.015365 |
| SNX16  | -0.19845 | 0.00792  | 0.020263 |
| SNX17  | 0.038095 | 0.613661 | 0.708958 |
| SNX18  | -0.16785 | 0.02512  | 0.053849 |
| SNX19  | -0.14718 | 0.049932 | 0.09587  |
| SNX1   | -0.08833 | 0.241013 | 0.345398 |
| SNX20  | 0.009167 | 0.903343 | 0.932486 |
| SNX21  | 0.29194  | 7.69E-05 | 0.000378 |
| SNX22  | -0.19376 | 0.009555 | 0.023749 |
| SNX24  | 0.111371 | 0.13887  | 0.22208  |
| SNX25  | -0.41867 | 6.03E-09 | 1.02E-07 |
| SNX27  | 0.073948 | 0.3266   | 0.438646 |
| SNX29  | -0.30449 | 3.59E-05 | 0.000196 |
| SNX2   | -0.16221 | 0.030523 | 0.063581 |
| SNX30  | -0.44826 | 3.51E-10 | 8.55E-09 |
| SNX31  | -0.01861 | 0.805231 | 0.862035 |
| SNX32  | -0.10731 | 0.153932 | 0.241384 |
| SNX33  | 0.398895 | 3.49E-08 | 4.63E-07 |
| SNX3   | -0.1443  | 0.054642 | 0.103416 |
| SNX4   | -0.21601 | 0.003782 | 0.010784 |
| SNX5   | 0.080069 | 0.288041 | 0.39733  |
| SNX6   | 0.164438 | 0.02828  | 0.059567 |
| SNX7   | 0.407959 | 1.58E-08 | 2.33E-07 |
| SNX8   | 0.236567 | 0.001477 | 0.004805 |
| SNX9   | 0.062054 | 0.410587 | 0.522657 |
| SOAT1  | -0.33155 | 6.16E-06 | 4.28E-05 |
| SOAT2  | -0.03658 | 0.627859 | 0.720864 |
| SOBP   | -0.35    | 1.68E-06 | 1.36E-05 |
| SOCS1  | -0.01992 | 0.791884 | 0.852779 |
| SOCS2  | -0.44864 | 3.38E-10 | 8.28E-09 |
| SOCS3  | 0.098661 | 0.190117 | 0.285688 |
| SOCS4  | -0.18603 | 0.012913 | 0.030696 |
| SOCS5  | -0.10647 | 0.157224 | 0.245534 |
| SOCS6  | -0.12108 | 0.107395 | 0.181027 |
| SOCS7  | -0.41427 | 9.00E-09 | 1.45E-07 |
| SOD1   | 0.207578 | 0.005431 | 0.014678 |
| SOD2   | -0.11387 | 0.130175 | 0.210732 |
| SOD3   | -0.16039 | 0.032462 | 0.066942 |
| SOHLH1 | -0.1173  | 0.118925 | 0.19605  |
| SOHLH2 | 0.094128 | 0.211392 | 0.311606 |
| SOLH   | 0.137102 | 0.068014 | 0.124184 |
| SON    | -0.25497 | 0.000593 | 0.002198 |
| SORBS1 | -0.25519 | 0.000587 | 0.002179 |
| SORBS2 | -0.20174 | 0.006925 | 0.018085 |
| SORBS3 | 0.108423 | 0.149697 | 0.235997 |

|         |          |          |          |
|---------|----------|----------|----------|
| SORCS1  | -0.30985 | 2.57E-05 | 0.000147 |
| SORCS2  | 0.05017  | 0.506015 | 0.612897 |
| SORCS3  | -0.11211 | 0.136235 | 0.218705 |
| SORD    | 0.344453 | 2.50E-06 | 1.93E-05 |
| SORL1   | -0.13473 | 0.07297  | 0.13164  |
| SORT1   | -0.0929  | 0.217431 | 0.318763 |
| SOS1    | -0.16422 | 0.028498 | 0.059929 |
| SOS2    | -0.36217 | 6.78E-07 | 6.21E-06 |
| SOSTDC1 | 0.124733 | 0.097134 | 0.166557 |
| SOST    | 0.053004 | 0.482258 | 0.591574 |
| SOX10   | 0.048664 | 0.518881 | 0.624612 |
| SOX11   | 0.321879 | 1.18E-05 | 7.50E-05 |
| SOX12   | -0.27865 | 0.000166 | 0.000736 |
| SOX13   | 0.127259 | 0.090499 | 0.157086 |
| SOX14   | 0.014943 | 0.843067 | 0.889109 |
| SOX15   | 0.048049 | 0.524182 | 0.629567 |
| SOX17   | -0.13617 | 0.069917 | 0.127142 |
| SOX18   | -0.04661 | 0.53667  | 0.640132 |
| SOX1    | -0.11614 | 0.12264  | 0.200686 |
| SOX21   | 0.530156 | 2.73E-14 | 1.85E-12 |
| SOX20T  | -0.23011 | 0.002002 | 0.006235 |
| SOX2    | -0.0828  | 0.271842 | 0.379806 |
| SOX30   | -0.10347 | 0.169328 | 0.260526 |
| SOX3    | -0.12375 | 0.099816 | 0.170358 |
| SOX4    | 0.253958 | 0.000625 | 0.002294 |
| SOX5    | -0.37932 | 1.77E-07 | 1.93E-06 |
| SOX6    | -0.12393 | 0.099319 | 0.169582 |
| SOX7    | 0.223057 | 0.002764 | 0.00824  |
| SOX8    | 0.08343  | 0.268215 | 0.375828 |
| SOX9    | 0.325251 | 9.43E-06 | 6.17E-05 |
| SP100   | 0.445856 | 4.47E-10 | 1.05E-08 |
| SP110   | 0.375499 | 2.41E-07 | 2.52E-06 |
| SP140L  | 0.296216 | 5.95E-05 | 0.000304 |
| SP140   | 0.057328 | 0.447203 | 0.558411 |
| SP1     | 0.257651 | 0.000516 | 0.001954 |
| SP2     | -0.24673 | 0.0009   | 0.003139 |
| SP3     | 0.03671  | 0.626626 | 0.719958 |
| SP4     | -0.488   | 4.87E-12 | 1.89E-10 |
| SP5     | -0.01445 | 0.848203 | 0.89324  |
| SP6     | 0.424002 | 3.69E-09 | 6.66E-08 |
| SP7     | -0.0321  | 0.670597 | 0.757693 |
| SP8     | -0.19596 | 0.008755 | 0.022035 |
| SP9     | -0.05581 | 0.459311 | 0.569895 |
| SPA17   | 0.002789 | 0.970526 | 0.980042 |
| SPACA3  | -0.03746 | 0.619601 | 0.713911 |
| SPACA4  | 0.365873 | 5.11E-07 | 4.84E-06 |
| SPACA5  | -0.01282 | 0.865145 | 0.906447 |
| SPAG11B | 0.031546 | 0.675932 | 0.761892 |
| SPAG16  | 0.183378 | 0.01428  | 0.033432 |
| SPAG17  | 0.363648 | 6.06E-07 | 5.62E-06 |
| SPAG1   | 0.089913 | 0.232651 | 0.336388 |
| SPAG4   | 0.27804  | 0.000171 | 0.000759 |
| SPAG5   | 0.320067 | 1.33E-05 | 8.31E-05 |
| SPAG6   | -0.38821 | 8.58E-08 | 1.02E-06 |



|          |          |          |          |
|----------|----------|----------|----------|
| SPAG7    | -0.04423 | 0.557713 | 0.658991 |
| SPAG8    | -0.20368 | 0.006393 | 0.016877 |
| SPAG9    | -0.09771 | 0.19445  | 0.291049 |
| SPAM1    | -0.07146 | 0.343189 | 0.455481 |
| SPANXA2  | -0.05264 | 0.485263 | 0.594227 |
| SPANXB2  | 0.021372 | 0.777056 | 0.841669 |
| SPANXC   | 0.003204 | 0.966147 | 0.977067 |
| SPANXE   | -0.04439 | 0.556294 | 0.65769  |
| SPANXN3  | 0.025007 | 0.740392 | 0.812847 |
| SPANXN5  | -0.09183 | 0.222784 | 0.324805 |
| SPARCL1  | -0.10946 | 0.145835 | 0.231014 |
| SPARC    | 0.114717 | 0.127316 | 0.206972 |
| SPAST    | -0.18035 | 0.015995 | 0.036793 |
| SPATA12  | 0.344383 | 2.51E-06 | 1.94E-05 |
| SPATA13  | -0.18926 | 0.011402 | 0.027626 |
| SPATA16  | -0.12095 | 0.107777 | 0.181563 |
| SPATA17  | -0.10198 | 0.175576 | 0.267952 |
| SPATA18  | -0.11107 | 0.139963 | 0.223471 |
| SPATA19  | 0.076105 | 0.312647 | 0.423618 |
| SPATA1   | -0.20375 | 0.006375 | 0.016838 |
| SPATA20  | 0.163015 | 0.029695 | 0.062143 |
| SPATA21  | -0.01982 | 0.792905 | 0.853367 |
| SPATA22  | -0.13692 | 0.068386 | 0.124771 |
| SPATA24  | -0.14459 | 0.05416  | 0.102661 |
| SPATA2L  | 0.136235 | 0.069793 | 0.126939 |
| SPATA2   | -0.17603 | 0.018753 | 0.042044 |
| SPATA3   | -0.12749 | 0.089915 | 0.156301 |
| SPATA4   | -0.32649 | 8.68E-06 | 5.73E-05 |
| SPATA5L1 | 0.123763 | 0.099783 | 0.170316 |
| SPATA5   | 0.012909 | 0.864204 | 0.90591  |
| SPATA6   | -0.09479 | 0.208173 | 0.307745 |
| SPATA7   | -0.38462 | 1.15E-07 | 1.32E-06 |
| SPATA8   | -0.05334 | 0.47948  | 0.589006 |
| SPATA9   | -0.10496 | 0.163211 | 0.252926 |
| SPATC1   | 0.002274 | 0.975962 | 0.983522 |
| SPATS1   | -0.09409 | 0.211574 | 0.311818 |
| SPATS2L  | 0.523426 | 6.56E-14 | 4.04E-12 |
| SPATS2   | -0.28703 | 0.000103 | 0.000486 |
| SPC24    | 0.394586 | 5.03E-08 | 6.42E-07 |
| SPC25    | 0.122202 | 0.104166 | 0.176593 |
| SPCS1    | 0.009285 | 0.902103 | 0.931498 |
| SPCS2    | -0.05968 | 0.428717 | 0.540688 |
| SPCS3    | -0.16088 | 0.031928 | 0.065964 |
| SPDEF    | 0.479646 | 1.25E-11 | 4.35E-10 |
| SPDYA    | 0.166728 | 0.026125 | 0.055698 |
| SPDYC    | 0.103971 | 0.167242 | 0.25798  |
| SPDYE1   | -0.089   | 0.237467 | 0.341421 |
| SPDYE2   | -0.07013 | 0.352295 | 0.465038 |
| SPDYE3   | 0.051502 | 0.494771 | 0.602884 |
| SPDYE4   | 0.009359 | 0.901322 | 0.931092 |
| SPDYE5   | -0.14343 | 0.056132 | 0.105781 |
| SPDYE6   | -0.03358 | 0.656285 | 0.745149 |
| SPDYE7P  | 0.029505 | 0.695824 | 0.777401 |
| SPDYE8P  | 0.100554 | 0.181716 | 0.27543  |

|         |          |          |          |
|---------|----------|----------|----------|
| SPEF1   | -0.15961 | 0.033325 | 0.068438 |
| SPEF2   | -0.30944 | 2.63E-05 | 0.00015  |
| SPEG    | -0.05992 | 0.426928 | 0.539051 |
| SPEM1   | -0.10207 | 0.175185 | 0.26754  |
| SPEN    | -0.20123 | 0.007073 | 0.01839  |
| SPERT   | 0.08681  | 0.249234 | 0.354736 |
| SPESP1  | -0.08401 | 0.264889 | 0.37225  |
| SPG11   | 0.084503 | 0.262088 | 0.368994 |
| SPG20   | -0.05004 | 0.507125 | 0.613927 |
| SPG21   | 0.283114 | 0.000129 | 0.000592 |
| SPG7    | 0.2438   | 0.00104  | 0.00355  |
| SPHAR   | 0.020703 | 0.783858 | 0.846717 |
| SPHK1   | 0.255896 | 0.000566 | 0.002112 |
| SPHK2   | 0.081446 | 0.279804 | 0.388188 |
| SPHKAP  | -0.01681 | 0.823743 | 0.875114 |
| SPI1    | 0.140233 | 0.061902 | 0.114632 |
| SPIB    | 0.096537 | 0.199883 | 0.297605 |
| SPIC    | -0.0744  | 0.323632 | 0.435607 |
| SPIN1   | -0.17524 | 0.019302 | 0.043089 |
| SPIN2A  | 0.209363 | 0.005036 | 0.013779 |
| SPIN2B  | 0.051714 | 0.492995 | 0.601386 |
| SPIN3   | -0.12845 | 0.087504 | 0.152934 |
| SPIN4   | 0.160216 | 0.032655 | 0.06724  |
| SPINK13 | 0.297085 | 5.65E-05 | 0.00029  |
| SPINK14 | -0.14345 | 0.056107 | 0.105753 |
| SPINK1  | 0.045377 | 0.547542 | 0.650065 |
| SPINK2  | -0.23398 | 0.00167  | 0.005345 |
| SPINK4  | 0.022593 | 0.764681 | 0.83223  |
| SPINK5  | 0.408616 | 1.49E-08 | 2.21E-07 |
| SPINK6  | 0.022193 | 0.768727 | 0.835209 |
| SPINK7  | 0.358883 | 8.69E-07 | 7.68E-06 |
| SPINK8  | -0.02631 | 0.727367 | 0.802621 |
| SPINK9  | -0.18002 | 0.016192 | 0.037197 |
| SPINLW1 | 0.212387 | 0.004425 | 0.012316 |
| SPINT1  | 0.441487 | 6.89E-10 | 1.53E-08 |
| SPINT2  | 0.257369 | 0.000524 | 0.001978 |
| SPINT3  | 0.117769 | 0.117437 | 0.194018 |
| SPINT4  | 0.042303 | 0.57502  | 0.674484 |
| SPIRE1  | -0.20807 | 0.00532  | 0.014438 |
| SPIRE2  | 0.243829 | 0.001039 | 0.003545 |
| SPNS1   | 0.152794 | 0.041737 | 0.082613 |
| SPNS2   | 0.164977 | 0.02776  | 0.058608 |
| SPNS3   | 0.217981 | 0.003467 | 0.009989 |
| SPN     | 0.037157 | 0.622427 | 0.716406 |
| SPO11   | 0.102277 | 0.174305 | 0.266649 |
| SPOCD1  | 0.422281 | 4.33E-09 | 7.63E-08 |
| SPOCK1  | 0.119553 | 0.111948 | 0.187107 |
| SPOCK2  | -0.33121 | 6.31E-06 | 4.36E-05 |
| SPOCK3  | -0.21156 | 0.004584 | 0.012715 |
| SPON1   | 0.029848 | 0.692468 | 0.774673 |
| SPON2   | 0.236454 | 0.001485 | 0.004826 |
| SPOPL   | -0.02922 | 0.698648 | 0.779807 |
| SPOP    | -0.34748 | 2.01E-06 | 1.60E-05 |
| SPP1    | 0.233301 | 0.001724 | 0.005492 |

|         |          |          |          |
|---------|----------|----------|----------|
| SPP2    | 0.004802 | 0.949275 | 0.965684 |
| SPPL2A  | 0.119385 | 0.112455 | 0.18778  |
| SPPL2B  | 0.033584 | 0.656291 | 0.745149 |
| SPPL3   | -0.14634 | 0.05127  | 0.098038 |
| SPRED1  | 0.129982 | 0.083755 | 0.147608 |
| SPRED2  | 0.023652 | 0.753991 | 0.82377  |
| SPRED3  | -0.09215 | 0.221167 | 0.323043 |
| SPRN    | -0.12079 | 0.108259 | 0.182157 |
| SPRR1A  | 0.498087 | 1.50E-12 | 6.72E-11 |
| SPRR1B  | 0.567126 | 1.54E-16 | 1.81E-14 |
| SPRR2A  | 0.224265 | 0.002617 | 0.00786  |
| SPRR2B  | 0.046336 | 0.539103 | 0.642337 |
| SPRR2C  | 0.148739 | 0.047537 | 0.092129 |
| SPRR2D  | 0.246514 | 0.00091  | 0.003168 |
| SPRR2E  | 0.187075 | 0.012404 | 0.029681 |
| SPRR2F  | 0.044587 | 0.554538 | 0.65622  |
| SPRR2G  | 0.062635 | 0.406206 | 0.518582 |
| SPRR3   | 0.550049 | 1.83E-15 | 1.55E-13 |
| SPRR4   | 0.203711 | 0.006384 | 0.016857 |
| SPRY1   | -0.2397  | 0.00127  | 0.004223 |
| SPRY2   | 0.07873  | 0.2962   | 0.406232 |
| SPRY3   | -0.18954 | 0.011276 | 0.027372 |
| SPRY4   | 0.047536 | 0.528631 | 0.633453 |
| SPRYD3  | -0.36548 | 5.27E-07 | 4.98E-06 |
| SPRYD4  | -0.16955 | 0.02366  | 0.051231 |
| SPRYD5  | -0.13165 | 0.079837 | 0.141969 |
| SPR     | 0.205595 | 0.005903 | 0.015763 |
| SPSB1   | 0.205718 | 0.005873 | 0.015692 |
| SPSB2   | 0.167899 | 0.025078 | 0.053778 |
| SPSB3   | 0.211865 | 0.004525 | 0.012571 |
| SPSB4   | 0.05478  | 0.467683 | 0.577781 |
| SPTA1   | -0.24401 | 0.001029 | 0.003519 |
| SPTAN1  | 0.251544 | 0.000707 | 0.002553 |
| SPTBN1  | 0.230842 | 0.001935 | 0.006061 |
| SPTBN2  | 0.367216 | 4.61E-07 | 4.43E-06 |
| SPTBN4  | -0.30002 | 4.73E-05 | 0.00025  |
| SPTBN5  | 0.316821 | 1.64E-05 | 9.97E-05 |
| SPTB    | -0.4012  | 2.86E-08 | 3.90E-07 |
| SPTLC1  | 0.051384 | 0.495764 | 0.603561 |
| SPTLC2  | 0.125051 | 0.096278 | 0.165361 |
| SPTLC3  | 0.29489  | 6.45E-05 | 0.000325 |
| SPTY2D1 | 0.045692 | 0.544763 | 0.64756  |
| SPZ1    | 0.022499 | 0.765627 | 0.833031 |
| SQLE    | 0.256484 | 0.000549 | 0.002059 |
| SQRDL   | 0.403677 | 2.31E-08 | 3.26E-07 |
| SQSTM1  | 0.230328 | 0.001981 | 0.006187 |
| SR140   | 0.063112 | 0.402633 | 0.515324 |
| SRA1    | 0.219165 | 0.00329  | 0.009545 |
| SRBD1   | -0.42643 | 2.94E-09 | 5.44E-08 |
| SRCAP   | 0.239718 | 0.001269 | 0.004221 |
| SRCIN1  | -0.30222 | 4.13E-05 | 0.000223 |
| SRCRB4D | 0.043688 | 0.562561 | 0.663332 |
| SRC     | 0.396611 | 4.24E-08 | 5.50E-07 |
| SRD5A1  | 0.120085 | 0.11035  | 0.18503  |

|        |          |          |          |
|--------|----------|----------|----------|
| SRD5A2 | 0.0788   | 0.295771 | 0.405757 |
| SRD5A3 | 0.477972 | 1.51E-11 | 5.16E-10 |
| SREBF1 | 0.012542 | 0.86803  | 0.908892 |
| SREBF2 | -0.02037 | 0.787252 | 0.849224 |
| SRFBP1 | 0.00737  | 0.922216 | 0.946042 |
| SRF    | -0.1876  | 0.012155 | 0.029177 |
| SRGAP1 | -0.08958 | 0.234376 | 0.338387 |
| SRGAP2 | 0.292832 | 7.29E-05 | 0.000361 |
| SRGAP3 | -0.37539 | 2.43E-07 | 2.54E-06 |
| SRGN   | -0.03208 | 0.670797 | 0.757817 |
| SRI    | 0.418369 | 6.20E-09 | 1.05E-07 |
| SRL    | 0.082553 | 0.273292 | 0.381348 |
| SRMS   | 0.243218 | 0.00107  | 0.003638 |
| SRM    | 0.006377 | 0.932671 | 0.9537   |
| SRP14  | 0.108788 | 0.148322 | 0.234146 |
| SRP19  | -0.11574 | 0.123952 | 0.202464 |
| SRP54  | -0.26096 | 0.000434 | 0.001687 |
| SRP68  | -0.1246  | 0.097498 | 0.167093 |
| SRP72  | -0.24297 | 0.001084 | 0.00368  |
| SRP9   | 0.011599 | 0.877875 | 0.915268 |
| SRPK1  | 0.269716 | 0.000272 | 0.001126 |
| SRPK2  | -0.34809 | 1.93E-06 | 1.53E-05 |
| SRPK3  | 0.118761 | 0.114359 | 0.190141 |
| SRPRB  | -0.17213 | 0.021591 | 0.047302 |
| SRPR   | -0.33059 | 6.58E-06 | 4.52E-05 |
| SRPX2  | 0.269418 | 0.000276 | 0.001143 |
| SRPX   | -0.11972 | 0.111455 | 0.186472 |
| SRRD   | 0.128026 | 0.088556 | 0.154377 |
| SRRM1  | 0.082141 | 0.275706 | 0.383634 |
| SRRM2  | 0.002202 | 0.976726 | 0.983991 |
| SRRM3  | -0.19418 | 0.0094   | 0.023419 |
| SRRM4  | -0.33082 | 6.48E-06 | 4.46E-05 |
| SRRM5  | 0.223487 | 0.002711 | 0.008104 |
| SRRT   | 0.103119 | 0.170769 | 0.262269 |
| SRR    | -0.40967 | 1.36E-08 | 2.05E-07 |
| SRXN1  | -0.07459 | 0.322433 | 0.434318 |
| SRY    | -0.18908 | 0.011482 | 0.027791 |
| SS18L1 | -0.22151 | 0.002964 | 0.008758 |
| SS18L2 | 0.147966 | 0.048716 | 0.093918 |
| SS18   | -0.2076  | 0.005427 | 0.014667 |
| SSBP1  | 0.267714 | 0.000303 | 0.001237 |
| SSBP2  | -0.25617 | 0.000558 | 0.002086 |
| SSBP3  | -0.00551 | 0.941793 | 0.960908 |
| SSBP4  | -0.02476 | 0.742864 | 0.814764 |
| SSB    | 0.177777 | 0.017593 | 0.03984  |
| SSC5D  | 0.113476 | 0.131511 | 0.212529 |
| SSFA2  | 0.148698 | 0.0476   | 0.092206 |
| SSH1   | -0.23096 | 0.001924 | 0.006033 |
| SSH2   | -0.30058 | 4.57E-05 | 0.000243 |
| SSH3   | 0.625145 | 1.09E-20 | 3.85E-18 |
| SSNA1  | 0.185362 | 0.013245 | 0.031373 |
| SSPN   | 0.056632 | 0.452746 | 0.563659 |
| SSPO   | -0.22731 | 0.002278 | 0.006981 |
| SSR1   | -0.4216  | 4.61E-09 | 8.07E-08 |

|           |          |          |          |
|-----------|----------|----------|----------|
| SSR2      | 0.067636 | 0.369691 | 0.483036 |
| SSR3      | -0.09361 | 0.213934 | 0.314639 |
| SSR4      | -0.26303 | 0.000389 | 0.001535 |
| SSRP1     | 0.192691 | 0.009969 | 0.024638 |
| SSSCA1    | 0.296263 | 5.94E-05 | 0.000303 |
| SSTR1     | -0.21302 | 0.004306 | 0.012041 |
| SSTR2     | -0.45587 | 1.61E-10 | 4.31E-09 |
| SSTR3     | -0.25015 | 0.000758 | 0.002716 |
| SSTR4     | -0.15336 | 0.040981 | 0.081362 |
| SSTR5     | -0.1592  | 0.03379  | 0.069204 |
| SST       | 0.023487 | 0.755652 | 0.825073 |
| SSU72     | 0.095668 | 0.203978 | 0.302832 |
| SSX1      | 0.010012 | 0.894482 | 0.926369 |
| SSX2IP    | -0.39798 | 3.77E-08 | 4.95E-07 |
| SSX2      | -0.00592 | 0.937444 | 0.957589 |
| SSX3      | 0.04735  | 0.530247 | 0.634691 |
| SSX4      | -0.10422 | 0.166216 | 0.256678 |
| SSX5      | -0.15605 | 0.037524 | 0.075499 |
| SSX6      | -0.13857 | 0.065085 | 0.119608 |
| SSX8      | -0.01875 | 0.803764 | 0.861571 |
| ST13      | -0.33932 | 3.60E-06 | 2.66E-05 |
| ST14      | 0.490941 | 3.47E-12 | 1.41E-10 |
| ST18      | -0.3505  | 1.62E-06 | 1.32E-05 |
| ST20      | 0.03377  | 0.654517 | 0.743586 |
| ST3GAL1   | 0.316186 | 1.71E-05 | 0.000103 |
| ST3GAL2   | -0.17726 | 0.01793  | 0.040497 |
| ST3GAL3   | -0.2673  | 0.00031  | 0.001262 |
| ST3GAL4   | 0.185178 | 0.013338 | 0.03156  |
| ST3GAL5   | 0.00179  | 0.981077 | 0.986867 |
| ST3GAL6   | 0.010532 | 0.889036 | 0.923018 |
| ST5       | 0.21563  | 0.003844 | 0.010939 |
| ST6GAL1   | 0.053135 | 0.481179 | 0.590533 |
| ST6GAL2   | 0.170988 | 0.022488 | 0.048995 |
| ST6GALNAC | 0.492466 | 2.91E-12 | 1.20E-10 |
| ST6GALNAC | 0.212283 | 0.004445 | 0.012365 |
| ST6GALNAC | -0.35835 | 9.04E-07 | 7.94E-06 |
| ST6GALNAC | -0.26047 | 0.000446 | 0.001722 |
| ST6GALNAC | -0.35885 | 8.71E-07 | 7.70E-06 |
| ST6GALNAC | -0.40308 | 2.43E-08 | 3.41E-07 |
| ST7L      | -0.21938 | 0.003259 | 0.009477 |
| ST7OT1    | -0.16194 | 0.030807 | 0.064044 |
| ST7OT2    | -0.0651  | 0.387928 | 0.500596 |
| ST7OT3    | -0.09897 | 0.188729 | 0.283992 |
| ST7OT4    | -0.11565 | 0.124237 | 0.202912 |
| ST7       | -0.25828 | 0.0005   | 0.001902 |
| ST8SIA1   | -0.23155 | 0.001872 | 0.005892 |
| ST8SIA2   | 0.333077 | 5.55E-06 | 3.90E-05 |
| ST8SIA3   | -0.13209 | 0.07882  | 0.140401 |
| ST8SIA4   | -0.1455  | 0.052645 | 0.100242 |
| ST8SIA5   | -0.23491 | 0.001598 | 0.005147 |
| ST8SIA6   | -0.22472 | 0.002564 | 0.007722 |
| STAB1     | -0.129   | 0.086138 | 0.150988 |
| STAB2     | -0.23918 | 0.001302 | 0.004312 |
| STAC2     | 0.188674 | 0.011663 | 0.028152 |

|          |          |          |          |
|----------|----------|----------|----------|
| STAC3    | 0.165849 | 0.026935 | 0.057141 |
| STAC     | 0.206155 | 0.005766 | 0.015458 |
| STAG1    | -0.21168 | 0.004561 | 0.012661 |
| STAG2    | -0.34177 | 3.03E-06 | 2.29E-05 |
| STAG3L1  | -0.01178 | 0.87598  | 0.914119 |
| STAG3L2  | -0.07998 | 0.288597 | 0.39793  |
| STAG3L3  | 0.029439 | 0.696478 | 0.777956 |
| STAG3L4  | -0.17333 | 0.02068  | 0.045665 |
| STAG3    | -0.13723 | 0.067749 | 0.123722 |
| STAM2    | -0.09391 | 0.21246  | 0.312867 |
| STAMBPL1 | 0.169477 | 0.023725 | 0.051339 |
| STAMPB   | 0.516609 | 1.56E-13 | 8.86E-12 |
| STAM     | -0.01015 | 0.893061 | 0.925331 |
| STAP1    | -0.05904 | 0.433768 | 0.545285 |
| STAP2    | 0.442017 | 6.54E-10 | 1.47E-08 |
| STARD10  | 0.167003 | 0.025876 | 0.055233 |
| STARD13  | -0.26481 | 0.000354 | 0.001418 |
| STARD3NL | -0.28263 | 0.000132 | 0.000607 |
| STARD3   | 0.130713 | 0.082015 | 0.145202 |
| STARD4   | -0.05802 | 0.441762 | 0.553574 |
| STARD5   | -0.03017 | 0.689364 | 0.772504 |
| STARD6   | 0.028982 | 0.70096  | 0.781664 |
| STARD7   | -0.27758 | 0.000176 | 0.000775 |
| STARD8   | -0.14526 | 0.053043 | 0.100831 |
| STAR     | -0.123   | 0.101909 | 0.17333  |
| STAT1    | 0.155043 | 0.038785 | 0.077632 |
| STAT2    | 0.131356 | 0.080508 | 0.142944 |
| STAT3    | -0.17311 | 0.020842 | 0.04595  |
| STAT4    | -0.26417 | 0.000366 | 0.001457 |
| STAT5A   | 0.175115 | 0.019389 | 0.043244 |
| STAT5B   | -0.2894  | 8.93E-05 | 0.000431 |
| STAT6    | 0.388488 | 8.39E-08 | 1.00E-06 |
| STATH    | 0.099288 | 0.187305 | 0.2823   |
| STAU1    | 0.137798 | 0.066614 | 0.122045 |
| STAU2    | -0.18091 | 0.015663 | 0.03614  |
| STBD1    | -0.21308 | 0.004295 | 0.012015 |
| STC1     | -0.10702 | 0.155082 | 0.242917 |
| STC2     | -0.3532  | 1.33E-06 | 1.11E-05 |
| STEAP1   | 0.351501 | 1.50E-06 | 1.23E-05 |
| STEAP2   | 0.141189 | 0.060128 | 0.111809 |
| STEAP3   | 0.494634 | 2.26E-12 | 9.60E-11 |
| STEAP4   | -0.0836  | 0.26721  | 0.374844 |
| STH      | -0.11001 | 0.143792 | 0.228304 |
| STIL     | 0.253518 | 0.000639 | 0.002337 |
| STIM1    | -0.16823 | 0.024789 | 0.053257 |
| STIM2    | -0.30138 | 4.35E-05 | 0.000233 |
| STIP1    | 0.119466 | 0.11221  | 0.187465 |
| STK10    | 0.047705 | 0.527168 | 0.632346 |
| STK11IP  | 0.027532 | 0.715253 | 0.792898 |
| STK11    | 0.110437 | 0.142233 | 0.226414 |
| STK16    | 0.08099  | 0.282509 | 0.391147 |
| STK17A   | 0.108923 | 0.147816 | 0.233441 |
| STK17B   | 0.054688 | 0.468435 | 0.578529 |
| STK19    | 0.110327 | 0.142634 | 0.226924 |

|           |          |          |          |
|-----------|----------|----------|----------|
| STK24     | 0.533049 | 1.86E-14 | 1.30E-12 |
| STK25     | 0.189054 | 0.011493 | 0.027812 |
| STK31     | 0.269749 | 0.000271 | 0.001124 |
| STK32A    | 0.026457 | 0.725925 | 0.801431 |
| STK32B    | -0.0987  | 0.189932 | 0.285432 |
| STK32C    | 0.03495  | 0.643263 | 0.73379  |
| STK33     | -0.24095 | 0.001196 | 0.004006 |
| STK35     | -0.38898 | 8.05E-08 | 9.69E-07 |
| STK36     | 0.168056 | 0.024941 | 0.053531 |
| STK38L    | 0.255253 | 0.000585 | 0.002172 |
| STK38     | 0.349148 | 1.78E-06 | 1.44E-05 |
| STK39     | 0.421788 | 4.53E-09 | 7.95E-08 |
| STK3      | 0.261766 | 0.000416 | 0.001625 |
| STK40     | -0.26265 | 0.000397 | 0.001562 |
| STK4      | -0.08757 | 0.245084 | 0.349912 |
| STL       | -0.12646 | 0.092551 | 0.16003  |
| STMN1     | -0.00933 | 0.901649 | 0.931223 |
| STMN2     | 0.143153 | 0.056614 | 0.106446 |
| STMN3     | -0.18296 | 0.014509 | 0.033888 |
| STMN4     | -0.18856 | 0.011715 | 0.028256 |
| STOML1    | 0.187064 | 0.01241  | 0.02969  |
| STOML2    | 0.089234 | 0.236215 | 0.340173 |
| STOML3    | -0.03049 | 0.686211 | 0.769919 |
| STOM      | -0.17724 | 0.017946 | 0.040519 |
| STON1-GTF | -0.16916 | 0.023995 | 0.051804 |
| STON1     | -0.03755 | 0.618724 | 0.713141 |
| STON2     | 0.184334 | 0.013773 | 0.03241  |
| STOX1     | -0.34603 | 2.23E-06 | 1.75E-05 |
| STOX2     | -0.14656 | 0.050922 | 0.097467 |
| STRA13    | 0.205515 | 0.005923 | 0.015809 |
| STRA6     | 0.437382 | 1.03E-09 | 2.17E-08 |
| STRA8     | 0.106146 | 0.158488 | 0.246887 |
| STRADA    | -0.07971 | 0.290183 | 0.399643 |
| STRADB    | -0.12821 | 0.088103 | 0.153765 |
| STRAP     | -0.26064 | 0.000442 | 0.001709 |
| STRBP     | -0.25005 | 0.000762 | 0.002728 |
| STRC      | 0.177997 | 0.017451 | 0.039565 |
| STRN3     | -0.08976 | 0.233459 | 0.337334 |
| STRN4     | 0.267876 | 0.0003   | 0.001229 |
| STRN      | -0.019   | 0.801245 | 0.860142 |
| STS       | 0.370484 | 3.57E-07 | 3.56E-06 |
| STT3A     | -0.03896 | 0.605632 | 0.701651 |
| STT3B     | -0.15233 | 0.042363 | 0.083726 |
| STUB1     | 0.152009 | 0.04281  | 0.084425 |
| STX10     | 0.347624 | 1.99E-06 | 1.58E-05 |
| STX11     | -0.00295 | 0.96886  | 0.97861  |
| STX12     | -0.20273 | 0.006648 | 0.017469 |
| STX16     | -0.05621 | 0.456105 | 0.567056 |
| STX17     | -0.20936 | 0.005037 | 0.013779 |
| STX18     | 0.045137 | 0.54966  | 0.652008 |
| STX19     | 0.370764 | 3.50E-07 | 3.49E-06 |
| STX1A     | 0.173685 | 0.020419 | 0.045198 |
| STX1B     | 0.237132 | 0.001437 | 0.004696 |
| STX2      | -0.30416 | 3.66E-05 | 0.0002   |

|         |          |          |          |
|---------|----------|----------|----------|
| STX3    | 0.117462 | 0.118405 | 0.195339 |
| STX4    | 0.538383 | 9.12E-15 | 6.76E-13 |
| STX5    | 0.00891  | 0.90604  | 0.93449  |
| STX6    | 0.287108 | 0.000102 | 0.000484 |
| STX7    | -0.01629 | 0.829089 | 0.879151 |
| STX8    | -0.04307 | 0.568125 | 0.667981 |
| STXBP1  | -0.56985 | 1.03E-16 | 1.25E-14 |
| STXBP2  | 0.543252 | 4.70E-15 | 3.69E-13 |
| STXBP3  | -0.00097 | 0.989714 | 0.992542 |
| STXBP4  | -0.27479 | 0.000206 | 0.000886 |
| STXBP5L | -0.39214 | 6.18E-08 | 7.65E-07 |
| STXBP5  | -0.5043  | 7.14E-13 | 3.38E-11 |
| STXBP6  | 0.01665  | 0.825412 | 0.876427 |
| STYK1   | 0.524924 | 5.41E-14 | 3.43E-12 |
| STYXL1  | 0.212694 | 0.004367 | 0.01218  |
| STYX    | -0.00967 | 0.898026 | 0.928937 |
| SUB1    | -0.14805 | 0.048583 | 0.093715 |
| SUCLA2  | -0.16441 | 0.028303 | 0.059603 |
| SUCLG1  | -0.04758 | 0.528274 | 0.633288 |
| SUCLG2  | 0.259676 | 0.000465 | 0.001782 |
| SUCNR1  | -0.01225 | 0.871085 | 0.911085 |
| SUDS3   | -0.1505  | 0.044946 | 0.087962 |
| SUFU    | 0.027187 | 0.718678 | 0.795429 |
| SUGT1L1 | -0.04853 | 0.520034 | 0.625687 |
| SUGT1P1 | -0.22351 | 0.002708 | 0.008096 |
| SUGT1   | 0.359293 | 8.42E-07 | 7.47E-06 |
| SULF1   | 0.236545 | 0.001478 | 0.004809 |
| SULF2   | 0.289078 | 9.10E-05 | 0.000438 |
| SULT1A1 | 0.146367 | 0.051231 | 0.097973 |
| SULT1A2 | 0.112468 | 0.134995 | 0.217183 |
| SULT1A3 | 0.318687 | 1.45E-05 | 8.99E-05 |
| SULT1B1 | 0.323458 | 1.06E-05 | 6.85E-05 |
| SULT1C2 | 0.463866 | 6.98E-11 | 2.05E-09 |
| SULT1C3 | -0.00667 | 0.929628 | 0.951325 |
| SULT1C4 | -0.17921 | 0.016687 | 0.03813  |
| SULT1E1 | 0.362469 | 6.63E-07 | 6.10E-06 |
| SULT2A1 | 0.041907 | 0.578611 | 0.677571 |
| SULT2B1 | 0.528484 | 3.41E-14 | 2.21E-12 |
| SULT4A1 | -0.08276 | 0.272074 | 0.380077 |
| SULT6B1 | -0.0722  | 0.338203 | 0.450375 |
| SUMF1   | 0.194243 | 0.009375 | 0.023368 |
| SUMF2   | -0.04496 | 0.55123  | 0.653528 |
| SUM01P1 | 0.0602   | 0.424735 | 0.537036 |
| SUM01P3 | 0.270162 | 0.000265 | 0.001104 |
| SUM01   | 0.40538  | 1.99E-08 | 2.85E-07 |
| SUM02   | 0.137196 | 0.067824 | 0.123848 |
| SUM03   | 0.354369 | 1.22E-06 | 1.03E-05 |
| SUM04   | 0.135922 | 0.070442 | 0.127933 |
| SUN1    | 0.156455 | 0.037022 | 0.074716 |
| SUN2    | 0.103396 | 0.169618 | 0.260891 |
| SUN3    | -0.04238 | 0.574351 | 0.673979 |
| SUOX    | -0.3874  | 9.18E-08 | 1.08E-06 |
| SUPT16H | -0.16163 | 0.031131 | 0.064608 |
| SUPT3H  | -0.04327 | 0.566323 | 0.666655 |



|          |          |          |          |
|----------|----------|----------|----------|
| SUPT4H1  | -0.04515 | 0.549547 | 0.651952 |
| SUPT5H   | 0.059513 | 0.43005  | 0.54192  |
| SUPT6H   | 0.011246 | 0.881564 | 0.917717 |
| SUPT7L   | -0.02198 | 0.77087  | 0.836939 |
| SUPV3L1  | -0.06894 | 0.360485 | 0.473605 |
| SURF1    | -0.01899 | 0.801322 | 0.860178 |
| SURF2    | -0.01735 | 0.818199 | 0.871107 |
| SURF4    | -0.36434 | 5.75E-07 | 5.37E-06 |
| SURF6    | 0.057245 | 0.447858 | 0.559052 |
| SUSD1    | -0.0877  | 0.244379 | 0.349158 |
| SUSD2    | 0.249507 | 0.000783 | 0.002796 |
| SUSD3    | 0.093122 | 0.216331 | 0.317527 |
| SUSD4    | -0.10608 | 0.158741 | 0.247238 |
| SUSD5    | -0.02639 | 0.726627 | 0.802028 |
| SUV39H1  | -0.10186 | 0.176088 | 0.268505 |
| SUV39H2  | -0.18272 | 0.014641 | 0.034168 |
| SUV420H1 | -0.08235 | 0.27448  | 0.382508 |
| SUV420H2 | 0.119825 | 0.111128 | 0.186051 |
| SUZ12P   | 0.091549 | 0.224229 | 0.326478 |
| SUZ12    | -0.15774 | 0.035474 | 0.072108 |
| SV2A     | -0.27601 | 0.000192 | 0.000836 |
| SV2B     | -0.20844 | 0.005236 | 0.014242 |
| SV2C     | -0.18621 | 0.012825 | 0.030543 |
| SVEP1    | -0.05656 | 0.453317 | 0.564263 |
| SVIL     | 0.132644 | 0.077558 | 0.138544 |
| SVIP     | -0.02412 | 0.749318 | 0.819888 |
| SVOPL    | 0.08076  | 0.283886 | 0.392793 |
| SVOP     | -0.24651 | 0.00091  | 0.003168 |
| SWAP70   | -0.03429 | 0.649554 | 0.738772 |
| SYAP1    | 0.053904 | 0.474841 | 0.584475 |
| SYBU     | -0.20266 | 0.006669 | 0.017517 |
| SYCE1L   | 0.198023 | 0.008058 | 0.020571 |
| SYCE1    | 0.001406 | 0.985141 | 0.989746 |
| SYCE2    | 0.071776 | 0.341052 | 0.453376 |
| SYCN     | -0.08313 | 0.269949 | 0.377695 |
| SYCP1    | -0.03291 | 0.66281  | 0.751166 |
| SYCP2L   | -0.13939 | 0.063499 | 0.117196 |
| SYCP2    | -0.06775 | 0.368876 | 0.482258 |
| SYCP3    | 0.078065 | 0.300314 | 0.410482 |
| SYDE1    | 0.21081  | 0.004735 | 0.013076 |
| SYDE2    | -0.27005 | 0.000267 | 0.00111  |
| SYF2     | 0.214081 | 0.004112 | 0.011598 |
| SYK      | 0.252669 | 0.000667 | 0.002425 |
| SYMPK    | 0.244535 | 0.001003 | 0.003443 |
| SYN1     | -0.1612  | 0.031586 | 0.065367 |
| SYN2     | -0.14943 | 0.046503 | 0.090435 |
| SYN3     | -0.22591 | 0.002429 | 0.007374 |
| SYNCRIP  | -0.12291 | 0.102157 | 0.173708 |
| SYNC     | 0.208791 | 0.00516  | 0.014066 |
| SYNE1    | -0.43787 | 9.83E-10 | 2.10E-08 |
| SYNE2    | -0.00886 | 0.906556 | 0.934776 |
| SYNGAP1  | -0.24255 | 0.001106 | 0.003744 |
| SYNGR1   | -0.29658 | 5.82E-05 | 0.000298 |
| SYNGR2   | 0.437903 | 9.80E-10 | 2.09E-08 |

|           |          |          |          |
|-----------|----------|----------|----------|
| SYNGR3    | -0.17675 | 0.018266 | 0.041105 |
| SYNGR4    | -0.18811 | 0.011918 | 0.028701 |
| SYNJ1     | -0.26546 | 0.000342 | 0.001372 |
| SYNJ2BP   | -0.20179 | 0.006912 | 0.018057 |
| SYNJ2     | -0.31985 | 1.35E-05 | 8.41E-05 |
| SYNM      | -0.22801 | 0.002206 | 0.00679  |
| SYNPO2L   | 0.089227 | 0.23625  | 0.340199 |
| SYNPO2    | -0.11404 | 0.129601 | 0.209956 |
| SYNPO     | 0.102564 | 0.173094 | 0.265104 |
| SYNPR     | -0.07711 | 0.306296 | 0.416554 |
| SYNRG     | -0.33515 | 4.81E-06 | 3.44E-05 |
| SYPL1     | 0.279302 | 0.00016  | 0.000714 |
| SYPL2     | -0.09847 | 0.190973 | 0.286735 |
| SYP       | -0.35984 | 8.09E-07 | 7.23E-06 |
| SYS1-DBNT | -0.07598 | 0.313473 | 0.424388 |
| SYS1      | -0.22832 | 0.002174 | 0.006708 |
| SYT10     | -0.35561 | 1.11E-06 | 9.51E-06 |
| SYT11     | -0.25505 | 0.000591 | 0.00219  |
| SYT12     | 0.363317 | 6.21E-07 | 5.75E-06 |
| SYT13     | 0.037607 | 0.618217 | 0.712734 |
| SYT14L    | -0.16295 | 0.029759 | 0.062257 |
| SYT14     | -0.36006 | 7.95E-07 | 7.13E-06 |
| SYT15     | -0.16095 | 0.031851 | 0.065819 |
| SYT16     | -0.06544 | 0.385499 | 0.498292 |
| SYT17     | 0.137301 | 0.067612 | 0.123507 |
| SYT1      | -0.18576 | 0.013045 | 0.030975 |
| SYT2      | -0.05989 | 0.427151 | 0.539259 |
| SYT3      | -0.24042 | 0.001227 | 0.004096 |
| SYT4      | -0.26665 | 0.000321 | 0.0013   |
| SYT5      | -0.26465 | 0.000357 | 0.001428 |
| SYT6      | -0.27513 | 0.000202 | 0.000873 |
| SYT7      | -0.36127 | 7.26E-07 | 6.60E-06 |
| SYT8      | 0.557088 | 6.71E-16 | 6.47E-14 |
| SYT9      | -0.26787 | 0.0003   | 0.001229 |
| SYTL1     | 0.295931 | 6.06E-05 | 0.000308 |
| SYTL2     | 0.332894 | 5.62E-06 | 3.94E-05 |
| SYTL3     | 0.020383 | 0.787119 | 0.849134 |
| SYTL4     | 0.350051 | 1.67E-06 | 1.36E-05 |
| SYTL5     | 0.213007 | 0.004308 | 0.012044 |
| SYVN1     | -0.02588 | 0.731656 | 0.805959 |
| TAAR1     | -0.20171 | 0.006934 | 0.018099 |
| TAAR5     | -0.05773 | 0.444048 | 0.555735 |
| TAAR6     | 0.005506 | 0.941854 | 0.960908 |
| TAAR8     | 0.134247 | 0.07401  | 0.133236 |
| TAB1      | -0.08678 | 0.249396 | 0.35489  |
| TAB2      | -0.20516 | 0.006012 | 0.016004 |
| TAB3      | -0.35003 | 1.67E-06 | 1.36E-05 |
| TAC1      | -0.05896 | 0.434352 | 0.54588  |
| TAC3      | 0.217348 | 0.003565 | 0.010232 |
| TAC4      | -0.0721  | 0.338887 | 0.451074 |
| TACC1     | -0.28321 | 0.000128 | 0.000589 |
| TACC2     | -0.06618 | 0.380084 | 0.492871 |
| TACC3     | 0.296368 | 5.90E-05 | 0.000302 |
| TACO1     | -0.02201 | 0.770603 | 0.836744 |

|         |          |          |          |
|---------|----------|----------|----------|
| TACR1   | -0.32536 | 9.36E-06 | 6.14E-05 |
| TACR2   | 0.099241 | 0.187515 | 0.282552 |
| TACR3   | -0.10303 | 0.171119 | 0.262691 |
| TACSTD2 | 0.562289 | 3.15E-16 | 3.42E-14 |
| TADA1   | -0.10778 | 0.15216  | 0.239098 |
| TADA2A  | -0.20522 | 0.005996 | 0.015975 |
| TADA2B  | -0.34569 | 2.29E-06 | 1.79E-05 |
| TADA3   | 0.247764 | 0.000855 | 0.003004 |
| TAF10   | 0.242679 | 0.001099 | 0.003725 |
| TAF11   | 0.016593 | 0.825996 | 0.87667  |
| TAF12   | 0.157827 | 0.035375 | 0.071957 |
| TAF13   | -0.1596  | 0.033343 | 0.068466 |
| TAF15   | 0.239342 | 0.001293 | 0.004289 |
| TAF1A   | 0.143117 | 0.056677 | 0.106514 |
| TAF1B   | 0.082201 | 0.275354 | 0.383332 |
| TAF1C   | 0.137681 | 0.066849 | 0.122407 |
| TAF1D   | 0.348664 | 1.85E-06 | 1.48E-05 |
| TAF1L   | -0.21846 | 0.003395 | 0.009807 |
| TAF1    | -0.24692 | 0.000892 | 0.003116 |
| TAF2    | -0.17221 | 0.021531 | 0.047201 |
| TAF3    | -0.19054 | 0.010846 | 0.026481 |
| TAF4B   | -0.06669 | 0.376406 | 0.489256 |
| TAF4    | -0.01217 | 0.871885 | 0.911337 |
| TAF5L   | 0.026207 | 0.728415 | 0.803328 |
| TAF5    | -0.33123 | 6.30E-06 | 4.36E-05 |
| TAF6L   | -0.07592 | 0.313846 | 0.424806 |
| TAF6    | 0.101766 | 0.176478 | 0.269016 |
| TAF7L   | 0.074073 | 0.32578  | 0.437813 |
| TAF7    | 0.061061 | 0.418132 | 0.530441 |
| TAF8    | -0.11702 | 0.119796 | 0.197108 |
| TAF9B   | -0.50188 | 9.55E-13 | 4.40E-11 |
| TAF9    | -0.02134 | 0.777396 | 0.841991 |
| TAGAP   | 0.013109 | 0.86212  | 0.904284 |
| TAGLN2  | 0.459418 | 1.12E-10 | 3.10E-09 |
| TAGLN3  | -0.25162 | 0.000704 | 0.002544 |
| TAGLN   | 0.218761 | 0.00335  | 0.009693 |
| TAL1    | -0.25438 | 0.000612 | 0.002255 |
| TAL2    | -0.36523 | 5.37E-07 | 5.06E-06 |
| TALD01  | 0.357312 | 9.77E-07 | 8.50E-06 |
| TANC1   | 0.314607 | 1.90E-05 | 0.000113 |
| TANC2   | -0.1527  | 0.041871 | 0.08282  |
| TANK    | 0.148824 | 0.047409 | 0.091945 |
| TAOK1   | -0.17921 | 0.016687 | 0.03813  |
| TAOK2   | -0.05961 | 0.429297 | 0.541213 |
| TAOK3   | 0.000924 | 0.990233 | 0.992893 |
| TAP1    | 0.341969 | 2.98E-06 | 2.26E-05 |
| TAP2    | 0.293912 | 6.83E-05 | 0.000342 |
| TAPBPL  | -0.23863 | 0.001338 | 0.004409 |
| TAPBP   | 0.31647  | 1.68E-05 | 0.000102 |
| TAPT1   | -0.33089 | 6.45E-06 | 4.44E-05 |
| TARBP1  | 0.021395 | 0.776822 | 0.841507 |
| TARBP2  | -0.02288 | 0.761739 | 0.830041 |
| TARDBP  | 0.037025 | 0.623666 | 0.717457 |
| TARM1   | -0.12902 | 0.086089 | 0.150915 |

|          |          |          |          |
|----------|----------|----------|----------|
| TARP     | -0.0837  | 0.266679 | 0.374207 |
| TARS2    | 0.173537 | 0.020527 | 0.045398 |
| TARSL2   | -0.14782 | 0.048946 | 0.094286 |
| TARS     | -0.22386 | 0.002666 | 0.007983 |
| TAS1R1   | 0.122896 | 0.102199 | 0.173765 |
| TAS1R2   | 0.036079 | 0.63257  | 0.724496 |
| TAS1R3   | 0.000435 | 0.9954   | 0.996913 |
| TAS2R10  | -0.13635 | 0.069555 | 0.126552 |
| TAS2R13  | -0.03168 | 0.674639 | 0.760825 |
| TAS2R14  | 0.011122 | 0.882863 | 0.918586 |
| TAS2R19  | -0.10029 | 0.182868 | 0.276751 |
| TAS2R1   | -0.1433  | 0.056359 | 0.106057 |
| TAS2R20  | -0.03623 | 0.631179 | 0.723449 |
| TAS2R30  | 0.067525 | 0.370479 | 0.483714 |
| TAS2R31  | -0.1618  | 0.030954 | 0.064301 |
| TAS2R38  | -0.00717 | 0.924312 | 0.947636 |
| TAS2R3   | -0.01666 | 0.825342 | 0.8764   |
| TAS2R40  | -0.13732 | 0.067574 | 0.123448 |
| TAS2R41  | 0.081601 | 0.278885 | 0.387212 |
| TAS2R42  | -0.05591 | 0.458563 | 0.56911  |
| TAS2R43  | 0.006677 | 0.929512 | 0.951325 |
| TAS2R46  | -0.04003 | 0.595748 | 0.692961 |
| TAS2R4   | -0.05791 | 0.44256  | 0.554294 |
| TAS2R50  | -0.2344  | 0.001637 | 0.005258 |
| TAS2R5   | 0.017072 | 0.821062 | 0.873257 |
| TAS2R60  | 0.047462 | 0.529278 | 0.633768 |
| TAS2R7   | -0.09737 | 0.196019 | 0.292911 |
| TAS2R8   | -0.16507 | 0.027668 | 0.058452 |
| TAS2R9   | -0.04744 | 0.529456 | 0.633936 |
| TASP1    | -0.10562 | 0.160589 | 0.249567 |
| TATDN1   | 0.136735 | 0.068762 | 0.125352 |
| TATDN2   | -0.25675 | 0.000541 | 0.002035 |
| TATDN3   | -0.38765 | 8.99E-08 | 1.07E-06 |
| TAT      | -0.21142 | 0.004612 | 0.012777 |
| TAX1BP1  | 0.046403 | 0.538513 | 0.641771 |
| TAX1BP3  | 0.457171 | 1.41E-10 | 3.80E-09 |
| TAZ      | 0.281276 | 0.000143 | 0.000649 |
| TBC1D10A | 0.328296 | 7.68E-06 | 5.17E-05 |
| TBC1D10B | 0.230279 | 0.001986 | 0.006197 |
| TBC1D10C | 0.041653 | 0.580921 | 0.679873 |
| TBC1D12  | -0.17114 | 0.022363 | 0.048753 |
| TBC1D13  | -0.41669 | 7.23E-09 | 1.19E-07 |
| TBC1D14  | -0.51956 | 1.08E-13 | 6.32E-12 |
| TBC1D15  | -0.43179 | 1.77E-09 | 3.48E-08 |
| TBC1D16  | -0.37838 | 1.91E-07 | 2.06E-06 |
| TBC1D17  | 0.004636 | 0.951028 | 0.96696  |
| TBC1D19  | -0.35363 | 1.28E-06 | 1.08E-05 |
| TBC1D1   | 0.135789 | 0.070721 | 0.128363 |
| TBC1D20  | -0.40323 | 2.40E-08 | 3.38E-07 |
| TBC1D22A | 0.162931 | 0.029781 | 0.06229  |
| TBC1D22B | -0.24608 | 0.000929 | 0.003224 |
| TBC1D23  | -0.07077 | 0.3479   | 0.460344 |
| TBC1D24  | -0.18556 | 0.013147 | 0.031185 |
| TBC1D25  | -0.0695  | 0.356628 | 0.469786 |

|          |          |          |          |
|----------|----------|----------|----------|
| TBC1D26  | 0.10308  | 0.170932 | 0.262443 |
| TBC1D28  | -0.14534 | 0.052906 | 0.100618 |
| TBC1D29  | -0.03157 | 0.675716 | 0.761782 |
| TBC1D2B  | -0.14508 | 0.053329 | 0.101289 |
| TBC1D2   | 0.36648  | 4.88E-07 | 4.64E-06 |
| TBC1D3B  | 0.403126 | 2.42E-08 | 3.40E-07 |
| TBC1D3C  | 0.305116 | 3.45E-05 | 0.00019  |
| TBC1D3G  | 0.057921 | 0.442507 | 0.554262 |
| TBC1D3H  | 0.20033  | 0.007337 | 0.01896  |
| TBC1D3P2 | 0.197514 | 0.008225 | 0.020919 |
| TBC1D3   | 0.347596 | 2.00E-06 | 1.58E-05 |
| TBC1D4   | 0.013706 | 0.855916 | 0.89959  |
| TBC1D5   | -0.26263 | 0.000398 | 0.001564 |
| TBC1D7   | 0.107931 | 0.151566 | 0.238335 |
| TBC1D8B  | -0.02188 | 0.771902 | 0.837532 |
| TBC1D8   | -0.11374 | 0.130626 | 0.211288 |
| TBC1D9B  | -0.08295 | 0.27096  | 0.378789 |
| TBC1D9   | -0.33366 | 5.33E-06 | 3.76E-05 |
| TBCA     | -0.02952 | 0.695638 | 0.777238 |
| TBCB     | 0.070453 | 0.350043 | 0.46256  |
| TBCCD1   | 0.209439 | 0.00502  | 0.013744 |
| TBCC     | -0.21364 | 0.004191 | 0.011781 |
| TBCD     | -0.03731 | 0.621015 | 0.715156 |
| TBCEL    | -0.28321 | 0.000128 | 0.000589 |
| TBCE     | 0.223379 | 0.002725 | 0.008135 |
| TBCK     | -0.08149 | 0.279545 | 0.387937 |
| TBK1     | -0.15037 | 0.045131 | 0.088296 |
| TBKBP1   | -0.17039 | 0.022974 | 0.049894 |
| TBL1XR1  | 0.25422  | 0.000616 | 0.002267 |
| TBL1X    | -0.52039 | 9.68E-14 | 5.75E-12 |
| TBL1Y    | -0.23782 | 0.001391 | 0.004563 |
| TBL2     | -0.06363 | 0.398806 | 0.51138  |
| TBL3     | 0.285775 | 0.00011  | 0.000518 |
| TBPL1    | -0.28793 | 9.73E-05 | 0.000464 |
| TBPL2    | 0.08099  | 0.28251  | 0.391147 |
| TBP      | -0.2386  | 0.001339 | 0.004414 |
| TBR1     | -0.05426 | 0.47191  | 0.58184  |
| TBRG1    | 0.235694 | 0.001539 | 0.004983 |
| TBRG4    | 0.238693 | 0.001334 | 0.004398 |
| TBX10    | -0.04213 | 0.576598 | 0.675773 |
| TBX15    | 0.414354 | 8.94E-09 | 1.44E-07 |
| TBX18    | 0.048882 | 0.517014 | 0.623173 |
| TBX19    | 0.027994 | 0.710693 | 0.789463 |
| TBX1     | -0.01015 | 0.893059 | 0.925331 |
| TBX20    | 0.055775 | 0.459626 | 0.570179 |
| TBX21    | -0.15075 | 0.044584 | 0.087339 |
| TBX22    | -0.18125 | 0.015468 | 0.035756 |
| TBX2     | 0.108359 | 0.149938 | 0.236264 |
| TBX3     | 0.106561 | 0.156859 | 0.245113 |
| TBX4     | 0.199562 | 0.00757  | 0.019489 |
| TBX5     | 0.060301 | 0.42396  | 0.536262 |
| TBX6     | 0.506615 | 5.39E-13 | 2.70E-11 |
| TBXA2R   | -0.02563 | 0.734128 | 0.807872 |
| TBXAS1   | 0.067687 | 0.369329 | 0.482658 |

|         |          |          |          |
|---------|----------|----------|----------|
| TC2N    | 0.160512 | 0.03233  | 0.066704 |
| TCAM1P  | 0.008157 | 0.913941 | 0.939845 |
| TCAP    | -0.06439 | 0.393136 | 0.505782 |
| TCEA1   | -0.07718 | 0.305866 | 0.416136 |
| TCEA2   | 0.036111 | 0.632264 | 0.724308 |
| TCEA3   | 0.147857 | 0.048884 | 0.094196 |
| TCEAL1  | -0.35945 | 8.33E-07 | 7.40E-06 |
| TCEAL2  | -0.27237 | 0.000235 | 0.000995 |
| TCEAL3  | -0.25327 | 0.000647 | 0.002363 |
| TCEAL4  | -0.17432 | 0.019953 | 0.044356 |
| TCEAL5  | -0.33931 | 3.60E-06 | 2.66E-05 |
| TCEAL6  | -0.28448 | 0.000119 | 0.000553 |
| TCEAL7  | -0.01016 | 0.892946 | 0.925331 |
| TCEAL8  | -0.28099 | 0.000145 | 0.000657 |
| TCEANC  | -0.38358 | 1.26E-07 | 1.42E-06 |
| TCEB1   | 0.177094 | 0.018039 | 0.040683 |
| TCEB2   | 0.31505  | 1.84E-05 | 0.00011  |
| TCEB3B  | -0.08016 | 0.287473 | 0.396742 |
| TCEB3C  | -0.03965 | 0.599219 | 0.696015 |
| TCEB3   | -0.39783 | 3.82E-08 | 5.00E-07 |
| TCERG1L | -0.11498 | 0.126443 | 0.205852 |
| TCERG1  | 0.166945 | 0.025928 | 0.055325 |
| TCF12   | -0.00369 | 0.961028 | 0.973383 |
| TCF15   | 0.083997 | 0.264965 | 0.372329 |
| TCF19   | 0.221198 | 0.003005 | 0.008867 |
| TCF20   | -0.08352 | 0.26771  | 0.375279 |
| TCF21   | 0.078728 | 0.296215 | 0.406232 |
| TCF23   | -0.09808 | 0.192733 | 0.288917 |
| TCF25   | 0.21132  | 0.004632 | 0.012827 |
| TCF3    | 0.354793 | 1.18E-06 | 9.99E-06 |
| TCF4    | -0.1117  | 0.137702 | 0.22064  |
| TCF7L1  | -0.03804 | 0.61421  | 0.709405 |
| TCF7L2  | 0.383747 | 1.24E-07 | 1.41E-06 |
| TCF7    | 0.211198 | 0.004657 | 0.012884 |
| TCFL5   | -0.35141 | 1.51E-06 | 1.24E-05 |
| TCHHL1  | 0.05114  | 0.49782  | 0.605286 |
| TCHH    | 0.024437 | 0.746098 | 0.817224 |
| TCHP    | -0.36673 | 4.78E-07 | 4.56E-06 |
| TCIRG1  | 0.416279 | 7.51E-09 | 1.23E-07 |
| TCL1A   | -0.06789 | 0.367916 | 0.481417 |
| TCL1B   | -0.06231 | 0.408666 | 0.520815 |
| TCL6    | -0.1222  | 0.104176 | 0.176595 |
| TCN1    | 0.411116 | 1.20E-08 | 1.84E-07 |
| TCN2    | 0.115754 | 0.123892 | 0.202382 |
| TCOF1   | -0.03988 | 0.597097 | 0.69408  |
| TCP10L2 | -0.13867 | 0.0649   | 0.119313 |
| TCP10L  | -0.03811 | 0.613529 | 0.708889 |
| TCP10   | -0.1336  | 0.075422 | 0.135408 |
| TCP11L1 | -0.08922 | 0.23629  | 0.340207 |
| TCP11L2 | -0.36449 | 5.68E-07 | 5.32E-06 |
| TCP11   | 0.126673 | 0.092004 | 0.159293 |
| TCP1    | -0.21025 | 0.004849 | 0.013351 |
| TCTA    | -0.27314 | 0.000225 | 0.000958 |
| TCTE1   | -0.12829 | 0.087895 | 0.153518 |

|          |          |          |          |
|----------|----------|----------|----------|
| TCTE3    | -0.05339 | 0.479097 | 0.588609 |
| TCTEX1D1 | -0.03776 | 0.61674  | 0.711382 |
| TCTEX1D2 | -0.09061 | 0.229053 | 0.332062 |
| TCTEX1D4 | -0.0422  | 0.575996 | 0.675228 |
| TCTN1    | -0.40923 | 1.41E-08 | 2.12E-07 |
| TCTN2    | -0.17044 | 0.022928 | 0.049815 |
| TCTN3    | -0.2167  | 0.003668 | 0.010497 |
| TDGF1    | -0.11829 | 0.115827 | 0.192063 |
| TDGF3    | -0.19199 | 0.01025  | 0.025212 |
| TDG      | -0.21885 | 0.003336 | 0.009661 |
| TDH      | -0.10662 | 0.15664  | 0.244854 |
| TD02     | 0.115142 | 0.125902 | 0.20516  |
| TDP1     | -0.1158  | 0.12375  | 0.202183 |
| TDP2     | -0.3375  | 4.08E-06 | 2.98E-05 |
| TDRD10   | -0.1431  | 0.056704 | 0.106534 |
| TDRD12   | -0.09198 | 0.222041 | 0.324149 |
| TDRD1    | -0.05215 | 0.489375 | 0.597893 |
| TDRD3    | 0.05032  | 0.504742 | 0.611716 |
| TDRD5    | 0.022629 | 0.764315 | 0.83197  |
| TDRD6    | -0.34663 | 2.14E-06 | 1.69E-05 |
| TDRD7    | 0.007956 | 0.916059 | 0.941585 |
| TDRD9    | -0.30316 | 3.90E-05 | 0.000212 |
| TDRG1    | -0.10853 | 0.149302 | 0.23545  |
| TDRKH    | -0.15186 | 0.043019 | 0.084778 |
| TEAD1    | -0.14979 | 0.045972 | 0.089589 |
| TEAD2    | 0.039885 | 0.597088 | 0.69408  |
| TEAD3    | 0.436859 | 1.08E-09 | 2.26E-08 |
| TEAD4    | 0.210623 | 0.004773 | 0.013166 |
| TECPR1   | -0.24819 | 0.000837 | 0.002949 |
| TECPR2   | -0.43863 | 9.13E-10 | 1.96E-08 |
| TECR     | 0.239065 | 0.00131  | 0.00433  |
| TECTA    | -0.3809  | 1.56E-07 | 1.73E-06 |
| TECTB    | 0.052407 | 0.487209 | 0.596007 |
| TEC      | 0.318953 | 1.43E-05 | 8.86E-05 |
| TEDDM1   | 0.057376 | 0.446821 | 0.558004 |
| TEF      | -0.23926 | 0.001298 | 0.004303 |
| TEKT1    | -0.15076 | 0.044574 | 0.087336 |
| TEKT2    | -0.26066 | 0.000441 | 0.001709 |
| TEKT3    | -0.12211 | 0.104437 | 0.176947 |
| TEKT4    | -0.06095 | 0.419006 | 0.531288 |
| TEKT5    | 0.207766 | 0.005388 | 0.014584 |
| TEK      | -0.24262 | 0.001102 | 0.003734 |
| TELO2    | 0.21108  | 0.00468  | 0.012942 |
| TENC1    | -0.27028 | 0.000263 | 0.001097 |
| TEP1     | 0.285549 | 0.000112 | 0.000525 |
| TEPP     | -0.16756 | 0.025378 | 0.054289 |
| TERC     | -0.07654 | 0.309915 | 0.420385 |
| TERF1    | -0.23786 | 0.001388 | 0.004556 |
| TERF2IP  | -0.31692 | 1.63E-05 | 9.92E-05 |
| TERF2    | -0.08866 | 0.239273 | 0.343526 |
| TERT     | 0.06712  | 0.373365 | 0.486454 |
| TESC     | 0.323298 | 1.07E-05 | 6.91E-05 |
| TESK1    | 0.051542 | 0.494442 | 0.602564 |
| TESK2    | -0.15312 | 0.041297 | 0.081882 |

|         |          |          |          |
|---------|----------|----------|----------|
| TES     | 0.460012 | 1.05E-10 | 2.93E-09 |
| TET1    | -0.11329 | 0.132155 | 0.213342 |
| TET2    | -0.20598 | 0.005808 | 0.01555  |
| TET3    | 0.154252 | 0.039802 | 0.079355 |
| TEX101  | -0.05706 | 0.449314 | 0.560304 |
| TEX10   | -0.15781 | 0.035394 | 0.071982 |
| TEX11   | -0.14838 | 0.048078 | 0.092968 |
| TEX12   | 0.040676 | 0.589824 | 0.687769 |
| TEX13A  | 0.130682 | 0.082087 | 0.145258 |
| TEX13B  | 0.141053 | 0.060377 | 0.112156 |
| TEX14   | -0.10591 | 0.159418 | 0.248039 |
| TEX15   | 0.037091 | 0.623043 | 0.716866 |
| TEX19   | -0.01999 | 0.791139 | 0.852162 |
| TEX261  | -0.26805 | 0.000298 | 0.00122  |
| TEX264  | 0.19163  | 0.010394 | 0.025519 |
| TEX2    | -0.4496  | 3.06E-10 | 7.61E-09 |
| TEX9    | -0.11106 | 0.139967 | 0.223471 |
| TFAMP1  | 0.013564 | 0.857391 | 0.900569 |
| TFAM    | -0.2279  | 0.002217 | 0.006822 |
| TFAP2A  | 0.498329 | 1.46E-12 | 6.56E-11 |
| TFAP2B  | -0.09973 | 0.185324 | 0.279741 |
| TFAP2C  | 0.128547 | 0.087255 | 0.152608 |
| TFAP2D  | 0.103472 | 0.169299 | 0.260507 |
| TFAP2E  | 0.248301 | 0.000832 | 0.002935 |
| TFAP4   | 0.01115  | 0.882563 | 0.91837  |
| TFB1M   | 0.103896 | 0.16755  | 0.258435 |
| TFB2M   | -0.15064 | 0.044742 | 0.087623 |
| TFCP2L1 | 0.405785 | 1.92E-08 | 2.77E-07 |
| TFCP2   | -0.28427 | 0.00012  | 0.000559 |
| TFDP1   | 0.184728 | 0.013568 | 0.032043 |
| TFDP2   | 0.225386 | 0.002488 | 0.007523 |
| TFDP3   | -0.08722 | 0.246987 | 0.35207  |
| TFE3    | 0.039909 | 0.596867 | 0.693935 |
| TFEB    | 0.072151 | 0.338528 | 0.450717 |
| TFEC    | 0.015837 | 0.833808 | 0.882262 |
| TFF1    | 0.467694 | 4.64E-11 | 1.45E-09 |
| TFF2    | 0.420623 | 5.04E-09 | 8.74E-08 |
| TFF3    | 0.239845 | 0.001262 | 0.004199 |
| TFG     | 0.250227 | 0.000755 | 0.002706 |
| TFIP11  | 0.019238 | 0.798817 | 0.858328 |
| TFPI2   | 0.03003  | 0.690691 | 0.773659 |
| TFPI    | 0.334137 | 5.16E-06 | 3.66E-05 |
| TFPT    | 0.155534 | 0.038163 | 0.076602 |
| TFR2    | 0.095789 | 0.203408 | 0.302102 |
| TFRC    | 0.080621 | 0.284715 | 0.393648 |
| TF      | -0.14713 | 0.050024 | 0.096009 |
| TGDS    | 0.065622 | 0.384149 | 0.496963 |
| TGFA    | 0.529655 | 2.92E-14 | 1.93E-12 |
| TGFB1I1 | 0.378083 | 1.96E-07 | 2.11E-06 |
| TGFB1   | 0.289971 | 8.63E-05 | 0.000418 |
| TGFB2   | 0.277948 | 0.000172 | 0.000762 |
| TGFB3   | 0.03078  | 0.683375 | 0.76783  |
| TGFB1   | 0.217127 | 0.0036   | 0.010321 |
| TGFBR1  | -0.04052 | 0.591296 | 0.688795 |



|          |          |          |          |
|----------|----------|----------|----------|
| TGFBR2   | 0.124667 | 0.097312 | 0.166833 |
| TGFBR3   | -0.20875 | 0.005168 | 0.014083 |
| TGFBRAP1 | -0.22973 | 0.002037 | 0.006332 |
| TGIF1    | 0.396077 | 4.44E-08 | 5.73E-07 |
| TGIF2LX  | -0.14148 | 0.059591 | 0.110949 |
| TGIF2LY  | -0.10945 | 0.145849 | 0.231017 |
| TGIF2    | 0.262952 | 0.000391 | 0.00154  |
| TGM1     | 0.227197 | 0.00229  | 0.007012 |
| TGM2     | 0.402172 | 2.63E-08 | 3.63E-07 |
| TGM3     | -0.20695 | 0.005577 | 0.015016 |
| TGM4     | 0.122176 | 0.10424  | 0.176689 |
| TGM5     | 0.389921 | 7.45E-08 | 9.03E-07 |
| TGM7     | 0.04452  | 0.555138 | 0.656654 |
| TGOLN2   | -0.13324 | 0.076222 | 0.136535 |
| TGS1     | -0.14813 | 0.04847  | 0.093525 |
| TG       | 0.059606 | 0.429328 | 0.541217 |
| TH1L     | -0.12631 | 0.09296  | 0.160596 |
| THADA    | 0.149416 | 0.046524 | 0.090459 |
| THAP10   | -0.20875 | 0.005168 | 0.014083 |
| THAP11   | -0.03951 | 0.600532 | 0.697052 |
| THAP1    | -0.20984 | 0.004935 | 0.013546 |
| THAP2    | -0.37583 | 2.35E-07 | 2.47E-06 |
| THAP3    | 0.009642 | 0.898359 | 0.929165 |
| THAP4    | 0.245834 | 0.000941 | 0.003257 |
| THAP5    | -0.49282 | 2.79E-12 | 1.16E-10 |
| THAP6    | -0.25339 | 0.000643 | 0.002351 |
| THAP7    | -0.08587 | 0.254421 | 0.360666 |
| THAP8    | -0.15613 | 0.037421 | 0.075361 |
| THAP9    | -0.48459 | 7.19E-12 | 2.67E-10 |
| THBD     | 0.040455 | 0.591849 | 0.689272 |
| THBS1    | 0.028775 | 0.702995 | 0.783332 |
| THBS2    | 0.26905  | 0.000282 | 0.001163 |
| THBS3    | 0.182433 | 0.014797 | 0.034454 |
| THBS4    | -0.0907  | 0.228583 | 0.331475 |
| THEG     | -0.11906 | 0.113443 | 0.188955 |
| THEM4    | -0.26982 | 0.00027  | 0.001122 |
| THEM5    | -0.11897 | 0.113719 | 0.18933  |
| THEMIS   | -0.15716 | 0.036172 | 0.073278 |
| THG1L    | 0.181052 | 0.015583 | 0.035963 |
| THNSL1   | -0.31743 | 1.58E-05 | 9.65E-05 |
| THNSL2   | 0.266095 | 0.000331 | 0.001333 |
| THOC1    | 0.062196 | 0.409509 | 0.521587 |
| THOC2    | -0.20445 | 0.006193 | 0.016428 |
| THOC3    | 0.248318 | 0.000831 | 0.002934 |
| THOC4    | 0.084719 | 0.260861 | 0.367529 |
| THOC5    | -0.0286  | 0.704732 | 0.784782 |
| THOC6    | 0.331538 | 6.17E-06 | 4.28E-05 |
| THOC7    | 0.256422 | 0.00055  | 0.002063 |
| THOP1    | -0.10691 | 0.155482 | 0.243448 |
| THPO     | -0.01125 | 0.881484 | 0.917683 |
| THRAP3   | -0.14268 | 0.057453 | 0.107726 |
| THRA     | -0.23596 | 0.00152  | 0.004928 |
| THRB     | -0.07134 | 0.343987 | 0.456357 |
| THRSP    | -0.20194 | 0.006869 | 0.017965 |

|          |          |          |          |
|----------|----------|----------|----------|
| THSD1P1  | -0.05911 | 0.433171 | 0.544812 |
| THSD1    | -0.16854 | 0.024517 | 0.052777 |
| THSD4    | 0.173653 | 0.020441 | 0.045244 |
| THSD7A   | -0.19229 | 0.010127 | 0.024965 |
| THSD7B   | 0.163124 | 0.029585 | 0.061926 |
| THTPA    | -0.40974 | 1.35E-08 | 2.04E-07 |
| THUMPD1  | -0.18381 | 0.014049 | 0.032947 |
| THUMPD2  | 0.388658 | 8.27E-08 | 9.90E-07 |
| THUMPD3  | -0.01043 | 0.890081 | 0.923618 |
| THY1     | 0.151532 | 0.043475 | 0.085556 |
| THYN1    | 0.195325 | 0.00898  | 0.022497 |
| TH       | 0.073315 | 0.330768 | 0.442764 |
| TIA1     | 0.098521 | 0.19075  | 0.286488 |
| TIAF1    | 0.260193 | 0.000452 | 0.001744 |
| TIAL1    | 0.045833 | 0.543521 | 0.646471 |
| TIAM1    | -0.22889 | 0.002118 | 0.006556 |
| TIAM2    | 0.098595 | 0.190419 | 0.286055 |
| TICAM1   | 0.481667 | 9.99E-12 | 3.57E-10 |
| TICAM2   | 0.187157 | 0.012365 | 0.029606 |
| TIE1     | -0.13735 | 0.06751  | 0.123389 |
| TIFAB    | -0.05176 | 0.492592 | 0.601086 |
| TIFA     | -0.22751 | 0.002257 | 0.006927 |
| TIGD1    | 0.243338 | 0.001064 | 0.003622 |
| TIGD2    | -0.01164 | 0.877395 | 0.915042 |
| TIGD3    | -0.10566 | 0.160424 | 0.249369 |
| TIGD4    | -0.28798 | 9.70E-05 | 0.000463 |
| TIGD5    | -0.06311 | 0.402638 | 0.515324 |
| TIGD6    | -0.31704 | 1.62E-05 | 9.86E-05 |
| TIGD7    | -0.253   | 0.000656 | 0.002388 |
| TIGIT    | 0.021933 | 0.771365 | 0.837291 |
| TIMD4    | -0.04139 | 0.583281 | 0.68207  |
| TIMELESS | -0.1734  | 0.020631 | 0.045603 |
| TIMM10   | 0.221548 | 0.002958 | 0.008746 |
| TIMM13   | 0.033227 | 0.659717 | 0.748221 |
| TIMM16   | 0.19456  | 0.009258 | 0.023108 |
| TIMM17A  | 0.285014 | 0.000115 | 0.000538 |
| TIMM17B  | 0.127768 | 0.089207 | 0.155303 |
| TIMM22   | -0.38686 | 9.60E-08 | 1.12E-06 |
| TIMM44   | -0.01392 | 0.853652 | 0.897688 |
| TIMM50   | 0.157768 | 0.035444 | 0.072069 |
| TIMM8A   | 0.136527 | 0.069188 | 0.125998 |
| TIMM8B   | 0.278776 | 0.000164 | 0.000732 |
| TIMM9    | 0.015726 | 0.834958 | 0.883102 |
| TIMP1    | 0.287403 | 0.0001   | 0.000477 |
| TIMP2    | 0.141915 | 0.058809 | 0.109758 |
| TIMP3    | 0.123567 | 0.100326 | 0.17104  |
| TIMP4    | 0.003119 | 0.967044 | 0.977474 |
| TINAGL1  | 0.573097 | 6.29E-17 | 8.35E-15 |
| TINAG    | 0.297892 | 5.38E-05 | 0.000279 |
| TINF2    | -0.20385 | 0.006347 | 0.016784 |
| TIPARP   | 0.201343 | 0.007039 | 0.018332 |
| TIPIN    | -0.08411 | 0.2643   | 0.37158  |
| TIPRL    | 0.044672 | 0.55379  | 0.655567 |
| TIRAP    | -0.22089 | 0.003047 | 0.008958 |

|         |          |          |          |
|---------|----------|----------|----------|
| TJAP1   | -0.00107 | 0.988741 | 0.991989 |
| TJP1    | 0.206587 | 0.005662 | 0.015217 |
| TJP2    | 0.314179 | 1.95E-05 | 0.000116 |
| TJP3    | 0.504869 | 6.67E-13 | 3.20E-11 |
| TK1     | 0.47577  | 1.93E-11 | 6.43E-10 |
| TK2     | 0.403168 | 2.41E-08 | 3.39E-07 |
| TKTL1   | -0.17612 | 0.01869  | 0.041917 |
| TKTL2   | 0.263997 | 0.00037  | 0.00147  |
| TKT     | 0.231033 | 0.001917 | 0.006016 |
| TLCD1   | 0.291248 | 8.01E-05 | 0.000391 |
| TLE1    | -0.08852 | 0.239985 | 0.344298 |
| TLE2    | -0.24343 | 0.001059 | 0.003607 |
| TLE3    | 0.148372 | 0.048095 | 0.092991 |
| TLE4    | -0.00104 | 0.989028 | 0.992088 |
| TLE6    | 0.031959 | 0.671939 | 0.758603 |
| TLK1    | -0.11475 | 0.127206 | 0.206857 |
| TLK2    | -0.20514 | 0.006015 | 0.016009 |
| TLL1    | -0.12377 | 0.099754 | 0.170281 |
| TLL2    | -0.0495  | 0.511727 | 0.617947 |
| TLN1    | -0.01872 | 0.804145 | 0.861571 |
| TLN2    | 0.156442 | 0.037038 | 0.074733 |
| TLR10   | -0.07864 | 0.296771 | 0.406649 |
| TLR1    | 0.02069  | 0.78399  | 0.846763 |
| TLR2    | 0.094633 | 0.208938 | 0.308624 |
| TLR3    | 0.250531 | 0.000744 | 0.002671 |
| TLR4    | -0.18396 | 0.01397  | 0.032791 |
| TLR5    | 0.065262 | 0.386769 | 0.499508 |
| TLR6    | -0.0059  | 0.937742 | 0.957845 |
| TLR7    | -0.07424 | 0.324715 | 0.436797 |
| TLR8    | -0.07815 | 0.299794 | 0.409931 |
| TLR9    | 0.141916 | 0.058807 | 0.109758 |
| TLX1NB  | 0.0621   | 0.410241 | 0.522351 |
| TLX1    | 0.2468   | 0.000897 | 0.003131 |
| TLX2    | 0.191709 | 0.010362 | 0.025449 |
| TLX3    | -0.09999 | 0.184205 | 0.27837  |
| TM2D1   | 0.059721 | 0.428439 | 0.54051  |
| TM2D2   | 0.295864 | 6.08E-05 | 0.000309 |
| TM2D3   | -0.21906 | 0.003306 | 0.009586 |
| TM4SF18 | -0.31087 | 2.41E-05 | 0.000139 |
| TM4SF19 | 0.147888 | 0.048837 | 0.094127 |
| TM4SF1  | 0.622547 | 1.75E-20 | 5.66E-18 |
| TM4SF20 | 0.144962 | 0.053531 | 0.101624 |
| TM4SF4  | 0.139001 | 0.064252 | 0.118243 |
| TM4SF5  | 0.179176 | 0.016709 | 0.038168 |
| TM6SF1  | -0.15951 | 0.033439 | 0.068627 |
| TM6SF2  | 0.417897 | 6.48E-09 | 1.09E-07 |
| TM7SF2  | 0.161798 | 0.030952 | 0.064301 |
| TM7SF3  | -0.08095 | 0.282722 | 0.391358 |
| TM7SF4  | 0.179174 | 0.01671  | 0.038168 |
| TM9SF1  | -0.15184 | 0.043047 | 0.084823 |
| TM9SF2  | -0.14661 | 0.050837 | 0.097342 |
| TM9SF3  | 0.129598 | 0.084681 | 0.148909 |
| TM9SF4  | 0.03691  | 0.62474  | 0.7184   |
| TMBIM1  | 0.597102 | 1.41E-18 | 2.95E-16 |

|           |          |          |          |
|-----------|----------|----------|----------|
| TMBIM4    | -0.02622 | 0.728263 | 0.803206 |
| TMBIM6    | -0.08673 | 0.249669 | 0.355072 |
| TMC1      | 0.044959 | 0.551239 | 0.653528 |
| TMC2      | -0.27434 | 0.000211 | 0.000904 |
| TMC3      | -0.33035 | 6.69E-06 | 4.58E-05 |
| TMC4      | 0.364855 | 5.52E-07 | 5.20E-06 |
| TMC5      | 0.435829 | 1.20E-09 | 2.46E-08 |
| TMC6      | 0.506917 | 5.20E-13 | 2.62E-11 |
| TMC7      | 0.596043 | 1.68E-18 | 3.45E-16 |
| TMC8      | 0.102713 | 0.172468 | 0.264269 |
| TMCC1     | 0.149922 | 0.045779 | 0.089284 |
| TMCC2     | -0.32065 | 1.28E-05 | 8.04E-05 |
| TMCC3     | -0.17035 | 0.023004 | 0.049955 |
| TMCO1     | 0.142933 | 0.057    | 0.106998 |
| TMCO2     | -0.18663 | 0.012616 | 0.030123 |
| TMCO3     | -0.17204 | 0.021662 | 0.047447 |
| TMCO4     | 0.25576  | 0.00057  | 0.002125 |
| TMCO5A    | 0.151219 | 0.043915 | 0.086276 |
| TMCO6     | 0.179422 | 0.016557 | 0.037884 |
| TMCO7     | -0.12079 | 0.10827  | 0.18216  |
| TMED10P1  | -0.21481 | 0.003984 | 0.011285 |
| TMED10    | -0.17114 | 0.022365 | 0.048753 |
| TMED1     | 0.040626 | 0.590288 | 0.688229 |
| TMED2     | -0.28974 | 8.75E-05 | 0.000423 |
| TMED3     | 0.111228 | 0.139379 | 0.222732 |
| TMED4     | -0.3941  | 5.24E-08 | 6.64E-07 |
| TMED5     | -0.21365 | 0.004189 | 0.011777 |
| TMED6     | -0.23444 | 0.001634 | 0.005249 |
| TMED7-TIC | -0.14276 | 0.057302 | 0.107493 |
| TMED7     | -0.17175 | 0.021882 | 0.047849 |
| TMED8     | -0.43305 | 1.57E-09 | 3.12E-08 |
| TMED9     | 0.118358 | 0.115603 | 0.191758 |
| TMEFF1    | -0.03142 | 0.677177 | 0.762774 |
| TMEFF2    | -0.16004 | 0.032843 | 0.067573 |
| TMEM100   | -0.10006 | 0.183863 | 0.27796  |
| TMEM101   | 0.204027 | 0.006301 | 0.016673 |
| TMEM102   | 0.298377 | 5.22E-05 | 0.000272 |
| TMEM104   | -0.21261 | 0.004382 | 0.012214 |
| TMEM105   | 0.498829 | 1.38E-12 | 6.22E-11 |
| TMEM106A  | 0.208098 | 0.005313 | 0.014426 |
| TMEM106B  | -0.17222 | 0.021525 | 0.047193 |
| TMEM106C  | -0.15915 | 0.033849 | 0.069302 |
| TMEM107   | -0.32046 | 1.30E-05 | 8.13E-05 |
| TMEM108   | -0.2166  | 0.003684 | 0.010536 |
| TMEM109   | 0.088472 | 0.240252 | 0.344581 |
| TMEM110   | -0.03831 | 0.611669 | 0.707277 |
| TMEM111   | 0.200107 | 0.007404 | 0.019121 |
| TMEM114   | 0.302926 | 3.96E-05 | 0.000214 |
| TMEM115   | 0.077049 | 0.306664 | 0.416969 |
| TMEM116   | -0.16272 | 0.029998 | 0.062663 |
| TMEM117   | -0.03652 | 0.628411 | 0.721238 |
| TMEM119   | 0.008942 | 0.9057   | 0.934236 |
| TMEM11    | -0.11935 | 0.112561 | 0.187876 |
| TMEM120A  | 0.360006 | 7.98E-07 | 7.15E-06 |

|          |          |          |          |
|----------|----------|----------|----------|
| TMEM120B | -0.12905 | 0.086023 | 0.150813 |
| TMEM121  | 0.025247 | 0.737993 | 0.810862 |
| TMEM123  | 0.293243 | 7.11E-05 | 0.000354 |
| TMEM125  | 0.058184 | 0.440436 | 0.552228 |
| TMEM126A | 0.299964 | 4.74E-05 | 0.000251 |
| TMEM126B | 0.214297 | 0.004074 | 0.011503 |
| TMEM127  | 0.20668  | 0.005641 | 0.015165 |
| TMEM128  | -0.06386 | 0.397053 | 0.509793 |
| TMEM129  | -0.08532 | 0.25751  | 0.363871 |
| TMEM130  | 0.072145 | 0.338569 | 0.450741 |
| TMEM131  | -0.24095 | 0.001196 | 0.004006 |
| TMEM132A | 0.179255 | 0.01666  | 0.038098 |
| TMEM132B | -0.22778 | 0.00223  | 0.006856 |
| TMEM132C | -0.01736 | 0.818102 | 0.87109  |
| TMEM132D | -0.26622 | 0.000328 | 0.001325 |
| TMEM132E | -0.02439 | 0.746623 | 0.817709 |
| TMEM133  | 0.412579 | 1.05E-08 | 1.64E-07 |
| TMEM134  | 0.433338 | 1.52E-09 | 3.04E-08 |
| TMEM135  | 0.067193 | 0.372843 | 0.485999 |
| TMEM136  | -0.00122 | 0.987124 | 0.990883 |
| TMEM138  | 0.244205 | 0.00102  | 0.003492 |
| TMEM139  | 0.579387 | 2.40E-17 | 3.51E-15 |
| TMEM140  | 0.057529 | 0.445611 | 0.55702  |
| TMEM141  | 0.33114  | 6.34E-06 | 4.37E-05 |
| TMEM143  | 0.07667  | 0.309059 | 0.419447 |
| TMEM144  | 0.289635 | 8.80E-05 | 0.000426 |
| TMEM145  | -0.28425 | 0.00012  | 0.000559 |
| TMEM146  | 0.015043 | 0.842027 | 0.888392 |
| TMEM147  | 0.081536 | 0.27927  | 0.387692 |
| TMEM149  | -0.0238  | 0.752541 | 0.822686 |
| TMEM14A  | -0.12825 | 0.087994 | 0.153641 |
| TMEM14B  | 0.048425 | 0.520938 | 0.626507 |
| TMEM14C  | 0.224277 | 0.002616 | 0.007858 |
| TMEM14E  | -0.06909 | 0.359444 | 0.472488 |
| TMEM150A | 0.100004 | 0.184126 | 0.278293 |
| TMEM150B | 0.289013 | 9.13E-05 | 0.000439 |
| TMEM150C | -0.3227  | 1.12E-05 | 7.17E-05 |
| TMEM151A | -0.083   | 0.270685 | 0.378484 |
| TMEM151B | -0.25404 | 0.000622 | 0.002286 |
| TMEM154  | 0.508853 | 4.10E-13 | 2.11E-11 |
| TMEM155  | -0.12313 | 0.101548 | 0.172822 |
| TMEM156  | 0.00237  | 0.974956 | 0.982759 |
| TMEM158  | 0.283499 | 0.000126 | 0.000581 |
| TMEM159  | 0.439357 | 8.50E-10 | 1.85E-08 |
| TMEM160  | 0.17806  | 0.017411 | 0.039481 |
| TMEM161A | 0.144403 | 0.054468 | 0.103166 |
| TMEM161B | 0.074774 | 0.321211 | 0.433055 |
| TMEM163  | 0.065429 | 0.38555  | 0.498292 |
| TMEM164  | 0.011918 | 0.874541 | 0.913059 |
| TMEM165  | 0.256553 | 0.000547 | 0.002053 |
| TMEM167A | -0.22464 | 0.002574 | 0.00775  |
| TMEM167B | -0.09185 | 0.222686 | 0.324734 |
| TMEM168  | -0.14555 | 0.052556 | 0.100091 |
| TMEM169  | 0.078232 | 0.299281 | 0.409379 |

|           |          |          |          |
|-----------|----------|----------|----------|
| TMEM170A  | 0.074741 | 0.321423 | 0.433253 |
| TMEM170B  | -0.48888 | 4.40E-12 | 1.73E-10 |
| TMEM171   | 0.465667 | 5.76E-11 | 1.74E-09 |
| TMEM173   | 0.38314  | 1.30E-07 | 1.47E-06 |
| TMEM174   | 0.082491 | 0.273656 | 0.381747 |
| TMEM175   | -0.12945 | 0.085034 | 0.14945  |
| TMEM176A  | 0.057409 | 0.446561 | 0.557817 |
| TMEM176B  | 0.039625 | 0.599479 | 0.696173 |
| TMEM177   | 0.198939 | 0.007764 | 0.019906 |
| TMEM178   | 0.111496 | 0.138425 | 0.221511 |
| TMEM179B  | 0.398118 | 3.73E-08 | 4.90E-07 |
| TMEM179   | -0.30958 | 2.61E-05 | 0.000149 |
| TMEM17    | -0.15231 | 0.0424   | 0.083783 |
| TMEM180   | 0.374469 | 2.61E-07 | 2.71E-06 |
| TMEM181   | -0.11815 | 0.116249 | 0.192489 |
| TMEM182   | 0.192247 | 0.010145 | 0.025003 |
| TMEM183A  | 0.236717 | 0.001466 | 0.004773 |
| TMEM184A  | 0.198583 | 0.007877 | 0.020164 |
| TMEM184B  | 0.049192 | 0.514351 | 0.620358 |
| TMEM184C  | -0.15608 | 0.037487 | 0.075446 |
| TMEM185A  | 0.113811 | 0.13037  | 0.210961 |
| TMEM185B  | 0.165902 | 0.026886 | 0.05708  |
| TMEM186   | 0.100469 | 0.182085 | 0.275798 |
| TMEM187   | 0.01167  | 0.877131 | 0.914885 |
| TMEM188   | -0.0386  | 0.609011 | 0.704629 |
| TMEM189-U | 0.036475 | 0.628834 | 0.72164  |
| TMEM189   | 0.402778 | 2.49E-08 | 3.49E-07 |
| TMEM18    | 0.052885 | 0.483247 | 0.592383 |
| TMEM190   | 0.001145 | 0.987895 | 0.991388 |
| TMEM191A  | 0.182978 | 0.014497 | 0.033865 |
| TMEM192   | -0.36054 | 7.67E-07 | 6.92E-06 |
| TMEM194A  | -0.20848 | 0.005228 | 0.014223 |
| TMEM194B  | 0.221995 | 0.0029   | 0.008593 |
| TMEM195   | 0.386278 | 1.01E-07 | 1.17E-06 |
| TMEM196   | -0.24383 | 0.001039 | 0.003545 |
| TMEM198   | -0.32536 | 9.36E-06 | 6.14E-05 |
| TMEM199   | -0.16561 | 0.02716  | 0.057543 |
| TMEM19    | -0.08831 | 0.241119 | 0.345474 |
| TMEM200A  | -0.001   | 0.989453 | 0.992414 |
| TMEM200B  | 0.26708  | 0.000314 | 0.001275 |
| TMEM200C  | 0.011679 | 0.877041 | 0.914839 |
| TMEM201   | -0.33601 | 4.53E-06 | 3.26E-05 |
| TMEM202   | -0.08173 | 0.278106 | 0.386238 |
| TMEM203   | 0.018394 | 0.807468 | 0.863634 |
| TMEM204   | 0.095263 | 0.205912 | 0.305125 |
| TMEM205   | -0.03152 | 0.676215 | 0.762168 |
| TMEM206   | -0.02771 | 0.713528 | 0.79155  |
| TMEM207   | 0.016619 | 0.825736 | 0.876489 |
| TMEM208   | 0.132757 | 0.077305 | 0.13815  |
| TMEM209   | -0.37668 | 2.19E-07 | 2.32E-06 |
| TMEM20    | -0.25986 | 0.00046  | 0.001768 |
| TMEM211   | -0.05435 | 0.47121  | 0.58123  |
| TMEM212   | -0.07906 | 0.29418  | 0.404079 |
| TMEM213   | 0.058871 | 0.435049 | 0.546582 |

|          |          |          |          |
|----------|----------|----------|----------|
| TMEM214  | 0.123018 | 0.101857 | 0.173258 |
| TMEM215  | 0.067215 | 0.372689 | 0.48583  |
| TMEM216  | 0.280493 | 0.000149 | 0.000673 |
| TMEM217  | -0.00961 | 0.898676 | 0.929269 |
| TMEM218  | -0.04874 | 0.51827  | 0.624133 |
| TMEM219  | 0.388844 | 8.15E-08 | 9.77E-07 |
| TMEM220  | -0.27099 | 0.000253 | 0.001061 |
| TMEM222  | 0.079813 | 0.28959  | 0.399077 |
| TMEM223  | 0.389829 | 7.50E-08 | 9.09E-07 |
| TMEM229A | -0.24011 | 0.001245 | 0.004153 |
| TMEM229B | -0.19601 | 0.008738 | 0.022006 |
| TMEM22   | -0.15294 | 0.041535 | 0.082272 |
| TMEM231  | -0.31331 | 2.06E-05 | 0.000121 |
| TMEM232  | -0.2806  | 0.000148 | 0.00067  |
| TMEM233  | -0.11785 | 0.117174 | 0.193706 |
| TMEM25   | -0.19355 | 0.009637 | 0.023931 |
| TMEM26   | 0.113174 | 0.132548 | 0.213837 |
| TMEM27   | -0.19181 | 0.010321 | 0.025358 |
| TMEM2    | 0.157266 | 0.03604  | 0.073065 |
| TMEM30A  | -0.37351 | 2.82E-07 | 2.89E-06 |
| TMEM30B  | 0.241602 | 0.001158 | 0.0039   |
| TMEM31   | 0.053432 | 0.478722 | 0.588332 |
| TMEM33   | 0.00573  | 0.939487 | 0.959131 |
| TMEM35   | 0.085458 | 0.256713 | 0.363156 |
| TMEM37   | 0.257203 | 0.000529 | 0.001992 |
| TMEM38A  | 0.175546 | 0.019088 | 0.042684 |
| TMEM38B  | -0.52139 | 8.52E-14 | 5.12E-12 |
| TMEM39A  | -0.13778 | 0.066655 | 0.122073 |
| TMEM39B  | -0.2632  | 0.000386 | 0.001522 |
| TMEM40   | 0.418116 | 6.35E-09 | 1.07E-07 |
| TMEM41A  | 0.370652 | 3.53E-07 | 3.52E-06 |
| TMEM41B  | 0.28065  | 0.000148 | 0.000668 |
| TMEM42   | 0.156378 | 0.037116 | 0.074845 |
| TMEM43   | 0.370277 | 3.63E-07 | 3.61E-06 |
| TMEM44   | 0.514203 | 2.11E-13 | 1.16E-11 |
| TMEM45A  | 0.085556 | 0.256164 | 0.362538 |
| TMEM45B  | 0.298911 | 5.06E-05 | 0.000265 |
| TMEM47   | 0.177191 | 0.017976 | 0.040567 |
| TMEM48   | 0.169109 | 0.024034 | 0.051878 |
| TMEM49   | 0.481823 | 9.82E-12 | 3.52E-10 |
| TMEM50A  | 0.361045 | 7.38E-07 | 6.70E-06 |
| TMEM50B  | 0.05103  | 0.49874  | 0.606152 |
| TMEM51   | 0.25676  | 0.000541 | 0.002034 |
| TMEM52   | -0.02397 | 0.750786 | 0.821085 |
| TMEM53   | 0.157431 | 0.035843 | 0.072739 |
| TMEM54   | 0.446473 | 4.20E-10 | 9.95E-09 |
| TMEM55A  | -0.17941 | 0.016565 | 0.037898 |
| TMEM55B  | -0.04224 | 0.575605 | 0.67493  |
| TMEM56   | -0.25645 | 0.00055  | 0.002062 |
| TMEM57   | -0.27356 | 0.00022  | 0.000939 |
| TMEM59L  | -0.24562 | 0.000951 | 0.003288 |
| TMEM59   | -0.05785 | 0.443099 | 0.554863 |
| TMEM5    | -0.45405 | 1.95E-10 | 5.06E-09 |
| TMEM60   | -0.12846 | 0.087484 | 0.152914 |

|           |          |          |          |
|-----------|----------|----------|----------|
| TMEM61    | -0.18238 | 0.014824 | 0.034491 |
| TMEM62    | 0.377864 | 1.99E-07 | 2.14E-06 |
| TMEM63A   | 0.339376 | 3.58E-06 | 2.66E-05 |
| TMEM63B   | 0.321636 | 1.20E-05 | 7.60E-05 |
| TMEM63C   | -0.26695 | 0.000316 | 0.001282 |
| TMEM64    | -0.31621 | 1.71E-05 | 0.000103 |
| TMEM65    | -0.14988 | 0.045842 | 0.089387 |
| TMEM66    | -0.33202 | 5.97E-06 | 4.16E-05 |
| TMEM67    | -0.27007 | 0.000267 | 0.001109 |
| TMEM68    | -0.08415 | 0.26407  | 0.371335 |
| TMEM69    | 0.072964 | 0.333099 | 0.445348 |
| TMEM70    | -0.34192 | 2.99E-06 | 2.27E-05 |
| TMEM71    | -0.00706 | 0.925487 | 0.948511 |
| TMEM72    | -0.36475 | 5.57E-07 | 5.24E-06 |
| TMEM74    | -0.3062  | 3.23E-05 | 0.00018  |
| TMEM79    | 0.29243  | 7.47E-05 | 0.000368 |
| TMEM80    | -0.11625 | 0.122282 | 0.200211 |
| TMEM81    | 0.149716 | 0.046081 | 0.089738 |
| TMEM82    | 0.298846 | 5.08E-05 | 0.000266 |
| TMEM84    | -0.19407 | 0.009439 | 0.023502 |
| TMEM85    | 0.195378 | 0.008961 | 0.022458 |
| TMEM86A   | 0.055374 | 0.462866 | 0.57316  |
| TMEM86B   | -0.09497 | 0.207328 | 0.306681 |
| TMEM87A   | 0.366887 | 4.72E-07 | 4.53E-06 |
| TMEM87B   | 0.214318 | 0.00407  | 0.011498 |
| TMEM88B   | 0.045849 | 0.543382 | 0.646384 |
| TMEM88    | -0.27764 | 0.000175 | 0.000773 |
| TMEM89    | -0.20111 | 0.007106 | 0.018446 |
| TMEM8A    | 0.164283 | 0.028432 | 0.059815 |
| TMEM8B    | -0.23502 | 0.00159  | 0.005128 |
| TMEM8C    | -0.06011 | 0.425439 | 0.53772  |
| TMEM90A   | -0.06397 | 0.396244 | 0.508986 |
| TMEM90B   | 0.009094 | 0.90411  | 0.933083 |
| TMEM91    | 0.06673  | 0.376156 | 0.489059 |
| TMEM92    | 0.630163 | 4.33E-21 | 1.83E-18 |
| TMEM93    | 0.023542 | 0.755104 | 0.824622 |
| TMEM95    | 0.08785  | 0.243587 | 0.348253 |
| TMEM97    | 0.065112 | 0.387865 | 0.500596 |
| TMEM98    | 0.115862 | 0.123538 | 0.201888 |
| TMEM99    | -0.01951 | 0.796071 | 0.856072 |
| TMEM9B    | 0.168644 | 0.024431 | 0.052614 |
| TMEM9     | -0.07411 | 0.325551 | 0.437624 |
| TMF1      | -0.15111 | 0.044075 | 0.086548 |
| TMIE      | 0.134873 | 0.072659 | 0.131222 |
| TMIGD1    | -0.19333 | 0.009719 | 0.024102 |
| TMIGD2    | 0.066464 | 0.378062 | 0.490763 |
| TMLHE     | 0.013692 | 0.856059 | 0.899644 |
| TMOD1     | -0.32766 | 8.02E-06 | 5.35E-05 |
| TMOD2     | -0.4227  | 4.16E-09 | 7.42E-08 |
| TMOD3     | 0.348397 | 1.88E-06 | 1.51E-05 |
| TMOD4     | 0.048143 | 0.523372 | 0.62886  |
| TMPO      | -0.19271 | 0.009963 | 0.024627 |
| TMPPE     | 0.054943 | 0.466362 | 0.576473 |
| TMPRSS11A | 0.092181 | 0.221029 | 0.322914 |



TMPRSS11E 0.009033 0.904748 0.933547  
TMPRSS11E 0.126485 0.092491 0.159954  
TMPRSS11I 0.165698 0.027077 0.057395  
TMPRSS11F 0.104131 0.166584 0.25709  
TMPRSS12 -0.12732 0.090345 0.156888  
TMPRSS13 0.104742 0.1641 0.254006  
TMPRSS15 0.038665 0.608365 0.704116  
TMPRSS2 0.261453 0.000423 0.001647  
TMPRSS3 0.433521 1.50E-09 2.99E-08  
TMPRSS4 0.620123 2.70E-20 8.34E-18  
TMPRSS5 0.198397 0.007937 0.020301  
TMPRSS6 -0.23579 0.001532 0.004962  
TMPRSS7 0.109331 0.146297 0.231653  
TMPRSS9 -0.16829 0.024735 0.053159  
TMSB10 0.538139 9.43E-15 6.96E-13  
TMSB15A -0.04061 0.590426 0.688348  
TMSB15B 0.114716 0.127319 0.206972  
TMSB4Y -0.12405 0.098983 0.169123  
TMSL3 0.467941 4.52E-11 1.41E-09  
TMTC1 -0.3826 1.36E-07 1.52E-06  
TMTC2 0.078054 0.300382 0.41052  
TMTC3 -0.25615 0.000558 0.002088  
TMTC4 0.118552 0.115002 0.190944  
TMUB1 0.202347 0.006755 0.017715  
TMUB2 0.367808 4.40E-07 4.25E-06  
TMX1 -0.09095 0.227284 0.329897  
TMX2 0.114626 0.12762 0.207359  
TMX3 -0.38893 8.09E-08 9.72E-07  
TMX4 -0.52442 5.78E-14 3.61E-12  
TNC 0.017885 0.812693 0.867339  
TNFAIP1 0.18066 0.015812 0.036434  
TNFAIP2 0.448674 3.36E-10 8.26E-09  
TNFAIP3 -0.07671 0.308827 0.419247  
TNFAIP6 0.20042 0.00731 0.018906  
TNFAIP8L1 0.153893 0.040271 0.080186  
TNFAIP8L2 0.051933 0.49117 0.599752  
TNFAIP8L3 -0.12907 0.085971 0.150763  
TNFAIP8 0.241504 0.001164 0.003914  
TNFRSF10A 0.425147 3.31E-09 6.05E-08  
TNFRSF10E 0.516703 1.54E-13 8.78E-12  
TNFRSF10C 0.208889 0.005138 0.014018  
TNFRSF10I 0.310201 2.51E-05 0.000144  
TNFRSF11A 0.220154 0.003149 0.009201  
TNFRSF11E 0.143388 0.056206 0.105891  
TNFRSF12A 0.546312 3.08E-15 2.50E-13  
TNFRSF13E -0.00906 0.904451 0.933383  
TNFRSF13C 0.023499 0.755532 0.824998  
TNFRSF14 0.366662 4.81E-07 4.59E-06  
TNFRSF17 0.017223 0.8195 0.87224  
TNFRSF18 0.226826 0.002329 0.007114  
TNFRSF19 -0.07551 0.316448 0.427801  
TNFRSF1A 0.27075 0.000257 0.001073  
TNFRSF1B 0.055237 0.463973 0.57413  
TNFRSF21 0.506259 5.63E-13 2.78E-11

|           |          |          |          |
|-----------|----------|----------|----------|
| TNFRSF25  | 0.216793 | 0.003653 | 0.010462 |
| TNFRSF4   | 0.177111 | 0.018029 | 0.040664 |
| TNFRSF6B  | 0.408145 | 1.56E-08 | 2.30E-07 |
| TNFRSF8   | 0.026744 | 0.723072 | 0.79895  |
| TNFRSF9   | 0.07854  | 0.297372 | 0.407331 |
| TNFSF10   | 0.333271 | 5.48E-06 | 3.86E-05 |
| TNFSF11   | 0.427484 | 2.66E-09 | 4.97E-08 |
| TNFSF12-1 | 0.172198 | 0.021538 | 0.047201 |
| TNFSF12   | 0.120799 | 0.108231 | 0.182126 |
| TNFSF13B  | 0.09658  | 0.199683 | 0.297442 |
| TNFSF13   | 0.292645 | 7.37E-05 | 0.000365 |
| TNFSF14   | 0.008536 | 0.909965 | 0.937023 |
| TNFSF15   | -0.04746 | 0.529267 | 0.633768 |
| TNFSF18   | -0.03417 | 0.650689 | 0.739722 |
| TNFSF4    | 0.130571 | 0.08235  | 0.145625 |
| TNFSF8    | -0.10485 | 0.163677 | 0.253564 |
| TNFSF9    | 0.424282 | 3.59E-09 | 6.52E-08 |
| TNF       | 0.058755 | 0.435954 | 0.547406 |
| TNIK      | 0.254854 | 0.000597 | 0.002208 |
| TNIP1     | 0.419728 | 5.48E-09 | 9.37E-08 |
| TNIP2     | 0.340735 | 3.26E-06 | 2.45E-05 |
| TNIP3     | -0.19453 | 0.009268 | 0.023125 |
| TNK1      | 0.286048 | 0.000109 | 0.00051  |
| TNK2      | 0.522692 | 7.21E-14 | 4.39E-12 |
| TNKS1BP1  | 0.482994 | 8.61E-12 | 3.15E-10 |
| TNKS2     | -0.25354 | 0.000638 | 0.002335 |
| TNKS      | -0.33991 | 3.45E-06 | 2.57E-05 |
| TNMD      | -0.19974 | 0.007515 | 0.019368 |
| TNNC1     | 0.342955 | 2.78E-06 | 2.13E-05 |
| TNNC2     | 0.35372  | 1.28E-06 | 1.07E-05 |
| TNNI1     | 0.30467  | 3.55E-05 | 0.000195 |
| TNNI2     | 0.478354 | 1.45E-11 | 4.95E-10 |
| TNNI3K    | -0.11043 | 0.142274 | 0.226461 |
| TNNI3     | 0.23509  | 0.001584 | 0.005111 |
| TNNT1     | 0.400895 | 2.93E-08 | 3.98E-07 |
| TNNT2     | 0.463085 | 7.58E-11 | 2.20E-09 |
| TNNT3     | -0.17546 | 0.01915  | 0.042806 |
| TNN       | -0.00582 | 0.9385   | 0.95842  |
| TNP1      | -0.13228 | 0.078378 | 0.139815 |
| TNP2      | -0.12609 | 0.093535 | 0.161379 |
| TNP01     | -0.32067 | 1.28E-05 | 8.03E-05 |
| TNP02     | -0.27597 | 0.000193 | 0.000837 |
| TNP03     | -0.08328 | 0.269095 | 0.376714 |
| TNRC18    | 0.042029 | 0.577505 | 0.676676 |
| TNRC6A    | -0.28382 | 0.000123 | 0.000571 |
| TNRC6B    | -0.3523  | 1.42E-06 | 1.17E-05 |
| TNRC6C    | -0.33198 | 5.98E-06 | 4.17E-05 |
| TNR       | -0.39321 | 5.66E-08 | 7.08E-07 |
| TNS1      | 0.010043 | 0.894158 | 0.926196 |
| TNS3      | -0.29754 | 5.50E-05 | 0.000284 |
| TNS4      | 0.56708  | 1.56E-16 | 1.81E-14 |
| TNXB      | -0.14715 | 0.049987 | 0.095946 |
| TOB1      | 0.355003 | 1.16E-06 | 9.87E-06 |
| TOB2      | 0.045922 | 0.542737 | 0.64581  |

|          |          |          |          |
|----------|----------|----------|----------|
| TOE1     | -0.07379 | 0.327622 | 0.439512 |
| TOLLIP   | -0.26092 | 0.000435 | 0.001689 |
| TOM1L1   | 0.079773 | 0.289832 | 0.399327 |
| TOM1L2   | -0.45105 | 2.64E-10 | 6.63E-09 |
| TOM1     | 0.164338 | 0.028378 | 0.059732 |
| TOMM20L  | -0.16354 | 0.029171 | 0.061164 |
| TOMM20   | 0.107111 | 0.154716 | 0.242401 |
| TOMM22   | 0.130856 | 0.081679 | 0.144723 |
| TOMM34   | 0.135606 | 0.071104 | 0.128945 |
| TOMM40L  | 0.190981 | 0.010662 | 0.026095 |
| TOMM40   | 0.173071 | 0.020875 | 0.046017 |
| TOMM5    | -0.00543 | 0.942664 | 0.961528 |
| TOMM6    | 0.048243 | 0.522513 | 0.628095 |
| TOMM70A  | -0.1617  | 0.031055 | 0.064485 |
| TOMM7    | -0.11502 | 0.126324 | 0.205692 |
| TOP1MT   | 0.347856 | 1.96E-06 | 1.56E-05 |
| TOP1P1   | 0.071579 | 0.342378 | 0.454619 |
| TOP1P2   | 0.173243 | 0.020746 | 0.045784 |
| TOP1     | -0.00116 | 0.987772 | 0.991382 |
| TOP2A    | 0.331498 | 6.18E-06 | 4.29E-05 |
| TOP2B    | -0.27005 | 0.000267 | 0.00111  |
| TOP3A    | -0.47121 | 3.17E-11 | 1.02E-09 |
| TOP3B    | 0.09781  | 0.193988 | 0.290533 |
| TOPBP1   | -0.01875 | 0.80385  | 0.861571 |
| TOPORS   | -0.32108 | 1.24E-05 | 7.85E-05 |
| TOR1AIP1 | -0.18036 | 0.015992 | 0.036791 |
| TOR1AIP2 | -0.11937 | 0.112492 | 0.187826 |
| TOR1A    | -0.24879 | 0.000812 | 0.002883 |
| TOR1B    | -0.06419 | 0.394635 | 0.507314 |
| TOR2A    | -0.15608 | 0.037484 | 0.075446 |
| TOR3A    | 0.115915 | 0.123364 | 0.201653 |
| TOX2     | -0.11861 | 0.114824 | 0.190705 |
| TOX3     | 0.120722 | 0.108457 | 0.182429 |
| TOX4     | -0.03318 | 0.660171 | 0.748651 |
| TOX      | -0.43106 | 1.90E-09 | 3.68E-08 |
| TP53AIP1 | 0.020253 | 0.788445 | 0.850047 |
| TP53BP1  | -0.20886 | 0.005145 | 0.014033 |
| TP53BP2  | 0.165881 | 0.026905 | 0.057109 |
| TP53I11  | 0.273787 | 0.000217 | 0.000929 |
| TP53I13  | 0.008891 | 0.906241 | 0.934599 |
| TP53I3   | 0.522293 | 7.59E-14 | 4.58E-12 |
| TP53INP1 | -0.41427 | 9.00E-09 | 1.45E-07 |
| TP53INP2 | -0.18666 | 0.012606 | 0.030108 |
| TP53RK   | -0.07473 | 0.321528 | 0.433335 |
| TP53TG1  | 0.175143 | 0.01937  | 0.043206 |
| TP53TG3B | -0.19498 | 0.009103 | 0.022755 |
| TP53TG5  | -0.04622 | 0.540098 | 0.64329  |
| TP53     | -0.00997 | 0.894891 | 0.926588 |
| TP63     | 0.319849 | 1.35E-05 | 8.41E-05 |
| TP73     | 0.297261 | 5.59E-05 | 0.000288 |
| TPBG     | 0.405228 | 2.01E-08 | 2.88E-07 |
| TPCN1    | -0.38616 | 1.02E-07 | 1.18E-06 |
| TPCN2    | -0.07088 | 0.347103 | 0.459566 |
| TPD52L1  | 0.26723  | 0.000311 | 0.001266 |

|          |          |          |          |
|----------|----------|----------|----------|
| TPD52L2  | 0.171165 | 0.022347 | 0.048736 |
| TPD52L3  | 0.121469 | 0.106273 | 0.179488 |
| TPD52    | -0.16132 | 0.031464 | 0.065162 |
| TPH1     | -0.43601 | 1.18E-09 | 2.43E-08 |
| TPH2     | -0.32946 | 7.10E-06 | 4.82E-05 |
| TPI1P2   | -0.32085 | 1.26E-05 | 7.95E-05 |
| TPI1P3   | 0.079773 | 0.289832 | 0.399327 |
| TPI1     | 0.155117 | 0.03869  | 0.077474 |
| TPK1     | 0.053488 | 0.478264 | 0.587925 |
| TPM1     | 0.223926 | 0.002658 | 0.007961 |
| TPM2     | 0.326137 | 8.89E-06 | 5.86E-05 |
| TPM3     | 0.336824 | 4.28E-06 | 3.11E-05 |
| TPM4     | 0.469908 | 3.65E-11 | 1.16E-09 |
| TPMT     | 0.060912 | 0.419271 | 0.531487 |
| TPO      | -0.18621 | 0.012825 | 0.030543 |
| TPP1     | -0.20656 | 0.00567  | 0.015235 |
| TPP2     | -0.05017 | 0.505983 | 0.612897 |
| TPPP2    | -0.01085 | 0.885704 | 0.920477 |
| TPPP3    | -0.06918 | 0.358846 | 0.472016 |
| TPPP     | -0.3187  | 1.45E-05 | 8.98E-05 |
| TPRA1    | 0.265677 | 0.000338 | 0.001358 |
| TPRG1L   | 0.142336 | 0.058055 | 0.108628 |
| TPRG1    | 0.456333 | 1.54E-10 | 4.11E-09 |
| TPRKB    | 0.160522 | 0.032319 | 0.066689 |
| TPRN     | 0.00784  | 0.917282 | 0.942496 |
| TPRX1    | 0.034744 | 0.645221 | 0.735409 |
| TPRXL    | 0.312191 | 2.21E-05 | 0.000129 |
| TPR      | 0.065878 | 0.382295 | 0.495088 |
| TPSAB1   | 0.112389 | 0.135272 | 0.217513 |
| TPSB2    | 0.060271 | 0.424185 | 0.536478 |
| TPSD1    | -0.10798 | 0.151378 | 0.238097 |
| TPSG1    | -0.17904 | 0.016791 | 0.038305 |
| TPST1    | -0.29328 | 7.10E-05 | 0.000353 |
| TPST2    | -0.14834 | 0.048136 | 0.093045 |
| TPT1     | 0.128969 | 0.086216 | 0.151098 |
| TPTE2P1  | 0.06244  | 0.407675 | 0.519887 |
| TPTE2P3  | -0.03897 | 0.605498 | 0.701577 |
| TPTE2    | -0.04662 | 0.536613 | 0.640103 |
| TPTE     | -0.23087 | 0.001932 | 0.006056 |
| TPX2     | 0.385545 | 1.07E-07 | 1.23E-06 |
| TRA2A    | 0.108413 | 0.149736 | 0.23604  |
| TRA2B    | -0.04444 | 0.555894 | 0.657352 |
| TRABD    | 0.323733 | 1.04E-05 | 6.75E-05 |
| TRADD    | 0.541829 | 5.71E-15 | 4.43E-13 |
| TRAF1    | -0.05416 | 0.472783 | 0.582662 |
| TRAF2    | 0.183118 | 0.014421 | 0.033714 |
| TRAF3IP1 | 0.049522 | 0.511534 | 0.61779  |
| TRAF3IP2 | -0.19555 | 0.008898 | 0.022315 |
| TRAF3IP3 | 0.008306 | 0.912379 | 0.938727 |
| TRAF3    | -0.10896 | 0.14768  | 0.233301 |
| TRAF4    | 0.529704 | 2.90E-14 | 1.93E-12 |
| TRAF5    | 0.179102 | 0.016754 | 0.038251 |
| TRAF6    | 0.013934 | 0.85354  | 0.897618 |
| TRAF7    | 0.195604 | 0.008881 | 0.022285 |

|           |          |          |          |
|-----------|----------|----------|----------|
| TRAFD1    | 0.033137 | 0.660582 | 0.749031 |
| TRAIIP    | 0.226926 | 0.002318 | 0.007086 |
| TRAK1     | 0.446577 | 4.15E-10 | 9.87E-09 |
| TRAK2     | -0.17442 | 0.019884 | 0.044228 |
| TRAMIL1   | -0.20742 | 0.005469 | 0.014762 |
| TRAM1     | 0.098428 | 0.191172 | 0.286969 |
| TRAM2     | -0.32868 | 7.49E-06 | 5.05E-05 |
| TRANK1    | 0.01062  | 0.888117 | 0.922305 |
| TRAP1     | 0.093053 | 0.216673 | 0.317959 |
| TRAPPC10  | -0.0518  | 0.492291 | 0.600899 |
| TRAPPC1   | -0.02907 | 0.700061 | 0.780855 |
| TRAPPC2L  | 0.227646 | 0.002243 | 0.006892 |
| TRAPPC2P1 | 0.259734 | 0.000463 | 0.001777 |
| TRAPPC2   | 0.082988 | 0.270767 | 0.378572 |
| TRAPPC3   | 0.108736 | 0.148516 | 0.234397 |
| TRAPPC4   | 0.102753 | 0.172299 | 0.264132 |
| TRAPPC5   | 0.193406 | 0.009692 | 0.024056 |
| TRAPPC6A  | 0.394955 | 4.88E-08 | 6.26E-07 |
| TRAPPC6B  | 0.077338 | 0.304851 | 0.415332 |
| TRAPPC9   | -0.11825 | 0.115926 | 0.192148 |
| TRAT1     | -0.1141  | 0.129403 | 0.209702 |
| TRDMT1    | -0.35584 | 1.09E-06 | 9.38E-06 |
| TRDN      | -0.15937 | 0.033598 | 0.068889 |
| TREH      | 0.096795 | 0.198676 | 0.296253 |
| TREM1     | 0.379285 | 1.78E-07 | 1.94E-06 |
| TREM2     | 0.265551 | 0.00034  | 0.001366 |
| TREML1    | -0.02111 | 0.779753 | 0.843311 |
| TREML2P1  | 0.089393 | 0.235373 | 0.339306 |
| TREML2    | 0.060044 | 0.425938 | 0.53811  |
| TREML3    | 0.260349 | 0.000449 | 0.001732 |
| TREML4    | 0.012696 | 0.866422 | 0.907545 |
| TRERF1    | 0.214318 | 0.00407  | 0.011498 |
| TREX1     | 0.173007 | 0.020923 | 0.046113 |
| TREX2     | 0.149178 | 0.046879 | 0.091033 |
| TRHDE     | -0.0644  | 0.393062 | 0.505752 |
| TRHR      | -0.08882 | 0.238395 | 0.342519 |
| TRH       | -0.01399 | 0.852971 | 0.897166 |
| TRIAP1    | -0.03105 | 0.680736 | 0.765388 |
| TRIB1     | 0.168341 | 0.024692 | 0.053088 |
| TRIB2     | 0.353623 | 1.29E-06 | 1.08E-05 |
| TRIB3     | -0.12865 | 0.086995 | 0.152274 |
| TRIL      | -0.05281 | 0.483831 | 0.592953 |
| TRIM10    | 0.376278 | 2.26E-07 | 2.39E-06 |
| TRIM11    | 0.313651 | 2.01E-05 | 0.000119 |
| TRIM13    | 0.09378  | 0.213089 | 0.313631 |
| TRIM14    | 0.343402 | 2.70E-06 | 2.07E-05 |
| TRIM15    | 0.474138 | 2.31E-11 | 7.56E-10 |
| TRIM16L   | 0.169945 | 0.023336 | 0.050613 |
| TRIM16    | 0.573614 | 5.82E-17 | 7.88E-15 |
| TRIM17    | 0.189034 | 0.011501 | 0.02783  |
| TRIM21    | 0.403018 | 2.44E-08 | 3.43E-07 |
| TRIM22    | 0.174489 | 0.019834 | 0.044127 |
| TRIM23    | -0.35344 | 1.30E-06 | 1.09E-05 |
| TRIM24    | -0.3744  | 2.63E-07 | 2.72E-06 |

|           |          |          |          |
|-----------|----------|----------|----------|
| TRIM25    | -0.24264 | 0.001101 | 0.003731 |
| TRIM26    | 0.205303 | 0.005975 | 0.015928 |
| TRIM27    | -0.05746 | 0.446125 | 0.557487 |
| TRIM28    | 0.099944 | 0.184391 | 0.278599 |
| TRIM29    | 0.682316 | 9.94E-26 | 1.40E-22 |
| TRIM2     | -0.12366 | 0.10007  | 0.170716 |
| TRIM31    | 0.515794 | 1.73E-13 | 9.76E-12 |
| TRIM32    | -0.07369 | 0.328281 | 0.440216 |
| TRIM33    | -0.17695 | 0.018137 | 0.040868 |
| TRIM34    | 0.355649 | 1.11E-06 | 9.48E-06 |
| TRIM35    | -0.05402 | 0.4739   | 0.583711 |
| TRIM36    | -0.11147 | 0.13851  | 0.22163  |
| TRIM37    | -0.36556 | 5.23E-07 | 4.95E-06 |
| TRIM38    | 0.228438 | 0.002163 | 0.006681 |
| TRIM39    | -0.32936 | 7.15E-06 | 4.84E-05 |
| TRIM3     | -0.19199 | 0.010249 | 0.025212 |
| TRIM40    | 0.003384 | 0.964246 | 0.975694 |
| TRIM41    | 0.026374 | 0.726751 | 0.802119 |
| TRIM42    | -0.09107 | 0.226667 | 0.329276 |
| TRIM43    | -0.0577  | 0.444259 | 0.555893 |
| TRIM44    | -0.2144  | 0.004055 | 0.011463 |
| TRIM45    | 0.218467 | 0.003393 | 0.009804 |
| TRIM46    | -0.12085 | 0.10808  | 0.181949 |
| TRIM47    | 0.480328 | 1.16E-11 | 4.08E-10 |
| TRIM49L   | 0.096865 | 0.198349 | 0.295789 |
| TRIM49    | -0.09526 | 0.205921 | 0.305125 |
| TRIM4     | -0.12919 | 0.085678 | 0.150368 |
| TRIM50    | -0.08006 | 0.288122 | 0.397414 |
| TRIM52    | -0.05783 | 0.443245 | 0.554993 |
| TRIM53    | -0.06563 | 0.384121 | 0.496963 |
| TRIM54    | 0.578257 | 2.85E-17 | 4.03E-15 |
| TRIM55    | -0.12879 | 0.086662 | 0.151797 |
| TRIM56    | -0.11418 | 0.129118 | 0.209362 |
| TRIM58    | -0.30091 | 4.48E-05 | 0.000239 |
| TRIM59    | 0.277671 | 0.000175 | 0.000772 |
| TRIM5     | 0.308527 | 2.79E-05 | 0.000158 |
| TRIM6-TRI | 0.060065 | 0.425778 | 0.538045 |
| TRIM61    | -0.17159 | 0.022012 | 0.048106 |
| TRIM62    | -0.12279 | 0.102509 | 0.174187 |
| TRIM63    | -0.05764 | 0.44474  | 0.556266 |
| TRIM65    | 0.07945  | 0.291794 | 0.401386 |
| TRIM66    | -0.04096 | 0.58725  | 0.685697 |
| TRIM67    | -0.36751 | 4.50E-07 | 4.34E-06 |
| TRIM68    | -0.16228 | 0.030453 | 0.063462 |
| TRIM69    | 0.176787 | 0.018244 | 0.041069 |
| TRIM6     | 0.24246  | 0.001111 | 0.003758 |
| TRIM71    | -0.13034 | 0.08291  | 0.146419 |
| TRIM72    | -0.08597 | 0.253888 | 0.360065 |
| TRIM74    | -0.02586 | 0.731915 | 0.806154 |
| TRIM78P   | 0.214815 | 0.003983 | 0.011285 |
| TRIM7     | 0.492078 | 3.04E-12 | 1.24E-10 |
| TRIM8     | 0.358402 | 9.01E-07 | 7.92E-06 |
| TRIM9     | -0.33016 | 6.77E-06 | 4.62E-05 |
| TRIML1    | -0.07009 | 0.352512 | 0.465233 |

|          |          |          |          |
|----------|----------|----------|----------|
| TRIML2   | -0.09098 | 0.227156 | 0.329769 |
| TRIOBP   | 0.367493 | 4.51E-07 | 4.34E-06 |
| TRIO     | -0.15503 | 0.038803 | 0.077654 |
| TRIP10   | 0.690987 | 1.35E-26 | 2.43E-23 |
| TRIP11   | -0.22233 | 0.002856 | 0.008478 |
| TRIP12   | 0.0212   | 0.778796 | 0.842902 |
| TRIP13   | 0.239307 | 0.001295 | 0.004294 |
| TRIP4    | 0.276133 | 0.000191 | 0.000831 |
| TRIP6    | 0.608959 | 1.91E-19 | 5.04E-17 |
| TRIT1    | -0.12839 | 0.087637 | 0.15314  |
| TRMT112  | 0.305547 | 3.36E-05 | 0.000187 |
| TRMT11   | 0.182474 | 0.014775 | 0.034423 |
| TRMT12   | 0.040137 | 0.594774 | 0.692116 |
| TRMT1    | 0.179832 | 0.016307 | 0.037426 |
| TRMT2A   | 0.05484  | 0.467198 | 0.577327 |
| TRMT2B   | -0.11671 | 0.12079  | 0.198315 |
| TRMT5    | -0.12496 | 0.096522 | 0.165709 |
| TRMT61A  | 0.217953 | 0.003471 | 0.009996 |
| TRMT61B  | 0.023842 | 0.752085 | 0.822278 |
| TRMT6    | -0.10832 | 0.15009  | 0.23639  |
| TRMU     | -0.17291 | 0.020994 | 0.046259 |
| TRNAU1AP | 0.202983 | 0.00658  | 0.017318 |
| TRNP1    | 0.357688 | 9.50E-07 | 8.29E-06 |
| TRNT1    | 0.2446   | 0.001    | 0.003434 |
| TROAP    | 0.299988 | 4.74E-05 | 0.000251 |
| TROVE2   | 0.018857 | 0.80272  | 0.860978 |
| TRO      | -0.25565 | 0.000573 | 0.002136 |
| TRPA1    | -0.14616 | 0.051568 | 0.098561 |
| TRPC1    | -0.14777 | 0.049022 | 0.094415 |
| TRPC2    | 0.217652 | 0.003518 | 0.010116 |
| TRPC3    | 0.059216 | 0.432354 | 0.544165 |
| TRPC4AP  | -0.05526 | 0.463749 | 0.573997 |
| TRPC4    | -0.23031 | 0.001983 | 0.00619  |
| TRPC5    | -0.17677 | 0.018254 | 0.041087 |
| TRPC6    | -0.1398  | 0.062717 | 0.115903 |
| TRPC7    | -0.30679 | 3.11E-05 | 0.000174 |
| TRPM1    | -0.0516  | 0.493939 | 0.602204 |
| TRPM2    | -0.0351  | 0.641844 | 0.732869 |
| TRPM3    | -0.25486 | 0.000597 | 0.002208 |
| TRPM4    | 0.548868 | 2.16E-15 | 1.81E-13 |
| TRPM5    | 0.08882  | 0.238404 | 0.342519 |
| TRPM6    | -0.35754 | 9.61E-07 | 8.37E-06 |
| TRPM7    | -0.2012  | 0.007079 | 0.018402 |
| TRPM8    | 0.220153 | 0.003149 | 0.009201 |
| TRPS1    | 0.147321 | 0.049718 | 0.095532 |
| TRPT1    | 0.236377 | 0.00149  | 0.00484  |
| TRPV1    | -0.03937 | 0.601842 | 0.698159 |
| TRPV2    | 0.136544 | 0.069153 | 0.125962 |
| TRPV3    | 0.084458 | 0.262342 | 0.369273 |
| TRPV4    | 0.372238 | 3.11E-07 | 3.17E-06 |
| TRPV5    | -0.06667 | 0.376565 | 0.489366 |
| TRPV6    | 0.193943 | 0.009487 | 0.023607 |
| TRRAP    | -0.31446 | 1.91E-05 | 0.000114 |
| TRUB1    | -0.32346 | 1.06E-05 | 6.85E-05 |

|           |          |          |          |
|-----------|----------|----------|----------|
| TRUB2     | -0.02247 | 0.765925 | 0.833309 |
| TRY6      | -0.06274 | 0.405423 | 0.51797  |
| TRYX3     | -0.05573 | 0.459974 | 0.570431 |
| TSC1      | -0.2747  | 0.000207 | 0.00089  |
| TSC22D1   | 0.210822 | 0.004732 | 0.013071 |
| TSC22D2   | 0.114289 | 0.128752 | 0.208907 |
| TSC22D3   | 0.092682 | 0.218521 | 0.320077 |
| TSC22D4   | 0.238193 | 0.001366 | 0.004491 |
| TSC2      | -0.08107 | 0.282059 | 0.390713 |
| TSEN15    | 0.132193 | 0.07858  | 0.140074 |
| TSEN2     | 0.067421 | 0.371223 | 0.484334 |
| TSEN34    | 0.073077 | 0.332347 | 0.444553 |
| TSEN54    | 0.060665 | 0.421161 | 0.533336 |
| TSFM      | -0.18325 | 0.01435  | 0.033561 |
| TSG101    | 0.325944 | 9.00E-06 | 5.92E-05 |
| TSG1      | -0.18948 | 0.011304 | 0.027426 |
| TSGA10IP  | 0.118282 | 0.115837 | 0.192064 |
| TSGA10    | -0.16757 | 0.025368 | 0.054283 |
| TSGA13    | -0.22444 | 0.002597 | 0.007808 |
| TSGA14    | -0.38658 | 9.83E-08 | 1.15E-06 |
| TSHB      | -0.29954 | 4.87E-05 | 0.000257 |
| TSHR      | -0.23621 | 0.001502 | 0.004874 |
| TSHZ1     | -0.46428 | 6.68E-11 | 1.97E-09 |
| TSHZ2     | -0.05623 | 0.455964 | 0.566916 |
| TSHZ3     | -0.07791 | 0.301247 | 0.4114   |
| TSIX      | 0.080666 | 0.28445  | 0.393364 |
| TSKS      | 0.145867 | 0.052039 | 0.099269 |
| TSKU      | 0.457902 | 1.31E-10 | 3.57E-09 |
| TSLP      | 0.095335 | 0.205567 | 0.304691 |
| TSNARE1   | 0.148061 | 0.048571 | 0.093701 |
| TSNAX-DIS | 0.114142 | 0.129247 | 0.209503 |
| TSNAXIP1  | -0.17281 | 0.021074 | 0.046406 |
| TSNAX     | -0.24724 | 0.000877 | 0.003074 |
| TSN       | 0.067436 | 0.371114 | 0.484224 |
| TSPAN10   | 0.126448 | 0.092589 | 0.160081 |
| TSPAN11   | -0.18174 | 0.015185 | 0.035201 |
| TSPAN12   | -0.23948 | 0.001284 | 0.004265 |
| TSPAN13   | -0.11418 | 0.129104 | 0.209357 |
| TSPAN14   | 0.334847 | 4.91E-06 | 3.50E-05 |
| TSPAN15   | 0.498129 | 1.49E-12 | 6.70E-11 |
| TSPAN16   | -0.01675 | 0.82441  | 0.875739 |
| TSPAN17   | 0.278833 | 0.000164 | 0.00073  |
| TSPAN18   | 0.049764 | 0.509466 | 0.616007 |
| TSPAN19   | -0.31516 | 1.83E-05 | 0.00011  |
| TSPAN1    | 0.571339 | 8.21E-17 | 1.03E-14 |
| TSPAN2    | -0.03479 | 0.644771 | 0.73498  |
| TSPAN31   | 0.117962 | 0.116833 | 0.193246 |
| TSPAN32   | 0.007404 | 0.921863 | 0.945749 |
| TSPAN33   | -0.37183 | 3.22E-07 | 3.25E-06 |
| TSPAN3    | 0.2894   | 8.93E-05 | 0.000431 |
| TSPAN4    | 0.154289 | 0.039753 | 0.07929  |
| TSPAN5    | 0.143375 | 0.056228 | 0.10592  |
| TSPAN6    | 0.211316 | 0.004633 | 0.012828 |
| TSPAN7    | -0.44212 | 6.47E-10 | 1.46E-08 |



|        |          |          |          |
|--------|----------|----------|----------|
| TSPAN8 | 0.388589 | 8.32E-08 | 9.95E-07 |
| TSPAN9 | 0.08909  | 0.23697  | 0.340863 |
| TSP02  | 0.143102 | 0.056704 | 0.106534 |
| TSP0   | 0.613364 | 8.91E-20 | 2.48E-17 |
| TSPY2  | 0.012314 | 0.870415 | 0.910521 |
| TSPYL1 | -0.46197 | 8.53E-11 | 2.44E-09 |
| TSPYL2 | -0.39843 | 3.63E-08 | 4.79E-07 |
| TSPYL3 | -0.30733 | 3.01E-05 | 0.000169 |
| TSPYL4 | -0.37653 | 2.22E-07 | 2.34E-06 |
| TSPYL5 | -0.17119 | 0.022327 | 0.048705 |
| TSPYL6 | 0.036369 | 0.629831 | 0.722406 |
| TSR1   | -0.35971 | 8.17E-07 | 7.29E-06 |
| TSR2   | -0.19129 | 0.010534 | 0.025831 |
| TSSC1  | 0.248951 | 0.000805 | 0.002863 |
| TSSC4  | 0.072992 | 0.332908 | 0.445154 |
| TSSK1B | -0.10016 | 0.183442 | 0.277449 |
| TSSK3  | -0.01075 | 0.886778 | 0.92116  |
| TSSK4  | -0.05137 | 0.495876 | 0.603598 |
| TSSK6  | 0.03894  | 0.605813 | 0.701818 |
| TSTA3  | 0.364794 | 5.55E-07 | 5.22E-06 |
| TSTD1  | 0.241015 | 0.001192 | 0.003997 |
| TSTD2  | -0.438   | 9.71E-10 | 2.08E-08 |
| TST    | 0.345289 | 2.36E-06 | 1.83E-05 |
| TTBK1  | -0.06679 | 0.375715 | 0.488743 |
| TTBK2  | -0.25515 | 0.000588 | 0.002181 |
| TTC12  | -0.04777 | 0.526616 | 0.631875 |
| TTC13  | -0.00439 | 0.95366  | 0.968351 |
| TTC14  | 0.159628 | 0.033307 | 0.06842  |
| TTC15  | 0.128644 | 0.087015 | 0.152296 |
| TTC16  | 0.036756 | 0.626194 | 0.719696 |
| TTC17  | -0.3127  | 2.14E-05 | 0.000126 |
| TTC18  | -0.28373 | 0.000124 | 0.000574 |
| TTC19  | -0.28018 | 0.000152 | 0.000684 |
| TTC1   | 0.192137 | 0.010189 | 0.025087 |
| TTC21A | -0.14827 | 0.048253 | 0.093188 |
| TTC21B | -0.31295 | 2.11E-05 | 0.000124 |
| TTC22  | 0.284262 | 0.00012  | 0.000559 |
| TTC23L | -0.32983 | 6.93E-06 | 4.71E-05 |
| TTC23  | 0.304933 | 3.49E-05 | 0.000192 |
| TTC24  | -0.11473 | 0.127275 | 0.206934 |
| TTC25  | -0.30615 | 3.24E-05 | 0.000181 |
| TTC26  | -0.29141 | 7.93E-05 | 0.000388 |
| TTC27  | 0.242362 | 0.001116 | 0.003775 |
| TTC28  | -0.24327 | 0.001068 | 0.00363  |
| TTC29  | -0.2061  | 0.00578  | 0.01549  |
| TTC30A | -0.26203 | 0.000411 | 0.001606 |
| TTC30B | -0.22068 | 0.003075 | 0.00902  |
| TTC31  | 0.324956 | 9.62E-06 | 6.28E-05 |
| TTC32  | -0.04327 | 0.566291 | 0.666655 |
| TTC33  | -0.37453 | 2.60E-07 | 2.70E-06 |
| TTC35  | 0.083216 | 0.269447 | 0.377126 |
| TTC36  | -0.27713 | 0.00018  | 0.000792 |
| TTC37  | -0.33607 | 4.51E-06 | 3.25E-05 |
| TTC38  | 0.111888 | 0.137032 | 0.219745 |

|        |          |          |          |
|--------|----------|----------|----------|
| TTC39A | 0.023471 | 0.755815 | 0.825125 |
| TTC39B | -0.15706 | 0.036289 | 0.073485 |
| TTC39C | -0.20785 | 0.00537  | 0.014544 |
| TTC3   | -0.37779 | 2.01E-07 | 2.15E-06 |
| TTC4   | 0.082539 | 0.273377 | 0.381439 |
| TTC5   | -0.30774 | 2.93E-05 | 0.000165 |
| TTC7A  | 0.461026 | 9.42E-11 | 2.66E-09 |
| TTC7B  | -0.3415  | 3.09E-06 | 2.33E-05 |
| TTC8   | -0.33258 | 5.74E-06 | 4.02E-05 |
| TTC9B  | 0.025392 | 0.736537 | 0.809602 |
| TTC9C  | 0.418801 | 5.96E-09 | 1.01E-07 |
| TTC9   | 0.412196 | 1.09E-08 | 1.69E-07 |
| TTF1   | -0.00701 | 0.925991 | 0.948806 |
| TTF2   | 0.212502 | 0.004403 | 0.012264 |
| TTK    | 0.277711 | 0.000175 | 0.000771 |
| TTLL10 | -0.02597 | 0.73074  | 0.805264 |
| TTLL11 | -0.46114 | 9.31E-11 | 2.63E-09 |
| TTLL12 | 0.459004 | 1.16E-10 | 3.22E-09 |
| TTLL13 | 0.174284 | 0.019982 | 0.044391 |
| TTLL1  | -0.04769 | 0.527275 | 0.632359 |
| TTLL2  | -0.11882 | 0.114177 | 0.189917 |
| TTLL3  | 0.188777 | 0.011616 | 0.02807  |
| TTLL4  | 0.206479 | 0.005688 | 0.015279 |
| TTLL5  | 0.139003 | 0.064248 | 0.118243 |
| TTLL6  | -0.19699 | 0.0084   | 0.021289 |
| TTLL7  | -0.36441 | 5.71E-07 | 5.34E-06 |
| TTLL8  | -0.04364 | 0.563033 | 0.663731 |
| TTLL9  | -0.17194 | 0.021738 | 0.047586 |
| TTL    | -0.32197 | 1.17E-05 | 7.47E-05 |
| TTN    | -0.21724 | 0.003582 | 0.010273 |
| TTPAL  | -0.24148 | 0.001165 | 0.003918 |
| TTPA   | -0.08929 | 0.235894 | 0.339883 |
| TTR    | -0.07355 | 0.3292   | 0.441179 |
| TTY10  | -0.04197 | 0.57806  | 0.677085 |
| TTY14  | -0.04017 | 0.59451  | 0.691886 |
| TTY15  | -0.09161 | 0.223893 | 0.3261   |
| TTY1B  | -0.05368 | 0.476698 | 0.586318 |
| TTY2   | -0.03947 | 0.600886 | 0.697378 |
| TTY4C  | -0.31535 | 1.81E-05 | 0.000109 |
| TTY6   | -0.018   | 0.811531 | 0.866621 |
| TTY7   | 0.106935 | 0.155398 | 0.243338 |
| TTY9B  | -0.094   | 0.212013 | 0.312373 |
| TYH1   | -0.01199 | 0.873825 | 0.912727 |
| TYH2   | -0.26617 | 0.000329 | 0.001328 |
| TYH3   | 0.354291 | 1.22E-06 | 1.03E-05 |
| TUBA1A | -0.20058 | 0.007261 | 0.018796 |
| TUBA1B | 0.030485 | 0.686249 | 0.769919 |
| TUBA1C | 0.448922 | 3.28E-10 | 8.08E-09 |
| TUBA3C | 0.009386 | 0.901045 | 0.931029 |
| TUBA3D | -0.09255 | 0.219195 | 0.320802 |
| TUBA3E | -0.06444 | 0.39279  | 0.505502 |
| TUBA4A | 0.411463 | 1.16E-08 | 1.79E-07 |
| TUBA4B | -0.04588 | 0.543095 | 0.646158 |
| TUBA8  | -0.05258 | 0.485811 | 0.594641 |

|         |          |          |          |
|---------|----------|----------|----------|
| TUBAL3  | 0.279469 | 0.000158 | 0.000709 |
| TUBB1   | -0.45004 | 2.93E-10 | 7.33E-09 |
| TUBB2A  | 0.076209 | 0.311984 | 0.422864 |
| TUBB2B  | -0.11358 | 0.131168 | 0.212061 |
| TUBB2C  | 0.240268 | 0.001236 | 0.004125 |
| TUBB3   | 0.215728 | 0.003828 | 0.010898 |
| TUBB4Q  | -0.09149 | 0.224518 | 0.326751 |
| TUBB4   | -0.04034 | 0.592886 | 0.6902   |
| TUBB6   | 0.121666 | 0.105703 | 0.178688 |
| TUBB8   | -0.02464 | 0.744032 | 0.815638 |
| TUBBP5  | -0.05007 | 0.506898 | 0.613728 |
| TUBB    | 0.289773 | 8.73E-05 | 0.000423 |
| TUBD1   | -0.33803 | 3.94E-06 | 2.88E-05 |
| TUBE1   | -0.34202 | 2.97E-06 | 2.26E-05 |
| TUBG1   | 0.093195 | 0.215973 | 0.317096 |
| TUBG2   | -0.06683 | 0.375456 | 0.488471 |
| TUBGCP2 | 0.069783 | 0.354657 | 0.467595 |
| TUBGCP3 | -0.1093  | 0.146418 | 0.231788 |
| TUBGCP4 | -0.1693  | 0.023873 | 0.051608 |
| TUBGCP5 | -0.12972 | 0.084397 | 0.148488 |
| TUBGCP6 | -0.11927 | 0.112817 | 0.188146 |
| TUB     | -0.27526 | 0.0002   | 0.000867 |
| TUFM    | 0.182471 | 0.014776 | 0.034423 |
| TUFT1   | 0.461691 | 8.78E-11 | 2.50E-09 |
| TUG1    | -0.03222 | 0.669425 | 0.756628 |
| TULP1   | 0.008515 | 0.910181 | 0.937196 |
| TULP2   | -0.04985 | 0.508736 | 0.615253 |
| TULP3   | -0.12191 | 0.104995 | 0.177738 |
| TULP4   | -0.39086 | 6.88E-08 | 8.41E-07 |
| TUSC1   | -0.13129 | 0.080657 | 0.143171 |
| TUSC2   | -0.02964 | 0.694475 | 0.776274 |
| TUSC3   | -0.29949 | 4.88E-05 | 0.000257 |
| TUSC5   | -0.18844 | 0.011771 | 0.028368 |
| TUT1    | 0.054428 | 0.470555 | 0.580676 |
| TWF1    | -0.03135 | 0.677867 | 0.763233 |
| TWF2    | 0.535786 | 1.29E-14 | 9.24E-13 |
| TWIST1  | 0.291407 | 7.93E-05 | 0.000388 |
| TWIST2  | -0.05567 | 0.460489 | 0.57082  |
| TWISTNB | -0.11676 | 0.120639 | 0.198231 |
| TWSG1   | 0.06574  | 0.383293 | 0.496153 |
| TXK     | -0.06396 | 0.396327 | 0.509059 |
| TXLNA   | -0.37774 | 2.01E-07 | 2.15E-06 |
| TXLNB   | -0.08626 | 0.252259 | 0.358139 |
| TXLNG   | -0.26604 | 0.000332 | 0.001336 |
| TXN2    | -0.00312 | 0.966988 | 0.977468 |
| TXNDC11 | -0.09759 | 0.195016 | 0.291743 |
| TXNDC12 | 0.099683 | 0.185545 | 0.279967 |
| TXNDC15 | -0.35537 | 1.13E-06 | 9.65E-06 |
| TXNDC16 | -0.40879 | 1.47E-08 | 2.18E-07 |
| TXNDC17 | 0.288951 | 9.16E-05 | 0.00044  |
| TXNDC2  | 0.038178 | 0.612888 | 0.708355 |
| TXNDC3  | 0.024004 | 0.750457 | 0.82088  |
| TXNDC5  | -0.29383 | 6.87E-05 | 0.000343 |
| TXNDC6  | -0.22228 | 0.002863 | 0.008496 |

|           |          |          |          |
|-----------|----------|----------|----------|
| TXNDC9    | 0.230263 | 0.001987 | 0.006199 |
| TXNIP     | 0.243962 | 0.001032 | 0.003527 |
| TXNL1     | -0.25165 | 0.000703 | 0.002541 |
| TXNL4A    | -0.26127 | 0.000427 | 0.001662 |
| TXNL4B    | -0.0532  | 0.480642 | 0.590068 |
| TXNRD1    | -0.11179 | 0.137394 | 0.220218 |
| TXNRD2    | -0.0597  | 0.428591 | 0.540564 |
| TXNRD3IT1 | 0.027235 | 0.718202 | 0.795125 |
| TXN       | 0.476171 | 1.84E-11 | 6.19E-10 |
| TYK2      | 0.00248  | 0.973792 | 0.982171 |
| TYMP      | 0.390192 | 7.28E-08 | 8.84E-07 |
| TYMS      | 0.237253 | 0.001429 | 0.004673 |
| TYRO3     | 0.212787 | 0.004349 | 0.01214  |
| TYROBP    | 0.169227 | 0.023935 | 0.051697 |
| TYRP1     | 0.131549 | 0.080061 | 0.142291 |
| TYR       | -0.11133 | 0.139013 | 0.222236 |
| TYSND1    | 0.102506 | 0.173338 | 0.265417 |
| TYW1B     | -0.24329 | 0.001066 | 0.003628 |
| TYW1      | -0.19464 | 0.009229 | 0.023051 |
| TYW3      | -0.2652  | 0.000347 | 0.001391 |
| T         | -0.09875 | 0.189709 | 0.285162 |
| U2AF1L4   | -0.03903 | 0.604987 | 0.701109 |
| U2AF1     | 0.163793 | 0.028914 | 0.060702 |
| U2AF2     | -0.06105 | 0.418178 | 0.530441 |
| UACA      | 0.276059 | 0.000192 | 0.000834 |
| UAP1L1    | -0.11122 | 0.139412 | 0.222767 |
| UAP1      | 0.051186 | 0.497433 | 0.604935 |
| UBA1      | 0.277137 | 0.00018  | 0.000791 |
| UBA2      | -0.17355 | 0.020515 | 0.045381 |
| UBA3      | 0.150053 | 0.045588 | 0.089024 |
| UBA52     | 0.036491 | 0.628687 | 0.721512 |
| UBA5      | -0.25793 | 0.000509 | 0.00193  |
| UBA6      | 0.271964 | 0.00024  | 0.001013 |
| UBA7      | 0.382077 | 1.42E-07 | 1.59E-06 |
| UBAC1     | -0.05796 | 0.44218  | 0.553993 |
| UBAC2     | 0.507307 | 4.95E-13 | 2.51E-11 |
| UBAP1     | 0.216589 | 0.003686 | 0.010539 |
| UBAP2L    | 0.014201 | 0.850767 | 0.895511 |
| UBAP2     | -0.08461 | 0.261476 | 0.368263 |
| UBASH3A   | -0.09879 | 0.189523 | 0.284991 |
| UBASH3B   | 0.301412 | 4.34E-05 | 0.000233 |
| UBB       | -0.12597 | 0.093827 | 0.161798 |
| UBC       | 0.277619 | 0.000176 | 0.000773 |
| UBD       | 0.286382 | 0.000106 | 0.000501 |
| UBE2A     | 0.153642 | 0.040602 | 0.080729 |
| UBE2B     | 0.046306 | 0.539367 | 0.642535 |
| UBE2CBP   | -0.29705 | 5.66E-05 | 0.000291 |
| UBE2C     | 0.406498 | 1.80E-08 | 2.62E-07 |
| UBE2D1    | 0.087347 | 0.246308 | 0.351247 |
| UBE2D2    | -0.05145 | 0.495201 | 0.603147 |
| UBE2D3    | -0.0728  | 0.334174 | 0.446423 |
| UBE2D4    | -0.37339 | 2.85E-07 | 2.91E-06 |
| UBE2DNL   | -0.09919 | 0.187724 | 0.282781 |
| UBE2E1    | 0.275606 | 0.000196 | 0.000853 |

|          |          |          |          |
|----------|----------|----------|----------|
| UBE2E2   | -0.01648 | 0.827175 | 0.877588 |
| UBE2E3   | 0.408927 | 1.45E-08 | 2.16E-07 |
| UBE2F    | -0.1156  | 0.1244   | 0.203162 |
| UBE2G1   | -0.4401  | 7.90E-10 | 1.73E-08 |
| UBE2G2   | -0.1429  | 0.057066 | 0.107092 |
| UBE2H    | 0.03731  | 0.620994 | 0.715156 |
| UBE2I    | 0.353425 | 1.30E-06 | 1.09E-05 |
| UBE2J1   | -0.42706 | 2.77E-09 | 5.16E-08 |
| UBE2J2   | -0.02591 | 0.731386 | 0.805907 |
| UBE2K    | -0.09735 | 0.196121 | 0.293018 |
| UBE2L3   | 0.069279 | 0.35815  | 0.471226 |
| UBE2L6   | 0.299771 | 4.80E-05 | 0.000254 |
| UBE2MP1  | -0.13009 | 0.083491 | 0.147236 |
| UBE2M    | 0.10735  | 0.153794 | 0.241225 |
| UBE2NL   | -0.08212 | 0.275803 | 0.383741 |
| UBE2N    | -0.18174 | 0.015185 | 0.035201 |
| UBE2O    | -0.44807 | 3.58E-10 | 8.68E-09 |
| UBE2Q1   | 0.040897 | 0.58781  | 0.686108 |
| UBE2Q2P1 | -0.0346  | 0.646558 | 0.73655  |
| UBE2Q2   | 0.062576 | 0.406653 | 0.519019 |
| UBE2QL1  | -0.26604 | 0.000331 | 0.001336 |
| UBE2R2   | 0.017287 | 0.81885  | 0.871706 |
| UBE2S    | 0.141264 | 0.05999  | 0.111594 |
| UBE2T    | 0.332141 | 5.92E-06 | 4.13E-05 |
| UBE2U    | -0.02301 | 0.760482 | 0.829121 |
| UBE2V1   | 0.133731 | 0.075138 | 0.134984 |
| UBE2V2   | -0.05577 | 0.459701 | 0.570236 |
| UBE2W    | -0.16402 | 0.028694 | 0.060303 |
| UBE2Z    | 0.203358 | 0.006478 | 0.017087 |
| UBE3A    | -0.21005 | 0.004891 | 0.013447 |
| UBE3B    | -0.24058 | 0.001217 | 0.004068 |
| UBE3C    | -0.18458 | 0.013642 | 0.032188 |
| UBE4A    | -0.00915 | 0.903522 | 0.932525 |
| UBE4B    | -0.35024 | 1.65E-06 | 1.34E-05 |
| UBFD1    | -0.29117 | 8.04E-05 | 0.000393 |
| UBIAD1   | -0.30316 | 3.90E-05 | 0.000212 |
| UBL3     | -0.30096 | 4.46E-05 | 0.000238 |
| UBL4A    | 0.072169 | 0.338403 | 0.450612 |
| UBL4B    | 0.090021 | 0.232089 | 0.335648 |
| UBL5     | 0.173178 | 0.020794 | 0.04586  |
| UBL7     | 0.05377  | 0.475943 | 0.585629 |
| UBLCP1   | 0.072465 | 0.336423 | 0.448731 |
| UBN1     | -0.07692 | 0.307449 | 0.417921 |
| UBN2     | -0.34845 | 1.88E-06 | 1.50E-05 |
| UBOX5    | -0.26439 | 0.000362 | 0.001445 |
| UBP1     | -0.17542 | 0.019178 | 0.042865 |
| UBQLN1   | -0.21817 | 0.003438 | 0.00992  |
| UBQLN2   | -0.19829 | 0.00797  | 0.020378 |
| UBQLN3   | 0.027011 | 0.720421 | 0.796778 |
| UBQLN4   | 0.311405 | 2.33E-05 | 0.000135 |
| UBQLNL   | 0.255508 | 0.000577 | 0.002148 |
| UBR1     | -0.10381 | 0.167884 | 0.25885  |
| UBR2     | -0.21925 | 0.003278 | 0.009515 |
| UBR3     | -0.36882 | 4.07E-07 | 3.98E-06 |

|         |          |          |          |
|---------|----------|----------|----------|
| UBR4    | -0.06058 | 0.421822 | 0.534037 |
| UBR5    | -0.14256 | 0.057665 | 0.108052 |
| UBR7    | -0.31655 | 1.67E-05 | 0.000101 |
| UBTD1   | 0.243949 | 0.001033 | 0.003528 |
| UBTD2   | 0.089813 | 0.233175 | 0.337014 |
| UBTFL1  | -0.04053 | 0.59112  | 0.688752 |
| UBTF    | -0.17231 | 0.021456 | 0.047067 |
| UBXN10  | 0.129167 | 0.085729 | 0.15043  |
| UBXN11  | 0.113549 | 0.131263 | 0.21218  |
| UBXN1   | 0.313729 | 2.00E-05 | 0.000119 |
| UBXN2A  | 0.062332 | 0.408488 | 0.520722 |
| UBXN2B  | -0.01163 | 0.877531 | 0.915042 |
| UBXN4   | -0.20292 | 0.006596 | 0.017355 |
| UBXN6   | 0.022984 | 0.760729 | 0.829295 |
| UBXN7   | -0.23924 | 0.001299 | 0.004306 |
| UBXN8   | -0.08845 | 0.240366 | 0.344719 |
| UCA1    | 0.496366 | 1.84E-12 | 8.11E-11 |
| UCHL1   | -0.28552 | 0.000112 | 0.000525 |
| UCHL3   | 0.354035 | 1.25E-06 | 1.05E-05 |
| UCHL5   | 0.02864  | 0.70432  | 0.784412 |
| UCK1    | -0.31869 | 1.45E-05 | 8.99E-05 |
| UCK2    | 0.259352 | 0.000473 | 0.001809 |
| UCKL1AS | -0.12657 | 0.092272 | 0.159688 |
| UCKL1   | 0.04038  | 0.592535 | 0.689913 |
| UCMA    | -0.13525 | 0.071849 | 0.130081 |
| UCN2    | 0.354365 | 1.22E-06 | 1.03E-05 |
| UCN3    | -0.16831 | 0.02472  | 0.053132 |
| UCN     | 0.204006 | 0.006307 | 0.016684 |
| UCP1    | -0.19453 | 0.009268 | 0.023125 |
| UCP2    | -0.25481 | 0.000598 | 0.002211 |
| UCP3    | -0.05293 | 0.482873 | 0.592095 |
| UEVLD   | 0.007467 | 0.921206 | 0.945398 |
| UFC1    | -0.01129 | 0.881052 | 0.917522 |
| UFD1L   | -0.00024 | 0.997422 | 0.997876 |
| UFM1    | 0.056871 | 0.450835 | 0.561669 |
| UFSP1   | -0.0777  | 0.302579 | 0.412833 |
| UFSP2   | -0.11409 | 0.129411 | 0.209702 |
| UGCG    | -0.10128 | 0.178571 | 0.271516 |
| UGDH    | -0.09473 | 0.208452 | 0.308066 |
| UGGT1   | -0.18497 | 0.013443 | 0.031779 |
| UGGT2   | 0.139761 | 0.062793 | 0.116023 |
| UGP2    | 0.174186 | 0.020052 | 0.044492 |
| UGT1A10 | 0.593279 | 2.63E-18 | 5.06E-16 |
| UGT1A1  | 0.297644 | 5.46E-05 | 0.000283 |
| UGT1A3  | 0.075613 | 0.315794 | 0.427092 |
| UGT1A4  | 0.089236 | 0.236202 | 0.340173 |
| UGT1A5  | 0.016736 | 0.824525 | 0.875767 |
| UGT1A6  | 0.552386 | 1.31E-15 | 1.17E-13 |
| UGT1A7  | 0.311088 | 2.37E-05 | 0.000137 |
| UGT1A8  | 0.405668 | 1.94E-08 | 2.78E-07 |
| UGT1A9  | 0.606941 | 2.70E-19 | 6.68E-17 |
| UGT2A1  | -0.0134  | 0.859114 | 0.901896 |
| UGT2A3  | 0.18036  | 0.01599  | 0.036791 |
| UGT2B10 | -0.07355 | 0.329228 | 0.441186 |

|           |          |          |          |
|-----------|----------|----------|----------|
| UGT2B11   | -0.16287 | 0.029847 | 0.062408 |
| UGT2B15   | -0.00839 | 0.911532 | 0.938001 |
| UGT2B28   | -0.05913 | 0.433059 | 0.544795 |
| UGT2B4    | -0.21341 | 0.004234 | 0.011876 |
| UGT2B7    | 0.128458 | 0.087479 | 0.152914 |
| UGT3A1    | -0.13099 | 0.081357 | 0.144256 |
| UGT3A2    | 0.001478 | 0.984382 | 0.989185 |
| UGT8      | 0.172275 | 0.021479 | 0.047108 |
| UHMK1     | -0.08268 | 0.272541 | 0.380568 |
| UHRF1BP1I | -0.26645 | 0.000324 | 0.001311 |
| UHRF1BP1  | -0.41201 | 1.10E-08 | 1.72E-07 |
| UHRF1     | 0.423488 | 3.87E-09 | 6.95E-08 |
| UHRF2     | -0.02983 | 0.692598 | 0.774673 |
| UIMC1     | 0.071283 | 0.344387 | 0.456737 |
| ULBP1     | -0.00667 | 0.929617 | 0.951325 |
| ULBP2     | 0.230189 | 0.001994 | 0.006217 |
| ULBP3     | 0.109694 | 0.144952 | 0.229818 |
| ULK1      | -0.23377 | 0.001686 | 0.00539  |
| ULK2      | -0.45382 | 1.99E-10 | 5.17E-09 |
| ULK3      | 0.025476 | 0.735701 | 0.808972 |
| ULK4      | -0.28667 | 0.000105 | 0.000495 |
| UMODL1    | -0.11226 | 0.135731 | 0.218077 |
| UMOD      | -0.1244  | 0.098042 | 0.167892 |
| UMPS      | 0.21347  | 0.004223 | 0.01185  |
| UNC119B   | -0.58631 | 8.08E-18 | 1.33E-15 |
| UNC119    | -0.08344 | 0.268157 | 0.375773 |
| UNC13A    | -0.39395 | 5.31E-08 | 6.72E-07 |
| UNC13B    | -0.29259 | 7.39E-05 | 0.000366 |
| UNC13C    | 0.075035 | 0.319522 | 0.431249 |
| UNC13D    | 0.573293 | 6.11E-17 | 8.16E-15 |
| UNC45A    | 0.063639 | 0.398709 | 0.511292 |
| UNC45B    | -0.12185 | 0.105175 | 0.178014 |
| UNC50     | -0.03546 | 0.638412 | 0.729793 |
| UNC5A     | 0.083308 | 0.268914 | 0.376568 |
| UNC5B     | 0.224793 | 0.002556 | 0.007703 |
| UNC5CL    | 0.180381 | 0.015978 | 0.036772 |
| UNC5C     | -0.06473 | 0.390627 | 0.503307 |
| UNC5D     | -0.28785 | 9.78E-05 | 0.000466 |
| UNC80     | -0.30606 | 3.26E-05 | 0.000181 |
| UNC93A    | 0.028687 | 0.70386  | 0.784031 |
| UNC93B1   | 0.63015  | 4.34E-21 | 1.83E-18 |
| UNG       | 0.045245 | 0.548709 | 0.651193 |
| UNKL      | -0.09288 | 0.217536 | 0.318893 |
| UNK       | -0.31094 | 2.40E-05 | 0.000138 |
| UOX       | -0.18595 | 0.012951 | 0.030774 |
| UPB1      | -0.21032 | 0.004834 | 0.013317 |
| UPF0639   | 0.077161 | 0.30596  | 0.416212 |
| UPF1      | 0.029416 | 0.696698 | 0.778114 |
| UPF2      | -0.12386 | 0.099508 | 0.16989  |
| UPF3A     | -0.09414 | 0.211334 | 0.311557 |
| UPF3B     | -0.07389 | 0.327    | 0.439034 |
| UPK1A     | 0.099785 | 0.185094 | 0.279414 |
| UPK1B     | 0.135505 | 0.071318 | 0.129285 |
| UPK2      | 0.362513 | 6.60E-07 | 6.08E-06 |

|          |          |          |          |
|----------|----------|----------|----------|
| UPK3A    | 0.040535 | 0.591118 | 0.688752 |
| UPK3BL   | 0.189565 | 0.011267 | 0.027352 |
| UPK3B    | 0.34209  | 2.96E-06 | 2.25E-05 |
| UPP1     | 0.385775 | 1.05E-07 | 1.21E-06 |
| UPP2     | -0.10724 | 0.154205 | 0.241735 |
| UPRT     | -0.3596  | 8.23E-07 | 7.34E-06 |
| UQCC     | -0.22273 | 0.002805 | 0.008343 |
| UQCR10   | 0.066066 | 0.380936 | 0.493651 |
| UQCR11   | 0.090043 | 0.231973 | 0.33553  |
| UQCRB    | -0.10583 | 0.159732 | 0.24841  |
| UQCRC1   | 0.216901 | 0.003636 | 0.010417 |
| UQCRC2   | 0.172728 | 0.021133 | 0.046504 |
| UQCRFS1  | 0.008956 | 0.905555 | 0.934162 |
| UQCRHL   | 0.126905 | 0.091407 | 0.158406 |
| UQCRH    | 0.161049 | 0.031748 | 0.065627 |
| UQCRQ    | 0.124786 | 0.096992 | 0.16637  |
| URB1     | -0.12878 | 0.086672 | 0.151797 |
| URB2     | -0.16295 | 0.029762 | 0.062258 |
| URGCP    | -0.07871 | 0.29632  | 0.406256 |
| URM1     | 0.162451 | 0.030272 | 0.063143 |
| UROC1    | -0.11316 | 0.1326   | 0.213904 |
| UROD     | 0.034253 | 0.6499   | 0.738995 |
| UROS     | 0.089824 | 0.233114 | 0.336959 |
| USE1     | 0.144891 | 0.053648 | 0.101828 |
| USF1     | 0.377766 | 2.01E-07 | 2.15E-06 |
| USF2     | -0.12811 | 0.088345 | 0.154091 |
| USH1C    | 0.226531 | 0.002361 | 0.007197 |
| USH1G    | -0.12649 | 0.092468 | 0.159928 |
| USH2A    | -0.35812 | 9.20E-07 | 8.06E-06 |
| USHBP1   | -0.17901 | 0.016811 | 0.038346 |
| USMG5    | 0.149022 | 0.047112 | 0.091432 |
| US01     | -0.35315 | 1.33E-06 | 1.11E-05 |
| USP10    | 0.040349 | 0.592826 | 0.690171 |
| USP11    | -0.32638 | 8.74E-06 | 5.77E-05 |
| USP12    | -0.2022  | 0.006796 | 0.017802 |
| USP13    | -0.52992 | 2.82E-14 | 1.89E-12 |
| USP14    | -0.03676 | 0.626192 | 0.719696 |
| USP15    | -0.12087 | 0.108019 | 0.181877 |
| USP16    | -0.36957 | 3.84E-07 | 3.78E-06 |
| USP17L2  | 0.022745 | 0.763146 | 0.831358 |
| USP17L6P | 0.047843 | 0.525966 | 0.631325 |
| USP17    | -0.07339 | 0.330281 | 0.442418 |
| USP18    | 0.128562 | 0.08722  | 0.152573 |
| USP19    | -0.17872 | 0.016993 | 0.038708 |
| USP1     | -0.24686 | 0.000894 | 0.003123 |
| USP20    | -0.30034 | 4.64E-05 | 0.000246 |
| USP21    | 0.00789  | 0.916749 | 0.942193 |
| USP22    | -0.59391 | 2.38E-18 | 4.70E-16 |
| USP24    | -0.08899 | 0.237486 | 0.341421 |
| USP25    | -0.02623 | 0.728165 | 0.803158 |
| USP26    | 0.190456 | 0.010883 | 0.02656  |
| USP27X   | -0.41176 | 1.13E-08 | 1.75E-07 |
| USP28    | -0.17865 | 0.017037 | 0.038782 |
| USP29    | -0.03723 | 0.621777 | 0.715838 |



|        |          |          |          |
|--------|----------|----------|----------|
| USP2   | -0.3419  | 3.00E-06 | 2.27E-05 |
| USP30  | -0.44215 | 6.46E-10 | 1.45E-08 |
| USP31  | -0.24291 | 0.001087 | 0.003688 |
| USP32  | -0.06644 | 0.378216 | 0.490931 |
| USP33  | -0.18683 | 0.012522 | 0.029938 |
| USP34  | -0.20727 | 0.005503 | 0.014844 |
| USP35  | 0.059063 | 0.433553 | 0.545153 |
| USP36  | -0.26968 | 0.000272 | 0.001128 |
| USP37  | -0.08543 | 0.256891 | 0.363281 |
| USP38  | -0.28073 | 0.000147 | 0.000665 |
| USP39  | 0.325983 | 8.98E-06 | 5.91E-05 |
| USP3   | 0.201151 | 0.007095 | 0.018426 |
| USP40  | 0.059661 | 0.428897 | 0.540881 |
| USP42  | -0.37782 | 2.00E-07 | 2.14E-06 |
| USP43  | 0.297431 | 5.53E-05 | 0.000286 |
| USP44  | -0.2209  | 0.003046 | 0.008958 |
| USP45  | -0.29778 | 5.42E-05 | 0.000281 |
| USP46  | -0.36148 | 7.14E-07 | 6.51E-06 |
| USP47  | -0.2637  | 0.000376 | 0.001488 |
| USP48  | -0.05852 | 0.437762 | 0.549398 |
| USP49  | -0.16158 | 0.031179 | 0.064686 |
| USP4   | 0.305267 | 3.42E-05 | 0.000189 |
| USP50  | 0.092753 | 0.218164 | 0.319649 |
| USP51  | -0.44335 | 5.73E-10 | 1.31E-08 |
| USP53  | -0.04306 | 0.568181 | 0.668007 |
| USP54  | 0.305459 | 3.38E-05 | 0.000187 |
| USP5   | -0.19577 | 0.008823 | 0.022181 |
| USP6NL | 0.165862 | 0.026923 | 0.057134 |
| USP6   | -0.14123 | 0.060052 | 0.111687 |
| USP7   | -0.26854 | 0.00029  | 0.001193 |
| USP8   | -0.23592 | 0.001523 | 0.004934 |
| USP9X  | -0.30073 | 4.53E-05 | 0.000241 |
| USP9Y  | -0.07727 | 0.305251 | 0.415493 |
| USPL1  | -0.18516 | 0.013347 | 0.031574 |
| UST    | 0.222694 | 0.00281  | 0.008357 |
| UTF1   | 0.020662 | 0.78427  | 0.846932 |
| UTP11L | -0.13761 | 0.066999 | 0.122568 |
| UTP14A | 0.110637 | 0.141506 | 0.225493 |
| UTP14C | -0.11308 | 0.132859 | 0.2142   |
| UTP15  | -0.07012 | 0.352324 | 0.465046 |
| UTP18  | -0.10731 | 0.153931 | 0.241384 |
| UTP20  | -0.35958 | 8.25E-07 | 7.35E-06 |
| UTP23  | -0.22568 | 0.002455 | 0.007443 |
| UTP3   | 0.089346 | 0.235621 | 0.339589 |
| UTP6   | 0.202994 | 0.006577 | 0.017315 |
| UTRN   | -0.26794 | 0.000299 | 0.001226 |
| UTS2D  | 0.04888  | 0.517032 | 0.623173 |
| UTS2R  | -0.1262  | 0.093242 | 0.160985 |
| UTS2   | 0.211007 | 0.004695 | 0.012975 |
| UTY    | -0.07604 | 0.313035 | 0.423908 |
| UVRAG  | -0.0666  | 0.377066 | 0.489695 |
| UXS1   | 0.051382 | 0.495785 | 0.603561 |
| UXT    | 0.045965 | 0.542356 | 0.645473 |
| VAC14  | 0.130274 | 0.083056 | 0.146612 |

|         |          |          |          |
|---------|----------|----------|----------|
| VAMP1   | -0.06935 | 0.357643 | 0.470685 |
| VAMP2   | -0.39867 | 3.55E-08 | 4.71E-07 |
| VAMP3   | 0.220104 | 0.003156 | 0.009219 |
| VAMP4   | -0.0297  | 0.693886 | 0.775718 |
| VAMP5   | 0.154386 | 0.039628 | 0.079112 |
| VAMP7   | -0.15173 | 0.043205 | 0.085093 |
| VAMP8   | 0.520952 | 9.02E-14 | 5.39E-12 |
| VANGL1  | 0.312591 | 2.16E-05 | 0.000126 |
| VANGL2  | 0.194947 | 0.009116 | 0.022784 |
| VAPA    | 0.031353 | 0.677811 | 0.763228 |
| VAPB    | -0.3466  | 2.14E-06 | 1.69E-05 |
| VARS2   | 0.128268 | 0.087952 | 0.153582 |
| VARS    | 0.183309 | 0.014317 | 0.0335   |
| VASH1   | -0.26465 | 0.000357 | 0.001428 |
| VASH2   | -0.02918 | 0.699026 | 0.78001  |
| VASN    | 0.236783 | 0.001462 | 0.004761 |
| VASP    | 0.637186 | 1.16E-21 | 6.19E-19 |
| VAT1L   | -0.24664 | 0.000904 | 0.003152 |
| VAT1    | 0.046522 | 0.537468 | 0.64085  |
| VAV1    | 0.260857 | 0.000437 | 0.001693 |
| VAV2    | 0.120494 | 0.109133 | 0.183332 |
| VAV3    | -0.1729  | 0.021004 | 0.046273 |
| VAX1    | -0.00241 | 0.97448  | 0.982585 |
| VAX2    | -0.00524 | 0.944649 | 0.962704 |
| VBP1    | -0.30084 | 4.50E-05 | 0.00024  |
| VCAM1   | 0.236773 | 0.001462 | 0.004762 |
| VCAN    | 0.177586 | 0.017717 | 0.040084 |
| VCL     | 0.333081 | 5.55E-06 | 3.90E-05 |
| VCPIP1  | -0.12788 | 0.088934 | 0.154941 |
| VCP     | -0.10119 | 0.178955 | 0.271975 |
| VCX2    | 0.018457 | 0.806818 | 0.86322  |
| VCX3A   | -0.00332 | 0.964926 | 0.976232 |
| VCX3B   | 0.004347 | 0.954079 | 0.968577 |
| VCX     | 0.014701 | 0.845577 | 0.891092 |
| VDAC1   | 0.346759 | 2.12E-06 | 1.67E-05 |
| VDAC2   | 0.219599 | 0.003227 | 0.009399 |
| VDAC3   | 0.126378 | 0.092771 | 0.160331 |
| VDR     | 0.426516 | 2.91E-09 | 5.41E-08 |
| VEGFA   | 0.102745 | 0.172333 | 0.264144 |
| VEGFB   | 0.081529 | 0.279308 | 0.387709 |
| VEGFC   | -0.05082 | 0.50053  | 0.607693 |
| VENTXP7 | 0.07036  | 0.350687 | 0.46338  |
| VENTX   | 0.056992 | 0.44987  | 0.560785 |
| VEPH1   | 0.114024 | 0.129645 | 0.209976 |
| VEZF1   | -0.23215 | 0.00182  | 0.00575  |
| VEZT    | 0.245103 | 0.000976 | 0.003361 |
| VGf     | -0.19447 | 0.009291 | 0.023177 |
| VGLL1   | 0.399949 | 3.18E-08 | 4.27E-07 |
| VGLL2   | -0.00399 | 0.957886 | 0.971181 |
| VGLL3   | 0.089137 | 0.236725 | 0.340634 |
| VGLL4   | 0.323395 | 1.07E-05 | 6.88E-05 |
| VHLL    | -0.11553 | 0.124633 | 0.203425 |
| VHL     | -0.14577 | 0.052195 | 0.099519 |
| VIL1    | 0.039592 | 0.599785 | 0.696467 |

|          |          |          |          |
|----------|----------|----------|----------|
| VILL     | 0.729819 | 6.96E-31 | 4.59E-27 |
| VIM      | 0.065487 | 0.385131 | 0.49787  |
| VIPAR    | 0.152252 | 0.042476 | 0.083899 |
| VIPR1    | -0.09912 | 0.188037 | 0.283122 |
| VIPR2    | -0.24592 | 0.000937 | 0.003247 |
| VIP      | -0.05172 | 0.492951 | 0.601386 |
| VIT      | -0.17428 | 0.019987 | 0.044396 |
| VKORC1L1 | -0.04135 | 0.583691 | 0.682227 |
| VKORC1   | -0.02665 | 0.723981 | 0.799776 |
| VLDLR    | -0.34081 | 3.24E-06 | 2.44E-05 |
| VMA21    | -0.23672 | 0.001466 | 0.004773 |
| VMAC     | 0.087722 | 0.244279 | 0.349041 |
| VM01     | 0.139689 | 0.06293  | 0.116211 |
| VN1R1    | 0.004465 | 0.952833 | 0.96786  |
| VN1R2    | -0.17722 | 0.017955 | 0.04053  |
| VN1R5    | 0.01042  | 0.890209 | 0.923654 |
| VNN1     | 0.195609 | 0.008879 | 0.022283 |
| VNN2     | -0.00448 | 0.952699 | 0.967792 |
| VNN3     | -0.12064 | 0.1087   | 0.182729 |
| VOPP1    | -0.09769 | 0.194528 | 0.291144 |
| VPRBP    | -0.13557 | 0.071186 | 0.129069 |
| VPREB1   | 0.076565 | 0.309723 | 0.420223 |
| VPREB3   | -0.03117 | 0.67955  | 0.764359 |
| VPS11    | -0.03174 | 0.674071 | 0.760358 |
| VPS13A   | -0.13883 | 0.064578 | 0.118788 |
| VPS13B   | -0.20402 | 0.006302 | 0.016673 |
| VPS13C   | -0.27312 | 0.000225 | 0.000959 |
| VPS13D   | -0.23067 | 0.00195  | 0.006098 |
| VPS16    | -0.13045 | 0.082646 | 0.14608  |
| VPS18    | -0.0045  | 0.952513 | 0.967776 |
| VPS24    | 0.16598  | 0.026813 | 0.05695  |
| VPS25    | 0.145518 | 0.052611 | 0.100185 |
| VPS26A   | 0.282353 | 0.000134 | 0.000615 |
| VPS26B   | -0.27721 | 0.00018  | 0.000789 |
| VPS28    | 0.24467  | 0.000997 | 0.003425 |
| VPS29    | 0.11544  | 0.124919 | 0.203842 |
| VPS33A   | -0.39863 | 3.57E-08 | 4.72E-07 |
| VPS33B   | 0.077751 | 0.302269 | 0.412525 |
| VPS35    | 0.170217 | 0.023111 | 0.050165 |
| VPS36    | 0.020137 | 0.789625 | 0.851087 |
| VPS37A   | -0.17622 | 0.018627 | 0.041794 |
| VPS37B   | 0.359543 | 8.27E-07 | 7.36E-06 |
| VPS37C   | 0.263689 | 0.000376 | 0.001488 |
| VPS37D   | -0.08786 | 0.243532 | 0.348199 |
| VPS39    | -0.10198 | 0.175577 | 0.267952 |
| VPS41    | -0.20895 | 0.005125 | 0.013991 |
| VPS45    | 0.11783  | 0.117248 | 0.193762 |
| VPS4A    | 0.154529 | 0.039443 | 0.078815 |
| VPS4B    | -0.10586 | 0.159631 | 0.248292 |
| VPS52    | 0.016971 | 0.8221   | 0.873998 |
| VPS53    | -0.46556 | 5.83E-11 | 1.76E-09 |
| VPS54    | -0.3502  | 1.65E-06 | 1.35E-05 |
| VPS72    | 0.19469  | 0.00921  | 0.023007 |
| VPS8     | -0.07867 | 0.296562 | 0.406433 |

|         |          |          |          |
|---------|----------|----------|----------|
| VRK1    | 0.06453  | 0.392129 | 0.504815 |
| VRK2    | 0.141256 | 0.060006 | 0.111613 |
| VRK3    | 0.084803 | 0.260392 | 0.367025 |
| VSIG10L | 0.287781 | 9.81E-05 | 0.000467 |
| VSIG10  | 0.213987 | 0.004129 | 0.011634 |
| VSIG1   | 0.441617 | 6.80E-10 | 1.52E-08 |
| VSIG2   | 0.643362 | 3.53E-22 | 2.05E-19 |
| VSIG4   | 0.022419 | 0.766436 | 0.833544 |
| VSIG8   | -0.12014 | 0.110177 | 0.184819 |
| VSNL1   | 0.167748 | 0.025211 | 0.054008 |
| VSTM1   | 0.152427 | 0.042236 | 0.083499 |
| VSTM2A  | -0.21674 | 0.003662 | 0.010485 |
| VSTM2B  | -0.12762 | 0.089579 | 0.155791 |
| VSTM2L  | 0.355997 | 1.08E-06 | 9.28E-06 |
| VSX1    | -0.08553 | 0.256303 | 0.362658 |
| VSX2    | -0.1114  | 0.138766 | 0.221971 |
| VT A1   | -0.15765 | 0.035588 | 0.072294 |
| VTCN1   | 0.190603 | 0.01082  | 0.026428 |
| VTI1A   | 0.216727 | 0.003664 | 0.010489 |
| VTI1B   | 0.201327 | 0.007044 | 0.018336 |
| VTN     | -0.23296 | 0.001752 | 0.005566 |
| VWA1    | 0.124845 | 0.096833 | 0.16617  |
| VWA2    | 0.346002 | 2.24E-06 | 1.75E-05 |
| VWA3A   | 0.231505 | 0.001876 | 0.005903 |
| VWA3B   | 0.118134 | 0.116299 | 0.192556 |
| VWA5A   | 0.06166  | 0.413568 | 0.525639 |
| VWA5B1  | 0.005971 | 0.936954 | 0.957213 |
| VWA5B2  | -0.26959 | 0.000274 | 0.001133 |
| VWC2L   | -0.22496 | 0.002536 | 0.007653 |
| VWC2    | -0.11115 | 0.139649 | 0.223055 |
| VWCE    | -0.09523 | 0.206078 | 0.305243 |
| VWDE    | -0.07127 | 0.344457 | 0.456773 |
| VWF     | -0.20039 | 0.007319 | 0.018922 |
| WAC     | -0.31324 | 2.07E-05 | 0.000122 |
| WAPAL   | -0.09408 | 0.211616 | 0.311857 |
| WARS2   | 0.071432 | 0.343376 | 0.455638 |
| WARS    | -0.09255 | 0.219176 | 0.320802 |
| WASF1   | -0.22032 | 0.003125 | 0.009145 |
| WASF2   | -0.16765 | 0.025298 | 0.054165 |
| WASF3   | -0.54928 | 2.04E-15 | 1.72E-13 |
| WASH2P  | 0.1005   | 0.18195  | 0.275657 |
| WASH3P  | 0.083513 | 0.267738 | 0.375291 |
| WASH5P  | 0.13073  | 0.081974 | 0.145143 |
| WASH7P  | 0.133863 | 0.074848 | 0.134537 |
| WASL    | -0.01772 | 0.814345 | 0.868557 |
| WAS     | 0.038293 | 0.611815 | 0.707363 |
| WBP11P1 | -0.22608 | 0.00241  | 0.007322 |
| WBP11   | -0.23121 | 0.001902 | 0.005972 |
| WBP1    | -0.00899 | 0.90521  | 0.933975 |
| WBP2NL  | 0.110135 | 0.143334 | 0.227708 |
| WBP2    | 0.048441 | 0.520805 | 0.626462 |
| WBP4    | -0.18784 | 0.012046 | 0.028974 |
| WBP5    | 0.039273 | 0.602734 | 0.698907 |
| WBSCR16 | 0.003168 | 0.96652  | 0.977194 |

|         |          |          |          |
|---------|----------|----------|----------|
| WBSCR17 | 0.061362 | 0.415836 | 0.52825  |
| WBSCR22 | 0.089169 | 0.236557 | 0.340467 |
| WBSCR26 | 0.585476 | 9.22E-18 | 1.50E-15 |
| WBSCR27 | -0.07871 | 0.29631  | 0.406256 |
| WBSCR28 | 0.017021 | 0.821587 | 0.873632 |
| WDFY1   | 0.190651 | 0.0108   | 0.026385 |
| WDFY2   | -0.43195 | 1.74E-09 | 3.43E-08 |
| WDFY3   | -0.3104  | 2.48E-05 | 0.000142 |
| WDFY4   | -0.00749 | 0.920933 | 0.945329 |
| WDHD1   | 0.054959 | 0.46623  | 0.576346 |
| WDR11   | 0.015877 | 0.8334   | 0.881904 |
| WDR12   | 0.134965 | 0.072463 | 0.130928 |
| WDR13   | 0.083799 | 0.266094 | 0.373571 |
| WDR16   | -0.27333 | 0.000223 | 0.000949 |
| WDR17   | -0.32097 | 1.25E-05 | 7.90E-05 |
| WDR18   | 0.176129 | 0.018687 | 0.041915 |
| WDR19   | -0.41529 | 8.21E-09 | 1.34E-07 |
| WDR1    | 0.2307   | 0.001947 | 0.006093 |
| WDR20   | -0.25876 | 0.000487 | 0.001861 |
| WDR24   | -0.08859 | 0.239631 | 0.34394  |
| WDR25   | -0.18709 | 0.012398 | 0.029671 |
| WDR26   | 0.047791 | 0.526416 | 0.631751 |
| WDR27   | 0.016205 | 0.830004 | 0.879641 |
| WDR31   | -0.37842 | 1.91E-07 | 2.06E-06 |
| WDR33   | -0.10032 | 0.18272  | 0.276612 |
| WDR34   | 0.116626 | 0.121066 | 0.198634 |
| WDR35   | -0.39799 | 3.77E-08 | 4.95E-07 |
| WDR36   | -0.24366 | 0.001047 | 0.00357  |
| WDR37   | -0.46233 | 8.21E-11 | 2.36E-09 |
| WDR38   | -0.03129 | 0.678459 | 0.763697 |
| WDR3    | 0.077459 | 0.304092 | 0.414505 |
| WDR41   | 0.01045  | 0.889894 | 0.923472 |
| WDR43   | 0.070776 | 0.347834 | 0.460287 |
| WDR44   | -0.02313 | 0.759286 | 0.828091 |
| WDR45L  | 0.005448 | 0.942462 | 0.961424 |
| WDR45   | 0.13295  | 0.076871 | 0.137502 |
| WDR46   | 0.181812 | 0.015146 | 0.035123 |
| WDR47   | -0.10814 | 0.150751 | 0.237263 |
| WDR48   | -0.25688 | 0.000537 | 0.002024 |
| WDR49   | -0.23257 | 0.001785 | 0.005656 |
| WDR4    | 0.216367 | 0.003722 | 0.010636 |
| WDR52   | -0.00871 | 0.90813  | 0.935767 |
| WDR53   | 0.178072 | 0.017403 | 0.039478 |
| WDR54   | -0.03582 | 0.635006 | 0.726714 |
| WDR55   | 0.333245 | 5.49E-06 | 3.86E-05 |
| WDR59   | 0.00856  | 0.909709 | 0.936857 |
| WDR5B   | -0.12821 | 0.088096 | 0.153765 |
| WDR5    | -0.33818 | 3.89E-06 | 2.85E-05 |
| WDR60   | -0.23755 | 0.001409 | 0.004617 |
| WDR61   | -0.11532 | 0.125329 | 0.204408 |
| WDR62   | 0.257422 | 0.000523 | 0.001973 |
| WDR63   | -0.30507 | 3.46E-05 | 0.000191 |
| WDR64   | 0.019967 | 0.791361 | 0.852355 |
| WDR65   | -0.22073 | 0.003069 | 0.009005 |

|         |          |          |          |
|---------|----------|----------|----------|
| WDR66   | -0.16416 | 0.028557 | 0.060034 |
| WDR67   | -0.07862 | 0.296877 | 0.406737 |
| WDR69   | 0.211269 | 0.004643 | 0.01285  |
| WDR6    | -0.27619 | 0.00019  | 0.000829 |
| WDR70   | -0.0519  | 0.49148  | 0.600021 |
| WDR72   | 0.186544 | 0.01266  | 0.030201 |
| WDR73   | -0.15752 | 0.035733 | 0.072538 |
| WDR74   | 0.318768 | 1.45E-05 | 8.95E-05 |
| WDR75   | 0.280882 | 0.000146 | 0.00066  |
| WDR76   | 0.094788 | 0.208189 | 0.307747 |
| WDR77   | 0.18589  | 0.012981 | 0.030833 |
| WDR78   | -0.34981 | 1.70E-06 | 1.38E-05 |
| WDR7    | -0.5359  | 1.27E-14 | 9.17E-13 |
| WDR81   | -0.25903 | 0.000481 | 0.001837 |
| WDR82   | -0.13151 | 0.08016  | 0.142428 |
| WDR83   | 0.092595 | 0.218956 | 0.320591 |
| WDR85   | -0.05293 | 0.482892 | 0.592095 |
| WDR86   | 0.064927 | 0.389215 | 0.501684 |
| WDR87   | -0.28903 | 9.12E-05 | 0.000439 |
| WDR88   | -0.24846 | 0.000826 | 0.00292  |
| WDR89   | -0.25066 | 0.000739 | 0.002656 |
| WDR8    | 0.21498  | 0.003955 | 0.011214 |
| WDR90   | 0.198379 | 0.007943 | 0.020313 |
| WDR91   | -0.11321 | 0.132433 | 0.213721 |
| WDR92   | -0.23308 | 0.001742 | 0.00554  |
| WDR93   | -0.09574 | 0.203642 | 0.302381 |
| WDSUB1  | -0.30044 | 4.61E-05 | 0.000245 |
| WDTC1   | -0.24663 | 0.000904 | 0.003152 |
| WDYHV1  | 0.123653 | 0.100087 | 0.170716 |
| WEE1    | -0.00029 | 0.996914 | 0.99757  |
| WEE2    | -0.22812 | 0.002194 | 0.006759 |
| WFDC10A | 0.032222 | 0.6694   | 0.756628 |
| WFDC10B | 0.358759 | 8.77E-07 | 7.74E-06 |
| WFDC11  | -0.01758 | 0.815875 | 0.869663 |
| WFDC12  | 0.374383 | 2.63E-07 | 2.72E-06 |
| WFDC13  | 0.182988 | 0.014491 | 0.033856 |
| WFDC1   | 0.001231 | 0.986993 | 0.990851 |
| WFDC2   | 0.464408 | 6.59E-11 | 1.95E-09 |
| WFDC3   | 0.365038 | 5.45E-07 | 5.13E-06 |
| WFDC5   | 0.279539 | 0.000158 | 0.000706 |
| WFDC6   | 0.14107  | 0.060347 | 0.112115 |
| WFDC8   | 0.022599 | 0.764616 | 0.83223  |
| WFDC9   | 0.056355 | 0.454963 | 0.565921 |
| WFIKKN1 | -0.23841 | 0.001352 | 0.004449 |
| WFIKKN2 | 0.074151 | 0.325274 | 0.437401 |
| WFS1    | 0.002391 | 0.974728 | 0.982679 |
| WHAMML1 | -0.07112 | 0.345482 | 0.457787 |
| WHAMML2 | -0.10164 | 0.177035 | 0.269615 |
| WHAMM   | 0.119934 | 0.110801 | 0.185598 |
| WHSC1L1 | 0.150232 | 0.045327 | 0.088615 |
| WHSC1   | -0.09382 | 0.212885 | 0.313405 |
| WHSC2   | 0.178175 | 0.017337 | 0.039342 |
| WIBG    | 0.22245  | 0.002841 | 0.008438 |
| WIF1    | 0.14215  | 0.058388 | 0.109116 |

|        |          |          |          |
|--------|----------|----------|----------|
| WIPF1  | 0.012686 | 0.866532 | 0.907612 |
| WIPF2  | 0.134848 | 0.072713 | 0.131285 |
| WIPF3  | -0.14364 | 0.055769 | 0.105176 |
| WIPI1  | -0.13589 | 0.070516 | 0.128031 |
| WIPI2  | -0.21211 | 0.004477 | 0.012445 |
| WISP1  | 0.041476 | 0.582531 | 0.681354 |
| WISP2  | -0.00407 | 0.957    | 0.97058  |
| WISP3  | 0.151393 | 0.04367  | 0.08589  |
| WIT1   | 0.021672 | 0.77401  | 0.839097 |
| WIZ    | 0.143283 | 0.056388 | 0.106101 |
| WLS    | -0.00677 | 0.928513 | 0.950528 |
| WNK1   | -0.23845 | 0.00135  | 0.004444 |
| WNK2   | -0.25757 | 0.000518 | 0.001961 |
| WNK3   | -0.46563 | 5.79E-11 | 1.74E-09 |
| WNK4   | -0.34018 | 3.39E-06 | 2.53E-05 |
| WNT10A | 0.538395 | 9.11E-15 | 6.76E-13 |
| WNT10B | -0.05064 | 0.502035 | 0.609145 |
| WNT11  | 0.2491   | 0.000799 | 0.002847 |
| WNT16  | 0.014887 | 0.843652 | 0.889585 |
| WNT1   | -0.08933 | 0.235732 | 0.3397   |
| WNT2B  | -0.17929 | 0.016636 | 0.038047 |
| WNT2   | 0.315291 | 1.81E-05 | 0.000109 |
| WNT3A  | 0.013667 | 0.856322 | 0.89973  |
| WNT3   | 0.098865 | 0.1892   | 0.284613 |
| WNT4   | -0.30562 | 3.35E-05 | 0.000186 |
| WNT5A  | 0.249647 | 0.000778 | 0.002779 |
| WNT5B  | 0.176401 | 0.018502 | 0.041552 |
| WNT6   | 0.057151 | 0.448605 | 0.559808 |
| WNT7A  | 0.559043 | 5.06E-16 | 5.03E-14 |
| WNT7B  | 0.474048 | 2.33E-11 | 7.60E-10 |
| WNT8A  | 0.018702 | 0.804301 | 0.861599 |
| WNT8B  | -0.27175 | 0.000243 | 0.001022 |
| WNT9A  | -0.13086 | 0.081661 | 0.144705 |
| WNT9B  | -0.17034 | 0.023007 | 0.049956 |
| WRAP53 | -0.25771 | 0.000515 | 0.001949 |
| WRB    | -0.36257 | 6.58E-07 | 6.06E-06 |
| WRNIP1 | -0.07835 | 0.298547 | 0.408545 |
| WRN    | -0.16375 | 0.028959 | 0.060776 |
| WSB1   | 0.126238 | 0.093136 | 0.160859 |
| WSB2   | -0.27898 | 0.000163 | 0.000724 |
| WSCD1  | -0.35454 | 1.20E-06 | 1.02E-05 |
| WSCD2  | 0.104483 | 0.165151 | 0.255313 |
| WT1    | 0.047094 | 0.532473 | 0.636655 |
| WTAP   | -0.25644 | 0.00055  | 0.002062 |
| WTIP   | 0.254318 | 0.000613 | 0.002259 |
| WWC1   | 0.158035 | 0.03513  | 0.071496 |
| WWC2   | 0.12384  | 0.09957  | 0.169981 |
| WWC3   | -0.156   | 0.037583 | 0.075603 |
| WVOX   | -0.32587 | 9.05E-06 | 5.95E-05 |
| WWP1   | 0.065553 | 0.384653 | 0.497425 |
| WWP2   | 0.115574 | 0.124478 | 0.203256 |
| WWTR1  | 0.08145  | 0.27978  | 0.388182 |
| XAB2   | 0.158462 | 0.034634 | 0.07064  |
| XAF1   | 0.477858 | 1.53E-11 | 5.21E-10 |

|          |          |          |          |
|----------|----------|----------|----------|
| XAGE1D   | -0.04262 | 0.572133 | 0.671894 |
| XAGE2    | 0.039277 | 0.602698 | 0.698907 |
| XAGE3    | 0.069434 | 0.357078 | 0.470285 |
| XBP1     | -0.46225 | 8.28E-11 | 2.38E-09 |
| XCL1     | -0.07446 | 0.323248 | 0.435238 |
| XCL2     | -0.11517 | 0.125818 | 0.205105 |
| XCR1     | -0.24751 | 0.000866 | 0.003037 |
| XDH      | 0.566528 | 1.69E-16 | 1.94E-14 |
| XG       | -0.11334 | 0.13197  | 0.213165 |
| XIAP     | -0.25149 | 0.000708 | 0.002558 |
| XIRP1    | 0.036972 | 0.624162 | 0.717886 |
| XIRP2    | -0.03438 | 0.648731 | 0.738133 |
| XIST     | 0.01819  | 0.809558 | 0.865214 |
| XKR3     | -0.08246 | 0.273816 | 0.381913 |
| XKR4     | -0.42403 | 3.68E-09 | 6.65E-08 |
| XKR5     | 0.229926 | 0.002019 | 0.006286 |
| XKR6     | 0.097947 | 0.193363 | 0.289714 |
| XKR7     | -0.36653 | 4.86E-07 | 4.62E-06 |
| XKR8     | -0.23156 | 0.001871 | 0.005891 |
| XKR9     | 0.312942 | 2.11E-05 | 0.000124 |
| XKRX     | 0.002677 | 0.971714 | 0.980941 |
| XKRY2    | 0.028655 | 0.704173 | 0.784292 |
| XK       | 0.042865 | 0.569949 | 0.669946 |
| XPA      | -0.04418 | 0.558188 | 0.659263 |
| XPC      | -0.30579 | 3.31E-05 | 0.000184 |
| XPNPEP1  | 0.144183 | 0.054841 | 0.103732 |
| XPNPEP2  | -0.21727 | 0.003578 | 0.010266 |
| XPNPEP3  | -0.18995 | 0.011099 | 0.027008 |
| XP01     | 0.154479 | 0.039507 | 0.078918 |
| XP04     | -0.22185 | 0.002919 | 0.008641 |
| XP05     | -0.20625 | 0.005744 | 0.015412 |
| XP06     | 0.005059 | 0.946569 | 0.963933 |
| XP07     | -0.11338 | 0.131836 | 0.212985 |
| XPOT     | -0.22343 | 0.002719 | 0.008123 |
| XPR1     | -0.22279 | 0.002798 | 0.008326 |
| XRCC1    | 0.148703 | 0.047592 | 0.092201 |
| XRCC2    | 0.142757 | 0.05731  | 0.107498 |
| XRCC3    | 0.22423  | 0.002622 | 0.007869 |
| XRCC4    | 0.262397 | 0.000403 | 0.001578 |
| XRCC5    | 0.308434 | 2.81E-05 | 0.000159 |
| XRCC6BP1 | -0.00541 | 0.942853 | 0.961575 |
| XRCC6    | 0.050957 | 0.499356 | 0.606639 |
| XRN1     | -0.13395 | 0.074654 | 0.134201 |
| XRN2     | -0.11942 | 0.112354 | 0.187642 |
| XRRA1    | 0.207212 | 0.005516 | 0.014871 |
| XYLB     | 0.117926 | 0.116947 | 0.19341  |
| XYLT1    | -0.10023 | 0.183113 | 0.277037 |
| XYLT2    | 0.197355 | 0.008278 | 0.021024 |
| YAF2     | -0.29259 | 7.39E-05 | 0.000366 |
| YAP1     | 0.326633 | 8.60E-06 | 5.68E-05 |
| YARS2    | 0.213905 | 0.004144 | 0.011667 |
| YARS     | 0.016966 | 0.822153 | 0.873998 |
| YBX1     | 0.085601 | 0.255913 | 0.362365 |
| YBX2     | -0.15817 | 0.034974 | 0.071215 |



|        |          |          |          |
|--------|----------|----------|----------|
| YDJC   | 0.254498 | 0.000608 | 0.002242 |
| YEATS2 | 0.072447 | 0.336546 | 0.448854 |
| YEATS4 | -0.30005 | 4.72E-05 | 0.00025  |
| YES1   | 0.120831 | 0.108136 | 0.182015 |
| YIF1A  | 0.193821 | 0.009534 | 0.023701 |
| YIF1B  | 0.238193 | 0.001366 | 0.004491 |
| YIPF1  | 0.259276 | 0.000475 | 0.001816 |
| YIPF2  | 0.016464 | 0.827337 | 0.87767  |
| YIPF3  | -0.04896 | 0.516373 | 0.622531 |
| YIPF4  | 0.224511 | 0.002588 | 0.007785 |
| YIPF5  | -0.06005 | 0.425859 | 0.538108 |
| YIPF6  | -0.13539 | 0.071555 | 0.129633 |
| YIPF7  | -0.20945 | 0.005017 | 0.013739 |
| YJEFN3 | 0.143301 | 0.056358 | 0.106057 |
| YKT6   | 0.038539 | 0.609534 | 0.705069 |
| YLPM1  | -0.32013 | 1.32E-05 | 8.28E-05 |
| YME1L1 | -0.04991 | 0.508214 | 0.614869 |
| YOD1   | 0.342081 | 2.96E-06 | 2.25E-05 |
| YPEL1  | -0.25505 | 0.000591 | 0.002189 |
| YPEL2  | -0.31908 | 1.42E-05 | 8.80E-05 |
| YPEL3  | 0.171475 | 0.022101 | 0.048254 |
| YPEL4  | 0.083366 | 0.268583 | 0.376157 |
| YPEL5  | 0.081416 | 0.279979 | 0.388376 |
| YRDC   | -0.27497 | 0.000204 | 0.000878 |
| YSK4   | -0.09187 | 0.222582 | 0.324621 |
| YTHDC1 | -0.31507 | 1.84E-05 | 0.00011  |
| YTHDC2 | -0.18387 | 0.014017 | 0.032878 |
| YTHDF1 | -0.05117 | 0.497565 | 0.605021 |
| YTHDF2 | -0.06505 | 0.388294 | 0.500888 |
| YTHDF3 | -0.24797 | 0.000846 | 0.002977 |
| YWHAB  | 0.207819 | 0.005376 | 0.014557 |
| YWHAE  | -0.27671 | 0.000185 | 0.000808 |
| YWHAG  | 0.027225 | 0.718294 | 0.795182 |
| YWHAH  | 0.134756 | 0.07291  | 0.131559 |
| YWHAQ  | -0.11684 | 0.120384 | 0.197878 |
| YWHAZ  | 0.359909 | 8.04E-07 | 7.20E-06 |
| YY1AP1 | 0.159611 | 0.033326 | 0.068438 |
| YY1    | 0.092196 | 0.220954 | 0.322827 |
| YY2    | -0.0803  | 0.286645 | 0.395763 |
| ZACN   | -0.01544 | 0.837928 | 0.885673 |
| ZADH2  | -0.41601 | 7.69E-09 | 1.26E-07 |
| ZAK    | 0.018087 | 0.810614 | 0.865968 |
| ZAN    | -0.28991 | 8.66E-05 | 0.00042  |
| ZAP70  | -0.0505  | 0.503209 | 0.610383 |
| ZAR1L  | 0.047876 | 0.52568  | 0.631021 |
| ZAR1   | 0.239066 | 0.00131  | 0.00433  |
| ZBBX   | -0.15897 | 0.034045 | 0.069653 |
| ZBED1  | -0.04235 | 0.574605 | 0.674196 |
| ZBED2  | 0.479922 | 1.22E-11 | 4.24E-10 |
| ZBED3  | -0.37486 | 2.53E-07 | 2.64E-06 |
| ZBED4  | -0.1504  | 0.045086 | 0.088219 |
| ZBED5  | 0.005256 | 0.944489 | 0.962598 |
| ZBP1   | 0.282541 | 0.000133 | 0.000609 |
| ZBTB10 | -0.41434 | 8.95E-09 | 1.44E-07 |

|         |          |          |          |
|---------|----------|----------|----------|
| ZBTB11  | -0.1706  | 0.022803 | 0.049583 |
| ZBTB12  | 0.01653  | 0.826651 | 0.877192 |
| ZBTB16  | -0.25432 | 0.000613 | 0.002259 |
| ZBTB17  | 0.153527 | 0.040754 | 0.08096  |
| ZBTB1   | 0.039455 | 0.601048 | 0.697448 |
| ZBTB20  | -0.10627 | 0.157984 | 0.246371 |
| ZBTB22  | -0.09909 | 0.188175 | 0.283265 |
| ZBTB24  | -0.41812 | 6.35E-09 | 1.07E-07 |
| ZBTB25  | -0.02999 | 0.691053 | 0.773688 |
| ZBTB26  | -0.13375 | 0.075102 | 0.134939 |
| ZBTB2   | -0.17401 | 0.020182 | 0.04475  |
| ZBTB32  | 0.026708 | 0.723426 | 0.799208 |
| ZBTB33  | -0.42128 | 4.75E-09 | 8.28E-08 |
| ZBTB34  | -0.10622 | 0.158205 | 0.246597 |
| ZBTB37  | -0.11014 | 0.143305 | 0.227681 |
| ZBTB38  | -0.08016 | 0.287474 | 0.396742 |
| ZBTB39  | -0.48263 | 8.97E-12 | 3.26E-10 |
| ZBTB3   | -0.13429 | 0.07392  | 0.133112 |
| ZBTB40  | -0.50624 | 5.64E-13 | 2.78E-11 |
| ZBTB41  | -0.14449 | 0.054325 | 0.102914 |
| ZBTB42  | -0.02889 | 0.701904 | 0.782382 |
| ZBTB43  | -0.10324 | 0.170279 | 0.261779 |
| ZBTB44  | -0.05583 | 0.459143 | 0.569758 |
| ZBTB45  | 0.150786 | 0.044531 | 0.08727  |
| ZBTB46  | -0.08629 | 0.252086 | 0.357946 |
| ZBTB47  | 0.052224 | 0.48874  | 0.597339 |
| ZBTB48  | -0.02838 | 0.70686  | 0.786576 |
| ZBTB49  | -0.28646 | 0.000106 | 0.0005   |
| ZBTB4   | -0.30493 | 3.49E-05 | 0.000192 |
| ZBTB5   | -0.2378  | 0.001392 | 0.004565 |
| ZBTB6   | -0.29203 | 7.65E-05 | 0.000376 |
| ZBTB7A  | 0.445812 | 4.48E-10 | 1.05E-08 |
| ZBTB7B  | 0.328026 | 7.83E-06 | 5.24E-05 |
| ZBTB7C  | 0.429569 | 2.18E-09 | 4.18E-08 |
| ZBTB8A  | 0.019601 | 0.795099 | 0.855262 |
| ZBTB8B  | -0.31281 | 2.13E-05 | 0.000125 |
| ZBTB8OS | 0.218927 | 0.003325 | 0.009635 |
| ZBTB9   | -0.25154 | 0.000707 | 0.002553 |
| ZC3H10  | -0.38027 | 1.64E-07 | 1.81E-06 |
| ZC3H11A | 0.03515  | 0.641355 | 0.732395 |
| ZC3H12A | 0.321446 | 1.21E-05 | 7.69E-05 |
| ZC3H12B | -0.27516 | 0.000201 | 0.000872 |
| ZC3H12C | -0.30612 | 3.24E-05 | 0.000181 |
| ZC3H12D | -0.13816 | 0.065899 | 0.120924 |
| ZC3H13  | -0.13821 | 0.065795 | 0.120768 |
| ZC3H14  | -0.40156 | 2.77E-08 | 3.80E-07 |
| ZC3H15  | 0.074232 | 0.324744 | 0.436806 |
| ZC3H18  | 0.113226 | 0.132369 | 0.213654 |
| ZC3H3   | 0.17799  | 0.017456 | 0.039571 |
| ZC3H4   | -0.12721 | 0.09062  | 0.157248 |
| ZC3H6   | -0.3865  | 9.89E-08 | 1.15E-06 |
| ZC3H7A  | -0.30509 | 3.46E-05 | 0.000191 |
| ZC3H7B  | -0.44899 | 3.26E-10 | 8.05E-09 |
| ZC3H8   | 0.019376 | 0.797405 | 0.857214 |

|          |          |          |          |
|----------|----------|----------|----------|
| ZC3HAV1L | -0.06849 | 0.363701 | 0.477007 |
| ZC3HAV1  | -0.31147 | 2.32E-05 | 0.000134 |
| ZC3HC1   | -0.12855 | 0.08725  | 0.152608 |
| ZC4H2    | -0.05428 | 0.47179  | 0.581835 |
| ZCCHC10  | -0.10423 | 0.166186 | 0.256651 |
| ZCCHC11  | -0.31311 | 2.09E-05 | 0.000123 |
| ZCCHC12  | -0.07024 | 0.351537 | 0.464256 |
| ZCCHC14  | -0.10081 | 0.1806   | 0.274032 |
| ZCCHC16  | -0.14148 | 0.059593 | 0.110949 |
| ZCCHC17  | -0.06659 | 0.377163 | 0.489789 |
| ZCCHC18  | -0.27032 | 0.000263 | 0.001095 |
| ZCCHC24  | 0.088577 | 0.239694 | 0.344006 |
| ZCCHC2   | -0.27906 | 0.000162 | 0.000723 |
| ZCCHC3   | -0.38281 | 1.34E-07 | 1.50E-06 |
| ZCCHC4   | -0.13778 | 0.066643 | 0.122064 |
| ZCCHC5   | 0.057901 | 0.44267  | 0.554396 |
| ZCCHC6   | 0.073759 | 0.327841 | 0.439715 |
| ZCCHC7   | -0.15845 | 0.034649 | 0.070656 |
| ZCCHC8   | -0.21959 | 0.003229 | 0.009402 |
| ZCCHC9   | 0.156199 | 0.037336 | 0.075227 |
| ZCRB1    | -0.0942  | 0.211042 | 0.311312 |
| ZCWPW1   | -0.08634 | 0.251837 | 0.35772  |
| ZCWPW2   | -0.44801 | 3.60E-10 | 8.71E-09 |
| ZDBF2    | -0.34416 | 2.55E-06 | 1.97E-05 |
| ZDHHC11  | 0.098513 | 0.190789 | 0.286523 |
| ZDHHC12  | 0.323198 | 1.08E-05 | 6.95E-05 |
| ZDHHC13  | 0.172089 | 0.021622 | 0.047363 |
| ZDHHC14  | -0.15507 | 0.038744 | 0.07756  |
| ZDHHC15  | -0.32555 | 9.24E-06 | 6.07E-05 |
| ZDHHC16  | 0.235447 | 0.001558 | 0.005033 |
| ZDHHC17  | -0.35092 | 1.57E-06 | 1.28E-05 |
| ZDHHC18  | 0.064058 | 0.39561  | 0.508304 |
| ZDHHC19  | 0.142472 | 0.057813 | 0.108268 |
| ZDHHC1   | -0.04342 | 0.564991 | 0.665604 |
| ZDHHC20  | -0.00111 | 0.988283 | 0.991643 |
| ZDHHC21  | -0.19823 | 0.007991 | 0.020427 |
| ZDHHC22  | -0.26087 | 0.000437 | 0.001693 |
| ZDHHC23  | -0.025   | 0.740451 | 0.812847 |
| ZDHHC24  | 0.217432 | 0.003552 | 0.010197 |
| ZDHHC2   | -0.06915 | 0.359047 | 0.472183 |
| ZDHHC3   | 0.535978 | 1.26E-14 | 9.10E-13 |
| ZDHHC4   | 0.005559 | 0.941296 | 0.960582 |
| ZDHHC5   | 0.446484 | 4.19E-10 | 9.95E-09 |
| ZDHHC6   | 0.364468 | 5.69E-07 | 5.32E-06 |
| ZDHHC7   | 0.528543 | 3.38E-14 | 2.20E-12 |
| ZDHHC8P1 | -0.14456 | 0.054208 | 0.102722 |
| ZDHHC8   | 0.075571 | 0.316069 | 0.427347 |
| ZDHHC9   | 0.276349 | 0.000188 | 0.000822 |
| ZEB1     | 0.019931 | 0.791729 | 0.852658 |
| ZEB2     | -0.12058 | 0.108881 | 0.182986 |
| ZER1     | -0.3435  | 2.68E-06 | 2.05E-05 |
| ZFAND1   | -0.07132 | 0.344104 | 0.456451 |
| ZFAND2A  | 0.144257 | 0.054716 | 0.103546 |
| ZFAND2B  | 0.174369 | 0.01992  | 0.044297 |

|           |          |          |          |
|-----------|----------|----------|----------|
| ZFAND3    | -0.1743  | 0.019973 | 0.044385 |
| ZFAND5    | -0.25778 | 0.000513 | 0.001942 |
| ZFAND6    | 0.203257 | 0.006505 | 0.017145 |
| ZFATAS    | -0.0887  | 0.239059 | 0.343244 |
| ZFAT      | -0.04445 | 0.555728 | 0.657313 |
| ZFC3H1    | 0.022307 | 0.767569 | 0.834455 |
| ZFHX3     | -0.20496 | 0.006061 | 0.016106 |
| ZFHX4     | 0.009485 | 0.9      | 0.9302   |
| ZFP106    | -0.36027 | 7.83E-07 | 7.04E-06 |
| ZFP112    | -0.02313 | 0.759261 | 0.828091 |
| ZFP14     | -0.31914 | 1.41E-05 | 8.77E-05 |
| ZFP161    | -0.29597 | 6.04E-05 | 0.000308 |
| ZFP1      | -0.26265 | 0.000397 | 0.001562 |
| ZFP28     | -0.24532 | 0.000965 | 0.003331 |
| ZFP2      | -0.31543 | 1.80E-05 | 0.000108 |
| ZFP30     | -0.21071 | 0.004754 | 0.013121 |
| ZFP36L1   | 0.36898  | 4.02E-07 | 3.94E-06 |
| ZFP36L2   | 0.353166 | 1.33E-06 | 1.11E-05 |
| ZFP36     | 0.174072 | 0.020136 | 0.044672 |
| ZFP37     | -0.16598 | 0.026811 | 0.05695  |
| ZFP3      | -0.47626 | 1.83E-11 | 6.14E-10 |
| ZFP41     | -0.18217 | 0.014945 | 0.034725 |
| ZFP42     | -0.24811 | 0.00084  | 0.002959 |
| ZFP57     | -0.01454 | 0.847233 | 0.892552 |
| ZFP62     | 0.071021 | 0.346169 | 0.458574 |
| ZFP64     | -0.09173 | 0.223301 | 0.325463 |
| ZFP82     | -0.24402 | 0.001029 | 0.003518 |
| ZFP90     | -0.12481 | 0.096937 | 0.166305 |
| ZFP91-CNT | -0.05142 | 0.495479 | 0.603375 |
| ZFP91     | 0.034946 | 0.643296 | 0.73379  |
| ZFP92     | -0.2364  | 0.001489 | 0.004836 |
| ZFPL1     | 0.33126  | 6.28E-06 | 4.35E-05 |
| ZFPM1     | 0.145344 | 0.052897 | 0.100618 |
| ZFPM2     | 0.100743 | 0.180889 | 0.274386 |
| ZFR2      | -0.10748 | 0.153274 | 0.240581 |
| ZFR       | -0.40113 | 2.87E-08 | 3.91E-07 |
| ZFX       | -0.35689 | 1.01E-06 | 8.74E-06 |
| ZFYVE16   | -0.20709 | 0.005545 | 0.014941 |
| ZFYVE19   | 0.334884 | 4.90E-06 | 3.50E-05 |
| ZFYVE1    | -0.21516 | 0.003924 | 0.011136 |
| ZFYVE20   | -0.22044 | 0.003109 | 0.009105 |
| ZFYVE21   | 0.48926  | 4.21E-12 | 1.66E-10 |
| ZFYVE26   | -0.21875 | 0.003351 | 0.009694 |
| ZFYVE27   | -0.01961 | 0.795037 | 0.855242 |
| ZFYVE28   | -0.04561 | 0.545495 | 0.648235 |
| ZFYVE9    | -0.43896 | 8.83E-10 | 1.91E-08 |
| ZFY       | -0.09317 | 0.216075 | 0.317176 |
| ZG16B     | 0.432608 | 1.63E-09 | 3.24E-08 |
| ZG16      | -0.10494 | 0.163286 | 0.253023 |
| ZGLP1     | 0.003045 | 0.967823 | 0.978061 |
| ZGPAT     | 0.218118 | 0.003446 | 0.009936 |
| ZHX1      | -0.27837 | 0.000168 | 0.000747 |
| ZHX2      | -0.02753 | 0.715268 | 0.792898 |
| ZHX3      | -0.46816 | 4.41E-11 | 1.38E-09 |

|          |          |          |          |
|----------|----------|----------|----------|
| ZIC1     | 0.04452  | 0.555135 | 0.656654 |
| ZIC2     | 0.252531 | 0.000672 | 0.00244  |
| ZIC3     | -0.10323 | 0.170287 | 0.261779 |
| ZIC4     | -0.07611 | 0.312616 | 0.423606 |
| ZIC5     | 0.132799 | 0.077209 | 0.13804  |
| ZIK1     | -0.34406 | 2.57E-06 | 1.98E-05 |
| ZIM2     | -0.32167 | 1.20E-05 | 7.59E-05 |
| ZKSCAN1  | -0.33084 | 6.47E-06 | 4.45E-05 |
| ZKSCAN2  | -0.49805 | 1.51E-12 | 6.73E-11 |
| ZKSCAN3  | -0.24146 | 0.001167 | 0.003921 |
| ZKSCAN4  | -0.15607 | 0.03749  | 0.075446 |
| ZKSCAN5  | -0.05998 | 0.426411 | 0.538596 |
| ZMAT1    | -0.30818 | 2.85E-05 | 0.000162 |
| ZMAT2    | 0.184301 | 0.01379  | 0.032447 |
| ZMAT3    | -0.18941 | 0.011336 | 0.027493 |
| ZMAT4    | -0.11339 | 0.13181  | 0.21296  |
| ZMAT5    | -0.0116  | 0.877915 | 0.915268 |
| ZMIZ1    | -0.38903 | 8.02E-08 | 9.65E-07 |
| ZMIZ2    | 0.17562  | 0.019037 | 0.042597 |
| ZMPSTE24 | -0.14998 | 0.045689 | 0.08916  |
| ZMYM1    | -0.00898 | 0.905263 | 0.933981 |
| ZMYM2    | 0.131382 | 0.080448 | 0.142864 |
| ZMYM3    | -0.20052 | 0.007281 | 0.018842 |
| ZMYM4    | -0.20755 | 0.005438 | 0.014691 |
| ZMYM5    | 0.21867  | 0.003363 | 0.009724 |
| ZMYM6    | -0.07033 | 0.350878 | 0.463478 |
| ZMYND10  | -0.08954 | 0.234617 | 0.338611 |
| ZMYND11  | -0.4321  | 1.72E-09 | 3.39E-08 |
| ZMYND12  | -0.20001 | 0.007434 | 0.019191 |
| ZMYND15  | 0.130068 | 0.083549 | 0.147315 |
| ZMYND17  | -0.08462 | 0.261395 | 0.36819  |
| ZMYND19  | 0.186651 | 0.012608 | 0.03011  |
| ZMYND8   | -0.12673 | 0.091856 | 0.159065 |
| ZNF100   | -0.23171 | 0.001858 | 0.005858 |
| ZNF101   | -0.14141 | 0.059721 | 0.111155 |
| ZNF107   | -0.25647 | 0.000549 | 0.002059 |
| ZNF10    | -0.3633  | 6.22E-07 | 5.76E-06 |
| ZNF114   | -0.01892 | 0.802065 | 0.86063  |
| ZNF117   | 0.124128 | 0.098779 | 0.16885  |
| ZNF121   | 0.097955 | 0.193326 | 0.289714 |
| ZNF124   | -0.19405 | 0.009446 | 0.023516 |
| ZNF12    | -0.16615 | 0.026658 | 0.05668  |
| ZNF131   | -0.26435 | 0.000363 | 0.001447 |
| ZNF132   | -0.34509 | 2.39E-06 | 1.86E-05 |
| ZNF133   | -0.01234 | 0.870133 | 0.910333 |
| ZNF134   | -0.10029 | 0.18285  | 0.276745 |
| ZNF135   | -0.19422 | 0.009386 | 0.023386 |
| ZNF136   | -0.25855 | 0.000493 | 0.00188  |
| ZNF137   | 0.043719 | 0.562285 | 0.663125 |
| ZNF138   | -0.04128 | 0.584297 | 0.682813 |
| ZNF140   | -0.32957 | 7.05E-06 | 4.78E-05 |
| ZNF141   | -0.29198 | 7.67E-05 | 0.000377 |
| ZNF142   | -0.16784 | 0.025133 | 0.053867 |
| ZNF143   | 0.027623 | 0.714362 | 0.79216  |

|         |          |          |          |
|---------|----------|----------|----------|
| ZNF146  | -0.02821 | 0.708526 | 0.787676 |
| ZNF148  | -0.19329 | 0.009736 | 0.024133 |
| ZNF14   | -0.30004 | 4.72E-05 | 0.00025  |
| ZNF154  | -0.18329 | 0.014325 | 0.033515 |
| ZNF155  | 0.030632 | 0.684814 | 0.769186 |
| ZNF157  | -0.32064 | 1.28E-05 | 8.04E-05 |
| ZNF160  | 0.067702 | 0.369229 | 0.48256  |
| ZNF165  | 0.231267 | 0.001897 | 0.005961 |
| ZNF167  | -0.15745 | 0.035822 | 0.072703 |
| ZNF169  | 0.161725 | 0.031029 | 0.064436 |
| ZNF16   | 0.018293 | 0.808505 | 0.864463 |
| ZNF174  | -0.20707 | 0.005548 | 0.014945 |
| ZNF175  | -0.13341 | 0.075851 | 0.135994 |
| ZNF177  | -0.15954 | 0.033402 | 0.068566 |
| ZNF17   | -0.24714 | 0.000882 | 0.003089 |
| ZNF180  | -0.29876 | 5.10E-05 | 0.000267 |
| ZNF181  | -0.41519 | 8.29E-09 | 1.35E-07 |
| ZNF182  | -0.14438 | 0.05451  | 0.103226 |
| ZNF184  | -0.25362 | 0.000636 | 0.002326 |
| ZNF185  | 0.591468 | 3.53E-18 | 6.66E-16 |
| ZNF187  | -0.29357 | 6.98E-05 | 0.000348 |
| ZNF189  | -0.25105 | 0.000725 | 0.00261  |
| ZNF18   | -0.18526 | 0.013296 | 0.031471 |
| ZNF192  | -0.23394 | 0.001673 | 0.005352 |
| ZNF193  | 0.163621 | 0.029086 | 0.061023 |
| ZNF195  | 0.072726 | 0.334679 | 0.446856 |
| ZNF197  | -0.16834 | 0.024695 | 0.053088 |
| ZNF19   | -0.12347 | 0.100598 | 0.17141  |
| ZNF200  | -0.19273 | 0.009954 | 0.024609 |
| ZNF202  | -0.00513 | 0.945817 | 0.963554 |
| ZNF204P | -0.25208 | 0.000688 | 0.002493 |
| ZNF205  | 0.22424  | 0.002621 | 0.007867 |
| ZNF207  | 0.354515 | 1.20E-06 | 1.02E-05 |
| ZNF208  | -0.02629 | 0.727544 | 0.802681 |
| ZNF20   | 0.106731 | 0.156194 | 0.244312 |
| ZNF211  | 0.099279 | 0.187343 | 0.282335 |
| ZNF212  | -0.12418 | 0.098644 | 0.168677 |
| ZNF213  | 0.168835 | 0.024267 | 0.052296 |
| ZNF214  | -0.13608 | 0.070116 | 0.127468 |
| ZNF215  | 0.128093 | 0.088388 | 0.154147 |
| ZNF217  | 0.143357 | 0.05626  | 0.10596  |
| ZNF219  | 0.151992 | 0.042834 | 0.084463 |
| ZNF221  | -0.16538 | 0.027379 | 0.057941 |
| ZNF222  | -0.20519 | 0.006003 | 0.015987 |
| ZNF223  | 0.041403 | 0.583195 | 0.682009 |
| ZNF224  | 0.089426 | 0.235202 | 0.339153 |
| ZNF225  | -0.17285 | 0.02104  | 0.04634  |
| ZNF226  | 0.069371 | 0.357516 | 0.470614 |
| ZNF227  | -0.17425 | 0.020008 | 0.044429 |
| ZNF229  | -0.03048 | 0.686284 | 0.769919 |
| ZNF22   | -0.36168 | 7.04E-07 | 6.43E-06 |
| ZNF230  | -0.13791 | 0.066387 | 0.121669 |
| ZNF232  | -0.26339 | 0.000382 | 0.001509 |
| ZNF233  | -0.19262 | 0.009998 | 0.02469  |

|         |          |          |          |
|---------|----------|----------|----------|
| ZNF234  | -0.03486 | 0.644136 | 0.734302 |
| ZNF235  | -0.20143 | 0.007015 | 0.018282 |
| ZNF236  | -0.38147 | 1.49E-07 | 1.66E-06 |
| ZNF238  | -0.04139 | 0.583327 | 0.682083 |
| ZNF239  | 0.272229 | 0.000237 | 0.001001 |
| ZNF23   | -0.15022 | 0.045345 | 0.088636 |
| ZNF248  | -0.27369 | 0.000219 | 0.000933 |
| ZNF24   | -0.54522 | 3.58E-15 | 2.88E-13 |
| ZNF250  | -0.05301 | 0.482241 | 0.591574 |
| ZNF251  | 0.013887 | 0.854031 | 0.897851 |
| ZNF252  | -0.26278 | 0.000395 | 0.001553 |
| ZNF253  | -0.43007 | 2.08E-09 | 4.00E-08 |
| ZNF254  | -0.25609 | 0.00056  | 0.002092 |
| ZNF256  | -0.04736 | 0.530181 | 0.634687 |
| ZNF257  | -0.07791 | 0.301258 | 0.4114   |
| ZNF259  | 0.440849 | 7.34E-10 | 1.62E-08 |
| ZNF25   | -0.32453 | 9.89E-06 | 6.43E-05 |
| ZNF260  | -0.12788 | 0.088915 | 0.154921 |
| ZNF263  | -0.0539  | 0.474845 | 0.584475 |
| ZNF264  | -0.16297 | 0.029737 | 0.062217 |
| ZNF266  | 0.02233  | 0.767336 | 0.834294 |
| ZNF267  | 0.258504 | 0.000494 | 0.001883 |
| ZNF268  | -0.3053  | 3.41E-05 | 0.000189 |
| ZNF26   | -0.00767 | 0.91905  | 0.943969 |
| ZNF271  | -0.43986 | 8.09E-10 | 1.76E-08 |
| ZNF273  | -0.04163 | 0.58114  | 0.679968 |
| ZNF274  | 0.267024 | 0.000314 | 0.001279 |
| ZNF275  | -0.45338 | 2.08E-10 | 5.36E-09 |
| ZNF276  | 0.275119 | 0.000202 | 0.000873 |
| ZNF277  | 0.057684 | 0.444384 | 0.55598  |
| ZNF280A | 0.073124 | 0.332039 | 0.444291 |
| ZNF280B | -0.32781 | 7.94E-06 | 5.30E-05 |
| ZNF280C | -0.33346 | 5.41E-06 | 3.81E-05 |
| ZNF280D | -0.22086 | 0.003051 | 0.008964 |
| ZNF281  | -0.16158 | 0.031182 | 0.064686 |
| ZNF282  | -0.06072 | 0.420753 | 0.532921 |
| ZNF283  | -0.00621 | 0.934476 | 0.955002 |
| ZNF284  | 0.147981 | 0.048692 | 0.09389  |
| ZNF285  | 0.120445 | 0.109276 | 0.183556 |
| ZNF286A | -0.38945 | 7.75E-08 | 9.35E-07 |
| ZNF286B | -0.36458 | 5.64E-07 | 5.29E-06 |
| ZNF287  | -0.42944 | 2.21E-09 | 4.23E-08 |
| ZNF28   | -0.02211 | 0.769567 | 0.835969 |
| ZNF292  | -0.22477 | 0.002558 | 0.007709 |
| ZNF295  | -0.35    | 1.68E-06 | 1.36E-05 |
| ZNF296  | 0.130383 | 0.082797 | 0.146273 |
| ZNF2    | -0.22541 | 0.002485 | 0.007517 |
| ZNF300  | 0.234968 | 0.001593 | 0.005136 |
| ZNF302  | -0.16195 | 0.030794 | 0.064031 |
| ZNF304  | -0.19923 | 0.007672 | 0.01971  |
| ZNF30   | -0.22987 | 0.002024 | 0.006297 |
| ZNF311  | 0.330112 | 6.80E-06 | 4.64E-05 |
| ZNF317  | -0.16625 | 0.02656  | 0.056503 |
| ZNF318  | -0.41483 | 8.56E-09 | 1.39E-07 |

|          |          |          |          |
|----------|----------|----------|----------|
| ZNF319   | -0.20189 | 0.006884 | 0.017998 |
| ZNF320   | -0.07804 | 0.30047  | 0.410608 |
| ZNF321   | 0.140208 | 0.06195  | 0.114711 |
| ZNF322A  | -0.32486 | 9.68E-06 | 6.31E-05 |
| ZNF322B  | -0.01553 | 0.83701  | 0.88494  |
| ZNF323   | -0.26633 | 0.000326 | 0.001318 |
| ZNF324B  | -0.24754 | 0.000864 | 0.003033 |
| ZNF324   | -0.31205 | 2.23E-05 | 0.00013  |
| ZNF326   | -0.22855 | 0.002151 | 0.006649 |
| ZNF329   | -0.09925 | 0.187479 | 0.282519 |
| ZNF32    | -0.03062 | 0.684946 | 0.769246 |
| ZNF330   | -0.16936 | 0.023826 | 0.051534 |
| ZNF331   | -0.27911 | 0.000161 | 0.000721 |
| ZNF333   | -0.19667 | 0.00851  | 0.021531 |
| ZNF334   | 0.108672 | 0.148758 | 0.234741 |
| ZNF335   | -0.07563 | 0.31571  | 0.427037 |
| ZNF337   | -0.07273 | 0.334653 | 0.446851 |
| ZNF33A   | -0.28259 | 0.000132 | 0.000608 |
| ZNF33B   | -0.04597 | 0.542339 | 0.645473 |
| ZNF341   | 0.30068  | 4.54E-05 | 0.000242 |
| ZNF343   | -0.08815 | 0.241959 | 0.346427 |
| ZNF345   | 0.001376 | 0.985454 | 0.989849 |
| ZNF346   | -0.28521 | 0.000114 | 0.000533 |
| ZNF347   | -0.2989  | 5.06E-05 | 0.000265 |
| ZNF34    | -0.1868  | 0.012538 | 0.029972 |
| ZNF350   | 0.018343 | 0.807984 | 0.864093 |
| ZNF354A  | -0.1691  | 0.024044 | 0.051888 |
| ZNF354B  | -0.00561 | 0.940733 | 0.960076 |
| ZNF354C  | -0.18899 | 0.011521 | 0.027867 |
| ZNF358   | 0.093528 | 0.214328 | 0.315102 |
| ZNF35    | -0.05741 | 0.446585 | 0.557817 |
| ZNF362   | -0.13815 | 0.065916 | 0.120945 |
| ZNF365   | 0.299527 | 4.87E-05 | 0.000257 |
| ZNF366   | -0.28152 | 0.000141 | 0.000641 |
| ZNF367   | -0.05803 | 0.441634 | 0.553449 |
| ZNF37A   | -0.3977  | 3.86E-08 | 5.06E-07 |
| ZNF37B   | -0.20377 | 0.006368 | 0.016828 |
| ZNF382   | -0.14765 | 0.04921  | 0.094758 |
| ZNF383   | 0.013289 | 0.860247 | 0.902799 |
| ZNF384   | -0.03111 | 0.680174 | 0.764886 |
| ZNF385A  | 0.235128 | 0.001581 | 0.005104 |
| ZNF385B  | -0.20986 | 0.00493  | 0.013535 |
| ZNF385D  | -0.11995 | 0.110755 | 0.185536 |
| ZNF389   | 0.253698 | 0.000633 | 0.002319 |
| ZNF391   | -0.31165 | 2.29E-05 | 0.000133 |
| ZNF394   | 0.302597 | 4.04E-05 | 0.000218 |
| ZNF395   | -0.16667 | 0.026182 | 0.055807 |
| ZNF396   | -0.40333 | 2.38E-08 | 3.35E-07 |
| ZNF397OS | -0.38751 | 9.09E-08 | 1.08E-06 |
| ZNF397   | -0.28955 | 8.85E-05 | 0.000428 |
| ZNF398   | -0.29962 | 4.85E-05 | 0.000256 |
| ZNF3     | -0.05864 | 0.436848 | 0.548425 |
| ZNF404   | 0.068574 | 0.363076 | 0.476312 |
| ZNF407   | -0.44659 | 4.15E-10 | 9.87E-09 |



|        |          |          |          |
|--------|----------|----------|----------|
| ZNF408 | 0.201325 | 0.007044 | 0.018336 |
| ZNF410 | 0.008402 | 0.911372 | 0.937886 |
| ZNF414 | -0.00575 | 0.939321 | 0.959111 |
| ZNF415 | -0.16482 | 0.027912 | 0.058891 |
| ZNF416 | -0.1839  | 0.014    | 0.032852 |
| ZNF417 | -0.23337 | 0.001719 | 0.00548  |
| ZNF418 | -0.15709 | 0.036247 | 0.073407 |
| ZNF419 | 0.091275 | 0.225623 | 0.32805  |
| ZNF41  | -0.21833 | 0.003414 | 0.009858 |
| ZNF420 | -0.26398 | 0.00037  | 0.001471 |
| ZNF423 | -0.05686 | 0.450963 | 0.561758 |
| ZNF425 | -0.09421 | 0.210968 | 0.311273 |
| ZNF426 | -0.19914 | 0.007701 | 0.019769 |
| ZNF428 | -0.07604 | 0.313066 | 0.423908 |
| ZNF429 | -0.25512 | 0.000589 | 0.002184 |
| ZNF430 | -0.19555 | 0.008898 | 0.022315 |
| ZNF431 | -0.0108  | 0.886235 | 0.920835 |
| ZNF432 | -0.1031  | 0.17085  | 0.262358 |
| ZNF433 | -0.24356 | 0.001053 | 0.003587 |
| ZNF434 | -0.12323 | 0.101261 | 0.172427 |
| ZNF436 | -0.18082 | 0.015718 | 0.036241 |
| ZNF438 | 0.368676 | 4.11E-07 | 4.02E-06 |
| ZNF439 | -0.16114 | 0.03165  | 0.065464 |
| ZNF43  | -0.23284 | 0.001762 | 0.005596 |
| ZNF440 | 0.231961 | 0.001836 | 0.005793 |
| ZNF441 | -0.3724  | 3.08E-07 | 3.13E-06 |
| ZNF442 | -0.16665 | 0.026197 | 0.055833 |
| ZNF443 | 0.028534 | 0.705366 | 0.785284 |
| ZNF444 | 0.078008 | 0.300668 | 0.410764 |
| ZNF445 | -0.35771 | 9.49E-07 | 8.28E-06 |
| ZNF446 | -0.0775  | 0.303866 | 0.414284 |
| ZNF449 | -0.142   | 0.05866  | 0.109531 |
| ZNF44  | -0.01415 | 0.851332 | 0.89601  |
| ZNF451 | -0.34306 | 2.76E-06 | 2.11E-05 |
| ZNF454 | -0.21008 | 0.004884 | 0.01343  |
| ZNF45  | -0.21601 | 0.003781 | 0.010784 |
| ZNF460 | -0.07033 | 0.35086  | 0.463478 |
| ZNF461 | -0.05154 | 0.494496 | 0.602587 |
| ZNF462 | -0.21766 | 0.003516 | 0.010113 |
| ZNF467 | -0.20329 | 0.006498 | 0.017128 |
| ZNF468 | -0.05223 | 0.488708 | 0.597336 |
| ZNF469 | 0.128802 | 0.086627 | 0.151751 |
| ZNF470 | -0.26629 | 0.000327 | 0.00132  |
| ZNF471 | -0.30516 | 3.45E-05 | 0.00019  |
| ZNF473 | -0.30255 | 4.05E-05 | 0.000219 |
| ZNF474 | 0.048089 | 0.523841 | 0.629309 |
| ZNF480 | 0.087801 | 0.243851 | 0.348504 |
| ZNF483 | -0.35784 | 9.39E-07 | 8.21E-06 |
| ZNF484 | -0.14312 | 0.056673 | 0.106514 |
| ZNF485 | 0.198734 | 0.007829 | 0.020054 |
| ZNF486 | -0.11445 | 0.1282   | 0.208114 |
| ZNF487 | -0.0255  | 0.735492 | 0.808832 |
| ZNF488 | 0.488784 | 4.45E-12 | 1.74E-10 |
| ZNF48  | -0.14488 | 0.053667 | 0.101854 |

|         |          |          |          |
|---------|----------|----------|----------|
| ZNF490  | -0.19219 | 0.010169 | 0.025051 |
| ZNF491  | -0.29604 | 6.02E-05 | 0.000307 |
| ZNF492  | -0.12906 | 0.085988 | 0.150765 |
| ZNF493  | -0.20442 | 0.006199 | 0.016441 |
| ZNF496  | -0.14319 | 0.056549 | 0.106342 |
| ZNF497  | -0.20277 | 0.006637 | 0.017448 |
| ZNF498  | -0.25409 | 0.000621 | 0.00228  |
| ZNF500  | -0.18114 | 0.015529 | 0.035858 |
| ZNF501  | -0.1642  | 0.028515 | 0.059958 |
| ZNF502  | -0.07127 | 0.344469 | 0.456773 |
| ZNF503  | 0.002704 | 0.97143  | 0.980804 |
| ZNF506  | -0.23038 | 0.001976 | 0.006173 |
| ZNF507  | -0.37812 | 1.95E-07 | 2.10E-06 |
| ZNF510  | -0.43618 | 1.16E-09 | 2.40E-08 |
| ZNF511  | 0.090316 | 0.230557 | 0.33397  |
| ZNF512B | -0.10109 | 0.179392 | 0.272534 |
| ZNF512  | 0.019203 | 0.799172 | 0.858616 |
| ZNF513  | 0.206089 | 0.005782 | 0.01549  |
| ZNF514  | 0.160775 | 0.032044 | 0.066169 |
| ZNF516  | -0.20442 | 0.006199 | 0.016441 |
| ZNF517  | -0.05949 | 0.430243 | 0.542129 |
| ZNF518A | 0.057178 | 0.448393 | 0.559649 |
| ZNF518B | -0.18038 | 0.015976 | 0.036772 |
| ZNF519  | -0.05229 | 0.488158 | 0.596776 |
| ZNF521  | 0.019889 | 0.792162 | 0.852845 |
| ZNF524  | 0.194355 | 0.009334 | 0.023277 |
| ZNF525  | 0.023474 | 0.755784 | 0.825125 |
| ZNF526  | 0.133463 | 0.075728 | 0.135838 |
| ZNF527  | -0.3379  | 3.97E-06 | 2.90E-05 |
| ZNF528  | 0.131514 | 0.080143 | 0.14241  |
| ZNF529  | -0.07607 | 0.312869 | 0.4238   |
| ZNF530  | 0.007968 | 0.915935 | 0.941552 |
| ZNF532  | 0.14784  | 0.04891  | 0.094227 |
| ZNF534  | 0.037722 | 0.617137 | 0.711611 |
| ZNF536  | -0.24693 | 0.000891 | 0.003115 |
| ZNF540  | -0.29584 | 6.09E-05 | 0.00031  |
| ZNF541  | -0.29391 | 6.84E-05 | 0.000342 |
| ZNF542  | -0.3077  | 2.94E-05 | 0.000166 |
| ZNF543  | -0.11822 | 0.116017 | 0.192207 |
| ZNF544  | 0.00153  | 0.983834 | 0.988784 |
| ZNF546  | -0.33817 | 3.90E-06 | 2.85E-05 |
| ZNF547  | -0.14257 | 0.05764  | 0.108023 |
| ZNF548  | -0.0966  | 0.199587 | 0.297321 |
| ZNF549  | -0.14506 | 0.053372 | 0.101351 |
| ZNF550  | -0.22682 | 0.002329 | 0.007114 |
| ZNF551  | -0.19864 | 0.007861 | 0.020124 |
| ZNF552  | 0.081968 | 0.276722 | 0.38464  |
| ZNF554  | -0.32536 | 9.36E-06 | 6.14E-05 |
| ZNF555  | -0.12349 | 0.100531 | 0.171312 |
| ZNF556  | -0.09547 | 0.204936 | 0.303893 |
| ZNF557  | -0.17236 | 0.021412 | 0.046992 |
| ZNF558  | 0.117984 | 0.116765 | 0.193165 |
| ZNF559  | -0.29294 | 7.24E-05 | 0.000359 |
| ZNF560  | -0.11967 | 0.111596 | 0.186691 |

|         |          |          |          |
|---------|----------|----------|----------|
| ZNF561  | -0.17537 | 0.01921  | 0.042923 |
| ZNF562  | -0.09655 | 0.199815 | 0.29757  |
| ZNF563  | -0.04599 | 0.542122 | 0.645371 |
| ZNF564  | -0.06647 | 0.378045 | 0.490763 |
| ZNF565  | 0.280704 | 0.000147 | 0.000666 |
| ZNF566  | -0.41322 | 9.90E-09 | 1.56E-07 |
| ZNF567  | -0.09008 | 0.231796 | 0.335348 |
| ZNF568  | -0.23986 | 0.001261 | 0.004197 |
| ZNF569  | -0.27035 | 0.000263 | 0.001094 |
| ZNF570  | -0.11224 | 0.135801 | 0.218107 |
| ZNF571  | -0.07693 | 0.307386 | 0.417864 |
| ZNF572  | -0.03634 | 0.6301   | 0.722657 |
| ZNF573  | -0.20107 | 0.007119 | 0.018477 |
| ZNF574  | 0.086743 | 0.249604 | 0.355058 |
| ZNF575  | 0.167577 | 0.025363 | 0.054283 |
| ZNF576  | 0.03723  | 0.621742 | 0.715838 |
| ZNF577  | 0.028563 | 0.705086 | 0.785132 |
| ZNF578  | -0.27879 | 0.000164 | 0.000732 |
| ZNF579  | 0.160314 | 0.032547 | 0.067057 |
| ZNF57   | 0.229806 | 0.00203  | 0.006315 |
| ZNF580  | 0.00851  | 0.910235 | 0.937197 |
| ZNF581  | 0.219582 | 0.00323  | 0.009403 |
| ZNF582  | -0.27939 | 0.000159 | 0.000711 |
| ZNF583  | -0.29159 | 7.85E-05 | 0.000385 |
| ZNF584  | -0.05979 | 0.427936 | 0.540024 |
| ZNF585A | -0.00732 | 0.922754 | 0.946495 |
| ZNF585B | -0.07176 | 0.341154 | 0.453481 |
| ZNF586  | 0.136403 | 0.069444 | 0.126375 |
| ZNF587  | 0.056975 | 0.450008 | 0.560815 |
| ZNF589  | -0.15011 | 0.045507 | 0.088901 |
| ZNF592  | -0.23409 | 0.001661 | 0.005324 |
| ZNF593  | 0.278584 | 0.000166 | 0.000738 |
| ZNF594  | -0.36879 | 4.08E-07 | 3.99E-06 |
| ZNF595  | -0.0211  | 0.779837 | 0.843341 |
| ZNF596  | -0.36029 | 7.81E-07 | 7.03E-06 |
| ZNF597  | 0.051566 | 0.494234 | 0.602453 |
| ZNF598  | 0.075137 | 0.318859 | 0.430589 |
| ZNF599  | -0.24786 | 0.000851 | 0.002991 |
| ZNF600  | 0.398843 | 3.50E-08 | 4.65E-07 |
| ZNF605  | -0.27462 | 0.000208 | 0.000893 |
| ZNF606  | -0.00641 | 0.932292 | 0.953391 |
| ZNF607  | -0.37384 | 2.75E-07 | 2.82E-06 |
| ZNF608  | -0.07178 | 0.34103  | 0.453376 |
| ZNF609  | -0.11166 | 0.137841 | 0.220791 |
| ZNF610  | -0.11713 | 0.119455 | 0.196761 |
| ZNF611  | -0.15946 | 0.033501 | 0.068733 |
| ZNF613  | 0.097758 | 0.194225 | 0.290801 |
| ZNF614  | -0.2646  | 0.000358 | 0.001431 |
| ZNF615  | -0.20229 | 0.006772 | 0.017752 |
| ZNF616  | -0.30708 | 3.06E-05 | 0.000171 |
| ZNF618  | -0.55411 | 1.03E-15 | 9.45E-14 |
| ZNF619  | -0.22605 | 0.002413 | 0.007332 |
| ZNF620  | -0.24938 | 0.000788 | 0.002812 |
| ZNF621  | -0.00026 | 0.997244 | 0.997799 |

|        |          |          |          |
|--------|----------|----------|----------|
| ZNF622 | -0.10047 | 0.182063 | 0.275786 |
| ZNF623 | -0.15363 | 0.040611 | 0.080733 |
| ZNF624 | -0.36159 | 7.09E-07 | 6.47E-06 |
| ZNF625 | -0.39493 | 4.89E-08 | 6.27E-07 |
| ZNF626 | -0.11475 | 0.1272   | 0.206857 |
| ZNF627 | -0.22421 | 0.002624 | 0.007876 |
| ZNF628 | 0.102581 | 0.173022 | 0.265056 |
| ZNF629 | 0.040033 | 0.59573  | 0.692961 |
| ZNF630 | -0.02335 | 0.757031 | 0.82624  |
| ZNF638 | -0.2027  | 0.006658 | 0.017494 |
| ZNF639 | -0.18327 | 0.014336 | 0.033535 |
| ZNF641 | -0.30759 | 2.96E-05 | 0.000167 |
| ZNF642 | 0.094695 | 0.208638 | 0.308295 |
| ZNF643 | -0.23595 | 0.001521 | 0.004929 |
| ZNF644 | -0.22258 | 0.002825 | 0.008395 |
| ZNF645 | 0.007594 | 0.91986  | 0.944359 |
| ZNF646 | -0.11675 | 0.120658 | 0.198243 |
| ZNF648 | -0.10138 | 0.178125 | 0.270941 |
| ZNF649 | -0.03677 | 0.626054 | 0.719618 |
| ZNF652 | -0.25917 | 0.000477 | 0.001826 |
| ZNF653 | 0.002588 | 0.972654 | 0.981489 |
| ZNF654 | -0.0047  | 0.950311 | 0.966397 |
| ZNF655 | -0.09024 | 0.230936 | 0.334398 |
| ZNF658 | -0.45892 | 1.17E-10 | 3.24E-09 |
| ZNF660 | -0.31344 | 2.04E-05 | 0.000121 |
| ZNF662 | 0.227629 | 0.002245 | 0.006896 |
| ZNF664 | -0.42006 | 5.31E-09 | 9.11E-08 |
| ZNF665 | -0.23588 | 0.001526 | 0.004942 |
| ZNF667 | -0.33517 | 4.80E-06 | 3.44E-05 |
| ZNF668 | 0.207564 | 0.005434 | 0.014685 |
| ZNF669 | -0.26407 | 0.000368 | 0.001465 |
| ZNF670 | -0.13334 | 0.076005 | 0.136208 |
| ZNF671 | -0.23327 | 0.001726 | 0.005498 |
| ZNF672 | -0.10025 | 0.183068 | 0.27699  |
| ZNF673 | -0.11732 | 0.118857 | 0.195955 |
| ZNF674 | -0.27712 | 0.000181 | 0.000792 |
| ZNF675 | -0.19385 | 0.009522 | 0.023678 |
| ZNF676 | -0.03133 | 0.678073 | 0.763392 |
| ZNF677 | -0.21595 | 0.00379  | 0.010807 |
| ZNF678 | -0.22698 | 0.002313 | 0.007071 |
| ZNF680 | -0.05231 | 0.48805  | 0.596684 |
| ZNF681 | -0.14672 | 0.05067  | 0.097059 |
| ZNF682 | -0.33004 | 6.83E-06 | 4.65E-05 |
| ZNF683 | 0.095526 | 0.204657 | 0.303615 |
| ZNF684 | -0.31853 | 1.47E-05 | 9.07E-05 |
| ZNF687 | -0.14927 | 0.046749 | 0.090815 |
| ZNF688 | 0.046872 | 0.534415 | 0.638097 |
| ZNF689 | -0.34158 | 3.07E-06 | 2.32E-05 |
| ZNF691 | -0.03078 | 0.683335 | 0.76783  |
| ZNF692 | 0.168458 | 0.024591 | 0.052919 |
| ZNF695 | 0.274737 | 0.000206 | 0.000888 |
| ZNF696 | -0.1934  | 0.009693 | 0.024056 |
| ZNF697 | -0.11099 | 0.14023  | 0.223838 |
| ZNF699 | -0.234   | 0.001668 | 0.005342 |

|         |          |          |          |
|---------|----------|----------|----------|
| ZNF69   | 0.307828 | 2.92E-05 | 0.000165 |
| ZNF700  | 0.267359 | 0.000309 | 0.001259 |
| ZNF701  | 0.05716  | 0.448539 | 0.559761 |
| ZNF702P | 0.008282 | 0.912629 | 0.938935 |
| ZNF703  | 0.190334 | 0.010934 | 0.02667  |
| ZNF704  | -0.22825 | 0.002182 | 0.006728 |
| ZNF705A | -0.18767 | 0.012125 | 0.029119 |
| ZNF705D | -0.01831 | 0.808335 | 0.864328 |
| ZNF706  | 0.184018 | 0.013939 | 0.032736 |
| ZNF707  | 0.102252 | 0.174412 | 0.266776 |
| ZNF708  | -0.28906 | 9.11E-05 | 0.000438 |
| ZNF709  | -0.45573 | 1.64E-10 | 4.35E-09 |
| ZNF70   | -0.30088 | 4.49E-05 | 0.000239 |
| ZNF710  | -0.18385 | 0.014027 | 0.032899 |
| ZNF711  | -0.10434 | 0.165722 | 0.256014 |
| ZNF713  | -0.376   | 2.31E-07 | 2.44E-06 |
| ZNF714  | -0.13741 | 0.067386 | 0.123207 |
| ZNF716  | -0.05248 | 0.486571 | 0.595387 |
| ZNF717  | -0.13405 | 0.07443  | 0.13387  |
| ZNF718  | -0.10197 | 0.175595 | 0.267959 |
| ZNF71   | -0.1896  | 0.011252 | 0.027323 |
| ZNF720  | -0.11226 | 0.135738 | 0.218077 |
| ZNF721  | -0.09584 | 0.203159 | 0.301801 |
| ZNF727  | -0.29223 | 7.56E-05 | 0.000372 |
| ZNF732  | -0.19087 | 0.010709 | 0.026194 |
| ZNF737  | -0.32418 | 1.01E-05 | 6.57E-05 |
| ZNF738  | -0.08293 | 0.271094 | 0.378922 |
| ZNF740  | -0.55364 | 1.10E-15 | 1.00E-13 |
| ZNF746  | -0.34033 | 3.35E-06 | 2.51E-05 |
| ZNF747  | -0.19138 | 0.010497 | 0.025759 |
| ZNF749  | -0.22325 | 0.00274  | 0.008175 |
| ZNF74   | -0.384   | 1.21E-07 | 1.38E-06 |
| ZNF750  | -0.06878 | 0.361651 | 0.474856 |
| ZNF75A  | -0.2211  | 0.003018 | 0.008895 |
| ZNF75D  | -0.26977 | 0.000271 | 0.001124 |
| ZNF761  | -0.19958 | 0.007565 | 0.019482 |
| ZNF763  | -0.09846 | 0.191025 | 0.28677  |
| ZNF764  | -0.07161 | 0.342172 | 0.454479 |
| ZNF765  | -0.15571 | 0.037947 | 0.076256 |
| ZNF766  | 0.052695 | 0.484816 | 0.593791 |
| ZNF767  | 0.012083 | 0.872824 | 0.912076 |
| ZNF768  | 0.214358 | 0.004063 | 0.011483 |
| ZNF76   | -0.23338 | 0.001717 | 0.005478 |
| ZNF770  | -0.10357 | 0.168906 | 0.259999 |
| ZNF771  | -0.07921 | 0.293235 | 0.402948 |
| ZNF772  | -0.1957  | 0.008847 | 0.022219 |
| ZNF773  | -0.03744 | 0.619786 | 0.713949 |
| ZNF774  | 0.134045 | 0.074449 | 0.13387  |
| ZNF775  | -0.16137 | 0.031408 | 0.065066 |
| ZNF776  | -0.28425 | 0.00012  | 0.000559 |
| ZNF777  | -0.12598 | 0.093813 | 0.161788 |
| ZNF778  | -0.31053 | 2.46E-05 | 0.000141 |
| ZNF77   | -0.18587 | 0.012989 | 0.030848 |
| ZNF780A | -0.12926 | 0.085513 | 0.150159 |

|         |          |          |          |
|---------|----------|----------|----------|
| ZNF780B | -0.26452 | 0.00036  | 0.001437 |
| ZNF781  | -0.25414 | 0.000619 | 0.002276 |
| ZNF782  | -0.30127 | 4.38E-05 | 0.000234 |
| ZNF784  | 0.047168 | 0.531828 | 0.635992 |
| ZNF785  | -0.0528  | 0.483925 | 0.592993 |
| ZNF786  | -0.20958 | 0.00499  | 0.013674 |
| ZNF787  | 0.182173 | 0.014942 | 0.034725 |
| ZNF788  | -0.12979 | 0.084219 | 0.148269 |
| ZNF789  | 0.067028 | 0.374024 | 0.487089 |
| ZNF790  | 0.01298  | 0.863465 | 0.905454 |
| ZNF791  | -0.23314 | 0.001738 | 0.005529 |
| ZNF792  | -0.02975 | 0.693424 | 0.77542  |
| ZNF793  | -0.18763 | 0.012142 | 0.029157 |
| ZNF799  | -0.06523 | 0.387023 | 0.499771 |
| ZNF79   | -0.45301 | 2.17E-10 | 5.55E-09 |
| ZNF7    | 0.036903 | 0.624811 | 0.718441 |
| ZNF800  | -0.24752 | 0.000865 | 0.003036 |
| ZNF804A | -0.08829 | 0.241231 | 0.345584 |
| ZNF804B | -0.2137  | 0.004182 | 0.011759 |
| ZNF805  | -0.01471 | 0.845469 | 0.89108  |
| ZNF808  | -0.02926 | 0.698208 | 0.77936  |
| ZNF80   | -0.06641 | 0.378465 | 0.491158 |
| ZNF813  | -0.25252 | 0.000672 | 0.002441 |
| ZNF814  | -0.21655 | 0.003692 | 0.010554 |
| ZNF815  | -0.03137 | 0.677606 | 0.76304  |
| ZNF816A | 0.072337 | 0.337277 | 0.449619 |
| ZNF81   | -0.21412 | 0.004105 | 0.011579 |
| ZNF821  | -0.21322 | 0.004269 | 0.011956 |
| ZNF823  | 0.195965 | 0.008753 | 0.022032 |
| ZNF826  | -0.00697 | 0.926445 | 0.948943 |
| ZNF827  | -0.20582 | 0.005847 | 0.015641 |
| ZNF828  | -0.17943 | 0.016549 | 0.037875 |
| ZNF829  | -0.24139 | 0.001171 | 0.003932 |
| ZNF830  | 0.054395 | 0.470821 | 0.580932 |
| ZNF831  | -0.28467 | 0.000118 | 0.000548 |
| ZNF833  | -0.25304 | 0.000655 | 0.002385 |
| ZNF835  | -0.22583 | 0.002437 | 0.007396 |
| ZNF836  | -0.1101  | 0.143452 | 0.227858 |
| ZNF837  | 0.017175 | 0.819995 | 0.872489 |
| ZNF839  | -0.2718  | 0.000242 | 0.001019 |
| ZNF83   | 0.149482 | 0.046426 | 0.090304 |
| ZNF841  | 0.057989 | 0.441974 | 0.553771 |
| ZNF843  | -0.37582 | 2.35E-07 | 2.47E-06 |
| ZNF844  | -0.2904  | 8.42E-05 | 0.000409 |
| ZNF845  | 0.001695 | 0.982084 | 0.987577 |
| ZNF846  | 0.185733 | 0.013058 | 0.031002 |
| ZNF84   | -0.32195 | 1.17E-05 | 7.47E-05 |
| ZNF853  | -0.26028 | 0.00045  | 0.001737 |
| ZNF85   | -0.26329 | 0.000384 | 0.001516 |
| ZNF860  | 0.236676 | 0.001469 | 0.004781 |
| ZNF862  | -0.25634 | 0.000553 | 0.00207  |
| ZNF876P | -0.17476 | 0.019637 | 0.043726 |
| ZNF878  | -0.05438 | 0.470907 | 0.581001 |
| ZNF879  | -0.14637 | 0.051231 | 0.097973 |

|           |          |          |          |
|-----------|----------|----------|----------|
| ZNF880    | 0.057484 | 0.445967 | 0.557355 |
| ZNF883    | -0.0252  | 0.738441 | 0.811264 |
| ZNF8      | -0.14297 | 0.056929 | 0.106916 |
| ZNF90     | 0.010425 | 0.890153 | 0.923644 |
| ZNF91     | -0.29135 | 7.96E-05 | 0.000389 |
| ZNF92     | -0.26051 | 0.000445 | 0.00172  |
| ZNF93     | -0.20375 | 0.006373 | 0.016838 |
| ZNF98     | -0.19195 | 0.010266 | 0.025242 |
| ZNF99     | -0.16929 | 0.02388  | 0.051617 |
| ZNFX1     | 0.253671 | 0.000634 | 0.002321 |
| ZNHIT1    | 0.26622  | 0.000328 | 0.001325 |
| ZNHIT2    | 0.141168 | 0.060166 | 0.111838 |
| ZNHIT3    | 0.131096 | 0.081115 | 0.143853 |
| ZNHIT6    | 0.067615 | 0.369843 | 0.48314  |
| ZNRD1     | 0.23263  | 0.001779 | 0.005643 |
| ZNRF1     | 0.324073 | 1.02E-05 | 6.61E-05 |
| ZNRF2     | -0.07233 | 0.337294 | 0.449619 |
| ZNRF3     | -0.24976 | 0.000773 | 0.002766 |
| ZNRF4     | -0.04766 | 0.527572 | 0.632625 |
| ZP1       | -0.06522 | 0.387065 | 0.499793 |
| ZP2       | -0.13907 | 0.064117 | 0.118061 |
| ZP3       | 0.24594  | 0.000936 | 0.003245 |
| ZP4       | 0.075865 | 0.314182 | 0.425145 |
| ZPBP2     | 0.047501 | 0.528932 | 0.63354  |
| ZPBP      | -0.21384 | 0.004156 | 0.011697 |
| ZPLD1     | 0.196073 | 0.008716 | 0.021957 |
| ZRANB1    | -0.46401 | 6.87E-11 | 2.03E-09 |
| ZRANB2    | 0.046683 | 0.536061 | 0.639598 |
| ZRANB3    | -0.37556 | 2.40E-07 | 2.52E-06 |
| ZRSR2     | 0.107641 | 0.152674 | 0.239734 |
| ZSCAN10   | -0.00232 | 0.975463 | 0.983119 |
| ZSCAN12P1 | -0.17347 | 0.020578 | 0.045494 |
| ZSCAN12   | -0.05574 | 0.459923 | 0.570404 |
| ZSCAN16   | 0.067162 | 0.373063 | 0.486221 |
| ZSCAN18   | -0.20325 | 0.006508 | 0.017149 |
| ZSCAN1    | -0.25852 | 0.000494 | 0.001881 |
| ZSCAN20   | -0.0246  | 0.744444 | 0.815864 |
| ZSCAN21   | -0.1244  | 0.098049 | 0.167892 |
| ZSCAN22   | -0.26582 | 0.000336 | 0.001349 |
| ZSCAN23   | -0.13735 | 0.06752  | 0.123395 |
| ZSCAN29   | -0.15845 | 0.034642 | 0.07065  |
| ZSCAN2    | -0.45174 | 2.46E-10 | 6.21E-09 |
| ZSCAN4    | 0.286596 | 0.000105 | 0.000496 |
| ZSCAN5A   | -0.37515 | 2.47E-07 | 2.59E-06 |
| ZSCAN5B   | -0.14082 | 0.060809 | 0.112852 |
| ZSWIM1    | 0.132966 | 0.076834 | 0.137502 |
| ZSWIM2    | -0.26886 | 0.000285 | 0.001174 |
| ZSWIM3    | -0.10656 | 0.156857 | 0.245113 |
| ZSWIM4    | 0.253957 | 0.000625 | 0.002294 |
| ZSWIM5    | -0.29607 | 6.01E-05 | 0.000306 |
| ZSWIM6    | 0.118033 | 0.116613 | 0.192979 |
| ZSWIM7    | -0.19408 | 0.009436 | 0.023497 |
| ZUFSP     | -0.17389 | 0.020269 | 0.044922 |
| ZW10      | 0.143326 | 0.056313 | 0.106021 |

|           |          |          |          |
|-----------|----------|----------|----------|
| ZWILCH    | 0.198679 | 0.007847 | 0.020096 |
| ZWINT     | 0.401152 | 2.87E-08 | 3.91E-07 |
| ZXDA      | -0.17718 | 0.017986 | 0.040581 |
| ZXDB      | -0.05493 | 0.466497 | 0.576568 |
| ZXDC      | -0.29915 | 4.99E-05 | 0.000262 |
| ZYG11A    | -0.19308 | 0.009816 | 0.024302 |
| ZYG11B    | -0.26652 | 0.000323 | 0.001308 |
| ZYX       | 0.44906  | 3.23E-10 | 8.00E-09 |
| ZZEF1     | -0.57142 | 8.11E-17 | 1.02E-14 |
| ZZZ3      | -0.29738 | 5.55E-05 | 0.000286 |
| psiTPTE22 | -0.06729 | 0.372183 | 0.485279 |
| tAKR      | -0.0132  | 0.861152 | 0.903556 |

---



**Supplementary Table 4** MMP28 correlated genes from cBioPortal

| Gene     | Cytoband | Spearman's Correlation | p-Value  | q-Value  |
|----------|----------|------------------------|----------|----------|
| KRT19    | 17q21.2  | 0.753135396            | 5.12E-34 | 1.02E-29 |
| VILL     | 3p22.2   | 0.733536292            | 1.68E-31 | 1.68E-27 |
| IL1RN    | 2q14.1   | 0.726842843            | 1.08E-30 | 7.19E-27 |
| ALDH3B1  | 11q13.2  | 0.721095139            | 5.11E-30 | 2.56E-26 |
| KCNN4    | 19q13.31 | 0.695932459            | 3.00E-27 | 1.20E-23 |
| PLCD3    | 17q21.31 | 0.692578411            | 6.69E-27 | 2.23E-23 |
| TRIP10   | 19p13.3  | 0.682185676            | 7.46E-26 | 2.13E-22 |
| C19ORF33 | 19q13.2  | 0.676354278            | 2.77E-25 | 6.91E-22 |
| ANXA2    | 15q22.2  | 0.675808173            | 3.12E-25 | 6.93E-22 |
| CLIC3    | 9q34.3   | 0.668206641            | 1.64E-24 | 3.28E-21 |
| ALS2CL   | 3p21.31  | 0.662584479            | 5.43E-24 | 9.87E-21 |
| ANXA2P2  | 9p13.3   | 0.656447597            | 1.95E-23 | 3.24E-20 |
| KRT16    | 17q21.2  | 0.655916723            | 2.17E-23 | 3.34E-20 |
| RRAS     | 19q13.33 | 0.654639801            | 2.82E-23 | 4.03E-20 |
| S100A6   | 1q21.3   | 0.649837842            | 7.46E-23 | 9.94E-20 |
| PITX1    | 5q31.1   | 0.649130965            | 8.59E-23 | 1.07E-19 |
| CRYBG2   | 1p36.11  | 0.648852342            | 9.09E-23 | 1.07E-19 |
| ADAMTSL5 | 19p13.3  | 0.644939636            | 1.97E-22 | 2.19E-19 |
| EPHA2    | 1p36.13  | 0.643981336            | 2.38E-22 | 2.51E-19 |
| SH2D3A   | 19p13.3  | 0.641683929            | 3.74E-22 | 3.73E-19 |
| TRIM29   | 11q23.3  | 0.640776181            | 4.46E-22 | 4.00E-19 |
| ITGA3    | 17q21.33 | 0.640767476            | 4.46E-22 | 4.00E-19 |
| KCP      | 7q32.1   | 0.640606365            | 4.60E-22 | 4.00E-19 |
| MSLN     | 16p13.3  | 0.63943883             | 5.77E-22 | 4.81E-19 |
| GAS2L2   | 17q12    | 0.636708689            | 9.75E-22 | 7.79E-19 |
| TMPRSS4  | 11q23.3  | 0.634527304            | 1.48E-21 | 1.10E-18 |
| SFTA2    | 6p21.33  | 0.634515271            | 1.48E-21 | 1.10E-18 |
| ARHGAP27 | 17q21.31 | 0.631104974            | 2.81E-21 | 2.01E-18 |
| S100A11  | 1q21.3   | 0.630904107            | 2.92E-21 | 2.01E-18 |
| ITGB4    | 17q25.1  | 0.630272216            | 3.29E-21 | 2.19E-18 |
| EPS8L1   | 19q13.42 | 0.628717595            | 4.39E-21 | 2.83E-18 |
| PDE4C    | 19p13.11 | 0.6282782              | 4.76E-21 | 2.97E-18 |
| MST1R    | 3p21.31  | 0.628098257            | 4.92E-21 | 2.98E-18 |
| RAPGEFL1 | 17q21.1  | 0.627181805            | 5.83E-21 | 3.43E-18 |
| GJB3     | 1p34.3   | 0.62613066             | 7.08E-21 | 4.04E-18 |
| JUP      | 17q21.2  | 0.621976022            | 1.51E-20 | 8.39E-18 |
| LPCAT4   | 15q14    | 0.620421401            | 2.00E-20 | 1.08E-17 |
| SSH3     | 11q13.2  | 0.620302136            | 2.04E-20 | 1.08E-17 |
| NMU      | 4q12     | 0.619332498            | 2.43E-20 | 1.23E-17 |
| SLPI     | 20q13.12 | 0.619268512            | 2.46E-20 | 1.23E-17 |
| LAMB3    | 1q32.2   | 0.619140878            | 2.52E-20 | 1.23E-17 |
| COL17A1  | 10q25.1  | 0.612282133            | 8.48E-20 | 4.04E-17 |
| GIPC1    | 19p13.12 | 0.611273617            | 1.01E-19 | 4.70E-17 |
| PSCA     | 8q24.3   | 0.609610194            | 1.35E-19 | 6.14E-17 |
| KRT13    | 17q21.2  | 0.609280219            | 1.43E-19 | 6.35E-17 |
| NTF4     | 19q13.33 | 0.609071267            | 1.48E-19 | 6.44E-17 |
| PLEKHN1  | 1p36.33  | 0.608059758            | 1.77E-19 | 7.51E-17 |
| ERBB2    | 17q12    | 0.607078442            | 2.09E-19 | 8.71E-17 |
| MISP     | 19p13.3  | 0.606002971            | 2.51E-19 | 1.03E-16 |
| EFNB1    | Xq13.1   | 0.604398134            | 3.31E-19 | 1.32E-16 |
| VASP     | 19q13.32 | 0.603393802            | 3.92E-19 | 1.51E-16 |
| MALL     | 2q13     | 0.603366602            | 3.94E-19 | 1.51E-16 |

|          |          |              |          |          |
|----------|----------|--------------|----------|----------|
| PPARG    | 3p25.2   | 0.60292093   | 4.25E-19 | 1.60E-16 |
| UNC93B1  | 11q13.2  | 0.601447911  | 5.45E-19 | 2.02E-16 |
| PERM1    | 1p36.33  | 0.600364384  | 6.54E-19 | 2.38E-16 |
| SFN      | 1p36.11  | 0.599460486  | 7.61E-19 | 2.71E-16 |
| JPT1     | 17q25.1  | 0.598629506  | 8.74E-19 | 3.06E-16 |
| P2RY2    | 11q13.4  | 0.597112548  | 1.12E-18 | 3.88E-16 |
| CAPN1    | 11q13.1  | 0.59606637   | 1.34E-18 | 4.53E-16 |
| S100A10  | 1q21.3   | 0.595649991  | 1.43E-18 | 4.77E-16 |
| C10RF116 | 1q32.1   | 0.594386207  | 1.76E-18 | 5.78E-16 |
| PPP1R13L | 19q13.32 | 0.593955182  | 1.89E-18 | 6.10E-16 |
| KRT7     | 12q13.13 | 0.591463185  | 2.84E-18 | 9.02E-16 |
| CSTB     | 21q22.3  | 0.590818739  | 3.16E-18 | 9.86E-16 |
| DOK4     | 16q21    | 0.590435838  | 3.36E-18 | 1.03E-15 |
| CLTB     | 5q35.2   | 0.587468876  | 5.42E-18 | 1.64E-15 |
| NECTIN4  | 1q23.3   | 0.586524484  | 6.31E-18 | 1.88E-15 |
| SLC16A5  | 17q25.1  | 0.585868223  | 7.01E-18 | 2.06E-15 |
| TSPO     | 22q13.2  | 0.584690227  | 8.45E-18 | 2.45E-15 |
| TMBIM1   | 2q35     | 0.584493545  | 8.72E-18 | 2.49E-15 |
| SLC44A2  | 19p13.2  | 0.584372188  | 8.89E-18 | 2.50E-15 |
| MVP      | 16p11.2  | 0.584129475  | 9.24E-18 | 2.56E-15 |
| UGT1A9   | 2q37.1   | 0.583901858  | 9.58E-18 | 2.62E-15 |
| KRT15    | 17q21.2  | 0.582543469  | 1.19E-17 | 3.21E-15 |
| TM4SF1   | 3q25.1   | 0.580396711  | 1.66E-17 | 4.43E-15 |
| PPP1R3G  | 6p25.1   | 0.578634947  | 2.19E-17 | 5.76E-15 |
| CAPN8    | 1q41     | 0.578465466  | 2.25E-17 | 5.84E-15 |
| AP1S3    | 2q36.1   | 0.578088841  | 2.38E-17 | 6.11E-15 |
| EPB41L1  | 20q11.23 | 0.577760341  | 2.51E-17 | 6.28E-15 |
| RHBDF1   | 16p13.3  | 0.577745695  | 2.51E-17 | 6.28E-15 |
| B3GNT3   | 19p13.11 | 0.577222606  | 2.73E-17 | 6.73E-15 |
| KLK10    | 19q13.41 | 0.57681699   | 2.90E-17 | 7.08E-15 |
| SCEL     | 13q22.3  | 0.576092608  | 3.25E-17 | 7.82E-15 |
| SDCBP2   | 20p13    | 0.575944176  | 3.32E-17 | 7.91E-15 |
| RHOD     | 11q13.2  | 0.575488042  | 3.56E-17 | 8.30E-15 |
| PKP3     | 11p15.5  | 0.575473396  | 3.57E-17 | 8.30E-15 |
| VSIG2    | 11q24.2  | 0.575276714  | 3.68E-17 | 8.46E-15 |
| RAC1     | 7p22.1   | 0.574831042  | 3.94E-17 | 8.96E-15 |
| PTK6     | 20q13.33 | 0.573847635  | 4.59E-17 | 1.03E-14 |
| USP22    | 17p11.2  | -0.573326638 | 4.97E-17 | 1.10E-14 |
| PADI1    | 1p36.13  | 0.573252512  | 5.02E-17 | 1.10E-14 |
| PLCB3    | 11q13.1  | 0.572956291  | 5.26E-17 | 1.14E-14 |
| CBX5     | 12q13.13 | -0.572397631 | 5.72E-17 | 1.23E-14 |
| GPR39    | 2q21.2   | 0.57110874   | 6.96E-17 | 1.48E-14 |
| ANXA11   | 10q22.3  | 0.570834641  | 7.26E-17 | 1.53E-14 |
| SDC1     | 2p24.1   | 0.567585211  | 1.18E-16 | 2.47E-14 |
| SCML2    | Xp22.13  | -0.5670956   | 1.27E-16 | 2.63E-14 |
| ID1      | 20q11.21 | 0.56669596   | 1.35E-16 | 2.76E-14 |
| CTTN     | 11q13.3  | 0.566248195  | 1.45E-16 | 2.92E-14 |
| RPS6KA4  | 11q13.1  | 0.565471931  | 1.62E-16 | 3.25E-14 |
| SERPINB5 | 18q21.33 | 0.565376548  | 1.65E-16 | 3.26E-14 |
| LMO7     | 13q22.2  | 0.564155839  | 1.97E-16 | 3.87E-14 |
| SIRT7    | 17q25.3  | 0.564051221  | 2.01E-16 | 3.89E-14 |
| CGB7     | 19q13.33 | 0.56399123   | 2.02E-16 | 3.89E-14 |
| LIME1    | 20q13.33 | 0.563620195  | 2.14E-16 | 4.07E-14 |
| CYP4F12  | 19p13.12 | 0.563261651  | 2.25E-16 | 4.25E-14 |

|            |           |              |          |          |
|------------|-----------|--------------|----------|----------|
| GSDMB      | 17q21.1   | 0.562764422  | 2.43E-16 | 4.53E-14 |
| EZR        | 6q25.3    | 0.562467307  | 2.53E-16 | 4.69E-14 |
| RHOC       | 1p13.2    | 0.560406336  | 3.43E-16 | 6.29E-14 |
| COX6B2     | 19q13.42  | 0.560337288  | 3.46E-16 | 6.30E-14 |
| TNK2       | 3q29      | 0.560073651  | 3.60E-16 | 6.48E-14 |
| CAPG       | 2p11.2    | 0.559872785  | 3.71E-16 | 6.62E-14 |
| GPRC5A     | 12p13.1   | 0.559253447  | 4.06E-16 | 7.18E-14 |
| EVPL       | 17q25.1   | 0.558221915  | 4.72E-16 | 8.27E-14 |
| ACY1       | 3p21.2    | 0.558002218  | 4.87E-16 | 8.46E-14 |
| SMCR8      | 17p11.2   | -0.557788798 | 5.02E-16 | 8.65E-14 |
| PLEK2      | 14q23.3-c | 0.557123428  | 5.53E-16 | 9.45E-14 |
| RARG       | 12q13.13  | 0.556269747  | 6.26E-16 | 1.06E-13 |
| PTTG1IP    | 21q22.3   | 0.555619024  | 6.87E-16 | 1.15E-13 |
| LGALS3     | 14q22.3   | 0.555332371  | 7.16E-16 | 1.19E-13 |
| STXBP2     | 19p13.2   | 0.555093842  | 7.41E-16 | 1.22E-13 |
| LAD1       | 1q32.1    | 0.554782081  | 7.75E-16 | 1.27E-13 |
| LEMD1      | 1q32.1    | 0.553337825  | 9.53E-16 | 1.55E-13 |
| NGEF       | 2q37.1    | 0.552771326  | 1.03E-15 | 1.67E-13 |
| FAM83A     | 8q24.13   | 0.552586951  | 1.06E-15 | 1.69E-13 |
| S100A16    | 1q21.3    | 0.552574645  | 1.06E-15 | 1.69E-13 |
| FXYD5      | 19q13.12  | 0.55217082   | 1.13E-15 | 1.77E-13 |
| CBLC       | 19q13.32  | 0.551808842  | 1.19E-15 | 1.84E-13 |
| FGFBP1     | 4p15.32   | 0.551781825  | 1.19E-15 | 1.84E-13 |
| ARNT2      | 15q25.1   | -0.551561944 | 1.23E-15 | 1.89E-13 |
| TMEM92     | 17q21.33  | 0.551072333  | 1.32E-15 | 2.01E-13 |
| FAM83A-AS1 | 8q24.13   | 0.550681758  | 1.39E-15 | 2.11E-13 |
| ANXA3      | 4q21.21   | 0.550178896  | 1.49E-15 | 2.24E-13 |
| EPHX4      | 1p22.1    | 0.549722763  | 1.59E-15 | 2.38E-13 |
| TINAGL1    | 1p35.2    | 0.549231059  | 1.71E-15 | 2.53E-13 |
| PLBD1      | 12p13.1   | 0.548931852  | 1.78E-15 | 2.62E-13 |
| DNM2       | 19p13.2   | 0.548463164  | 1.90E-15 | 2.78E-13 |
| WNT7A      | 3p25.1    | 0.548359491  | 1.93E-15 | 2.80E-13 |
| INF2       | 14q32.33  | 0.546893897  | 2.37E-15 | 3.41E-13 |
| TRAF4      | 17q11.2   | 0.546780909  | 2.41E-15 | 3.44E-13 |
| MYEOV      | 11q13.3   | 0.545929606  | 2.71E-15 | 3.82E-13 |
| LOC388242  | 16p11.2   | 0.54592932   | 2.71E-15 | 3.82E-13 |
| GJB4       | 1p34.3    | 0.545863709  | 2.74E-15 | 3.83E-13 |
| TRIP6      | 7q22.1    | 0.545303706  | 2.96E-15 | 4.11E-13 |
| UNC119B    | 12q24.31  | -0.545111209 | 3.04E-15 | 4.19E-13 |
| PHLDA2     | 11p15.4   | 0.544498148  | 3.31E-15 | 4.53E-13 |
| FLNB       | 3p14.3    | 0.544458393  | 3.33E-15 | 4.53E-13 |
| PLAAT3     | 11q12.3-c | 0.544293097  | 3.41E-15 | 4.60E-13 |
| LRRC8E     | 19p13.2   | 0.542979097  | 4.08E-15 | 5.48E-13 |
| MUC1       | 1q22      | 0.542847279  | 4.16E-15 | 5.54E-13 |
| MROH6      | 8q24.3    | 0.542627581  | 4.29E-15 | 5.68E-13 |
| OSBPL7     | 17q21.32  | 0.542338836  | 4.46E-15 | 5.85E-13 |
| TRIM54     | 2p23.3    | 0.542308586  | 4.48E-15 | 5.85E-13 |
| FXYD3      | 19q13.12  | 0.542144247  | 4.58E-15 | 5.95E-13 |
| ZDHHC3     | 3p21.31   | 0.542008244  | 4.67E-15 | 6.02E-13 |
| MYH14      | 19q13.33  | 0.541229887  | 5.20E-15 | 6.66E-13 |
| XDH        | 2p23.1    | 0.54108133   | 5.30E-15 | 6.75E-13 |
| CKLF       | 16q21     | 0.540692152  | 5.59E-15 | 7.05E-13 |
| PRR15      | 7p14.3    | 0.540671228  | 5.61E-15 | 7.05E-13 |
| WASF3      | 13q12.13  | -0.540612642 | 5.66E-15 | 7.06E-13 |

|           |          |              |          |          |
|-----------|----------|--------------|----------|----------|
| C11ORF80  | 11q13.2  | 0.540577355  | 5.68E-15 | 7.06E-13 |
| LRRRC8A   | 9q34.11  | 0.539915887  | 6.22E-15 | 7.68E-13 |
| S100P     | 4p16.1   | 0.538574687  | 7.47E-15 | 9.16E-13 |
| DGKA      | 12q13.2  | 0.538461699  | 7.59E-15 | 9.24E-13 |
| CNOT6L    | 4q21.1   | -0.53823154  | 7.83E-15 | 9.48E-13 |
| CLCN1     | 7q34     | 0.538057227  | 8.01E-15 | 9.65E-13 |
| CLIC1     | 6p21.33  | 0.537687527  | 8.43E-15 | 1.01E-12 |
| KLF5      | 13q22.1  | 0.53746783   | 8.68E-15 | 1.03E-12 |
| SH3RF2    | 5q32     | 0.537404294  | 8.76E-15 | 1.04E-12 |
| BIK       | 22q13.2  | 0.5365179    | 9.87E-15 | 1.16E-12 |
| REV3L     | 6q21     | -0.53623334  | 1.03E-14 | 1.20E-12 |
| SRI       | 7q21.12  | 0.536162199  | 1.04E-14 | 1.20E-12 |
| ETHE1     | 19q13.31 | 0.536074321  | 1.05E-14 | 1.21E-12 |
| ABHD11-AS | 7q11.23  | 0.535846254  | 1.08E-14 | 1.24E-12 |
| C11ORF86  | 11q13.2  | 0.535794472  | 1.09E-14 | 1.24E-12 |
| ARL14     | 3q25.33  | 0.535751126  | 1.09E-14 | 1.24E-12 |
| SPRR1B    | 1q21.3   | 0.535124241  | 1.19E-14 | 1.35E-12 |
| BCL2L1    | 20q11.21 | 0.534774967  | 1.25E-14 | 1.40E-12 |
| CDH3      | 16q22.1  | 0.534473668  | 1.30E-14 | 1.45E-12 |
| PIAS2     | 18q21.1  | -0.534389973 | 1.31E-14 | 1.46E-12 |
| HDAC4     | 2q37.3   | -0.534358588 | 1.32E-14 | 1.46E-12 |
| FA2H      | 16q23.1  | 0.533749712  | 1.43E-14 | 1.57E-12 |
| TRPM4     | 19q13.33 | 0.533203607  | 1.54E-14 | 1.68E-12 |
| FOXL1     | 16q24.1  | 0.53312619   | 1.56E-14 | 1.69E-12 |
| TMEM268   | 9q32     | -0.532732827 | 1.64E-14 | 1.77E-12 |
| ARMC2     | 6q21     | -0.532672149 | 1.65E-14 | 1.78E-12 |
| SOX21     | 13q32.1  | 0.532643844  | 1.66E-14 | 1.78E-12 |
| FAM83H    | 8q24.3   | 0.531994225  | 1.81E-14 | 1.93E-12 |
| TDRP      | 8p23.3   | -0.531523445 | 1.93E-14 | 2.04E-12 |
| PSORS1C2  | 6p21.33  | 0.530341551  | 2.26E-14 | 2.37E-12 |
| ABCC3     | 17q21.33 | 0.530194798  | 2.30E-14 | 2.41E-12 |
| UNC13D    | 17q25.1  | 0.530044149  | 2.35E-14 | 2.44E-12 |
| UGT1A10   | 2q37.1   | 0.529571041  | 2.50E-14 | 2.59E-12 |
| FOXQ1     | 6p25.3   | 0.529382964  | 2.56E-14 | 2.64E-12 |
| STK24     | 13q32.2  | 0.529008432  | 2.69E-14 | 2.75E-12 |
| PKM       | 15q23    | 0.528981232  | 2.70E-14 | 2.75E-12 |
| METTL16   | 17p13.3  | -0.528433034 | 2.90E-14 | 2.94E-12 |
| TMC7      | 16p12.3  | 0.528326324  | 2.94E-14 | 2.97E-12 |
| ZNF185    | Xq28     | 0.528135919  | 3.02E-14 | 3.03E-12 |
| ZNF740    | 12q13.13 | -0.527886929 | 3.12E-14 | 3.12E-12 |
| TSPAN1    | 1p34.1   | 0.527759295  | 3.17E-14 | 3.15E-12 |
| PRDX5     | 11q13.1  | 0.527181805  | 3.42E-14 | 3.38E-12 |
| PCDH1     | 5q31.3   | 0.527114849  | 3.45E-14 | 3.40E-12 |
| CABP4     | 11q13.2  | 0.52692026   | 3.54E-14 | 3.47E-12 |
| TMEM139   | 7q34     | 0.526382525  | 3.80E-14 | 3.70E-12 |
| GSTP1     | 11q13.2  | 0.526246521  | 3.87E-14 | 3.74E-12 |
| KLHL15    | Xp22.11  | -0.526225598 | 3.88E-14 | 3.74E-12 |
| ATG2B     | 14q32.2  | -0.524729563 | 4.71E-14 | 4.53E-12 |
| ANXA8     | 10q11.22 | 0.52469046   | 4.73E-14 | 4.53E-12 |
| TMEM44    | 3q29     | 0.524317369  | 4.97E-14 | 4.72E-12 |
| TRADD     | 16q22.1  | 0.524304815  | 4.98E-14 | 4.72E-12 |
| SMAD4     | 18q21.2  | -0.523913544 | 5.24E-14 | 4.94E-12 |
| FER1L4    | 20q11.22 | 0.523476241  | 5.54E-14 | 5.20E-12 |
| ANO1      | 11q13.3  | 0.522704162  | 6.12E-14 | 5.72E-12 |

|          |           |              |          |          |
|----------|-----------|--------------|----------|----------|
| LSR      | 19q13.12  | 0.522266859  | 6.48E-14 | 6.02E-12 |
| IL20RB   | 3q22.3    | 0.522225012  | 6.51E-14 | 6.03E-12 |
| TRIM16   | 17p12     | 0.521513611  | 7.14E-14 | 6.58E-12 |
| WDR7     | 18q21.31  | -0.519126232 | 9.69E-14 | 8.89E-12 |
| PRSS22   | 16p13.3   | 0.51900069   | 9.85E-14 | 8.99E-12 |
| SPECC1L  | 22q11.23  | -0.518241165 | 1.09E-13 | 9.86E-12 |
| ZNF24    | 18q12.2   | -0.518188856 | 1.09E-13 | 9.88E-12 |
| PPP3CB   | 10q22.2   | -0.517609273 | 1.18E-13 | 1.06E-11 |
| ZZEF1    | 17p13.2   | -0.517586257 | 1.18E-13 | 1.06E-11 |
| CASD1    | 7q21.3    | -0.517487917 | 1.19E-13 | 1.07E-11 |
| GNA15    | 19p13.3   | 0.517305882  | 1.22E-13 | 1.09E-11 |
| EPM2A    | 6q24.3    | -0.517274496 | 1.23E-13 | 1.09E-11 |
| RHBDL2   | 1p34.3    | 0.516939719  | 1.28E-13 | 1.13E-11 |
| PRRC2B   | 9q34.13   | -0.516326659 | 1.38E-13 | 1.21E-11 |
| PLAAT2   | 11q12.3   | 0.516261832  | 1.39E-13 | 1.22E-11 |
| ZBTB40   | 1p36.12   | -0.516180194 | 1.41E-13 | 1.22E-11 |
| BEAN1    | 16q21     | 0.515868433  | 1.47E-13 | 1.27E-11 |
| ELMO2    | 20q13.12  | -0.515485531 | 1.54E-13 | 1.33E-11 |
| CATSPER1 | 11q13.1   | 0.514591318  | 1.72E-13 | 1.48E-11 |
| TACSTD2  | 1p32.1    | 0.514495847  | 1.74E-13 | 1.49E-11 |
| CARD11   | 7p22.2    | 0.514359843  | 1.77E-13 | 1.51E-11 |
| POU5F1   | 6p21.33   | 0.5134957    | 1.98E-13 | 1.67E-11 |
| USP13    | 3q26.33   | -0.513386898 | 2.00E-13 | 1.69E-11 |
| TRIM7    | 5q35.3    | 0.512870086  | 2.14E-13 | 1.79E-11 |
| NAGS     | 17q21.31  | 0.512824054  | 2.15E-13 | 1.80E-11 |
| KRT17    | 17q21.2   | 0.512564602  | 2.22E-13 | 1.85E-11 |
| FAM172A  | 5q15      | -0.511867847 | 2.42E-13 | 2.01E-11 |
| MAN1A1   | 6q22.31   | -0.511708828 | 2.47E-13 | 2.04E-11 |
| MEAK7    | 16q24.1   | 0.511145984  | 2.65E-13 | 2.18E-11 |
| CAPNS1   | 19q13.12  | 0.510438767  | 2.89E-13 | 2.37E-11 |
| ZBTB39   | 12q13.3   | -0.510181407 | 2.99E-13 | 2.44E-11 |
| CDR2L    | 17q25.1   | 0.509137321  | 3.40E-13 | 2.76E-11 |
| PRPF8    | 17p13.3   | -0.509007595 | 3.45E-13 | 2.79E-11 |
| ONECUT3  | 19p13.3   | 0.508846432  | 3.52E-13 | 2.84E-11 |
| HSF2     | 6q22.31   | -0.508700019 | 3.59E-13 | 2.88E-11 |
| BAIAP2L1 | 7q21.3-q2 | 0.508543092  | 3.66E-13 | 2.92E-11 |
| TMEM170B | 6p24.2    | -0.508492876 | 3.68E-13 | 2.93E-11 |
| HS3ST1   | 4p15.33   | 0.508306656  | 3.77E-13 | 2.99E-11 |
| SEMA3B   | 3p21.31   | 0.508032557  | 3.89E-13 | 3.08E-11 |
| PML      | 15q24.1   | 0.50751156   | 4.15E-13 | 3.27E-11 |
| RPGR     | Xp11.4    | -0.507363003 | 4.23E-13 | 3.31E-11 |
| PRXL2B   | 1p36.32   | 0.507270939  | 4.28E-13 | 3.34E-11 |
| PLEC     | 8q24.3    | 0.506350302  | 4.79E-13 | 3.72E-11 |
| SLC16A3  | 17q25.3   | 0.506185006  | 4.89E-13 | 3.78E-11 |
| MUCL3    | 6p21.33   | 0.506055129  | 4.96E-13 | 3.83E-11 |
| TP53I3   | 2p23.3    | 0.506021802  | 4.98E-13 | 3.83E-11 |
| PARP11   | 12p13.32  | -0.505580315 | 5.26E-13 | 4.03E-11 |
| S100A5   | 1q21.3    | 0.505484343  | 5.32E-13 | 4.06E-11 |
| MLPH     | 2q37.3    | 0.505463143  | 5.34E-13 | 4.06E-11 |
| SH2D4A   | 8p21.3    | 0.505270646  | 5.46E-13 | 4.14E-11 |
| CAPN5    | 11q13.5   | 0.504688971  | 5.86E-13 | 4.42E-11 |
| TBX6     | 16p11.2   | 0.504656804  | 5.89E-13 | 4.42E-11 |
| BLVRB    | 19q13.2   | 0.504454627  | 6.03E-13 | 4.52E-11 |
| FAM120C  | Xp11.22   | -0.503931538 | 6.43E-13 | 4.80E-11 |

|           |           |              |          |          |
|-----------|-----------|--------------|----------|----------|
| SIK3      | 11q23.3   | -0.50389806  | 6.46E-13 | 4.80E-11 |
| KIF1B     | 1p36.22   | -0.50356956  | 6.72E-13 | 4.97E-11 |
| LAMC2     | 1q25.3    | 0.503464943  | 6.80E-13 | 5.02E-11 |
| SPRR3     | 1q21.3    | 0.503224842  | 7.01E-13 | 5.15E-11 |
| KLK11     | 19q13.41  | 0.503053287  | 7.15E-13 | 5.24E-11 |
| POLD4     | 11q13.2   | 0.502931392  | 7.26E-13 | 5.28E-11 |
| FLJ23867  | 1q25.2    | 0.502923022  | 7.27E-13 | 5.28E-11 |
| HIPK2     | 7q34      | -0.502883267 | 7.30E-13 | 5.29E-11 |
| ZKSCAN2   | 16p12.1   | -0.502715879 | 7.45E-13 | 5.38E-11 |
| STXBP1    | 9q34.11   | -0.501811981 | 8.31E-13 | 5.98E-11 |
| IFI27     | 14q32.12  | 0.501609022  | 8.52E-13 | 6.10E-11 |
| MTMR12    | 5p13.3    | -0.501443726 | 8.69E-13 | 6.18E-11 |
| PPM1J     | 1p13.2    | 0.501441634  | 8.69E-13 | 6.18E-11 |
| OCIAD2    | 4p11      | 0.501284707  | 8.86E-13 | 6.26E-11 |
| EFNA4     | 1q21.3    | 0.501282615  | 8.86E-13 | 6.26E-11 |
| CTSE      | 1q32.1    | 0.50077208   | 9.42E-13 | 6.63E-11 |
| FUT3      | 19p13.3   | 0.500590045  | 9.63E-13 | 6.75E-11 |
| HERC1     | 15q22.31  | -0.500493796 | 9.74E-13 | 6.81E-11 |
| ANGEL1    | 14q24.3   | -0.500330592 | 9.93E-13 | 6.92E-11 |
| TMX4      | 20p12.3   | -0.499970707 | 1.04E-12 | 7.20E-11 |
| OSBPL3    | 7p15.3    | 0.499372293  | 1.11E-12 | 7.71E-11 |
| TSHZ1     | 18q22.3   | -0.499186073 | 1.14E-12 | 7.85E-11 |
| CACNB2    | 10p12.33- | -0.499125395 | 1.15E-12 | 7.88E-11 |
| RHOF      | 12q24.31  | 0.498993576  | 1.17E-12 | 7.98E-11 |
| MYL12B    | 18p11.31  | 0.498740401  | 1.20E-12 | 8.20E-11 |
| SLC2A1    | 1p34.2    | 0.498485134  | 1.24E-12 | 8.42E-11 |
| S100A2    | 1q21.3    | 0.49839307   | 1.25E-12 | 8.49E-11 |
| LY6E      | 8q24.3    | 0.497750717  | 1.35E-12 | 9.13E-11 |
| LHB       | 19q13.33  | 0.497604102  | 1.38E-12 | 9.26E-11 |
| LDLR      | 19p13.2   | 0.497164857  | 1.45E-12 | 9.72E-11 |
| ANXA2P1   | 4q31.3    | 0.496570627  | 1.56E-12 | 1.04E-10 |
| PLLP      | 16q13     | 0.496170987  | 1.63E-12 | 1.09E-10 |
| RAB25     | 1q22      | 0.496053815  | 1.65E-12 | 1.10E-10 |
| TICAM1    | 19p13.3   | 0.495913628  | 1.68E-12 | 1.11E-10 |
| KLHL42    | 12p11.22  | -0.495827841 | 1.70E-12 | 1.12E-10 |
| ITGB6     | 2q24.2    | 0.495787031  | 1.71E-12 | 1.12E-10 |
| MGAT4B    | 5q35.3    | 0.495719038  | 1.72E-12 | 1.13E-10 |
| SLC4A11   | 20p13     | 0.495610236  | 1.74E-12 | 1.14E-10 |
| PSMG3-AS1 | 17p22.3   | -0.495537003 | 1.76E-12 | 1.14E-10 |
| PAFAH1B1  | 17p13.3   | -0.49551608  | 1.76E-12 | 1.14E-10 |
| TBC1D14   | 4p16.1    | -0.49493022  | 1.89E-12 | 1.22E-10 |
| KRT8      | 12q13.13  | 0.493743854  | 2.17E-12 | 1.40E-10 |
| NAPRT     | 8q24.3    | 0.493704099  | 2.18E-12 | 1.40E-10 |
| IGSF9     | 1q23.2    | 0.492911096  | 2.39E-12 | 1.53E-10 |
| EHBP1L1   | 11q13.1   | 0.492894357  | 2.40E-12 | 1.53E-10 |
| CCDC153   | 11q23.3   | 0.492572134  | 2.49E-12 | 1.59E-10 |
| PDE1C     | 7p14.3    | -0.492339078 | 2.56E-12 | 1.62E-10 |
| GTF2IRD1  | 7q11.23   | 0.492254096  | 2.59E-12 | 1.64E-10 |
| APOL1     | 22q12.3   | 0.492164124  | 2.61E-12 | 1.65E-10 |
| DTNA      | 18q12.1   | -0.491754023 | 2.74E-12 | 1.72E-10 |
| SERINC2   | 1p35.2    | 0.491647312  | 2.78E-12 | 1.74E-10 |
| ASAP2     | 2p25.1 2f | 0.491548972  | 2.81E-12 | 1.75E-10 |
| CBX6      | 22q13.1   | -0.491205825 | 2.92E-12 | 1.82E-10 |
| ELMO1     | 7p14.2-p1 | -0.491191179 | 2.93E-12 | 1.82E-10 |

|           |           |              |          |          |
|-----------|-----------|--------------|----------|----------|
| TJP3      | 19p13.3   | 0.491107484  | 2.96E-12 | 1.83E-10 |
| OCEL1     | 19p13.11  | 0.490682736  | 3.11E-12 | 1.92E-10 |
| NPAS3     | 14q13.1   | -0.490515347 | 3.17E-12 | 1.95E-10 |
| NUCB2     | 11p15.1   | -0.48986044  | 3.42E-12 | 2.09E-10 |
| SDK1      | 7p22.2    | -0.489847886 | 3.42E-12 | 2.09E-10 |
| SEMA4B    | 15q26.1   | 0.489787207  | 3.45E-12 | 2.10E-10 |
| KATNAL2   | 18q21.1   | -0.489552863 | 3.54E-12 | 2.15E-10 |
| MYLIP     | 6p22.3    | -0.489427322 | 3.59E-12 | 2.17E-10 |
| TWF2      | 3p21.2    | 0.489418953  | 3.60E-12 | 2.17E-10 |
| SOGA1     | 20q11.23  | -0.489343628 | 3.63E-12 | 2.18E-10 |
| MBOAT2    | 2p25.1    | 0.489314335  | 3.64E-12 | 2.19E-10 |
| KRBA2     | 17p13.1   | -0.489226456 | 3.68E-12 | 2.20E-10 |
| NCALD     | 8q22.3    | -0.48920344  | 3.69E-12 | 2.20E-10 |
| WNT10A    | 2q35      | 0.489169962  | 3.70E-12 | 2.20E-10 |
| SELENOP   | 5p12      | -0.488824723 | 3.85E-12 | 2.29E-10 |
| IL18      | 11q23.1   | 0.488709644  | 3.91E-12 | 2.31E-10 |
| MYRF      | 11q12.2   | 0.488646873  | 3.93E-12 | 2.32E-10 |
| ZCWPW2    | 3p24.1    | -0.488500408 | 4.00E-12 | 2.35E-10 |
| ARMCX3    | Xq22.1    | -0.488115414 | 4.18E-12 | 2.45E-10 |
| MAP2K4    | 17p12     | -0.488090306 | 4.19E-12 | 2.45E-10 |
| SYT8      | 11p15.5   | 0.487977883  | 4.25E-12 | 2.48E-10 |
| LINC02693 | 17p11.2   | -0.487828762 | 4.32E-12 | 2.51E-10 |
| ULK2      | 17p11.2   | -0.487824577 | 4.33E-12 | 2.51E-10 |
| RELA      | 11q13.1   | 0.487014835  | 4.75E-12 | 2.74E-10 |
| MMEL1     | 1p36.32   | 0.486911518  | 4.80E-12 | 2.77E-10 |
| PLAC8     | 4q21.22   | 0.486544055  | 5.01E-12 | 2.88E-10 |
| SYNE1     | 6q25.2    | -0.486305526 | 5.15E-12 | 2.95E-10 |
| ZFYVE21   | 14q32.33  | 0.486219739  | 5.20E-12 | 2.97E-10 |
| SETBP1    | 18q12.3   | -0.486161153 | 5.24E-12 | 2.98E-10 |
| VMP1      | 17q23.1   | 0.48606909   | 5.29E-12 | 3.01E-10 |
| SEC14L2   | 22q12.2   | 0.48558994   | 5.59E-12 | 3.17E-10 |
| EHD1      | 11q13.1   | 0.485317934  | 5.77E-12 | 3.25E-10 |
| CD58      | 1p13.1    | 0.48529701   | 5.78E-12 | 3.25E-10 |
| JMY       | 5q14.1    | -0.484773921 | 6.14E-12 | 3.45E-10 |
| CGB5      | 19q13.33  | 0.484744463  | 6.16E-12 | 3.45E-10 |
| EPG5      | 18q12.3-c | -0.484472622 | 6.35E-12 | 3.55E-10 |
| ACADM     | 1p31.1    | -0.484315695 | 6.47E-12 | 3.60E-10 |
| LAMA3     | 18q11.2   | 0.484165045  | 6.58E-12 | 3.65E-10 |
| RAB8A     | 19p13.11  | 0.483907685  | 6.77E-12 | 3.75E-10 |
| ARRDC1    | 9q34.3    | 0.483798883  | 6.86E-12 | 3.79E-10 |
| MYO19     | 17q12     | 0.483227669  | 7.32E-12 | 4.03E-10 |
| CCDC149   | 4p15.2    | -0.483190007 | 7.35E-12 | 4.03E-10 |
| INPP4B    | 4q31.21   | 0.48317536   | 7.36E-12 | 4.03E-10 |
| TNFRSF12A | 16p13.3   | 0.482968217  | 7.54E-12 | 4.12E-10 |
| HES1      | 3q29      | 0.482901262  | 7.59E-12 | 4.14E-10 |
| SDR16C5   | 8q12.1    | 0.482649096  | 7.82E-12 | 4.24E-10 |
| ELMO3     | 16q22.1   | 0.482522545  | 7.93E-12 | 4.29E-10 |
| VAMP8     | 2p11.2    | 0.48241165   | 8.03E-12 | 4.34E-10 |
| CYSRT1    | 9q34.3    | 0.48229177   | 8.14E-12 | 4.38E-10 |
| ATG16L1   | 2q37.1    | 0.481442889  | 8.96E-12 | 4.81E-10 |
| SLC23A2   | 20p13     | -0.481380118 | 9.02E-12 | 4.83E-10 |
| TTLL11    | 9q33.2    | -0.481329902 | 9.07E-12 | 4.85E-10 |
| PARP3     | 3p21.2    | 0.481172975  | 9.23E-12 | 4.92E-10 |
| STAMBP    | 2p13.1    | 0.481032787  | 9.38E-12 | 4.99E-10 |

|           |           |              |          |          |
|-----------|-----------|--------------|----------|----------|
| SLC23A3   | 2q35      | 0.480758689  | 9.68E-12 | 5.13E-10 |
| TMEM38B   | 9q31.2    | -0.480723118 | 9.72E-12 | 5.14E-10 |
| KCNK1     | 1q42.2    | 0.480668717  | 9.78E-12 | 5.16E-10 |
| RNF39     | 6p22.1    | 0.480624778  | 9.82E-12 | 5.17E-10 |
| LGI2      | 4p15.2    | -0.480562007 | 9.89E-12 | 5.19E-10 |
| ECM1      | 1q21.2    | 0.479760634  | 1.08E-11 | 5.66E-10 |
| UBAC2     | 13q32.3   | 0.479706233  | 1.09E-11 | 5.68E-10 |
| LIFR      | 5p13.1    | -0.479595338 | 1.10E-11 | 5.74E-10 |
| ZNF618    | 9q32      | -0.479532568 | 1.11E-11 | 5.77E-10 |
| OASL      | 12q24.31  | 0.479453058  | 1.12E-11 | 5.80E-10 |
| NCOA5     | 20q13.12  | -0.47942795  | 1.12E-11 | 5.80E-10 |
| AHNAK2    | 14q32.33  | 0.479407026  | 1.13E-11 | 5.80E-10 |
| PPM1N     | 19q13.32  | 0.479260561  | 1.15E-11 | 5.88E-10 |
| SP4       | 7p15.3    | -0.479166405 | 1.16E-11 | 5.93E-10 |
| RIC8B     | 12q23.3   | -0.479118281 | 1.16E-11 | 5.95E-10 |
| DMBX1     | 1p33      | 0.478961476  | 1.18E-11 | 6.04E-10 |
| GPRIN3    | 4q22.1    | -0.478860921 | 1.20E-11 | 6.09E-10 |
| CGB3      | 19q13.33  | 0.478251852  | 1.28E-11 | 6.49E-10 |
| PERP      | 6q23.3    | 0.478241583  | 1.28E-11 | 6.49E-10 |
| TMEM105   | 17q25.3   | 0.478123387  | 1.30E-11 | 6.56E-10 |
| PHLDA3    | 1q32.1    | 0.478099303  | 1.30E-11 | 6.56E-10 |
| LINC00520 | 14q22.3   | 0.478087369  | 1.31E-11 | 6.56E-10 |
| SLC30A4   | 15q21.1 1 | -0.478055364 | 1.31E-11 | 6.56E-10 |
| RCHY1     | 4q21.1    | -0.477844036 | 1.34E-11 | 6.70E-10 |
| LEXM      | 1p32.3    | 0.477647677  | 1.37E-11 | 6.84E-10 |
| KLHL32    | 6q16.1    | -0.477555291 | 1.39E-11 | 6.89E-10 |
| RCE1      | 11q13.2   | 0.477203775  | 1.44E-11 | 7.15E-10 |
| TRDMT1    | 10p13     | -0.477143096 | 1.45E-11 | 7.18E-10 |
| LPAR5     | 12p13.31  | 0.477099157  | 1.46E-11 | 7.19E-10 |
| ICE1      | 5p15.32   | -0.476640931 | 1.53E-11 | 7.55E-10 |
| PYCARD    | 16p11.2   | 0.476383571  | 1.58E-11 | 7.75E-10 |
| STX4      | 16p11.2   | 0.476333354  | 1.59E-11 | 7.76E-10 |
| CLDN23    | 8p23.1    | 0.476333354  | 1.59E-11 | 7.76E-10 |
| EPS8L2    | 11p15.5   | 0.476241291  | 1.60E-11 | 7.82E-10 |
| DHRS9     | 2q31.1    | 0.475904421  | 1.66E-11 | 8.10E-10 |
| ELL2      | 5q15      | -0.475879313 | 1.67E-11 | 8.10E-10 |
| NUAK2     | 1q32.1    | -0.475389701 | 1.76E-11 | 8.53E-10 |
| MLXIP     | 12q24.31  | -0.475333208 | 1.77E-11 | 8.56E-10 |
| ACTB      | 7p22.1    | 0.475316469  | 1.78E-11 | 8.56E-10 |
| MLEC      | 12q24.31  | -0.475161635 | 1.81E-11 | 8.68E-10 |
| FOXRED2   | 22q12.3   | -0.474992154 | 1.84E-11 | 8.83E-10 |
| MPHOSPH9  | 12q24.31  | -0.474791287 | 1.88E-11 | 9.00E-10 |
| RNF149    | 2q11.2    | 0.474764087  | 1.89E-11 | 9.01E-10 |
| GPR87     | 3q25.1    | 0.474526532  | 1.94E-11 | 9.23E-10 |
| AFAP1L2   | 10q25.3   | 0.474446049  | 1.96E-11 | 9.29E-10 |
| SH3D21    | 1p34.3    | 0.474148934  | 2.02E-11 | 9.57E-10 |
| LINC00479 | 21q22.3   | 0.473977196  | 2.06E-11 | 9.73E-10 |
| ZBTB7A    | 19p13.3   | 0.47383508   | 2.09E-11 | 9.86E-10 |
| GPR35     | 2q37.3    | 0.473797418  | 2.10E-11 | 9.88E-10 |
| ZNF488    | 10q11.22  | 0.47332873   | 2.21E-11 | 1.04E-09 |
| RFLNA     | 12q24.31  | 0.473247128  | 2.23E-11 | 1.05E-09 |
| MSLNL     | 16p13.3   | 0.473112969  | 2.27E-11 | 1.06E-09 |
| SLC25A51  | 9p13.2-p1 | -0.47288749  | 2.32E-11 | 1.08E-09 |
| DIS3L     | 15q22.31  | -0.472824472 | 2.34E-11 | 1.09E-09 |



|          |           |               |           |           |
|----------|-----------|---------------|-----------|-----------|
| MYD88    | 3p22. 2   | 0. 472730316  | 2. 36E-11 | 1. 10E-09 |
| ZNF407   | 18q22. 3  | -0. 472650807 | 2. 38E-11 | 1. 10E-09 |
| PM20D2   | 6q15      | -0. 472638252 | 2. 39E-11 | 1. 10E-09 |
| SLC39A4  | 8q24. 3   | 0. 472634068  | 2. 39E-11 | 1. 10E-09 |
| FUT2     | 19q13. 33 | 0. 472581759  | 2. 40E-11 | 1. 10E-09 |
| CHMP4B   | 20q11. 22 | 0. 472506434  | 2. 42E-11 | 1. 11E-09 |
| CGB8     | 19q13. 33 | 0. 47244819   | 2. 44E-11 | 1. 11E-09 |
| BICDL2   | 16p13. 3  | 0. 471983345  | 2. 56E-11 | 1. 17E-09 |
| CCDC117  | 22q12. 1  | -0. 471861988 | 2. 60E-11 | 1. 18E-09 |
| CTNNA1   | 5q31. 2   | 0. 471661122  | 2. 66E-11 | 1. 21E-09 |
| CHD6     | 20q12     | -0. 471627644 | 2. 67E-11 | 1. 21E-09 |
| MIS12    | 17p13. 2  | -0. 471627644 | 2. 67E-11 | 1. 21E-09 |
| MGLL     | 3q21. 3   | 0. 471460256  | 2. 72E-11 | 1. 22E-09 |
| CRIP1    | 14q32. 33 | 0. 471441424  | 2. 72E-11 | 1. 22E-09 |
| EML2     | 19q13. 32 | 0. 471430963  | 2. 72E-11 | 1. 22E-09 |
| TECTA    | 11q23. 3  | -0. 471244743 | 2. 78E-11 | 1. 25E-09 |
| FAM214B  | 9p13. 3   | 0. 471127571  | 2. 82E-11 | 1. 26E-09 |
| ING3     | 7q31. 31  | -0. 470853472 | 2. 90E-11 | 1. 29E-09 |
| CGB1     | 19q13. 33 | 0. 470797053  | 2. 92E-11 | 1. 30E-09 |
| PPP1CA   | 11q13. 2  | 0. 470725839  | 2. 94E-11 | 1. 31E-09 |
| PSORS1C1 | 6p21. 33  | 0. 470671683  | 2. 96E-11 | 1. 31E-09 |
| SLC52A3  | 20p13     | 0. 470598205  | 2. 98E-11 | 1. 32E-09 |
| ADORA2B  | 17p12     | 0. 470585651  | 2. 99E-11 | 1. 32E-09 |
| TUFT1    | 1q21. 3   | 0. 470098132  | 3. 15E-11 | 1. 39E-09 |
| FADD     | 11q13. 3  | 0. 470039546  | 3. 17E-11 | 1. 39E-09 |
| CACNB1   | 17q12     | 0. 469909819  | 3. 22E-11 | 1. 41E-09 |
| TMOD2    | 15q21. 2  | -0. 469893081 | 3. 22E-11 | 1. 41E-09 |
| MYO1B    | 2q32. 3   | -0. 469870065 | 3. 23E-11 | 1. 41E-09 |
| TMEM54   | 1p35. 1   | 0. 469754985  | 3. 27E-11 | 1. 42E-09 |
| ST14     | 11q24. 3  | 0. 469577135  | 3. 33E-11 | 1. 45E-09 |
| MAGEH1   | Xp11. 21  | -0. 469529011 | 3. 35E-11 | 1. 45E-09 |
| TNKS1BP1 | 11q12. 1  | 0. 469384638  | 3. 40E-11 | 1. 47E-09 |
| TAF9B    | Xq21. 1   | -0. 469187956 | 3. 48E-11 | 1. 50E-09 |
| PAIP2    | 5q31. 2   | -0. 469181679 | 3. 48E-11 | 1. 50E-09 |
| AASDH    | 4q12      | -0. 469110539 | 3. 51E-11 | 1. 51E-09 |
| MARK1    | 1q41      | -0. 46905823  | 3. 53E-11 | 1. 51E-09 |
| PCYT2    | 17q25. 3  | 0. 468947335  | 3. 57E-11 | 1. 53E-09 |
| FXR2     | 17p13. 1  | -0. 468928504 | 3. 58E-11 | 1. 53E-09 |
| RABEP1   | 17p13. 2  | -0. 468482832 | 3. 75E-11 | 1. 60E-09 |
| SMAD3    | 15q22. 33 | 0. 468390769  | 3. 79E-11 | 1. 61E-09 |
| FBXL19   | 16p11. 2  | 0. 468235934  | 3. 86E-11 | 1. 63E-09 |
| RFXAP    | 13q13. 3  | -0. 468233842 | 3. 86E-11 | 1. 63E-09 |
| ABHD17C  | 15q25. 1  | 0. 46822338   | 3. 86E-11 | 1. 63E-09 |
| TNNT2    | 1q32. 1   | 0. 468165954  | 3. 89E-11 | 1. 64E-09 |
| FAM184A  | 6q22. 31  | -0. 467995313 | 3. 96E-11 | 1. 66E-09 |
| RNF7     | 3q23      | 0. 467993221  | 3. 96E-11 | 1. 66E-09 |
| LFNG     | 7p22. 3   | 0. 467940912  | 3. 98E-11 | 1. 67E-09 |
| GLCCI1   | 7p21. 3   | -0. 46763752  | 4. 11E-11 | 1. 72E-09 |
| MVB12B   | 9q33. 3   | -0. 467633335 | 4. 12E-11 | 1. 72E-09 |
| TBC1D9   | 4q31. 21  | -0. 467595673 | 4. 13E-11 | 1. 72E-09 |
| MID2     | Xq22. 3   | -0. 467491055 | 4. 18E-11 | 1. 74E-09 |
| ANKRD46  | 8q22. 3   | -0. 466955412 | 4. 43E-11 | 1. 83E-09 |
| SPRR1A   | 1q21. 3   | 0. 466943437  | 4. 43E-11 | 1. 83E-09 |
| MPZL2    | 11q23. 3  | 0. 466903103  | 4. 45E-11 | 1. 84E-09 |

|          |          |              |          |          |
|----------|----------|--------------|----------|----------|
| TGFA     | 2p13.3   | 0.466867533  | 4.47E-11 | 1.84E-09 |
| C6ORF132 | 6p21.1   | 0.466836148  | 4.49E-11 | 1.84E-09 |
| TRAK1    | 3p22.1   | 0.466823593  | 4.49E-11 | 1.84E-09 |
| CDK18    | 1q32.1   | 0.466821501  | 4.49E-11 | 1.84E-09 |
| RNPEPL1  | 2q37.3   | 0.466781746  | 4.51E-11 | 1.84E-09 |
| RASSF7   | 11p15.5  | 0.466503463  | 4.65E-11 | 1.90E-09 |
| BATF     | 14q24.3  | 0.46647417   | 4.66E-11 | 1.90E-09 |
| TMSB10   | 2p11.2   | 0.466348628  | 4.73E-11 | 1.92E-09 |
| STN1     | 10q24.33 | 0.466214718  | 4.80E-11 | 1.94E-09 |
| TENT5C   | 1p12     | -0.466204256 | 4.80E-11 | 1.94E-09 |
| MVB12A   | 19p13.11 | 0.46603059   | 4.89E-11 | 1.98E-09 |
| CDC40    | 6q21     | -0.465693721 | 5.07E-11 | 2.04E-09 |
| ME2      | 18q21.2  | -0.465622581 | 5.11E-11 | 2.05E-09 |
| B4GALT4  | 3q13.32  | 0.465612119  | 5.12E-11 | 2.05E-09 |
| BIRC7    | 20q13.33 | 0.465566773  | 5.14E-11 | 2.06E-09 |
| FBXO10   | 9p13.2   | -0.465446823 | 5.21E-11 | 2.08E-09 |
| CDIP1    | 16p13.3  | -0.465340113 | 5.27E-11 | 2.10E-09 |
| TOP3A    | 17p11.2  | -0.465304543 | 5.29E-11 | 2.11E-09 |
| EML1     | 14q32.2  | -0.464894441 | 5.53E-11 | 2.19E-09 |
| ELOVL1   | 1p34.2   | 0.464869332  | 5.54E-11 | 2.19E-09 |
| KRTCAP3  | 2p23.3   | 0.464869332  | 5.54E-11 | 2.19E-09 |
| TSTD2    | 9q22.33  | -0.464794007 | 5.58E-11 | 2.21E-09 |
| BHLHB9   | Xq22.1   | -0.464658004 | 5.67E-11 | 2.23E-09 |
| CIB1     | 15q26.1  | 0.464237441  | 5.93E-11 | 2.33E-09 |
| FBXO33   | 14q21.1  | -0.464206055 | 5.95E-11 | 2.33E-09 |
| ARHGEF26 | 3q25.2   | -0.464201871 | 5.95E-11 | 2.33E-09 |
| CST4     | 20p11.21 | 0.464180237  | 5.96E-11 | 2.33E-09 |
| LANCL3   | Xp21.1   | 0.464133066  | 5.99E-11 | 2.34E-09 |
| NET1     | 10p15.1  | 0.463793861  | 6.21E-11 | 2.42E-09 |
| ATRN     | 20p13    | -0.463674597 | 6.29E-11 | 2.45E-09 |
| FAM25A   | 10q23.2  | 0.463566584  | 6.37E-11 | 2.47E-09 |
| KCTD12   | 13q22.3  | -0.463270772 | 6.57E-11 | 2.55E-09 |
| LPAR2    | 19p13.11 | 0.463233352  | 6.60E-11 | 2.55E-09 |
| KCNJ2    | 17q24.3  | -0.463222648 | 6.60E-11 | 2.55E-09 |
| ZHX3     | 20q12    | -0.463164062 | 6.65E-11 | 2.56E-09 |
| ADGRF1   | 6p12.3 6 | 0.463068473  | 6.71E-11 | 2.58E-09 |
| B4GALT6  | 18q12.1  | -0.462992488 | 6.77E-11 | 2.60E-09 |
| CNIH4    | 1q42.11  | 0.462406629  | 7.20E-11 | 2.76E-09 |
| RASAL1   | 12q24.13 | 0.462132772  | 7.42E-11 | 2.83E-09 |
| LRFN4    | 11q13.2  | 0.462059297  | 7.47E-11 | 2.85E-09 |
| PRKAR2B  | 7q22.3   | -0.461956772 | 7.56E-11 | 2.88E-09 |
| ZRANB1   | 10q26.13 | -0.461634549 | 7.82E-11 | 2.97E-09 |
| CYP2U1   | 4q25     | -0.461588517 | 7.86E-11 | 2.98E-09 |
| KIF13B   | 8p12     | 0.461354173  | 8.05E-11 | 3.05E-09 |
| SNX30    | 9q32     | -0.461159584 | 8.22E-11 | 3.11E-09 |
| SMAGP    | 12q13.13 | 0.46110309   | 8.27E-11 | 3.12E-09 |
| USP51    | Xp11.21  | -0.461094721 | 8.28E-11 | 3.12E-09 |
| CERK     | 22q13.31 | -0.461042412 | 8.32E-11 | 3.13E-09 |
| PSKH1    | 16q22.1  | -0.460979641 | 8.38E-11 | 3.14E-09 |
| ACP6     | 1q21.2   | 0.460908501  | 8.44E-11 | 3.16E-09 |
| SPATS2L  | 2q33.1   | 0.460833176  | 8.51E-11 | 3.18E-09 |
| GUK1     | 1q42.13  | 0.460682527  | 8.65E-11 | 3.22E-09 |
| SNCA     | 4q22.1   | -0.460443998 | 8.87E-11 | 3.30E-09 |
| SEC63    | 6q21     | -0.46041052  | 8.90E-11 | 3.31E-09 |

|           |           |              |          |          |
|-----------|-----------|--------------|----------|----------|
| AATF      | 17q12     | 0.460220116  | 9.08E-11 | 3.37E-09 |
| UGT1A6    | 2q37.1    | 0.459930638  | 9.36E-11 | 3.46E-09 |
| MAL2      | 8q24.12   | 0.459849769  | 9.44E-11 | 3.49E-09 |
| ZBTB10    | 8q21.13   | -0.459671918 | 9.62E-11 | 3.55E-09 |
| CYP2S1    | 19q13.2   | 0.45965518   | 9.63E-11 | 3.55E-09 |
| INKA2     | 1p13.2    | -0.459481995 | 9.81E-11 | 3.60E-09 |
| DNAJB9    | 7q31.1 14 | -0.459471052 | 9.82E-11 | 3.60E-09 |
| STXBP5    | 6q24.3    | -0.4592116   | 1.01E-10 | 3.70E-09 |
| BACE1     | 11q23.3   | -0.459017011 | 1.03E-10 | 3.76E-09 |
| ZDHHC7    | 16q24.1   | 0.45874082   | 1.06E-10 | 3.87E-09 |
| TTC7B     | 14q32.11  | -0.458521122 | 1.09E-10 | 3.95E-09 |
| CACNB3    | 12q13.12  | 0.457964555  | 1.15E-10 | 4.18E-09 |
| UBE2J1    | 6q15      | -0.4578976   | 1.16E-10 | 4.20E-09 |
| BTBD10    | 11p15.3   | 0.457836922  | 1.17E-10 | 4.22E-09 |
| HIRA      | 22q11.21  | -0.45731174  | 1.23E-10 | 4.45E-09 |
| FKBP1B    | 2p23.3    | 0.457274078  | 1.24E-10 | 4.46E-09 |
| CHMP1A    | 16q24.3   | 0.457251062  | 1.24E-10 | 4.46E-09 |
| MBP       | 18q23     | -0.457081581 | 1.26E-10 | 4.54E-09 |
| GNG2      | 14q22.1   | -0.456960224 | 1.28E-10 | 4.58E-09 |
| IL1R2     | 2q11.2    | 0.456822129  | 1.30E-10 | 4.64E-09 |
| CNNM4     | 2q11.2    | 0.456692403  | 1.31E-10 | 4.70E-09 |
| EPHA1     | 7q34-q35  | 0.45664661   | 1.32E-10 | 4.71E-09 |
| S100A14   | 1q21.3    | 0.456502237  | 1.34E-10 | 4.77E-09 |
| GRB7      | 17q12     | 0.456493629  | 1.34E-10 | 4.77E-09 |
| ADAM8     | 10q26.3   | 0.456439228  | 1.35E-10 | 4.79E-09 |
| SMYD4     | 17p13.3   | -0.456257192 | 1.37E-10 | 4.86E-09 |
| INAVA     | 1q32.1    | 0.4562551    | 1.38E-10 | 4.86E-09 |
| SOX5      | 12p12.1   | -0.456169313 | 1.39E-10 | 4.90E-09 |
| EREG      | 4q13.3    | 0.455740672  | 1.45E-10 | 5.11E-09 |
| CNKSR1    | 1p36.11   | 0.455547884  | 1.48E-10 | 5.21E-09 |
| CGN       | 1q21.3    | 0.455395142  | 1.50E-10 | 5.28E-09 |
| GPLD1     | 6p22.3    | -0.455311447 | 1.52E-10 | 5.32E-09 |
| CEP97     | 3q12.3    | -0.454953654 | 1.57E-10 | 5.51E-09 |
| SAMD10    | 20q13.33  | 0.454807189  | 1.60E-10 | 5.58E-09 |
| CREB3L2   | 7q33      | -0.454796728 | 1.60E-10 | 5.58E-09 |
| TMC6      | 17q25.3   | 0.454779989  | 1.60E-10 | 5.58E-09 |
| ELF3      | 1q32.1    | 0.454662817  | 1.62E-10 | 5.64E-09 |
| SESN1     | 6q21      | -0.454551922 | 1.64E-10 | 5.69E-09 |
| RAPGEF1   | 9q34.13   | -0.454407549 | 1.67E-10 | 5.77E-09 |
| SLC26A2   | 5q32      | -0.454367794 | 1.67E-10 | 5.78E-09 |
| BTBD3     | 20p12.2   | -0.454318862 | 1.68E-10 | 5.80E-09 |
| CCDC110   | 4q35.1    | -0.454215052 | 1.70E-10 | 5.86E-09 |
| MAN2A2    | 15q26.1   | -0.453968154 | 1.74E-10 | 6.00E-09 |
| GSTA4     | 6p12.2    | -0.453834244 | 1.77E-10 | 6.07E-09 |
| TNFRSF21  | 6p12.3    | 0.453771473  | 1.78E-10 | 6.10E-09 |
| SDC4      | 20q13.12  | 0.45344088   | 1.84E-10 | 6.30E-09 |
| ZFP3      | 17p13.2   | -0.453311154 | 1.87E-10 | 6.37E-09 |
| TSPAN15   | 10q22.1   | 0.453181428  | 1.89E-10 | 6.45E-09 |
| SMAD5     | 5q31.1    | -0.453164689 | 1.89E-10 | 6.45E-09 |
| RALGAPA1  | 14q13.2   | -0.452905237 | 1.95E-10 | 6.61E-09 |
| ST6GALNAC | 17q25.1   | 0.452532798  | 2.02E-10 | 6.86E-09 |
| TNFRSF10E | 8p21.3    | 0.452233591  | 2.08E-10 | 7.06E-09 |
| ADNP2     | 18q23     | -0.452193836 | 2.09E-10 | 7.08E-09 |
| ZIK1      | 19q13.43  | -0.451840228 | 2.17E-10 | 7.33E-09 |

|           |            |              |          |          |
|-----------|------------|--------------|----------|----------|
| FAM171B   | 2q32.1     | -0.451013747 | 2.36E-10 | 7.96E-09 |
| CMTM7     | 3p22.3     | 0.450994916  | 2.37E-10 | 7.96E-09 |
| TTLL12    | 22q13.2    | 0.450984454  | 2.37E-10 | 7.96E-09 |
| FECH      | 18q21.31   | -0.450904944 | 2.39E-10 | 8.01E-09 |
| ZDHC15    | Xq13.3     | -0.450712447 | 2.44E-10 | 8.15E-09 |
| TBL1X     | Xp22.31-1  | -0.450210282 | 2.56E-10 | 8.57E-09 |
| CORO2A    | 9q22.33    | 0.450149603  | 2.58E-10 | 8.61E-09 |
| DNAJC18   | 5q31.2     | -0.449990584 | 2.62E-10 | 8.73E-09 |
| ZNF286A   | 17p12      | -0.449877597 | 2.65E-10 | 8.82E-09 |
| ANKFY1    | 17p13.2    | -0.449517712 | 2.75E-10 | 9.13E-09 |
| ARHGAP27F | 17q24.1    | 0.449375432  | 2.79E-10 | 9.25E-09 |
| NDST1     | 5q33.1     | -0.449228967 | 2.83E-10 | 9.38E-09 |
| PDLIM7    | 5q35.3     | 0.449118072  | 2.87E-10 | 9.47E-09 |
| FBXL12    | 19p13.2    | 0.448950918  | 2.91E-10 | 9.61E-09 |
| PROM2     | 2q11.1     | 0.448887912  | 2.93E-10 | 9.66E-09 |
| FSD1L     | 9q31.2     | -0.448866989 | 2.94E-10 | 9.66E-09 |
| KRT14     | 17q21.2    | 0.448790873  | 2.96E-10 | 9.72E-09 |
| CAPN2     | 1q41       | 0.448649384  | 3.01E-10 | 9.83E-09 |
| ZNF79     | 9q33.3     | -0.448649384 | 3.01E-10 | 9.83E-09 |
| ZNF566    | 19q13.12   | -0.448607537 | 3.02E-10 | 9.86E-09 |
| BLMH      | 17q11.2    | -0.448304145 | 3.11E-10 | 1.01E-08 |
| BEST4     | 1p34.1     | 0.448220451  | 3.14E-10 | 1.02E-08 |
| SASH1     | 6q24.3-q25 | -0.448201619 | 3.15E-10 | 1.02E-08 |
| WNK3      | Xp11.22    | -0.448110493 | 3.17E-10 | 1.03E-08 |
| ZNF542P   | 19q13.43   | -0.448048877 | 3.19E-10 | 1.03E-08 |
| RNF207    | 1p36.31    | 0.447814534  | 3.27E-10 | 1.06E-08 |
| NRADDP    | 3p21.31    | 0.447783398  | 3.28E-10 | 1.06E-08 |
| PARP12    | 7q34       | 0.447718285  | 3.30E-10 | 1.06E-08 |
| AGTPBP1   | 9q21.33    | -0.447693177 | 3.31E-10 | 1.07E-08 |
| PPP4C     | 16p11.2    | 0.447634591  | 3.33E-10 | 1.07E-08 |
| PLIN3     | 19p13.3    | 0.44753625   | 3.36E-10 | 1.08E-08 |
| CD99L2    | Xq28       | -0.447404432 | 3.41E-10 | 1.09E-08 |
| CD151     | 11p15.5    | 0.447069655  | 3.53E-10 | 1.13E-08 |
| KLK9      | 19q13.41   | 0.447055272  | 3.53E-10 | 1.13E-08 |
| ZNF658    | 9q21.11    | -0.446921097 | 3.58E-10 | 1.14E-08 |
| FBX09     | 6p12.1     | -0.446908543 | 3.58E-10 | 1.14E-08 |
| HK2       | 2p12       | 0.446762078  | 3.64E-10 | 1.16E-08 |
| ALKBH5    | 17p11.2 1  | -0.446732785 | 3.65E-10 | 1.16E-08 |
| CEACAM6   | 19q13.2    | 0.446611662  | 3.69E-10 | 1.17E-08 |
| EPB41L3   | 18p11.31   | -0.446525642 | 3.73E-10 | 1.18E-08 |
| GRTP1     | 13q34      | 0.446427301  | 3.76E-10 | 1.19E-08 |
| MICALL2   | 7p22.3     | 0.446414747  | 3.77E-10 | 1.19E-08 |
| GGA2      | 16p12.2    | -0.446398008 | 3.77E-10 | 1.19E-08 |
| PHACTR1   | 6p24.1     | -0.446360346 | 3.79E-10 | 1.19E-08 |
| SFXN3     | 10q24.31   | 0.446339422  | 3.80E-10 | 1.19E-08 |
| COPS3     | 17p11.2    | -0.446182495 | 3.86E-10 | 1.21E-08 |
| ERN2      | 16p12.2    | 0.446111838  | 3.88E-10 | 1.22E-08 |
| C6ORF89   | 6p21.2     | -0.446073693 | 3.90E-10 | 1.22E-08 |
| SLC35F2   | 11q22.3    | 0.445895842  | 3.97E-10 | 1.24E-08 |
| WFDC2     | 20q13.12   | 0.445782855  | 4.02E-10 | 1.25E-08 |
| SH3BGRL3  | 1p36.11    | 0.445770301  | 4.02E-10 | 1.25E-08 |
| PRMT9     | 4q31.23    | -0.445753562 | 4.03E-10 | 1.25E-08 |
| MAP3K4    | 6q26       | -0.445722177 | 4.04E-10 | 1.25E-08 |
| GPAM      | 10q25.2    | -0.445550604 | 4.11E-10 | 1.27E-08 |

|           |           |              |          |          |
|-----------|-----------|--------------|----------|----------|
| GDPD3     | 16p11.2   | 0.445243027  | 4.24E-10 | 1.31E-08 |
| DDA1      | 19p13.11  | 0.445077731  | 4.31E-10 | 1.33E-08 |
| MED13L    | 12q24.21  | -0.444958467 | 4.36E-10 | 1.34E-08 |
| EHD2      | 19q13.33  | 0.444941728  | 4.37E-10 | 1.34E-08 |
| TNS4      | 17q21.2   | 0.444811119  | 4.43E-10 | 1.36E-08 |
| PDE3B     | 11p15.2   | -0.444537903 | 4.55E-10 | 1.39E-08 |
| MAPRE2    | 18q12.1-c | -0.444406085 | 4.61E-10 | 1.41E-08 |
| ANKFN1    | 17q22     | 0.444381902  | 4.62E-10 | 1.41E-08 |
| C17ORF50  | 17q12     | 0.444372958  | 4.63E-10 | 1.41E-08 |
| ZNF271P   | 18q12.2   | -0.444186387 | 4.71E-10 | 1.44E-08 |
| CCDC9B    | 15q15.1   | 0.444100601  | 4.75E-10 | 1.45E-08 |
| DNAJC27   | 2p23.3    | -0.443824409 | 4.89E-10 | 1.48E-08 |
| HSH2D     | 19p13.11  | 0.443721884  | 4.94E-10 | 1.50E-08 |
| ATP2B1    | 12q21.33  | -0.443686314 | 4.95E-10 | 1.50E-08 |
| DSTYK     | 1q32.1    | -0.443613081 | 4.99E-10 | 1.51E-08 |
| XBP1      | 22q12.1 2 | -0.443552403 | 5.02E-10 | 1.52E-08 |
| BRI3      | 7q21.3    | 0.443048145  | 5.28E-10 | 1.59E-08 |
| TMEM40    | 3p25.2    | 0.442465252  | 5.60E-10 | 1.68E-08 |
| LGALS9    | 17q11.2   | 0.44228025   | 5.70E-10 | 1.71E-08 |
| PPM1D     | 17q23.2   | -0.442142155 | 5.78E-10 | 1.73E-08 |
| ZFAND4    | 10q11.22  | -0.4421024   | 5.80E-10 | 1.74E-08 |
| TNNI2     | 11p15.5   | 0.442099482  | 5.80E-10 | 1.74E-08 |
| STYK1     | 12p13.2   | 0.442071246  | 5.82E-10 | 1.74E-08 |
| CNST      | 1q44      | -0.442035445 | 5.84E-10 | 1.74E-08 |
| SULT1C2   | 2q12.3    | 0.441909088  | 5.91E-10 | 1.76E-08 |
| HMGA1     | 6p21.31   | 0.441748792  | 6.01E-10 | 1.79E-08 |
| POU6F2    | 7p14.1    | -0.441417102 | 6.21E-10 | 1.84E-08 |
| RAB11FIP3 | 16p13.3   | -0.441104346 | 6.41E-10 | 1.90E-08 |
| CITED2    | 6q24.1    | -0.440993451 | 6.48E-10 | 1.92E-08 |
| TBC1D15   | 12q21.1   | -0.440976712 | 6.49E-10 | 1.92E-08 |
| THAP5     | 7q31.1    | -0.440702613 | 6.67E-10 | 1.97E-08 |
| RSBN1     | 1p13.2    | -0.440472454 | 6.82E-10 | 2.01E-08 |
| ATP8B2    | 1q21.3    | -0.439949365 | 7.18E-10 | 2.11E-08 |
| CGB2      | 19q13.33  | 0.439882259  | 7.23E-10 | 2.12E-08 |
| SMIM13    | 6p24.2    | -0.439824054 | 7.27E-10 | 2.13E-08 |
| ARHGAP8   | 22q13.31  | 0.439779884  | 7.30E-10 | 2.14E-08 |
| ABLIM3    | 5q32      | 0.439756868  | 7.32E-10 | 2.14E-08 |
| EXOC3L4   | 14q32.32  | 0.439689913  | 7.37E-10 | 2.15E-08 |
| ZBTB24    | 6q21      | -0.439664804 | 7.39E-10 | 2.15E-08 |
| EIF6      | 20q11.22  | 0.439656435  | 7.39E-10 | 2.15E-08 |
| SLC45A3   | 1q32.1    | 0.439160547  | 7.76E-10 | 2.26E-08 |
| ARHGEF5   | 7q35      | 0.43907476   | 7.83E-10 | 2.27E-08 |
| ALDOA     | 16p11.2   | 0.4388174    | 8.03E-10 | 2.33E-08 |
| CNKSR3    | 6q25.2    | -0.438811123 | 8.03E-10 | 2.33E-08 |
| NPSR1     | 7p14.3    | 0.438756873  | 8.08E-10 | 2.34E-08 |
| UBE2G1    | 17p13.2   | -0.438691859 | 8.13E-10 | 2.35E-08 |
| ANXA10    | 4q32.3    | 0.438583056  | 8.22E-10 | 2.37E-08 |
| BEND3     | 6q21      | -0.438354989 | 8.40E-10 | 2.42E-08 |
| CTDSP1    | 2q35      | 0.438225263  | 8.51E-10 | 2.45E-08 |
| ST6GALNAC | 9q34.11   | -0.438191785 | 8.54E-10 | 2.45E-08 |
| DDX19B    | 16q22.1   | 0.438152031  | 8.57E-10 | 2.46E-08 |
| ACSL5     | 10q25.2   | 0.438076706  | 8.63E-10 | 2.47E-08 |
| POLB      | 8p11.21   | 0.43804532   | 8.66E-10 | 2.48E-08 |
| INVS      | 9q31.1    | -0.437969996 | 8.73E-10 | 2.49E-08 |

|           |           |              |          |          |
|-----------|-----------|--------------|----------|----------|
| LBX2      | 2p13.1    | 0.437915594  | 8.77E-10 | 2.50E-08 |
| ZNF22     | 10q11.21  | -0.437804699 | 8.87E-10 | 2.52E-08 |
| A2ML1     | 12p13.31  | 0.437442984  | 9.19E-10 | 2.61E-08 |
| PLCB1     | 20p12.3   | -0.437306719 | 9.31E-10 | 2.64E-08 |
| MFSD10    | 4p16.3    | 0.437296257  | 9.32E-10 | 2.64E-08 |
| KIAA1586  | 6p12.1    | -0.437262779 | 9.35E-10 | 2.65E-08 |
| DNAJC6    | 1p31.3    | -0.437179085 | 9.43E-10 | 2.67E-08 |
| GID4      | 17p11.2 1 | -0.437145607 | 9.46E-10 | 2.67E-08 |
| PTPRS     | 19p13.3   | -0.437128868 | 9.47E-10 | 2.67E-08 |
| TCP11L2   | 12q23.3   | -0.437055636 | 9.54E-10 | 2.69E-08 |
| POLR2H    | 3q27.1    | 0.436994957  | 9.60E-10 | 2.70E-08 |
| CORO1B    | 11q13.2   | 0.436942649  | 9.65E-10 | 2.71E-08 |
| LDHA      | 11p15.1   | 0.436930094  | 9.66E-10 | 2.71E-08 |
| TMUB2     | 17q21.31  | 0.436852677  | 9.73E-10 | 2.72E-08 |
| CYB5D1    | 17p13.1   | -0.436725043 | 9.86E-10 | 2.76E-08 |
| LYRM2     | 6q15      | -0.436484422 | 1.01E-09 | 2.82E-08 |
| SLC10A3   | Xq28      | 0.436463499  | 1.01E-09 | 2.82E-08 |
| ANKRD10   | 13q34     | 0.436459314  | 1.01E-09 | 2.82E-08 |
| RDH13     | 19q13.42  | 0.436371435  | 1.02E-09 | 2.84E-08 |
| ISCA1     | 9q21.33   | -0.43633168  | 1.02E-09 | 2.84E-08 |
| GPX1      | 3p21.31   | 0.436283556  | 1.03E-09 | 2.85E-08 |
| CDSN      | 6p21.33   | 0.436236345  | 1.03E-09 | 2.86E-08 |
| SIK2      | 11q23.1   | -0.436158015 | 1.04E-09 | 2.88E-08 |
| CLCF1     | 11q13.2   | 0.436149645  | 1.04E-09 | 2.88E-08 |
| EFNA3     | 1q21.3    | 0.436139184  | 1.04E-09 | 2.88E-08 |
| SRBD1     | 2p21      | -0.436099429 | 1.05E-09 | 2.88E-08 |
| RGL1      | 1q25.3    | -0.435934133 | 1.06E-09 | 2.93E-08 |
| CERS4     | 19p13.2   | -0.435900655 | 1.07E-09 | 2.93E-08 |
| SLC35E2B  | 1p36.33   | -0.435839977 | 1.07E-09 | 2.94E-08 |
| NXPE3     | 3q12.3    | -0.435829515 | 1.08E-09 | 2.94E-08 |
| KLHL30    | 2q37.3    | 0.435660034  | 1.09E-09 | 2.99E-08 |
| MTRR      | 5p15.31   | -0.435423598 | 1.12E-09 | 3.06E-08 |
| ELAC1     | 18q21.2   | -0.435392212 | 1.12E-09 | 3.06E-08 |
| ACTN4     | 19q13.2   | 0.435323164  | 1.13E-09 | 3.08E-08 |
| OTUD7A    | 15q13.3   | -0.435295964 | 1.13E-09 | 3.08E-08 |
| TAGLN2    | 1q23.2    | 0.435281317  | 1.13E-09 | 3.08E-08 |
| DTX2      | 7q11.23   | 0.435054524  | 1.16E-09 | 3.15E-08 |
| RIPK4     | 21q22.3   | 0.434850292  | 1.18E-09 | 3.20E-08 |
| NR1I2     | 3q13.33   | 0.434779152  | 1.19E-09 | 3.22E-08 |
| DMXL2     | 15q21.2   | -0.434469483 | 1.23E-09 | 3.32E-08 |
| MFSD2B    | 2p23.3    | 0.434452744  | 1.23E-09 | 3.32E-08 |
| C10RF109  | 1p34.3    | -0.434291633 | 1.25E-09 | 3.36E-08 |
| PTGES     | 9q34.11   | 0.434239324  | 1.26E-09 | 3.38E-08 |
| CST6      | 11q13.1   | 0.434026812  | 1.28E-09 | 3.44E-08 |
| FAM32A    | 19p13.11  | 0.43392547   | 1.29E-09 | 3.47E-08 |
| SIDT2     | 11q23.3   | -0.433923378 | 1.29E-09 | 3.47E-08 |
| SLURP1    | 8q24.3    | 0.43389644   | 1.30E-09 | 3.47E-08 |
| TECPR2    | 14q32.31  | -0.433762266 | 1.31E-09 | 3.51E-08 |
| AP1M2     | 19p13.2   | 0.433722512  | 1.32E-09 | 3.52E-08 |
| CLCN5     | Xp11.23   | -0.43371205  | 1.32E-09 | 3.52E-08 |
| SNX25     | 4q35.1    | -0.433707865 | 1.32E-09 | 3.52E-08 |
| C5        | 9q33.2    | -0.433122005 | 1.40E-09 | 3.72E-08 |
| GJB5      | 1p34.3    | 0.433051771  | 1.41E-09 | 3.74E-08 |
| SLC22A20F | 11q13.1   | 0.432933693  | 1.42E-09 | 3.78E-08 |

|          |          |              |          |          |
|----------|----------|--------------|----------|----------|
| TMEM134  | 11q13.2  | 0.432910677  | 1.43E-09 | 3.78E-08 |
| TFAP2A   | 6p24.3   | 0.432806059  | 1.44E-09 | 3.81E-08 |
| MTMR11   | 1q21.2   | 0.432730735  | 1.45E-09 | 3.83E-08 |
| BHLHE40  | 3p26.1   | 0.432659595  | 1.46E-09 | 3.86E-08 |
| PSIP1    | 9p22.3   | -0.432531961 | 1.48E-09 | 3.90E-08 |
| ZFYVE9   | 1p32.3   | -0.432329002 | 1.51E-09 | 3.97E-08 |
| SLC39A6  | 18q12.2  | -0.432285063 | 1.52E-09 | 3.98E-08 |
| PLEKHM1  | 17q21.31 | 0.432190907  | 1.53E-09 | 4.01E-08 |
| MEGF9    | 9q33.2   | -0.432130228 | 1.54E-09 | 4.03E-08 |
| PBX3     | 9q33.3   | -0.432054903 | 1.55E-09 | 4.05E-08 |
| SEC11C   | 18q21.32 | -0.432040257 | 1.55E-09 | 4.05E-08 |
| EFNB2    | 13q33.3  | 0.43203398   | 1.55E-09 | 4.05E-08 |
| SOCS2    | 12q22    | -0.431964932 | 1.56E-09 | 4.07E-08 |
| ZNF275   | Xq28     | -0.431845668 | 1.58E-09 | 4.11E-08 |
| LNP1     | 3q12.2   | -0.431839391 | 1.58E-09 | 4.11E-08 |
| DHRS3    | 1p36.21  | 0.431770343  | 1.59E-09 | 4.14E-08 |
| C8ORF31  | 8q24.3   | 0.431695018  | 1.60E-09 | 4.16E-08 |
| N4BP2    | 4p14     | -0.431586216 | 1.62E-09 | 4.20E-08 |
| KCNMA1   | 10q22.3  | -0.431330948 | 1.66E-09 | 4.30E-08 |
| TMX3     | 18q22.1  | -0.431253531 | 1.67E-09 | 4.32E-08 |
| APH1A    | 1q21.2   | 0.431153098  | 1.69E-09 | 4.36E-08 |
| KRT6A    | 12q13.13 | 0.431141703  | 1.69E-09 | 4.36E-08 |
| SMCO2    | 12p11.23 | 0.431116337  | 1.70E-09 | 4.36E-08 |
| ACSL6    | 5q31.1   | -0.431075681 | 1.70E-09 | 4.37E-08 |
| CEP120   | 5q23.2   | -0.430902015 | 1.73E-09 | 4.44E-08 |
| HECTD2   | 10q23.32 | -0.430832967 | 1.74E-09 | 4.47E-08 |
| SYNGR2   | 17q25.3  | 0.430592346  | 1.78E-09 | 4.56E-08 |
| WDR37    | 10p15.3  | -0.430546314 | 1.79E-09 | 4.58E-08 |
| DOCK6    | 19p13.2  | 0.430529575  | 1.79E-09 | 4.58E-08 |
| SMARCA2  | 9p24.3   | -0.430397757 | 1.82E-09 | 4.63E-08 |
| PLPP2    | 19p13.3  | 0.430173875  | 1.86E-09 | 4.73E-08 |
| SPINT1   | 15q15.1  | 0.429996025  | 1.89E-09 | 4.80E-08 |
| TSPYL1   | 6q22.1   | -0.429895591 | 1.91E-09 | 4.84E-08 |
| ADGRE5   | 19p13.12 | 0.429880945  | 1.91E-09 | 4.84E-08 |
| TIMM21   | 18q22.3  | -0.429878853 | 1.91E-09 | 4.84E-08 |
| MYRIP    | 3p22.1   | -0.429613123 | 1.96E-09 | 4.96E-08 |
| PCNX1    | 14q24.2  | -0.429590107 | 1.96E-09 | 4.96E-08 |
| LANCL2   | 7p11.2   | -0.429564178 | 1.97E-09 | 4.97E-08 |
| KLHL13   | Xq24     | -0.429424811 | 1.99E-09 | 5.03E-08 |
| GALNT5   | 2q24.1   | 0.429358009  | 2.01E-09 | 5.05E-08 |
| C6ORF120 | 6q27     | -0.429238591 | 2.03E-09 | 5.10E-08 |
| CREBL2   | 12p13.1  | -0.429221853 | 2.03E-09 | 5.11E-08 |
| IHH      | 2q35     | 0.429094219  | 2.06E-09 | 5.16E-08 |
| RIPK3    | 14q12    | 0.429039818  | 2.07E-09 | 5.18E-08 |
| ZNF253   | 19p13.11 | -0.429037725 | 2.07E-09 | 5.18E-08 |
| ZMYND11  | 10p15.3  | -0.428958216 | 2.08E-09 | 5.21E-08 |
| FEM1B    | 15q23    | -0.428853598 | 2.11E-09 | 5.25E-08 |
| PRELID2  | 5q32     | 0.428847321  | 2.11E-09 | 5.25E-08 |
| HACE1    | 6q16.3   | -0.428836859 | 2.11E-09 | 5.25E-08 |
| TNFRSF14 | 1p36.32  | 0.428786642  | 2.12E-09 | 5.27E-08 |
| CRABP2   | 1q23.1   | 0.42870504   | 2.14E-09 | 5.30E-08 |
| RALB     | 2q14.2   | 0.428698763  | 2.14E-09 | 5.30E-08 |
| BTBD16   | 10q26.13 | 0.428583684  | 2.16E-09 | 5.35E-08 |
| CXXC4    | 4q24     | -0.428343056 | 2.21E-09 | 5.47E-08 |

|           |          |              |          |          |
|-----------|----------|--------------|----------|----------|
| ZNF287    | 17p11.2  | -0.428173582 | 2.25E-09 | 5.55E-08 |
| GPRC5D    | 12p13.1  | 0.428133827  | 2.26E-09 | 5.56E-08 |
| HECW2     | 2q32.3   | -0.428106626 | 2.26E-09 | 5.56E-08 |
| DHRS1     | 14q12    | 0.428106626  | 2.26E-09 | 5.56E-08 |
| MROH8     | 20q11.23 | -0.428096165 | 2.26E-09 | 5.56E-08 |
| TTC41P    | 12q23.3  | -0.427965616 | 2.29E-09 | 5.62E-08 |
| SGMS1     | 10q11.23 | -0.427962254 | 2.29E-09 | 5.62E-08 |
| LINC00242 | 6q27     | -0.427955977 | 2.29E-09 | 5.62E-08 |
| FAM120B   | 6q27     | -0.427907853 | 2.30E-09 | 5.64E-08 |
| LGR6      | 1q32.1   | 0.427897391  | 2.31E-09 | 5.64E-08 |
| PLBD2     | 12q24.13 | -0.427874375 | 2.31E-09 | 5.64E-08 |
| ZSCAN2    | 15q25.2  | -0.427771849 | 2.33E-09 | 5.69E-08 |
| C12ORF29  | 12q21.32 | -0.427744649 | 2.34E-09 | 5.70E-08 |
| CREG2     | 2q11.2   | 0.427641301  | 2.36E-09 | 5.74E-08 |
| PTPRH     | 19q13.42 | 0.427640031  | 2.36E-09 | 5.74E-08 |
| AGRN      | 1p36.33  | 0.427581445  | 2.38E-09 | 5.76E-08 |
| SULT2B1   | 19q13.33 | 0.427566798  | 2.38E-09 | 5.76E-08 |
| THAP9     | 4q21.22  | -0.427566798 | 2.38E-09 | 5.76E-08 |
| POC1A     | 3p21.2   | 0.427313623  | 2.44E-09 | 5.89E-08 |
| RAB39A    | 11q22.3  | -0.427284721 | 2.44E-09 | 5.90E-08 |
| ASL       | 7q11.21  | 0.427144142  | 2.48E-09 | 5.97E-08 |
| CCDC120   | Xp11.23  | 0.426985123  | 2.51E-09 | 6.06E-08 |
| KIAA1324  | 1p13.3   | -0.426685916 | 2.59E-09 | 6.22E-08 |
| RPA1      | 17p13.3  | -0.426641977 | 2.60E-09 | 6.24E-08 |
| STAP2     | 19p13.3  | 0.426608499  | 2.61E-09 | 6.25E-08 |
| MTF1      | 1p34.3   | -0.426566652 | 2.62E-09 | 6.27E-08 |
| ZNF614    | 19q13.41 | -0.426516435 | 2.63E-09 | 6.29E-08 |
| TULP4     | 6q25.3   | -0.426311385 | 2.68E-09 | 6.41E-08 |
| ERCC4     | 16p13.12 | -0.426273722 | 2.69E-09 | 6.41E-08 |
| UBALD2    | 17q25.1  | 0.426267445  | 2.69E-09 | 6.41E-08 |
| PPP6C     | 9q33.3   | -0.42626326  | 2.69E-09 | 6.41E-08 |
| PHF10     | 6q27     | -0.426223506 | 2.70E-09 | 6.43E-08 |
| CCDC126   | 7p15.3   | -0.426116795 | 2.73E-09 | 6.49E-08 |
| RNF138    | 18q12.1  | -0.425999623 | 2.76E-09 | 6.55E-08 |
| DDIT4     | 10q22.1  | 0.42593476   | 2.78E-09 | 6.58E-08 |
| CYMP      | 1p13.3   | 0.425907085  | 2.78E-09 | 6.59E-08 |
| FAM169A   | 5q13.3   | -0.425798757 | 2.81E-09 | 6.65E-08 |
| BMP4      | 14q22.2  | 0.425683678  | 2.84E-09 | 6.72E-08 |
| TBCEL     | 11q23.3  | -0.425501642 | 2.89E-09 | 6.83E-08 |
| CYP2C9    | 10q23.33 | 0.425125908  | 3.00E-09 | 7.06E-08 |
| LAMB4     | 7q31.1   | -0.425113359 | 3.00E-09 | 7.06E-08 |
| PDZD3     | 11q23.3  | 0.425112596  | 3.00E-09 | 7.06E-08 |
| UHRF1BP1I | 12q23.1  | -0.425093633 | 3.01E-09 | 7.06E-08 |
| CA14      | 1q21.2   | 0.424965999  | 3.04E-09 | 7.14E-08 |
| FGFR1     | 8p11.23  | -0.424911598 | 3.06E-09 | 7.16E-08 |
| ABCC9     | 12p12.1  | -0.42480698  | 3.09E-09 | 7.23E-08 |
| TUBB1     | 20q13.32 | -0.424737932 | 3.11E-09 | 7.26E-08 |
| SGSM1     | 22q11.23 | -0.424731655 | 3.11E-09 | 7.26E-08 |
| CHP1      | 15q15.1  | 0.424666792  | 3.13E-09 | 7.30E-08 |
| CLDN4     | 7q11.23  | 0.424419894  | 3.20E-09 | 7.46E-08 |
| PI4KA     | 22q11.21 | -0.424350846 | 3.22E-09 | 7.50E-08 |
| TFF1      | 21q22.3  | 0.424269466  | 3.25E-09 | 7.53E-08 |
| RAPGEF4   | 2q31.1   | -0.424267152 | 3.25E-09 | 7.53E-08 |
| ACAT1     | 11q22.3  | -0.42426506  | 3.25E-09 | 7.53E-08 |



|          |            |               |           |           |
|----------|------------|---------------|-----------|-----------|
| ASB8     | 12q13. 11  | -0. 424181365 | 3. 27E-09 | 7. 58E-08 |
| SMURF1   | 7q22. 1    | 0. 423942837  | 3. 35E-09 | 7. 75E-08 |
| INIP     | 9q32       | -0. 423752432 | 3. 41E-09 | 7. 88E-08 |
| POLR3B   | 12q23. 3   | -0. 423382085 | 3. 53E-09 | 8. 15E-08 |
| TRAPPC6A | 19q13. 32  | 0. 4233507    | 3. 54E-09 | 8. 15E-08 |
| HCFC1R1  | 16p13. 3   | 0. 423348608  | 3. 54E-09 | 8. 15E-08 |
| BCL7C    | 16p11. 2   | 0. 423151926  | 3. 61E-09 | 8. 29E-08 |
| NDST2    | 10q22. 2   | -0. 423084971 | 3. 63E-09 | 8. 34E-08 |
| CHMP2A   | 19q13. 43  | 0. 423036846  | 3. 64E-09 | 8. 36E-08 |
| SRSF12   | 6q15       | -0. 422953152 | 3. 67E-09 | 8. 42E-08 |
| BLOC1S6  | 15q21. 1   | -0. 422934321 | 3. 68E-09 | 8. 43E-08 |
| ITPKA    | 15q15. 1   | 0. 422746009  | 3. 75E-09 | 8. 56E-08 |
| KCNA7    | 19q13. 33  | 0. 422471021  | 3. 84E-09 | 8. 78E-08 |
| FAM222B  | 17q11. 2   | 0. 422430063  | 3. 86E-09 | 8. 80E-08 |
| TENT5A   | 6q14. 1    | -0. 42221455  | 3. 94E-09 | 8. 97E-08 |
| ZNF600   | 19q13. 41  | 0. 422149687  | 3. 96E-09 | 9. 01E-08 |
| PLEKHM3  | 2q33. 3    | -0. 421896512 | 4. 05E-09 | 9. 22E-08 |
| ZNF625   | 19p13. 2   | -0. 421712385 | 4. 12E-09 | 9. 37E-08 |
| TRIM31   | 6p22. 1    | 0. 421558817  | 4. 18E-09 | 9. 48E-08 |
| PDE10A   | 6q27       | -0. 42155755  | 4. 18E-09 | 9. 48E-08 |
| ZBED2    | 3q13. 13   | 0. 42153476   | 4. 19E-09 | 9. 48E-08 |
| ZNF181   | 19q13. 11  | -0. 421532442 | 4. 19E-09 | 9. 48E-08 |
| DMXL1    | 5q23. 1    | -0. 421429917 | 4. 23E-09 | 9. 56E-08 |
| CRCT1    | 1q21. 3    | 0. 421348574  | 4. 27E-09 | 9. 62E-08 |
| VSIG1    | Xq22. 3    | 0. 421323206  | 4. 28E-09 | 9. 64E-08 |
| CYB561D1 | 1p13. 3    | -0. 421187203 | 4. 33E-09 | 9. 75E-08 |
| TXNDC16  | 14q22. 1   | -0. 421067939 | 4. 38E-09 | 9. 84E-08 |
| PRLR     | 5p13. 2    | -0. 420890089 | 4. 45E-09 | 1. 00E-07 |
| PRPS1    | Xq22. 3    | -0. 420871257 | 4. 46E-09 | 1. 00E-07 |
| RNF150   | 4q31. 21   | -0. 420716423 | 4. 52E-09 | 1. 01E-07 |
| FAM110A  | 20p13      | 0. 420645283  | 4. 55E-09 | 1. 02E-07 |
| CBFA2T2  | 20q11. 21- | -0. 420634821 | 4. 56E-09 | 1. 02E-07 |
| PHLPP2   | 16q22. 2   | -0. 420505095 | 4. 61E-09 | 1. 03E-07 |
| RGPD3    | 2q12. 2    | -0. 42032306  | 4. 69E-09 | 1. 05E-07 |
| AKIRIN1  | 1p34. 3    | -0. 420302136 | 4. 70E-09 | 1. 05E-07 |
| TMEM64   | 8q21. 3    | -0. 420268659 | 4. 72E-09 | 1. 05E-07 |
| TK1      | 17q25. 3   | 0. 42025192   | 4. 72E-09 | 1. 05E-07 |
| APBA1    | 9q21. 12   | -0. 420230996 | 4. 73E-09 | 1. 05E-07 |
| HDHD2    | 18q21. 1   | -0. 420224719 | 4. 73E-09 | 1. 05E-07 |
| FITM2    | 20q13. 12  | -0. 420205888 | 4. 74E-09 | 1. 05E-07 |
| GKAP1    | 9q21. 32   | -0. 420147302 | 4. 77E-09 | 1. 06E-07 |
| ME1      | 6q14. 2    | -0. 420048961 | 4. 81E-09 | 1. 06E-07 |
| SPINK5   | 5q32       | 0. 419910866  | 4. 87E-09 | 1. 08E-07 |
| RXYLT1   | 12q14. 2   | -0. 419866926 | 4. 89E-09 | 1. 08E-07 |
| HSPB1    | 7q11. 23   | 0. 419841818  | 4. 91E-09 | 1. 08E-07 |
| ID4      | 6p22. 3    | -0. 419799971 | 4. 92E-09 | 1. 08E-07 |
| PFKP     | 10p15. 2   | 0. 4197372    | 4. 95E-09 | 1. 09E-07 |
| GALE     | 1p36. 11   | 0. 419716276  | 4. 96E-09 | 1. 09E-07 |
| RTN4R    | 22q11. 21  | 0. 419626305  | 5. 00E-09 | 1. 10E-07 |
| LYPD2    | 8q24. 3    | 0. 419293289  | 5. 16E-09 | 1. 13E-07 |
| CYP2C18  | 10q23. 33  | 0. 419220607  | 5. 19E-09 | 1. 14E-07 |
| CPEB4    | 5q35. 2    | -0. 419189003 | 5. 21E-09 | 1. 14E-07 |
| DKK1     | 10q21. 1   | 0. 419170272  | 5. 22E-09 | 1. 14E-07 |
| KPNA5    | 6q22. 1    | -0. 419138786 | 5. 23E-09 | 1. 14E-07 |

|           |            |               |           |           |
|-----------|------------|---------------|-----------|-----------|
| GDPD2     | Xq13. 1    | 0. 419121351  | 5. 24E-09 | 1. 14E-07 |
| ADAP1     | 7p22. 3    | 0. 419065554  | 5. 27E-09 | 1. 15E-07 |
| FTSJ1     | Xp11. 23   | 0. 418806101  | 5. 40E-09 | 1. 17E-07 |
| FRS2      | 12q15      | -0. 418559203 | 5. 52E-09 | 1. 20E-07 |
| ZNF236    | 18q23      | -0. 418552926 | 5. 52E-09 | 1. 20E-07 |
| RHPN2     | 19q13. 11  | 0. 418337413  | 5. 64E-09 | 1. 22E-07 |
| LY6G6C    | 6p21. 33   | 0. 418113141  | 5. 75E-09 | 1. 25E-07 |
| USB1      | 16q21      | 0. 418013098  | 5. 81E-09 | 1. 26E-07 |
| TUBA4A    | 2q35       | 0. 417975436  | 5. 83E-09 | 1. 26E-07 |
| PARP4     | 13q12. 12  | 0. 417793401  | 5. 92E-09 | 1. 28E-07 |
| AHI1      | 6q23. 3    | -0. 417757831 | 5. 94E-09 | 1. 28E-07 |
| ZNF510    | 9q22. 33   | -0. 417636474 | 6. 01E-09 | 1. 29E-07 |
| HKDC1     | 10q22. 1   | 0. 417590442  | 6. 04E-09 | 1. 30E-07 |
| SLC39A11  | 17q24. 3-c | 0. 417374929  | 6. 16E-09 | 1. 32E-07 |
| SRD5A3    | 4q12       | 0. 417238926  | 6. 23E-09 | 1. 34E-07 |
| KLHL8     | 4q22. 1    | -0. 417025506 | 6. 36E-09 | 1. 36E-07 |
| SHISA5    | 3p21. 31   | 0. 417008767  | 6. 37E-09 | 1. 36E-07 |
| KCNN3     | 1q21. 3    | -0. 417006893 | 6. 37E-09 | 1. 36E-07 |
| PPP1R14B  | 11q13. 1   | 0. 416920888  | 6. 42E-09 | 1. 37E-07 |
| TSPAN7    | Xp11. 4    | -0. 416918796 | 6. 42E-09 | 1. 37E-07 |
| RWDD2A    | 6q14. 1    | -0. 416881133 | 6. 44E-09 | 1. 37E-07 |
| PLEKHM1P1 | 17q24. 1   | 0. 41681627   | 6. 48E-09 | 1. 38E-07 |
| ZNF709    | 19p13. 2   | -0. 416688636 | 6. 56E-09 | 1. 40E-07 |
| AMN       | 14q32. 32  | 0. 416680267  | 6. 56E-09 | 1. 40E-07 |
| FAM83E    | 19q13. 33  | 0. 416621681  | 6. 60E-09 | 1. 40E-07 |
| PRSS8     | 16p11. 2   | 0. 41659448   | 6. 61E-09 | 1. 40E-07 |
| TOR4A     | 9q34. 3    | 0. 416586111  | 6. 62E-09 | 1. 40E-07 |
| VEGFD     | Xp22. 2    | -0. 41654932  | 6. 64E-09 | 1. 41E-07 |
| MED23     | 6q23. 2    | -0. 416517063 | 6. 66E-09 | 1. 41E-07 |
| SAYSD1    | 6p21. 2    | -0. 416439646 | 6. 71E-09 | 1. 42E-07 |
| SENP1     | 12q13. 11  | -0. 416263888 | 6. 82E-09 | 1. 44E-07 |
| LRRC2     | 3p21. 31   | -0. 416251334 | 6. 82E-09 | 1. 44E-07 |
| TK2       | 16q21      | 0. 416213671  | 6. 85E-09 | 1. 44E-07 |
| RFC1      | 4p14       | -0. 41616764  | 6. 88E-09 | 1. 45E-07 |
| PCSK6     | 15q26. 3   | 0. 416115331  | 6. 91E-09 | 1. 45E-07 |
| ZC3H7B    | 22q13. 2   | -0. 416090222 | 6. 92E-09 | 1. 45E-07 |
| NADSYN1   | 11q13. 4   | 0. 416029544  | 6. 96E-09 | 1. 46E-07 |
| LIN52     | 14q24. 3   | -0. 415915728 | 7. 04E-09 | 1. 47E-07 |
| LINC01559 | 12p13. 1   | 0. 415897355  | 7. 05E-09 | 1. 47E-07 |
| SLC41A1   | 1q32. 1    | -0. 415851694 | 7. 08E-09 | 1. 48E-07 |
| PITPNM3   | 17p13. 2-f | 0. 415814031  | 7. 10E-09 | 1. 48E-07 |
| ADAM15    | 1q21. 3    | 0. 415692675  | 7. 18E-09 | 1. 50E-07 |
| SENP6     | 6q14. 1    | -0. 415650828 | 7. 21E-09 | 1. 50E-07 |
| MET       | 7q31. 2    | 0. 415636181  | 7. 22E-09 | 1. 50E-07 |
| FBXL4     | 6q16. 1-q1 | -0. 415600611 | 7. 24E-09 | 1. 50E-07 |
| RTP4      | 3q27. 3    | 0. 415598519  | 7. 24E-09 | 1. 50E-07 |
| EPS8L3    | 1p13. 3    | 0. 415555843  | 7. 27E-09 | 1. 51E-07 |
| ZNF318    | 6p21. 1    | -0. 415290942 | 7. 45E-09 | 1. 54E-07 |
| C1QTNF12  | 1p36. 33   | 0. 415239897  | 7. 48E-09 | 1. 55E-07 |
| GSS       | 20q11. 22  | 0. 415098663  | 7. 58E-09 | 1. 57E-07 |
| LINC0130C | 8q24. 3    | 0. 41505875   | 7. 61E-09 | 1. 57E-07 |
| TAF5      | 10q24. 33  | -0. 415010566 | 7. 64E-09 | 1. 58E-07 |
| OVOL1     | 11q13. 1   | 0. 414926043  | 7. 70E-09 | 1. 59E-07 |
| FAM122A   | 9q21. 11   | -0. 41488921  | 7. 73E-09 | 1. 59E-07 |

|          |           |              |          |          |
|----------|-----------|--------------|----------|----------|
| SLC8A1   | 2p22.1    | -0.414843178 | 7.76E-09 | 1.60E-07 |
| SRR      | 17p13.3   | -0.414728098 | 7.84E-09 | 1.61E-07 |
| KLB      | 4p14      | -0.414521822 | 7.99E-09 | 1.64E-07 |
| HINT3    | 6q22.32   | -0.414382859 | 8.09E-09 | 1.66E-07 |
| DNTTIP1  | 20q13.12  | 0.414380767  | 8.09E-09 | 1.66E-07 |
| PLAGL2   | 20q11.21  | -0.414328458 | 8.13E-09 | 1.66E-07 |
| ACACB    | 12q24.11  | -0.414313812 | 8.14E-09 | 1.66E-07 |
| HELQ     | 4q21.23   | -0.414313812 | 8.14E-09 | 1.66E-07 |
| WFDC10B  | 20q13.12  | 0.414125434  | 8.28E-09 | 1.69E-07 |
| GPRASP2  | Xq22.1    | -0.414121315 | 8.28E-09 | 1.69E-07 |
| TTC7A    | 2p21      | 0.414002051  | 8.37E-09 | 1.71E-07 |
| PLEKHA7  | 11p15.2-1 | 0.413987404  | 8.39E-09 | 1.71E-07 |
| TP53INP1 | 8q22.1    | -0.413907894 | 8.45E-09 | 1.72E-07 |
| FAM25BP  | 10q11.22  | 0.413890452  | 8.46E-09 | 1.72E-07 |
| EPHB4    | 7q22.1    | 0.413707028  | 8.60E-09 | 1.75E-07 |
| ARHGEF16 | 1p36.32   | 0.413554286  | 8.72E-09 | 1.77E-07 |
| HTT      | 4p16.3    | -0.413529178 | 8.74E-09 | 1.77E-07 |
| CAPN7    | 3p25.1    | -0.413485238 | 8.78E-09 | 1.78E-07 |
| GPR155   | 2q31.1    | -0.413397359 | 8.85E-09 | 1.79E-07 |
| FSCN1    | 7p22.1    | 0.413363882  | 8.87E-09 | 1.79E-07 |
| TBC1D20  | 20p13     | -0.413133723 | 9.06E-09 | 1.83E-07 |
| ZNF568   | 19q13.12  | -0.413110707 | 9.08E-09 | 1.83E-07 |
| ZDHHC5   | 11q12.1   | 0.412993535  | 9.17E-09 | 1.85E-07 |
| NQO1     | 16q22.1   | 0.412914025  | 9.24E-09 | 1.86E-07 |
| CHIC1    | Xq13.2    | -0.412907748 | 9.25E-09 | 1.86E-07 |
| CYP2W1   | 7p22.3    | 0.412867163  | 9.28E-09 | 1.86E-07 |
| DUOXA1   | 15q21.1   | 0.412865071  | 9.28E-09 | 1.86E-07 |
| DOP1A    | 6q14.1    | -0.412476723 | 9.61E-09 | 1.93E-07 |
| ANKRD52  | 12q13.3   | -0.412227732 | 9.83E-09 | 1.97E-07 |
| SF3B4    | 1q21.2    | 0.412054066  | 9.99E-09 | 2.00E-07 |
| SLC7A2   | 8p22      | -0.411947356 | 1.01E-08 | 2.01E-07 |
| NARS     | 18q21.31  | -0.411907602 | 1.01E-08 | 2.02E-07 |
| SNRPGP15 | 19p13.12  | 0.411689996  | 1.03E-08 | 2.06E-07 |
| NOP10    | 15q14     | 0.411673258  | 1.03E-08 | 2.06E-07 |
| ZC3H10   | 12q13.2   | -0.411491223 | 1.05E-08 | 2.09E-07 |
| ISCA1P1  | 5q12.1    | -0.411487038 | 1.05E-08 | 2.09E-07 |
| TOX      | 8q12.1    | -0.411482853 | 1.05E-08 | 2.09E-07 |
| FBXW8    | 12q24.22  | -0.411338481 | 1.07E-08 | 2.11E-07 |
| DHX58    | 17q21.2   | 0.411317557  | 1.07E-08 | 2.11E-07 |
| AKAP6    | 14q12     | -0.411135522 | 1.08E-08 | 2.15E-07 |
| HLTF     | 3q24      | -0.411110414 | 1.09E-08 | 2.15E-07 |
| MGAT4A   | 2q11.2    | -0.411066474 | 1.09E-08 | 2.16E-07 |
| CTAGE4   | 7q35      | 0.411007888  | 1.10E-08 | 2.16E-07 |
| NAP1L2   | Xq13.2    | -0.410909547 | 1.11E-08 | 2.18E-07 |
| DENND5B  | 12p11.21  | -0.410892809 | 1.11E-08 | 2.18E-07 |
| TRIM47   | 17q25.1   | 0.410813299  | 1.12E-08 | 2.20E-07 |
| CFL1     | 11q13.1   | 0.410802837  | 1.12E-08 | 2.20E-07 |
| NIBAN2   | 9q34.11   | 0.410691942  | 1.13E-08 | 2.22E-07 |
| ZADH2    | 18q22.3   | -0.41065428  | 1.13E-08 | 2.22E-07 |
| HOXB5    | 17q21.32  | 0.410497353  | 1.15E-08 | 2.25E-07 |
| PSEN1    | 14q24.2   | 0.41046806   | 1.15E-08 | 2.25E-07 |
| RHCE     | 1p36.11   | -0.410453628 | 1.15E-08 | 2.26E-07 |
| ABHD17B  | 9q21.13   | -0.410428305 | 1.16E-08 | 2.26E-07 |
| GNG5     | 1p22.3    | 0.410221162  | 1.18E-08 | 2.30E-07 |

|           |              |              |          |          |
|-----------|--------------|--------------|----------|----------|
| MYH16     | 7q22.1       | 0.410008896  | 1.20E-08 | 2.34E-07 |
| SMAD9     | 13q13.3      | -0.409988911 | 1.20E-08 | 2.34E-07 |
| FBXO30    | 6q24.3       | -0.409944971 | 1.21E-08 | 2.35E-07 |
| PLA2G10   | 16p13.12     | 0.409865676  | 1.22E-08 | 2.36E-07 |
| ADCY1     | 7p12.3       | -0.409831984 | 1.22E-08 | 2.37E-07 |
| ZDHHC17   | 12q21.2      | -0.409700165 | 1.23E-08 | 2.39E-07 |
| AATBC     | 21q22.3      | 0.409656226  | 1.24E-08 | 2.40E-07 |
| LOC644936 | 5q14.1       | 0.409649949  | 1.24E-08 | 2.40E-07 |
| SLC22A18  | 11p15.4      | 0.409595547  | 1.25E-08 | 2.41E-07 |
| RNF146    | 6q22.33      | -0.4095537   | 1.25E-08 | 2.42E-07 |
| SPDEF     | 6p21.31      | 0.409501391  | 1.26E-08 | 2.43E-07 |
| WNT7B     | 22q13.31     | 0.409472098  | 1.26E-08 | 2.43E-07 |
| TXN       | 9q31.3       | 0.40941142   | 1.27E-08 | 2.44E-07 |
| GJB2      | 13q12.11     | 0.409185446  | 1.29E-08 | 2.49E-07 |
| FGF13     | Xq26.3-q27.1 | -0.409159505 | 1.29E-08 | 2.49E-07 |
| GZF1      | 20p11.21     | -0.409156153 | 1.30E-08 | 2.49E-07 |
| KRT18     | 12q13.13     | 0.409097567  | 1.30E-08 | 2.50E-07 |
| PLCL1     | 2q33.1       | -0.409038981 | 1.31E-08 | 2.51E-07 |
| KCNB1     | 20q13.13     | -0.409038145 | 1.31E-08 | 2.51E-07 |
| TMEM159   | 16p12.3      | 0.408992949  | 1.31E-08 | 2.52E-07 |
| BCL10     | 1p22.3       | 0.408892516  | 1.33E-08 | 2.54E-07 |
| TMEM263   | 12q23.3      | -0.408787898 | 1.34E-08 | 2.56E-07 |
| SERTAD3   | 19q13.2      | 0.408771159  | 1.34E-08 | 2.56E-07 |
| MOSPD3    | 7q22.1       | 0.408706296  | 1.35E-08 | 2.57E-07 |
| NPR1      | 1q21.3       | -0.408484506 | 1.38E-08 | 2.62E-07 |
| SSR1      | 6p24.3       | -0.408428012 | 1.38E-08 | 2.63E-07 |
| ACOT9     | Xp22.11      | 0.408400812  | 1.39E-08 | 2.63E-07 |
| BCL9L     | 11q23.3      | 0.40839035   | 1.39E-08 | 2.63E-07 |
| ZBTB33    | Xq24         | -0.40831084  | 1.40E-08 | 2.65E-07 |
| PFDN2     | 1q23.3       | 0.408296194  | 1.40E-08 | 2.65E-07 |
| SERINC1   | 6q22.31      | -0.407787751 | 1.46E-08 | 2.77E-07 |
| ARRDC2    | 19p13.11     | 0.407747997  | 1.47E-08 | 2.78E-07 |
| ESPN      | 1p36.31      | 0.40751993   | 1.50E-08 | 2.83E-07 |
| GCKR      | 2p23.3       | 0.407268847  | 1.53E-08 | 2.89E-07 |
| ZNF37A    | 10p11.1      | -0.40726257  | 1.53E-08 | 2.89E-07 |
| MAPK3     | 16p11.2      | 0.407222815  | 1.54E-08 | 2.90E-07 |
| CCDC121   | 2p23.3       | -0.407180968 | 1.54E-08 | 2.91E-07 |
| PRKCE     | 2p21         | -0.407101458 | 1.56E-08 | 2.92E-07 |
| RNPEP     | 1q32.1       | 0.407099366  | 1.56E-08 | 2.92E-07 |
| ENPP2     | 8q24.12      | -0.407007302 | 1.57E-08 | 2.95E-07 |
| PAIP2B    | 2p13.3       | -0.406978009 | 1.57E-08 | 2.95E-07 |
| CDCP1     | 3p21.31      | 0.406971732  | 1.57E-08 | 2.95E-07 |
| ARPC1B    | 7q22.1       | 0.406938255  | 1.58E-08 | 2.96E-07 |
| TBC1D3B   | 17q12        | 0.406877576  | 1.59E-08 | 2.97E-07 |
| SEMA4G    | 10q24.31     | 0.406814806  | 1.60E-08 | 2.98E-07 |
| RGMB      | 5q15         | -0.406578369 | 1.63E-08 | 3.04E-07 |
| PPP1R7    | 2q37.3       | 0.406448643  | 1.65E-08 | 3.07E-07 |
| DDX60L    | 4q32.3       | 0.406295901  | 1.67E-08 | 3.11E-07 |
| ALDH3A1   | 17p11.2      | 0.406109681  | 1.70E-08 | 3.16E-07 |
| SEMA7A    | 15q24.1      | 0.406088758  | 1.70E-08 | 3.17E-07 |
| QSOX2     | 9q34.3       | -0.406074111 | 1.70E-08 | 3.17E-07 |
| RNF20     | 9q31.1       | -0.406049003 | 1.71E-08 | 3.17E-07 |
| PIK3C2G   | 12p12.3      | 0.406043106  | 1.71E-08 | 3.17E-07 |
| PAPSS2    | 10q23.2-c    | -0.406034356 | 1.71E-08 | 3.17E-07 |

|            |            |               |           |           |
|------------|------------|---------------|-----------|-----------|
| LETM2      | 8p11. 23   | 0. 405906723  | 1. 73E-08 | 3. 20E-07 |
| TBX15      | 1p12       | 0. 405829306  | 1. 74E-08 | 3. 22E-07 |
| RNF216     | 7p22. 1    | -0. 405634716 | 1. 77E-08 | 3. 27E-07 |
| TUBA1C     | 12q13. 12  | 0. 405530099  | 1. 79E-08 | 3. 30E-07 |
| CDC37      | 19p13. 2   | 0. 405425481  | 1. 80E-08 | 3. 33E-07 |
| KBTBD6     | 13q14. 11  | -0. 405216245 | 1. 84E-08 | 3. 39E-07 |
| EID3       | 12q23. 3   | -0. 405182767 | 1. 84E-08 | 3. 39E-07 |
| BICRAL     | 6p21. 1    | -0. 405145105 | 1. 85E-08 | 3. 40E-07 |
| PIGK       | 1p31. 1    | -0. 404971439 | 1. 88E-08 | 3. 45E-07 |
| ZNF582     | 19q13. 43  | -0. 404944239 | 1. 88E-08 | 3. 46E-07 |
| ZNF471     | 19q13. 43  | -0. 404739188 | 1. 92E-08 | 3. 52E-07 |
| HAS3       | 16q22. 1   | 0. 404718264  | 1. 92E-08 | 3. 52E-07 |
| BCL11A     | 2p16. 1    | -0. 404599    | 1. 94E-08 | 3. 55E-07 |
| PDZK1IP1   | 1p33       | 0. 404594815  | 1. 94E-08 | 3. 55E-07 |
| KLHL9      | 9p21. 3    | -0. 404504844 | 1. 96E-08 | 3. 58E-07 |
| APLP2      | 11q24. 3   | 0. 404477643  | 1. 96E-08 | 3. 58E-07 |
| CFAP73     | 12q24. 13  | 0. 40441278   | 1. 97E-08 | 3. 60E-07 |
| FAM8A1     | 6p22. 3    | -0. 404239115 | 2. 00E-08 | 3. 65E-07 |
| BACH2      | 6q15       | -0. 404153328 | 2. 02E-08 | 3. 67E-07 |
| CAPZA3     | 12p12. 3   | 0. 404145229  | 2. 02E-08 | 3. 67E-07 |
| TRIM23     | 5q12. 3    | -0. 403822736 | 2. 08E-08 | 3. 78E-07 |
| EFHD2      | 1p36. 21   | 0. 40376415   | 2. 09E-08 | 3. 79E-07 |
| PLA2G12A   | 4q25       | -0. 403653255 | 2. 11E-08 | 3. 82E-07 |
| SPOP       | 17q21. 33  | -0. 403638608 | 2. 11E-08 | 3. 82E-07 |
| RBM18      | 9q33. 2    | -0. 403636516 | 2. 11E-08 | 3. 82E-07 |
| IP6K1      | 3p21. 31   | -0. 403607223 | 2. 12E-08 | 3. 83E-07 |
| OAS1       | 12q24. 13  | 0. 40354236   | 2. 13E-08 | 3. 85E-07 |
| LRRC1      | 6p12. 1    | 0. 40353399   | 2. 13E-08 | 3. 85E-07 |
| KLF2       | 19p13. 11  | 0. 403452388  | 2. 15E-08 | 3. 87E-07 |
| MMP11      | 22q11. 23  | 0. 403406357  | 2. 15E-08 | 3. 89E-07 |
| MED15      | 22q11. 21  | 0. 40339171   | 2. 16E-08 | 3. 89E-07 |
| B3GALT4    | 6p21. 32   | 0. 403280815  | 2. 18E-08 | 3. 92E-07 |
| IFI35      | 17q21. 31  | 0. 403207583  | 2. 19E-08 | 3. 94E-07 |
| ZNF25      | 10p11. 21  | -0. 40320549  | 2. 19E-08 | 3. 94E-07 |
| UPK2       | 11q23. 3   | 0. 40318094   | 2. 20E-08 | 3. 94E-07 |
| GTF2F2     | 13q14. 12- | 0. 403165736  | 2. 20E-08 | 3. 95E-07 |
| EPAS1      | 2p21       | -0. 402954408 | 2. 24E-08 | 4. 02E-07 |
| FAM53B     | 10q26. 13  | -0. 402941853 | 2. 24E-08 | 4. 02E-07 |
| TMTC1      | 12p11. 22  | -0. 402847697 | 2. 26E-08 | 4. 05E-07 |
| HIST2H2AA1 | 1q21. 2    | 0. 402713787  | 2. 29E-08 | 4. 09E-07 |
| MPDZ       | 9p23       | -0. 402561045 | 2. 32E-08 | 4. 14E-07 |
| GNA12      | 7p22. 3-p2 | -0. 402397841 | 2. 35E-08 | 4. 20E-07 |
| NXNL2      | 9q22. 1    | 0. 402323666  | 2. 37E-08 | 4. 22E-07 |
| ZNF844     | 19p13. 2   | -0. 402284853 | 2. 38E-08 | 4. 23E-07 |
| PLAUR      | 19q13. 31  | 0. 402155127  | 2. 40E-08 | 4. 28E-07 |
| NFASC      | 1q32. 1    | -0. 401994016 | 2. 44E-08 | 4. 33E-07 |
| MAGEE1     | Xq13. 3    | -0. 401922876 | 2. 45E-08 | 4. 36E-07 |
| LIPH       | 3q27. 2    | 0. 401883121  | 2. 46E-08 | 4. 37E-07 |
| SLC36A4    | 11q21      | -0. 401600653 | 2. 52E-08 | 4. 47E-07 |
| PIAS3      | 1q21. 1    | 0. 401546252  | 2. 53E-08 | 4. 49E-07 |
| ANKH       | 5p15. 2    | -0. 401334924 | 2. 58E-08 | 4. 57E-07 |
| SCNN1A     | 12p13. 31  | 0. 40127843   | 2. 59E-08 | 4. 59E-07 |
| CYP3A5     | 7q22. 1    | 0. 401219844  | 2. 61E-08 | 4. 61E-07 |
| WWC2-AS2   | 4q35. 1    | 0. 401150796  | 2. 62E-08 | 4. 63E-07 |

|           |           |              |          |          |
|-----------|-----------|--------------|----------|----------|
| RAB1B     | 11q13.2   | 0.401123596  | 2.63E-08 | 4.64E-07 |
| 8-Mar     | 10q11.21- | -0.401071287 | 2.64E-08 | 4.65E-07 |
| KLHL11    | 17q21.2   | -0.401037809 | 2.65E-08 | 4.66E-07 |
| KCNK6     | 19q13.2   | 0.400977131  | 2.66E-08 | 4.68E-07 |
| LEMD3     | 12q14.3   | -0.400931099 | 2.67E-08 | 4.70E-07 |
| GPR75     | 2p16.2    | -0.400898877 | 2.68E-08 | 4.71E-07 |
| TSPAN33   | 7q32.1    | -0.400868328 | 2.69E-08 | 4.72E-07 |
| FAM227B   | 15q21.2   | -0.400828573 | 2.70E-08 | 4.73E-07 |
| NT5C      | 17q25.1   | 0.400822296  | 2.70E-08 | 4.73E-07 |
| AAK1      | 2p13.3    | -0.400778357 | 2.71E-08 | 4.74E-07 |
| BRPF3     | 6p21.31   | -0.40077208  | 2.71E-08 | 4.74E-07 |
| DBNDD2    | 20q13.12  | 0.400740694  | 2.72E-08 | 4.75E-07 |
| TMED8     | 14q24.3   | -0.400717678 | 2.72E-08 | 4.75E-07 |
| HOXB6     | 17q21.32  | 0.400690478  | 2.73E-08 | 4.76E-07 |
| ACOT4     | 14q24.3   | 0.40047078   | 2.78E-08 | 4.85E-07 |
| ECPAS     | 9q31.3    | -0.400422656 | 2.79E-08 | 4.86E-07 |
| AOC1      | 7q36.1    | 0.400393363  | 2.80E-08 | 4.87E-07 |
| C6ORF223  | 6p21.1    | 0.400366162  | 2.81E-08 | 4.88E-07 |
| S100A13   | 1q21.3    | 0.400117172  | 2.87E-08 | 4.98E-07 |
| CYFIP2    | 5q33.3    | -0.400073232 | 2.88E-08 | 5.00E-07 |
| OVOL2     | 20p11.23  | 0.39992886   | 2.92E-08 | 5.05E-07 |
| KDM8      | 16p12.1   | -0.399878852 | 2.93E-08 | 5.07E-07 |
| OR7E91P   | 2p13.3    | 0.399746125  | 2.96E-08 | 5.13E-07 |
| SALL2     | 14q11.2   | -0.399704978 | 2.97E-08 | 5.14E-07 |
| HNRNPA1P3 | 10q11.22  | 0.39963593   | 2.99E-08 | 5.16E-07 |
| ZNF569    | 19q13.12  | -0.39963593  | 2.99E-08 | 5.16E-07 |
| IGF2BP2   | 3q27.2    | 0.399489465  | 3.03E-08 | 5.22E-07 |
| ZRANB3    | 2q21.3    | -0.399382755 | 3.06E-08 | 5.27E-07 |
| ANK2      | 4q25-q26  | -0.399315799 | 3.07E-08 | 5.29E-07 |
| SEC23B    | 20p11.23  | -0.399068901 | 3.14E-08 | 5.40E-07 |
| MIEF1     | 22q13.1   | -0.399012408 | 3.16E-08 | 5.42E-07 |
| SLC26A11  | 17q25.3   | -0.398958006 | 3.17E-08 | 5.45E-07 |
| UHRF1BP1  | 6p21.31   | -0.398897537 | 3.19E-08 | 5.47E-07 |
| ZNF689    | 16p11.2   | -0.398874312 | 3.19E-08 | 5.48E-07 |
| NME2      | 17q21.33  | 0.398809449  | 3.21E-08 | 5.50E-07 |
| ELP1      | 9q31.3    | -0.398798987 | 3.21E-08 | 5.50E-07 |
| ZMIZ1     | 10q22.3   | -0.39872157  | 3.24E-08 | 5.53E-07 |
| BCL2L15   | 1p13.2    | 0.398497688  | 3.30E-08 | 5.64E-07 |
| CA8       | 8q12.1    | -0.398349131 | 3.34E-08 | 5.70E-07 |
| CADM1     | 11q23.3   | -0.398229866 | 3.38E-08 | 5.76E-07 |
| CEP112    | 17q24.1   | -0.398112694 | 3.41E-08 | 5.81E-07 |
| UCA1      | 19p13.12  | 0.397992373  | 3.45E-08 | 5.86E-07 |
| ERC1      | 12p13.33  | -0.397989245 | 3.45E-08 | 5.86E-07 |
| EPC2      | 2q23.1    | -0.397934844 | 3.46E-08 | 5.89E-07 |
| CAMK2N1   | 1p36.12   | 0.397880443  | 3.48E-08 | 5.91E-07 |
| SOBP      | 6q21      | -0.39784278  | 3.49E-08 | 5.92E-07 |
| CCSAP     | 1q42.13   | -0.397803026 | 3.50E-08 | 5.94E-07 |
| RP1       | 8q11.23-c | 0.397614987  | 3.56E-08 | 6.03E-07 |
| IKZF4     | 12q13.2   | -0.397508003 | 3.59E-08 | 6.08E-07 |
| ASTN2     | 9q33.1    | -0.397476618 | 3.60E-08 | 6.09E-07 |
| NUP153    | 6p22.3    | -0.397388739 | 3.63E-08 | 6.13E-07 |
| ZNF507    | 19q13.11  | -0.397372    | 3.64E-08 | 6.14E-07 |
| SLC04A1   | 20q13.33  | 0.397315506  | 3.65E-08 | 6.16E-07 |
| FNDC3A    | 13q14.2   | -0.397169041 | 3.70E-08 | 6.23E-07 |

|          |           |              |          |          |
|----------|-----------|--------------|----------|----------|
| UTP20    | 12q23.2   | -0.397093717 | 3.72E-08 | 6.27E-07 |
| REPS1    | 6q24.1    | -0.397081163 | 3.73E-08 | 6.27E-07 |
| FAM168B  | 2q21.1    | -0.39707907  | 3.73E-08 | 6.27E-07 |
| H1FO     | 22q13.1   | 0.396995376  | 3.75E-08 | 6.31E-07 |
| KMT2C    | 7q36.1    | -0.39697236  | 3.76E-08 | 6.31E-07 |
| RAB3C    | 5q11.2    | -0.396920259 | 3.78E-08 | 6.34E-07 |
| LY6D     | 8q24.3    | 0.396796327  | 3.82E-08 | 6.40E-07 |
| FICD     | 12q23.3   | -0.39678614  | 3.82E-08 | 6.40E-07 |
| TMEM219  | 16p11.2   | 0.396761032  | 3.83E-08 | 6.40E-07 |
| RNF180   | 5q12.3    | -0.396754755 | 3.83E-08 | 6.40E-07 |
| KYAT1    | 9q34.11   | 0.396745547  | 3.84E-08 | 6.40E-07 |
| GHR      | 5p13.1-p1 | -0.396694077 | 3.85E-08 | 6.43E-07 |
| OTULINL  | 5p15.2    | -0.396625029 | 3.88E-08 | 6.46E-07 |
| RANBP2   | 2q13      | -0.396451363 | 3.93E-08 | 6.55E-07 |
| DTD2     | 14q12     | -0.396405331 | 3.95E-08 | 6.57E-07 |
| EBF1     | 5q33.3    | -0.396399054 | 3.95E-08 | 6.57E-07 |
| RIN1     | 11q13.2   | 0.396340468  | 3.97E-08 | 6.60E-07 |
| TMC4     | 19q13.42  | 0.396292344  | 3.99E-08 | 6.62E-07 |
| ITGB5    | 3q21.2    | 0.396210742  | 4.02E-08 | 6.66E-07 |
| ARHGEF18 | 19p13.2   | 0.396047538  | 4.07E-08 | 6.75E-07 |
| APRT     | 16q24.3   | 0.395938736  | 4.11E-08 | 6.81E-07 |
| SOCS7    | 17q12     | -0.39584458  | 4.14E-08 | 6.86E-07 |
| MT01     | 6q13      | -0.395716946 | 4.19E-08 | 6.92E-07 |
| ITPK1    | 14q32.12  | 0.395606051  | 4.23E-08 | 6.98E-07 |
| LYPLA2   | 1p36.11   | 0.395488879  | 4.27E-08 | 7.05E-07 |
| CAMKK1   | 17p13.2   | -0.395417739 | 4.30E-08 | 7.09E-07 |
| CAPS2    | 12q21.1-c | -0.395070614 | 4.43E-08 | 7.29E-07 |
| NKAIN4   | 20q13.33  | 0.395061057  | 4.43E-08 | 7.29E-07 |
| CLASP2   | 3p22.3    | -0.395032745 | 4.44E-08 | 7.30E-07 |
| SRC      | 20q11.23  | 0.394936497  | 4.48E-08 | 7.36E-07 |
| SLC8A3   | 14q24.2   | -0.394910123 | 4.49E-08 | 7.37E-07 |
| KLF9     | 9q21.12   | -0.394877911 | 4.50E-08 | 7.38E-07 |
| PPM1K    | 4q22.1    | -0.394729354 | 4.56E-08 | 7.47E-07 |
| EBP      | Xp11.23   | 0.394723077  | 4.56E-08 | 7.47E-07 |
| CTC1     | 17p13.1   | -0.394674952 | 4.58E-08 | 7.49E-07 |
| MUC21    | 6p21.33   | 0.394572253  | 4.62E-08 | 7.55E-07 |
| CPE      | 4q32.3    | -0.39456615  | 4.62E-08 | 7.55E-07 |
| SPTBN2   | 11q13.2   | 0.39452221   | 4.64E-08 | 7.57E-07 |
| MAVS     | 20p13     | -0.394363191 | 4.70E-08 | 7.67E-07 |
| MVD      | 16q24.2   | 0.394285774  | 4.73E-08 | 7.71E-07 |
| LGALS3BP | 17q25.3   | 0.394128847  | 4.80E-08 | 7.81E-07 |
| HTATIP2  | 11p15.1   | 0.394093277  | 4.81E-08 | 7.83E-07 |
| MUC20    | 3q29      | 0.393938443  | 4.87E-08 | 7.93E-07 |
| TOGARAM1 | 14q21.2   | -0.393867303 | 4.90E-08 | 7.97E-07 |
| OAZ2     | 15q22.31  | -0.393812901 | 4.93E-08 | 8.00E-07 |
| TEX2     | 17q23.3   | -0.393789886 | 4.94E-08 | 8.01E-07 |
| MDC1     | 6p21.33   | -0.393714561 | 4.97E-08 | 8.05E-07 |
| BPNT1    | 1q41      | 0.393710376  | 4.97E-08 | 8.05E-07 |
| PXK      | 3p14.3    | -0.393689452 | 4.98E-08 | 8.06E-07 |
| PFAS     | 17p13.1   | -0.393666437 | 4.99E-08 | 8.06E-07 |
| KIAA1147 | 7q34      | -0.393658067 | 4.99E-08 | 8.06E-07 |
| UBE2D4   | 7p13      | -0.393519972 | 5.05E-08 | 8.15E-07 |
| NRSN2    | 20p13     | -0.393344214 | 5.13E-08 | 8.27E-07 |
| ITPR1    | 3p26.1    | -0.393264704 | 5.16E-08 | 8.32E-07 |

|          |          |              |          |          |
|----------|----------|--------------|----------|----------|
| ARHGAP35 | 19q13.32 | -0.393126608 | 5.22E-08 | 8.41E-07 |
| FAM222A  | 12q24.11 | -0.39306593  | 5.25E-08 | 8.45E-07 |
| WDR31    | 9q32     | -0.392565857 | 5.47E-08 | 8.80E-07 |
| ITGA6    | 2q31.1   | 0.392517733  | 5.50E-08 | 8.83E-07 |
| MYL12A   | 18p11.31 | 0.392367083  | 5.57E-08 | 8.94E-07 |
| TTC37    | 5q15     | -0.392348252 | 5.58E-08 | 8.95E-07 |
| CCND2    | 12p13.32 | -0.392252003 | 5.62E-08 | 9.01E-07 |
| MYO5A    | 15q21.2  | -0.392247819 | 5.62E-08 | 9.01E-07 |
| RHBDL3   | 17q11.2  | -0.392201787 | 5.65E-08 | 9.03E-07 |
| ATP5F1A  | 18q21.1  | -0.392197602 | 5.65E-08 | 9.03E-07 |
| MDM1     | 12q15    | -0.392128554 | 5.68E-08 | 9.08E-07 |
| MFSD13A  | 10q24.32 | 0.392067876  | 5.71E-08 | 9.12E-07 |
| SPACA4   | 19q13.33 | 0.392026234  | 5.73E-08 | 9.14E-07 |
| TMEM131L | 4q31.3   | -0.391892118 | 5.80E-08 | 9.24E-07 |
| TRIM15   | 6p22.1   | 0.391697442  | 5.89E-08 | 9.38E-07 |
| RIOK3    | 18q11.2  | 0.391649405  | 5.92E-08 | 9.41E-07 |
| C16ORF96 | 16p13.3  | -0.391633026 | 5.92E-08 | 9.42E-07 |
| EIF4B    | 12q13.13 | -0.391392045 | 6.04E-08 | 9.60E-07 |
| TMEM179B | 11q12.3  | 0.391343921  | 6.07E-08 | 9.64E-07 |
| ATP10D   | 4p12     | -0.391287427 | 6.10E-08 | 9.67E-07 |
| SGCE     | 7q21.3   | -0.391264411 | 6.11E-08 | 9.68E-07 |
| DPP3     | 11q13.2  | 0.391264411  | 6.11E-08 | 9.68E-07 |
| SBN02    | 19p13.3  | 0.391239303  | 6.12E-08 | 9.69E-07 |
| SMAP2    | 1p34.2   | -0.391228841 | 6.13E-08 | 9.69E-07 |
| RAD1     | 5p13.2   | -0.391182809 | 6.15E-08 | 9.72E-07 |
| GPC1     | 2q37.3   | 0.391140962  | 6.17E-08 | 9.75E-07 |
| RAB11A   | 15q22.31 | 0.391128408  | 6.18E-08 | 9.75E-07 |
| MLKL     | 16q23.1  | 0.391038437  | 6.23E-08 | 9.82E-07 |
| GXYLT1   | 12q12    | -0.391002867 | 6.25E-08 | 9.84E-07 |
| UFL1     | 6q16.1   | -0.390871048 | 6.32E-08 | 9.94E-07 |
| PRUNE2   | 9q21.2   | -0.390850124 | 6.33E-08 | 9.95E-07 |
| PIK3C3   | 18q12.3  | -0.390839663 | 6.33E-08 | 9.95E-07 |
| PDXP     | 22q13.1  | -0.390762246 | 6.37E-08 | 1E-06    |
| MICU3    | 8p22     | -0.390758061 | 6.38E-08 | 1E-06    |
| CYTH2    | 19q13.33 | 0.390682736  | 6.42E-08 | 1.01E-06 |
| KDR      | 4q12     | -0.39065972  | 6.43E-08 | 1.01E-06 |
| GDAP1    | 8q21.11  | -0.390611596 | 6.45E-08 | 1.01E-06 |
| PPM1A    | 14q23.1  | -0.390567656 | 6.48E-08 | 1.01E-06 |
| PANK1    | 10q23.31 | -0.390521625 | 6.50E-08 | 1.02E-06 |
| SCNM1    | 1q21.3   | 0.3904463    | 6.54E-08 | 1.02E-06 |
| GSTK1    | 7q34     | 0.390442115  | 6.55E-08 | 1.02E-06 |
| TRPM6    | 9q21.13  | -0.390417824 | 6.56E-08 | 1.02E-06 |
| DUSP7    | 3p21.2   | 0.390406545  | 6.57E-08 | 1.02E-06 |
| JUNB     | 19p13.13 | 0.39033122   | 6.61E-08 | 1.03E-06 |
| PJA2     | 5q21.3   | -0.390322851 | 6.61E-08 | 1.03E-06 |
| FOXD1    | 5q13.2   | 0.390115707  | 6.73E-08 | 1.05E-06 |
| ZNF132   | 19q13.43 | -0.39010943  | 6.73E-08 | 1.05E-06 |
| PRKN     | 6q26     | -0.390029921 | 6.78E-08 | 1.05E-06 |
| SERPINB1 | 6p25.2   | 0.390013182  | 6.79E-08 | 1.05E-06 |
| DUOX1    | 15q21.1  | 0.389990166  | 6.80E-08 | 1.05E-06 |
| C8ORF58  | 8p21.3   | 0.389969242  | 6.81E-08 | 1.05E-06 |
| EDNRB    | 13q22.3  | -0.38975373  | 6.94E-08 | 1.07E-06 |
| MYH10    | 17p13.1  | -0.389741175 | 6.94E-08 | 1.07E-06 |
| PRKAR1A  | 17q24.2  | -0.389676312 | 6.98E-08 | 1.08E-06 |



|            |            |              |          |          |
|------------|------------|--------------|----------|----------|
| MRPS6      | 21q22.11   | 0.389613542  | 7.02E-08 | 1.08E-06 |
| NFATC2     | 20q13.2    | -0.389594711 | 7.03E-08 | 1.08E-06 |
| TMEM154    | 4q31.3     | 0.389561233  | 7.05E-08 | 1.09E-06 |
| IGFBP6     | 12q13.13   | 0.389502647  | 7.08E-08 | 1.09E-06 |
| PRR5-ARHC  | 22q13.31   | 0.389226399  | 7.25E-08 | 1.12E-06 |
| ZNF667     | 19q13.43   | -0.389130207 | 7.31E-08 | 1.12E-06 |
| HLA-F-AS16 | p22.1      | 0.389117653  | 7.32E-08 | 1.12E-06 |
| CYB5RL     | 1p32.3     | -0.389100914 | 7.33E-08 | 1.12E-06 |
| IL17RE     | 3p25.3     | 0.38906116   | 7.35E-08 | 1.13E-06 |
| KCTD5      | 16p13.3    | 0.388864478  | 7.47E-08 | 1.15E-06 |
| NEK9       | 14q24.3    | -0.388837277 | 7.49E-08 | 1.15E-06 |
| SDK2       | 17q25.1    | -0.388753583 | 7.54E-08 | 1.15E-06 |
| NFKB1B     | 19q13.2    | 0.388741029  | 7.55E-08 | 1.15E-06 |
| KCNJ8      | 12p12.1    | -0.388713828 | 7.57E-08 | 1.16E-06 |
| KLK7       | 19q13.41   | 0.388679097  | 7.59E-08 | 1.16E-06 |
| ISG15      | 1p36.33    | 0.3885025    | 7.70E-08 | 1.17E-06 |
| CTSV       | 9q22.33    | 0.388425083  | 7.75E-08 | 1.18E-06 |
| PDCD4      | 10q25.2    | -0.388416714 | 7.76E-08 | 1.18E-06 |
| CTAGE9     | 6q23.2     | 0.388410437  | 7.76E-08 | 1.18E-06 |
| SMG6       | 17p13.3    | -0.388347666 | 7.80E-08 | 1.19E-06 |
| SGTB       | 5q12.3     | -0.38828908  | 7.84E-08 | 1.19E-06 |
| CRY1       | 12q23.3    | -0.388188647 | 7.90E-08 | 1.2E-06  |
| ASF1B      | 19p13.12   | 0.38818237   | 7.91E-08 | 1.2E-06  |
| CNOT11     | 2q11.2     | 0.388165631  | 7.92E-08 | 1.2E-06  |
| CNN2       | 19p13.3    | 0.388048459  | 8.00E-08 | 1.21E-06 |
| DNAH3      | 16p12.3    | 0.387996087  | 8.03E-08 | 1.22E-06 |
| TSPYL4     | 6q22.1     | -0.387868516 | 8.12E-08 | 1.23E-06 |
| PITPNA     | 17p13.3    | -0.387847593 | 8.13E-08 | 1.23E-06 |
| ASXL3      | 18q12.1    | -0.387839223 | 8.14E-08 | 1.23E-06 |
| DGAT1      | 8q24.3     | 0.387772268  | 8.18E-08 | 1.24E-06 |
| FDFT1      | 8p23.1     | 0.387663465  | 8.26E-08 | 1.25E-06 |
| MDFI       | 6p21.1     | 0.387611156  | 8.29E-08 | 1.25E-06 |
| ZFX        | Xp22.11    | -0.387604879 | 8.30E-08 | 1.25E-06 |
| SF3B6      | 2p23.3     | 0.38756094   | 8.33E-08 | 1.25E-06 |
| SLC46A1    | 17q11.2    | -0.387504446 | 8.37E-08 | 1.26E-06 |
| KLHDC10    | 7q32.2     | -0.387473061 | 8.39E-08 | 1.26E-06 |
| MTRF1L     | 6q25.2     | -0.387456322 | 8.40E-08 | 1.26E-06 |
| NLGN4X     | Xp22.32-1  | -0.387284749 | 8.52E-08 | 1.28E-06 |
| MSANTD4    | 11q22.3    | -0.387219886 | 8.57E-08 | 1.28E-06 |
| ARPC2      | 2q35       | 0.387192685  | 8.59E-08 | 1.29E-06 |
| NRN1       | 6p25.1     | -0.387192685 | 8.59E-08 | 1.29E-06 |
| AKT3       | 1q43-q44   | -0.387157115 | 8.61E-08 | 1.29E-06 |
| FYN        | 6q21       | -0.387060867 | 8.68E-08 | 1.3E-06  |
| PAQR4      | 16p13.3    | 0.38697508   | 8.74E-08 | 1.31E-06 |
| SERPIN6    | 6p25.2     | 0.386968803  | 8.75E-08 | 1.31E-06 |
| TAX1BP3    | 17p13.2    | 0.386949972  | 8.76E-08 | 1.31E-06 |
| ATP9B      | 18q23      | -0.386933233 | 8.77E-08 | 1.31E-06 |
| POU5F1B    | 8q24.21    | 0.386830066  | 8.85E-08 | 1.32E-06 |
| OTUB1      | 11q13.1    | 0.386786768  | 8.88E-08 | 1.32E-06 |
| BBC3       | 19q13.32   | 0.386780491  | 8.89E-08 | 1.32E-06 |
| GJA9       | 1p34.3     | 0.386700981  | 8.95E-08 | 1.33E-06 |
| PPP1R1C    | 2q31.3-q32 | 0.386579625  | 9.04E-08 | 1.34E-06 |
| DCK        | 4q13.3     | -0.386560793 | 9.05E-08 | 1.34E-06 |
| COX10      | 17p12      | -0.386514762 | 9.08E-08 | 1.35E-06 |

|           |           |               |           |           |
|-----------|-----------|---------------|-----------|-----------|
| ALDH5A1   | 6p22. 3   | -0. 386343188 | 9. 21E-08 | 1. 37E-06 |
| TMEM30A   | 6q14. 1   | -0. 38628251  | 9. 26E-08 | 1. 37E-06 |
| NEXMIF    | Xq13. 3   | -0. 386254465 | 9. 28E-08 | 1. 37E-06 |
| MELTF     | 3q29      | 0. 386190446  | 9. 33E-08 | 1. 38E-06 |
| PRDM4     | 12q23. 3  | -0. 385988736 | 9. 49E-08 | 1. 4E-06  |
| SAMD9     | 7q21. 2   | 0. 385830561  | 9. 61E-08 | 1. 42E-06 |
| SHKBP1    | 19q13. 2  | 0. 385822192  | 9. 62E-08 | 1. 42E-06 |
| MTMR14    | 3p25. 3   | 0. 385799176  | 9. 64E-08 | 1. 42E-06 |
| HOXB7     | 17q21. 32 | 0. 385765698  | 9. 67E-08 | 1. 42E-06 |
| SCN8A     | 12q13. 13 | -0. 385673634 | 9. 74E-08 | 1. 43E-06 |
| ENDOV     | 17q25. 3  | 0. 385658988  | 9. 75E-08 | 1. 43E-06 |
| TMEM133   | 11q22. 1  | 0. 385654803  | 9. 75E-08 | 1. 43E-06 |
| LOC283856 | 16q13     | -0. 385563991 | 9. 83E-08 | 1. 44E-06 |
| DCAF10    | 9p13. 2   | -0. 385558555 | 9. 83E-08 | 1. 44E-06 |
| SLC44A4   | 6p21. 33  | 0. 385516707  | 9. 87E-08 | 1. 45E-06 |
| EML5      | 14q31. 3  | -0. 38544766  | 9. 92E-08 | 1. 45E-06 |
| TNIP1     | 5q33. 1   | 0. 385416274  | 9. 95E-08 | 1. 46E-06 |
| OSGIN1    | 16q23. 3  | 0. 385395351  | 9. 97E-08 | 1. 46E-06 |
| ABCA5     | 17q24. 3  | -0. 385305379 | 1. 00E-07 | 1. 47E-06 |
| DICER1    | 14q32. 13 | -0. 385253071 | 1. 01E-07 | 1. 47E-06 |
| LOC728024 | 8p11. 23  | -0. 385213316 | 1. 01E-07 | 1. 48E-06 |
| SLC25A37  | 8p21. 2   | 0. 385204946  | 1. 01E-07 | 1. 48E-06 |
| HPDL      | 1p34. 1   | 0. 385186115  | 1. 01E-07 | 1. 48E-06 |
| ADGRF3    | 2p23. 3   | -0. 385163099 | 1. 02E-07 | 1. 48E-06 |
| RBM23     | 14q11. 2  | -0. 385104513 | 1. 02E-07 | 1. 49E-06 |
| CEACAM1   | 19q13. 2  | 0. 385056389  | 1. 02E-07 | 1. 49E-06 |
| MECP2     | Xq28      | -0. 384964325 | 1. 03E-07 | 1. 5E-06  |
| LONRF2    | 2q11. 2   | -0. 384937125 | 1. 03E-07 | 1. 5E-06  |
| KPNA7     | 7q22. 1   | 0. 384855364  | 1. 04E-07 | 1. 51E-06 |
| EID1      | 15q21. 1  | -0. 384774122 | 1. 05E-07 | 1. 52E-06 |
| ARL1      | 12q23. 2  | -0. 384709058 | 1. 05E-07 | 1. 53E-06 |
| PLAAT4    | 11q12. 3  | 0. 384704873  | 1. 05E-07 | 1. 53E-06 |
| SLC22A18A | 11p15. 4  | 0. 384619288  | 1. 06E-07 | 1. 54E-06 |
| SNX33     | 15q24. 2  | 0. 384556316  | 1. 07E-07 | 1. 54E-06 |
| EEA1      | 12q22     | -0. 384547946 | 1. 07E-07 | 1. 54E-06 |
| CEACAM5   | 19q13. 2  | 0. 38452155   | 1. 07E-07 | 1. 55E-06 |
| LOC653653 | 17q23. 1  | -0. 384516561 | 1. 07E-07 | 1. 55E-06 |
| METAP2    | 12q22     | -0. 38449773  | 1. 07E-07 | 1. 55E-06 |
| PDE4B     | 1p31. 3   | -0. 384495637 | 1. 07E-07 | 1. 55E-06 |
| RALY      | 20q11. 22 | 0. 384188061  | 1. 10E-07 | 1. 59E-06 |
| TNFRSF6B  | 20q13. 33 | 0. 384150399  | 1. 10E-07 | 1. 59E-06 |
| GAPVD1    | 9q33. 3   | -0. 384108551 | 1. 11E-07 | 1. 59E-06 |
| PROSER2   | 10p14     | 0. 384072981  | 1. 11E-07 | 1. 6E-06  |
| TNNT1     | 19q13. 42 | 0. 384060135  | 1. 11E-07 | 1. 6E-06  |
| STEAP3    | 2q14. 2   | 0. 384047873  | 1. 11E-07 | 1. 6E-06  |
| ARSB      | 5q14. 1   | -0. 383993472 | 1. 12E-07 | 1. 6E-06  |
| CAPN12    | 19q13. 2  | 0. 383985102  | 1. 12E-07 | 1. 6E-06  |
| BTRC      | 10q24. 32 | -0. 383980918 | 1. 12E-07 | 1. 6E-06  |
| CLCN4     | Xp22. 2   | -0. 383936133 | 1. 12E-07 | 1. 61E-06 |
| CKS1B     | 1q21. 3   | 0. 383884669  | 1. 13E-07 | 1. 61E-06 |
| CARNS1    | 11q13. 2  | 0. 383826083  | 1. 13E-07 | 1. 62E-06 |
| TMEM150C  | 4q21. 22  | -0. 383798883 | 1. 14E-07 | 1. 62E-06 |
| SLC39A1   | 1q21. 3   | 0. 383704727  | 1. 15E-07 | 1. 63E-06 |
| OSBPL6    | 2q31. 2   | -0. 383595924 | 1. 16E-07 | 1. 65E-06 |

|          |             |               |           |           |
|----------|-------------|---------------|-----------|-----------|
| GPR148   | 2q21. 1     | -0. 38356975  | 1. 16E-07 | 1. 65E-06 |
| RFX3     | 9p24. 2     | -0. 38353943  | 1. 16E-07 | 1. 65E-06 |
| PPDPF    | 20q13. 33   | 0. 383522692  | 1. 16E-07 | 1. 65E-06 |
| LRCH2    | Xq23        | -0. 383485029 | 1. 17E-07 | 1. 66E-06 |
| ZNF341   | 20q11. 22   | 0. 383426443  | 1. 17E-07 | 1. 66E-06 |
| ZNF843   | 16p11. 2    | -0. 383376227 | 1. 18E-07 | 1. 67E-06 |
| PROX1    | 1q32. 3     | -0. 383367857 | 1. 18E-07 | 1. 67E-06 |
| STK39    | 2q24. 3     | 0. 383294625  | 1. 18E-07 | 1. 68E-06 |
| ACADSB   | 10q26. 13   | -0. 383271609 | 1. 19E-07 | 1. 68E-06 |
| RIOK2    | 5q15        | -0. 38300588  | 1. 21E-07 | 1. 72E-06 |
| IKZF5    | 10q26. 13   | -0. 382959848 | 1. 22E-07 | 1. 72E-06 |
| LPCAT1   | 5p15. 33    | -0. 382610424 | 1. 25E-07 | 1. 77E-06 |
| IGFL2    | 19q13. 32   | 0. 382556823  | 1. 26E-07 | 1. 78E-06 |
| DVL1     | 1p36. 33    | 0. 382535099  | 1. 26E-07 | 1. 78E-06 |
| MDN1     | 6q15        | -0. 382474421 | 1. 27E-07 | 1. 79E-06 |
| SLC35C1  | 11p11. 2    | 0. 382417927  | 1. 27E-07 | 1. 79E-06 |
| TTC3     | 21q22. 13   | -0. 382327956 | 1. 28E-07 | 1. 81E-06 |
| GPR20    | 8q24. 3     | 0. 382300955  | 1. 28E-07 | 1. 81E-06 |
| DHX57    | 2p22. 1     | -0. 382248446 | 1. 29E-07 | 1. 81E-06 |
| ZNF280B  | 22q11. 22   | -0. 382138798 | 1. 30E-07 | 1. 83E-06 |
| ZNF527   | 19q13. 12   | -0. 381928316 | 1. 32E-07 | 1. 86E-06 |
| GSE1     | 16q24. 1    | -0. 381850899 | 1. 33E-07 | 1. 87E-06 |
| MECR     | 1p35. 3     | 0. 381848806  | 1. 33E-07 | 1. 87E-06 |
| TMEM223  | 11q12. 3    | 0. 381604001  | 1. 36E-07 | 1. 91E-06 |
| ITPKC    | 19q13. 2    | 0. 381574708  | 1. 36E-07 | 1. 91E-06 |
| SERPINB3 | 18q21. 33   | 0. 381477147  | 1. 37E-07 | 1. 92E-06 |
| FXN      | 9q21. 11    | -0. 381467997 | 1. 38E-07 | 1. 92E-06 |
| FBP1     | 9q22. 32    | 0. 381254577  | 1. 40E-07 | 1. 96E-06 |
| ESRRA    | 11q13. 1    | 0. 381231561  | 1. 40E-07 | 1. 96E-06 |
| GUCY1B2  | 13q14. 3    | 0. 381225827  | 1. 40E-07 | 1. 96E-06 |
| PNKD     | 2q35        | 0. 381162513  | 1. 41E-07 | 1. 97E-06 |
| CAST     | 5q15        | 0. 381093466  | 1. 42E-07 | 1. 98E-06 |
| RAP2A    | 13q32. 1    | -0. 381009771 | 1. 43E-07 | 1. 99E-06 |
| KMT2D    | 12q13. 12   | -0. 380974201 | 1. 43E-07 | 1. 99E-06 |
| PPL      | 16p13. 3    | 0. 380959555  | 1. 43E-07 | 1. 99E-06 |
| IL6R     | 1q21. 3     | -0. 380944908 | 1. 43E-07 | 1. 99E-06 |
| CTAGE15  | 7q35        | 0. 380854937  | 1. 45E-07 | 2. 01E-06 |
| COPS7B   | 2q37. 1     | 0. 380695918  | 1. 46E-07 | 2. 03E-06 |
| RAB20    | 13q34       | 0. 380695918  | 1. 46E-07 | 2. 03E-06 |
| ZBED3    | 5q13. 3     | -0. 380693825 | 1. 46E-07 | 2. 03E-06 |
| HCFC2    | 12q23. 3    | -0. 380685456 | 1. 47E-07 | 2. 03E-06 |
| LYRM7    | 5q23. 3-q31 | -0. 380685456 | 1. 47E-07 | 2. 03E-06 |
| SENP3    | 17p13. 1    | -0. 380645701 | 1. 47E-07 | 2. 03E-06 |
| POMP     | 13q12. 3    | 0. 380643609  | 1. 47E-07 | 2. 03E-06 |
| TCEAL1   | Xq22. 2     | -0. 380444835 | 1. 49E-07 | 2. 06E-06 |
| ZNF684   | 1p34. 2     | -0. 380398803 | 1. 50E-07 | 2. 07E-06 |
| NPAS2    | 2q11. 2     | 0. 38014772   | 1. 53E-07 | 2. 11E-06 |
| TKFC     | 11q12. 2    | 0. 380082857  | 1. 54E-07 | 2. 12E-06 |
| LAMTOR2  | 1q22        | 0. 380030548  | 1. 55E-07 | 2. 13E-06 |
| LRP12    | 8q22. 3     | -0. 379986609 | 1. 55E-07 | 2. 13E-06 |
| RAD23A   | 19p13. 13   | 0. 379984517  | 1. 55E-07 | 2. 13E-06 |
| KCNA2    | 1p13. 3     | -0. 379935491 | 1. 56E-07 | 2. 14E-06 |
| ENOX2    | Xq26. 1     | -0. 379835959 | 1. 57E-07 | 2. 16E-06 |
| BCOR     | Xp11. 4     | -0. 379760634 | 1. 58E-07 | 2. 17E-06 |

|            |           |               |           |           |
|------------|-----------|---------------|-----------|-----------|
| KLHL22     | 22q11. 21 | -0. 379743896 | 1. 58E-07 | 2. 17E-06 |
| SMAD6      | 15q22. 31 | 0. 379739711  | 1. 58E-07 | 2. 17E-06 |
| NRCAM      | 7q31. 1   | -0. 379586969 | 1. 60E-07 | 2. 19E-06 |
| RAB39B     | Xq28      | -0. 379540937 | 1. 61E-07 | 2. 2E-06  |
| ST6GALNAC1 | 1p31. 1   | -0. 379517921 | 1. 61E-07 | 2. 2E-06  |
| AP1G2      | 14q11. 2  | 0. 379513736  | 1. 61E-07 | 2. 2E-06  |
| TEAD3      | 6p21. 31  | 0. 37949072   | 1. 61E-07 | 2. 2E-06  |
| ZPR1       | 11q23. 3  | 0. 37949072   | 1. 61E-07 | 2. 2E-06  |
| MAP3K3     | 17q23. 3  | -0. 379390287 | 1. 63E-07 | 2. 22E-06 |
| PCSK7      | 11q23. 3  | 0. 379367271  | 1. 63E-07 | 2. 22E-06 |
| NSD1       | 5q35. 3   | -0. 379275208 | 1. 64E-07 | 2. 24E-06 |
| MBLAC2     | 5q14. 3   | -0. 37924173  | 1. 65E-07 | 2. 24E-06 |
| MAPK10     | 4q21. 3   | -0. 379187329 | 1. 65E-07 | 2. 25E-06 |
| CDRT1      | 17p12     | 0. 379184007  | 1. 66E-07 | 2. 25E-06 |
| PRKD2      | 19q13. 32 | 0. 379172682  | 1. 66E-07 | 2. 25E-06 |
| NIPBL      | 5p13. 2   | -0. 379164313 | 1. 66E-07 | 2. 25E-06 |
| HOMER3     | 19p13. 11 | 0. 379109911  | 1. 67E-07 | 2. 26E-06 |
| KANK1      | 9p24. 3   | -0. 379088988 | 1. 67E-07 | 2. 26E-06 |
| FERMT1     | 20p12. 3  | 0. 379065972  | 1. 67E-07 | 2. 26E-06 |
| RCAN2      | 6p12. 3   | -0. 378965539 | 1. 68E-07 | 2. 28E-06 |
| ZNF516     | 18q23     | -0. 378932061 | 1. 69E-07 | 2. 29E-06 |
| CDA        | 1p36. 12  | 0. 378925784  | 1. 69E-07 | 2. 29E-06 |
| POFUT1     | 20q11. 21 | -0. 378911138 | 1. 69E-07 | 2. 29E-06 |
| LMAN1      | 18q21. 32 | -0. 378900676 | 1. 69E-07 | 2. 29E-06 |
| ATP6V0E2-  | 7q36. 1   | -0. 378839997 | 1. 70E-07 | 2. 3E-06  |
| ESRP2      | 16q22. 1  | 0. 378729103  | 1. 72E-07 | 2. 32E-06 |
| SIRT1      | 10q21. 3  | -0. 378685163 | 1. 72E-07 | 2. 32E-06 |
| RAB36      | 22q11. 23 | -0. 378649593 | 1. 73E-07 | 2. 33E-06 |
| IL36B      | 2q14. 1   | 0. 378565293  | 1. 74E-07 | 2. 34E-06 |
| XKR4       | 8q12. 1   | -0. 378501369 | 1. 75E-07 | 2. 35E-06 |
| SFMBT2     | 10p14     | -0. 378488482 | 1. 75E-07 | 2. 35E-06 |
| RPL34-AS1  | 4q25      | -0. 378453003 | 1. 76E-07 | 2. 36E-06 |
| CYBA       | 16q24. 2  | 0. 378436173  | 1. 76E-07 | 2. 36E-06 |
| PACSIN1    | 6p21. 31  | -0. 378388048 | 1. 77E-07 | 2. 37E-06 |
| DRAIC      | 15q23     | -0. 378350782 | 1. 77E-07 | 2. 37E-06 |
| ZBTB7C     | 18q21. 1  | 0. 378268784  | 1. 78E-07 | 2. 39E-06 |
| SHARPIN    | 8q24. 3   | 0. 378254138  | 1. 78E-07 | 2. 39E-06 |
| ALPP       | 2q37. 1   | 0. 37818513   | 1. 79E-07 | 2. 4E-06  |
| ZNF106     | 15q15. 1  | -0. 378139058 | 1. 80E-07 | 2. 41E-06 |
| BCLAF1     | 6q23. 3   | -0. 378132781 | 1. 80E-07 | 2. 41E-06 |
| SIM2       | 21q22. 13 | 0. 378090934  | 1. 81E-07 | 2. 41E-06 |
| SGK3       | 8q13. 1   | -0. 378065826 | 1. 81E-07 | 2. 42E-06 |
| DIAPH1     | 5q31. 3   | 0. 37803444   | 1. 82E-07 | 2. 42E-06 |
| FOXD2      | 1p33      | 0. 377921453  | 1. 83E-07 | 2. 44E-06 |
| EXOSC7     | 3p21. 31  | 0. 377877513  | 1. 84E-07 | 2. 45E-06 |
| KISS1      | 1q32. 1   | 0. 377797772  | 1. 85E-07 | 2. 46E-06 |
| ABCD2      | 12q12     | -0. 377604658 | 1. 88E-07 | 2. 5E-06  |
| TOB1       | 17q21. 33 | 0. 37751972   | 1. 89E-07 | 2. 52E-06 |
| RP1L1      | 8p23. 1   | 0. 377509456  | 1. 89E-07 | 2. 52E-06 |
| ADAMTSL3   | 15q25. 2  | -0. 377469504 | 1. 90E-07 | 2. 52E-06 |
| CA13       | 8q21. 2   | 0. 377459042  | 1. 90E-07 | 2. 52E-06 |
| TSR1       | 17p13. 3  | -0. 377371163 | 1. 92E-07 | 2. 54E-06 |
| NMNAT3     | 3q23      | -0. 377289561 | 1. 93E-07 | 2. 55E-06 |
| CD01       | 5q22. 3   | -0. 377170297 | 1. 95E-07 | 2. 58E-06 |

|           |            |               |           |           |
|-----------|------------|---------------|-----------|-----------|
| PTPN11    | 12q24. 13  | -0. 377028017 | 1. 97E-07 | 2. 6E-06  |
| P3H2      | 3q28       | 0. 377000816  | 1. 97E-07 | 2. 61E-06 |
| ZNF583    | 19q13. 43  | -0. 376967338 | 1. 98E-07 | 2. 61E-06 |
| CALHM3    | 10q24. 33  | 0. 376915609  | 1. 99E-07 | 2. 62E-06 |
| TMEM41A   | 3q27. 2    | 0. 376915029  | 1. 99E-07 | 2. 62E-06 |
| MAFF      | 22q13. 1   | 0. 376912937  | 1. 99E-07 | 2. 62E-06 |
| BOK       | 2q37. 3    | 0. 376894106  | 1. 99E-07 | 2. 62E-06 |
| CAVIN3    | 11p15. 4   | 0. 376885736  | 1. 99E-07 | 2. 62E-06 |
| POLR3A    | 10q22. 3   | -0. 376822966 | 2. 00E-07 | 2. 63E-06 |
| KSR1      | 17q11. 2   | -0. 376818781 | 2. 00E-07 | 2. 63E-06 |
| MAP3K6    | 1p36. 11   | 0. 376653485  | 2. 03E-07 | 2. 67E-06 |
| MTURN     | 7p14. 3    | -0. 37640031  | 2. 07E-07 | 2. 72E-06 |
| SMARCAD1  | 4q22. 3    | -0. 376341724 | 2. 08E-07 | 2. 73E-06 |
| MDK       | 11p11. 2   | 0. 376140857  | 2. 11E-07 | 2. 77E-06 |
| PSMB10    | 16q22. 1   | 0. 376140857  | 2. 11E-07 | 2. 77E-06 |
| ZNF660    | 3p21. 31   | -0. 37607933  | 2. 12E-07 | 2. 78E-06 |
| LINC00909 | 18q22. 3   | -0. 375889971 | 2. 16E-07 | 2. 82E-06 |
| AQP5      | 12q13. 12  | 0. 375886376  | 2. 16E-07 | 2. 82E-06 |
| IAH1      | 2p25. 1    | 0. 375870943  | 2. 16E-07 | 2. 82E-06 |
| USP16     | 21q21. 3   | -0. 37584165  | 2. 17E-07 | 2. 83E-06 |
| WSCD1     | 17p13. 2   | -0. 37576443  | 2. 18E-07 | 2. 84E-06 |
| KIF3B     | 20q11. 21  | -0. 375737033 | 2. 18E-07 | 2. 85E-06 |
| GIT2      | 12q24. 11  | -0. 375688908 | 2. 19E-07 | 2. 86E-06 |
| MANEA     | 6q16. 1    | -0. 37562823  | 2. 20E-07 | 2. 87E-06 |
| CST1      | 20p11. 21  | 0. 375467315  | 2. 23E-07 | 2. 91E-06 |
| WDR19     | 4p14       | -0. 375428606 | 2. 24E-07 | 2. 91E-06 |
| ZNF14     | 19p13. 11  | -0. 375362501 | 2. 25E-07 | 2. 93E-06 |
| CAND1     | 12q14. 3-c | -0. 375331115 | 2. 26E-07 | 2. 93E-06 |
| NAA30     | 14q22. 3   | -0. 375255791 | 2. 27E-07 | 2. 95E-06 |
| DEDD      | 1q23. 3    | 0. 375236959  | 2. 27E-07 | 2. 95E-06 |
| FPGS      | 9q34. 11   | 0. 375211851  | 2. 28E-07 | 2. 95E-06 |
| WFDC12    | 20q13. 12  | 0. 375102391  | 2. 30E-07 | 2. 98E-06 |
| C6ORF62   | 6p22. 3    | -0. 375084217 | 2. 30E-07 | 2. 98E-06 |
| AASDHPPPT | 11q22. 3   | -0. 375075848 | 2. 30E-07 | 2. 98E-06 |
| PREPL     | 2p21       | -0. 374990061 | 2. 32E-07 | 3E-06     |
| TMC3      | 15q25. 1   | -0. 374905359 | 2. 33E-07 | 3. 02E-06 |
| ZNF671    | 19q13. 43  | -0. 374902182 | 2. 33E-07 | 3. 02E-06 |
| MMRN1     | 4q22. 1    | -0. 374874982 | 2. 34E-07 | 3. 02E-06 |
| CA5B      | Xp22. 2    | -0. 374751533 | 2. 36E-07 | 3. 05E-06 |
| FAXC      | 6q16. 2    | -0. 374743163 | 2. 36E-07 | 3. 05E-06 |
| MAP7D2    | Xp22. 12   | -0. 374705501 | 2. 37E-07 | 3. 06E-06 |
| FIGN      | 2q24. 3    | -0. 374469065 | 2. 42E-07 | 3. 11E-06 |
| EPB41L5   | 2q14. 2    | -0. 374368631 | 2. 44E-07 | 3. 13E-06 |
| MON2      | 12q14. 1   | -0. 374201243 | 2. 47E-07 | 3. 17E-06 |
| METRNL    | 17q25. 3   | 0. 374153119  | 2. 48E-07 | 3. 18E-06 |
| GJC2      | 1q42. 13   | 0. 374117549  | 2. 48E-07 | 3. 19E-06 |
| PIGB      | 15q21. 3   | 0. 373975268  | 2. 51E-07 | 3. 23E-06 |
| TBC1D3    | 17q12      | 0. 373939698  | 2. 52E-07 | 3. 23E-06 |
| IER2      | 19p13. 13  | 0. 373922959  | 2. 52E-07 | 3. 23E-06 |
| ARL8A     | 1q32. 1    | 0. 373918775  | 2. 52E-07 | 3. 23E-06 |
| SLC50A1   | 1q22       | 0. 373889482  | 2. 53E-07 | 3. 24E-06 |
| SLC1A4    | 2p14       | -0. 373862281 | 2. 54E-07 | 3. 24E-06 |
| PHACTR3   | 20q13. 32- | 0. 373854694  | 2. 54E-07 | 3. 24E-06 |
| HELZ      | 17q24. 2   | -0. 373849727 | 2. 54E-07 | 3. 24E-06 |

|           |            |               |           |           |
|-----------|------------|---------------|-----------|-----------|
| NFE2L3    | 7p15. 2    | 0. 373822526  | 2. 54E-07 | 3. 25E-06 |
| IRF3      | 19q13. 33  | 0. 373770217  | 2. 55E-07 | 3. 26E-06 |
| ZNF607    | 19q13. 12  | -0. 373686523 | 2. 57E-07 | 3. 28E-06 |
| TRIM11    | 1q42. 13   | 0. 373537966  | 2. 60E-07 | 3. 32E-06 |
| SMIM5     | 17q25. 1   | 0. 373517042  | 2. 61E-07 | 3. 32E-06 |
| C17ORF80  | 17q25. 1   | -0. 373284791 | 2. 65E-07 | 3. 38E-06 |
| CCDC61    | 19q13. 32  | 0. 373226205  | 2. 67E-07 | 3. 39E-06 |
| BCAR1     | 16q23. 1   | 0. 373152972  | 2. 68E-07 | 3. 41E-06 |
| ALKAL1    | 8q11. 23   | 0. 373116732  | 2. 69E-07 | 3. 42E-06 |
| CHMP4C    | 8q21. 13   | 0. 373054631  | 2. 70E-07 | 3. 43E-06 |
| ZDBF2     | 2q33. 3    | -0. 373012784 | 2. 71E-07 | 3. 44E-06 |
| ARMCX1    | Xq22. 1    | -0. 373006507 | 2. 71E-07 | 3. 44E-06 |
| RPS6KA1   | 1p36. 11   | 0. 372970937  | 2. 72E-07 | 3. 45E-06 |
| FAM92A    | 8q22. 1    | -0. 372870504 | 2. 74E-07 | 3. 47E-06 |
| DRD4      | 11p15. 5   | 0. 372859758  | 2. 75E-07 | 3. 47E-06 |
| ARSK      | 5q15       | -0. 372828657 | 2. 75E-07 | 3. 48E-06 |
| PLD6      | 17p11. 2   | -0. 372743065 | 2. 77E-07 | 3. 5E-06  |
| PRICKLE3  | Xp11. 23   | 0. 372719854  | 2. 78E-07 | 3. 51E-06 |
| CD36      | 7q21. 11   | -0. 37260059  | 2. 80E-07 | 3. 54E-06 |
| SMIM8     | 6q15       | -0. 372554558 | 2. 81E-07 | 3. 55E-06 |
| ZFP82     | 19q13. 12  | -0. 37249388  | 2. 83E-07 | 3. 56E-06 |
| SEPTIN9   | 17q25. 3   | 0. 372389262  | 2. 85E-07 | 3. 59E-06 |
| TTC21B    | 2q24. 3    | -0. 372370431 | 2. 85E-07 | 3. 59E-06 |
| BIN3      | 8p21. 3    | 0. 372293014  | 2. 87E-07 | 3. 61E-06 |
| AUP1      | 2p13. 1    | 0. 372290921  | 2. 87E-07 | 3. 61E-06 |
| PDCD4-AS1 | 10q25. 2   | -0. 372286737 | 2. 87E-07 | 3. 61E-06 |
| DNAJB13   | 11q13. 4   | 0. 372237421  | 2. 88E-07 | 3. 62E-06 |
| NAP1L5    | 4q22. 1 4c | -0. 372215596 | 2. 89E-07 | 3. 63E-06 |
| RTKN      | 2p13. 1    | 0. 372205135  | 2. 89E-07 | 3. 63E-06 |
| TCF3      | 19p13. 3   | 0. 372117256  | 2. 91E-07 | 3. 65E-06 |
| CDK17     | 12q23. 1   | -0. 371924759 | 2. 96E-07 | 3. 7E-06  |
| TRIOBP    | 22q13. 1   | 0. 371880819  | 2. 97E-07 | 3. 71E-06 |
| GREB1L    | 18q11. 1-c | 0. 371871136  | 2. 97E-07 | 3. 71E-06 |
| LBX2-AS1  | 2p13. 1    | 0. 371866173  | 2. 97E-07 | 3. 71E-06 |
| KRT9      | 17q21. 2   | 0. 371832463  | 2. 98E-07 | 3. 72E-06 |
| APBB1     | 11p15. 4   | -0. 371809679 | 2. 98E-07 | 3. 73E-06 |
| RAMP2-AS1 | 17q21. 2   | -0. 371719708 | 3. 00E-07 | 3. 75E-06 |
| CDK2AP2   | 11q13. 2   | 0. 371677861  | 3. 01E-07 | 3. 76E-06 |
| SLC6A14   | Xq23       | 0. 37167338   | 3. 01E-07 | 3. 76E-06 |
| WDR35     | 2p24. 1    | -0. 371644383 | 3. 02E-07 | 3. 77E-06 |
| DENND5A   | 11p15. 4   | -0. 371556504 | 3. 04E-07 | 3. 79E-06 |
| UPK3B     | 7q11. 2    | 0. 371483272  | 3. 06E-07 | 3. 81E-06 |
| KLHDC1    | 14q21. 3   | -0. 371447044 | 3. 07E-07 | 3. 82E-06 |
| ALPG      | 2q37. 1    | 0. 371402056  | 3. 08E-07 | 3. 83E-06 |
| PTPRU     | 1p35. 3    | 0. 371257297  | 3. 12E-07 | 3. 87E-06 |
| FBXO5     | 6q25. 2    | -0. 371194526 | 3. 13E-07 | 3. 89E-06 |
| COPS4     | 4q21. 22   | -0. 371190342 | 3. 13E-07 | 3. 89E-06 |
| PGAP1     | 2q33. 1    | -0. 371138033 | 3. 14E-07 | 3. 9E-06  |
| ORAI3     | 16p11. 2   | 0. 371043877  | 3. 17E-07 | 3. 93E-06 |
| SNX13     | 7p21. 1    | -0. 371014584 | 3. 18E-07 | 3. 93E-06 |
| SEMA5A    | 5p15. 31   | -0. 370895319 | 3. 21E-07 | 3. 97E-06 |
| RPRD1A    | 18q12. 2   | -0. 370826272 | 3. 22E-07 | 3. 99E-06 |
| HSPA13    | 21q11. 2   | -0. 370799071 | 3. 23E-07 | 3. 99E-06 |
| POU2F3    | 11q23. 3   | 0. 370676862  | 3. 26E-07 | 4. 03E-06 |

|           |          |              |          |          |
|-----------|----------|--------------|----------|----------|
| GIMAP6    | 7q36.1   | -0.370612851 | 3.28E-07 | 4.05E-06 |
| HIST1H2BE | 6p22.2   | 0.37048731   | 3.31E-07 | 4.08E-06 |
| NKIRAS2   | 17q21.2  | 0.370435001  | 3.32E-07 | 4.1E-06  |
| NSL1      | 1q32.3   | -0.370330383 | 3.35E-07 | 4.13E-06 |
| TBC1D2    | 9q22.33  | 0.370236227  | 3.38E-07 | 4.16E-06 |
| PCSK1     | 5q15     | -0.370160902 | 3.40E-07 | 4.18E-06 |
| MACC1     | 7p21.1   | 0.370121147  | 3.41E-07 | 4.19E-06 |
| FLCN      | 17p11.2  | -0.370022807 | 3.43E-07 | 4.22E-06 |
| MUC17     | 7q22.1   | 0.370007025  | 3.44E-07 | 4.22E-06 |
| CCDC62    | 12q24.31 | -0.369993514 | 3.44E-07 | 4.22E-06 |
| AOX1      | 2q33.1   | -0.36998096  | 3.44E-07 | 4.23E-06 |
| TTL       | 2q14.1   | -0.369861695 | 3.48E-07 | 4.26E-06 |
| ARPC1A    | 7q22.1   | 0.36979474   | 3.49E-07 | 4.28E-06 |
| GOLPH3    | 5p13.3   | -0.369600151 | 3.55E-07 | 4.35E-06 |
| NR2C2AP   | 19p13.11 | 0.369539472  | 3.57E-07 | 4.36E-06 |
| ITPR3     | 6p21.31  | 0.369531103  | 3.57E-07 | 4.36E-06 |
| MCU       | 10q22.1  | 0.369342791  | 3.62E-07 | 4.42E-06 |
| DLC1      | 8p22     | -0.369338606 | 3.62E-07 | 4.42E-06 |
| MBOAT1    | 6p22.3   | 0.369336514  | 3.62E-07 | 4.42E-06 |
| TTLL7     | 1p31.1   | -0.369328144 | 3.62E-07 | 4.42E-06 |
| ZNF546    | 19q13.2  | -0.369257004 | 3.64E-07 | 4.44E-06 |
| PCMT1     | 6q25.1   | -0.369223526 | 3.65E-07 | 4.45E-06 |
| KREMEN1   | 22q12.1  | -0.369202603 | 3.66E-07 | 4.46E-06 |
| SH2B3     | 12q24.12 | -0.369033122 | 3.71E-07 | 4.51E-06 |
| WDR78     | 1p31.3   | -0.368932689 | 3.74E-07 | 4.54E-06 |
| SH3GL1    | 19p13.3  | 0.368932689  | 3.74E-07 | 4.54E-06 |
| ELOVL2    | 6p24.2   | -0.368805055 | 3.78E-07 | 4.59E-06 |
| IRF9      | 14q12    | 0.36880087   | 3.78E-07 | 4.59E-06 |
| ACTG1     | 17q25.3  | 0.36877367   | 3.78E-07 | 4.59E-06 |
| CRKL      | 22q11.21 | -0.368669052 | 3.82E-07 | 4.63E-06 |
| CEP68     | 2p14     | -0.368612558 | 3.83E-07 | 4.64E-06 |
| CXCL17    | 19q13.2  | 0.368608374  | 3.83E-07 | 4.64E-06 |
| TYW3      | 1p31.1   | -0.368604189 | 3.84E-07 | 4.64E-06 |
| ZFP14     | 19q13.12 | -0.368596012 | 3.84E-07 | 4.64E-06 |
| DCTN4     | 5q33.1   | -0.368576988 | 3.84E-07 | 4.65E-06 |
| DGUOK     | 2p13.1   | 0.368524679  | 3.86E-07 | 4.66E-06 |
| MSMP      | 9p13.3   | -0.368484925 | 3.87E-07 | 4.68E-06 |
| TDRD6     | 6p12.3   | -0.36847237  | 3.87E-07 | 4.68E-06 |
| C18ORF25  | 18q21.1  | -0.368420062 | 3.89E-07 | 4.69E-06 |
| GRAP2     | 22q13.1  | -0.368403323 | 3.90E-07 | 4.7E-06  |
| PRR13     | 12q13.13 | 0.368397046  | 3.90E-07 | 4.7E-06  |
| PALM2     | 9q31.3   | -0.368334275 | 3.92E-07 | 4.72E-06 |
| BFAR      | 16p13.12 | 0.368277781  | 3.93E-07 | 4.73E-06 |
| RHOBTB3   | 5q15     | -0.368267319 | 3.94E-07 | 4.74E-06 |
| DPY19L3   | 19q13.11 | -0.368254765 | 3.94E-07 | 4.74E-06 |
| MTFP1     | 22q12.2  | 0.368171071  | 3.97E-07 | 4.77E-06 |
| NFYB      | 12q23.3  | -0.368106208 | 3.99E-07 | 4.79E-06 |
| SNAPC2    | 19p13.2  | 0.368007867  | 4.02E-07 | 4.82E-06 |
| EML6      | 2p16.1   | -0.36796602  | 4.03E-07 | 4.83E-06 |
| H2AFV     | 7p13     | -0.367915804 | 4.05E-07 | 4.85E-06 |
| BMP6      | 6p24.3   | -0.367786077 | 4.09E-07 | 4.9E-06  |
| ABL1      | 9q34.12  | -0.3677526   | 4.10E-07 | 4.91E-06 |
| ZNF420    | 19q13.12 | -0.367727491 | 4.11E-07 | 4.91E-06 |
| TRAM2     | 6p12.2   | -0.367723307 | 4.11E-07 | 4.91E-06 |

|           |            |              |          |          |
|-----------|------------|--------------|----------|----------|
| LINC00476 | 9q22. 32   | -0.367587304 | 4.15E-07 | 4.96E-06 |
| FAM160B1  | 10q25. 3   | -0.367543364 | 4.17E-07 | 4.97E-06 |
| KRT79     | 12q13. 13  | 0.367499872  | 4.18E-07 | 4.99E-06 |
| MYEF2     | 15q21. 1   | -0.367488963 | 4.18E-07 | 4.99E-06 |
| TM4SF18   | 3q25. 1    | -0.367470132 | 4.19E-07 | 4.99E-06 |
| DNAJB1    | 19p13. 12  | 0.367470132  | 4.19E-07 | 4.99E-06 |
| AGMO      | 7p21. 2    | 0.36744951   | 4.20E-07 | 5E-06    |
| SPX       | 12p12. 1   | -0.367365174 | 4.22E-07 | 5.02E-06 |
| BNIP3     | 10q26. 3   | -0.367361329 | 4.23E-07 | 5.02E-06 |
| ZFPL1     | 11q13. 1   | 0.367189756  | 4.28E-07 | 5.09E-06 |
| NADK2     | 5p13. 2    | -0.367177202 | 4.29E-07 | 5.09E-06 |
| ZNF624    | 17p11. 2   | -0.367141632 | 4.30E-07 | 5.1E-06  |
| VLDLR-AS1 | 19p24. 2   | -0.366838345 | 4.40E-07 | 5.22E-06 |
| THAP2     | 12q21. 1   | -0.366823593 | 4.41E-07 | 5.22E-06 |
| CPTP      | 1p36. 33   | 0.3667943    | 4.42E-07 | 5.23E-06 |
| PAPOLA    | 14q32. 2   | -0.366746176 | 4.43E-07 | 5.25E-06 |
| WFDC3     | 20q13. 12  | 0.366727537  | 4.44E-07 | 5.25E-06 |
| ZC3H6     | 2q14. 1    | -0.366679221 | 4.45E-07 | 5.27E-06 |
| PHIP      | 6q14. 1    | -0.366641558 | 4.47E-07 | 5.28E-06 |
| ZSCAN30   | 18q12. 2   | -0.366585065 | 4.49E-07 | 5.3E-06  |
| RNF181    | 2p11. 2    | 0.366551587  | 4.50E-07 | 5.31E-06 |
| TADA2B    | 4p16. 1    | -0.366518109 | 4.51E-07 | 5.32E-06 |
| ACTR3B    | 7q36. 1-q5 | -0.366513925 | 4.51E-07 | 5.32E-06 |
| CCND1     | 11q13. 3   | 0.366469985  | 4.53E-07 | 5.34E-06 |
| CBFA2T3   | 16q24. 3   | -0.366442785 | 4.54E-07 | 5.34E-06 |
| LINC00628 | 1q32. 1    | 0.366418423  | 4.55E-07 | 5.35E-06 |
| ZFR       | 5p13. 3    | -0.366352813 | 4.57E-07 | 5.37E-06 |
| MAP2      | 2q34       | -0.366329797 | 4.58E-07 | 5.38E-06 |
| RIMBP3C   | 22q11. 21  | -0.366316036 | 4.58E-07 | 5.38E-06 |
| RORA      | 15q22. 2   | -0.36625238  | 4.60E-07 | 5.41E-06 |
| PDCL      | 9q33. 2    | -0.366185425 | 4.63E-07 | 5.43E-06 |
| CYP27C1   | 2q14. 3    | 0.366135974  | 4.65E-07 | 5.45E-06 |
| NTSR1     | 20q13. 33  | 0.366084992  | 4.66E-07 | 5.47E-06 |
| AP2B1     | 17q12      | 0.365978281  | 4.70E-07 | 5.51E-06 |
| TES       | 7q31. 2    | 0.365909234  | 4.73E-07 | 5.54E-06 |
| R3HDM4    | 19p13. 3   | 0.365840186  | 4.75E-07 | 5.56E-06 |
| TNRC6C    | 17q25. 3   | -0.365840186 | 4.75E-07 | 5.56E-06 |
| ITM2A     | Xq21. 1    | -0.365783692 | 4.77E-07 | 5.58E-06 |
| FAM214A   | 15q21. 2-c | -0.365756492 | 4.78E-07 | 5.59E-06 |
| PRKCZ     | 1p36. 33   | 0.365729291  | 4.79E-07 | 5.6E-06  |
| TCEANC    | Xp22. 2    | -0.365695813 | 4.81E-07 | 5.61E-06 |
| ZNF74     | 22q11. 21  | -0.365434269 | 4.91E-07 | 5.72E-06 |
| FAM216A   | 12q24. 11  | -0.365402883 | 4.92E-07 | 5.73E-06 |
| CAPS      | 19p13. 3   | 0.365329651  | 4.94E-07 | 5.76E-06 |
| HMCES     | 3q21. 3    | 0.365233402  | 4.98E-07 | 5.8E-06  |
| ANXA6     | 5q33. 1    | -0.365172724 | 5.01E-07 | 5.82E-06 |
| VPS53     | 17p13. 3   | -0.36516017  | 5.01E-07 | 5.83E-06 |
| RNGTT     | 6q15       | -0.365137154 | 5.02E-07 | 5.83E-06 |
| SSX2IP    | 1p22. 3    | -0.365040906 | 5.06E-07 | 5.87E-06 |
| SCAF8     | 6q25. 2    | -0.364992781 | 5.07E-07 | 5.89E-06 |
| NUTF2     | 16q22. 1   | 0.364986504  | 5.08E-07 | 5.89E-06 |
| TNRC6B    | 22q13. 1   | -0.364965581 | 5.09E-07 | 5.9E-06  |
| LGALS4    | 19q13. 2   | 0.364917457  | 5.10E-07 | 5.91E-06 |
| ZBTB21    | 21q22. 3   | -0.364906995 | 5.11E-07 | 5.92E-06 |



|            |           |              |          |          |
|------------|-----------|--------------|----------|----------|
| ADGRF5     | 6p12.3    | -0.364840039 | 5.14E-07 | 5.94E-06 |
| RIMBP3     | 22q11.21  | -0.364757582 | 5.17E-07 | 5.98E-06 |
| PLAT       | 8p11.21   | 0.364699851  | 5.19E-07 | 6E-06    |
| IDH3A      | 15q25.1   | -0.364649635 | 5.21E-07 | 6.02E-06 |
| TPH1       | 11p15.1   | -0.36461316  | 5.23E-07 | 6.03E-06 |
| C14ORF132  | 14q32.2   | -0.364578495 | 5.24E-07 | 6.05E-06 |
| AMD1       | 6q21      | -0.364513632 | 5.27E-07 | 6.07E-06 |
| MATR3      | 5q31.2    | -0.36442366  | 5.30E-07 | 6.11E-06 |
| FOXH1      | 8q24.3    | 0.364419666  | 5.30E-07 | 6.11E-06 |
| ARHGAP19   | 10q24.1   | -0.364329504 | 5.34E-07 | 6.15E-06 |
| NCAM1      | 11q23.2   | -0.364249995 | 5.37E-07 | 6.18E-06 |
| SNX7       | 1p21.3    | 0.364247902  | 5.37E-07 | 6.18E-06 |
| SUMO1      | 2q33.1    | 0.364239533  | 5.38E-07 | 6.18E-06 |
| MXD1       | 2p13.3    | 0.364170485  | 5.41E-07 | 6.21E-06 |
| IRX5       | 16q12.2   | 0.364124453  | 5.43E-07 | 6.23E-06 |
| FOXN3      | 14q31.3-c | -0.36405959  | 5.45E-07 | 6.26E-06 |
| PPP4R4     | 14q32.12- | -0.364038479 | 5.46E-07 | 6.26E-06 |
| F11R       | 1q23.3    | 0.363963342  | 5.49E-07 | 6.3E-06  |
| C2CD5      | 12p12.1   | -0.363944511 | 5.50E-07 | 6.3E-06  |
| VASH1      | 14q24.3   | -0.363827339 | 5.55E-07 | 6.35E-06 |
| PBX4       | 19p13.11  | 0.363818969  | 5.55E-07 | 6.35E-06 |
| ABCC4      | 13q32.1   | -0.363804323 | 5.56E-07 | 6.36E-06 |
| SLC52A2    | 8q24.3    | 0.363758291  | 5.58E-07 | 6.38E-06 |
| FAM53C     | 5q31.2    | -0.363733183 | 5.59E-07 | 6.39E-06 |
| ADIRF      | 10q23.2   | 0.363592995  | 5.65E-07 | 6.45E-06 |
| PEX11B     | 1q21.1    | 0.363377482  | 5.75E-07 | 6.55E-06 |
| TUB        | 11p15.4   | -0.36330425  | 5.78E-07 | 6.59E-06 |
| KLKP1      | 19q13.33  | 0.363079704  | 5.88E-07 | 6.7E-06  |
| AK9        | 6q21      | -0.363053167 | 5.89E-07 | 6.71E-06 |
| PNPLA2     | 11p15.5   | 0.36303852   | 5.90E-07 | 6.71E-06 |
| TAB3       | Xp21.2    | -0.363032243 | 5.90E-07 | 6.71E-06 |
| TMEM189    | 20q13.13  | 0.363030151  | 5.90E-07 | 6.71E-06 |
| CDK7       | 5q13.2    | 0.363015504  | 5.91E-07 | 6.71E-06 |
| GCH1       | 14q22.2   | -0.362935995 | 5.94E-07 | 6.75E-06 |
| HOOK1      | 1p32.1    | -0.36293181  | 5.95E-07 | 6.75E-06 |
| MITD1      | 2q11.2    | 0.362921348  | 5.95E-07 | 6.75E-06 |
| PDPK1      | 16p13.3   | -0.36268282  | 6.06E-07 | 6.87E-06 |
| GALNT11    | 7q36.1 7c | -0.362620049 | 6.09E-07 | 6.9E-06  |
| ZSCAN26    | 6p22.1    | -0.36261168  | 6.09E-07 | 6.9E-06  |
| RETSAT     | 2p11.2    | 0.362534262  | 6.13E-07 | 6.94E-06 |
| CYP2C19    | 10q23.33  | 0.362317114  | 6.23E-07 | 7.05E-06 |
| SLC13A5    | 17p13.1   | 0.362293641  | 6.24E-07 | 7.06E-06 |
| EIF4EBP3   | 5q31.3    | 0.362281087  | 6.25E-07 | 7.06E-06 |
| DOCK4      | 7q31.1    | -0.362237148 | 6.27E-07 | 7.08E-06 |
| CA9        | 9p13.3    | 0.362161823  | 6.31E-07 | 7.12E-06 |
| ZSCAN5A    | 19q13.43  | -0.362042559 | 6.36E-07 | 7.18E-06 |
| LARP4      | 12q13.12  | -0.362032097 | 6.37E-07 | 7.18E-06 |
| PALM2-AKA1 | 9q31.3    | -0.362032097 | 6.37E-07 | 7.18E-06 |
| MRO        | 18q21.2   | -0.361983973 | 6.39E-07 | 7.2E-06  |
| RBP3       | 10q11.22  | 0.361918353  | 6.42E-07 | 7.23E-06 |
| INPP1      | 2q32.2    | 0.361827046  | 6.47E-07 | 7.27E-06 |
| AGR2       | 7p21.1    | 0.361818866  | 6.47E-07 | 7.27E-06 |
| AGR3       | 7p21.1    | 0.361815249  | 6.47E-07 | 7.27E-06 |
| DYRK3      | 1q32.1    | -0.361779111 | 6.49E-07 | 7.29E-06 |

|           |           |              |          |          |
|-----------|-----------|--------------|----------|----------|
| EDA       | Xq13.1    | -0.361774737 | 6.49E-07 | 7.29E-06 |
| TMEM70    | 8q21.11   | -0.361766367 | 6.50E-07 | 7.29E-06 |
| ATIC      | 2q35      | 0.361695227  | 6.53E-07 | 7.32E-06 |
| HEBP2     | 6q24.1    | 0.361645011  | 6.56E-07 | 7.35E-06 |
| UBE2O     | 17q25.1   | -0.361613625 | 6.58E-07 | 7.36E-06 |
| DZIP3     | 3q13.13   | -0.361598979 | 6.58E-07 | 7.37E-06 |
| PAK3      | Xq23      | -0.361552947 | 6.61E-07 | 7.39E-06 |
| FOXP2     | 7q31.1    | -0.361538301 | 6.61E-07 | 7.39E-06 |
| PLP2      | Xp11.23   | 0.361538301  | 6.61E-07 | 7.39E-06 |
| ZFP30     | 19q13.12  | -0.361500638 | 6.63E-07 | 7.41E-06 |
| ENDOD1    | 11q21     | 0.361462976  | 6.65E-07 | 7.42E-06 |
| OXSR1     | 3p22.2    | 0.361452514  | 6.66E-07 | 7.42E-06 |
| F12       | 5q35.3    | 0.361435775  | 6.66E-07 | 7.43E-06 |
| TACC1     | 8p11.22   | -0.361419036 | 6.67E-07 | 7.43E-06 |
| MPG       | 16p13.3   | 0.361416944  | 6.67E-07 | 7.43E-06 |
| AAMP      | 2q35      | 0.361414852  | 6.68E-07 | 7.43E-06 |
| RAPGEF6   | 5q31.1    | -0.361387651 | 6.69E-07 | 7.44E-06 |
| KAT2B     | 3p24.3    | -0.361366727 | 6.70E-07 | 7.45E-06 |
| LRP6      | 12p13.2   | -0.361295587 | 6.74E-07 | 7.48E-06 |
| NIPSNAP3E | 9q31.1    | -0.361285125 | 6.74E-07 | 7.49E-06 |
| STX2      | 12q24.33  | -0.361268387 | 6.75E-07 | 7.49E-06 |
| CXCL12    | 10q11.21  | -0.361163769 | 6.80E-07 | 7.55E-06 |
| CARS2     | 13q34     | 0.36106752   | 6.85E-07 | 7.6E-06  |
| DMD       | Xp21.2-p2 | -0.360981734 | 6.90E-07 | 7.64E-06 |
| GRID2IP   | 7p22.1    | 0.360856192  | 6.97E-07 | 7.71E-06 |
| MIR31HG   | 9p21.3    | 0.360762791  | 7.01E-07 | 7.76E-06 |
| FBXW2     | 9q33.2    | -0.360713912 | 7.04E-07 | 7.79E-06 |
| HRH1      | 3p25.3    | 0.360674157  | 7.06E-07 | 7.81E-06 |
| TDP2      | 6p22.3    | -0.360519323 | 7.15E-07 | 7.89E-06 |
| ZNF441    | 19p13.2   | -0.360515138 | 7.15E-07 | 7.89E-06 |
| HIST1H2AM | 6p22.1    | 0.360487813  | 7.16E-07 | 7.91E-06 |
| DCST2     | 1q21.3    | 0.360436863  | 7.19E-07 | 7.93E-06 |
| SLC11A2   | 12q13.12  | -0.360362396 | 7.23E-07 | 7.97E-06 |
| PADI3     | 1p36.13   | 0.360303218  | 7.26E-07 | 8E-06    |
| CERKL     | 2q31.3    | -0.360182453 | 7.33E-07 | 8.07E-06 |
| DOCK10    | 2q36.2    | -0.360159438 | 7.34E-07 | 8.08E-06 |
| NBEAL2    | 3p21.31   | 0.360033896  | 7.41E-07 | 8.16E-06 |
| FBXL6     | 8q24.3    | 0.360023434  | 7.42E-07 | 8.16E-06 |
| CEBPB     | 20q13.13  | 0.360002511  | 7.43E-07 | 8.16E-06 |
| STARD13   | 13q13.1-c | -0.360000418 | 7.43E-07 | 8.16E-06 |
| KRT6C     | 12q13.13  | 0.35997372   | 7.45E-07 | 8.17E-06 |
| POLR3F    | 20p11.23  | -0.359966941 | 7.45E-07 | 8.17E-06 |
| USF1      | 1q23.3    | 0.359946017  | 7.46E-07 | 8.18E-06 |
| RGS22     | 8q22.2    | -0.359873538 | 7.50E-07 | 8.22E-06 |
| C19ORF54  | 19q13.2   | 0.359812106  | 7.54E-07 | 8.26E-06 |
| RASA3     | 13q34     | 0.359795368  | 7.55E-07 | 8.26E-06 |
| SMC1A     | Xp11.22   | -0.359791183 | 7.55E-07 | 8.26E-06 |
| MOGAT3    | 7q22.1    | 0.359769327  | 7.56E-07 | 8.26E-06 |
| ATP2B1-AS | 12q21.33  | -0.359766075 | 7.57E-07 | 8.26E-06 |
| ARPC5     | 1q25.3    | 0.359757705  | 7.57E-07 | 8.26E-06 |
| VSTM2L    | 20q11.23  | 0.359755613  | 7.57E-07 | 8.26E-06 |
| UBR3      | 2q31.1    | -0.359755613 | 7.57E-07 | 8.26E-06 |
| HIST1H1C  | 6p22.2    | 0.359667734  | 7.62E-07 | 8.31E-06 |
| UBE2E3    | 2q31.3    | 0.359632164  | 7.64E-07 | 8.33E-06 |

|            |            |               |           |           |
|------------|------------|---------------|-----------|-----------|
| PGBD5      | 1q42. 13   | -0. 359550562 | 7. 69E-07 | 8. 38E-06 |
| COL7A1     | 3p21. 31   | 0. 359481514  | 7. 73E-07 | 8. 42E-06 |
| PLAAT1     | 3q29       | -0. 359471992 | 7. 74E-07 | 8. 42E-06 |
| APC        | 5q22. 2    | -0. 359466868 | 7. 74E-07 | 8. 42E-06 |
| MPP6       | 7p15. 3    | -0. 359456406 | 7. 75E-07 | 8. 42E-06 |
| WDFY2      | 13q14. 3   | -0. 359429205 | 7. 76E-07 | 8. 43E-06 |
| ACSF2      | 17q21. 33  | 0. 359383173  | 7. 79E-07 | 8. 46E-06 |
| SEMA3G     | 3p21. 1    | -0. 359349696 | 7. 81E-07 | 8. 47E-06 |
| DNAJB3     | 2q37. 1    | 0. 359322218  | 7. 82E-07 | 8. 49E-06 |
| ANKRD7     | 7q31. 31   | -0. 359265325 | 7. 86E-07 | 8. 52E-06 |
| BVES       | 6q21       | -0. 359150922 | 7. 93E-07 | 8. 59E-06 |
| ZBTB4      | 17p13. 1   | -0. 359127906 | 7. 94E-07 | 8. 6E-06  |
| PHEX       | Xp22. 11   | -0. 358972101 | 8. 03E-07 | 8. 69E-06 |
| RUNDC3B    | 7q21. 12   | -0. 358931224 | 8. 06E-07 | 8. 72E-06 |
| FILIP1     | 6q14. 1    | -0. 358904024 | 8. 08E-07 | 8. 73E-06 |
| CSN1S1     | 4q13. 3    | -0. 358821556 | 8. 13E-07 | 8. 78E-06 |
| ST6GALNAC1 | 1p31. 1    | -0. 358814052 | 8. 13E-07 | 8. 78E-06 |
| NHSL2      | Xq13. 1    | -0. 358763836 | 8. 16E-07 | 8. 81E-06 |
| BID        | 22q11. 21  | 0. 358644571  | 8. 23E-07 | 8. 88E-06 |
| SLAMF9     | 1q23. 2    | 0. 358639045  | 8. 24E-07 | 8. 88E-06 |
| ELOA       | 1p36. 11   | -0. 358623648 | 8. 25E-07 | 8. 88E-06 |
| DKK4       | 8p11. 21   | 0. 358623226  | 8. 25E-07 | 8. 88E-06 |
| CDC42EP2   | 11q13. 1   | 0. 358596447  | 8. 26E-07 | 8. 9E-06  |
| TNFAIP2    | 14q32. 32  | 0. 358575524  | 8. 28E-07 | 8. 9E-06  |
| MOCS1      | 6p21. 2    | -0. 358512753 | 8. 32E-07 | 8. 94E-06 |
| ELP2       | 18q12. 2   | -0. 358504383 | 8. 32E-07 | 8. 94E-06 |
| CARD19     | 9q22. 31   | 0. 358491829  | 8. 33E-07 | 8. 94E-06 |
| TSG101     | 11p15. 1   | 0. 358487645  | 8. 33E-07 | 8. 94E-06 |
| PDK4       | 7q21. 3    | -0. 358477183 | 8. 34E-07 | 8. 95E-06 |
| TGM5       | 15q15. 2   | 0. 358460576  | 8. 35E-07 | 8. 95E-06 |
| IFI44      | 1p31. 1    | 0. 358418597  | 8. 38E-07 | 8. 98E-06 |
| LMO4       | 1p22. 3    | 0. 35841232   | 8. 38E-07 | 8. 98E-06 |
| RNF182     | 6p23       | -0. 35830561  | 8. 45E-07 | 9. 04E-06 |
| DNAH2      | 17p13. 1   | 0. 358077543  | 8. 59E-07 | 9. 2E-06  |
| RNF135     | 17q11. 2   | 0. 358064989  | 8. 60E-07 | 9. 2E-06  |
| ITPA       | 20p13      | 0. 358060804  | 8. 61E-07 | 9. 2E-06  |
| CEP162     | 6q14. 2-q1 | -0. 358054527 | 8. 61E-07 | 9. 2E-06  |
| SLC2A13    | 12q12      | -0. 358027326 | 8. 63E-07 | 9. 21E-06 |
| CYLD       | 16q12. 1   | -0. 357920616 | 8. 70E-07 | 9. 28E-06 |
| ZC3H7A     | 16p13. 13  | -0. 35771138  | 8. 83E-07 | 9. 42E-06 |
| TALD01     | 11p15. 5   | 0. 357707196  | 8. 84E-07 | 9. 42E-06 |
| NMB        | 15q25. 2   | 0. 357700919  | 8. 84E-07 | 9. 42E-06 |
| PRICKLE2   | 3p14. 1    | -0. 357659071 | 8. 87E-07 | 9. 44E-06 |
| APPBP2     | 17q23. 2   | -0. 357610947 | 8. 90E-07 | 9. 47E-06 |
| TTC9       | 14q24. 2   | 0. 357585839  | 8. 92E-07 | 9. 49E-06 |
| BRMS1L     | 14q13. 2   | -0. 357571192 | 8. 93E-07 | 9. 49E-06 |
| MSM01      | 4q32. 3    | 0. 357491683  | 8. 98E-07 | 9. 54E-06 |
| YEATS4     | 12q15      | -0. 357487498 | 8. 98E-07 | 9. 54E-06 |
| NF2        | 22q12. 2   | -0. 357460298 | 9. 00E-07 | 9. 56E-06 |
| TIGD7      | 16p13. 3   | -0. 35741845  | 9. 03E-07 | 9. 58E-06 |
| FUT6       | 19p13. 3   | 0. 357409222  | 9. 04E-07 | 9. 58E-06 |
| TRNP1      | 1p36. 11   | 0. 357407989  | 9. 04E-07 | 9. 58E-06 |
| CHMP2B     | 3p11. 2    | 0. 357328479  | 9. 09E-07 | 9. 63E-06 |
| RUSC1      | 1q22       | 0. 357278263  | 9. 13E-07 | 9. 66E-06 |

|           |          |              |          |          |
|-----------|----------|--------------|----------|----------|
| PRKCI     | 3q26.2   | 0.357196661  | 9.18E-07 | 9.71E-06 |
| JOSD2     | 19q13.33 | 0.357190384  | 9.19E-07 | 9.71E-06 |
| YOD1      | 1q32.1   | 0.357186199  | 9.19E-07 | 9.71E-06 |
| AFAP1-AS1 | 4p16.1   | 0.357046011  | 9.29E-07 | 9.81E-06 |
| GIMAP8    | 7q36.1   | -0.356974871 | 9.34E-07 | 9.86E-06 |
| FBXL5     | 4p15.32  | -0.356941393 | 9.36E-07 | 9.88E-06 |
| SCAPER    | 15q24.3  | -0.356914192 | 9.38E-07 | 9.89E-06 |
| VPS37B    | 12q24.31 | 0.356886992  | 9.40E-07 | 9.91E-06 |
| SSH2      | 17q11.2  | -0.356803298 | 9.46E-07 | 9.96E-06 |
| CD200     | 3q13.2   | -0.356774005 | 9.48E-07 | 9.98E-06 |
| GNRH1     | 8p21.2   | 0.356757266  | 9.49E-07 | 9.99E-06 |
| NLGN1     | 3q26.31  | -0.356661017 | 9.56E-07 | 1.01E-05 |
| KLK8      | 19q13.41 | 0.356639051  | 9.57E-07 | 1.01E-05 |
| COG4      | 16q22.1  | 0.356543845  | 9.64E-07 | 1.01E-05 |
| PRIMPOL   | 4q35.1   | -0.356516645 | 9.66E-07 | 1.01E-05 |
| PEG3      | 19q13.43 | -0.356510368 | 9.67E-07 | 1.01E-05 |
| TMEM141   | 9q34.3   | 0.356418304  | 9.73E-07 | 1.02E-05 |
| ACAA1     | 3p22.2   | 0.356382734  | 9.76E-07 | 1.02E-05 |
| SLC9A1    | 1p36.11  | 0.356365995  | 9.77E-07 | 1.02E-05 |
| RRP9      | 3p21.2   | 0.356311594  | 9.81E-07 | 1.03E-05 |
| FHL1      | Xq26.3   | -0.356282301 | 9.83E-07 | 1.03E-05 |
| SP6       | 17q21.32 | 0.356273931  | 9.84E-07 | 1.03E-05 |
| ANO9      | 11p15.5  | 0.356240454  | 9.86E-07 | 1.03E-05 |
| AP1S2     | Xp22.2   | -0.356236269 | 9.87E-07 | 1.03E-05 |
| ANKMY1    | 2q37.3   | 0.356190237  | 9.90E-07 | 1.03E-05 |
| TBC1D13   | 9q34.11  | -0.356102358 | 9.97E-07 | 1.04E-05 |
| ZNF331    | 19q13.42 | -0.356093989 | 9.97E-07 | 1.04E-05 |
| FGF7P3    | 9p12     | -0.356012387 | 1E-06    | 1.05E-05 |
| NBPF1     | 1p36.13  | -0.356001925 | 1E-06    | 1.05E-05 |
| PITPNM1   | 11q13.2  | 0.35599774   | 1E-06    | 1.05E-05 |
| PTMA      | 2q37.1   | 0.355941247  | 1.01E-06 | 1.05E-05 |
| BEX4      | Xq22.1   | -0.355916138 | 1.01E-06 | 1.05E-05 |
| RPL7L1    | 6p21.1   | -0.355857552 | 1.02E-06 | 1.06E-05 |
| NUDT9P1   | 10q23.32 | -0.355811777 | 1.02E-06 | 1.06E-05 |
| EXOC1     | 4q12     | 0.355809428  | 1.02E-06 | 1.06E-05 |
| XAF1      | 17p13.1  | 0.355803151  | 1.02E-06 | 1.06E-05 |
| NCOA1     | 2p23.3   | -0.355738288 | 1.02E-06 | 1.06E-05 |
| PLA2G4D   | 15q15.1  | 0.355631934  | 1.03E-06 | 1.07E-05 |
| AKR1B10   | 7q33     | 0.355570039  | 1.04E-06 | 1.08E-05 |
| PI3       | 20q13.12 | 0.355555579  | 1.04E-06 | 1.08E-05 |
| BRSK2     | 11p15.5  | -0.355497667 | 1.04E-06 | 1.08E-05 |
| TSTA3     | 8q24.3   | 0.355485113  | 1.04E-06 | 1.08E-05 |
| PYGB      | 20p11.21 | 0.355457912  | 1.05E-06 | 1.08E-05 |
| ARID1A    | 1p36.11  | -0.355342833 | 1.05E-06 | 1.09E-05 |
| SLC25A5   | Xq24     | -0.355261231 | 1.06E-06 | 1.1E-05  |
| TNIP2     | 4p16.3   | 0.355171259  | 1.07E-06 | 1.1E-05  |
| ZYX       | 7q34     | 0.355077103  | 1.08E-06 | 1.11E-05 |
| GATAD2A   | 19p13.11 | 0.354970393  | 1.08E-06 | 1.12E-05 |
| COA4      | 11q13.4  | 0.354966208  | 1.08E-06 | 1.12E-05 |
| HBS1L     | 6q23.3   | -0.354953654 | 1.09E-06 | 1.12E-05 |
| CD82      | 11p11.2  | 0.354920177  | 1.09E-06 | 1.12E-05 |
| CD300LG   | 17q21.31 | -0.354904807 | 1.09E-06 | 1.12E-05 |
| DIO3OS    | 14q32.31 | 0.354902966  | 1.09E-06 | 1.12E-05 |
| LOC100130 | 4p16.3   | 0.354865775  | 1.09E-06 | 1.13E-05 |

|           |           |              |          |          |
|-----------|-----------|--------------|----------|----------|
| NUDT8     | 11q13.2   | 0.354813466  | 1.1E-06  | 1.13E-05 |
| THTPA     | 14q11.2   | -0.354805097 | 1.1E-06  | 1.13E-05 |
| COMT      | 22q11.21  | 0.35479882   | 1.1E-06  | 1.13E-05 |
| ANKS1B    | 12q23.1   | -0.354769898 | 1.1E-06  | 1.13E-05 |
| NEURL4    | 17p13.1   | -0.354671186 | 1.11E-06 | 1.14E-05 |
| KDM2B     | 12q24.31  | -0.354658632 | 1.11E-06 | 1.14E-05 |
| NPY4R     | 10q11.22  | 0.354630957  | 1.11E-06 | 1.14E-05 |
| FAM234B   | 12p13.1   | -0.354581215 | 1.12E-06 | 1.14E-05 |
| SOS2      | 14q21.3   | -0.354503798 | 1.12E-06 | 1.15E-05 |
| ATF1      | 12q13.12  | -0.354499613 | 1.12E-06 | 1.15E-05 |
| IRAK2     | 3p25.3    | 0.354489151  | 1.12E-06 | 1.15E-05 |
| CFAP161   | 15q25.1   | -0.354478478 | 1.13E-06 | 1.15E-05 |
| WFDC5     | 20q13.12  | 0.354290174  | 1.14E-06 | 1.17E-05 |
| ZNF366    | 5q13.2 5c | -0.354269454 | 1.14E-06 | 1.17E-05 |
| SECISBP2I | 15q21.1   | -0.354133451 | 1.15E-06 | 1.18E-05 |
| PARD6B    | 20q13.13  | 0.353901199  | 1.17E-06 | 1.2E-05  |
| IL10RB    | 21q22.11  | 0.353869814  | 1.18E-06 | 1.2E-05  |
| PTGER4P2- | 9q13      | -0.353770989 | 1.19E-06 | 1.21E-05 |
| RET       | 10q11.21  | -0.353708702 | 1.19E-06 | 1.21E-05 |
| CYP4F11   | 19p13.12  | 0.353702425  | 1.19E-06 | 1.21E-05 |
| TRAPPC8   | 18q12.1   | -0.353656393 | 1.2E-06  | 1.22E-05 |
| NIPSNAP2  | 7p11.2    | -0.353560145 | 1.2E-06  | 1.23E-05 |
| CCDC178   | 18q12.1   | -0.353554331 | 1.2E-06  | 1.23E-05 |
| HPCAL1    | 2p25.1    | 0.353512021  | 1.21E-06 | 1.23E-05 |
| RPSAP52   | 12q14.3   | 0.353473871  | 1.21E-06 | 1.23E-05 |
| RBM11     | 21q11.2   | -0.353453435 | 1.21E-06 | 1.23E-05 |
| UGT1A8    | 2q37.1    | 0.353413929  | 1.22E-06 | 1.24E-05 |
| ABTB2     | 11p13     | 0.353365556  | 1.22E-06 | 1.24E-05 |
| DNAH6     | 2p11.2    | -0.3532714   | 1.23E-06 | 1.25E-05 |
| RPS6KA5   | 14q32.11  | -0.353252568 | 1.23E-06 | 1.25E-05 |
| ACVR2B    | 3p22.2    | -0.353244199 | 1.23E-06 | 1.25E-05 |
| C18ORF32  | 18q21.1   | -0.353187705 | 1.24E-06 | 1.25E-05 |
| SHE       | 1q21.3    | -0.353177244 | 1.24E-06 | 1.25E-05 |
| TMEM121B  | 22q11.1   | -0.353144997 | 1.24E-06 | 1.26E-05 |
| KIAA1324I | 7q21.12   | -0.353127027 | 1.24E-06 | 1.26E-05 |
| CSF2      | 5q31.1    | 0.353114661  | 1.24E-06 | 1.26E-05 |
| FRMD4A    | 10p13     | -0.353066349 | 1.25E-06 | 1.26E-05 |
| CCDC115   | 2q21.1    | 0.352913607  | 1.26E-06 | 1.28E-05 |
| ZKSCAN1   | 7q22.1    | -0.352894775 | 1.27E-06 | 1.28E-05 |
| PNP       | 14q11.2   | 0.352890591  | 1.27E-06 | 1.28E-05 |
| KBTBD7    | 13q14.11  | -0.352808989 | 1.27E-06 | 1.28E-05 |
| SLCO5A1   | 8q13.3    | -0.352777603 | 1.28E-06 | 1.29E-05 |
| LZTFL1    | 3p21.31   | -0.35267717  | 1.29E-06 | 1.29E-05 |
| F3        | 1p21.3    | 0.352660431  | 1.29E-06 | 1.3E-05  |
| RBM20     | 10q25.2   | -0.352635323 | 1.29E-06 | 1.3E-05  |
| GDF11     | 12q13.2   | -0.35260603  | 1.29E-06 | 1.3E-05  |
| KLLN      | 10q23.31  | -0.352518151 | 1.3E-06  | 1.31E-05 |
| ZNF396    | 18q12.2   | -0.352495135 | 1.3E-06  | 1.31E-05 |
| FIBP      | 11q13.1   | 0.352478396  | 1.3E-06  | 1.31E-05 |
| NIM1K     | 5p12      | -0.352476304 | 1.31E-06 | 1.31E-05 |
| PPIA      | 7p13      | 0.352453288  | 1.31E-06 | 1.31E-05 |
| AMIGO2    | 12q13.11  | 0.352279623  | 1.32E-06 | 1.33E-05 |
| SYNM      | 15q26.3   | -0.352260791 | 1.33E-06 | 1.33E-05 |
| KAT6B     | 10q22.2   | -0.352141527 | 1.34E-06 | 1.34E-05 |

|           |          |              |          |          |
|-----------|----------|--------------|----------|----------|
| PLPPR1    | 9q31.1   | -0.352119337 | 1.34E-06 | 1.34E-05 |
| RBM42     | 19q13.12 | 0.351892537  | 1.36E-06 | 1.36E-05 |
| PIK3R3    | 1p34.1   | -0.351850689 | 1.37E-06 | 1.37E-05 |
| NEK1      | 4q33     | -0.351838135 | 1.37E-06 | 1.37E-05 |
| FZD2      | 17q21.31 | 0.351827674  | 1.37E-06 | 1.37E-05 |
| SRPK2     | 7q22.3   | -0.351714686 | 1.38E-06 | 1.38E-05 |
| ZNF615    | 19q13.41 | -0.351702132 | 1.38E-06 | 1.38E-05 |
| TTC33     | 5p13.1   | -0.351683301 | 1.38E-06 | 1.38E-05 |
| SNRPA     | 19q13.2  | 0.35162053   | 1.39E-06 | 1.39E-05 |
| PREX1     | 20q13.13 | -0.351605884 | 1.39E-06 | 1.39E-05 |
| ANKRD13A  | 12q24.11 | -0.351555667 | 1.4E-06  | 1.39E-05 |
| SIRT6     | 19p13.3  | 0.351541021  | 1.4E-06  | 1.39E-05 |
| ARSG      | 17q24.2  | -0.351526374 | 1.4E-06  | 1.39E-05 |
| MICA      | 6p21.33  | 0.351509635  | 1.4E-06  | 1.39E-05 |
| PHF24     | 9p13.3   | -0.351508278 | 1.4E-06  | 1.39E-05 |
| RCBTB1    | 13q14.2  | -0.351469881 | 1.41E-06 | 1.4E-05  |
| F2RL1     | 5q13.3   | 0.351348524  | 1.42E-06 | 1.41E-05 |
| ABHD11    | 7q11.23  | 0.351308769  | 1.42E-06 | 1.41E-05 |
| EXOC5     | 14q22.3  | -0.351308769 | 1.42E-06 | 1.41E-05 |
| IFNE      | 9p21.3   | 0.351237557  | 1.43E-06 | 1.42E-05 |
| ARPC4     | 3p25.3   | 0.350934237  | 1.46E-06 | 1.45E-05 |
| EIF2AK3   | 2p11.2   | -0.350921683 | 1.46E-06 | 1.45E-05 |
| VGLL1     | Xq26.3   | 0.350900669  | 1.47E-06 | 1.45E-05 |
| C10ORF91  | 10q26.3  | 0.350812145  | 1.48E-06 | 1.46E-05 |
| FAM160A2  | 11p15.4  | 0.350808696  | 1.48E-06 | 1.46E-05 |
| LDB2      | 4p15.32  | -0.350789865 | 1.48E-06 | 1.46E-05 |
| SLC12A1   | 15q21.1  | -0.350763562 | 1.48E-06 | 1.46E-05 |
| YPEL2     | 17q22    | -0.350762664 | 1.48E-06 | 1.46E-05 |
| USP30     | 12q24.11 | -0.350756387 | 1.48E-06 | 1.46E-05 |
| FHL2      | 2q12.2   | 0.350595275  | 1.5E-06  | 1.48E-05 |
| TSKU      | 11q13.5  | 0.35056389   | 1.5E-06  | 1.48E-05 |
| BPTF      | 17q24.2  | -0.350522043 | 1.51E-06 | 1.49E-05 |
| IL12RB2   | 1p31.3   | -0.350422839 | 1.52E-06 | 1.49E-05 |
| PDE7B     | 6q23.3   | -0.350419518 | 1.52E-06 | 1.49E-05 |
| PLPP3     | 1p32.2   | -0.350409056 | 1.52E-06 | 1.5E-05  |
| SPC24     | 19p13.2  | 0.350394409  | 1.52E-06 | 1.5E-05  |
| PHLDB2    | 3q13.2   | -0.350363024 | 1.52E-06 | 1.5E-05  |
| SART1     | 11q13.1  | 0.350293976  | 1.53E-06 | 1.51E-05 |
| LINC00261 | 20p11.21 | -0.350254221 | 1.54E-06 | 1.51E-05 |
| NEGR1     | 1p31.1   | -0.350222836 | 1.54E-06 | 1.51E-05 |
| B3GNTL1   | 17q25.3  | 0.350178896  | 1.55E-06 | 1.52E-05 |
| HMG20B    | 19p13.3  | 0.350166342  | 1.55E-06 | 1.52E-05 |
| TMEM120A  | 7q11.23  | 0.350111941  | 1.55E-06 | 1.52E-05 |
| B3GALT1   | 2q24.3   | -0.350060291 | 1.56E-06 | 1.53E-05 |
| PKD1L2    | 16q23.2  | 0.350003871  | 1.57E-06 | 1.53E-05 |
| SHF       | 15q21.1  | 0.349927814  | 1.57E-06 | 1.54E-05 |
| LMNB2     | 19p13.3  | 0.349869228  | 1.58E-06 | 1.55E-05 |
| MPP1      | Xq28     | -0.349823196 | 1.59E-06 | 1.55E-05 |
| PPP1R14D  | 15q15.1  | 0.349772979  | 1.59E-06 | 1.56E-05 |
| FLJ16779  | 20q13.33 | 0.349735054  | 1.6E-06  | 1.56E-05 |
| NUDT9     | 4q22.1   | -0.349708116 | 1.6E-06  | 1.56E-05 |
| HSD11B2   | 16q22.1  | 0.349687193  | 1.6E-06  | 1.56E-05 |
| PSMD4     | 1q21.3   | 0.34964953   | 1.61E-06 | 1.57E-05 |
| KIAA0355  | 19q13.11 | -0.349639068 | 1.61E-06 | 1.57E-05 |

|           |           |              |          |          |
|-----------|-----------|--------------|----------|----------|
| SSTR2     | 17q25.1   | -0.349611868 | 1.61E-06 | 1.57E-05 |
| MTX1      | 1q22      | 0.349463311  | 1.63E-06 | 1.59E-05 |
| ZNF664    | 12q24.31  | -0.349423556 | 1.63E-06 | 1.59E-05 |
| ZNF207    | 17q11.2   | 0.349352416  | 1.64E-06 | 1.6E-05  |
| PDS5A     | 4p14      | -0.349316846 | 1.65E-06 | 1.6E-05  |
| STX10     | 19p13.13  | 0.349306384  | 1.65E-06 | 1.6E-05  |
| HELZ2     | 20q13.33  | 0.349210135  | 1.66E-06 | 1.61E-05 |
| SLX1B     | 16p11.2   | 0.349145272  | 1.67E-06 | 1.62E-05 |
| C8ORF74   | 8p23.1    | 0.349097609  | 1.67E-06 | 1.62E-05 |
| MOCS2     | 5q11.2    | -0.349082502 | 1.67E-06 | 1.62E-05 |
| THUMPD2   | 2p22.1 2f | 0.349067855  | 1.68E-06 | 1.63E-05 |
| EXTL3     | 8p21.1    | -0.3490281   | 1.68E-06 | 1.63E-05 |
| DUSP4     | 8p12      | 0.348996715  | 1.68E-06 | 1.63E-05 |
| AIMP2     | 7p22.1    | 0.348887912  | 1.7E-06  | 1.64E-05 |
| AGO1      | 1p34.3    | -0.348724709 | 1.72E-06 | 1.66E-05 |
| CTTNBP2   | 7q31.31   | -0.348695416 | 1.72E-06 | 1.67E-05 |
| CDC20     | 1p34.2    | 0.348590798  | 1.74E-06 | 1.68E-05 |
| PTGFR     | 1p31.1    | -0.348528027 | 1.74E-06 | 1.69E-05 |
| IKBKB     | 8p11.21   | 0.34852175   | 1.74E-06 | 1.69E-05 |
| SAP30L    | 5q33.2    | -0.34848618  | 1.75E-06 | 1.69E-05 |
| ASPHD2    | 22q12.1   | 0.348471533  | 1.75E-06 | 1.69E-05 |
| KIAA1328  | 18q12.2   | -0.348446425 | 1.75E-06 | 1.69E-05 |
| WAC       | 10p12.1 1 | -0.348421317 | 1.76E-06 | 1.69E-05 |
| FANK1     | 10q26.2   | 0.348398301  | 1.76E-06 | 1.7E-05  |
| PCBP2     | 12q13.13  | -0.348396209 | 1.76E-06 | 1.7E-05  |
| NEAT1     | 11q13.1   | 0.348389932  | 1.76E-06 | 1.7E-05  |
| PWARSN    | 15q11.2   | -0.348381562 | 1.76E-06 | 1.7E-05  |
| NRG2      | 5q31.2    | -0.348228279 | 1.78E-06 | 1.71E-05 |
| ZNF853    | 7p22.1    | -0.348222543 | 1.78E-06 | 1.71E-05 |
| ELP5      | 17p13.1   | -0.348186973 | 1.79E-06 | 1.72E-05 |
| PCDH17    | 13q21.1   | -0.348057247 | 1.8E-06  | 1.73E-05 |
| GPR108    | 19p13.3   | 0.347986107  | 1.81E-06 | 1.74E-05 |
| ORMDL2    | 12q13.2   | 0.347889858  | 1.83E-06 | 1.75E-05 |
| TOM1L2    | 17p11.2   | -0.347837549 | 1.83E-06 | 1.76E-05 |
| RALA      | 7p14.1    | 0.347824995  | 1.83E-06 | 1.76E-05 |
| GPRASP1   | Xq22.1    | -0.347785241 | 1.84E-06 | 1.76E-05 |
| LINC00482 | 17q25.3   | 0.34772247   | 1.85E-06 | 1.77E-05 |
| CELSR1    | 22q13.31  | 0.347691084  | 1.85E-06 | 1.77E-05 |
| TUT4      | 1p32.3    | -0.34765133  | 1.86E-06 | 1.78E-05 |
| TBC1D19   | 4p15.2    | -0.347567635 | 1.87E-06 | 1.79E-05 |
| MXD3      | 5q35.3    | 0.347559266  | 1.87E-06 | 1.79E-05 |
| TCFL5     | 20q13.33  | -0.347513234 | 1.88E-06 | 1.79E-05 |
| ZNF268    | 12q24.33  | -0.347398155 | 1.89E-06 | 1.81E-05 |
| DMGDH     | 5q14.1    | -0.3473584   | 1.9E-06  | 1.81E-05 |
| DPH5      | 1p21.2    | -0.347268428 | 1.91E-06 | 1.82E-05 |
| 11-Mar    | 5p15.1    | -0.34726529  | 1.91E-06 | 1.82E-05 |
| FIG4      | 6q21      | -0.347203565 | 1.92E-06 | 1.83E-05 |
| PHKG2     | 16p11.2   | 0.347117779  | 1.93E-06 | 1.84E-05 |
| TMEM171   | 5q13.2    | 0.347095991  | 1.93E-06 | 1.84E-05 |
| RHBDF2    | 17q25.1   | 0.34706547   | 1.94E-06 | 1.85E-05 |
| ARHGDI A  | 17q25.3   | 0.346921097  | 1.96E-06 | 1.86E-05 |
| EP400     | 12q24.33  | -0.346686753 | 1.99E-06 | 1.9E-05  |
| DYM       | 18q21.1   | -0.346646999 | 2E-06    | 1.9E-05  |
| USP27X    | Xp11.23   | -0.34663026  | 2E-06    | 1.9E-05  |

|           |          |              |          |          |
|-----------|----------|--------------|----------|----------|
| BCAS1     | 20q13.2  | 0.346603059  | 2.01E-06 | 1.9E-05  |
| PRXL2C    | 9q22.33  | -0.346561212 | 2.01E-06 | 1.91E-05 |
| TTBK2     | 15q15.2  | -0.346339422 | 2.04E-06 | 1.94E-05 |
| GCLC      | 6p12.1   | -0.346316406 | 2.05E-06 | 1.94E-05 |
| SNPH      | 20p13    | -0.346305944 | 2.05E-06 | 1.94E-05 |
| LOC646762 | 7p14.3   | -0.346289206 | 2.05E-06 | 1.94E-05 |
| S100A12   | 1q21.3   | -0.34628604  | 2.05E-06 | 1.94E-05 |
| TRRAP     | 7q22.1   | -0.346180403 | 2.07E-06 | 1.96E-05 |
| CCNT1     | 12q13.11 | -0.346174126 | 2.07E-06 | 1.96E-05 |
| UBE4B     | 1p36.22  | -0.346048585 | 2.09E-06 | 1.97E-05 |
| TCHP      | 12q24.11 | -0.345983721 | 2.1E-06  | 1.98E-05 |
| RNF138P1  | 5q11.2   | -0.345972394 | 2.1E-06  | 1.98E-05 |
| PSMA5     | 1p13.3   | 0.345879104  | 2.11E-06 | 1.99E-05 |
| BOLA2     | 16p11.2  | 0.345824702  | 2.12E-06 | 2E-05    |
| TRIM8     | 10q24.32 | 0.345795409  | 2.13E-06 | 2E-05    |
| PDK3      | Xp22.11  | -0.345770482 | 2.13E-06 | 2.01E-05 |
| KIZ       | 20p11.23 | -0.345766116 | 2.13E-06 | 2.01E-05 |
| COMMD10   | 5q23.1   | -0.345736823 | 2.13E-06 | 2.01E-05 |
| DLG4      | 17p13.1  | -0.345667776 | 2.15E-06 | 2.02E-05 |
| BCAR3     | 1p22.1   | 0.345320444  | 2.2E-06  | 2.07E-05 |
| SLC14A2   | 18q12.3  | -0.345272448 | 2.21E-06 | 2.08E-05 |
| FOXJ3     | 1p34.2   | -0.345173979 | 2.22E-06 | 2.09E-05 |
| RAI2      | Xp22.13  | -0.345167702 | 2.22E-06 | 2.09E-05 |
| HGS       | 17q25.3  | 0.345121671  | 2.23E-06 | 2.1E-05  |
| ZNF180    | 19q13.31 | -0.345092378 | 2.24E-06 | 2.1E-05  |
| TXNDC15   | 5q31.1   | -0.345056807 | 2.24E-06 | 2.1E-05  |
| PFKL      | 21q22.3  | 0.345025422  | 2.25E-06 | 2.11E-05 |
| CLDN7     | 17p13.1  | 0.344994037  | 2.25E-06 | 2.11E-05 |
| F8        | Xq28     | -0.344981483 | 2.25E-06 | 2.11E-05 |
| LINC01128 | 1p36.33  | -0.344960559 | 2.26E-06 | 2.11E-05 |
| GYG2      | Xp22.33  | -0.344889419 | 2.27E-06 | 2.12E-05 |
| STK35     | 20p13    | -0.344843387 | 2.28E-06 | 2.13E-05 |
| TLCD1     | 17q11.2  | 0.344830833  | 2.28E-06 | 2.13E-05 |
| PWAR5     | 15q11.2  | -0.34480309  | 2.28E-06 | 2.13E-05 |
| NTRK2     | 9q21.33  | -0.344786893 | 2.29E-06 | 2.14E-05 |
| RHOV      | 15q15.1  | 0.344740862  | 2.29E-06 | 2.14E-05 |
| RAPGEF2   | 4q32.1   | -0.344661352 | 2.31E-06 | 2.15E-05 |
| GK        | Xp21.2   | -0.344558827 | 2.32E-06 | 2.17E-05 |
| NBPF3     | 1p36.12  | -0.34455255  | 2.32E-06 | 2.17E-05 |
| FGD6      | 12q22    | 0.34454418   | 2.33E-06 | 2.17E-05 |
| SERPINE2  | 2q36.1   | -0.344531626 | 2.33E-06 | 2.17E-05 |
| SLC12A9   | 7q22.1   | 0.344498148  | 2.33E-06 | 2.17E-05 |
| TNFRSF10A | 8p21.3   | 0.344489779  | 2.34E-06 | 2.17E-05 |
| FANCL     | 2p16.1   | 0.344433285  | 2.34E-06 | 2.18E-05 |
| PRR15L    | 17q21.32 | 0.344416546  | 2.35E-06 | 2.18E-05 |
| PTAR1     | 9q21.12  | -0.344410269 | 2.35E-06 | 2.18E-05 |
| ZNF596    | 8p23.3   | -0.344383069 | 2.35E-06 | 2.19E-05 |
| PPM1G     | 2p23.3   | 0.34436633   | 2.36E-06 | 2.19E-05 |
| ARG2      | 14q24.1  | -0.34433076  | 2.36E-06 | 2.19E-05 |
| ENPP4     | 6p21.1   | -0.34433076  | 2.36E-06 | 2.19E-05 |
| TPRG1     | 3q28     | 0.34432239   | 2.36E-06 | 2.19E-05 |
| METTL7A   | 12q13.12 | -0.344293097 | 2.37E-06 | 2.2E-05  |
| FAM110B   | 8q12.1   | -0.344278451 | 2.37E-06 | 2.2E-05  |
| AKAP9     | 7q21.2   | -0.344175925 | 2.39E-06 | 2.21E-05 |



|           |           |              |          |          |
|-----------|-----------|--------------|----------|----------|
| AGBL4     | 1p33      | -0.344163614 | 2.39E-06 | 2.21E-05 |
| SIGLEC15  | 18q12.3   | 0.344157848  | 2.39E-06 | 2.21E-05 |
| RTKN2     | 10q21.2   | 0.344083862  | 2.4E-06  | 2.22E-05 |
| LINC00896 | 22q11.21  | 0.344067843  | 2.41E-06 | 2.22E-05 |
| EPC1      | 10p11.22  | -0.344067123 | 2.41E-06 | 2.22E-05 |
| MMGT1     | Xq26.3    | -0.344033645 | 2.41E-06 | 2.23E-05 |
| KRT222    | 17q21.2   | -0.34399389  | 2.42E-06 | 2.23E-05 |
| MIDN      | 19p13.3   | 0.34395832   | 2.43E-06 | 2.24E-05 |
| DIPK1B    | 9q34.3    | -0.343954136 | 2.43E-06 | 2.24E-05 |
| OST4      | 2p23.3    | 0.343952043  | 2.43E-06 | 2.24E-05 |
| MLX       | 17q21.2   | 0.343820225  | 2.45E-06 | 2.26E-05 |
| MRPL11    | 11q13.2   | 0.343782562  | 2.46E-06 | 2.26E-05 |
| FGF3      | 11q13.3   | 0.343753472  | 2.46E-06 | 2.27E-05 |
| DIS3L2    | 2q37.1    | 0.343677944  | 2.48E-06 | 2.28E-05 |
| SACM1L    | 3p21.31   | -0.343659113 | 2.48E-06 | 2.28E-05 |
| TPM4      | 19p13.12- | 0.343648651  | 2.48E-06 | 2.28E-05 |
| GNPDA2    | 4p12      | -0.343642374 | 2.48E-06 | 2.28E-05 |
| KCNA3     | 1p13.3    | -0.343598435 | 2.49E-06 | 2.29E-05 |
| FAM114A2  | 5q33.2    | -0.34359425  | 2.49E-06 | 2.29E-05 |
| LSM4      | 19p13.11  | 0.343539849  | 2.5E-06  | 2.29E-05 |
| USP46     | 4q12      | -0.343437323 | 2.52E-06 | 2.31E-05 |
| ALAS1     | 3p21.2    | 0.343410123  | 2.52E-06 | 2.31E-05 |
| ARID2     | 12q12     | -0.343403846 | 2.52E-06 | 2.31E-05 |
| C3ORF52   | 3q13.2    | 0.343376645  | 2.53E-06 | 2.32E-05 |
| FOXD2-AS1 | 1p33      | 0.343355901  | 2.53E-06 | 2.32E-05 |
| AHSG      | 3q27.3    | 0.343355366  | 2.53E-06 | 2.32E-05 |
| NKAPL     | 6p22.1    | -0.343157127 | 2.57E-06 | 2.35E-05 |
| NAP1L3    | Xq21.32   | -0.343029314 | 2.59E-06 | 2.37E-05 |
| RDM1      | 17q12     | 0.343025309  | 2.59E-06 | 2.37E-05 |
| ZNF141    | 4p16.3    | -0.34301676  | 2.6E-06  | 2.37E-05 |
| MAP3K12   | 12q13.13  | -0.342949804 | 2.61E-06 | 2.38E-05 |
| CPEB1     | 15q25.2   | -0.342858966 | 2.62E-06 | 2.4E-05  |
| AMIG01    | 1p13.3    | -0.342847279 | 2.63E-06 | 2.4E-05  |
| AP1S1     | 7q22.1    | 0.342788693  | 2.64E-06 | 2.41E-05 |
| STAT4     | 2q32.2-q3 | -0.342763585 | 2.64E-06 | 2.41E-05 |
| BTBD9     | 6p21.2    | -0.342761492 | 2.64E-06 | 2.41E-05 |
| PORCN     | Xp11.23   | 0.342690352  | 2.66E-06 | 2.42E-05 |
| CACNA2D2  | 3p21.31   | -0.342648505 | 2.66E-06 | 2.42E-05 |
| SLC22A3   | 6q25.3    | 0.342642228  | 2.67E-06 | 2.42E-05 |
| VPS33A    | 12q24.31  | -0.342635951 | 2.67E-06 | 2.42E-05 |
| MOB1B     | 4q13.3    | -0.342606658 | 2.67E-06 | 2.43E-05 |
| NBEA      | 13q13.3   | -0.342575273 | 2.68E-06 | 2.43E-05 |
| ZNF831    | 20q13.32  | -0.342550164 | 2.68E-06 | 2.44E-05 |
| AREG      | 4q13.3    | 0.342485301  | 2.7E-06  | 2.45E-05 |
| TMCC2     | 1q32.1    | -0.342468562 | 2.7E-06  | 2.45E-05 |
| MEX3D     | 19p13.3   | 0.34246647   | 2.7E-06  | 2.45E-05 |
| STOX1     | 10q22.1   | -0.342428808 | 2.71E-06 | 2.45E-05 |
| SLC10A6   | 4q21.3    | -0.342375151 | 2.72E-06 | 2.46E-05 |
| APOOL     | Xq21.1    | -0.342353483 | 2.72E-06 | 2.46E-05 |
| ADRB1     | 10q25.3   | -0.34235139  | 2.72E-06 | 2.46E-05 |
| ASF1A     | 6q22.31   | -0.342271881 | 2.74E-06 | 2.48E-05 |
| ADGRB3    | 6q12-q13  | -0.342251852 | 2.74E-06 | 2.48E-05 |
| RAB9B     | Xq22.2    | -0.342217659 | 2.75E-06 | 2.48E-05 |
| DLG2      | 11q14.1   | -0.342110769 | 2.77E-06 | 2.5E-05  |

|           |           |              |          |          |
|-----------|-----------|--------------|----------|----------|
| ELOVL4    | 6q14.1    | -0.342012429 | 2.79E-06 | 2.52E-05 |
| ZNF286B   | 17p11.2   | -0.341999874 | 2.79E-06 | 2.52E-05 |
| ARHGAP32  | 11q24.3   | 0.341983136  | 2.79E-06 | 2.52E-05 |
| UBR7      | 14q32.12  | -0.341958027 | 2.8E-06  | 2.52E-05 |
| SQOR      | 15q21.1   | 0.341932919  | 2.8E-06  | 2.53E-05 |
| CRADD     | 12q22     | -0.341872241 | 2.82E-06 | 2.54E-05 |
| HLF       | 17q22     | -0.341849225 | 2.82E-06 | 2.54E-05 |
| TMEM192   | 4q32.3    | -0.341834578 | 2.82E-06 | 2.54E-05 |
| SERPINB2  | 18q21.33- | 0.341730986  | 2.84E-06 | 2.56E-05 |
| YAF2      | 12q12     | -0.34163162  | 2.86E-06 | 2.58E-05 |
| MUC16     | 19p13.2   | 0.341625864  | 2.87E-06 | 2.58E-05 |
| TFF2      | 21q22.3   | 0.341479899  | 2.9E-06  | 2.6E-05  |
| ZFP28     | 19q13.43  | -0.341426569 | 2.91E-06 | 2.61E-05 |
| C11ORF95  | 11q13.1   | -0.341420292 | 2.91E-06 | 2.61E-05 |
| LINC00922 | 16q21     | 0.341402323  | 2.91E-06 | 2.61E-05 |
| TSPYL5    | 8q22.1    | -0.341353336 | 2.92E-06 | 2.62E-05 |
| NUP88     | 17p13.2   | -0.341344967 | 2.92E-06 | 2.62E-05 |
| MARCKSL1  | 1p35.1    | 0.341342874  | 2.92E-06 | 2.62E-05 |
| CCNO      | 5q11.2    | 0.341305212  | 2.93E-06 | 2.63E-05 |
| MSI1      | 12q24.31  | -0.341227795 | 2.95E-06 | 2.64E-05 |
| BEND4     | 4p13      | -0.341211431 | 2.95E-06 | 2.64E-05 |
| CTNS      | 17p13.2   | -0.341137824 | 2.97E-06 | 2.65E-05 |
| C10ORF55  | 10q22.2   | 0.341124961  | 2.97E-06 | 2.66E-05 |
| PSORS1C3  | 6p21.33   | 0.341095078  | 2.98E-06 | 2.66E-05 |
| ZNF445    | 3p21.31   | -0.341075053 | 2.98E-06 | 2.66E-05 |
| ADGRV1    | 5q14.3    | -0.341060585 | 2.98E-06 | 2.66E-05 |
| WWOX      | 16q23.1-c | -0.34103739  | 2.99E-06 | 2.67E-05 |
| CTSD      | 11p15.5   | 0.341014374  | 2.99E-06 | 2.67E-05 |
| NOVA1     | 14q12     | -0.340997636 | 3E-06    | 2.67E-05 |
| GAS2      | 11p14.3   | -0.340964158 | 3E-06    | 2.68E-05 |
| ARF6      | 14q21.3   | 0.340949511  | 3.01E-06 | 2.68E-05 |
| SORCS1    | 10q25.1   | -0.340932773 | 3.01E-06 | 2.68E-05 |
| AK4       | 1p31.3    | 0.340849078  | 3.03E-06 | 2.7E-05  |
| ATOX1A    | 2p11.2    | -0.340775846 | 3.04E-06 | 2.71E-05 |
| ATP8A1    | 4p13      | -0.340692152 | 3.06E-06 | 2.72E-05 |
| RLN1      | 9p24.1    | -0.340556936 | 3.09E-06 | 2.75E-05 |
| ERO1A     | 14q22.1   | 0.340466177  | 3.11E-06 | 2.77E-05 |
| GRIA1     | 5q33.2    | -0.340441183 | 3.12E-06 | 2.77E-05 |
| IRAK1BP1  | 6q14.1    | -0.340390852 | 3.13E-06 | 2.78E-05 |
| BCDIN3D-A | 12q13.12  | -0.340367836 | 3.13E-06 | 2.78E-05 |
| RECK      | 9p13.3    | -0.34034482  | 3.14E-06 | 2.78E-05 |
| TMSB4XP8  | 4q22.1    | 0.340328082  | 3.14E-06 | 2.79E-05 |
| TNFSF9    | 19p13.3   | 0.340315527  | 3.15E-06 | 2.79E-05 |
| CD302     | 2q24.2    | -0.340311343 | 3.15E-06 | 2.79E-05 |
| GABRB3    | 15q12     | -0.34030925  | 3.15E-06 | 2.79E-05 |
| RMI1      | 9q21.32   | -0.340298789 | 3.15E-06 | 2.79E-05 |
| PTPRR     | 12q15     | 0.340240203  | 3.16E-06 | 2.8E-05  |
| ANXA2P3   | 10q21.3   | 0.340128439  | 3.19E-06 | 2.82E-05 |
| AP4B1     | 1p13.2    | 0.34009583   | 3.19E-06 | 2.82E-05 |
| CPEB3     | 10q23.32  | -0.340068629 | 3.2E-06  | 2.83E-05 |
| FAM126A   | 7p15.3    | -0.340030967 | 3.21E-06 | 2.83E-05 |
| ETV7      | 6p21.31   | 0.339976566  | 3.22E-06 | 2.84E-05 |
| AMPH      | 7p14.1    | -0.339897056 | 3.24E-06 | 2.86E-05 |
| SESN3     | 11q21     | -0.339884502 | 3.24E-06 | 2.86E-05 |

|           |           |               |           |           |
|-----------|-----------|---------------|-----------|-----------|
| LIN54     | 4q21. 22  | -0. 339857301 | 3. 25E-06 | 2. 86E-05 |
| LPCAT2    | 16q12. 2  | 0. 339844747  | 3. 25E-06 | 2. 87E-05 |
| ZNF677    | 19q13. 42 | -0. 339807085 | 3. 26E-06 | 2. 87E-05 |
| ANKRD22   | 10q23. 31 | 0. 339788254  | 3. 26E-06 | 2. 87E-05 |
| CAV2      | 7q31. 2   | 0. 339781976  | 3. 27E-06 | 2. 87E-05 |
| VDAC1     | 5q31. 1   | 0. 339765238  | 3. 27E-06 | 2. 88E-05 |
| IPW       | 15q11. 2  | -0. 339763145 | 3. 27E-06 | 2. 88E-05 |
| HAGHL     | 16p13. 3  | 0. 339742222  | 3. 28E-06 | 2. 88E-05 |
| SLC29A2   | 11q13. 2  | 0. 339735945  | 3. 28E-06 | 2. 88E-05 |
| MIA       | 19q13. 2  | 0. 339677359  | 3. 29E-06 | 2. 89E-05 |
| PHF2      | 9q22. 31  | -0. 33936769  | 3. 36E-06 | 2. 95E-05 |
| TNKS2     | 10q23. 32 | -0. 339346766 | 3. 37E-06 | 2. 96E-05 |
| ZNF829    | 19q13. 12 | -0. 339323116 | 3. 37E-06 | 2. 96E-05 |
| WDFY3-AS2 | 4q21. 23  | -0. 339313289 | 3. 38E-06 | 2. 96E-05 |
| USP45     | 6q16. 2   | -0. 33929045  | 3. 38E-06 | 2. 96E-05 |
| KCND3     | 1p13. 2   | -0. 339229772 | 3. 4E-06  | 2. 97E-05 |
| BAD       | 11q13. 1  | 0. 33921704   | 3. 4E-06  | 2. 98E-05 |
| ZYG11B    | 1p32. 3   | -0. 339053836 | 3. 44E-06 | 3. 01E-05 |
| ERN1      | 17q23. 3  | -0. 339028728 | 3. 44E-06 | 3. 01E-05 |
| CD55      | 1q32. 2   | 0. 339007804  | 3. 45E-06 | 3. 02E-05 |
| MAN1C1    | 1p36. 11  | -0. 338961773 | 3. 46E-06 | 3. 02E-05 |
| DSG3      | 18q12. 1  | 0. 338919392  | 3. 47E-06 | 3. 03E-05 |
| SCML4     | 6q21      | -0. 338911556 | 3. 47E-06 | 3. 03E-05 |
| CPQ       | 8q22. 1   | -0. 338899002 | 3. 48E-06 | 3. 03E-05 |
| SELENOH   | 11q12. 1  | 0. 33889691   | 3. 48E-06 | 3. 03E-05 |
| ZCCHC2    | 18q21. 33 | -0. 338865524 | 3. 48E-06 | 3. 04E-05 |
| UBA7      | 3p21. 31  | 0. 338829954  | 3. 49E-06 | 3. 04E-05 |
| CYB5B     | 16q22. 1  | 0. 338719059  | 3. 52E-06 | 3. 07E-05 |
| MEGF8     | 19q13. 2  | -0. 338706505 | 3. 52E-06 | 3. 07E-05 |
| TSPAN8    | 12q21. 1  | 0. 338662566  | 3. 53E-06 | 3. 08E-05 |
| ZNF10     | 12q24. 33 | -0. 338572594 | 3. 56E-06 | 3. 1E-05  |
| FZD4      | 11q14. 2  | -0. 338555855 | 3. 56E-06 | 3. 1E-05  |
| PLVAP     | 19p13. 11 | -0. 338541209 | 3. 57E-06 | 3. 1E-05  |
| KIAA0232  | 4p16. 1   | -0. 33852447  | 3. 57E-06 | 3. 1E-05  |
| ALOX5     | 10q11. 21 | 0. 338392652  | 3. 6E-06  | 3. 13E-05 |
| KCNK7     | 11q13. 1  | 0. 338330058  | 3. 62E-06 | 3. 14E-05 |
| PKMYT1    | 16p13. 3  | 0. 338183416  | 3. 66E-06 | 3. 17E-05 |
| PEG10     | 7q21. 3   | -0. 338143661 | 3. 67E-06 | 3. 18E-05 |
| RETREG1   | 5p15. 1   | -0. 337997196 | 3. 7E-06  | 3. 21E-05 |
| DENND1A   | 9q33. 3   | -0. 337840269 | 3. 75E-06 | 3. 25E-05 |
| BLCAP     | 20q11. 23 | 0. 337808884  | 3. 75E-06 | 3. 25E-05 |
| CACNA2D1  | 7q21. 11  | -0. 337771222 | 3. 76E-06 | 3. 26E-05 |
| ERCC5     | 13q33. 1  | 0. 337769129  | 3. 76E-06 | 3. 26E-05 |
| MAP1B     | 5q13. 2   | -0. 337697989 | 3. 78E-06 | 3. 27E-05 |
| SMS       | Xp22. 11  | 0. 337693805  | 3. 78E-06 | 3. 27E-05 |
| NCOR1     | 17p12-p11 | -0. 337679158 | 3. 79E-06 | 3. 27E-05 |
| OTX1      | 2p15      | 0. 337643588  | 3. 8E-06  | 3. 28E-05 |
| GHDC      | 17q21. 2  | 0. 337614295  | 3. 8E-06  | 3. 29E-05 |
| TNS3      | 7p12. 3   | -0. 337587094 | 3. 81E-06 | 3. 29E-05 |
| SLF2      | 10q24. 31 | -0. 337580817 | 3. 81E-06 | 3. 29E-05 |
| PDE4DIP   | 1q21. 2   | -0. 337566171 | 3. 82E-06 | 3. 29E-05 |
| CFL2      | 14q13. 1  | -0. 337555709 | 3. 82E-06 | 3. 29E-05 |
| LRRTM2    | 5q31. 2   | -0. 337554839 | 3. 82E-06 | 3. 29E-05 |
| TMEM62    | 15q15. 2  | 0. 337528508  | 3. 83E-06 | 3. 3E-05  |

|           |          |              |          |          |
|-----------|----------|--------------|----------|----------|
| ZCCHC3    | 20p13    | -0.337492938 | 3.84E-06 | 3.3E-05  |
| CHRM3     | 1q43     | -0.337486661 | 3.84E-06 | 3.3E-05  |
| RRM2B     | 8q22.3   | -0.337484569 | 3.84E-06 | 3.3E-05  |
| CARD8     | 19q13.33 | -0.337463645 | 3.85E-06 | 3.31E-05 |
| TOPORS    | 9p21.1   | -0.337446906 | 3.85E-06 | 3.31E-05 |
| CDC42SE2  | 5q31.1   | -0.337377859 | 3.87E-06 | 3.32E-05 |
| FAM229B   | 6q21     | -0.337279694 | 3.9E-06  | 3.35E-05 |
| HSPA1L    | 6p21.33  | -0.337200008 | 3.92E-06 | 3.36E-05 |
| KSR2      | 12q24.22 | -0.337137238 | 3.93E-06 | 3.38E-05 |
| CDC42EP5  | 19q13.42 | 0.337122591  | 3.94E-06 | 3.38E-05 |
| MIR4435-2 | 2q13     | 0.337118406  | 3.94E-06 | 3.38E-05 |
| MEGF6     | 1p36.32  | 0.33699705   | 3.97E-06 | 3.41E-05 |
| KRT4      | 12q13.13 | 0.336946482  | 3.99E-06 | 3.42E-05 |
| QPCTL     | 19q13.32 | 0.336858954  | 4.01E-06 | 3.44E-05 |
| CBX7      | 22q13.1  | -0.336794091 | 4.03E-06 | 3.45E-05 |
| MMP16     | 8q21.3   | -0.33670412  | 4.06E-06 | 3.47E-05 |
| FOSL1     | 11q13.1  | 0.336601594  | 4.08E-06 | 3.49E-05 |
| NR2F6     | 19p13.11 | 0.336586948  | 4.09E-06 | 3.5E-05  |
| TBC1D16   | 17q25.3  | -0.336574394 | 4.09E-06 | 3.5E-05  |
| KIAA0586  | 14q23.1  | -0.33656184  | 4.1E-06  | 3.5E-05  |
| CKS2      | 9q22.2   | 0.336547193  | 4.1E-06  | 3.5E-05  |
| DNAJC12   | 10q21.3  | -0.33652627  | 4.11E-06 | 3.5E-05  |
| HERC2     | 15q13.1  | -0.336478145 | 4.12E-06 | 3.51E-05 |
| ZNF813    | 19q13.42 | -0.336476053 | 4.12E-06 | 3.51E-05 |
| PRPSAP2   | 17p11.2  | -0.336415375 | 4.14E-06 | 3.53E-05 |
| TMPRSS3   | 21q22.3  | 0.336409098  | 4.14E-06 | 3.53E-05 |
| TNNC2     | 20q13.12 | 0.336381897  | 4.15E-06 | 3.53E-05 |
| AVPI1     | 10q24.2  | 0.336377712  | 4.15E-06 | 3.53E-05 |
| LBHD1     | 11q12.3  | 0.336354696  | 4.16E-06 | 3.54E-05 |
| RFXANK    | 19p13.11 | 0.336321219  | 4.17E-06 | 3.54E-05 |
| PIEZO1    | 16q24.3  | 0.336281464  | 4.18E-06 | 3.55E-05 |
| SMYD3     | 1q44     | 0.336222878  | 4.19E-06 | 3.56E-05 |
| GFRA1     | 10q25.3  | -0.336168477 | 4.21E-06 | 3.58E-05 |
| ADGRG6    | 6q24.2   | 0.336074321  | 4.24E-06 | 3.6E-05  |
| COQ10A    | 12q13.3  | -0.336026196 | 4.25E-06 | 3.61E-05 |
| F7        | 13q34    | -0.335988199 | 4.26E-06 | 3.62E-05 |
| TMEM82    | 1p36.21  | 0.335972776  | 4.27E-06 | 3.62E-05 |
| IQGAP3    | 1q22     | 0.335959241  | 4.27E-06 | 3.62E-05 |
| PPP1R42   | 8q13.1   | -0.335906229 | 4.29E-06 | 3.63E-05 |
| LSM12     | 17q21.31 | 0.335900655  | 4.29E-06 | 3.63E-05 |
| AGPAT2    | 9q34.3   | 0.335881824  | 4.3E-06  | 3.64E-05 |
| CNOT4     | 7q33     | -0.335793945 | 4.32E-06 | 3.66E-05 |
| DTYMK     | 2q37.3   | 0.335775114  | 4.33E-06 | 3.66E-05 |
| PSMC4     | 19q13.2  | 0.33575419   | 4.33E-06 | 3.66E-05 |
| PBRM1     | 3p21.1   | -0.335733266 | 4.34E-06 | 3.67E-05 |
| ARID5B    | 10q21.2  | -0.335666311 | 4.36E-06 | 3.68E-05 |
| TIAM1     | 21q22.11 | -0.33546126  | 4.42E-06 | 3.73E-05 |
| LINC02381 | 12q13.13 | 0.335371289  | 4.45E-06 | 3.76E-05 |
| SHB       | 9p13.1   | 0.335191346  | 4.51E-06 | 3.8E-05  |
| JADE1     | 4q28.2   | -0.335116021 | 4.53E-06 | 3.82E-05 |
| MCF2L     | 13q34    | -0.335103467 | 4.53E-06 | 3.82E-05 |
| METTL14   | 4q26     | -0.335063712 | 4.55E-06 | 3.83E-05 |
| FRMD5     | 15q15.3  | 0.334965371  | 4.58E-06 | 3.85E-05 |
| SEMA6D    | 15q21.1  | -0.334965371 | 4.58E-06 | 3.85E-05 |

|           |           |              |          |          |
|-----------|-----------|--------------|----------|----------|
| GRK4      | 4p16.3    | -0.334933986 | 4.59E-06 | 3.86E-05 |
| SPATA7    | 14q31.3   | -0.334932069 | 4.59E-06 | 3.86E-05 |
| SNAP25    | 20p12.2   | -0.334925617 | 4.59E-06 | 3.86E-05 |
| TAL1      | 1p33      | -0.334885862 | 4.6E-06  | 3.87E-05 |
| B3GALT2   | 1q31.2    | -0.334873308 | 4.61E-06 | 3.87E-05 |
| C14ORF119 | 14q11.2   | 0.3348482    | 4.62E-06 | 3.88E-05 |
| NRXN1     | 2p16.3    | -0.334774967 | 4.64E-06 | 3.89E-05 |
| STIM2     | 4p15.2    | -0.334743582 | 4.65E-06 | 3.9E-05  |
| ANO7      | 2q37.3    | 0.334726843  | 4.65E-06 | 3.9E-05  |
| SLC35E4   | 22q12.2   | 0.334691273  | 4.67E-06 | 3.91E-05 |
| CALCRL    | 2q32.1    | -0.33465361  | 4.68E-06 | 3.92E-05 |
| APPL1     | 3p14.3    | -0.334647333 | 4.68E-06 | 3.92E-05 |
| BMPER     | 7p14.3    | -0.334613856 | 4.69E-06 | 3.93E-05 |
| ADAMTSL4  | 1q21.2    | 0.334599209  | 4.7E-06  | 3.93E-05 |
| EIF4E2    | 2q37.1    | 0.334502961  | 4.73E-06 | 3.96E-05 |
| STRN4     | 19q13.32  | 0.334479945  | 4.74E-06 | 3.96E-05 |
| NNT       | 5p12      | -0.334417174 | 4.76E-06 | 3.98E-05 |
| KCNN2     | 5q22.3    | -0.334346209 | 4.78E-06 | 3.99E-05 |
| ZNF135    | 19q13.43  | -0.334343942 | 4.78E-06 | 3.99E-05 |
| ADCY9     | 16p13.3   | -0.33432511  | 4.79E-06 | 4E-05    |
| ZCCHC18   | Xq22.2    | -0.334304187 | 4.79E-06 | 4E-05    |
| ITGA4     | 2q31.3    | -0.334293725 | 4.8E-06  | 4E-05    |
| PCDHB5    | 5q31.3    | -0.334291633 | 4.8E-06  | 4E-05    |
| TCTN1     | 12q24.11  | -0.334251878 | 4.81E-06 | 4.01E-05 |
| ZNF578    | 19q13.41  | -0.334195384 | 4.83E-06 | 4.02E-05 |
| UBE2I     | 16p13.3   | 0.334099136  | 4.86E-06 | 4.05E-05 |
| PLK1      | 16p12.2   | 0.334017534  | 4.89E-06 | 4.07E-05 |
| ZNF781    | 19q13.12  | -0.333932968 | 4.92E-06 | 4.09E-05 |
| HSBP1L1   | 18q23     | 0.333931747  | 4.92E-06 | 4.09E-05 |
| METTL5    | 2q31.1    | 0.333877346  | 4.94E-06 | 4.1E-05  |
| ADORA2A   | 22q11.23  | -0.333868977 | 4.94E-06 | 4.11E-05 |
| RAB11FIP5 | 2p13.2    | 0.33385433   | 4.95E-06 | 4.11E-05 |
| CEP170B   | 14q32.33  | 0.333822945  | 4.96E-06 | 4.12E-05 |
| PPP2R5C   | 14q32.31  | -0.333802021 | 4.96E-06 | 4.12E-05 |
| TBC1D10A  | 22q12.2   | 0.333799929  | 4.96E-06 | 4.12E-05 |
| KCTD11    | 17p13.1   | 0.333793652  | 4.97E-06 | 4.12E-05 |
| AGTRAP    | 1p36.22   | 0.333766451  | 4.98E-06 | 4.12E-05 |
| NRDE2     | 14q32.11  | -0.333758082 | 4.98E-06 | 4.13E-05 |
| MID1      | Xp22.2    | -0.333741343 | 4.98E-06 | 4.13E-05 |
| LRRC37A16 | 17q24.2   | -0.333691126 | 5E-06    | 4.14E-05 |
| HDGFL3    | 15q25.2   | -0.333607432 | 5.03E-06 | 4.16E-05 |
| EMP3      | 19q13.33  | 0.333492352  | 5.07E-06 | 4.19E-05 |
| ZEB1-AS1  | 10p11.22  | 0.333477706  | 5.08E-06 | 4.2E-05  |
| PHF8      | Xp11.22   | -0.333456782 | 5.08E-06 | 4.2E-05  |
| SPINK7    | 5q32      | 0.333370798  | 5.11E-06 | 4.22E-05 |
| TXLNA     | 1p35.2    | -0.333350072 | 5.12E-06 | 4.23E-05 |
| NHS       | Xp22.2-p2 | 0.33334798   | 5.12E-06 | 4.23E-05 |
| KCNK3     | 2p23.3    | -0.333283117 | 5.14E-06 | 4.25E-05 |
| AMOTL1    | 11q21     | -0.33326847  | 5.15E-06 | 4.25E-05 |
| NOG       | 17q22     | 0.333226623  | 5.16E-06 | 4.26E-05 |
| MIRLET7BF | 22q13.31  | 0.333199423  | 5.17E-06 | 4.26E-05 |
| HEY1      | 8q21.13   | -0.333188961 | 5.18E-06 | 4.27E-05 |
| COL25A1   | 4q25      | -0.333094455 | 5.21E-06 | 4.29E-05 |
| USP2      | 11q23.3   | -0.333082251 | 5.22E-06 | 4.29E-05 |

|           |           |              |          |          |
|-----------|-----------|--------------|----------|----------|
| SCN3B     | 11q24.1   | -0.333061327 | 5.22E-06 | 4.3E-05  |
| CD59      | 11p13     | 0.333048773  | 5.23E-06 | 4.3E-05  |
| ICA1L     | 2q33.2    | -0.333044588 | 5.23E-06 | 4.3E-05  |
| CXCL14    | 5q31.1    | 0.333025757  | 5.24E-06 | 4.3E-05  |
| PCDHGA12  | 5q31.3    | -0.332988094 | 5.25E-06 | 4.31E-05 |
| PEX3      | 6q24.2    | -0.332979725 | 5.25E-06 | 4.31E-05 |
| SORBS1    | 10q24.1   | -0.332929509 | 5.27E-06 | 4.33E-05 |
| PAK4      | 19q13.2   | 0.332873015  | 5.29E-06 | 4.34E-05 |
| HDHD3     | 9q32      | 0.332783044  | 5.33E-06 | 4.37E-05 |
| TTC22     | 1p32.3    | 0.332778859  | 5.33E-06 | 4.37E-05 |
| NPAS1     | 19q13.32  | 0.33276212   | 5.33E-06 | 4.37E-05 |
| TEK       | 9p21.2    | -0.332734919 | 5.34E-06 | 4.38E-05 |
| ALK       | 2p23.2-p2 | -0.332716061 | 5.35E-06 | 4.38E-05 |
| GNAL      | 18p11.21  | -0.332711903 | 5.35E-06 | 4.38E-05 |
| POLH      | 6p21.1    | -0.332596824 | 5.39E-06 | 4.41E-05 |
| ARFGEF3   | 6q23.3-q2 | -0.332352018 | 5.49E-06 | 4.48E-05 |
| RNASEH2A  | 19p13.13  | 0.332352018  | 5.49E-06 | 4.48E-05 |
| IQSEC3    | 12p13.33  | -0.332345741 | 5.49E-06 | 4.48E-05 |
| RNF125    | 18q12.1   | -0.332333187 | 5.49E-06 | 4.49E-05 |
| KRT78     | 12q13.13  | 0.33229638   | 5.51E-06 | 4.5E-05  |
| C200RF194 | 20p13     | -0.33229134  | 5.51E-06 | 4.5E-05  |
| ADGRF4    | 6p12.3    | 0.332270416  | 5.52E-06 | 4.5E-05  |
| PSENE1    | 19q13.12  | 0.332228569  | 5.53E-06 | 4.51E-05 |
| PTPDC1    | 9q22.32   | -0.332222292 | 5.54E-06 | 4.51E-05 |
| REPS2     | Xp22.2    | 0.332146967  | 5.56E-06 | 4.53E-05 |
| GATA3-AS1 | 10p14     | 0.332143699  | 5.57E-06 | 4.53E-05 |
| PSMB3     | 17q12     | 0.332098843  | 5.58E-06 | 4.54E-05 |
| OPHN1     | Xq12      | -0.332067458 | 5.59E-06 | 4.55E-05 |
| ZNF280C   | Xq26.1    | -0.332061181 | 5.6E-06  | 4.55E-05 |
| PLCG1     | 20q12     | -0.332059088 | 5.6E-06  | 4.55E-05 |
| GIMAP7    | 7q36.1    | -0.331971209 | 5.63E-06 | 4.58E-05 |
| FAM107A   | 3p14.3-p1 | -0.331950286 | 5.64E-06 | 4.58E-05 |
| PLA2G4C   | 19q13.33  | -0.331934767 | 5.65E-06 | 4.58E-05 |
| STAG2     | Xq25      | -0.331925177 | 5.65E-06 | 4.58E-05 |
| TAF11     | 3p14.1    | -0.331924711 | 5.65E-06 | 4.58E-05 |
| ARL14EP   | 11p14.1   | -0.331906346 | 5.66E-06 | 4.59E-05 |
| ZNF594    | 17p13.2   | -0.331874961 | 5.67E-06 | 4.6E-05  |
| CLSTN2    | 3q23      | -0.331839391 | 5.68E-06 | 4.61E-05 |
| LIMCH1    | 4p13      | -0.331747327 | 5.72E-06 | 4.63E-05 |
| ZNF772    | 19q13.43  | -0.33170548  | 5.74E-06 | 4.64E-05 |
| PLCL2     | 3p24.3    | -0.331607139 | 5.77E-06 | 4.67E-05 |
| FFAR2     | 19q13.12  | -0.331592493 | 5.78E-06 | 4.68E-05 |
| KARS      | 16q23.1   | 0.331573661  | 5.79E-06 | 4.68E-05 |
| LDHD      | 16q23.1   | 0.331548553  | 5.8E-06  | 4.69E-05 |
| GNAS      | 22q11.22- | -0.331469044 | 5.83E-06 | 4.71E-05 |
| VLDLR     | 9p24.2    | -0.331431381 | 5.84E-06 | 4.72E-05 |
| CLDN18    | 3q22.3    | 0.331373489  | 5.87E-06 | 4.74E-05 |
| SERTAD4-1 | 1q32.2    | 0.331303747  | 5.9E-06  | 4.76E-05 |
| ANTXR2    | 4q21.21   | 0.331301655  | 5.9E-06  | 4.76E-05 |
| FBXW10    | 17p11.2   | 0.331239272  | 5.92E-06 | 4.78E-05 |
| CFDP1     | 16q23.1   | 0.331217961  | 5.93E-06 | 4.78E-05 |
| DNAJA4    | 15q25.1   | 0.331148913  | 5.96E-06 | 4.8E-05  |
| TAF12     | 12q14.1   | -0.331096604 | 5.98E-06 | 4.82E-05 |
| CYB5R2    | 11p15.4   | 0.331077773  | 5.99E-06 | 4.82E-05 |

|            |              |              |          |          |
|------------|--------------|--------------|----------|----------|
| FLJ12825   | 12q13.13     | 0.331048653  | 6E-06    | 4.83E-05 |
| CYSTM1     | 5q31.3       | 0.3309334    | 6.05E-06 | 4.87E-05 |
| PTPRD      | 9p24.1-p24.2 | -0.330891553 | 6.06E-06 | 4.88E-05 |
| FOXS1      | 20q11.21     | 0.330891553  | 6.06E-06 | 4.88E-05 |
| EFNA1      | 1q22         | 0.330883184  | 6.07E-06 | 4.88E-05 |
| ASNSD1     | 2q32.2       | -0.330878999 | 6.07E-06 | 4.88E-05 |
| RNF126     | 19p13.3      | 0.330832967  | 6.09E-06 | 4.89E-05 |
| SLC4A8     | 12q13.13     | -0.330832967 | 6.09E-06 | 4.89E-05 |
| TACR1      | 2p12         | -0.330718061 | 6.14E-06 | 4.92E-05 |
| GPR142     | 17q25.1      | -0.330705589 | 6.14E-06 | 4.93E-05 |
| C17ORF53   | 17q21.31     | 0.330540037  | 6.21E-06 | 4.98E-05 |
| CD200R1    | 3q13.2       | -0.330527483 | 6.22E-06 | 4.98E-05 |
| ZNF304     | 19q13.43     | -0.330494005 | 6.23E-06 | 4.99E-05 |
| SNORC      | 2q37.1       | 0.330362888  | 6.29E-06 | 5.04E-05 |
| PCBP4      | 3p21.2       | 0.330343356  | 6.3E-06  | 5.04E-05 |
| ABCA3      | 16p13.3      | -0.330316155 | 6.31E-06 | 5.05E-05 |
| KCTD16     | 5q31.3       | -0.330314063 | 6.31E-06 | 5.05E-05 |
| KXD1       | 19p13.11     | 0.3302764    | 6.33E-06 | 5.06E-05 |
| TENT4B     | 16q12.1      | -0.330253384 | 6.34E-06 | 5.06E-05 |
| IST1       | 16q22.2      | 0.330219907  | 6.35E-06 | 5.07E-05 |
| ZNF154     | 19q13.43     | -0.330171782 | 6.37E-06 | 5.09E-05 |
| DEDD2      | 19q13.2      | 0.330142489  | 6.38E-06 | 5.1E-05  |
| ZNF559     | 19p13.2      | -0.330138305 | 6.39E-06 | 5.1E-05  |
| NRF1       | 7q32.2       | -0.330106919 | 6.4E-06  | 5.1E-05  |
| STAT5B     | 17q21.2      | -0.330065072 | 6.42E-06 | 5.12E-05 |
| BCL2L12    | 19q13.33     | 0.330060888  | 6.42E-06 | 5.12E-05 |
| APOBEC1    | 12p13.31     | 0.330042377  | 6.43E-06 | 5.12E-05 |
| DNAJC17    | 15q15.1      | 0.330037872  | 6.43E-06 | 5.12E-05 |
| RSPH4A     | 6q22.1       | -0.329994105 | 6.45E-06 | 5.13E-05 |
| GYS1       | 19q13.33     | 0.329973009  | 6.46E-06 | 5.14E-05 |
| FAM13C     | 10q21.1      | -0.329960454 | 6.46E-06 | 5.14E-05 |
| MYCT1      | 6q25.2       | -0.3299207   | 6.48E-06 | 5.15E-05 |
| ZNF727     | 7q11.21      | -0.329916744 | 6.48E-06 | 5.15E-05 |
| TSPAN3     | 15q24.3      | 0.329910238  | 6.49E-06 | 5.15E-05 |
| GOLGA2P1C  | 15q25.2      | 0.329822359  | 6.53E-06 | 5.18E-05 |
| KLHDC7B    | 22q13.33     | 0.329822359  | 6.53E-06 | 5.18E-05 |
| DDHD1      | 14q22.1      | -0.329818174 | 6.53E-06 | 5.18E-05 |
| SUGT1P4-S  | 9q22.33      | -0.329813989 | 6.53E-06 | 5.18E-05 |
| LY75       | 2q24.2       | 0.329803528  | 6.53E-06 | 5.18E-05 |
| BBS10      | 12q21.2      | -0.329797251 | 6.54E-06 | 5.18E-05 |
| PABPC5     | Xq21.31      | -0.329795158 | 6.54E-06 | 5.18E-05 |
| ARMC10     | 7q22.1       | 0.329782604  | 6.54E-06 | 5.18E-05 |
| CDHR2      | 5q35.2       | 0.329751219  | 6.56E-06 | 5.19E-05 |
| PMEPA1     | 20q13.31     | 0.329659155  | 6.6E-06  | 5.22E-05 |
| FANCA      | 16q24.3      | 0.329579646  | 6.63E-06 | 5.25E-05 |
| ZFYVE19    | 15q15.1      | 0.329562907  | 6.64E-06 | 5.25E-05 |
| ERG        | 21q22.2      | -0.329433181 | 6.7E-06  | 5.3E-05  |
| SLC35B4    | 7q33         | -0.329359948 | 6.73E-06 | 5.32E-05 |
| NACC1      | 19p13.13     | 0.329292993  | 6.77E-06 | 5.34E-05 |
| MAPK4      | 18q21.1-c    | -0.329244868 | 6.79E-06 | 5.36E-05 |
| ATP1A1-AS1 | 1p13.1       | -0.329163267 | 6.83E-06 | 5.39E-05 |
| NOL3       | 16q22.1      | 0.329138158  | 6.84E-06 | 5.39E-05 |
| TTC19      | 17p12        | -0.329129789 | 6.84E-06 | 5.39E-05 |
| RIMS1      | 6q13         | -0.32911059  | 6.85E-06 | 5.4E-05  |

|          |           |              |          |          |
|----------|-----------|--------------|----------|----------|
| ATG9B    | 7q36.1    | 0.329096311  | 6.86E-06 | 5.4E-05  |
| ZC3H14   | 14q31.3   | -0.329054464 | 6.88E-06 | 5.41E-05 |
| NAF1     | 4q32.2    | -0.328907999 | 6.94E-06 | 5.47E-05 |
| PDE3A    | 12p12.2   | -0.328884983 | 6.96E-06 | 5.47E-05 |
| RASD1    | 17p11.2   | -0.328878706 | 6.96E-06 | 5.47E-05 |
| OLFM1    | 9q34.3    | -0.328872429 | 6.96E-06 | 5.47E-05 |
| TADA3    | 3p25.3    | 0.32886406   | 6.97E-06 | 5.47E-05 |
| RAD51    | 15q15.1   | 0.328853598  | 6.97E-06 | 5.48E-05 |
| MSL2     | 3q22.3    | -0.328836859 | 6.98E-06 | 5.48E-05 |
| CHST10   | 2q11.2    | -0.328751072 | 7.02E-06 | 5.51E-05 |
| COX6B1   | 19q13.12  | 0.328742703  | 7.02E-06 | 5.51E-05 |
| CRACR2B  | 11p15.5   | 0.328725964  | 7.03E-06 | 5.52E-05 |
| EPHX2    | 8p21.2-p2 | -0.32870504  | 7.04E-06 | 5.52E-05 |
| NKIRAS1  | 3p24.2    | -0.32867784  | 7.05E-06 | 5.53E-05 |
| SCN3A    | 2q24.3    | -0.328654824 | 7.07E-06 | 5.53E-05 |
| HNRNPD   | 4q21.22   | 0.328652732  | 7.07E-06 | 5.53E-05 |
| STC2     | 5q35.2    | -0.328646455 | 7.07E-06 | 5.53E-05 |
| TNPO1    | 5q13.2    | -0.328623439 | 7.08E-06 | 5.54E-05 |
| CRHBP    | 5q13.3    | -0.328600805 | 7.09E-06 | 5.55E-05 |
| CYP2J2   | 1p32.1    | 0.328514636  | 7.13E-06 | 5.58E-05 |
| PIKFYVE  | 2q34      | -0.328470697 | 7.15E-06 | 5.59E-05 |
| SELENOW  | 19q13.33  | 0.328466512  | 7.16E-06 | 5.59E-05 |
| ZC3HAV1  | 7q34      | -0.328445588 | 7.17E-06 | 5.6E-05  |
| PSME1    | 14q12     | 0.328439311  | 7.17E-06 | 5.6E-05  |
| MAP3K11  | 11q13.1   | 0.328403741  | 7.19E-06 | 5.61E-05 |
| RBAK     | 7p22.1    | -0.328393279 | 7.19E-06 | 5.61E-05 |
| CALML4   | 15q23     | 0.328363986  | 7.21E-06 | 5.62E-05 |
| NUDT22   | 11q13.1   | 0.328317955  | 7.23E-06 | 5.64E-05 |
| IDS      | Xq28      | -0.328286569 | 7.24E-06 | 5.65E-05 |
| ABCA1    | 9q31.1    | -0.328263553 | 7.26E-06 | 5.65E-05 |
| MBTPS2   | Xp22.12   | -0.328253091 | 7.26E-06 | 5.65E-05 |
| OR10H1   | 19p13.12  | 0.328156167  | 7.31E-06 | 5.69E-05 |
| PSD4     | 2q14.1    | 0.328135919  | 7.32E-06 | 5.69E-05 |
| CAND2    | 3p25.2    | -0.328125458 | 7.32E-06 | 5.7E-05  |
| CALB2    | 16q22.2   | 0.328119181  | 7.33E-06 | 5.7E-05  |
| GPR135   | 14q23.1   | -0.328029209 | 7.37E-06 | 5.73E-05 |
| HTR1B    | 6q14.1    | 0.328022699  | 7.38E-06 | 5.73E-05 |
| AGRP     | 16q22.1   | 0.327995844  | 7.39E-06 | 5.74E-05 |
| OR2A7    | 7q35      | 0.327960162  | 7.41E-06 | 5.75E-05 |
| KCNT2    | 1q31.3    | -0.327932961 | 7.42E-06 | 5.76E-05 |
| CPLANE1  | 5p13.2    | -0.327920407 | 7.43E-06 | 5.76E-05 |
| ATP6V1G2 | 6p21.33   | -0.327861821 | 7.46E-06 | 5.78E-05 |
| EPN1     | 19q13.42  | 0.327855544  | 7.46E-06 | 5.78E-05 |
| SCAI     | 9q33.3    | -0.327790681 | 7.49E-06 | 5.8E-05  |
| ZNF518B  | 4p16.1    | -0.327640031 | 7.57E-06 | 5.86E-05 |
| PHTF2    | 7q11.23-c | -0.327617015 | 7.58E-06 | 5.87E-05 |
| C12ORF65 | 12q24.31  | -0.327449627 | 7.67E-06 | 5.93E-05 |
| NIT1     | 1q23.3    | 0.327414056  | 7.69E-06 | 5.95E-05 |
| NUP214   | 9q34.13   | -0.327330362 | 7.73E-06 | 5.98E-05 |
| LMNA     | 1q22      | 0.327326177  | 7.73E-06 | 5.98E-05 |
| GTF2B    | 1p22.2    | 0.327206913  | 7.79E-06 | 6.02E-05 |
| GPX3     | 5q33.1    | -0.327152512 | 7.82E-06 | 6.04E-05 |
| KIF1BP   | 10q22.1   | -0.32715042  | 7.82E-06 | 6.04E-05 |
| PPP1R12A | 12q21.2-c | -0.327135773 | 7.83E-06 | 6.04E-05 |



|           |           |              |          |          |
|-----------|-----------|--------------|----------|----------|
| RMDN3     | 15q15.1   | 0.327135773  | 7.83E-06 | 6.04E-05 |
| NATD1     | 17p11.2   | -0.327041617 | 7.88E-06 | 6.08E-05 |
| SULT1E1   | 4q13.3    | 0.327040295  | 7.88E-06 | 6.08E-05 |
| ACKR4     | 3q22.1    | 0.327022786  | 7.89E-06 | 6.08E-05 |
| ZFP1      | 16q23.1   | -0.326993493 | 7.91E-06 | 6.09E-05 |
| CBR1      | 21q22.12  | 0.326943276  | 7.93E-06 | 6.11E-05 |
| UBXN1     | 11q12.3   | 0.32689306   | 7.96E-06 | 6.13E-05 |
| LYSMD3    | 5q14.3    | -0.32684406  | 7.99E-06 | 6.15E-05 |
| ARHGAP24  | 4q21.23-c | -0.326800996 | 8.01E-06 | 6.16E-05 |
| SMUG1     | 12q13.13  | 0.326736133  | 8.05E-06 | 6.19E-05 |
| MYCBP2    | 13q22.3   | -0.326606407 | 8.12E-06 | 6.24E-05 |
| LOC730101 | 6p12.2    | -0.326602222 | 8.12E-06 | 6.24E-05 |
| SCN11A    | 3p22.2    | -0.326565947 | 8.14E-06 | 6.25E-05 |
| TSPYL2    | Xp11.22   | -0.32649342  | 8.18E-06 | 6.28E-05 |
| PELI1     | 2p14      | 0.326482958  | 8.19E-06 | 6.28E-05 |
| ZNF713    | 7p11.2    | -0.32641391  | 8.22E-06 | 6.31E-05 |
| WASF1     | 6q21      | -0.326355324 | 8.26E-06 | 6.33E-05 |
| EXOG      | 3p22.2    | -0.326338585 | 8.27E-06 | 6.33E-05 |
| CALM1     | 14q32.11  | -0.326288369 | 8.29E-06 | 6.35E-05 |
| ATPCKMT   | 5p15.2    | -0.32622769  | 8.33E-06 | 6.38E-05 |
| HIST1H3H  | 6p22.1    | 0.326216924  | 8.33E-06 | 6.38E-05 |
| IGF2R     | 6q25.3    | -0.326154458 | 8.37E-06 | 6.4E-05  |
| SUGT1     | 13q14.3   | 0.326083318  | 8.41E-06 | 6.43E-05 |
| SLITRK2   | Xq27.3    | -0.326082931 | 8.41E-06 | 6.43E-05 |
| HSPB8     | 12q24.23  | -0.325991254 | 8.46E-06 | 6.47E-05 |
| LOH12CR2  | 12p13.2   | -0.325968238 | 8.47E-06 | 6.47E-05 |
| SPAG17    | 1p12      | 0.325915053  | 8.5E-06  | 6.5E-05  |
| AKAP2     | 9q31.3    | -0.325889945 | 8.52E-06 | 6.5E-05  |
| ERCC6L2   | 9q22.32   | -0.325844789 | 8.55E-06 | 6.52E-05 |
| DAPP1     | 4q23      | 0.325809219  | 8.57E-06 | 6.53E-05 |
| CCSER2    | 10q23.1   | -0.325608353 | 8.68E-06 | 6.62E-05 |
| TRO       | Xp11.21   | -0.325581152 | 8.7E-06  | 6.63E-05 |
| PSMG3     | 7p22.3    | 0.32557069   | 8.7E-06  | 6.63E-05 |
| GNS       | 12q14.3   | -0.325560228 | 8.71E-06 | 6.63E-05 |
| TTC9C     | 11q12.3   | 0.32553512   | 8.73E-06 | 6.64E-05 |
| TUBB4B    | 9q34.3    | 0.325505827  | 8.74E-06 | 6.65E-05 |
| CHM       | Xq21.2    | -0.325468165 | 8.76E-06 | 6.67E-05 |
| RTL6      | 22q13.31  | -0.32539284  | 8.81E-06 | 6.7E-05  |
| GALNT12   | 9q22.33   | 0.325292407  | 8.87E-06 | 6.74E-05 |
| RFESD     | 5q15      | -0.32527776  | 8.88E-06 | 6.75E-05 |
| HOXC5     | 12q13.13  | 0.325255425  | 8.89E-06 | 6.75E-05 |
| SHPRH     | 6q24.3    | -0.325139665 | 8.96E-06 | 6.8E-05  |
| EFNA5     | 5q21.3    | 0.325122926  | 8.97E-06 | 6.81E-05 |
| ITGA9     | 3p22.2    | -0.325104095 | 8.98E-06 | 6.82E-05 |
| ARMC4     | 10p12.1   | -0.325093031 | 8.99E-06 | 6.82E-05 |
| HSP90B3P  | 1p22.1    | -0.325081079 | 9E-06    | 6.82E-05 |
| NCBP3     | 17p13.2   | -0.325070617 | 9E-06    | 6.82E-05 |
| YPEL1     | 22q11.21- | -0.324855104 | 9.13E-06 | 6.92E-05 |
| TOP1MT    | 8q24.3    | 0.32481535   | 9.16E-06 | 6.94E-05 |
| NDOR1     | 9q34.3    | 0.324783964  | 9.18E-06 | 6.95E-05 |
| NUTM2D    | 10q23.2   | -0.324767225 | 9.19E-06 | 6.95E-05 |
| HOXB9     | 17q21.32  | 0.324733917  | 9.21E-06 | 6.96E-05 |
| CUBN      | 10p13     | -0.324733748 | 9.21E-06 | 6.96E-05 |
| PLXNC1    | 12q22     | -0.324717009 | 9.22E-06 | 6.97E-05 |

|            |            |               |           |           |
|------------|------------|---------------|-----------|-----------|
| TNKS       | 8p23. 1    | -0. 324689808 | 9. 23E-06 | 6. 97E-05 |
| CLK2       | 1q22       | 0. 324687716  | 9. 24E-06 | 6. 97E-05 |
| GNG7       | 19p13. 3   | -0. 324685623 | 9. 24E-06 | 6. 97E-05 |
| CHRD1      | Xq23       | -0. 324677254 | 9. 24E-06 | 6. 98E-05 |
| LINC00574  | 6q27       | -0. 324619808 | 9. 28E-06 | 7E-05     |
| LINC00887  | 3q29       | 0. 324569667  | 9. 31E-06 | 7. 02E-05 |
| MAP4K4     | 2q11. 2    | 0. 324539158  | 9. 33E-06 | 7. 03E-05 |
| PMM1       | 22q13. 2   | -0. 324488942 | 9. 36E-06 | 7. 05E-05 |
| MAMLD1     | Xq28       | -0. 324465926 | 9. 37E-06 | 7. 06E-05 |
| IL1A       | 2q14. 1    | 0. 324454507  | 9. 38E-06 | 7. 07E-05 |
| MRS2       | 6p22. 3    | -0. 324434541 | 9. 39E-06 | 7. 07E-05 |
| C16ORF74   | 16q24. 1   | 0. 324378047  | 9. 43E-06 | 7. 1E-05  |
| ZNF322     | 6p22. 2    | -0. 324277614 | 9. 49E-06 | 7. 14E-05 |
| RAB33B     | 4q31. 1    | -0. 324269244 | 9. 5E-06  | 7. 14E-05 |
| ADAMTS18   | 16q23. 1   | -0. 324244984 | 9. 51E-06 | 7. 15E-05 |
| GAPDH      | 12p13. 31  | 0. 324227397  | 9. 53E-06 | 7. 16E-05 |
| MRPL14     | 6p21. 1    | 0. 324131149  | 9. 59E-06 | 7. 2E-05  |
| SMOX       | 20p13      | 0. 324089302  | 9. 61E-06 | 7. 22E-05 |
| SPINT2     | 19q13. 2   | 0. 324066286  | 9. 63E-06 | 7. 23E-05 |
| CSGALNACT1 | 8p21. 3    | -0. 324039085 | 9. 65E-06 | 7. 24E-05 |
| DOC2B      | 17p13. 3   | -0. 323995146 | 9. 67E-06 | 7. 26E-05 |
| B3GNT7     | 2q37. 1 2c | 0. 323980499  | 9. 68E-06 | 7. 26E-05 |
| SFRP1      | 8p11. 21   | -0. 323905174 | 9. 73E-06 | 7. 29E-05 |
| DNAAF2     | 14q21. 3   | -0. 323880066 | 9. 75E-06 | 7. 3E-05  |
| MTA2       | 11q12. 3   | 0. 323758709  | 9. 83E-06 | 7. 36E-05 |
| DOCK5      | 8p21. 2    | 0. 323741971  | 9. 84E-06 | 7. 37E-05 |
| HIST1H2AC  | 6p22. 2    | 0. 323681292  | 9. 88E-06 | 7. 39E-05 |
| PDCD6IP    | 3p22. 3    | 0. 323677108  | 9. 88E-06 | 7. 39E-05 |
| UBE2C      | 20q13. 12  | 0. 323677108  | 9. 88E-06 | 7. 39E-05 |
| EFNA2      | 19p13. 3   | 0. 32366604   | 9. 89E-06 | 7. 39E-05 |
| UBC        | 12q24. 31  | 0. 323637353  | 9. 91E-06 | 7. 4E-05  |
| IL6ST      | 5q11. 2    | -0. 323576674 | 9. 95E-06 | 7. 43E-05 |
| LYPD6B     | 2q23. 2    | 0. 323574582  | 9. 95E-06 | 7. 43E-05 |
| HSD17B11   | 4q22. 1    | 0. 323559936  | 9. 96E-06 | 7. 43E-05 |
| IGFL3      | 19q13. 32  | 0. 323516924  | 9. 99E-06 | 7. 45E-05 |
| RPL17      | 18q21. 1   | -0. 323486703 | 1E-05     | 7. 46E-05 |
| EYS        | 6q12       | -0. 32346578  | 1E-05     | 7. 47E-05 |
| TPH2       | 12q21. 1   | -0. 32333825  | 1. 01E-05 | 7. 53E-05 |
| SLC6A20    | 3p21. 31   | 0. 323336223  | 1. 01E-05 | 7. 53E-05 |
| SPTB       | 14q23. 3   | -0. 323252359 | 1. 02E-05 | 7. 57E-05 |
| RIOK1      | 6p24. 3    | -0. 323220974 | 1. 02E-05 | 7. 58E-05 |
| MAP7D3     | Xq26. 3    | -0. 323220974 | 1. 02E-05 | 7. 58E-05 |
| ORAI2      | 7q22. 1    | -0. 323214697 | 1. 02E-05 | 7. 58E-05 |
| ARL13B     | 3q11. 1-q1 | -0. 323202143 | 1. 02E-05 | 7. 58E-05 |
| TIFA       | 4q25       | -0. 323185404 | 1. 02E-05 | 7. 59E-05 |
| PPP4R1     | 18p11. 22  | 0. 323101709  | 1. 03E-05 | 7. 63E-05 |
| IGFBP3     | 7p12. 3    | 0. 323074509  | 1. 03E-05 | 7. 64E-05 |
| ZNF737     | 19p12      | -0. 323005461 | 1. 03E-05 | 7. 67E-05 |
| SERPINB7   | 18q21. 33  | 0. 322969398  | 1. 04E-05 | 7. 69E-05 |
| MGMT       | 10q26. 3   | 0. 32295106   | 1. 04E-05 | 7. 69E-05 |
| PRSS53     | 16p11. 2   | 0. 322946875  | 1. 04E-05 | 7. 69E-05 |
| TRIM58     | 1q44       | -0. 32292872  | 1. 04E-05 | 7. 7E-05  |
| STXBPL5L   | 3q13. 33   | -0. 322881177 | 1. 04E-05 | 7. 72E-05 |
| TMEM191A   | 22q11. 21  | 0. 322762748  | 1. 05E-05 | 7. 78E-05 |

|          |          |              |          |          |
|----------|----------|--------------|----------|----------|
| SCT      | 11p15.5  | 0.32272927   | 1.05E-05 | 7.8E-05  |
| FBX048   | 2p13.3   | -0.322710439 | 1.05E-05 | 7.8E-05  |
| CELF2    | 10p14    | -0.322704162 | 1.05E-05 | 7.8E-05  |
| TXNDC17  | 17p13.1  | 0.322683238  | 1.06E-05 | 7.81E-05 |
| AP3M1    | 10q22.2  | -0.322681146 | 1.06E-05 | 7.81E-05 |
| ATP8A2   | 13q12.13 | -0.322662315 | 1.06E-05 | 7.82E-05 |
| TTYH2    | 17q25.1  | -0.322582805 | 1.06E-05 | 7.85E-05 |
| SNAPIN   | 1q21.3   | 0.322574436  | 1.06E-05 | 7.85E-05 |
| LHFPL1   | Xq23     | -0.322570991 | 1.06E-05 | 7.85E-05 |
| GSDMD    | 8q24.3   | 0.322570251  | 1.06E-05 | 7.85E-05 |
| AN08     | 19p13.11 | 0.322566066  | 1.06E-05 | 7.85E-05 |
| FOCAD    | 9p21.3   | -0.322526311 | 1.07E-05 | 7.87E-05 |
| SORD     | 15q21.1  | 0.322509573  | 1.07E-05 | 7.88E-05 |
| ZNF347   | 19q13.42 | -0.322494926 | 1.07E-05 | 7.88E-05 |
| SNTG2    | 2p25.3   | -0.322449298 | 1.07E-05 | 7.9E-05  |
| RTN1     | 14q23.1  | -0.322421694 | 1.07E-05 | 7.91E-05 |
| MAML3    | 4q31.1   | -0.322411232 | 1.08E-05 | 7.92E-05 |
| SPOCK2   | 10q22.1  | -0.322369385 | 1.08E-05 | 7.93E-05 |
| NMI      | 2q23.3   | 0.32235683   | 1.08E-05 | 7.94E-05 |
| ST13     | 22q13.2  | -0.322335907 | 1.08E-05 | 7.95E-05 |
| LPIN3    | 20q12    | 0.32229406   | 1.08E-05 | 7.97E-05 |
| MUS81    | 11q13.1  | 0.322264767  | 1.09E-05 | 7.98E-05 |
| ZDHHC12  | 9q34.11  | 0.322256397  | 1.09E-05 | 7.98E-05 |
| RHOA     | 3p21.31  | 0.322254305  | 1.09E-05 | 7.98E-05 |
| CLUL1    | 18p11.32 | -0.322254067 | 1.09E-05 | 7.98E-05 |
| DNAJC16  | 1p36.21  | -0.322227104 | 1.09E-05 | 7.99E-05 |
| SACS     | 13q12.12 | -0.322197811 | 1.09E-05 | 8E-05    |
| GPM6B    | Xp22.2   | -0.322193627 | 1.09E-05 | 8E-05    |
| PIGN     | 18q21.33 | -0.322189442 | 1.09E-05 | 8E-05    |
| EXOC2    | 6p25.3   | -0.322124579 | 1.1E-05  | 8.03E-05 |
| CACNA1D  | 3p21.1   | -0.322049254 | 1.1E-05  | 8.07E-05 |
| TCIRG1   | 11q13.2  | 0.321994853  | 1.11E-05 | 8.09E-05 |
| MXD4     | 4p16.3   | -0.321986483 | 1.11E-05 | 8.09E-05 |
| CCDC65   | 12q13.12 | -0.321942712 | 1.11E-05 | 8.11E-05 |
| KIAA1109 | 4q27     | -0.321940452 | 1.11E-05 | 8.11E-05 |
| CYP39A1  | 6p12.3   | -0.321938359 | 1.11E-05 | 8.11E-05 |
| NECTIN2  | 19q13.32 | 0.321902789  | 1.11E-05 | 8.13E-05 |
| TUBE1    | 6q21     | -0.321844203 | 1.12E-05 | 8.16E-05 |
| SETX     | 9q34.13  | -0.321827464 | 1.12E-05 | 8.16E-05 |
| SOGA3    | 6q22.33  | -0.321827464 | 1.12E-05 | 8.16E-05 |
| RGS7BP   | 5q12.3   | -0.321791894 | 1.12E-05 | 8.18E-05 |
| PSPH     | 7p11.2   | -0.321733308 | 1.12E-05 | 8.2E-05  |
| MGST2    | 4q31.1   | 0.321706108  | 1.13E-05 | 8.22E-05 |
| GRK3     | 22q12.1  | -0.321651706 | 1.13E-05 | 8.24E-05 |
| DCLRE1A  | 10q25.3  | -0.321630783 | 1.13E-05 | 8.25E-05 |
| TMEM102  | 17p13.1  | 0.321526165  | 1.14E-05 | 8.31E-05 |
| ZNF43    | 19p12    | -0.321507334 | 1.14E-05 | 8.31E-05 |
| ZFP2     | 5q35.3   | -0.321495994 | 1.14E-05 | 8.32E-05 |
| SYNGR1   | 22q13.1  | -0.321465487 | 1.14E-05 | 8.33E-05 |
| OSTM1    | 6q21     | -0.321448748 | 1.15E-05 | 8.34E-05 |
| KLHL2    | 4q32.3   | -0.321312745 | 1.16E-05 | 8.41E-05 |
| SYT11    | 1q22     | -0.321285544 | 1.16E-05 | 8.42E-05 |
| GYG1     | 3q24     | -0.321268805 | 1.16E-05 | 8.43E-05 |
| ZWINT    | 10q21.1  | 0.321266713  | 1.16E-05 | 8.43E-05 |

|           |           |              |          |          |
|-----------|-----------|--------------|----------|----------|
| PTPRM     | 18p11.23  | -0.321247881 | 1.16E-05 | 8.43E-05 |
| LAMP2     | Xq24      | -0.321197665 | 1.17E-05 | 8.46E-05 |
| ELOB      | 16p13.3   | 0.321099324  | 1.17E-05 | 8.51E-05 |
| PATL1     | 11q12.1   | 0.321063754  | 1.18E-05 | 8.53E-05 |
| RTTN      | 18q22.2   | -0.321053292 | 1.18E-05 | 8.53E-05 |
| ELF2      | 4q31.1    | -0.321044923 | 1.18E-05 | 8.53E-05 |
| EMCN      | 4q24      | -0.320871257 | 1.19E-05 | 8.63E-05 |
| ITGAE     | 17p13.2   | -0.320852426 | 1.19E-05 | 8.63E-05 |
| CLSTN3    | 12p13.31  | -0.320785471 | 1.2E-05  | 8.67E-05 |
| IRAK4     | 12q12     | -0.320754085 | 1.2E-05  | 8.68E-05 |
| MAPK8IP1  | 11p11.2   | -0.320745716 | 1.2E-05  | 8.69E-05 |
| C20RF42   | 2p13.3    | -0.320716423 | 1.2E-05  | 8.7E-05  |
| USP9X     | Xp11.4    | -0.320708053 | 1.2E-05  | 8.7E-05  |
| NSUN5     | 7q11.23   | 0.320680853  | 1.21E-05 | 8.71E-05 |
| ADAM28    | 8p21.2    | 0.32065156   | 1.21E-05 | 8.73E-05 |
| LINC02447 | 4p16.1    | -0.320645283 | 1.21E-05 | 8.73E-05 |
| ZNF394    | 7q22.1    | 0.32057205   | 1.21E-05 | 8.77E-05 |
| ZNF835    | 19q13.43  | -0.320465675 | 1.22E-05 | 8.83E-05 |
| ITGA2     | 5q11.2    | 0.320419308  | 1.23E-05 | 8.85E-05 |
| TTC28     | 22q12.1   | -0.320417216 | 1.23E-05 | 8.85E-05 |
| IFNGR2    | 21q22.11  | 0.320329337  | 1.23E-05 | 8.9E-05  |
| SSH1      | 12q24.11  | -0.320266566 | 1.24E-05 | 8.93E-05 |
| EIF3L     | 22q13.1   | -0.320264474 | 1.24E-05 | 8.93E-05 |
| PKHD1L1   | 8q23.1-q2 | -0.320190657 | 1.25E-05 | 8.97E-05 |
| GALNT16   | 14q24.1   | -0.320067792 | 1.26E-05 | 9.04E-05 |
| PPP1R35   | 7q22.1    | 0.320061515  | 1.26E-05 | 9.04E-05 |
| ENHO      | 9p13.3    | -0.320033436 | 1.26E-05 | 9.05E-05 |
| MUC4      | 3q29      | 0.319961082  | 1.26E-05 | 9.09E-05 |
| RAB5IF    | 20q11.23  | 0.31981671   | 1.28E-05 | 9.18E-05 |
| KIF1A     | 2q37.3    | -0.319764401 | 1.28E-05 | 9.2E-05  |
| DPH1      | 17p13.3   | -0.319753939 | 1.28E-05 | 9.21E-05 |
| SERTAD1   | 19q13.2   | 0.319741385  | 1.28E-05 | 9.21E-05 |
| TST       | 22q12.3   | 0.319733015  | 1.28E-05 | 9.21E-05 |
| NOL9      | 1p36.31   | -0.319638859 | 1.29E-05 | 9.27E-05 |
| BCL2      | 18q21.33  | -0.319626305 | 1.29E-05 | 9.27E-05 |
| CCDC88B   | 11q13.1   | 0.319615843  | 1.29E-05 | 9.27E-05 |
| DPY30     | 2p22.3    | 0.319496579  | 1.3E-05  | 9.34E-05 |
| ARL15     | 5q11.2    | -0.319492394 | 1.3E-05  | 9.34E-05 |
| TM6SF2    | 19p13.11  | 0.319463268  | 1.31E-05 | 9.36E-05 |
| CDH5      | 16q21     | -0.319458917 | 1.31E-05 | 9.36E-05 |
| CCDC93    | 2q14.1    | -0.319383592 | 1.31E-05 | 9.4E-05  |
| DUSP19    | 2q32.1    | -0.319377315 | 1.31E-05 | 9.4E-05  |
| MOAP1     | 14q32.12  | -0.319318729 | 1.32E-05 | 9.43E-05 |
| ADSS      | 1q44      | 0.319314544  | 1.32E-05 | 9.43E-05 |
| TCF7L2    | 10q25.2-c | 0.319281066  | 1.32E-05 | 9.45E-05 |
| GINM1     | 6q25.1    | -0.319264327 | 1.32E-05 | 9.46E-05 |
| GTF2E2    | 8p12      | 0.319216203  | 1.33E-05 | 9.48E-05 |
| C11ORF58  | 11p15.2   | -0.319178541 | 1.33E-05 | 9.5E-05  |
| MGA       | 15q15.1   | -0.319071831 | 1.34E-05 | 9.57E-05 |
| HERPUD1   | 16q13     | -0.31897349  | 1.35E-05 | 9.63E-05 |
| APOL2     | 22q12.3   | 0.318958843  | 1.35E-05 | 9.63E-05 |
| FLOT2     | 17q11.2   | 0.318952566  | 1.35E-05 | 9.63E-05 |
| SCRN1     | 7p14.3    | -0.318908627 | 1.36E-05 | 9.66E-05 |
| RNF38     | 9p13.2    | -0.31889398  | 1.36E-05 | 9.66E-05 |

|           |           |               |           |           |
|-----------|-----------|---------------|-----------|-----------|
| KIF6      | 6p21. 2   | -0. 318876362 | 1. 36E-05 | 9. 67E-05 |
| SYNJ2     | 6q25. 3   | -0. 318833302 | 1. 36E-05 | 9. 7E-05  |
| PLS1      | 3q23      | 0. 318766347  | 1. 37E-05 | 9. 73E-05 |
| RNF4      | 4p16. 3   | -0. 318691022 | 1. 37E-05 | 9. 78E-05 |
| S100A4    | 1q21. 3   | 0. 318626159  | 1. 38E-05 | 9. 82E-05 |
| TGFBR3    | 1p22. 1   | -0. 31857385  | 1. 39E-05 | 9. 85E-05 |
| HOXB3     | 17q21. 32 | 0. 318559203  | 1. 39E-05 | 9. 85E-05 |
| FRRS1L    | 9q31. 3   | -0. 318552944 | 1. 39E-05 | 9. 85E-05 |
| KCTD1     | 18q11. 2  | 0. 318433662  | 1. 4E-05  | 9. 93E-05 |
| SLX4IP    | 20p12. 2  | -0. 318416923 | 1. 4E-05  | 9. 94E-05 |
| FAM13B    | 5q31. 2   | -0. 318389722 | 1. 4E-05  | 9. 95E-05 |
| TRABD     | 22q13. 33 | 0. 318324859  | 1. 41E-05 | 9. 99E-05 |
| CCDC12    | 3p21. 31  | 0. 318291382  | 1. 41E-05 | 0. 0001   |
| C11ORF68  | 11q13. 1  | 0. 318253719  | 1. 41E-05 | 0. 0001   |
| KLF13     | 15q13. 3  | -0. 318241165 | 1. 42E-05 | 0. 0001   |
| KIAA1522  | 1p35. 1   | 0. 318216057  | 1. 42E-05 | 0. 0001   |
| KLRG1     | 12p13. 31 | -0. 318195133 | 1. 42E-05 | 0. 000101 |
| GRHL1     | 2p25. 1   | 0. 318161655  | 1. 42E-05 | 0. 000101 |
| ZBED3-AS1 | 5q13. 3   | -0. 318126085 | 1. 43E-05 | 0. 000101 |
| SYNRG     | 17q12     | -0. 318034022 | 1. 44E-05 | 0. 000102 |
| PGGHG     | 11p15. 5  | 0. 318021468  | 1. 44E-05 | 0. 000102 |
| RNF41     | 12q13. 3  | -0. 317927312 | 1. 45E-05 | 0. 000102 |
| GABARAPL1 | 12p13. 2  | -0. 317902203 | 1. 45E-05 | 0. 000102 |
| RNF115    | 1q21. 1   | -0. 317883372 | 1. 45E-05 | 0. 000102 |
| SLC17A9   | 20q13. 33 | 0. 31781014   | 1. 46E-05 | 0. 000103 |
| MCOLN3    | 1p22. 3   | -0. 317768292 | 1. 46E-05 | 0. 000103 |
| SLC2A4RG  | 20q13. 33 | 0. 317759923  | 1. 46E-05 | 0. 000103 |
| RPP25     | 15q24. 2  | 0. 317709706  | 1. 47E-05 | 0. 000103 |
| DCTN5     | 16p12. 2  | 0. 317688783  | 1. 47E-05 | 0. 000104 |
| VAMP2     | 17p13. 1  | -0. 317672044 | 1. 47E-05 | 0. 000104 |
| POLR3H    | 22q13. 2  | -0. 317653213 | 1. 47E-05 | 0. 000104 |
| IFITM2    | 11p15. 5  | 0. 317649028  | 1. 47E-05 | 0. 000104 |
| MRGBP     | 20q13. 33 | 0. 317613458  | 1. 48E-05 | 0. 000104 |
| API5      | 11p12     | -0. 317556964 | 1. 48E-05 | 0. 000104 |
| ARF1      | 1q42. 13  | 0. 317550687  | 1. 48E-05 | 0. 000104 |
| FKTN      | 9q31. 2   | -0. 317548595 | 1. 48E-05 | 0. 000104 |
| GNAO1     | 16q13     | -0. 317506748 | 1. 49E-05 | 0. 000104 |
| CCNB2     | 15q22. 2  | 0. 317460716  | 1. 49E-05 | 0. 000105 |
| ARHGEF15  | 17p13. 1  | -0. 317456531 | 1. 49E-05 | 0. 000105 |
| PRSS12    | 4q26      | 0. 317427238  | 1. 49E-05 | 0. 000105 |
| PHYHIP1L  | 10q21. 1  | -0. 317349821 | 1. 5E-05  | 0. 000105 |
| PPFIA4    | 1q32. 1   | 0. 317282866  | 1. 51E-05 | 0. 000106 |
| ZNF454    | 5q35. 3   | -0. 317000398 | 1. 54E-05 | 0. 000108 |
| TRIM39    | 6p22. 1   | -0. 316954366 | 1. 54E-05 | 0. 000108 |
| ZG16B     | 16p13. 3  | 0. 316891595  | 1. 55E-05 | 0. 000108 |
| MTUS2     | 13q12. 3  | -0. 316826732 | 1. 55E-05 | 0. 000109 |
| STARD7    | 2q11. 2   | -0. 31678907  | 1. 56E-05 | 0. 000109 |
| ALG3      | 3q27. 1   | 0. 316774423  | 1. 56E-05 | 0. 000109 |
| ATP9A     | 20q13. 2  | -0. 316774423 | 1. 56E-05 | 0. 000109 |
| THNSL1    | 10p12. 1  | -0. 316766054 | 1. 56E-05 | 0. 000109 |
| TBPL1     | 6q23. 2   | -0. 316759777 | 1. 56E-05 | 0. 000109 |
| UPRT      | Xq13. 3   | -0. 316743038 | 1. 56E-05 | 0. 000109 |
| PAX8      | 2q14. 1   | 0. 316741111  | 1. 56E-05 | 0. 000109 |
| IGFL1     | 19q13. 32 | 0. 316734453  | 1. 56E-05 | 0. 000109 |

|           |            |               |           |           |
|-----------|------------|---------------|-----------|-----------|
| MPPED2    | 11p14. 1   | -0. 316728391 | 1. 56E-05 | 0. 000109 |
| GDPD1     | 17q22      | -0. 316692987 | 1. 57E-05 | 0. 000109 |
| STX19     | 3q11. 2    | 0. 316677294  | 1. 57E-05 | 0. 000109 |
| MYOF      | 10q23. 33  | 0. 316636327  | 1. 57E-05 | 0. 00011  |
| BAIAP2L2  | 22q13. 1   | 0. 316600757  | 1. 58E-05 | 0. 00011  |
| USP43     | 17p13. 1   | 0. 316571464  | 1. 58E-05 | 0. 00011  |
| CARD10    | 22q13. 1   | 0. 316540079  | 1. 58E-05 | 0. 00011  |
| C8ORF48   | 8p22       | -0. 316504509 | 1. 59E-05 | 0. 000111 |
| FTO       | 16q12. 2   | -0. 316500324 | 1. 59E-05 | 0. 000111 |
| AZI2      | 3p24. 1    | -0. 31646057  | 1. 59E-05 | 0. 000111 |
| HIST1H2BC | 6p22. 1    | 0. 316435293  | 1. 59E-05 | 0. 000111 |
| CMA1      | 14q12      | -0. 316338435 | 1. 6E-05  | 0. 000112 |
| TMEM254-A | 10q22. 3   | -0. 31633712  | 1. 6E-05  | 0. 000112 |
| SCPEP1    | 17q22      | -0. 316303643 | 1. 61E-05 | 0. 000112 |
| ALDH9A1   | 1q24. 1    | -0. 316278535 | 1. 61E-05 | 0. 000112 |
| SLC35F1   | 6q22. 2-q2 | -0. 316247315 | 1. 61E-05 | 0. 000112 |
| CORO2B    | 15q23      | -0. 316247149 | 1. 61E-05 | 0. 000112 |
| S100A3    | 1q21. 3    | 0. 31623041   | 1. 61E-05 | 0. 000112 |
| ALOX15    | 17p13. 2   | -0. 316212519 | 1. 62E-05 | 0. 000112 |
| NEURL1    | 10q24. 33  | -0. 316176009 | 1. 62E-05 | 0. 000112 |
| DDX39A    | 19p13. 12  | 0. 316176009  | 1. 62E-05 | 0. 000112 |
| LCA5L     | 21q22. 2   | -0. 316156959 | 1. 62E-05 | 0. 000113 |
| IPO13     | 1p34. 1    | -0. 316096499 | 1. 63E-05 | 0. 000113 |
| RRAGD     | 6q15       | -0. 316075576 | 1. 63E-05 | 0. 000113 |
| TNFRSF14  | 1p36. 32   | 0. 316063022  | 1. 63E-05 | 0. 000113 |
| HAUS6     | 9p22. 1    | -0. 316021175 | 1. 64E-05 | 0. 000113 |
| UNC13A    | 19p13. 11  | -0. 316014898 | 1. 64E-05 | 0. 000113 |
| HIST3H2A  | 1q42. 13   | 0. 315958404  | 1. 64E-05 | 0. 000114 |
| SYMPK     | 19q13. 32  | 0. 315924926  | 1. 65E-05 | 0. 000114 |
| SOAT1     | 1q25. 2    | -0. 31586634  | 1. 65E-05 | 0. 000114 |
| ACRBP     | 12p13. 31  | -0. 315864248 | 1. 65E-05 | 0. 000114 |
| MSX2      | 5q35. 2    | 0. 315747076  | 1. 67E-05 | 0. 000115 |
| ZNF641    | 12q13. 11  | -0. 315738707 | 1. 67E-05 | 0. 000115 |
| TONSL     | 8q24. 3    | 0. 315736614  | 1. 67E-05 | 0. 000115 |
| ABCA9     | 17q24. 2   | -0. 315673843 | 1. 67E-05 | 0. 000116 |
| RELN      | 7q22. 1    | -0. 31560898  | 1. 68E-05 | 0. 000116 |
| ZBTB14    | 18p11. 31  | -0. 315606888 | 1. 68E-05 | 0. 000116 |
| UTRN      | 6q24. 2    | -0. 315514824 | 1. 69E-05 | 0. 000117 |
| SCO1      | 17p13. 1   | -0. 315508712 | 1. 69E-05 | 0. 000117 |
| MX1       | 21q22. 3   | 0. 315504363  | 1. 69E-05 | 0. 000117 |
| ARHGEF35  | 7q35       | 0. 315498085  | 1. 69E-05 | 0. 000117 |
| TMEM63B   | 6p21. 1    | 0. 315435315  | 1. 7E-05  | 0. 000117 |
| RINT1     | 7q22. 3    | -0. 315391375 | 1. 71E-05 | 0. 000117 |
| SBN01     | 12q24. 31  | -0. 315336974 | 1. 71E-05 | 0. 000118 |
| ZBTB6     | 9q33. 2    | -0. 315320235 | 1. 71E-05 | 0. 000118 |
| KL        | 13q13. 1   | -0. 315265834 | 1. 72E-05 | 0. 000118 |
| UBE3D     | 6q14. 1    | -0. 31521771  | 1. 72E-05 | 0. 000119 |
| MYOM3     | 1p36. 11   | 0. 315175863  | 1. 73E-05 | 0. 000119 |
| BRD2      | 6p21. 32   | -0. 315094261 | 1. 74E-05 | 0. 000119 |
| ZNF674    | Xp11. 3    | -0. 315083799 | 1. 74E-05 | 0. 000119 |
| BOD1L1    | 4p15. 33   | -0. 315060783 | 1. 74E-05 | 0. 00012  |
| PRDM11    | 11p11. 2   | -0. 314998012 | 1. 75E-05 | 0. 00012  |
| PCDH9     | 13q21. 32  | -0. 314964535 | 1. 75E-05 | 0. 00012  |
| VAT1L     | 16q23. 1   | -0. 314935406 | 1. 76E-05 | 0. 00012  |

|           |           |              |          |          |
|-----------|-----------|--------------|----------|----------|
| CEP126    | 11q22.1   | -0.31491641  | 1.76E-05 | 0.000121 |
| SLC35A2   | Xp11.23   | 0.314885025  | 1.76E-05 | 0.000121 |
| KIFC1     | 6p21.32   | 0.314684159  | 1.79E-05 | 0.000122 |
| HSF5      | 17q22     | -0.31468371  | 1.79E-05 | 0.000122 |
| TRUB1     | 10q25.3   | -0.314602557 | 1.79E-05 | 0.000123 |
| RND2      | 17q21.31  | -0.314554597 | 1.8E-05  | 0.000123 |
| KHDC1     | 6q13      | 0.314531193  | 1.8E-05  | 0.000123 |
| PPP1R16B  | 20q11.23  | -0.314460277 | 1.81E-05 | 0.000124 |
| WDFY3     | 4q21.23   | -0.314437261 | 1.81E-05 | 0.000124 |
| TXNDC5    | 6p24.3    | -0.314430984 | 1.81E-05 | 0.000124 |
| MRPS12    | 19q13.2   | 0.314395414  | 1.82E-05 | 0.000124 |
| RXRA      | 9q34.2    | -0.314313812 | 1.83E-05 | 0.000125 |
| PCDHA1    | 5q31.3    | -0.3143088   | 1.83E-05 | 0.000125 |
| HSPA4L    | 4q28.1    | -0.314307535 | 1.83E-05 | 0.000125 |
| FBXW11    | 5q35.1    | -0.31430335  | 1.83E-05 | 0.000125 |
| DNAL1     | 14q24.3   | -0.314265687 | 1.83E-05 | 0.000125 |
| CHL1      | 3p26.3    | -0.31422384  | 1.84E-05 | 0.000125 |
| PLA1A     | 3q13.33   | -0.314079468 | 1.86E-05 | 0.000127 |
| NR2C2     | 3p25.1    | -0.314050175 | 1.86E-05 | 0.000127 |
| LASP1     | 17q12     | 0.313972758  | 1.87E-05 | 0.000127 |
| ATM       | 11q22.3   | -0.313964388 | 1.87E-05 | 0.000127 |
| ARL6IP1   | 16p12.3   | 0.313941372  | 1.87E-05 | 0.000127 |
| AKNA      | 9q32      | -0.313937187 | 1.87E-05 | 0.000127 |
| SH3TC2    | 5q32      | 0.313909987  | 1.88E-05 | 0.000128 |
| ANKRD17   | 4q13.3    | -0.313836754 | 1.89E-05 | 0.000128 |
| ZNF451    | 6p12.1    | -0.3138242   | 1.89E-05 | 0.000128 |
| ADGRL4    | 1p31.1    | -0.313807461 | 1.89E-05 | 0.000128 |
| GP6       | 19q13.42  | 0.31378582   | 1.89E-05 | 0.000129 |
| PNKP      | 19q13.33  | 0.313744691  | 1.9E-05  | 0.000129 |
| CDC25C    | 5q31.2    | 0.313690289  | 1.9E-05  | 0.000129 |
| ZNRD2     | 11q13.1   | 0.313621242  | 1.91E-05 | 0.00013  |
| RADX      | Xq22.3    | -0.313589856 | 1.92E-05 | 0.00013  |
| SAMD15    | 14q24.3   | -0.313568933 | 1.92E-05 | 0.00013  |
| MIR600HG  | 9q33.3    | -0.313470592 | 1.93E-05 | 0.000131 |
| TMEM53    | 1p34.1    | 0.313430837  | 1.94E-05 | 0.000131 |
| CASTOR2   | 7q11.23   | -0.313393339 | 1.94E-05 | 0.000131 |
| MED9      | 17p11.2   | -0.313316968 | 1.95E-05 | 0.000132 |
| AP5M1     | 14q22.3   | -0.313196493 | 1.97E-05 | 0.000133 |
| AKAP10    | 17p11.2   | -0.313173477 | 1.97E-05 | 0.000133 |
| RAB11FIP2 | 10q26.11  | -0.313163016 | 1.97E-05 | 0.000133 |
| PNPLA3    | 22q13.31  | 0.313137453  | 1.97E-05 | 0.000133 |
| CNKSR2    | Xp22.12   | -0.313115546 | 1.98E-05 | 0.000134 |
| OSBPL10   | 3p23      | 0.313012366  | 1.99E-05 | 0.000134 |
| ANKRD9    | 14q32.31  | 0.312991442  | 1.99E-05 | 0.000135 |
| NEU1      | 6p21.33   | -0.312914025 | 2E-05    | 0.000135 |
| WDR17     | 4q34.2    | -0.31291105  | 2E-05    | 0.000135 |
| BAK1      | 6p21.31   | 0.312899379  | 2E-05    | 0.000135 |
| DNMBP-AS1 | 10q24.2   | 0.312865352  | 2.01E-05 | 0.000135 |
| CAMTA2    | 17p13.2   | -0.312736175 | 2.02E-05 | 0.000137 |
| HSPB1P1   | 9q21.13   | 0.31273199   | 2.02E-05 | 0.000137 |
| INSIG2    | 2q14.1-q1 | 0.312704789  | 2.03E-05 | 0.000137 |
| NRBP2     | 8q24.3    | 0.312704789  | 2.03E-05 | 0.000137 |
| AQP7      | 9p13.3    | -0.31269642  | 2.03E-05 | 0.000137 |
| ADCK5     | 8q24.3    | 0.312637834  | 2.04E-05 | 0.000137 |

|           |            |               |           |           |
|-----------|------------|---------------|-----------|-----------|
| UBIAD1    | 1p36. 22   | -0. 312633649 | 2. 04E-05 | 0. 000137 |
| ZFP69B    | 1p34. 2    | -0. 312627536 | 2. 04E-05 | 0. 000137 |
| ZC3H12C   | 11q22. 3   | -0. 312612726 | 2. 04E-05 | 0. 000137 |
| MTNR1B    | 11q14. 3   | -0. 312584822 | 2. 04E-05 | 0. 000137 |
| FBX021    | 12q24. 22  | -0. 312564602 | 2. 05E-05 | 0. 000138 |
| IREB2     | 15q25. 1   | -0. 312526939 | 2. 05E-05 | 0. 000138 |
| WDR74     | 11q12. 3   | 0. 312520662  | 2. 05E-05 | 0. 000138 |
| GPR78     | 4p16. 1    | 0. 312437897  | 2. 06E-05 | 0. 000139 |
| SMG8      | 17q22      | -0. 312426506 | 2. 06E-05 | 0. 000139 |
| ZBTB7B    | 1q21. 3    | 0. 312407675  | 2. 07E-05 | 0. 000139 |
| MRTFB     | 16p13. 12  | -0. 312338627 | 2. 08E-05 | 0. 000139 |
| UCN2      | 3p21. 31   | 0. 312337188  | 2. 08E-05 | 0. 000139 |
| TIMM22    | 17p13. 3   | -0. 312321888 | 2. 08E-05 | 0. 000139 |
| HARS2     | 5q31. 3    | 0. 312231917  | 2. 09E-05 | 0. 00014  |
| HOXA11-AS | 7p15. 2    | 0. 312221597  | 2. 09E-05 | 0. 00014  |
| SFR1      | 10q25. 1   | 0. 312206972  | 2. 09E-05 | 0. 00014  |
| S1PR1     | 1p21. 2    | -0. 312196347 | 2. 1E-05  | 0. 00014  |
| MXRA7     | 17q25. 1   | -0. 31219007  | 2. 1E-05  | 0. 00014  |
| TMEM253   | 14q11. 2   | 0. 312144038  | 2. 1E-05  | 0. 000141 |
| CFAP206   | 6q15       | -0. 312112652 | 2. 11E-05 | 0. 000141 |
| ORC3      | 6q15       | -0. 312112652 | 2. 11E-05 | 0. 000141 |
| INO80E    | 16p11. 2   | 0. 312083359  | 2. 11E-05 | 0. 000141 |
| SFTPA2    | 10q22. 3   | 0. 312077735  | 2. 11E-05 | 0. 000141 |
| CHUK      | 10q24. 31  | -0. 312070805 | 2. 11E-05 | 0. 000141 |
| PGM3      | 6q14. 1    | -0. 312068713 | 2. 11E-05 | 0. 000141 |
| CNTN4     | 3p26. 3-p2 | -0. 31193271  | 2. 13E-05 | 0. 000142 |
| METTL7B   | 12q13. 2   | 0. 311928525  | 2. 13E-05 | 0. 000142 |
| C15ORF62  | 15q15. 1   | 0. 311811353  | 2. 15E-05 | 0. 000143 |
| TMEM114   | 16p13. 2   | 0. 311774603  | 2. 15E-05 | 0. 000144 |
| ABCA13    | 7p12. 3    | 0. 311723012  | 2. 16E-05 | 0. 000144 |
| NAT8L     | 4p16. 3    | -0. 311686464 | 2. 17E-05 | 0. 000144 |
| C12ORF56  | 12q14. 2   | 0. 311677593  | 2. 17E-05 | 0. 000144 |
| ASCC3     | 6q16. 3    | -0. 31160421  | 2. 18E-05 | 0. 000145 |
| BCL2L2    | 14q11. 2   | -0. 311591656 | 2. 18E-05 | 0. 000145 |
| THEM4     | 1q21. 3    | -0. 311541439 | 2. 19E-05 | 0. 000145 |
| PDIK1L    | 1p36. 11   | -0. 311539347 | 2. 19E-05 | 0. 000145 |
| DDX27     | 20q13. 13  | 0. 311420082  | 2. 2E-05  | 0. 000146 |
| ATP8B3    | 19p13. 3   | 0. 311407691  | 2. 2E-05  | 0. 000147 |
| DAGLB     | 7p22. 1    | 0. 311394974  | 2. 21E-05 | 0. 000147 |
| SUMO3     | 21q22. 3   | 0. 311388697  | 2. 21E-05 | 0. 000147 |
| KIAA0087  | 7p15. 2    | -0. 311383644 | 2. 21E-05 | 0. 000147 |
| STK33     | 11p15. 4   | -0. 311367774 | 2. 21E-05 | 0. 000147 |
| JAKMIP2   | 5q32       | -0. 311323834 | 2. 22E-05 | 0. 000147 |
| SDF2      | 17q11. 2   | 0. 311317557  | 2. 22E-05 | 0. 000147 |
| IFRD2     | 3p21. 31   | 0. 311309188  | 2. 22E-05 | 0. 000147 |
| TNNC1     | 3p21. 1    | 0. 311296633  | 2. 22E-05 | 0. 000147 |
| MSH6      | 2p16. 3    | -0. 31124014  | 2. 23E-05 | 0. 000148 |
| SUGCT     | 7p14. 1    | 0. 311235955  | 2. 23E-05 | 0. 000148 |
| TMEM72    | 10q11. 21  | -0. 311234994 | 2. 23E-05 | 0. 000148 |
| ETFBKMT   | 12p11. 21  | -0. 311227586 | 2. 23E-05 | 0. 000148 |
| CCNI2     | 5q31. 1    | 0. 311219216  | 2. 23E-05 | 0. 000148 |
| SLC1A2    | 11p13      | -0. 311156446 | 2. 24E-05 | 0. 000148 |
| SPEF2     | 5p13. 2    | -0. 311116691 | 2. 25E-05 | 0. 000149 |
| FBXL17    | 5q21. 3    | -0. 31108949  | 2. 25E-05 | 0. 000149 |



|           |            |               |           |           |
|-----------|------------|---------------|-----------|-----------|
| TNFSF11   | 13q14. 11  | 0. 311068567  | 2. 25E-05 | 0. 000149 |
| CDH1      | 16q22. 1   | 0. 311051828  | 2. 25E-05 | 0. 000149 |
| TRMO      | 9q22. 33   | -0. 311035089 | 2. 26E-05 | 0. 000149 |
| SPAG4     | 20q11. 22  | 0. 311012073  | 2. 26E-05 | 0. 000149 |
| LINC00689 | 7q36. 3    | -0. 31100979  | 2. 26E-05 | 0. 000149 |
| MBD1      | 18q21. 1   | -0. 310970226 | 2. 27E-05 | 0. 00015  |
| KIF5C     | 2q23. 1-q2 | -0. 310953487 | 2. 27E-05 | 0. 00015  |
| PCDHB1    | 5q31. 3    | -0. 310947018 | 2. 27E-05 | 0. 00015  |
| SYT7      | 11q12. 2   | -0. 310940933 | 2. 27E-05 | 0. 00015  |
| YLPM1     | 14q24. 3   | -0. 310907455 | 2. 28E-05 | 0. 00015  |
| CD209     | 19p13. 2   | -0. 310869793 | 2. 28E-05 | 0. 00015  |
| GUSBP4    | 6p11. 2    | -0. 310869793 | 2. 28E-05 | 0. 00015  |
| HBEGF     | 5q31. 3    | 0. 310848869  | 2. 28E-05 | 0. 00015  |
| GPR152    | 11q13. 2   | 0. 310764662  | 2. 3E-05  | 0. 000151 |
| CDHR5     | 11p15. 5   | 0. 310662649  | 2. 31E-05 | 0. 000152 |
| EDRF1     | 10q26. 2   | -0. 310660557 | 2. 31E-05 | 0. 000152 |
| C10RF53   | 1q31. 3    | 0. 310601971  | 2. 32E-05 | 0. 000153 |
| BEST1     | 11q12. 3   | -0. 310601971 | 2. 32E-05 | 0. 000153 |
| SMPX      | Xp22. 12   | 0. 31057945   | 2. 32E-05 | 0. 000153 |
| CLEC1A    | 12p13. 2   | -0. 310530831 | 2. 33E-05 | 0. 000153 |
| C12ORF42  | 12q23. 2-c | -0. 310517086 | 2. 33E-05 | 0. 000153 |
| SETDB2    | 13q14. 2   | -0. 310516184 | 2. 33E-05 | 0. 000153 |
| PRDM8     | 4q21. 21   | 0. 310486891  | 2. 34E-05 | 0. 000153 |
| TPBG      | 6q14. 1    | 0. 310457598  | 2. 34E-05 | 0. 000154 |
| MTMR3     | 22q12. 2   | -0. 310380181 | 2. 35E-05 | 0. 000154 |
| PSMG4     | 6p25. 2    | 0. 310373904  | 2. 35E-05 | 0. 000154 |
| DIRAS1    | 19p13. 3   | -0. 310216977 | 2. 38E-05 | 0. 000156 |
| HTR1D     | 1p36. 12   | 0. 310214885  | 2. 38E-05 | 0. 000156 |
| BBIP1     | 10q25. 2   | -0. 310193961 | 2. 38E-05 | 0. 000156 |
| ATG4C     | 1p31. 3    | -0. 310191869 | 2. 38E-05 | 0. 000156 |
| FNDC11    | 20q13. 33  | 0. 31008009   | 2. 4E-05  | 0. 000157 |
| CADPS     | 3p14. 2    | -0. 310041219 | 2. 4E-05  | 0. 000157 |
| NMRAL1    | 16p13. 3   | 0. 309976356  | 2. 41E-05 | 0. 000158 |
| C8ORF86   | 8p11. 22   | -0. 309970051 | 2. 42E-05 | 0. 000158 |
| ASGR2     | 17p13. 1   | -0. 309959618 | 2. 42E-05 | 0. 000158 |
| EFR3B     | 2p23. 3    | -0. 309932417 | 2. 42E-05 | 0. 000158 |
| LRRC42    | 1p32. 3    | 0. 309888477  | 2. 43E-05 | 0. 000159 |
| SNHG12    | 1p35. 3    | 0. 309767121  | 2. 45E-05 | 0. 00016  |
| SLC25A44  | 1q22       | -0. 309765028 | 2. 45E-05 | 0. 00016  |
| GRIN3A    | 9q31. 1    | -0. 309752474 | 2. 45E-05 | 0. 00016  |
| AUH       | 9q22. 31   | -0. 309727366 | 2. 45E-05 | 0. 00016  |
| SAXO2     | 15q25. 2   | -0. 309714812 | 2. 46E-05 | 0. 00016  |
| C12ORF4   | 12p13. 32  | -0. 309700165 | 2. 46E-05 | 0. 00016  |
| RSP01     | 1p34. 3    | -0. 309615525 | 2. 47E-05 | 0. 000161 |
| PNMA8A    | 19q13. 32  | -0. 309612286 | 2. 47E-05 | 0. 000161 |
| SAPCD2    | 9q34. 3    | 0. 309610194  | 2. 47E-05 | 0. 000161 |
| KIF5A     | 12q13. 3   | -0. 309585248 | 2. 48E-05 | 0. 000161 |
| CHRNA5    | 15q25. 1   | 0. 309576716  | 2. 48E-05 | 0. 000161 |
| MRPS21    | 1q21. 2    | 0. 309470006  | 2. 49E-05 | 0. 000162 |
| MAPK8     | 10q11. 22  | -0. 309449083 | 2. 5E-05  | 0. 000162 |
| TTYH3     | 7p22. 3    | 0. 309432344  | 2. 5E-05  | 0. 000163 |
| LDLRAD2   | 1p36. 12   | 0. 309432344  | 2. 5E-05  | 0. 000163 |
| ADARB1    | 21q22. 3   | -0. 30941979  | 2. 5E-05  | 0. 000163 |
| CTDSP2    | 12q14. 1   | -0. 309380035 | 2. 51E-05 | 0. 000163 |

|          |           |              |          |          |
|----------|-----------|--------------|----------|----------|
| TGFBRAP1 | 2q12.1-q1 | -0.30929634  | 2.52E-05 | 0.000164 |
| FASTKD5  | 20p13     | -0.309264955 | 2.53E-05 | 0.000164 |
| ANKRD44  | 2q33.1    | -0.309252401 | 2.53E-05 | 0.000164 |
| ADGRL1   | 19p13.12  | -0.309246124 | 2.53E-05 | 0.000164 |
| HSD17B2  | 16q23.3   | 0.309204277  | 2.54E-05 | 0.000164 |
| TRIM21   | 11p15.4   | 0.309204277  | 2.54E-05 | 0.000164 |
| ATRNL1   | 10q25.3   | -0.309198    | 2.54E-05 | 0.000164 |
| MRPS5    | 2q11.1    | 0.309183353  | 2.54E-05 | 0.000165 |
| RGP1     | 9p13.3    | -0.309179168 | 2.54E-05 | 0.000165 |
| BRMS1    | 11q13.2   | 0.309128952  | 2.55E-05 | 0.000165 |
| MTERF2   | 12q23.3   | -0.309110121 | 2.55E-05 | 0.000165 |
| ECH1     | 19q13.2   | 0.309095474  | 2.55E-05 | 0.000165 |
| USO1     | 4q21.1    | -0.309087105 | 2.56E-05 | 0.000165 |
| ZFP37    | 9q32      | -0.309070366 | 2.56E-05 | 0.000165 |
| AGO3     | 1p34.3    | -0.309036888 | 2.56E-05 | 0.000166 |
| MAP2K6   | 17q24.3   | -0.308944825 | 2.58E-05 | 0.000167 |
| ZNF470   | 19q13.43  | -0.30893227  | 2.58E-05 | 0.000167 |
| DUSP16   | 12p13.2   | -0.308875777 | 2.59E-05 | 0.000167 |
| RAB38    | 11q14.2   | 0.308829745  | 2.6E-05  | 0.000168 |
| ETFRF1   | 12p12.1   | -0.308743958 | 2.61E-05 | 0.000169 |
| PCGF1    | 2p13.1    | 0.308731404  | 2.61E-05 | 0.000169 |
| TRMT112  | 11q13.1   | 0.308706296  | 2.62E-05 | 0.000169 |
| GUCY1B1  | 4q32.1    | -0.308677003 | 2.62E-05 | 0.000169 |
| CSTA     | 3q21.1    | 0.308672818  | 2.62E-05 | 0.000169 |
| CSTF2T   | 10q21.1   | -0.308658172 | 2.63E-05 | 0.000169 |
| NR1H3    | 11p11.2   | 0.308641433  | 2.63E-05 | 0.000169 |
| ZNF483   | 9q31.3    | -0.308624694 | 2.63E-05 | 0.000169 |
| SLC49A3  | 4p16.3    | 0.308595401  | 2.64E-05 | 0.00017  |
| JADE2    | 5q31.1    | -0.308582847 | 2.64E-05 | 0.00017  |
| SLC43A2  | 17p13.3   | -0.308564016 | 2.64E-05 | 0.00017  |
| ZNF708   | 19p12     | -0.308419643 | 2.67E-05 | 0.000171 |
| LYPLA2P1 | 6p21.32   | 0.308394535  | 2.67E-05 | 0.000172 |
| ZNF879   | 5q35.3    | -0.308381981 | 2.67E-05 | 0.000172 |
| CRK      | 17p13.3   | -0.308373611 | 2.67E-05 | 0.000172 |
| CYP46A1  | 14q32.2   | -0.308365242 | 2.67E-05 | 0.000172 |
| MECOM    | 3q26.2    | 0.308346411  | 2.68E-05 | 0.000172 |
| ARHGAP28 | 18p11.31  | -0.308321302 | 2.68E-05 | 0.000172 |
| ZZZ3     | 1p31.1    | -0.308233423 | 2.7E-05  | 0.000173 |
| PSME2    | 14q12     | 0.308208315  | 2.7E-05  | 0.000173 |
| CCPG1    | 15q21.3   | -0.308174837 | 2.71E-05 | 0.000174 |
| CYP26A1  | 10q23.33  | 0.308160848  | 2.71E-05 | 0.000174 |
| FGF10    | 5p12      | -0.308142553 | 2.71E-05 | 0.000174 |
| SLC9B2   | 4q24      | 0.30810579   | 2.72E-05 | 0.000174 |
| ZKSCAN7  | 3p21.31   | -0.308072312 | 2.72E-05 | 0.000175 |
| CKMT1A   | 15q15.3   | 0.308068127  | 2.73E-05 | 0.000175 |
| KIF3A    | 5q31.1    | -0.308034649 | 2.73E-05 | 0.000175 |
| UPP1     | 7p12.3    | 0.307938401  | 2.75E-05 | 0.000176 |
| CERS3    | 15q26.3   | -0.307902346 | 2.75E-05 | 0.000176 |
| CYYR1    | 21q21.3   | -0.307867261 | 2.76E-05 | 0.000177 |
| ZNF91    | 19p12     | -0.307846337 | 2.76E-05 | 0.000177 |
| TP73     | 1p36.32   | 0.307829598  | 2.77E-05 | 0.000177 |
| ERG28    | 14q24.3   | 0.307668487  | 2.79E-05 | 0.000179 |
| SLIT3    | 5q34-q35. | -0.307664302 | 2.8E-05  | 0.000179 |
| IPMK     | 10q21.1   | -0.307664302 | 2.8E-05  | 0.000179 |

|           |                     |               |           |           |
|-----------|---------------------|---------------|-----------|-----------|
| NKAIN2    | 6q22. 31            | -0. 307659955 | 2. 8E-05  | 0. 000179 |
| TMTC3     | 12q21. 32           | -0. 307639194 | 2. 8E-05  | 0. 000179 |
| RRAS2     | 11p15. 2            | 0. 307540853  | 2. 82E-05 | 0. 00018  |
| CAPN9     | 1q42. 2             | 0. 307517113  | 2. 82E-05 | 0. 00018  |
| CECR2     | 22q11. 1-c          | -0. 307496107 | 2. 83E-05 | 0. 00018  |
| RTL5      | Xq13. 1             | -0. 307488544 | 2. 83E-05 | 0. 00018  |
| NDE1      | 16p13. 11           | 0. 307459251  | 2. 83E-05 | 0. 00018  |
| INPP4A    | 2q11. 2             | -0. 307457159 | 2. 83E-05 | 0. 00018  |
| PID1      | 2q36. 3             | -0. 307452974 | 2. 83E-05 | 0. 00018  |
| IRF7      | 11p15. 5            | 0. 307436235  | 2. 84E-05 | 0. 000181 |
| RBM34     | 1q42. 3             | 0. 307425774  | 2. 84E-05 | 0. 000181 |
| CWC15     | 11q21               | 0. 307396481  | 2. 84E-05 | 0. 000181 |
| FAM193A   | 4p16. 3             | -0. 307392296 | 2. 84E-05 | 0. 000181 |
| ZNF329    | 19q13. 43           | -0. 307354634 | 2. 85E-05 | 0. 000181 |
| DCAF7     | 17q23. 3            | -0. 307270939 | 2. 87E-05 | 0. 000182 |
| ATP2A1    | 16p11. 2            | 0. 307245831  | 2. 87E-05 | 0. 000182 |
| COMMD4    | 15q24. 2            | 0. 307193522  | 2. 88E-05 | 0. 000183 |
| VBP1      | Xq28                | -0. 307126567 | 2. 89E-05 | 0. 000184 |
| PRKAR2A   | 3p21. 31            | -0. 307114013 | 2. 89E-05 | 0. 000184 |
| ZNF57     | 19p13. 3            | 0. 307009395  | 2. 91E-05 | 0. 000185 |
| TESC      | 12q24. 22           | 0. 306967548  | 2. 92E-05 | 0. 000185 |
| SEC1P     | 19q13. 33           | 0. 306965455  | 2. 92E-05 | 0. 000185 |
| SLC7A10   | 19q13. 11           | -0. 306963867 | 2. 92E-05 | 0. 000185 |
| DCAF15    | 19p13. 12           | 0. 306885946  | 2. 94E-05 | 0. 000186 |
| CDK19     | 6q21                | -0. 306869207 | 2. 94E-05 | 0. 000186 |
| BAZ1B     | 7q11. 23            | -0. 306781328 | 2. 96E-05 | 0. 000187 |
| PLXNB2    | 22q13. 33           | 0. 306764589  | 2. 96E-05 | 0. 000187 |
| ANKRD26   | 10p12. 1            | -0. 306758312 | 2. 96E-05 | 0. 000187 |
| UQCC2     | 6p21. 31            | 0. 306716465  | 2. 97E-05 | 0. 000188 |
| ASTN1     | 1q25. 2             | -0. 306710746 | 2. 97E-05 | 0. 000188 |
| MED19     | 11q12. 1            | 0. 306710188  | 2. 97E-05 | 0. 000188 |
| SMC3      | 10q25. 2            | -0. 306645325 | 2. 98E-05 | 0. 000188 |
| XKR9      | 8q13. 3             | 0. 306639048  | 2. 98E-05 | 0. 000188 |
| COP1      | 1q25. 1-q $\dot{2}$ | 0. 306582554  | 2. 99E-05 | 0. 000189 |
| CCNA1     | 13q13. 3            | -0. 306580622 | 2. 99E-05 | 0. 000189 |
| RYR2      | 1q43                | -0. 306511414 | 3. 01E-05 | 0. 00019  |
| YTHDC1    | 4q13. 2             | -0. 306436089 | 3. 02E-05 | 0. 000191 |
| CANT1     | 17q25. 3            | 0. 306429812  | 3. 02E-05 | 0. 000191 |
| EGOT      | 3p26. 1             | 0. 306413452  | 3. 02E-05 | 0. 000191 |
| POLA1     | Xp22. 11-f          | -0. 306391264 | 3. 03E-05 | 0. 000191 |
| LINC00518 | 6p24. 3             | 0. 306385501  | 3. 03E-05 | 0. 000191 |
| FANCC     | 9q22. 32            | -0. 30630427  | 3. 05E-05 | 0. 000192 |
| NRXN3     | 14q24. 3-c          | -0. 306266608 | 3. 05E-05 | 0. 000192 |
| SLC25A39  | 17q21. 31           | 0. 306092942  | 3. 09E-05 | 0. 000194 |
| SLF1      | 5q15                | -0. 306049003 | 3. 09E-05 | 0. 000195 |
| TSTD1     | 1q23. 3             | 0. 305990417  | 3. 11E-05 | 0. 000195 |
| BAIAP2    | 17q25. 3            | 0. 305977863  | 3. 11E-05 | 0. 000196 |
| FAM192A   | 16q13               | 0. 305881614  | 3. 13E-05 | 0. 000197 |
| KCNA6     | 12p13. 32           | -0. 305730965 | 3. 16E-05 | 0. 000198 |
| WRB       | 21q22. 2            | -0. 305687025 | 3. 17E-05 | 0. 000199 |
| DENND2A   | 7q34                | -0. 305676564 | 3. 17E-05 | 0. 000199 |
| HDGF      | 1q23. 1             | 0. 305630532  | 3. 18E-05 | 0. 0002   |
| SKIDA1    | 10p12. 31           | -0. 30557613  | 3. 19E-05 | 0. 0002   |
| SCAF11    | 12q12               | -0. 305546837 | 3. 19E-05 | 0. 0002   |

|           |           |               |           |           |
|-----------|-----------|---------------|-----------|-----------|
| BST2      | 19p13. 11 | 0. 305471513  | 3. 21E-05 | 0. 000201 |
| COTL1     | 16q24. 1  | 0. 305444312  | 3. 21E-05 | 0. 000202 |
| DHCR7     | 11q13. 4  | 0. 305431758  | 3. 22E-05 | 0. 000202 |
| TMEM50A   | 1p36. 11  | 0. 305423388  | 3. 22E-05 | 0. 000202 |
| PIGC      | 1q24. 3   | 0. 305408742  | 3. 22E-05 | 0. 000202 |
| ST8SIA4   | 5q21. 1   | -0. 305360618 | 3. 23E-05 | 0. 000202 |
| SRGAP3    | 3p25. 3   | -0. 305354341 | 3. 23E-05 | 0. 000202 |
| CA12      | 15q22. 2  | 0. 305325048  | 3. 24E-05 | 0. 000203 |
| C9ORF72   | 9p21. 2   | -0. 305287385 | 3. 25E-05 | 0. 000203 |
| PCDHA6    | 5q31. 3   | -0. 305271748 | 3. 25E-05 | 0. 000203 |
| ANKRD13C  | 1p31. 1   | -0. 305270646 | 3. 25E-05 | 0. 000203 |
| ARMCX2    | Xq22. 1   | -0. 30522043  | 3. 26E-05 | 0. 000204 |
| LOC441204 | 7p15. 2   | -0. 305214153 | 3. 26E-05 | 0. 000204 |
| TMEM101   | 17q21. 31 | 0. 305180675  | 3. 27E-05 | 0. 000204 |
| MKKS      | 20p12. 2  | -0. 305130458 | 3. 28E-05 | 0. 000205 |
| ZNF800    | 7q31. 33  | -0. 305050949 | 3. 29E-05 | 0. 000206 |
| SLC9A4    | 2q12. 1   | 0. 305040044  | 3. 3E-05  | 0. 000206 |
| LCN10     | 9q34. 3   | -0. 305032118 | 3. 3E-05  | 0. 000206 |
| CPOX      | 3q11. 2   | 0. 305015379  | 3. 3E-05  | 0. 000206 |
| NRIP2     | 12p13. 33 | -0. 304981901 | 3. 31E-05 | 0. 000206 |
| C10RF159  | 1p36. 33  | 0. 304975624  | 3. 31E-05 | 0. 000206 |
| CD93      | 20p11. 21 | -0. 304937962 | 3. 32E-05 | 0. 000207 |
| MPST      | 22q12. 3  | 0. 304912853  | 3. 32E-05 | 0. 000207 |
| AP3M2     | 8p11. 21  | 0. 304894022  | 3. 33E-05 | 0. 000207 |
| CIA02B    | 16q22. 1  | 0. 304887745  | 3. 33E-05 | 0. 000207 |
| TUSC3     | 8p22      | -0. 304804051 | 3. 35E-05 | 0. 000208 |
| DHX33     | 17p13. 2  | -0. 304781035 | 3. 35E-05 | 0. 000209 |
| B3GALT5   | 21q22. 2  | 0. 304707802  | 3. 37E-05 | 0. 000209 |
| HYOU1     | 11q23. 3  | -0. 304649216 | 3. 38E-05 | 0. 00021  |
| MRPL16    | 11q12. 1  | 0. 304632478  | 3. 38E-05 | 0. 00021  |
| SNORD116  | 15q11. 2  | -0. 304629824 | 3. 38E-05 | 0. 00021  |
| WTAP      | 6q25. 3   | -0. 304559245 | 3. 4E-05  | 0. 000211 |
| VPS13C    | 15q22. 2  | -0. 304498567 | 3. 41E-05 | 0. 000212 |
| LTV1      | 6q24. 2   | -0. 304494382 | 3. 41E-05 | 0. 000212 |
| RIC3      | 11p15. 4  | -0. 304486013 | 3. 41E-05 | 0. 000212 |
| PFDN1     | 5q31. 3   | 0. 304458812  | 3. 42E-05 | 0. 000212 |
| CCDC141   | 2q31. 2   | -0. 304424447 | 3. 43E-05 | 0. 000213 |
| SCAMP5    | 15q24. 2  | -0. 304393949 | 3. 43E-05 | 0. 000213 |
| SLC25A48  | 5q31. 1   | 0. 304392829  | 3. 43E-05 | 0. 000213 |
| TMEM201   | 1p36. 22  | -0. 304391857 | 3. 43E-05 | 0. 000213 |
| PITPNM2   | 12q24. 31 | -0. 304375118 | 3. 44E-05 | 0. 000213 |
| ZMAT1     | Xq22. 1   | -0. 304337455 | 3. 44E-05 | 0. 000213 |
| TRIM37    | 17q22     | -0. 304312347 | 3. 45E-05 | 0. 000214 |
| PDSS2     | 6q21      | -0. 304301885 | 3. 45E-05 | 0. 000214 |
| ELOVL5    | 6p12. 1   | -0. 304237022 | 3. 47E-05 | 0. 000215 |
| AQP4-AS1  | 18q11. 2  | -0. 304165844 | 3. 48E-05 | 0. 000215 |
| MMD2      | 7p22. 1   | -0. 304163955 | 3. 48E-05 | 0. 000215 |
| C1QTNF9   | 13q12. 12 | -0. 304135917 | 3. 49E-05 | 0. 000216 |
| PFN2      | 3q25. 1   | -0. 304029879 | 3. 51E-05 | 0. 000217 |
| ATP6V1C1  | 8q22. 3   | -0. 303931538 | 3. 53E-05 | 0. 000218 |
| SH2D3C    | 9q34. 11  | -0. 303839474 | 3. 55E-05 | 0. 000219 |
| ZNF652    | 17q21. 32 | -0. 303797627 | 3. 56E-05 | 0. 00022  |
| LINC00473 | 6q27      | -0. 303773605 | 3. 57E-05 | 0. 00022  |
| NAIP      | 5q13. 2   | -0. 303759965 | 3. 57E-05 | 0. 00022  |

|           |           |               |           |           |
|-----------|-----------|---------------|-----------|-----------|
| CCDC51    | 3p21. 31  | 0. 303757872  | 3. 57E-05 | 0. 00022  |
| DQX1      | 2p13. 1   | 0. 303712383  | 3. 58E-05 | 0. 000221 |
| SMAD1     | 4q31. 21  | -0. 303693009 | 3. 59E-05 | 0. 000221 |
| FOXK1     | 7p22. 1   | -0. 303676271 | 3. 59E-05 | 0. 000221 |
| SMYD5     | 2p13. 2   | 0. 303634423  | 3. 6E-05  | 0. 000222 |
| CDC5L     | 6p21. 1   | -0. 303615592 | 3. 6E-05  | 0. 000222 |
| RHOJ      | 14q23. 2  | -0. 3036135   | 3. 6E-05  | 0. 000222 |
| ITPR2     | 12p11. 23 | -0. 303580022 | 3. 61E-05 | 0. 000222 |
| SLC25A10  | 17q25. 3  | 0. 303550729  | 3. 62E-05 | 0. 000223 |
| TMEM79    | 1q22      | 0. 303533103  | 3. 62E-05 | 0. 000223 |
| MAPKBP1   | 15q15. 1  | -0. 303515159 | 3. 63E-05 | 0. 000223 |
| CCDC58    | 3q21. 1   | 0. 303502605  | 3. 63E-05 | 0. 000223 |
| NSMCE3    | 15q13. 1  | -0. 303475404 | 3. 63E-05 | 0. 000223 |
| ANXA1     | 9q21. 13  | 0. 303444019  | 3. 64E-05 | 0. 000224 |
| NFATC2IP  | 16p11. 2  | 0. 30343565   | 3. 64E-05 | 0. 000224 |
| KIFC2     | 8q24. 3   | 0. 30340008   | 3. 65E-05 | 0. 000224 |
| C10RF35   | 1q42. 13  | 0. 303372879  | 3. 66E-05 | 0. 000225 |
| SHROOM1   | 5q31. 1   | 0. 303331032  | 3. 67E-05 | 0. 000225 |
| CTDSPL    | 3p22. 2   | 0. 303282908  | 3. 68E-05 | 0. 000226 |
| GIMAP5    | 7q36. 1   | -0. 303268261 | 3. 68E-05 | 0. 000226 |
| DIXDC1    | 11q23. 1  | -0. 303264076 | 3. 68E-05 | 0. 000226 |
| ERMAP     | 1p34. 2   | -0. 303230599 | 3. 69E-05 | 0. 000226 |
| HCN1      | 5p12      | -0. 303225741 | 3. 69E-05 | 0. 000226 |
| FAM98C    | 19q13. 2  | 0. 303151089  | 3. 71E-05 | 0. 000227 |
| UNQ6494   | 9q22. 2   | -0. 30313436  | 3. 71E-05 | 0. 000227 |
| RER1      | 1p36. 32  | 0. 303115519  | 3. 72E-05 | 0. 000228 |
| PLA2R1    | 2q24. 2   | 0. 303046471  | 3. 73E-05 | 0. 000228 |
| PUS7L     | 12q12     | -0. 302987885 | 3. 75E-05 | 0. 000229 |
| PCDHA3    | 5q31. 3   | -0. 302965028 | 3. 75E-05 | 0. 000229 |
| IGF1      | 12q23. 2  | -0. 302939761 | 3. 76E-05 | 0. 00023  |
| DVL2      | 17p13. 1  | -0. 302931392 | 3. 76E-05 | 0. 00023  |
| MERTK     | 2q13      | -0. 302895822 | 3. 77E-05 | 0. 00023  |
| PSMD13    | 11p15. 5  | 0. 30288536   | 3. 77E-05 | 0. 00023  |
| NEK4      | 3p21. 1   | -0. 302858159 | 3. 78E-05 | 0. 000231 |
| ATRX      | Xq21. 1   | -0. 302820497 | 3. 78E-05 | 0. 000231 |
| BAG2      | 6p12. 1   | -0. 302801666 | 3. 79E-05 | 0. 000231 |
| FGF7      | 15q21. 2  | -0. 302761911 | 3. 8E-05  | 0. 000232 |
| PMM2      | 16p13. 2  | 0. 302671939  | 3. 82E-05 | 0. 000233 |
| SARAF     | 8p12      | -0. 302669847 | 3. 82E-05 | 0. 000233 |
| TUBD1     | 17q23. 1  | -0. 302665662 | 3. 82E-05 | 0. 000233 |
| FRMD8     | 11q13. 1  | 0. 302596615  | 3. 84E-05 | 0. 000234 |
| MPP3      | 17q21. 31 | 0. 302586153  | 3. 84E-05 | 0. 000234 |
| SSBP2     | 5q14. 1   | -0. 302565229 | 3. 85E-05 | 0. 000234 |
| LRRC57    | 15q15. 2  | 0. 30248572   | 3. 86E-05 | 0. 000235 |
| CNTNAP4   | 16q23. 1  | -0. 302371163 | 3. 89E-05 | 0. 000237 |
| PTPN18    | 2q21. 1   | 0. 302362271  | 3. 89E-05 | 0. 000237 |
| ELAVL4    | 1p33-p32. | -0. 302327687 | 3. 9E-05  | 0. 000237 |
| PRDX1     | 1p34. 1   | 0. 302291131  | 3. 91E-05 | 0. 000238 |
| SEM1      | 7q21. 3   | 0. 302178143  | 3. 94E-05 | 0. 000239 |
| ENAM      | 4q13. 3   | -0. 302070686 | 3. 96E-05 | 0. 000241 |
| GAS5      | 1q25. 1   | 0. 302050509  | 3. 97E-05 | 0. 000241 |
| C17ORF107 | 17p13. 2  | -0. 302012847 | 3. 98E-05 | 0. 000242 |
| SLC25A53  | Xq22. 2   | -0. 302000293 | 3. 98E-05 | 0. 000242 |
| SERPINI1  | 3q26. 1   | -0. 301994016 | 3. 98E-05 | 0. 000242 |

|           |           |              |          |          |
|-----------|-----------|--------------|----------|----------|
| RASA4     | 7q22.1    | -0.301954261 | 3.99E-05 | 0.000242 |
| ALDH1L2   | 12q23.3   | -0.301924968 | 4E-05    | 0.000243 |
| UBL3      | 13q12.3   | -0.301858013 | 4.02E-05 | 0.000244 |
| UGT1A1    | 2q37.1    | 0.301819073  | 4.03E-05 | 0.000244 |
| DPT       | 1q24.2    | -0.301816166 | 4.03E-05 | 0.000244 |
| SMG9      | 19q13.31  | 0.301788965  | 4.03E-05 | 0.000244 |
| ENOX1     | 13q14.11  | -0.30178478  | 4.04E-05 | 0.000244 |
| GEMIN4    | 17p13.3   | -0.301759672 | 4.04E-05 | 0.000245 |
| KCNK15    | 20q13.12  | 0.301753395  | 4.04E-05 | 0.000245 |
| SKA3      | 13q12.11  | 0.30167807   | 4.06E-05 | 0.000246 |
| FGF7P6    | 9q13      | -0.301674406 | 4.06E-05 | 0.000246 |
| PDE2A     | 11q13.4   | -0.301667608 | 4.06E-05 | 0.000246 |
| C9ORF16   | 9q34.11   | 0.301655054  | 4.07E-05 | 0.000246 |
| ADPRHL2   | 1p34.3    | 0.301632038  | 4.07E-05 | 0.000246 |
| BMP2K     | 4q21.21   | -0.301629946 | 4.07E-05 | 0.000246 |
| ZNHIT1    | 7q22.1    | 0.301629946  | 4.07E-05 | 0.000246 |
| IER5L     | 9q34.11   | 0.301604838  | 4.08E-05 | 0.000246 |
| SCARB2    | 4q21.1    | -0.301504404 | 4.11E-05 | 0.000248 |
| PKN3      | 9q34.11   | 0.301475111  | 4.11E-05 | 0.000248 |
| FADS1     | 11q12.2   | -0.30145628  | 4.12E-05 | 0.000249 |
| GCNT3     | 15q22.2   | 0.301441634  | 4.12E-05 | 0.000249 |
| EIF1AD    | 11q13.1   | 0.301426987  | 4.13E-05 | 0.000249 |
| ANXA5     | 4q27      | 0.301383048  | 4.14E-05 | 0.000249 |
| SERPINB11 | 18q21.33  | 0.301354813  | 4.14E-05 | 0.00025  |
| SYT14     | 1q32.2    | -0.301312218 | 4.15E-05 | 0.00025  |
| MAP9      | 4q32.1    | -0.301297261 | 4.16E-05 | 0.000251 |
| FMN2      | 1q43      | -0.301249137 | 4.17E-05 | 0.000251 |
| DPP9      | 19p13.3   | 0.301226121  | 4.18E-05 | 0.000251 |
| RPS6KA6   | Xq21.1    | -0.301121785 | 4.2E-05  | 0.000253 |
| SLC16A12  | 10q23.31  | -0.301031532 | 4.23E-05 | 0.000254 |
| ZKSCAN8   | 6p22.1    | -0.301002239 | 4.23E-05 | 0.000255 |
| KIAA0100  | 17q11.2   | -0.300987592 | 4.24E-05 | 0.000255 |
| ARHGEF2   | 1q22      | 0.300983408  | 4.24E-05 | 0.000255 |
| PRCP      | 11q14.1   | -0.300979223 | 4.24E-05 | 0.000255 |
| PGLS      | 19p13.11  | 0.300968761  | 4.24E-05 | 0.000255 |
| AMER1     | Xq11.2    | -0.300964576 | 4.24E-05 | 0.000255 |
| HES4      | 1p36.33   | 0.300960392  | 4.25E-05 | 0.000255 |
| ZNF398    | 7q36.1    | -0.300922729 | 4.26E-05 | 0.000255 |
| CACNA1B   | 9q34.3    | -0.300909138 | 4.26E-05 | 0.000256 |
| CARNMT1   | 9q21.13   | -0.30090599  | 4.26E-05 | 0.000256 |
| FAM177A1  | 14q13.2   | 0.300899713  | 4.26E-05 | 0.000256 |
| ZNF391    | 6p22.1    | -0.300880882 | 4.27E-05 | 0.000256 |
| AXDND1    | 1q25.2    | 0.300879611  | 4.27E-05 | 0.000256 |
| XPC       | 3p25.1    | -0.300818111 | 4.28E-05 | 0.000257 |
| EVL       | 14q32.2   | -0.300780449 | 4.29E-05 | 0.000257 |
| CEMIP     | 15q25.1   | 0.300751156  | 4.3E-05  | 0.000258 |
| RAPH1     | 2q33.2    | 0.300734417  | 4.31E-05 | 0.000258 |
| DEPDC5    | 22q12.2-c | -0.300730232 | 4.31E-05 | 0.000258 |
| IER3      | 6p21.33   | 0.300726048  | 4.31E-05 | 0.000258 |
| RGPD5     | 2q13      | -0.300707217 | 4.31E-05 | 0.000258 |
| LINC01018 | 5p15.31   | -0.30067646  | 4.32E-05 | 0.000258 |
| RRAD      | 16q22.1   | 0.300646538  | 4.33E-05 | 0.000259 |
| HEG1      | 3q21.2    | -0.300590045 | 4.34E-05 | 0.00026  |
| SLC35C2   | 20q13.12  | 0.300504258  | 4.37E-05 | 0.000261 |

|          |          |              |          |          |
|----------|----------|--------------|----------|----------|
| STAT6    | 12q13.3  | 0.300481242  | 4.37E-05 | 0.000261 |
| LIMD1    | 3p21.31  | -0.300449857 | 4.38E-05 | 0.000262 |
| CASC3    | 17q21.1  | -0.300441487 | 4.38E-05 | 0.000262 |
| ZSCAN4   | 19q13.43 | 0.300402984  | 4.39E-05 | 0.000262 |
| RAD54L2  | 3p21.2   | -0.300315946 | 4.42E-05 | 0.000263 |
| KIF19    | 17q25.1  | -0.300232252 | 4.44E-05 | 0.000265 |
| UNC79    | 14q32.12 | -0.300169481 | 4.46E-05 | 0.000266 |
| EHD4     | 15q15.1  | 0.300131818  | 4.47E-05 | 0.000266 |
| PCLAF    | 15q22.31 | 0.300080713  | 4.48E-05 | 0.000267 |
| CEP78    | 9q21.2   | -0.30007951  | 4.48E-05 | 0.000267 |
| RXFP4    | 1q22     | 0.300046035  | 4.49E-05 | 0.000267 |
| NEFL     | 8p21.2   | -0.299993723 | 4.51E-05 | 0.000268 |
| SH3BP2   | 4p16.3   | 0.299962338  | 4.51E-05 | 0.000269 |
| UNC13B   | 9p13.3   | -0.299876551 | 4.54E-05 | 0.00027  |
| FAM189B  | 1q22     | 0.299782395  | 4.56E-05 | 0.000271 |
| FAM168A  | 11q13.4  | -0.299713347 | 4.58E-05 | 0.000273 |
| MIOS     | 7p21.3   | -0.29970707  | 4.59E-05 | 0.000273 |
| CHST7    | Xp11.3   | -0.299679869 | 4.59E-05 | 0.000273 |
| SUCO     | 1q24.3   | -0.299677777 | 4.59E-05 | 0.000273 |
| C6ORF15  | 6p21.33  | 0.299669911  | 4.6E-05  | 0.000273 |
| OPTN     | 10p13    | 0.29963593   | 4.61E-05 | 0.000273 |
| MRPL10   | 17q21.32 | 0.299568975  | 4.62E-05 | 0.000274 |
| SP100    | 2q37.1   | 0.299535497  | 4.63E-05 | 0.000275 |
| YARS2    | 12p11.21 | 0.299483188  | 4.65E-05 | 0.000276 |
| ARID1B   | 6q25.3   | -0.299470634 | 4.65E-05 | 0.000276 |
| TIMM29   | 19p13.2  | 0.299466449  | 4.65E-05 | 0.000276 |
| YTHDF3   | 8q12.3   | -0.299407863 | 4.67E-05 | 0.000277 |
| ESPNP    | 1p36.13  | 0.299354934  | 4.69E-05 | 0.000278 |
| KIAA0319 | 6p22.3   | -0.299349277 | 4.69E-05 | 0.000278 |
| KRBA1    | 7q36.1   | -0.299299061 | 4.7E-05  | 0.000278 |
| LYVE1    | 11p15.4  | -0.299259306 | 4.71E-05 | 0.000279 |
| FZR1     | 19p13.3  | 0.299253029  | 4.71E-05 | 0.000279 |
| ABTB1    | 3q21.3   | 0.299244659  | 4.72E-05 | 0.000279 |
| ZNF491   | 19p13.2  | -0.299242567 | 4.72E-05 | 0.000279 |
| LATS1    | 6q25.1   | -0.299215366 | 4.73E-05 | 0.000279 |
| ZNF397   | 18q12.2  | -0.299194443 | 4.73E-05 | 0.00028  |
| RXFP1    | 4q32.1   | -0.299167066 | 4.74E-05 | 0.00028  |
| VWA2     | 10q25.3  | 0.299146318  | 4.75E-05 | 0.00028  |
| ZNF30    | 19q13.11 | -0.299106564 | 4.76E-05 | 0.000281 |
| BSN      | 3p21.31  | -0.299068901 | 4.77E-05 | 0.000281 |
| AXIN1    | 16p13.3  | 0.299066809  | 4.77E-05 | 0.000281 |
| TXNL1    | 18q21.31 | -0.299033331 | 4.78E-05 | 0.000282 |
| CTBS     | 1p22.3   | -0.299008223 | 4.79E-05 | 0.000282 |
| VPS72    | 1q21.3   | 0.298999854  | 4.79E-05 | 0.000282 |
| TBC1D3C  | 17q12    | 0.298962627  | 4.8E-05  | 0.000283 |
| NLK      | 17q11.2  | -0.298842927 | 4.83E-05 | 0.000285 |
| TPST1    | 7q11.21  | -0.298840834 | 4.84E-05 | 0.000285 |
| CELSR2   | 1p13.3   | -0.298788526 | 4.85E-05 | 0.000286 |
| EPN3     | 17q21.33 | 0.298787636  | 4.85E-05 | 0.000286 |
| GCNT4    | 5q13.3   | -0.298767602 | 4.86E-05 | 0.000286 |
| TNS2     | 12q13.13 | -0.298763417 | 4.86E-05 | 0.000286 |
| GRM7     | 3p26.1   | -0.298759008 | 4.86E-05 | 0.000286 |
| NUDT11   | Xp11.22  | -0.298744586 | 4.86E-05 | 0.000286 |
| IARS     | 9q22.31  | -0.298740401 | 4.86E-05 | 0.000286 |

|           |           |              |          |          |
|-----------|-----------|--------------|----------|----------|
| GLRX2     | 1q31.2    | 0.298629506  | 4.9E-05  | 0.000288 |
| PBDC1     | Xq13.3    | 0.29861486   | 4.9E-05  | 0.000288 |
| FBXO31    | 16q24.2   | -0.298516519 | 4.93E-05 | 0.00029  |
| SERPINF2  | 17p13.3   | -0.298447471 | 4.95E-05 | 0.000291 |
| TAPT1     | 4p15.32   | -0.298445379 | 4.95E-05 | 0.000291 |
| GADD45GIF | 19p13.13  | 0.298386793  | 4.97E-05 | 0.000292 |
| RB1CC1    | 8q11.23   | -0.298382608 | 4.97E-05 | 0.000292 |
| STOM      | 9q33.2    | -0.298380516 | 4.97E-05 | 0.000292 |
| EPB41L2   | 6q23.1-q2 | -0.298370054 | 4.98E-05 | 0.000292 |
| ZNF540    | 19q13.12  | -0.298309376 | 4.99E-05 | 0.000293 |
| CREBRF    | 5q35.1    | -0.298271713 | 5.01E-05 | 0.000293 |
| PGM5      | 9q21.11   | -0.298269621 | 5.01E-05 | 0.000293 |
| MANCR     | 10p15.1   | 0.298263712  | 5.01E-05 | 0.000293 |
| TTC31     | 2p13.1    | 0.298263344  | 5.01E-05 | 0.000293 |
| RC3H1     | 1q25.1    | -0.298248698 | 5.01E-05 | 0.000293 |
| MPP2      | 17q21.31  | -0.298160819 | 5.04E-05 | 0.000295 |
| TRPT1     | 11q13.1   | 0.298031092  | 5.08E-05 | 0.000297 |
| PTPRB     | 12q15     | -0.298014354 | 5.09E-05 | 0.000297 |
| ST8SIA1   | 12p12.1   | -0.297869981 | 5.13E-05 | 0.0003   |
| NEU3      | 11q13.4   | -0.29785115  | 5.14E-05 | 0.0003   |
| MFSD5     | 12q13.13  | 0.297849057  | 5.14E-05 | 0.0003   |
| ENPP5     | 6p21.1    | -0.297794656 | 5.15E-05 | 0.000301 |
| PRKD1     | 14q12     | -0.297792564 | 5.15E-05 | 0.000301 |
| CEP83     | 12q22     | -0.297746532 | 5.17E-05 | 0.000302 |
| OGDHL     | 10q11.23  | -0.297740255 | 5.17E-05 | 0.000302 |
| AMACR     | 5p13.2    | -0.297725608 | 5.18E-05 | 0.000302 |
| APOLD1    | 12p13.1   | -0.297673299 | 5.19E-05 | 0.000303 |
| ATP6V1E2  | 2p21 2p16 | -0.297669115 | 5.19E-05 | 0.000303 |
| MAML1     | 5q35.3    | -0.297472433 | 5.26E-05 | 0.000306 |
| GALNT14   | 2p23.1    | 0.297436863  | 5.27E-05 | 0.000307 |
| FAN1      | 15q13.3   | -0.29738037  | 5.29E-05 | 0.000308 |
| SHFL      | 19p13.2   | 0.297376185  | 5.29E-05 | 0.000308 |
| WHRN      | 9q32      | -0.297372    | 5.29E-05 | 0.000308 |
| C1GALT1   | 7p22.1-p2 | 0.297102086  | 5.38E-05 | 0.000313 |
| MCTP1     | 5q15      | -0.29705187  | 5.39E-05 | 0.000314 |
| PVT1      | 8q24.21   | 0.297045592  | 5.39E-05 | 0.000314 |
| RSPO3     | 6q22.33   | -0.2970435   | 5.39E-05 | 0.000314 |
| TDRD9     | 14q32.33  | -0.296922299 | 5.43E-05 | 0.000316 |
| CMTM1     | 16q21     | 0.296761032  | 5.49E-05 | 0.000319 |
| MAP1A     | 15q15.3   | -0.296719185 | 5.5E-05  | 0.00032  |
| PCDHGA2   | 5q31.3    | -0.296691984 | 5.51E-05 | 0.00032  |
| SAMHD1    | 20q11.23  | -0.296639675 | 5.53E-05 | 0.000321 |
| ZNF175    | 19q13.41  | -0.296589459 | 5.54E-05 | 0.000322 |
| EPSTI1    | 13q14.11  | 0.296560166  | 5.55E-05 | 0.000322 |
| RBBP4     | 1p35.1    | -0.296560166 | 5.55E-05 | 0.000322 |
| C15ORF48  | 15q21.1   | 0.296507857  | 5.57E-05 | 0.000323 |
| MGST3     | 1q24.1    | 0.296409516  | 5.61E-05 | 0.000325 |
| STXBP4    | 17q22     | -0.296392777 | 5.61E-05 | 0.000325 |
| STK31     | 7p15.3    | 0.296388592  | 5.61E-05 | 0.000325 |
| CDC6      | 17q21.2   | 0.296367669  | 5.62E-05 | 0.000326 |
| HIST1H2BJ | 6p22.1    | 0.296355115  | 5.62E-05 | 0.000326 |
| AN05      | 11p14.3   | -0.29635093  | 5.63E-05 | 0.000326 |
| DCLK1     | 13q13.3   | -0.296346745 | 5.63E-05 | 0.000326 |
| DDI2      | 1p36.21   | -0.296298621 | 5.64E-05 | 0.000327 |



|           |            |               |           |           |
|-----------|------------|---------------|-----------|-----------|
| NXF3      | Xq22. 1    | 0. 296269637  | 5. 65E-05 | 0. 000327 |
| ALDH6A1   | 14q24. 3   | -0. 296260959 | 5. 66E-05 | 0. 000327 |
| DCLK2     | 4q31. 23-c | -0. 29624422  | 5. 66E-05 | 0. 000327 |
| C6ORF58   | 6q22. 33   | -0. 296209477 | 5. 67E-05 | 0. 000328 |
| DNAH7     | 2q32. 3    | -0. 296206557 | 5. 68E-05 | 0. 000328 |
| TATDN3    | 1q32. 3    | -0. 296198188 | 5. 68E-05 | 0. 000328 |
| PDZRN3    | 3p13       | -0. 296175172 | 5. 69E-05 | 0. 000328 |
| NPHS1     | 19q13. 12  | -0. 296156947 | 5. 69E-05 | 0. 000329 |
| SMU1      | 9p21. 1    | -0. 296058    | 5. 73E-05 | 0. 00033  |
| ITGA7     | 12q13. 2   | -0. 295963844 | 5. 76E-05 | 0. 000332 |
| AKAP8     | 19p13. 12  | 0. 295959659  | 5. 76E-05 | 0. 000332 |
| STRA6     | 15q24. 1   | 0. 295878057  | 5. 79E-05 | 0. 000334 |
| MICOS13   | 19p13. 3   | 0. 295867596  | 5. 79E-05 | 0. 000334 |
| PLAC1     | Xq26. 3    | 0. 295837967  | 5. 8E-05  | 0. 000334 |
| LAMA1     | 18p11. 31  | -0. 295802733 | 5. 82E-05 | 0. 000335 |
| NAP1L1    | 12q21. 2   | -0. 295752516 | 5. 83E-05 | 0. 000336 |
| C6ORF163  | 6q15       | -0. 29574895  | 5. 83E-05 | 0. 000336 |
| BRAP      | 12q24. 12  | -0. 295696022 | 5. 85E-05 | 0. 000337 |
| HNRNPH2   | Xq22. 1    | -0. 295677191 | 5. 86E-05 | 0. 000337 |
| AGGF1     | 5q13. 3    | -0. 295637436 | 5. 87E-05 | 0. 000338 |
| PCDHA8    | 5q31. 3    | -0. 295634654 | 5. 87E-05 | 0. 000338 |
| GPX2      | 14q23. 3   | 0. 295618605  | 5. 88E-05 | 0. 000338 |
| AGAP2-AS1 | 12q14. 1   | 0. 295610236  | 5. 88E-05 | 0. 000338 |
| PPIP5K2   | 5q21. 1    | -0. 295603959 | 5. 89E-05 | 0. 000338 |
| ROB04     | 11q24. 2   | -0. 295574666 | 5. 9E-05  | 0. 000339 |
| NARS2     | 11q14. 1   | -0. 295572573 | 5. 9E-05  | 0. 000339 |
| HIPK3     | 11p13      | -0. 295564204 | 5. 9E-05  | 0. 000339 |
| ZNF565    | 19q13. 12  | 0. 295520264  | 5. 92E-05 | 0. 00034  |
| CENPK     | 5q12. 3    | 0. 295509803  | 5. 92E-05 | 0. 00034  |
| A1BG-AS1  | 19q13. 43  | -0. 295497249 | 5. 92E-05 | 0. 00034  |
| VIPR2     | 7q36. 3    | -0. 295490971 | 5. 93E-05 | 0. 00034  |
| PIH1D1    | 19q13. 33  | 0. 295476325  | 5. 93E-05 | 0. 00034  |
| KLHL5     | 4p14       | -0. 295424016 | 5. 95E-05 | 0. 000341 |
| QSOX1     | 1q25. 2    | 0. 295424016  | 5. 95E-05 | 0. 000341 |
| MIR4697HC | 11q25      | 0. 295411462  | 5. 95E-05 | 0. 000341 |
| KIAA2026  | 9p24. 1    | -0. 295352876 | 5. 98E-05 | 0. 000342 |
| ZNF551    | 19q13. 43  | -0. 295342414 | 5. 98E-05 | 0. 000342 |
| POLR2B    | 4q12       | -0. 295319398 | 5. 99E-05 | 0. 000343 |
| USP39     | 2p11. 2    | 0. 295191764  | 6. 03E-05 | 0. 000345 |
| KLRD1     | 12p13. 2   | -0. 295191764 | 6. 03E-05 | 0. 000345 |
| TMEM216   | 11q12. 2   | 0. 295177118  | 6. 04E-05 | 0. 000345 |
| TGFB1I1   | 16p11. 2   | 0. 295160379  | 6. 05E-05 | 0. 000346 |
| FSTL3     | 19p13. 3   | 0. 295160379  | 6. 05E-05 | 0. 000346 |
| PAR6G-AS1 | 18q23      | -0. 295118532 | 6. 06E-05 | 0. 000346 |
| ASXL1     | 20q11. 21  | -0. 295051577 | 6. 08E-05 | 0. 000348 |
| ANGPTL5   | 11q22. 1   | -0. 295044869 | 6. 09E-05 | 0. 000348 |
| CRY2      | 11p11. 2   | -0. 295003452 | 6. 1E-05  | 0. 000348 |
| HSPB11    | 1p32. 3    | 0. 294982529  | 6. 11E-05 | 0. 000349 |
| FZD3      | 8p21. 1    | -0. 29489465  | 6. 14E-05 | 0. 00035  |
| OPLAH     | 8q24. 3    | 0. 294873726  | 6. 15E-05 | 0. 000351 |
| FANCM     | 14q21. 2   | -0. 294869542 | 6. 15E-05 | 0. 000351 |
| FAM111A   | 11q12. 1   | 0. 29478794   | 6. 18E-05 | 0. 000352 |
| SCAMP2    | 15q24. 1   | 0. 294725169  | 6. 21E-05 | 0. 000354 |
| MOCOS     | 18q12. 2   | 0. 294693784  | 6. 22E-05 | 0. 000354 |

|                       |                       |              |          |          |
|-----------------------|-----------------------|--------------|----------|----------|
| FDPS                  | 1q22                  | 0.294677045  | 6.22E-05 | 0.000354 |
| SPAG6                 | 10p12.2               | -0.294641879 | 6.24E-05 | 0.000355 |
| LRRC4                 | 7q32.1                | -0.294607997 | 6.25E-05 | 0.000356 |
| RPP14                 | 3p14.3                | -0.29459335  | 6.26E-05 | 0.000356 |
| YIF1B                 | 19q13.2               | 0.294509656  | 6.29E-05 | 0.000358 |
| KCNJ3                 | 2q24.1                | -0.294493329 | 6.29E-05 | 0.000358 |
| SLC9A2                | 2q12.1                | 0.294489933  | 6.29E-05 | 0.000358 |
| HECTD4                | 12q24.13              | -0.294384115 | 6.33E-05 | 0.00036  |
| ZBTB16                | 11q23.2               | -0.294352729 | 6.35E-05 | 0.000361 |
| MIR205HG              | 1q32.2                | 0.29434407   | 6.35E-05 | 0.000361 |
| USP54                 | 10q22.2               | 0.294340175  | 6.35E-05 | 0.000361 |
| FGF20                 | 8p22                  | 0.294318896  | 6.36E-05 | 0.000361 |
| ADAM9                 | 8p11.22               | 0.294315067  | 6.36E-05 | 0.000361 |
| PRB1                  | 12p13.2               | 0.294302862  | 6.37E-05 | 0.000361 |
| SNN                   | 16p13.13              | -0.294298328 | 6.37E-05 | 0.000361 |
| PEX5                  | 12p13.31              | -0.294235558 | 6.39E-05 | 0.000362 |
| NOMO1                 | 16p13.11              | -0.29409537  | 6.45E-05 | 0.000365 |
| SCN4A                 | 17q23.3               | -0.294055859 | 6.46E-05 | 0.000366 |
| ZNF700                | 19p13.2               | 0.294043061  | 6.47E-05 | 0.000366 |
| HS3ST3B1              | 17p12                 | -0.294003306 | 6.48E-05 | 0.000367 |
| FAM161A               | 2p15                  | -0.293982382 | 6.49E-05 | 0.000367 |
| GRM1                  | 6q24.3                | -0.293980632 | 6.49E-05 | 0.000367 |
| NIN                   | 14q22.1               | -0.293978198 | 6.49E-05 | 0.000367 |
| DZIP1                 | 13q32.1               | -0.293969828 | 6.49E-05 | 0.000367 |
| PHETA1                | 12q24.12              | 0.293911242  | 6.52E-05 | 0.000369 |
| FNBP1                 | 9q34.11               | -0.293804532 | 6.56E-05 | 0.000371 |
| BANF1                 | 11q13.1               | 0.293779424  | 6.57E-05 | 0.000371 |
| NOTCH2NL <sup>A</sup> | 1q21.1                | 0.293752223  | 6.58E-05 | 0.000372 |
| AKR1C3                | 10p15.1               | 0.293750131  | 6.58E-05 | 0.000372 |
| PAK1                  | 11q13.5-c             | 0.293710376  | 6.6E-05  | 0.000373 |
| RYR3                  | 15q13.3-c             | -0.293678991 | 6.61E-05 | 0.000373 |
| DMKN                  | 19q13.12              | 0.293664344  | 6.61E-05 | 0.000373 |
| HPCAL4                | 1p34.2                | -0.293656955 | 6.62E-05 | 0.000373 |
| GPR158                | 10p12.1               | -0.293605758 | 6.64E-05 | 0.000375 |
| B3GALNT2              | 1q42.3                | -0.293601573 | 6.64E-05 | 0.000375 |
| ADD2                  | 2p13.3                | -0.293568096 | 6.65E-05 | 0.000375 |
| ACBD6                 | 1q25.2-q <sub>2</sub> | 0.29350114   | 6.68E-05 | 0.000377 |
| SLC38A4               | 12q13.11              | -0.29343     | 6.71E-05 | 0.000378 |
| STRIP2                | 7q32.1                | 0.293381876  | 6.73E-05 | 0.000379 |
| BTG1                  | 12q21.33              | -0.293350491 | 6.74E-05 | 0.00038  |
| TGIF1                 | 18p11.31              | 0.293312828  | 6.75E-05 | 0.00038  |
| HOXC4                 | 12q13.13              | 0.293293997  | 6.76E-05 | 0.000381 |
| HMGA2                 | 12q14.3               | 0.29325215   | 6.78E-05 | 0.000382 |
| C8ORF37               | 8q22.1                | -0.293199841 | 6.8E-05  | 0.000383 |
| GFRA2                 | 8p21.3                | -0.293197749 | 6.8E-05  | 0.000383 |
| DNASE1L3              | 3p14.3                | -0.293196144 | 6.8E-05  | 0.000383 |
| FARSB                 | 2q36.1                | 0.293178917  | 6.81E-05 | 0.000383 |
| CREB3L1               | 11p11.2               | 0.2930743    | 6.85E-05 | 0.000385 |
| ERO1B                 | 1q42.3                | -0.293068023 | 6.85E-05 | 0.000385 |
| TMEM220               | 17p13.1               | -0.293005252 | 6.88E-05 | 0.000386 |
| LMO3                  | 12p12.3               | -0.292898542 | 6.92E-05 | 0.000389 |
| POF1B                 | Xq21.1                | 0.292883895  | 6.93E-05 | 0.000389 |
| LRRN2                 | 1q32.1                | -0.292839956 | 6.95E-05 | 0.00039  |
| AMER2                 | 13q12.13              | -0.2928281   | 6.95E-05 | 0.00039  |

|                  |              |          |          |
|------------------|--------------|----------|----------|
| LOC100130142.13  | -0.292812755 | 6.96E-05 | 0.00039  |
| CALM2 2p21       | 0.292787647  | 6.97E-05 | 0.000391 |
| CSMD3 8q23.3     | -0.292784845 | 6.97E-05 | 0.000391 |
| SUOX 12q13.2     | -0.292724876 | 7E-05    | 0.000392 |
| TPX2 20q11.21    | 0.292718599  | 7E-05    | 0.000392 |
| AP2S1 19q13.32   | 0.292653736  | 7.03E-05 | 0.000394 |
| DTX2P1-UF7q11.23 | 0.292641182  | 7.03E-05 | 0.000394 |
| IQUB 7q31.32     | -0.292588873 | 7.05E-05 | 0.000395 |
| LRIG1 3p14.1     | -0.292563765 | 7.06E-05 | 0.000395 |
| ZNF354C 5q35.3   | -0.29255958  | 7.07E-05 | 0.000395 |
| FGF12 3q28-q29   | -0.29255121  | 7.07E-05 | 0.000395 |
| SLC25A32 8q22.3  | -0.292521917 | 7.08E-05 | 0.000396 |
| LMBRD2 5p13.2    | -0.292496809 | 7.09E-05 | 0.000397 |
| KLHL28 14q21.2   | -0.292490532 | 7.09E-05 | 0.000397 |
| GABARAP 17p13.1  | -0.292440316 | 7.12E-05 | 0.000398 |
| SF3B2 11q13.1    | 0.292404745  | 7.13E-05 | 0.000398 |
| MAD1L1 7p22.3    | 0.292362898  | 7.15E-05 | 0.000399 |
| FGFRL1 4p16.3    | 0.292348252  | 7.16E-05 | 0.000399 |
| MED13 17q23.2    | -0.292333605 | 7.16E-05 | 0.0004   |
| RIMBP2 12q24.33  | -0.292283542 | 7.18E-05 | 0.000401 |
| LINC018812q37.3  | -0.292275019 | 7.19E-05 | 0.000401 |
| ACOT11 1p32.3    | 0.292214341  | 7.21E-05 | 0.000402 |
| CACNA1F Xp11.23  | 0.292116     | 7.26E-05 | 0.000404 |
| TRIM24 7q33-q34  | -0.292103446 | 7.26E-05 | 0.000405 |
| ZNF718 4p16.3    | -0.292090892 | 7.27E-05 | 0.000405 |
| LRP1B 2q22.1-q23 | -0.292067379 | 7.28E-05 | 0.000405 |
| TBL3 16p13.3     | 0.292003013  | 7.3E-05  | 0.000407 |
| ADNP 20q13.13    | -0.291931873 | 7.34E-05 | 0.000408 |
| MRAP 21q22.11    | -0.291927913 | 7.34E-05 | 0.000408 |
| SLC16A4 1p13.3   | 0.291919319  | 7.34E-05 | 0.000408 |
| WDR55 5q31.3     | 0.29190258   | 7.35E-05 | 0.000409 |
| BCL6B 17p13.1    | -0.291892118 | 7.35E-05 | 0.000409 |
| HEMGN 9q22.33    | -0.291871339 | 7.36E-05 | 0.000409 |
| SPATA12 3p14.3   | 0.291851232  | 7.37E-05 | 0.00041  |
| FAM102B 1p13.3   | -0.29183144  | 7.38E-05 | 0.00041  |
| GRIA3 Xq25       | -0.291774946 | 7.4E-05  | 0.000411 |
| TRPV4 12q24.11   | 0.291747745  | 7.42E-05 | 0.000412 |
| PTPN12 7q11.23   | 0.291739376  | 7.42E-05 | 0.000412 |
| CACNB4 2q23.3    | -0.291651497 | 7.46E-05 | 0.000414 |
| PLCZ1 12p12.3    | 0.291626722  | 7.47E-05 | 0.000414 |
| NBL1 1p36.13     | 0.291597096  | 7.48E-05 | 0.000415 |
| PATZ1 22q12.2    | -0.291551064 | 7.5E-05  | 0.000416 |
| TENM3 4q34.3-q35 | -0.291540602 | 7.51E-05 | 0.000416 |
| ATL1 14q22.1     | -0.29153851  | 7.51E-05 | 0.000416 |
| GPN3 12q24.11    | -0.29149457  | 7.53E-05 | 0.000417 |
| ROPN1L 5p15.2    | -0.291493782 | 7.53E-05 | 0.000417 |
| SYNJ1 21q22.11   | -0.291419245 | 7.56E-05 | 0.000419 |
| SAMD12 8q24.11-c | 0.291392045  | 7.57E-05 | 0.000419 |
| TMEM74 8q23.1    | -0.291389219 | 7.58E-05 | 0.000419 |
| FBLN5 14q32.12   | -0.291327182 | 7.6E-05  | 0.000421 |
| ZBTB8B 1p35.1    | -0.291291702 | 7.62E-05 | 0.000422 |
| PLAU 10q22.2     | 0.291199548  | 7.66E-05 | 0.000424 |
| CAPRN2 12p11.21  | 0.291189086  | 7.67E-05 | 0.000424 |
| KIAA1958 9q32    | -0.291168163 | 7.68E-05 | 0.000424 |

|           |          |              |          |          |
|-----------|----------|--------------|----------|----------|
| ZDHC6     | 10q25.2  | 0.291107484  | 7.7E-05  | 0.000426 |
| TYMP      | 22q13.33 | 0.2911033    | 7.71E-05 | 0.000426 |
| UGT1A7    | 2q37.1   | 0.291099541  | 7.71E-05 | 0.000426 |
| DAAM1     | 14q23.1  | -0.291084468 | 7.71E-05 | 0.000426 |
| HIST1H2BK | 6p22.1   | 0.291078191  | 7.72E-05 | 0.000426 |
| DAND5     | 19p13.13 | 0.291051241  | 7.73E-05 | 0.000427 |
| CYTOR     | 2p11.2   | 0.291013328  | 7.75E-05 | 0.000427 |
| TIGD4     | 4q31.3   | -0.290998682 | 7.75E-05 | 0.000428 |
| IMPAD1    | 8q12.1   | -0.290977758 | 7.76E-05 | 0.000428 |
| FASTKD3   | 5p15.31  | -0.290935911 | 7.78E-05 | 0.000429 |
| RNASET2   | 6q27     | 0.290931726  | 7.78E-05 | 0.000429 |
| AGTR1     | 3q24     | -0.290914988 | 7.79E-05 | 0.000429 |
| CTNND1    | 11q12.1  | 0.290822924  | 7.83E-05 | 0.000431 |
| ACVR1C    | 2q24.1   | -0.290820832 | 7.84E-05 | 0.000431 |
| IFT74     | 9p21.2   | -0.290781077 | 7.85E-05 | 0.000432 |
| ALDOC     | 17q11.2  | 0.290724583  | 7.88E-05 | 0.000434 |
| FLI1      | 11q24.3  | -0.290699475 | 7.89E-05 | 0.000434 |
| SLC6A16   | 19q13.33 | -0.290611596 | 7.93E-05 | 0.000436 |
| TNRC6A    | 16p12.1  | -0.290611596 | 7.93E-05 | 0.000436 |
| ISCU      | 12q23.3  | -0.290607411 | 7.94E-05 | 0.000436 |
| ZNF415    | 19q13.42 | -0.290534179 | 7.97E-05 | 0.000438 |
| PDZD7     | 10q24.31 | 0.290479777  | 8E-05    | 0.000439 |
| GABRP     | 5q35.1   | 0.290463039  | 8E-05    | 0.00044  |
| CCDC87    | 11q13.2  | -0.290419251 | 8.02E-05 | 0.000441 |
| PDLIM2    | 8p21.3   | 0.290414914  | 8.03E-05 | 0.000441 |
| GLOD5     | Xp11.23  | 0.290398175  | 8.03E-05 | 0.000441 |
| RFPL4A    | 19q13.42 | -0.290395083 | 8.04E-05 | 0.000441 |
| SPOCD1    | 1p35.2   | 0.290364698  | 8.05E-05 | 0.000442 |
| BEX2      | Xq22.2   | -0.290352144 | 8.06E-05 | 0.000442 |
| ARL5A     | 2q23.3   | -0.290310296 | 8.08E-05 | 0.000443 |
| NSDHL     | Xq28     | 0.290308204  | 8.08E-05 | 0.000443 |
| AP2A1     | 19q13.33 | 0.290297742  | 8.08E-05 | 0.000443 |
| TFG       | 3q12.2   | 0.290257988  | 8.1E-05  | 0.000444 |
| PCED1B    | 12q13.11 | 0.290207771  | 8.13E-05 | 0.000445 |
| FLII      | 17p11.2  | 0.290201494  | 8.13E-05 | 0.000445 |
| RILP      | 17p13.3  | 0.290201494  | 8.13E-05 | 0.000445 |
| MFSD2A    | 1p34.2   | 0.290147093  | 8.15E-05 | 0.000446 |
| PLA2G4F   | 15q15.1  | 0.290142908  | 8.16E-05 | 0.000446 |
| PIK3C2B   | 1q32.1   | 0.290132446  | 8.16E-05 | 0.000446 |
| CHAF1A    | 19p13.3  | 0.290113615  | 8.17E-05 | 0.000447 |
| FOXC1     | 6p25.3   | 0.290090599  | 8.18E-05 | 0.000447 |
| DCX       | Xq23     | -0.290019585 | 8.22E-05 | 0.000449 |
| ARMC1     | 8q13.1   | -0.290008997 | 8.22E-05 | 0.000449 |
| LARS      | 5q32     | -0.289990166 | 8.23E-05 | 0.000449 |
| CASP4     | 11q22.3  | 0.289975519  | 8.24E-05 | 0.00045  |
| KCNB2     | 8q21.11  | -0.289947167 | 8.25E-05 | 0.00045  |
| HUWE1     | Xp11.22  | -0.289937857 | 8.26E-05 | 0.000451 |
| SLC9A3R2  | 16p13.3  | 0.289927395  | 8.26E-05 | 0.000451 |
| ZNF17     | 19q13.43 | -0.289908564 | 8.27E-05 | 0.000451 |
| TRIM10    | 6p22.1   | 0.28985947   | 8.29E-05 | 0.000452 |
| SULT1C4   | 2q12.3   | -0.289858347 | 8.3E-05  | 0.000452 |
| FBX015    | 18q22.3  | -0.289843701 | 8.3E-05  | 0.000452 |
| ADM       | 11p15.4  | 0.28971816   | 8.36E-05 | 0.000456 |
| PDCD10    | 3q26.1   | 0.289695144  | 8.38E-05 | 0.000456 |

|           |          |              |          |          |
|-----------|----------|--------------|----------|----------|
| AKAP3     | 12p13.32 | -0.28967422  | 8.39E-05 | 0.000457 |
| PCA3      | 9q21.2   | -0.289621637 | 8.41E-05 | 0.000458 |
| ATP1B2    | 17p13.1  | -0.28960308  | 8.42E-05 | 0.000458 |
| SLC35E3   | 12q15    | -0.289577972 | 8.43E-05 | 0.000459 |
| UCHL3     | 13q22.2  | 0.289565418  | 8.44E-05 | 0.000459 |
| C3ORF18   | 3p21.31  | -0.289557048 | 8.44E-05 | 0.000459 |
| EPM2AIP1  | 3p22.2   | -0.289504739 | 8.47E-05 | 0.00046  |
| GS1-124KE | 7q11.21  | 0.289464984  | 8.49E-05 | 0.000461 |
| BBS5      | 2q31.1   | -0.289439876 | 8.5E-05  | 0.000462 |
| SLC29A4   | 7p22.1   | -0.28941686  | 8.51E-05 | 0.000462 |
| ZNF131    | 5p12     | -0.289383383 | 8.53E-05 | 0.000463 |
| PTX3      | 3q25.32  | -0.289280857 | 8.58E-05 | 0.000466 |
| PGBD1     | 6p22.1   | -0.289253808 | 8.6E-05  | 0.000467 |
| HFM1      | 1p22.2   | -0.289181621 | 8.63E-05 | 0.000468 |
| R3HDM1    | 2q21.3   | -0.289046513 | 8.7E-05  | 0.000472 |
| RAB3IP    | 12q15    | -0.289023497 | 8.71E-05 | 0.000473 |
| ISG20     | 15q26.1  | 0.289008851  | 8.72E-05 | 0.000473 |
| MACROD1   | 11q13.1  | 0.289002574  | 8.73E-05 | 0.000473 |
| REEP4     | 8p21.3   | 0.289000481  | 8.73E-05 | 0.000473 |
| CCL3L3    | 17q12    | -0.288986367 | 8.73E-05 | 0.000473 |
| ORC6      | 16q11.2  | 0.288967004  | 8.74E-05 | 0.000473 |
| SLC19A1   | 21q22.3  | 0.288933526  | 8.76E-05 | 0.000474 |
| DCT       | 13q32.1  | -0.288899817 | 8.78E-05 | 0.000475 |
| CGNL1     | 15q21.3  | -0.288860293 | 8.8E-05  | 0.000476 |
| GTF3C4    | 9q34.13  | -0.288816354 | 8.82E-05 | 0.000477 |
| ZNF682    | 19p12    | -0.288770322 | 8.85E-05 | 0.000478 |
| RBPJ      | 4p15.2   | -0.288761953 | 8.85E-05 | 0.000478 |
| ZNF69     | 19p13.2  | 0.288730567  | 8.87E-05 | 0.000479 |
| CDCA4     | 14q32.33 | 0.288726383  | 8.87E-05 | 0.000479 |
| A2M-AS1   | 12p13.31 | -0.28872429  | 8.87E-05 | 0.000479 |
| ELOVL6    | 4q25     | 0.288713828  | 8.87E-05 | 0.000479 |
| DDX60     | 4q32.3   | 0.288680351  | 8.89E-05 | 0.00048  |
| IPO11     | 5q12.1   | -0.288651058 | 8.91E-05 | 0.000481 |
| NRP1      | 10p11.22 | -0.288648965 | 8.91E-05 | 0.000481 |
| PCSK9     | 1p32.3   | 0.288613395  | 8.93E-05 | 0.000482 |
| POLD1     | 19q13.33 | 0.28851087   | 8.98E-05 | 0.000484 |
| LRRFIP1   | 2q37.3   | 0.288487854  | 8.99E-05 | 0.000485 |
| USP38     | 4q31.21  | -0.288454376 | 9.01E-05 | 0.000486 |
| KCNA1     | 12p13.32 | -0.28845253  | 9.01E-05 | 0.000486 |
| TPCN1     | 12q24.13 | -0.288450191 | 9.01E-05 | 0.000486 |
| C22ORF39  | 22q11.21 | -0.28843136  | 9.02E-05 | 0.000486 |
| FAM133B   | 7q21.2   | -0.288399975 | 9.04E-05 | 0.000487 |
| AGTR2     | Xq23     | -0.288380163 | 9.05E-05 | 0.000487 |
| RFX8      | 2q11.2   | 0.288333019  | 9.08E-05 | 0.000488 |
| ALPL      | 1p36.12  | -0.288326742 | 9.08E-05 | 0.000488 |
| DNAAF3    | 19q13.42 | 0.288268156  | 9.11E-05 | 0.00049  |
| SLIT2     | 4p15.31  | -0.288251418 | 9.12E-05 | 0.00049  |
| AKR1B15   | 7q33     | 0.288245854  | 9.12E-05 | 0.00049  |
| FCHSD1    | 5q31.3   | 0.288236771  | 9.13E-05 | 0.000491 |
| KIF27     | 9q21.32  | -0.288228402 | 9.13E-05 | 0.000491 |
| LMBR1     | 7q36.3   | -0.288098676 | 9.2E-05  | 0.000494 |
| SLC27A1   | 19p13.11 | 0.288094491  | 9.2E-05  | 0.000494 |
| LPAR1     | 9q31.3   | -0.288023351 | 9.24E-05 | 0.000496 |
| VWA3A     | 16p12.2  | 0.287934674  | 9.29E-05 | 0.000499 |

|           |           |              |          |          |
|-----------|-----------|--------------|----------|----------|
| CASP6     | 4q25      | 0.287858055  | 9.33E-05 | 0.000501 |
| NP1PB3    | 16p12.2   | 0.287835039  | 9.34E-05 | 0.000501 |
| PKD2      | 4q22.1    | -0.287824577 | 9.35E-05 | 0.000501 |
| HAAO      | 2p21      | -0.287780637 | 9.37E-05 | 0.000503 |
| HSPA8     | 11q24.1   | -0.28777436  | 9.38E-05 | 0.000503 |
| CDC42EP1  | 22q13.1   | 0.287759714  | 9.39E-05 | 0.000503 |
| ANGPT1    | 8q23.1    | -0.287740883 | 9.4E-05  | 0.000503 |
| HMOX2     | 16p13.3   | 0.287701128  | 9.42E-05 | 0.000504 |
| TFCP2L1   | 2q14.2    | 0.287688574  | 9.43E-05 | 0.000505 |
| P2RX5     | 17p13.2   | -0.287634172 | 9.46E-05 | 0.000506 |
| NME5      | 5q31.2    | -0.287615341 | 9.47E-05 | 0.000507 |
| PIFO      | 1p13.2    | -0.287575586 | 9.49E-05 | 0.000508 |
| ZNF248    | 10p11.21  | -0.287573494 | 9.49E-05 | 0.000508 |
| CCDC102B  | 18q22.1-c | -0.287563032 | 9.5E-05  | 0.000508 |
| YWHAZ     | 8q22.3    | 0.287544201  | 9.51E-05 | 0.000508 |
| HDAC7     | 12q13.11  | 0.287479338  | 9.54E-05 | 0.00051  |
| SNX29     | 16p13.13- | -0.287393551 | 9.59E-05 | 0.000512 |
| ERBB4     | 2q34      | -0.287355594 | 9.61E-05 | 0.000513 |
| PDZD2     | 5p13.3    | -0.287324504 | 9.63E-05 | 0.000514 |
| SCRN2     | 17q21.32  | 0.287293118  | 9.65E-05 | 0.000515 |
| CSRNP2    | 12q13.12  | -0.287270102 | 9.66E-05 | 0.000516 |
| SLC26A9   | 1q32.1    | 0.287261733  | 9.66E-05 | 0.000516 |
| DDX6      | 11q23.3   | -0.287238717 | 9.68E-05 | 0.000516 |
| CDC48     | 1p34.3    | 0.287215701  | 9.69E-05 | 0.000517 |
| MOGAT2    | 11q13.5   | 0.287200796  | 9.7E-05  | 0.000517 |
| CTSG      | 14q12     | -0.287197943 | 9.7E-05  | 0.000517 |
| PFDN6     | 6p21.32   | 0.287171762  | 9.72E-05 | 0.000518 |
| FAM171A1  | 10p13     | -0.287167577 | 9.72E-05 | 0.000518 |
| HSP90B1   | 12q23.3   | -0.28712573  | 9.74E-05 | 0.000519 |
| RAP2B     | 3q25.2    | 0.287108991  | 9.75E-05 | 0.000519 |
| FAM71D    | 14q23.3   | 0.28704622   | 9.79E-05 | 0.000521 |
| C50RF64   | 5q12.1    | -0.287039169 | 9.79E-05 | 0.000521 |
| TMOD3     | 15q21.2   | 0.287025297  | 9.8E-05  | 0.000521 |
| CCDC68    | 18q21.2   | 0.287014835  | 9.8E-05  | 0.000521 |
| SMAD2     | 18q21.1   | -0.286977172 | 9.83E-05 | 0.000522 |
| RPL23AP53 | 8p23.3    | -0.286956249 | 9.84E-05 | 0.000523 |
| B4GALT5   | 20q13.13  | 0.286922771  | 9.86E-05 | 0.000524 |
| DALRD3    | 3p21.31   | 0.286855816  | 9.9E-05  | 0.000526 |
| SPRY1     | 4q28.1    | -0.286740736 | 9.96E-05 | 0.000529 |
| TMEM41B   | 11p15.4   | 0.286723997  | 9.97E-05 | 0.00053  |
| KCNK5     | 6p21.2    | 0.286705166  | 9.98E-05 | 0.00053  |
| DENND4A   | 15q22.31  | -0.286675873 | 0.0001   | 0.000531 |
| SPAG5     | 17q11.2   | 0.286669596  | 0.0001   | 0.000531 |
| SMPD3     | 16q22.1   | 0.286615195  | 0.0001   | 0.000532 |
| TAF1D     | 11q21     | 0.286590086  | 0.000101 | 0.000533 |
| ZNRF3     | 22q12.1   | -0.286583809 | 0.000101 | 0.000533 |
| SGSM2     | 17p13.3   | -0.286518946 | 0.000101 | 0.000535 |
| PRICKLE4  | 6p21.1    | 0.286514762  | 0.000101 | 0.000535 |
| ZNF418    | 19q13.43  | -0.286462603 | 0.000101 | 0.000536 |
| ACTR6     | 12q23.1   | -0.286441529 | 0.000101 | 0.000537 |
| HSF1      | 8q24.3    | 0.286437344  | 0.000101 | 0.000537 |
| LILRB5    | 19q13.42  | -0.286403867 | 0.000102 | 0.000538 |
| ASPHD1    | 16p11.2   | 0.286401774  | 0.000102 | 0.000538 |
| GRP       | 18q21.32  | 0.286291331  | 0.000102 | 0.000541 |

|           |            |              |          |          |
|-----------|------------|--------------|----------|----------|
| CCNC      | 6q16. 2    | -0.286284602 | 0.000102 | 0.000541 |
| RHOG      | 11p15. 4   | 0.286261586  | 0.000102 | 0.000542 |
| PFKM      | 12q13. 11  | -0.286242755 | 0.000103 | 0.000542 |
| USF3      | 3q13. 2    | -0.286217647 | 0.000103 | 0.000543 |
| PLA2G2F   | 1p36. 12   | 0.286195361  | 0.000103 | 0.000543 |
| DCAF11    | 14q12      | -0.286192539 | 0.000103 | 0.000543 |
| NUDT5     | 10p14      | 0.286129768  | 0.000103 | 0.000545 |
| GGTA1P    | 9q33. 2    | -0.286125583 | 0.000103 | 0.000545 |
| PALM3     | 19p13. 12  | 0.286115121  | 0.000103 | 0.000545 |
| TCEAL5    | Xq22. 1    | -0.286106752 | 0.000103 | 0.000546 |
| LCA5      | 6q14. 1    | -0.286098383 | 0.000103 | 0.000546 |
| DET1      | 15q26. 1   | -0.286083736 | 0.000104 | 0.000546 |
| PXN       | 12q24. 23  | 0.286073274  | 0.000104 | 0.000546 |
| KPNA6     | 1p35. 2    | -0.286071182 | 0.000104 | 0.000546 |
| ARHGEF1   | 19q13. 2   | 0.286056535  | 0.000104 | 0.000546 |
| SHBG      | 17p13. 1   | -0.286008459 | 0.000104 | 0.000548 |
| PDE4A     | 19p13. 2   | 0.286002134  | 0.000104 | 0.000548 |
| GMIP      | 19p13. 11  | 0.285891239  | 0.000105 | 0.000551 |
| BARX2     | 11q24. 3   | 0.285890343  | 0.000105 | 0.000551 |
| CDYL2     | 16q23. 2   | -0.285864039 | 0.000105 | 0.000552 |
| TNR       | 1q25. 1    | -0.285849785 | 0.000105 | 0.000552 |
| SNTN      | 3p14. 2    | 0.285784016  | 0.000105 | 0.000554 |
| HEXIM1    | 17q21. 31  | 0.285778252  | 0.000105 | 0.000554 |
| SELENBP1  | 1q21. 3    | 0.285631787  | 0.000106 | 0.000559 |
| NR3C1     | 5q31. 3    | -0.285598309 | 0.000106 | 0.000556 |
| SCRIB     | 8q24. 3    | 0.285587848  | 0.000107 | 0.000556 |
| SCG2      | 2q36. 1    | -0.28551043  | 0.000107 | 0.000562 |
| ABO       | 9q34. 2    | 0.285409997  | 0.000108 | 0.000565 |
| NANS      | 9q22. 33   | 0.285386981  | 0.000108 | 0.000566 |
| BACE2     | 21q22. 2-c | 0.285347227  | 0.000108 | 0.000567 |
| IFNA8     | 9p21. 3    | 0.285304814  | 0.000108 | 0.000568 |
| VPS54     | 2p15-p14   | -0.285303287 | 0.000108 | 0.000568 |
| KRTCAP2   | 1q22       | 0.285294918  | 0.000108 | 0.000568 |
| PEX5L     | 3q26. 33   | -0.285267368 | 0.000109 | 0.000569 |
| ALKBH6    | 19q13. 12  | 0.28526144   | 0.000109 | 0.000569 |
| CDC42BPG  | 11q13. 1   | 0.285255163  | 0.000109 | 0.000569 |
| B4GAT1    | 11q13. 2   | -0.285242609 | 0.000109 | 0.00057  |
| GLS2      | 12q13. 3   | -0.28522587  | 0.000109 | 0.00057  |
| LINC00271 | 16q23. 3   | -0.285209122 | 0.000109 | 0.00057  |
| PTGER1    | 19p13. 12  | 0.285191191  | 0.000109 | 0.000571 |
| THOC6     | 16p13. 3   | 0.285179838  | 0.000109 | 0.000571 |
| MZT2A     | 2q21. 1    | 0.285165192  | 0.000109 | 0.000571 |
| UHRF1     | 19p13. 3   | 0.285125437  | 0.000109 | 0.000573 |
| FAM86HP   | 3q22. 1    | 0.285041743  | 0.00011  | 0.000575 |
| MLLT10    | 10p12. 31  | -0.285037558 | 0.00011  | 0.000575 |
| AFF1      | 4q21. 3-q2 | -0.284989434 | 0.00011  | 0.000577 |
| GEMIN6    | 2p22. 1    | 0.28496851   | 0.00011  | 0.000577 |
| ZBED6CL   | 7q36. 1    | -0.284949679 | 0.000111 | 0.000578 |
| GPR37     | 7q31. 33   | -0.284939217 | 0.000111 | 0.000578 |
| B3GAT1    | 11q25      | -0.284930997 | 0.000111 | 0.000578 |
| GATA3     | 10p14      | 0.284905739  | 0.000111 | 0.000579 |
| KLK4      | 19q13. 41  | 0.284886638  | 0.000111 | 0.000579 |
| SNX16     | 8q21. 13   | -0.284874354 | 0.000111 | 0.000579 |
| PHF11     | 13q14. 2   | 0.284865985  | 0.000111 | 0.00058  |

|           |           |              |          |          |
|-----------|-----------|--------------|----------|----------|
| COL21A1   | 6p12.1 6p | -0.28485343  | 0.000111 | 0.00058  |
| PSMB8     | 6p21.32   | 0.284838784  | 0.000111 | 0.00058  |
| CNTRL     | 9q33.2    | -0.284838784 | 0.000111 | 0.00058  |
| LCN2      | 9q34.11   | 0.284826674  | 0.000111 | 0.00058  |
| CTSH      | 15q25.1   | 0.284796937  | 0.000112 | 0.000581 |
| FAR2P1    | 2q21.1    | -0.284715335 | 0.000112 | 0.000584 |
| NOVA2     | 19q13.32  | -0.284677672 | 0.000112 | 0.000585 |
| MINPP1    | 10q23.2   | -0.284623271 | 0.000113 | 0.000587 |
| GUSBP3    | 5q13.2    | -0.284539577 | 0.000113 | 0.000589 |
| NOXA1     | 9q34.3    | 0.284535392  | 0.000113 | 0.000589 |
| IER3IP1   | 18q21.1   | -0.284485176 | 0.000114 | 0.000591 |
| IPPK      | 9q22.31   | -0.284292679 | 0.000115 | 0.000597 |
| C8ORF82   | 8q24.3    | 0.284284309  | 0.000115 | 0.000597 |
| PISD      | 22q12.2   | -0.284280125 | 0.000115 | 0.000597 |
| SQLE      | 8q24.13   | 0.284259201  | 0.000115 | 0.000598 |
| DLST      | 14q24.3   | 0.284252924  | 0.000115 | 0.000598 |
| RBM48     | 7q21.2    | -0.284246647 | 0.000115 | 0.000598 |
| EMC8      | 16q24.1   | 0.284246647  | 0.000115 | 0.000598 |
| CRTC2     | 1q21.3    | 0.284242462  | 0.000115 | 0.000598 |
| RASGEF1B  | 4q21.21   | -0.284208985 | 0.000115 | 0.000599 |
| CUL1      | 7q36.1    | -0.284144122 | 0.000116 | 0.000601 |
| MSL3P1    | 2q37.1    | 0.284093905  | 0.000116 | 0.000603 |
| WDR36     | 5q22.1    | -0.284077166 | 0.000116 | 0.000603 |
| METTTL26  | 16p13.3   | 0.284076269  | 0.000116 | 0.000603 |
| GABPA     | 21q21.3   | -0.284010211 | 0.000117 | 0.000605 |
| LINGO4    | 1q21.3    | -0.283921401 | 0.000117 | 0.000608 |
| ZNF184    | 6p22.1    | -0.283859561 | 0.000118 | 0.00061  |
| BCL2L14   | 12p13.2   | 0.283853284  | 0.000118 | 0.00061  |
| SLC31A1   | 9q32      | -0.283842822 | 0.000118 | 0.00061  |
| C11ORF1   | 11q23.1   | 0.283813529  | 0.000118 | 0.000611 |
| SPICE1    | 3q13.2    | 0.28380516   | 0.000118 | 0.000611 |
| PLA2G2A   | 1p36.13   | -0.283705921 | 0.000119 | 0.000615 |
| IFI6      | 1p35.3    | 0.283696357  | 0.000119 | 0.000615 |
| TBRG4     | 7p13      | 0.283692172  | 0.000119 | 0.000615 |
| MED12L    | 3q25.1    | -0.283636272 | 0.000119 | 0.000617 |
| DNAJB4    | 1p31.1    | -0.283614755 | 0.000119 | 0.000617 |
| RRP1      | 21q22.3   | 0.283600109  | 0.00012  | 0.000618 |
| ANLN      | 7p14.2    | 0.283570816  | 0.00012  | 0.000619 |
| SLC25A27  | 6p12.3    | -0.283566631 | 0.00012  | 0.000619 |
| DUSP23    | 1q23.2    | 0.283533153  | 0.00012  | 0.00062  |
| SERPINA1C | 14q32.13  | -0.283482702 | 0.00012  | 0.000621 |
| CUTALP    | 9q33.2    | -0.283474567 | 0.00012  | 0.000621 |
| RBBP6     | 16p12.1   | -0.283462013 | 0.000121 | 0.000622 |
| UBN2      | 7q34      | -0.283426443 | 0.000121 | 0.000623 |
| EDA2R     | Xq12      | -0.28340552  | 0.000121 | 0.000623 |
| TLR4      | 9q33.1    | -0.283330195 | 0.000121 | 0.000626 |
| DPY19L1   | 7p14.2    | 0.283307179  | 0.000122 | 0.000626 |
| REQL5     | 17q25.1   | 0.283305087  | 0.000122 | 0.000626 |
| NOP14-AS1 | 14p16.3   | 0.283298809  | 0.000122 | 0.000626 |
| B9D1      | 17p11.2   | -0.283296717 | 0.000122 | 0.000626 |
| GOPC      | 6q22.1    | -0.283244408 | 0.000122 | 0.000628 |
| USP42     | 7p22.1    | -0.283229762 | 0.000122 | 0.000629 |
| STS       | Xp22.31   | 0.28321093   | 0.000122 | 0.000629 |
| GATD1     | 11p15.5   | 0.283190007  | 0.000122 | 0.00063  |



|           |            |              |          |          |
|-----------|------------|--------------|----------|----------|
| MLANA     | 9p24. 1    | -0.283171783 | 0.000123 | 0.00063  |
| RAPGEF4   | 2q31. 1    | -0.283087018 | 0.000123 | 0.000633 |
| DNPEP     | 2q35       | 0.283043542  | 0.000123 | 0.000635 |
| CTAGE6    | 7q35       | 0.28303157   | 0.000124 | 0.000635 |
| LMBRD1    | 6q13       | -0.283010064 | 0.000124 | 0.000635 |
| CSNK1G1   | 15q22. 31  | -0.282987048 | 0.000124 | 0.000636 |
| ESRP1     | 8q22. 1    | 0.282934739  | 0.000124 | 0.000638 |
| RGPD1     | 2p11. 2    | -0.282930555 | 0.000124 | 0.000638 |
| GTF2A1    | 14q31. 1   | -0.282922185 | 0.000124 | 0.000638 |
| KIF2C     | 1p34. 1    | 0.282901262  | 0.000124 | 0.000639 |
| TRAF7     | 16p13. 3   | 0.282888708  | 0.000125 | 0.000639 |
| NXPH1     | 7p21. 3    | -0.282683467 | 0.000126 | 0.000646 |
| KIF18B    | 17q21. 31  | 0.28267738   | 0.000126 | 0.000646 |
| RGS3      | 9q32       | 0.282648087  | 0.000126 | 0.000647 |
| ZNF274    | 19q13. 43  | 0.282627163  | 0.000126 | 0.000648 |
| ZNF84     | 12q24. 33  | -0.282622978 | 0.000126 | 0.000648 |
| NODAL     | 10q22. 1   | 0.282589659  | 0.000127 | 0.000649 |
| PLSCR4    | 3q24       | -0.282581131 | 0.000127 | 0.000649 |
| TM2D2     | 8p11. 22   | 0.282545561  | 0.000127 | 0.00065  |
| PTPRA     | 20p13      | -0.282522545 | 0.000127 | 0.000651 |
| SDC2      | 8q22. 1    | -0.282445128 | 0.000128 | 0.000654 |
| TAMM41    | 3p25. 2    | 0.282443036  | 0.000128 | 0.000654 |
| CNGA3     | 2q11. 2    | -0.282431344 | 0.000128 | 0.000654 |
| BIRC5     | 17q25. 3   | 0.282426297  | 0.000128 | 0.000654 |
| CRB3      | 19p13. 3   | 0.28237608   | 0.000128 | 0.000656 |
| PPA1      | 10q22. 1   | 0.28234888   | 0.000128 | 0.000657 |
| BRINP2    | 1q25. 2    | -0.282291813 | 0.000129 | 0.000659 |
| TTC26     | 7q34       | -0.282271462 | 0.000129 | 0.000659 |
| SNRPG     | 2p13. 3    | 0.282256816  | 0.000129 | 0.00066  |
| TMEM209   | 7q32. 2    | -0.282235892 | 0.000129 | 0.00066  |
| KCNH6     | 17q23. 3   | -0.282219    | 0.000129 | 0.000661 |
| SYTL1     | 1p36. 11   | 0.282106166  | 0.00013  | 0.000665 |
| NAA25     | 12q24. 13  | -0.282068504 | 0.000131 | 0.000666 |
| FNDC5     | 1p35. 1    | -0.282060134 | 0.000131 | 0.000666 |
| GALNT13   | 2q23. 3-q2 | -0.282032035 | 0.000131 | 0.000667 |
| EIPR1     | 2p25. 3    | 0.281982717  | 0.000131 | 0.000669 |
| EIF3M     | 11p13      | 0.281930408  | 0.000132 | 0.000671 |
| CLIP3     | 19q13. 12  | -0.281928316 | 0.000132 | 0.000671 |
| B3GNT6    | 11q13. 5   | 0.281860632  | 0.000132 | 0.000673 |
| CUL4B     | Xq24       | -0.281842529 | 0.000132 | 0.000673 |
| EXOSC5    | 19q13. 2   | 0.281832215  | 0.000132 | 0.000674 |
| ZNF33A    | 10p11. 1   | -0.281815329 | 0.000132 | 0.000674 |
| SHPK      | 17p13. 2   | -0.281800682 | 0.000133 | 0.000675 |
| OR2L13    | 1q44       | -0.281785108 | 0.000133 | 0.000675 |
| PRRG2     | 19q13. 33  | 0.281765112  | 0.000133 | 0.000676 |
| SEMA4D    | 9q22. 2    | -0.281721173 | 0.000133 | 0.000677 |
| TOP2B     | 3p24. 2    | -0.281597724 | 0.000134 | 0.000682 |
| PLCH2     | 1p36. 32   | 0.281593539  | 0.000134 | 0.000682 |
| CASP8AP2  | 6q15       | -0.281553784 | 0.000134 | 0.000683 |
| TIAF1     | 17q11. 2   | 0.281553784  | 0.000134 | 0.000683 |
| LOC728554 | 5q35. 3    | 0.281472182  | 0.000135 | 0.000686 |
| LMNTD2    | 11p15. 5   | 0.281440797  | 0.000135 | 0.000687 |
| HIST2H2BF | 1q21. 2    | 0.281430335  | 0.000135 | 0.000687 |
| ABCA10    | 17q24. 3   | -0.281413596 | 0.000136 | 0.000688 |

|          |           |              |          |          |
|----------|-----------|--------------|----------|----------|
| NYAP2    | 2q36.3    | -0.281379919 | 0.000136 | 0.000689 |
| BAGE2    | 21p11.2   | -0.281292672 | 0.000137 | 0.000692 |
| TRIM9    | 14q22.1   | -0.281277593 | 0.000137 | 0.000693 |
| NPTXR    | 22q13.1   | -0.281269224 | 0.000137 | 0.000693 |
| ATP6V0A2 | 12q24.31  | -0.281210638 | 0.000137 | 0.000695 |
| PCBP3    | 21q22.3   | -0.281189714 | 0.000137 | 0.000696 |
| GUCY1A1  | 4q32.1    | -0.281126943 | 0.000138 | 0.000698 |
| EXD3     | 9q34.3    | 0.281045341  | 0.000138 | 0.000701 |
| ACLY     | 17q21.2   | -0.280986755 | 0.000139 | 0.000703 |
| C4BPB    | 1q32.1    | 0.28084866   | 0.00014  | 0.000709 |
| ZXDA     | Xp11.21   | -0.280838198 | 0.00014  | 0.000709 |
| FLAD1    | 1q21.3    | 0.280775427  | 0.000141 | 0.000711 |
| RGPD4    | 2q12.3    | -0.280746134 | 0.000141 | 0.000712 |
| MMRN2    | 10q23.2   | -0.28073358  | 0.000141 | 0.000713 |
| FAM3C    | 7q31.31   | 0.280727303  | 0.000141 | 0.000713 |
| SHANK3   | 22q13.33  | -0.28069801  | 0.000141 | 0.000714 |
| CADPS2   | 7q31.32   | -0.280614316 | 0.000142 | 0.000717 |
| FLVCR1   | 1q32.3    | -0.280597577 | 0.000142 | 0.000717 |
| NRP2     | 2q33.3    | 0.280522252  | 0.000143 | 0.00072  |
| FAM219A  | 9p13.3    | -0.280465759 | 0.000143 | 0.000722 |
| ABRAXAS1 | 4q21.23   | -0.280442743 | 0.000143 | 0.000723 |
| DDAH2    | 6p21.33   | 0.280417634  | 0.000144 | 0.000724 |
| KMT2A    | 11q23.3   | -0.280400896 | 0.000144 | 0.000725 |
| C4ORF46  | 4q32.1    | -0.280325571 | 0.000144 | 0.000727 |
| IN080B   | 2p13.1    | 0.280310924  | 0.000144 | 0.000728 |
| OIP5     | 15q15.1   | 0.280308832  | 0.000144 | 0.000728 |
| TTY4C    | Yq11.23   | -0.280298298 | 0.000145 | 0.000728 |
| VPS9D1   | 16q24.3   | 0.280252338  | 0.000145 | 0.00073  |
| FAM218A  | 4q32.3    | -0.280044295 | 0.000147 | 0.000738 |
| RNF5     | 6p21.32   | 0.280024271  | 0.000147 | 0.000739 |
| MACO1    | 1p36.11 1 | -0.280022179 | 0.000147 | 0.000739 |
| PPM1H    | 12q14.1-c | -0.279990794 | 0.000147 | 0.00074  |
| RUNX1T1  | 8q21.3    | -0.279965685 | 0.000147 | 0.000741 |
| CISD3    | 17q12     | 0.279957316  | 0.000147 | 0.000741 |
| NDUFB3   | 2q33.1    | 0.279928023  | 0.000148 | 0.000742 |
| SSUH2    | 3p25.3    | -0.279909192 | 0.000148 | 0.000743 |
| IFNA13   | 9p21.3    | 0.27989267   | 0.000148 | 0.000743 |
| KIRREL2  | 19q13.12  | -0.279868684 | 0.000148 | 0.000744 |
| THAP12   | 11q13.5   | -0.27986316  | 0.000148 | 0.000744 |
| OSTF1    | 9q21.13   | 0.279859122  | 0.000148 | 0.000744 |
| SLC38A5  | Xp11.23   | 0.279840144  | 0.000148 | 0.000745 |
| ARHGEF6  | Xq26.3    | -0.279833867 | 0.000148 | 0.000745 |
| NUDT1    | 7p22.3    | 0.279804574  | 0.000149 | 0.000746 |
| INAFM1   | 19q13.32  | 0.279777373  | 0.000149 | 0.000747 |
| MRPL52   | 14q11.2   | 0.27975645   | 0.000149 | 0.000747 |
| FAM86C2P | 11q13.2   | 0.279733434  | 0.000149 | 0.000748 |
| PREX2    | 8q13.2    | -0.279725064 | 0.000149 | 0.000748 |
| EGLN3    | 14q13.1   | 0.279672755  | 0.00015  | 0.00075  |
| RNH1     | 11p15.5   | 0.2796058    | 0.00015  | 0.000753 |
| MAP3K14  | 17q21.31  | -0.279572322 | 0.000151 | 0.000754 |
| ZNF697   | 1p12      | -0.279494905 | 0.000151 | 0.000757 |
| MMUT     | 6p12.3    | -0.279492813 | 0.000151 | 0.000757 |
| SLC30A9  | 4p13      | -0.27941958  | 0.000152 | 0.00076  |
| MALT1    | 18q21.32  | -0.279365179 | 0.000152 | 0.000763 |

|            |           |              |          |          |
|------------|-----------|--------------|----------|----------|
| ADH1A      | 4q23      | -0.279345052 | 0.000153 | 0.000763 |
| RAB30      | 11q14.1   | -0.279333394 | 0.000153 | 0.000763 |
| CEP85L     | 6q22.31   | -0.279329609 | 0.000153 | 0.000763 |
| A1CF       | 10q11.23  | -0.279326617 | 0.000153 | 0.000763 |
| LDHAL6B    | 15q22.2   | 0.279288636  | 0.000153 | 0.000765 |
| ZNF695     | 1q44      | 0.27926976   | 0.000153 | 0.000766 |
| DNASE1L1   | Xq28      | 0.279233361  | 0.000154 | 0.000767 |
| FAU        | 11q13.1   | 0.279231268  | 0.000154 | 0.000767 |
| ECT2       | 3q26.31   | 0.279218714  | 0.000154 | 0.000767 |
| NPY5R      | 4q32.2    | -0.279200673 | 0.000154 | 0.000768 |
| E2F6       | 2p25.1    | -0.279199883 | 0.000154 | 0.000768 |
| TCTN3      | 10q24.1   | -0.279183144 | 0.000154 | 0.000768 |
| FNDC4      | 2p23.3    | 0.279151759  | 0.000154 | 0.000769 |
| PPIL4      | 6q25.1    | -0.279103634 | 0.000155 | 0.000771 |
| TMOD1      | 9q22.33   | -0.279059695 | 0.000155 | 0.000773 |
| EXD2       | 14q24.1   | -0.278990647 | 0.000156 | 0.000776 |
| BATF2      | 11q13.1   | 0.278976001  | 0.000156 | 0.000776 |
| PEX13      | 2p15      | 0.278976001  | 0.000156 | 0.000776 |
| PDZD11     | Xq13.1    | 0.278940431  | 0.000156 | 0.000777 |
| TRAM1L1    | 4q26      | -0.278938338 | 0.000156 | 0.000777 |
| ZNF746     | 7q36.1    | -0.278932061 | 0.000156 | 0.000777 |
| TASOR      | 3p14.3    | -0.278921599 | 0.000156 | 0.000778 |
| CBLN1      | 16q12.1   | -0.278871966 | 0.000157 | 0.00078  |
| SPINK2     | 4q12      | -0.278865266 | 0.000157 | 0.00078  |
| ZNF85      | 19p12     | -0.278856736 | 0.000157 | 0.00078  |
| ALG2       | 9q22.33   | -0.278854644 | 0.000157 | 0.00078  |
| PHAX       | 5q23.2    | -0.278852552 | 0.000157 | 0.00078  |
| KIAA0825   | 5q15      | -0.278823259 | 0.000157 | 0.000781 |
| SNORA8     | 11q21     | 0.278796058  | 0.000157 | 0.000782 |
| RAD51D     | 17q12     | -0.278791873 | 0.000157 | 0.000782 |
| JCAD       | 10p11.23  | -0.278747934 | 0.000158 | 0.000784 |
| DSCAM      | 21q22.2   | -0.278705853 | 0.000158 | 0.000785 |
| ERLEC1     | 2p16.2    | -0.278703994 | 0.000158 | 0.000785 |
| PGBD3      | 10q11.23  | -0.278689348 | 0.000158 | 0.000786 |
| ZFH3       | 16q22.2-c | -0.278643316 | 0.000159 | 0.000788 |
| IFFO1      | 12p13.31  | -0.278614023 | 0.000159 | 0.000789 |
| JMJD1C-AS1 | 10q21.3   | 0.278607746  | 0.000159 | 0.000789 |
| LSAMP      | 3q13.31   | -0.278580545 | 0.000159 | 0.00079  |
| ATP6V0E2   | 7q36.1    | -0.278565899 | 0.000159 | 0.00079  |
| GNG4       | 1q42.3    | -0.278553345 | 0.00016  | 0.000791 |
| LINC00158  | 21q21.2   | -0.278520117 | 0.00016  | 0.000792 |
| GANC       | 15q15.1   | 0.278488482  | 0.00016  | 0.000793 |
| ICAM5      | 19p13.2   | 0.278462738  | 0.00016  | 0.000794 |
| HJURP      | 2q37.1    | 0.278413157  | 0.000161 | 0.000796 |
| USP4       | 3p21.31   | 0.27840688   | 0.000161 | 0.000796 |
| SLC2A11    | 22q11.23  | -0.278373402 | 0.000161 | 0.000798 |
| AQP4       | 18q11.2   | -0.278347021 | 0.000161 | 0.000799 |
| USP1       | 1p31.3    | -0.278342017 | 0.000161 | 0.000799 |
| ST18       | 8q11.23   | -0.278333647 | 0.000162 | 0.000799 |
| FEZ2       | 2p22.2    | 0.278331555  | 0.000162 | 0.000799 |
| SLC39A8    | 4q24      | -0.278295985 | 0.000162 | 0.0008   |
| CCDC9      | 19q13.32  | 0.278235306  | 0.000162 | 0.000803 |
| IFT57      | 3q13.12-c | -0.278191367 | 0.000163 | 0.000804 |
| ZNRF1      | 16q23.1   | 0.278189275  | 0.000163 | 0.000804 |

|           |           |              |          |          |
|-----------|-----------|--------------|----------|----------|
| AP2M1     | 3q27.1    | 0.27814115   | 0.000163 | 0.000806 |
| KIT       | 4q12      | -0.278124412 | 0.000163 | 0.000807 |
| RTL9      | Xq23      | -0.2781188   | 0.000164 | 0.000807 |
| NAB1      | 2q32.2    | 0.278080472  | 0.000164 | 0.000808 |
| TTC5      | 14q11.2   | -0.278049087 | 0.000164 | 0.00081  |
| PIK3R1    | 5q13.1    | -0.27800724  | 0.000165 | 0.000811 |
| PIF1      | 15q22.31  | 0.277971669  | 0.000165 | 0.000813 |
| SPIRE2    | 16q24.3   | 0.277961208  | 0.000165 | 0.000813 |
| GLUD1     | 10q23.2   | 0.277917268  | 0.000165 | 0.000815 |
| TMC5      | 16p12.3   | 0.277871236  | 0.000166 | 0.000817 |
| CDK1      | 10q21.2   | 0.277802189  | 0.000166 | 0.00082  |
| LHX6      | 9q33.2    | -0.277726864 | 0.000167 | 0.000823 |
| CDCA5     | 11q13.1   | 0.277672462  | 0.000168 | 0.000825 |
| MDM2      | 12q15     | -0.277662001 | 0.000168 | 0.000826 |
| HMBS      | 11q23.3   | 0.277653631  | 0.000168 | 0.000826 |
| LOC100126 | 11p15.1   | 0.277607599  | 0.000168 | 0.000828 |
| PGK1      | Xq21.1    | 0.277574122  | 0.000169 | 0.000829 |
| SPINK13   | 5q32      | 0.277560158  | 0.000169 | 0.00083  |
| MPZ       | 1q23.3    | -0.277559475 | 0.000169 | 0.00083  |
| PKIG      | 20q13.12  | -0.277553198 | 0.000169 | 0.00083  |
| TTC17     | 11p12-p11 | -0.277513443 | 0.000169 | 0.000831 |
| CYP4F3    | 19p13.12  | 0.277500889  | 0.000169 | 0.000832 |
| ZNF429    | 19p12     | -0.277498797 | 0.000169 | 0.000832 |
| PTGER3    | 1p31.1    | -0.27749252  | 0.000169 | 0.000832 |
| NEK10     | 3p24.1    | -0.27748406  | 0.00017  | 0.000832 |
| KCTD14    | 11q14.1   | 0.27745695   | 0.00017  | 0.000833 |
| IQCG      | 3q29      | -0.277444396 | 0.00017  | 0.000833 |
| ARMC7     | 17q25.1   | 0.277440211  | 0.00017  | 0.000833 |
| LINC00469 | 17q25.1   | -0.277357753 | 0.000171 | 0.000837 |
| SNX21     | 20q13.12  | 0.277356517  | 0.000171 | 0.000837 |
| PRMT6     | 1p13.3    | -0.277312577 | 0.000171 | 0.000839 |
| STX12     | 1p35.3    | -0.277300023 | 0.000171 | 0.000839 |
| SVEP1     | 9q31.3    | -0.277285377 | 0.000171 | 0.00084  |
| TJP2      | 9q21.11   | 0.27727073   | 0.000172 | 0.00084  |
| CCDC3     | 10p13     | -0.277262361 | 0.000172 | 0.00084  |
| INSM1     | 20p11.23  | -0.277261719 | 0.000172 | 0.00084  |
| IQSEC1    | 3p25.2-p2 | -0.277253991 | 0.000172 | 0.00084  |
| GPR37L1   | 1q32.1    | 0.27723949   | 0.000172 | 0.000841 |
| CD160     | 1q21.1    | -0.277172389 | 0.000173 | 0.000844 |
| BNC1      | 15q25.2   | -0.27716142  | 0.000173 | 0.000844 |
| FBX022-AS | 15q24.2   | 0.277111711  | 0.000173 | 0.000846 |
| ATP6V1B2  | 8p21.3    | -0.277097064 | 0.000173 | 0.000847 |
| ARHGEF37  | 5q32      | -0.277015463 | 0.000174 | 0.00085  |
| UBA1      | Xp11.3    | 0.27701337   | 0.000174 | 0.00085  |
| LRP10     | 14q11.2   | 0.276971523  | 0.000174 | 0.000852 |
| C9ORF40   | 9q21.13   | -0.276919214 | 0.000175 | 0.000854 |
| ZNF254    | 19p12     | -0.27686272  | 0.000176 | 0.000857 |
| TRIP4     | 15q22.31  | 0.276829243  | 0.000176 | 0.000858 |
| PAQR3     | 4q21.21   | -0.276789488 | 0.000176 | 0.00086  |
| ZNF45     | 19q13.31  | -0.276779026 | 0.000176 | 0.00086  |
| THAP1     | 8p11.21   | -0.276774842 | 0.000176 | 0.00086  |
| CASTOR1   | 22q12.2   | 0.276766472  | 0.000177 | 0.00086  |
| ZNF793    | 19q13.12  | -0.276735231 | 0.000177 | 0.000862 |
| CANX      | 5q35.3    | -0.276697424 | 0.000177 | 0.000863 |

|          |           |              |          |          |
|----------|-----------|--------------|----------|----------|
| HIVEP1   | 6p24. 1   | -0.27668487  | 0.000177 | 0.000864 |
| HR       | 8p21. 3   | 0.276672316  | 0.000177 | 0.000864 |
| ENPP3    | 6q23. 2   | -0.276608332 | 0.000178 | 0.000867 |
| AQP2     | 12q13. 12 | 0.276554145  | 0.000179 | 0.000869 |
| ZBTB49   | 4p16. 3   | -0.276525851 | 0.000179 | 0.000871 |
| RAD54L   | 1p34. 1   | 0.276454711  | 0.00018  | 0.000874 |
| ZNF782   | 9q22. 33  | -0.276444249 | 0.00018  | 0.000874 |
| AIP      | 11q13. 2  | 0.276429603  | 0.00018  | 0.000875 |
| PIM3     | 22q13. 33 | 0.276377294  | 0.00018  | 0.000877 |
| KRT8P41  | 11p15. 4  | 0.276362936  | 0.000181 | 0.000878 |
| ATXN2L   | 16p11. 2  | 0.276339631  | 0.000181 | 0.000879 |
| PRSS21   | 16p13. 3  | 0.276317249  | 0.000181 | 0.000879 |
| DUSP6    | 12q21. 33 | 0.276247568  | 0.000182 | 0.000883 |
| MGAT3    | 22q13. 1  | 0.276230829  | 0.000182 | 0.000883 |
| TIMM23   | 10q11. 22 | 0.276209905  | 0.000182 | 0.000884 |
| XRCC4    | 5q14. 2   | 0.276163873  | 0.000183 | 0.000886 |
| CTBP2    | 10q26. 13 | 0.27614295   | 0.000183 | 0.000887 |
| FBXL8    | 16q22. 1  | 0.276138765  | 0.000183 | 0.000887 |
| KLF12    | 13q22. 1  | -0.27613458  | 0.000183 | 0.000887 |
| PDE8B    | 5q13. 3   | -0.276130396 | 0.000183 | 0.000887 |
| CHRM4    | 11p11. 2  | -0.276031298 | 0.000184 | 0.000892 |
| PPP2R3C  | 14q13. 2  | -0.276006947 | 0.000184 | 0.000893 |
| MICALCL  | 11p15. 3  | 0.276004854  | 0.000184 | 0.000893 |
| FAT4     | 4q28. 1   | -0.275998577 | 0.000184 | 0.000893 |
| IL13RA2  | Xq23      | -0.275861925 | 0.000186 | 0.000899 |
| ASPG     | 14q32. 33 | 0.275843012  | 0.000186 | 0.0009   |
| GKN1     | 2p13. 3   | 0.275749459  | 0.000187 | 0.000905 |
| D2HGDH   | 2q37. 3   | 0.275732848  | 0.000187 | 0.000905 |
| LMTK3    | 19q13. 33 | 0.275711924  | 0.000187 | 0.000906 |
| ZEB2     | 2q22. 3   | -0.275634507 | 0.000188 | 0.00091  |
| KCNH3    | 12q13. 12 | -0.275630322 | 0.000188 | 0.00091  |
| DYNLT1   | 6q25. 3   | 0.27559266   | 0.000189 | 0.000911 |
| RRN3P3   | 16p12. 2  | 0.275580106  | 0.000189 | 0.000912 |
| RLN2     | 9p24. 1   | -0.275519529 | 0.000189 | 0.000915 |
| BCO1     | 16q23. 2  | 0.275460842  | 0.00019  | 0.000918 |
| ABCG2    | 4q22. 1   | -0.275456657 | 0.00019  | 0.000918 |
| SYT12    | 11q13. 2  | 0.275448287  | 0.00019  | 0.000918 |
| MED25    | 19q13. 33 | 0.27544201   | 0.00019  | 0.000918 |
| SNAP91   | 6q14. 2   | -0.275407631 | 0.00019  | 0.000919 |
| CARMIL2  | 16q22. 1  | -0.275393886 | 0.000191 | 0.000919 |
| CUL5     | 11q22. 3  | -0.275393886 | 0.000191 | 0.000919 |
| SNORD116 | 15q11. 2  | -0.27539352  | 0.000191 | 0.000919 |
| MTMR7    | 8p22      | -0.275391794 | 0.000191 | 0.000919 |
| CXORF49B | Xq13. 1   | 0.275343904  | 0.000191 | 0.000921 |
| SLC32A1  | 20q11. 23 | -0.275342582 | 0.000191 | 0.000921 |
| SYT10    | 12p11. 1  | -0.275284555 | 0.000192 | 0.000924 |
| DEPDC1B  | 5q12. 1   | 0.275222313  | 0.000192 | 0.000927 |
| NWD2     | 4p14      | -0.275184458 | 0.000193 | 0.000929 |
| SEPHS1   | 10p13     | -0.275161635 | 0.000193 | 0.00093  |
| ADAM23   | 2q33. 3   | -0.275107233 | 0.000194 | 0.000933 |
| CCL16    | 17q12     | -0.275094463 | 0.000194 | 0.000933 |
| P2RY14   | 3q25. 1   | -0.27508631  | 0.000194 | 0.000933 |
| PARM1    | 4q13. 3   | -0.275067479 | 0.000194 | 0.000934 |
| ZNF788P  | 19p13. 2  | -0.275052832 | 0.000194 | 0.000934 |

|          |             |               |           |           |
|----------|-------------|---------------|-----------|-----------|
| PGM5-AS1 | 9q21. 11    | -0. 275014151 | 0. 000195 | 0. 000936 |
| TCP1     | 6q25. 3     | -0. 274975415 | 0. 000195 | 0. 000938 |
| HOXB8    | 17q21. 32   | 0. 274954491  | 0. 000195 | 0. 000939 |
| SGPP2    | 2q36. 1     | 0. 274906367  | 0. 000196 | 0. 000941 |
| ARL10    | 5q35. 2     | -0. 274889628 | 0. 000196 | 0. 000942 |
| SCCPDH   | 1q44        | 0. 274879166  | 0. 000196 | 0. 000942 |
| TSPY26P  | 20q11. 21   | -0. 274799657 | 0. 000197 | 0. 000946 |
| ABCB1    | 7q21. 12    | -0. 274782918 | 0. 000197 | 0. 000947 |
| ANO3     | 11p14. 3-1  | -0. 274729954 | 0. 000198 | 0. 000949 |
| LENG9    | 19q13. 42   | 0. 274695039  | 0. 000198 | 0. 000951 |
| MAGED1   | Xp11. 22    | -0. 274653192 | 0. 000199 | 0. 000953 |
| MYO9A    | 15q23       | -0. 274632268 | 0. 000199 | 0. 000954 |
| FIBCD1   | 9q34. 12    | 0. 274630176  | 0. 000199 | 0. 000954 |
| TPI1     | 12p13. 31   | 0. 274598791  | 0. 000199 | 0. 000955 |
| RAB18    | 10p12. 1    | -0. 274594606 | 0. 000199 | 0. 000955 |
| ZNF549   | 19q13. 43   | -0. 274584144 | 0. 000199 | 0. 000956 |
| SRMS     | 20q13. 33   | 0. 274555533  | 0. 0002   | 0. 000957 |
| UBXN7    | 3q29        | -0. 274544533 | 0. 0002   | 0. 000957 |
| ZFAND5   | 9q21. 13    | -0. 274479526 | 0. 000201 | 0. 00096  |
| SV2A     | 1q21. 2     | -0. 274458603 | 0. 000201 | 0. 000961 |
| CFAP54   | 12q23. 1    | -0. 274454569 | 0. 000201 | 0. 000961 |
| CMTM4    | 16q21-q22   | -0. 27442094  | 0. 000201 | 0. 000963 |
| RPL28    | 19q13. 42   | 0. 274410479  | 0. 000201 | 0. 000963 |
| BSG      | 19p13. 3    | 0. 274301676  | 0. 000203 | 0. 000969 |
| ANKRD53  | 2p13. 3     | -0. 274266106 | 0. 000203 | 0. 000971 |
| IGLON5   | 19q13. 41   | 0. 274211705  | 0. 000204 | 0. 000973 |
| PCDHB9   | 5q31. 3     | 0. 274186596  | 0. 000204 | 0. 000974 |
| RUFY4    | 2q35        | 0. 274171047  | 0. 000204 | 0. 000975 |
| CAVIN2   | 2q32. 3     | -0. 274157303 | 0. 000204 | 0. 000976 |
| MAPKAPK3 | 3p21. 2     | 0. 274098717  | 0. 000205 | 0. 000978 |
| SHD      | 19p13. 3    | -0. 274041429 | 0. 000206 | 0. 000981 |
| MMP14    | 14q11. 2    | 0. 274040131  | 0. 000206 | 0. 000981 |
| FOXO1    | 13q14. 11   | -0. 274012931 | 0. 000206 | 0. 000982 |
| ZNF385B  | 2q31. 2-q32 | -0. 27400052  | 0. 000206 | 0. 000983 |
| YDJC     | 22q11. 21   | 0. 273992007  | 0. 000206 | 0. 000983 |
| APMAP    | 20p11. 21   | -0. 273987822 | 0. 000206 | 0. 000983 |
| FBXO17   | 19q13. 2    | -0. 273973176 | 0. 000206 | 0. 000984 |
| UBFD1    | 16p12. 2    | -0. 273925052 | 0. 000207 | 0. 000986 |
| CD34     | 1q32. 2     | -0. 273897851 | 0. 000207 | 0. 000987 |
| BIVM     | 13q33. 1    | -0. 273883205 | 0. 000207 | 0. 000988 |
| FXYD6    | 11q23. 3    | -0. 273870651 | 0. 000208 | 0. 000988 |
| SH3RF1   | 4q32. 3-q33 | 0. 273862281  | 0. 000208 | 0. 000989 |
| TSC22D4  | 7q22. 1     | 0. 273814157  | 0. 000208 | 0. 000991 |
| KLHL41   | 2q31. 1     | -0. 273730463 | 0. 000209 | 0. 000995 |
| ZNF157   | Xp11. 3     | -0. 273707144 | 0. 000209 | 0. 000996 |
| EFCAB6   | 22q13. 2-c  | -0. 273686523 | 0. 00021  | 0. 000997 |
| ZNF554   | 19p13. 3    | -0. 273663507 | 0. 00021  | 0. 000998 |
| SETD4    | 21q22. 12   | 0. 273632122  | 0. 00021  | 0. 001    |
| GOS2     | 1q32. 2     | 0. 273560982  | 0. 000211 | 0. 001004 |
| DMRTC1B  | Xq13. 1     | -0. 27351115  | 0. 000212 | 0. 001006 |
| ATG7     | 3p25. 3     | 0. 273496119  | 0. 000212 | 0. 001007 |
| ZNF593   | 1p36. 11    | 0. 273450087  | 0. 000212 | 0. 001009 |
| LYPD3    | 19q13. 31   | 0. 273412424  | 0. 000213 | 0. 001011 |
| QRSL1    | 6q21        | -0. 273406147 | 0. 000213 | 0. 001011 |

|           |           |               |           |           |
|-----------|-----------|---------------|-----------|-----------|
| ARV1      | 1q42. 2   | 0. 273387316  | 0. 000213 | 0. 001012 |
| DHX40     | 17q23. 1  | -0. 273366393 | 0. 000213 | 0. 001013 |
| MAN1A2    | 1p12      | -0. 273330823 | 0. 000214 | 0. 001015 |
| CEP19     | 3q29      | -0. 273251313 | 0. 000215 | 0. 001019 |
| KIDINS22C | 2p25. 1   | -0. 273215743 | 0. 000215 | 0. 001021 |
| BTG2      | 1q32. 1   | -0. 27315088  | 0. 000216 | 0. 001024 |
| FAM163A   | 1q25. 2   | -0. 273144603 | 0. 000216 | 0. 001024 |
| ADCYAP1R1 | 7p14. 3   | -0. 273139551 | 0. 000216 | 0. 001024 |
| MYO16     | 13q33. 3  | -0. 273119494 | 0. 000216 | 0. 001025 |
| ODF3B     | 22q13. 33 | 0. 273111125  | 0. 000216 | 0. 001025 |
| CLN6      | 15q23     | 0. 273090201  | 0. 000217 | 0. 001026 |
| PCDH19    | Xq22. 1   | -0. 273063001 | 0. 000217 | 0. 001028 |
| POLI      | 18q21. 2  | -0. 273031616 | 0. 000217 | 0. 001029 |
| CLGN      | 4q31. 1   | -0. 27297303  | 0. 000218 | 0. 001032 |
| TRIM44    | 11p13     | -0. 272968845 | 0. 000218 | 0. 001032 |
| NRM       | 6p21. 33  | 0. 272939552  | 0. 000219 | 0. 001034 |
| ZSCAN18   | 19q13. 43 | -0. 272931182 | 0. 000219 | 0. 001034 |
| ZNF644    | 1p22. 2   | -0. 27292909  | 0. 000219 | 0. 001034 |
| NOS1      | 12q24. 22 | -0. 272927649 | 0. 000219 | 0. 001034 |
| HRH2      | 5q35. 2   | -0. 272889478 | 0. 000219 | 0. 001036 |
| H2AFJ     | 12p12. 3  | 0. 272872596  | 0. 000219 | 0. 001036 |
| GRK2      | 11q13. 2  | 0. 272834934  | 0. 00022  | 0. 001038 |
| NECAP1    | 12p13. 31 | -0. 272830749 | 0. 00022  | 0. 001038 |
| SHROOM4   | Xp11. 22  | -0. 272824472 | 0. 00022  | 0. 001038 |
| TAF15     | 17q12     | 0. 27274287   | 0. 000221 | 0. 001043 |
| SLC8B1    | 12q24. 13 | 0. 272701023  | 0. 000221 | 0. 001045 |
| HMGN1     | 21q22. 2  | 0. 272692654  | 0. 000222 | 0. 001045 |
| CMC1      | 3p24. 1   | 0. 272606867  | 0. 000223 | 0. 00105  |
| ZNF776    | 19q13. 43 | -0. 27260059  | 0. 000223 | 0. 00105  |
| UBE2T     | 1q32. 1   | 0. 272585944  | 0. 000223 | 0. 001051 |
| SAT2      | 17p13. 1  | -0. 272535727 | 0. 000224 | 0. 001053 |
| SNX8      | 7p22. 3   | 0. 272529592  | 0. 000224 | 0. 001053 |
| DUSP5P1   | 1q42. 13  | 0. 2725177    | 0. 000224 | 0. 001054 |
| STRAP     | 12p12. 3  | -0. 272502249 | 0. 000224 | 0. 001054 |
| ZFYVE16   | 5q14. 1   | -0. 272500157 | 0. 000224 | 0. 001054 |
| PHGR1     | 15q15. 1  | 0. 272492253  | 0. 000224 | 0. 001055 |
| ATP8B5P   | 9p13. 3   | 0. 272487603  | 0. 000224 | 0. 001055 |
| PDLIM1    | 10q23. 33 | 0. 272435294  | 0. 000225 | 0. 001057 |
| MMP7      | 11q22. 2  | 0. 272418698  | 0. 000225 | 0. 001058 |
| INTS4     | 11q14. 1  | 0. 272410186  | 0. 000225 | 0. 001058 |
| CA5A      | 16q24. 2  | 0. 272395581  | 0. 000225 | 0. 001059 |
| PCDHB3    | 5q31. 3   | -0. 272349507 | 0. 000226 | 0. 001061 |
| AMZ2      | 17q24. 2  | -0. 272274182 | 0. 000227 | 0. 001066 |
| SH3RF3    | 2q13      | -0. 272267905 | 0. 000227 | 0. 001066 |
| ALG1L     | 3q21. 2   | 0. 272253259  | 0. 000227 | 0. 001066 |
| LINC00602 | 6q27      | -0. 2722411   | 0. 000227 | 0. 001067 |
| MRI1      | 19p13. 13 | 0. 272230243  | 0. 000227 | 0. 001067 |
| SLC25A33  | 1p36. 22  | -0. 272188396 | 0. 000228 | 0. 001069 |
| FAM89B    | 11q13. 1  | 0. 272113071  | 0. 000229 | 0. 001074 |
| NPR3      | 5p13. 3   | 0. 272087963  | 0. 000229 | 0. 001075 |
| ZNF326    | 1p22. 2   | -0. 272087963 | 0. 000229 | 0. 001075 |
| ADM2      | 22q13. 33 | 0. 272052393  | 0. 00023  | 0. 001077 |
| RSBN1L    | 7q11. 23  | -0. 272027284 | 0. 00023  | 0. 001078 |
| AHSA2P    | 2p15      | 0. 272027284  | 0. 00023  | 0. 001078 |

|           |            |               |           |           |
|-----------|------------|---------------|-----------|-----------|
| BPIFB1    | 20q11. 21  | 0. 272020894  | 0. 00023  | 0. 001078 |
| KCNA5     | 12p13. 32  | -0. 272016823 | 0. 00023  | 0. 001078 |
| SARNP     | 12q13. 2   | 0. 271997991  | 0. 00023  | 0. 001079 |
| ST13P4    | 13q14. 2   | -0. 271977068 | 0. 000231 | 0. 00108  |
| ITPKB     | 1q42. 12   | -0. 271941498 | 0. 000231 | 0. 001081 |
| IL36RN    | 2q14. 1    | 0. 271912513  | 0. 000231 | 0. 001083 |
| ARPC3     | 12q24. 11  | 0. 271903835  | 0. 000231 | 0. 001083 |
| LINC01106 | 2q13       | 0. 271889189  | 0. 000232 | 0. 001084 |
| NR1D1     | 17q21. 1   | 0. 271868265  | 0. 000232 | 0. 001085 |
| RGS7      | 1q43 1q25  | -0. 27184791  | 0. 000232 | 0. 001086 |
| APPL2     | 12q23. 3   | -0. 271822233 | 0. 000232 | 0. 001087 |
| ENO1      | 1p36. 23   | 0. 271820141  | 0. 000233 | 0. 001087 |
| CUX2      | 12q24. 11- | -0. 271815691 | 0. 000233 | 0. 001087 |
| KAT7      | 17q21. 33  | -0. 271763647 | 0. 000233 | 0. 00109  |
| ZNF276    | 16q24. 3   | 0. 271749001  | 0. 000233 | 0. 00109  |
| CARS      | 11p15. 4   | 0. 271711338  | 0. 000234 | 0. 001092 |
| LIN7A     | 12q21. 31  | -0. 271702969 | 0. 000234 | 0. 001093 |
| DCC       | 18q21. 2   | -0. 271685477 | 0. 000234 | 0. 001093 |
| DYNLRB1   | 20q11. 22  | 0. 271663214  | 0. 000235 | 0. 001095 |
| MAPK1     | 22q11. 22  | -0. 271656937 | 0. 000235 | 0. 001095 |
| GEMIN5    | 5q33. 2    | -0. 271640198 | 0. 000235 | 0. 001095 |
| IL33      | 9p24. 1    | -0. 271612998 | 0. 000235 | 0. 001097 |
| WDR89     | 14q23. 2   | -0. 271523026 | 0. 000236 | 0. 001102 |
| WDR87     | 19q13. 13  | -0. 271522995 | 0. 000236 | 0. 001102 |
| DHFR2     | 3q11. 2    | -0. 271516749 | 0. 000236 | 0. 001102 |
| UBQLN4    | 1q22       | 0. 271514657  | 0. 000236 | 0. 001102 |
| ADPRH     | 3q13. 33   | -0. 27150838  | 0. 000237 | 0. 001102 |
| RHOQ      | 2p21       | -0. 271506288 | 0. 000237 | 0. 001102 |
| BLZF1     | 1q24. 2    | 0. 27150001   | 0. 000237 | 0. 001102 |
| FAM167A   | 8p23. 1    | -0. 271481179 | 0. 000237 | 0. 001103 |
| SCYL1     | 11q13. 1   | 0. 271460256  | 0. 000237 | 0. 001104 |
| CMTM3     | 16q22. 1   | 0. 271447702  | 0. 000237 | 0. 001104 |
| RAP1GAP2  | 17p13. 3   | -0. 271447702 | 0. 000237 | 0. 001104 |
| LSM8      | 7q31. 31   | 0. 271445609  | 0. 000237 | 0. 001104 |
| HNRNPAB   | 5q35. 3    | 0. 271443517  | 0. 000237 | 0. 001104 |
| CCDC181   | 1q24. 2    | -0. 271422593 | 0. 000238 | 0. 001105 |
| TAF1      | Xq13. 1    | -0. 271397485 | 0. 000238 | 0. 001106 |
| LINC00336 | 6p21. 31   | 0. 271394087  | 0. 000238 | 0. 001106 |
| MIOX      | 22q13. 33  | 0. 271383585  | 0. 000238 | 0. 001106 |
| PCSK4     | 19p13. 3   | 0. 271257297  | 0. 00024  | 0. 001114 |
| PEX14     | 1p36. 22   | 0. 271253112  | 0. 00024  | 0. 001114 |
| ZSCAN25   | 7q22. 1    | -0. 27121545  | 0. 00024  | 0. 001116 |
| SLC35G1   | 10q23. 33  | -0. 271169418 | 0. 000241 | 0. 001118 |
| SCMH1     | 1p34. 2    | -0. 27110874  | 0. 000242 | 0. 001122 |
| ZNF140    | 12q24. 33  | -0. 271081539 | 0. 000242 | 0. 001123 |
| SYP       | Xp11. 23   | -0. 271054339 | 0. 000243 | 0. 001125 |
| P2RY12    | 3q25. 1    | -0. 271033982 | 0. 000243 | 0. 001126 |
| CHRNA2    | 1q21. 3    | -0. 270999937 | 0. 000243 | 0. 001128 |
| HOXA13    | 7p15. 2    | 0. 270992122  | 0. 000243 | 0. 001128 |
| NUS1      | 6q22. 1    | -0. 270943444 | 0. 000244 | 0. 00113  |
| TMEM108   | 3q22. 1    | -0. 270943444 | 0. 000244 | 0. 00113  |
| SLC25A23  | 19p13. 3   | 0. 270903689  | 0. 000245 | 0. 001133 |
| AOAH      | 7p14. 2    | -0. 270899504 | 0. 000245 | 0. 001133 |
| SEMA3E    | 7q21. 11   | -0. 270878581 | 0. 000245 | 0. 001134 |



|           |                      |               |           |           |
|-----------|----------------------|---------------|-----------|-----------|
| TPPP      | 5p15. 33             | -0. 270870211 | 0. 000245 | 0. 001134 |
| SELE      | 1q24. 2              | -0. 270853472 | 0. 000245 | 0. 001135 |
| ESR1      | 6q25. 1-q $\epsilon$ | -0. 270819995 | 0. 000246 | 0. 001136 |
| LRP2BP    | 4q35. 1              | -0. 270769778 | 0. 000246 | 0. 001139 |
| SEC14L1   | 17q25. 2-c           | -0. 270750947 | 0. 000247 | 0. 00114  |
| GPC6      | 13q31. 3-c           | -0. 270746762 | 0. 000247 | 0. 00114  |
| ANKRD40CI | 17q21. 33            | 0. 270734925  | 0. 000247 | 0. 001141 |
| MDGA1     | 6p21. 2              | -0. 270732116 | 0. 000247 | 0. 001141 |
| THAP4     | 2q37. 3              | 0. 270727931  | 0. 000247 | 0. 001141 |
| PPP1R10   | 6p21. 33             | -0. 270686084 | 0. 000248 | 0. 001143 |
| DKFZP586I | 7p14. 3              | -0. 270625405 | 0. 000248 | 0. 001146 |
| DEFB1     | 8p23. 1              | 0. 270623313  | 0. 000248 | 0. 001146 |
| NR3C2     | 4q31. 23             | -0. 270621221 | 0. 000248 | 0. 001146 |
| MAST4     | 5q12. 3              | -0. 270614944 | 0. 000248 | 0. 001146 |
| TRIM25    | 17q22                | -0. 270579374 | 0. 000249 | 0. 001148 |
| DEFB132   | 20p13                | -0. 270563536 | 0. 000249 | 0. 001149 |
| OSBPL8    | 12q21. 2             | -0. 270520788 | 0. 00025  | 0. 001152 |
| BDP1      | 5q13. 2              | -0. 270510326 | 0. 00025  | 0. 001152 |
| CCDC173   | 2q31. 1              | -0. 270501956 | 0. 00025  | 0. 001152 |
| BBOF1     | 14q24. 3             | -0. 270460109 | 0. 000251 | 0. 001155 |
| ANKRD36BF | 1q24. 2              | -0. 27044337  | 0. 000251 | 0. 001155 |
| BORCS7    | 10q24. 32            | -0. 270432909 | 0. 000251 | 0. 001156 |
| TCAF1     | 7q35                 | -0. 270422588 | 0. 000251 | 0. 001156 |
| NXF2B     | Xq22. 1              | -0. 270405683 | 0. 000251 | 0. 001157 |
| FGF19     | 11q13. 3             | 0. 27040526   | 0. 000251 | 0. 001157 |
| SLC16A14  | 2q36. 3              | -0. 270338753 | 0. 000252 | 0. 001161 |
| PRAG1     | 8p23. 1              | 0. 270311552  | 0. 000253 | 0. 001162 |
| POLN      | 4p16. 3              | -0. 27030109  | 0. 000253 | 0. 001163 |
| TAF10     | 11p15. 4             | 0. 270238319  | 0. 000254 | 0. 001166 |
| KCNJ5     | 11q24. 3             | -0. 270219488 | 0. 000254 | 0. 001167 |
| HIST1H3D  | 6p22. 2              | 0. 270190761  | 0. 000254 | 0. 001169 |
| IFT81     | 12q24. 11            | -0. 270190195 | 0. 000254 | 0. 001169 |
| B4GALT2   | 1p34. 1              | 0. 27015881   | 0. 000255 | 0. 00117  |
| ATG4B     | 2q37. 3              | 0. 270102316  | 0. 000256 | 0. 001174 |
| PLPPR4    | 1p21. 3-p $\epsilon$ | -0. 270073023 | 0. 000256 | 0. 001175 |
| CST9      | 20p11. 21            | 0. 270040142  | 0. 000256 | 0. 001177 |
| ABHD14B   | 3p21. 2              | 0. 270022807  | 0. 000257 | 0. 001178 |
| FAM3D     | 3p14. 2              | 0. 270012345  | 0. 000257 | 0. 001178 |
| WNK2      | 9q22. 31             | -0. 269976775 | 0. 000257 | 0. 001181 |
| CNTNAP5   | 2q14. 3              | -0. 26994071  | 0. 000258 | 0. 001183 |
| TBC1D5    | 3p24. 3              | -0. 269914004 | 0. 000258 | 0. 001184 |
| ATP5PD    | 17q25. 1             | 0. 269880526  | 0. 000259 | 0. 001186 |
| GMCL2     | 5q35. 3              | -0. 269808272 | 0. 00026  | 0. 00119  |
| CENPM     | 22q13. 2             | 0. 269767539  | 0. 00026  | 0. 001193 |
| ACTL6A    | 3q26. 33             | 0. 269742431  | 0. 000261 | 0. 001194 |
| CCHCR1    | 6p21. 33             | 0. 269729877  | 0. 000261 | 0. 001195 |
| ADRB2     | 5q32                 | -0. 269725692 | 0. 000261 | 0. 001195 |
| TMC2      | 20p13                | -0. 269677622 | 0. 000262 | 0. 001197 |
| PSMC3     | 11p11. 2             | 0. 269677568  | 0. 000262 | 0. 001197 |
| FAM117A   | 17q21. 33            | -0. 269629444 | 0. 000262 | 0. 0012   |
| OAS2      | 12q24. 13            | 0. 269606428  | 0. 000263 | 0. 001201 |
| FGD1      | Xp11. 22             | -0. 269589689 | 0. 000263 | 0. 001202 |
| PYROXD2   | 10q24. 2             | 0. 269522733  | 0. 000264 | 0. 001206 |
| MAP1S     | 19p13. 11            | 0. 269518549  | 0. 000264 | 0. 001206 |

|            |          |              |          |          |
|------------|----------|--------------|----------|----------|
| MIEN1      | 17q12    | 0.269518549  | 0.000264 | 0.001206 |
| RNF187     | 1q42.13  | 0.269516456  | 0.000264 | 0.001206 |
| CES2       | 16q22.1  | 0.269482979  | 0.000264 | 0.001208 |
| NR1H2      | 19q13.33 | 0.269439039  | 0.000265 | 0.001211 |
| GIMAP4     | 7q36.1   | -0.269428577 | 0.000265 | 0.001211 |
| STARD8     | Xq13.1   | -0.269420208 | 0.000265 | 0.001211 |
| BEND5      | 1p33     | -0.269411839 | 0.000265 | 0.001211 |
| SCAF1      | 19q13.33 | 0.269367899  | 0.000266 | 0.001214 |
| SMIM10L2A  | Xq26.3   | -0.26931559  | 0.000267 | 0.001217 |
| SLC6A8     | Xq28     | 0.269290482  | 0.000267 | 0.001219 |
| DRC3       | 17p11.2  | -0.269277928 | 0.000267 | 0.001219 |
| TCN1       | 11q12.1  | 0.269228073  | 0.000268 | 0.001222 |
| INTS10     | 8p21.3   | -0.269175402 | 0.000269 | 0.001225 |
| TBCE       | 1q42.3   | 0.26916494   | 0.000269 | 0.001225 |
| TSPOAP1    | 17q22    | -0.26916494  | 0.000269 | 0.001225 |
| EEF2KMT    | 16p13.3  | 0.26916494   | 0.000269 | 0.001225 |
| HSD17B8    | 6p21.32  | 0.269141925  | 0.000269 | 0.001227 |
| TM6SF1     | 15q25.2  | -0.269139832 | 0.000269 | 0.001227 |
| PPP1R36    | 14q23.3  | 0.269085431  | 0.00027  | 0.00123  |
| AMBRA1     | 11p11.2  | 0.269064507  | 0.000271 | 0.001231 |
| KHDC4      | 1q22     | 0.269056138  | 0.000271 | 0.001231 |
| PCDHGB6    | 5q31.3   | -0.269056138 | 0.000271 | 0.001231 |
| CDT1       | 16q24.3  | 0.269033122  | 0.000271 | 0.001232 |
| HIST3H2BE1 | 1q42.13  | 0.269013595  | 0.000271 | 0.001233 |
| CELF4      | 18q12.2  | -0.269010106 | 0.000271 | 0.001233 |
| PNRC1      | 6q15     | -0.268993367 | 0.000272 | 0.001234 |
| GK3P       | 4q32.3   | -0.268991275 | 0.000272 | 0.001234 |
| TFAM       | 10q21.1  | -0.268976628 | 0.000272 | 0.001235 |
| SLFN13     | 17q12    | 0.268955705  | 0.000272 | 0.001236 |
| LINC01091  | 14q28.1  | -0.268938966 | 0.000272 | 0.001237 |
| NT5M       | 17p11.2  | -0.268928504 | 0.000273 | 0.001237 |
| PGR        | 11q22.1  | -0.268924319 | 0.000273 | 0.001237 |
| DROSHA     | 5p13.3   | -0.268922227 | 0.000273 | 0.001237 |
| MASP2      | 1p36.22  | -0.268880521 | 0.000273 | 0.00124  |
| ING1       | 13q34    | 0.268857364  | 0.000274 | 0.001241 |
| ATP2B3     | Xq28     | -0.268849515 | 0.000274 | 0.001241 |
| FUT1       | 19q13.33 | -0.268819702 | 0.000274 | 0.001243 |
| IL2RG      | Xq13.1   | 0.268769485  | 0.000275 | 0.001246 |
| ST7L       | 1p13.2   | -0.268740192 | 0.000275 | 0.001248 |
| CLINT1     | 5q33.3   | 0.268692068  | 0.000276 | 0.001251 |
| CMAHP      | 6p22.3   | -0.268683698 | 0.000276 | 0.001251 |
| PPM1E      | 17q22    | -0.268635574 | 0.000277 | 0.001253 |
| CCNB1      | 5q13.2   | 0.268635574  | 0.000277 | 0.001253 |
| PLD2       | 17p13.2  | 0.268635574  | 0.000277 | 0.001253 |
| ZNF426     | 19p13.2  | -0.268610466 | 0.000277 | 0.001255 |
| PALB2      | 16p12.2  | 0.268574896  | 0.000278 | 0.001257 |
| EVX1       | 7p15.2   | 0.268567918  | 0.000278 | 0.001257 |
| DLGAP5     | 14q22.3  | 0.268558157  | 0.000278 | 0.001257 |
| DCAF8L1    | Xp21.3   | -0.268555147 | 0.000278 | 0.001257 |
| TPRA1      | 3q21.3   | 0.268482832  | 0.000279 | 0.001262 |
| CENPBD1    | 16q24.3  | -0.268474463 | 0.000279 | 0.001262 |
| KIF21A     | 12q12    | -0.268474463 | 0.000279 | 0.001262 |
| ACSL1      | 4q35.1   | -0.268466093 | 0.000279 | 0.001262 |
| RIMS2      | 8q22.3   | -0.268448666 | 0.00028  | 0.001263 |

|          |           |              |          |          |
|----------|-----------|--------------|----------|----------|
| ISL1     | 5q11.1    | -0.268388676 | 0.000281 | 0.001267 |
| PRDX3    | 10q26.11  | -0.268388676 | 0.000281 | 0.001267 |
| CNTN1    | 12q12     | -0.26837403  | 0.000281 | 0.001268 |
| PCDH10   | 4q28.3    | -0.268353106 | 0.000281 | 0.001269 |
| PFN1     | 17p13.2   | 0.268351014  | 0.000281 | 0.001269 |
| LCN6     | 9q34.3    | -0.268336686 | 0.000281 | 0.001269 |
| FER1L6   | 8q24.13   | 0.268326467  | 0.000282 | 0.00127  |
| GLRA2    | Xp22.2    | -0.26830912  | 0.000282 | 0.001271 |
| MGARP    | 4q31.1    | -0.268278138 | 0.000282 | 0.001273 |
| DCP1B    | 12p13.33  | -0.268256858 | 0.000283 | 0.001273 |
| SLC7A8   | 14q11.2   | -0.268256858 | 0.000283 | 0.001273 |
| LRRC37A3 | 17q24.1   | -0.268229657 | 0.000283 | 0.001275 |
| BTF3     | 5q13.2    | 0.268219195  | 0.000283 | 0.001275 |
| SYTL2    | 11q14.1   | 0.268212918  | 0.000283 | 0.001276 |
| PIMREG   | 17p13.2   | 0.268181533  | 0.000284 | 0.001277 |
| PPP1R15A | 19q13.33  | 0.268181533  | 0.000284 | 0.001277 |
| SURF4    | 9q34.2    | -0.268162702 | 0.000284 | 0.001278 |
| ARL6IP6  | 2q23.3    | 0.268131316  | 0.000285 | 0.00128  |
| RUVBL1   | 3q21.3    | 0.268120855  | 0.000285 | 0.001281 |
| TRPC1    | 3q23      | -0.268070638 | 0.000286 | 0.001284 |
| ZNF438   | 10p11.23  | 0.268066453  | 0.000286 | 0.001284 |
| PTPRJ    | 11p11.2   | -0.268060176 | 0.000286 | 0.001284 |
| GSKIP    | 14q32.2   | 0.268058084  | 0.000286 | 0.001284 |
| OIT3     | 10q22.1   | -0.268036461 | 0.000286 | 0.001285 |
| ABCA12   | 2q35      | 0.268031595  | 0.000286 | 0.001285 |
| MARCO    | 2q14.2    | 0.268026698  | 0.000286 | 0.001285 |
| PCGF5    | 10q23.32  | -0.268014144 | 0.000286 | 0.001286 |
| H2AFX    | 11q23.3   | 0.268005775  | 0.000287 | 0.001286 |
| DBNL     | 7p13      | 0.267989036  | 0.000287 | 0.001287 |
| IRAK1    | Xq28      | 0.267968112  | 0.000287 | 0.001288 |
| EPB41L4B | 9q31.3    | -0.267959743 | 0.000287 | 0.001288 |
| EBF3     | 10q26.3   | -0.267957651 | 0.000287 | 0.001288 |
| TTLL13P  | 15q26.1   | 0.267915804  | 0.000288 | 0.001291 |
| GALR1    | 18q23     | -0.267889866 | 0.000288 | 0.001292 |
| HEATR5A  | 14q12     | -0.267886511 | 0.000288 | 0.001292 |
| RCCD1    | 15q26.1   | 0.267794447  | 0.00029  | 0.001298 |
| SLC12A5  | 20q13.12  | -0.267791448 | 0.00029  | 0.001298 |
| IPO8     | 12p11.21  | -0.267775616 | 0.00029  | 0.001299 |
| COMMD5   | 8q24.3    | 0.267767246  | 0.00029  | 0.0013   |
| CDC14A   | 1p21.2    | -0.267750507 | 0.000291 | 0.0013   |
| MPND     | 19p13.3   | 0.267683552  | 0.000292 | 0.001305 |
| C2ORF69  | 2q33.1    | -0.267654259 | 0.000292 | 0.001307 |
| ZNF37BP  | 10q11.21  | -0.267578934 | 0.000293 | 0.001311 |
| IWS1     | 2q14.3    | 0.267578934  | 0.000293 | 0.001311 |
| MTHFR    | 1p36.22   | -0.267553826 | 0.000294 | 0.001313 |
| SLC20A1  | 2q14.1    | 0.267493148  | 0.000295 | 0.001317 |
| MGAT5    | 2q21.2-q2 | -0.267455485 | 0.000295 | 0.001319 |
| HMG2     | 1p36.11   | -0.2674513   | 0.000295 | 0.001319 |
| VWF      | 12p13.31  | -0.267432469 | 0.000296 | 0.00132  |
| ATP1B3   | 3q23      | 0.26738016   | 0.000296 | 0.001324 |
| ZNF699   | 19p13.2   | -0.267371791 | 0.000297 | 0.001324 |
| PDE8A    | 15q25.3   | -0.267359237 | 0.000297 | 0.001325 |
| ABCA8    | 17q24.2   | -0.26730902  | 0.000298 | 0.001328 |
| SHISAL1  | 22q13.31  | -0.267304835 | 0.000298 | 0.001328 |

|            |           |              |          |          |
|------------|-----------|--------------|----------|----------|
| ABHD2      | 15q26.1   | 0.267260896  | 0.000298 | 0.001331 |
| ARL6       | 3q11.2    | -0.267225326 | 0.000299 | 0.001333 |
| CDADC1     | 13q14.2   | -0.267214864 | 0.000299 | 0.001334 |
| ARHGAP31   | 3q13.32-c | -0.267206495 | 0.000299 | 0.001334 |
| RARA       | 17q21.2   | 0.267206495  | 0.000299 | 0.001334 |
| BCL2L11    | 2q13      | -0.267185571 | 0.0003   | 0.001335 |
| USP47      | 11p15.3   | -0.267141632 | 0.0003   | 0.001338 |
| BCS1L      | 2q35      | 0.267110246  | 0.000301 | 0.00134  |
| SNCG       | 10q23.2   | 0.267097692  | 0.000301 | 0.00134  |
| FAM135B    | 8q24.23   | -0.267095767 | 0.000301 | 0.00134  |
| FAM162A    | 3q21.1    | 0.267091415  | 0.000301 | 0.00134  |
| TECR       | 19p13.12  | 0.267074676  | 0.000301 | 0.001341 |
| NUP85      | 17q25.1   | 0.267053753  | 0.000302 | 0.001342 |
| ARAP3      | 5q31.3    | 0.267028644  | 0.000302 | 0.001344 |
| TSNAX      | 1q42.2    | -0.266997259 | 0.000303 | 0.001346 |
| PCNP       | 3q12.3    | -0.266993074 | 0.000303 | 0.001346 |
| ST6GALNAC9 | 9q34.11   | -0.266976335 | 0.000303 | 0.001347 |
| QDPR       | 4p15.32   | -0.26690938  | 0.000304 | 0.001352 |
| KDM3A      | 2p11.2    | 0.266875902  | 0.000305 | 0.001354 |
| PTGER4     | 5p13.1    | -0.266834055 | 0.000305 | 0.001356 |
| PPARGC1A   | 4p15.2    | -0.266806855 | 0.000306 | 0.001358 |
| SRRM5      | 19q13.31  | 0.266806855  | 0.000306 | 0.001358 |
| PHF20      | 20q11.22- | -0.266806855 | 0.000306 | 0.001358 |
| SRSF8      | 11q21     | -0.26675873  | 0.000307 | 0.001361 |
| TRPC4      | 13q13.3   | -0.266744084 | 0.000307 | 0.001362 |
| MAP7D1     | 1p34.3    | 0.26673153   | 0.000307 | 0.001362 |
| GCFC2      | 2p12      | -0.266729437 | 0.000307 | 0.001362 |
| SULT1A3    | 16p11.2   | 0.266729437  | 0.000307 | 0.001362 |
| ZNF136     | 19p13.2   | -0.266704329 | 0.000308 | 0.001363 |
| FAM124A    | 13q14.3   | -0.266656205 | 0.000308 | 0.001367 |
| SCYL2      | 12q23.1   | -0.266639466 | 0.000309 | 0.001367 |
| DNAH10     | 12q24.31  | -0.266631236 | 0.000309 | 0.001368 |
| PHB        | 17q21.33  | 0.26661645   | 0.000309 | 0.001369 |
| LINC00593  | 15q23     | -0.266575978 | 0.00031  | 0.001371 |
| CCKAR      | 4p15.2    | -0.266557657 | 0.00031  | 0.001372 |
| SLC26A6    | 3p21.31   | 0.266497186  | 0.000311 | 0.001377 |
| ZBTB2      | 6q25.1    | -0.266467893 | 0.000312 | 0.001378 |
| PIPOX      | 17q11.2   | -0.266453246 | 0.000312 | 0.001379 |
| MIA3       | 1q41      | -0.266446969 | 0.000312 | 0.001379 |
| ITPRIPL1   | 2q11.2    | -0.266426046 | 0.000312 | 0.001381 |
| C19ORF12   | 19q12     | -0.266336074 | 0.000314 | 0.001387 |
| UBA6       | 4q13.2    | 0.266317243  | 0.000314 | 0.001388 |
| C3ORF33    | 3q25.31   | -0.266313058 | 0.000314 | 0.001388 |
| TNNI1      | 1q32.1    | 0.266292135  | 0.000314 | 0.001389 |
| PPP1R11    | 6p22.1    | 0.266290042  | 0.000315 | 0.001389 |
| TNK1       | 17p13.1   | 0.266275396  | 0.000315 | 0.00139  |
| KIF20A     | 5q31.2    | 0.266235641  | 0.000315 | 0.001393 |
| IDUA       | 4p16.3    | 0.266204256  | 0.000316 | 0.001395 |
| TET2       | 4q24      | -0.266202163 | 0.000316 | 0.001395 |
| SLC7A4     | 22q11.21  | 0.266189609  | 0.000316 | 0.001395 |
| P2RX7      | 12q24.31  | -0.26618124  | 0.000316 | 0.001396 |
| SLC4A9     | 5q31.3    | 0.266171988  | 0.000317 | 0.001396 |
| GLIS1      | 1p32.3    | 0.266140717  | 0.000317 | 0.001398 |
| LINC00636  | 3q13.12   | -0.266140128 | 0.000317 | 0.001398 |

|           |           |               |           |           |
|-----------|-----------|---------------|-----------|-----------|
| PRKCD     | 3p21. 1   | 0. 266124746  | 0. 000317 | 0. 001398 |
| CDKL2     | 4q21. 1   | -0. 266120562 | 0. 000317 | 0. 001398 |
| CCDC69    | 5q33. 1   | -0. 266118469 | 0. 000317 | 0. 001398 |
| GNG10     | 9q31. 3   | -0. 266080807 | 0. 000318 | 0. 001401 |
| INTS2     | 17q23. 2  | -0. 266066616 | 0. 000318 | 0. 001402 |
| ZNF876P   | 4p16. 3   | -0. 26603059  | 0. 000319 | 0. 001404 |
| RIC1      | 9p24. 1   | -0. 266026406 | 0. 000319 | 0. 001404 |
| TERF2IP   | 16q23. 1  | -0. 266018036 | 0. 000319 | 0. 001405 |
| SMARCA5   | 4q31. 21  | -0. 265848555 | 0. 000322 | 0. 001417 |
| IGSF3     | 1p13. 1   | 0. 265840186  | 0. 000322 | 0. 001417 |
| VDR       | 12q13. 11 | 0. 265827632  | 0. 000322 | 0. 001418 |
| TMEM126A  | 11q14. 1  | 0. 265810893  | 0. 000323 | 0. 001419 |
| PURA      | 5q31. 3   | -0. 2657816   | 0. 000323 | 0. 001421 |
| LRBA      | 4q31. 3   | -0. 265748122 | 0. 000324 | 0. 001423 |
| MYO5C     | 15q21. 2  | 0. 26559538   | 0. 000327 | 0. 001435 |
| DUOXA2    | 15q21. 1  | 0. 265584011  | 0. 000327 | 0. 001435 |
| MARK2     | 11q13. 1  | 0. 265505409  | 0. 000328 | 0. 001441 |
| HIST2H2BE | 1q21. 2   | 0. 26548867   | 0. 000328 | 0. 001442 |
| NFATC1    | 18q23     | -0. 265463562 | 0. 000329 | 0. 001444 |
| FAM110D   | 1p36. 11  | -0. 265446823 | 0. 000329 | 0. 001445 |
| SOX11     | 2p25. 2   | 0. 265435454  | 0. 000329 | 0. 001445 |
| REEP6     | 19p13. 3  | 0. 265434269  | 0. 000329 | 0. 001445 |
| BCAN      | 1q23. 1   | 0. 265390329  | 0. 00033  | 0. 001448 |
| C7        | 5p13. 1   | -0. 26538196  | 0. 00033  | 0. 001448 |
| GRIP2     | 3p25. 1   | -0. 265365776 | 0. 000331 | 0. 001449 |
| SUMF1     | 3p26. 1   | 0. 265333835  | 0. 000331 | 0. 001452 |
| MAGED4B   | Xp11. 22  | -0. 265323374 | 0. 000331 | 0. 001452 |
| DNAJC28   | 21q22. 11 | -0. 265321281 | 0. 000331 | 0. 001452 |
| SEPTIN5   | 22q11. 21 | -0. 265315004 | 0. 000332 | 0. 001452 |
| RANBP6    | 9p24. 1   | -0. 265312912 | 0. 000332 | 0. 001452 |
| CDCA2     | 8p21. 2   | 0. 265285711  | 0. 000332 | 0. 001454 |
| SLC01B3   | 12p12. 2  | 0. 265284396  | 0. 000332 | 0. 001454 |
| ZNF473    | 19q13. 33 | -0. 265268972 | 0. 000332 | 0. 001454 |
| ILDR1     | 3q13. 33  | 0. 265243864  | 0. 000333 | 0. 001456 |
| FANCD2    | 3p25. 3   | 0. 265233402  | 0. 000333 | 0. 001456 |
| SEMA6A    | 5q23. 1   | -0. 265233402 | 0. 000333 | 0. 001456 |
| ZNF346    | 5q35. 2   | -0. 265181093 | 0. 000334 | 0. 00146  |
| E2F7      | 12q21. 2  | 0. 265158078  | 0. 000334 | 0. 001462 |
| CMTR1     | 6p21. 2   | -0. 265139246 | 0. 000335 | 0. 001463 |
| BEX5      | Xq22. 1   | -0. 26511623  | 0. 000335 | 0. 001464 |
| TAPBP     | 6p21. 32  | 0. 26511623   | 0. 000335 | 0. 001464 |
| KYNU      | 2q22. 2   | 0. 265097399  | 0. 000335 | 0. 001465 |
| TSPEAR    | 21q22. 3  | -0. 265092338 | 0. 000336 | 0. 001465 |
| ICE2      | 15q22. 2  | -0. 26508903  | 0. 000336 | 0. 001465 |
| METTL25   | 12q21. 31 | -0. 265078568 | 0. 000336 | 0. 001465 |
| GC        | 4q13. 3   | -0. 26507519  | 0. 000336 | 0. 001465 |
| VSTM5     | 11q21     | 0. 265044181  | 0. 000336 | 0. 001468 |
| LIF       | 22q12. 2  | 0. 265034629  | 0. 000337 | 0. 001468 |
| TMEM88    | 17p13. 1  | -0. 264986504 | 0. 000337 | 0. 001472 |
| RMI2      | 16p13. 13 | 0. 264980227  | 0. 000338 | 0. 001472 |
| GNAI1     | 7q21. 11  | -0. 264904902 | 0. 000339 | 0. 001477 |
| FBXL16    | 16p13. 3  | -0. 264892348 | 0. 000339 | 0. 001478 |
| BCDIN3D   | 12q13. 12 | -0. 264837947 | 0. 00034  | 0. 001482 |
| MTHFD1    | 14q23. 3  | 0. 264821208  | 0. 00034  | 0. 001483 |

|         |            |               |           |           |
|---------|------------|---------------|-----------|-----------|
| DAB1    | 1p32. 2    | -0. 264753733 | 0. 000342 | 0. 001488 |
| PYG01   | 15q21. 3   | -0. 264752853 | 0. 000342 | 0. 001488 |
| JAZF1   | 7p15. 2-p1 | -0. 264750068 | 0. 000342 | 0. 001488 |
| NLRC3   | 16p13. 3   | -0. 264714498 | 0. 000342 | 0. 00149  |
| SDHAP2  | 3q29       | 0. 26468102   | 0. 000343 | 0. 001493 |
| FOPNL   | 16p13. 11  | -0. 264630804 | 0. 000344 | 0. 001496 |
| SPTA1   | 1q23. 1    | -0. 264576726 | 0. 000345 | 0. 0015   |
| LRRN1   | 3p26. 2    | 0. 264572218  | 0. 000345 | 0. 0015   |
| EPHA5   | 4q13. 1-q1 | -0. 264553345 | 0. 000345 | 0. 001502 |
| CHRD2   | 11q13. 4   | -0. 264521292 | 0. 000346 | 0. 001504 |
| RAET1L  | 6q25. 1    | 0. 264520063  | 0. 000346 | 0. 001504 |
| WDSUB1  | 2q24. 2    | -0. 264496893 | 0. 000346 | 0. 001505 |
| ZNF292  | 6q14. 3    | -0. 2644676   | 0. 000347 | 0. 001507 |
| ATP2B2  | 3p25. 3    | -0. 264445276 | 0. 000347 | 0. 001509 |
| ZNF2    | 2q11. 1    | -0. 264385998 | 0. 000348 | 0. 001513 |
| PRODH2  | 19q13. 12  | -0. 264371365 | 0. 000349 | 0. 001514 |
| ADGRD1  | 12q24. 33  | -0. 264273011 | 0. 000351 | 0. 001522 |
| KCNH1   | 1q32. 2    | -0. 264268826 | 0. 000351 | 0. 001522 |
| GPX4    | 19p13. 3   | 0. 264247902  | 0. 000351 | 0. 001523 |
| ZNF626  | 19p12      | -0. 264199778 | 0. 000352 | 0. 001527 |
| GCLM    | 1p22. 1    | -0. 264191409 | 0. 000352 | 0. 001527 |
| HOXA10  | 7p15. 2    | 0. 264185132  | 0. 000352 | 0. 001527 |
| SCGB1D2 | 11q12. 3   | -0. 264174874 | 0. 000352 | 0. 001528 |
| CLNS1A  | 11q14. 1   | 0. 264137008  | 0. 000353 | 0. 00153  |
| DOCK11  | Xq24       | -0. 264122361 | 0. 000353 | 0. 001531 |
| ZHX1    | 8q24. 13   | -0. 264113992 | 0. 000354 | 0. 001532 |
| THSD7A  | 7p21. 3    | -0. 264093068 | 0. 000354 | 0. 001533 |
| KDM6B   | 17p13. 1   | -0. 264074237 | 0. 000354 | 0. 001534 |
| ADA2    | 22q11. 1   | -0. 264028205 | 0. 000355 | 0. 001538 |
| CAMKMT  | 2p21       | 0. 263957065  | 0. 000357 | 0. 001543 |
| RNF25   | 2q35       | 0. 263931957  | 0. 000357 | 0. 001545 |
| GPR34   | Xp11. 4    | -0. 263890109 | 0. 000358 | 0. 001548 |
| CNRIP1  | 2p14       | -0. 26384617  | 0. 000359 | 0. 001551 |
| C5ORF46 | 5q32       | 0. 263836376  | 0. 000359 | 0. 001552 |
| HNRNPL  | 19q13. 2   | 0. 263825246  | 0. 000359 | 0. 001553 |
| TMEM231 | 16q23. 1   | -0. 263783399 | 0. 00036  | 0. 001556 |
| LDOC1   | Xq27. 1    | -0. 263762476 | 0. 00036  | 0. 001557 |
| OR2B6   | 6p22. 1    | 0. 26375787   | 0. 00036  | 0. 001557 |
| CTR9    | 11p15. 4   | -0. 263749922 | 0. 000361 | 0. 001557 |
| COMMD8  | 4p12       | -0. 263735413 | 0. 000361 | 0. 001558 |
| AIF1L   | 9q34. 12-c | -0. 263657858 | 0. 000362 | 0. 001564 |
| WASHC2C | 10q11. 22  | -0. 263636934 | 0. 000363 | 0. 001566 |
| CFAP53  | 18q21. 1   | -0. 263622426 | 0. 000363 | 0. 001567 |
| GSTO1   | 10q25. 1   | 0. 263607641  | 0. 000363 | 0. 001568 |
| C2ORF76 | 2q14. 2    | -0. 263542778 | 0. 000365 | 0. 001573 |
| STPG4   | 2p21       | 0. 263539862  | 0. 000365 | 0. 001573 |
| CBX2    | 17q25. 3   | -0. 263454899 | 0. 000366 | 0. 00158  |
| ZNF592  | 15q25. 3   | -0. 263423514 | 0. 000367 | 0. 001582 |
| SEC16A  | 9q34. 3    | -0. 263390036 | 0. 000368 | 0. 001584 |
| ZC3H12B | Xq11. 2-q1 | -0. 263371205 | 0. 000368 | 0. 001586 |
| GUCY1A2 | 11q22. 3   | -0. 26333145  | 0. 000369 | 0. 001589 |
| TCEAL8  | Xq22. 1    | -0. 263300065 | 0. 000369 | 0. 001591 |
| SOX9    | 17q24. 3   | 0. 263249848  | 0. 00037  | 0. 001595 |
| ADGRG2  | Xp22. 13   | -0. 263242663 | 0. 00037  | 0. 001595 |

|           |           |              |          |          |
|-----------|-----------|--------------|----------|----------|
| CAMK1D    | 10p13     | -0.263239387 | 0.000371 | 0.001595 |
| CNPPD1    | 2q35      | 0.263226832  | 0.000371 | 0.001596 |
| CETP      | 16q13     | -0.263168246 | 0.000372 | 0.0016   |
| ZNF107    | 7q11.21   | -0.263143138 | 0.000372 | 0.001602 |
| TNFRSF19  | 13q12.12  | -0.263088737 | 0.000374 | 0.001607 |
| SART3     | 12q23.3   | -0.263040613 | 0.000374 | 0.00161  |
| TRPC6     | 11q22.1   | -0.263032243 | 0.000375 | 0.001611 |
| SPATS2    | 12q13.12  | -0.262942272 | 0.000376 | 0.001618 |
| PAEP      | 9q34.3    | 0.262888494  | 0.000378 | 0.001622 |
| PLXNA4    | 7q32.3    | -0.262820915 | 0.000379 | 0.001628 |
| MAP3K7    | 6q15      | -0.262820915 | 0.000379 | 0.001628 |
| GJB6      | 13q12.11  | 0.262794341  | 0.000379 | 0.00163  |
| GDF10     | 10q11.22  | -0.262755334 | 0.00038  | 0.001633 |
| ZSWIM5    | 1p34.1    | -0.262741406 | 0.000381 | 0.001633 |
| DNAH9     | 17p12     | -0.262703881 | 0.000381 | 0.001636 |
| MGAT4C    | 12q21.31- | -0.262686045 | 0.000382 | 0.001638 |
| KRT6B     | 12q13.13  | 0.262661474  | 0.000382 | 0.001639 |
| CYSLTR1   | Xq21.1    | -0.262634695 | 0.000383 | 0.001641 |
| VAPB      | 20q13.32  | -0.262607495 | 0.000383 | 0.001643 |
| AQP6      | 12q13.12  | 0.262604494  | 0.000383 | 0.001643 |
| GAL3ST1   | 22q12.2   | 0.262580294  | 0.000384 | 0.001645 |
| CAP1      | 1p34.2    | 0.262557278  | 0.000384 | 0.001647 |
| CUL4A     | 13q34     | 0.262540539  | 0.000385 | 0.001648 |
| XCR1      | 3p21.31   | -0.262503966 | 0.000385 | 0.001651 |
| TSR3      | 16p13.3   | 0.262471492  | 0.000386 | 0.001653 |
| USP12     | 13q12.13  | -0.262396167 | 0.000388 | 0.001659 |
| AAMDC     | 11q14.1   | 0.262379428  | 0.000388 | 0.001661 |
| FYB2      | 1p32.2    | -0.262354995 | 0.000388 | 0.001662 |
| RYBP      | 3p13      | -0.262314565 | 0.000389 | 0.001666 |
| SLC30A5   | 5q13.1-q1 | -0.262276902 | 0.00039  | 0.001668 |
| MYH6      | 14q11.2   | -0.262274831 | 0.00039  | 0.001668 |
| TMEM87A   | 15q15.1   | 0.262268533  | 0.00039  | 0.001669 |
| TLL1      | 4q32.3    | -0.262224594 | 0.000391 | 0.001672 |
| KCNK12    | 2p16.3    | -0.26222106  | 0.000391 | 0.001672 |
| COL6A4P1  | 3p25.1    | 0.262191193  | 0.000392 | 0.001674 |
| RPTN      | 1q21.3    | 0.262172549  | 0.000392 | 0.001676 |
| TRMT9B    | 8p22      | -0.262149269 | 0.000393 | 0.001677 |
| USP44     | 12q22     | -0.262124709 | 0.000393 | 0.001679 |
| PAK5      | 20p12.2   | -0.262123876 | 0.000393 | 0.001679 |
| FBXW7     | 4q31.3    | -0.262027912 | 0.000395 | 0.001687 |
| KIAA1841  | 2p15      | 0.262021635  | 0.000395 | 0.001687 |
| RTL10     | 22q11.21  | -0.261998619 | 0.000396 | 0.001689 |
| GPN1      | 2p23.3    | 0.261975603  | 0.000396 | 0.001691 |
| TMEM132B  | 12q24.31- | -0.261965141 | 0.000397 | 0.001691 |
| DDX3X     | Xp11.4    | -0.261940033 | 0.000397 | 0.001693 |
| COL15A1   | 9q22.33   | -0.261896094 | 0.000398 | 0.001697 |
| SAE1      | 19q13.32  | 0.261895184  | 0.000398 | 0.001697 |
| HPN       | 19q13.11  | -0.261883539 | 0.000398 | 0.001697 |
| FLT1      | 13q12.3   | -0.261854246 | 0.000399 | 0.0017   |
| RETN      | 19p13.2   | 0.26180696   | 0.0004   | 0.001703 |
| S100Z     | 5q13.3    | -0.261802774 | 0.0004   | 0.001703 |
| GBP2      | 1p22.2    | 0.261799845  | 0.0004   | 0.001703 |
| SERPINB4  | 18q21.33  | 0.261798345  | 0.0004   | 0.001703 |
| LOC441666 | 10q11.21  | -0.261791613 | 0.0004   | 0.001703 |

|           |            |               |           |           |
|-----------|------------|---------------|-----------|-----------|
| NAP1L4    | 11p15. 4   | 0. 261785199  | 0. 0004   | 0. 001704 |
| WNT8B     | 10q24. 31  | -0. 261755091 | 0. 000401 | 0. 001706 |
| DBIL5P    | 17p13. 3   | -0. 261726613 | 0. 000402 | 0. 001708 |
| PROK2     | 3p13       | -0. 261651382 | 0. 000403 | 0. 001715 |
| RPN1      | 3q21. 3    | 0. 261649195  | 0. 000403 | 0. 001715 |
| C22ORF31  | 22q12. 1   | -0. 261641338 | 0. 000403 | 0. 001715 |
| COL14A1   | 8q24. 12   | -0. 261640826 | 0. 000403 | 0. 001715 |
| ADCY2     | 5p15. 31   | -0. 26154667  | 0. 000405 | 0. 001723 |
| SPRY3     | Xq28 and   | -0. 261515285 | 0. 000406 | 0. 001725 |
| LRRFIP2   | 3p22. 2    | 0. 261479715  | 0. 000407 | 0. 001728 |
| SEC24D    | 4q26       | -0. 261469253 | 0. 000407 | 0. 001729 |
| SCN1B     | 19q13. 11  | -0. 261425313 | 0. 000408 | 0. 001732 |
| MSI2      | 17q22      | -0. 261421129 | 0. 000408 | 0. 001732 |
| PLPP4     | 10q26. 12  | 0. 261379281  | 0. 000409 | 0. 001736 |
| LRFN1     | 19q13. 2   | -0. 261345804 | 0. 00041  | 0. 001739 |
| CTNNB1    | 20q11. 23  | 0. 26132488   | 0. 00041  | 0. 00174  |
| ZKSCAN3   | 6p22. 1    | -0. 26132488  | 0. 00041  | 0. 00174  |
| DCST1     | 1q21. 3    | 0. 261316843  | 0. 00041  | 0. 00174  |
| RNF227    | 17p13. 1   | -0. 261314418 | 0. 00041  | 0. 00174  |
| PRAC2     | 17q21. 32  | 0. 261237902  | 0. 000412 | 0. 001747 |
| LOXHD1    | 18q21. 1   | -0. 261202806 | 0. 000413 | 0. 00175  |
| MROH7     | 1p32. 3    | 0. 261188877  | 0. 000413 | 0. 001751 |
| CHST9     | 18q11. 2   | -0. 261168593 | 0. 000414 | 0. 001752 |
| RBP7      | 1p36. 22   | -0. 261159584 | 0. 000414 | 0. 001753 |
| RAB6B     | 3q22. 1    | -0. 261142845 | 0. 000414 | 0. 001754 |
| NXF2      | Xq22. 1    | -0. 261102645 | 0. 000415 | 0. 001757 |
| TP63      | 3q28       | 0. 261088444  | 0. 000415 | 0. 001758 |
| HDAC1     | 1p35. 2-p5 | 0. 261073797  | 0. 000416 | 0. 001759 |
| SNORA31   | 13q14. 13  | 0. 261071498  | 0. 000416 | 0. 001759 |
| RTP2      | 3q27. 3    | 0. 261060469  | 0. 000416 | 0. 001759 |
| SEPTIN7P2 | 7p12. 3    | -0. 261057059 | 0. 000416 | 0. 001759 |
| SON       | 21q22. 11  | -0. 261054966 | 0. 000416 | 0. 001759 |
| KCNJ6     | 21q22. 13  | -0. 261031498 | 0. 000417 | 0. 001761 |
| RAET1E    | 6q25. 1    | 0. 261014848  | 0. 000417 | 0. 001762 |
| PAQR6     | 1q22       | 0. 260985918  | 0. 000418 | 0. 001765 |
| PECR      | 2q35       | 0. 260946164  | 0. 000419 | 0. 001768 |
| GAS7      | 17p13. 1   | -0. 260941979 | 0. 000419 | 0. 001768 |
| GFM2      | 5q13. 3    | -0. 260912686 | 0. 000419 | 0. 00177  |
| C3ORF70   | 3q27. 2    | -0. 260885485 | 0. 00042  | 0. 001773 |
| EME1      | 17q21. 33  | 0. 260852008  | 0. 000421 | 0. 001775 |
| GALNT6    | 12q13. 13  | 0. 26077459   | 0. 000422 | 0. 001782 |
| GIN1      | 5q21. 1    | -0. 260768313 | 0. 000423 | 0. 001782 |
| RALBP1    | 18p11. 22  | 0. 260749482  | 0. 000423 | 0. 001784 |
| ANGPTL4   | 19p13. 2   | 0. 260726466  | 0. 000423 | 0. 001786 |
| IL15RA    | 10p15. 1   | 0. 260695081  | 0. 000424 | 0. 001788 |
| ATG4A     | Xq22. 3    | -0. 260687894 | 0. 000424 | 0. 001788 |
| CC2D1A    | 19p13. 12  | 0. 260686711  | 0. 000424 | 0. 001788 |
| FAM136A   | 2p13. 3    | 0. 26067625   | 0. 000425 | 0. 001789 |
| COL4A3BP  | 5q13. 3    | -0. 26066788  | 0. 000425 | 0. 001789 |
| PSMD5     | 9q33. 2    | -0. 260663696 | 0. 000425 | 0. 001789 |
| SPTAN1    | 9q34. 11   | 0. 260607202  | 0. 000426 | 0. 001794 |
| ZNF550    | 19q13. 43  | -0. 260603017 | 0. 000426 | 0. 001794 |
| LOC100131 | 20q13. 12  | 0. 260589052  | 0. 000427 | 0. 001795 |
| CYP7B1    | 8q12. 3    | -0. 260567447 | 0. 000427 | 0. 001797 |



|           |           |               |           |           |
|-----------|-----------|---------------|-----------|-----------|
| CNTLN     | 9p22. 2   | -0. 260552801 | 0. 000427 | 0. 001798 |
| FAM160B2  | 8p21. 3   | 0. 260517231  | 0. 000428 | 0. 001801 |
| PRKG2     | 4q21. 21  | -0. 260515138 | 0. 000428 | 0. 001801 |
| FAM173A   | 16p13. 3  | 0. 26048166   | 0. 000429 | 0. 001804 |
| LOC646214 | 15q11. 2  | -0. 260473291 | 0. 000429 | 0. 001804 |
| SYN3      | 22q12. 3  | -0. 260449535 | 0. 00043  | 0. 001806 |
| PACRG     | 6q26      | -0. 26041052  | 0. 000431 | 0. 001809 |
| ADRA1A    | 8p21. 2   | -0. 260365059 | 0. 000432 | 0. 001813 |
| DLGAP1    | 18p11. 31 | -0. 260350793 | 0. 000432 | 0. 001814 |
| NOXO1     | 16p13. 3  | 0. 260218024  | 0. 000435 | 0. 001827 |
| MEDAG     | 13q12. 3  | -0. 26012596  | 0. 000437 | 0. 001835 |
| SLC66A1L  | 3q25. 32  | 0. 260099388  | 0. 000438 | 0. 001837 |
| GRIK5     | 19q13. 2  | -0. 260050635 | 0. 000439 | 0. 001842 |
| NFKB2     | 10q24. 32 | 0. 260006696  | 0. 00044  | 0. 001845 |
| MAB21L4   | 2q37. 3   | 0. 259989957  | 0. 00044  | 0. 001847 |
| DPP4      | 2q24. 2   | -0. 25997531  | 0. 000441 | 0. 001848 |
| RPS3A     | 4q31. 3   | -0. 259964848 | 0. 000441 | 0. 001848 |
| ANKRD12   | 18p11. 22 | -0. 259870692 | 0. 000443 | 0. 001857 |
| DENND4C   | 9p22. 1   | -0. 259856046 | 0. 000443 | 0. 001858 |
| PHF3      | 6q12      | -0. 259841399 | 0. 000444 | 0. 001859 |
| DHCR24    | 1p32. 3   | 0. 259795368  | 0. 000445 | 0. 001863 |
| SNX15     | 11q13. 1  | 0. 259778629  | 0. 000445 | 0. 001865 |
| RC3H2     | 9q33. 2   | -0. 259774444 | 0. 000445 | 0. 001865 |
| TLCD4     | 1p21. 3   | -0. 259738874 | 0. 000446 | 0. 001868 |
| SLAIN1    | 13q22. 3  | -0. 259722135 | 0. 000447 | 0. 001869 |
| C12ORF66  | 12q14. 2  | -0. 25971795  | 0. 000447 | 0. 001869 |
| P2RY13    | 3q25. 1   | -0. 259650995 | 0. 000448 | 0. 001874 |
| GNPTAB    | 12q23. 2  | -0. 259650995 | 0. 000448 | 0. 001874 |
| ANKEF1    | 20p12. 2  | -0. 259648903 | 0. 000448 | 0. 001874 |
| LAMTOR5   | 1p13. 3   | 0. 25964681   | 0. 000448 | 0. 001874 |
| ADAMTS1   | 21q21. 3  | -0. 259640533 | 0. 000448 | 0. 001875 |
| PCDHA5    | 5q31. 3   | -0. 259568948 | 0. 00045  | 0. 001881 |
| LINC0155C | 14q32. 2  | -0. 259527857 | 0. 000451 | 0. 001885 |
| AFF3      | 2q11. 2   | -0. 259519176 | 0. 000451 | 0. 001886 |
| PRB2      | 12p13. 2  | 0. 259443408  | 0. 000453 | 0. 001893 |
| LLGL2     | 17q25. 1  | 0. 25938945   | 0. 000454 | 0. 001898 |
| CYB5D2    | 17p13. 2  | -0. 259383173 | 0. 000455 | 0. 001898 |
| LOXL1     | 15q24. 1  | 0. 259374804  | 0. 000455 | 0. 001898 |
| SLC9A9    | 3q24      | -0. 259324587 | 0. 000456 | 0. 001903 |
| UNC80     | 2q34      | -0. 259290335 | 0. 000457 | 0. 001906 |
| MRPL28    | 16p13. 3  | 0. 25928274   | 0. 000457 | 0. 001906 |
| CNN3      | 1p21. 3   | -0. 259259724 | 0. 000458 | 0. 001908 |
| DESI1     | 22q13. 2  | 0. 259238801  | 0. 000458 | 0. 00191  |
| DBNDD1    | 16q24. 3  | 0. 259201138  | 0. 000459 | 0. 001913 |
| PHF21A    | 11p11. 2  | -0. 259186492 | 0. 000459 | 0. 001914 |
| WBP11     | 12p12. 3  | -0. 259167661 | 0. 00046  | 0. 001916 |
| SV2B      | 15q26. 1  | -0. 259138368 | 0. 00046  | 0. 001918 |
| CNNM3     | 2q11. 2   | -0. 25909652  | 0. 000461 | 0. 001922 |
| PRKCH     | 14q23. 1  | -0. 259088151 | 0. 000462 | 0. 001923 |
| SLC16A6   | 17q24. 2  | -0. 259075597 | 0. 000462 | 0. 001924 |
| PODNL1    | 19p13. 12 | 0. 259056766  | 0. 000462 | 0. 001925 |
| APEH      | 3p21. 31  | 0. 259019103  | 0. 000463 | 0. 001928 |
| GNB2      | 7q22. 1   | 0. 258968887  | 0. 000465 | 0. 001933 |
| FABP6     | 5q33. 3   | 0. 2589605    | 0. 000465 | 0. 001934 |

|           |           |              |          |          |
|-----------|-----------|--------------|----------|----------|
| NANOS1    | 10q26.11  | -0.25891867  | 0.000466 | 0.001937 |
| TNFRSF1A  | 12p13.31  | 0.258916578  | 0.000466 | 0.001937 |
| SRPRA     | 11q24.2   | -0.258910301 | 0.000466 | 0.001938 |
| CDON      | 11q24.2   | -0.258895654 | 0.000466 | 0.001939 |
| PRR14L    | 22q12.2   | -0.258885192 | 0.000467 | 0.001939 |
| EIF4E3    | 3p13      | -0.258885192 | 0.000467 | 0.001939 |
| NFXL1     | 4p12      | -0.2588831   | 0.000467 | 0.001939 |
| SARM1     | 17q11.2   | -0.258870546 | 0.000467 | 0.001939 |
| VPS13D    | 1p36.22-f | -0.258866361 | 0.000467 | 0.001939 |
| ZNF222    | 19q13.31  | -0.258866361 | 0.000467 | 0.001939 |
| FNIP2     | 4q32.1    | -0.258816145 | 0.000468 | 0.001944 |
| PPT1      | 1p34.2    | -0.258801498 | 0.000469 | 0.001945 |
| SF3A2     | 19p13.3   | 0.258774297  | 0.000469 | 0.001947 |
| PTTG1     | 5q33.3    | 0.258738727  | 0.00047  | 0.001951 |
| MRPL21    | 11q13.3   | 0.258717804  | 0.000471 | 0.001952 |
| LAT2      | 7q11.23   | -0.258684326 | 0.000472 | 0.001955 |
| DLX4      | 17q21.33  | 0.258667894  | 0.000472 | 0.001956 |
| H3F3B     | 17q25.1   | 0.258667587  | 0.000472 | 0.001956 |
| TEDC1     | 14q32.33  | 0.258663403  | 0.000472 | 0.001956 |
| THOC3     | 5q35.2    | 0.258655033  | 0.000472 | 0.001957 |
| RTL8A     | Xq26.3    | 0.258652941  | 0.000472 | 0.001957 |
| LRRC8D    | 1p22.2    | -0.258640387 | 0.000473 | 0.001957 |
| ERICH3    | 1p31.1    | -0.258598521 | 0.000474 | 0.001961 |
| GPC3      | Xq26.2    | -0.258537861 | 0.000475 | 0.001967 |
| TUBAL3    | 10p15.1   | 0.258485174  | 0.000476 | 0.001972 |
| HABP4     | 9q22.32   | -0.258445798 | 0.000477 | 0.001976 |
| PARN      | 16p13.12  | 0.258429059  | 0.000478 | 0.001977 |
| INA       | 10q24.33  | -0.258416505 | 0.000478 | 0.001978 |
| FGFR10P2  | 12p11.23  | -0.25840395  | 0.000479 | 0.001979 |
| SF3A1     | 22q12.2   | -0.258397673 | 0.000479 | 0.001979 |
| JAM2      | 21q21.3   | -0.25836838  | 0.000479 | 0.001982 |
| BHLHA15   | 7q21.3    | -0.258361362 | 0.00048  | 0.001982 |
| MAPT      | 17q21.31  | -0.258360011 | 0.00048  | 0.001982 |
| LRRC31    | 3q26.2    | 0.258344262  | 0.00048  | 0.001983 |
| SNX2      | 5q23.2    | -0.258328626 | 0.00048  | 0.001984 |
| RGS20     | 8q11.23   | 0.258298128  | 0.000481 | 0.001987 |
| RAB27B    | 18q21.2   | 0.258253301  | 0.000482 | 0.001991 |
| CRBN      | 3p26.2    | -0.258219958 | 0.000483 | 0.001994 |
| MESTIT1   | 7q32.2    | -0.258194846 | 0.000484 | 0.001997 |
| KIRREL1   | 1q23.1    | -0.258175883 | 0.000484 | 0.001998 |
| CBX3      | 7p15.2    | 0.25815496   | 0.000485 | 0.002    |
| KIAA1549  | 7q34      | -0.258081862 | 0.000487 | 0.002007 |
| EIF5      | 14q32.32  | -0.257993848 | 0.000489 | 0.002016 |
| LINC00957 | 7p13      | -0.257987571 | 0.000489 | 0.002016 |
| RRAGA     | 9p22.1    | -0.257983387 | 0.000489 | 0.002016 |
| SELENON   | 1p36.11   | -0.25793317  | 0.00049  | 0.002021 |
| GVINP1    | 11p15.4   | -0.257895508 | 0.000491 | 0.002025 |
| FLJ37453  | 1p36.21   | -0.257891323 | 0.000492 | 0.002025 |
| SAP30BP   | 17q25.1   | 0.257876677  | 0.000492 | 0.002026 |
| FUBP3     | 9q34.11-c | -0.257841106 | 0.000493 | 0.002029 |
| ZNF92     | 7q11.21   | -0.257839014 | 0.000493 | 0.002029 |
| PPP1R9A   | 7q21.3    | -0.257830645 | 0.000493 | 0.00203  |
| WDPCP     | 2p15      | -0.257801352 | 0.000494 | 0.002032 |
| NBAS      | 2p24.3    | -0.257784613 | 0.000494 | 0.002034 |

|           |           |               |           |           |
|-----------|-----------|---------------|-----------|-----------|
| ANKRD36BF | 2p11. 2   | -0. 257774286 | 0. 000495 | 0. 002034 |
| PRSS33    | 16p13. 3  | 0. 257764368  | 0. 000495 | 0. 002035 |
| SLC5A2    | 16p11. 2  | 0. 257760182  | 0. 000495 | 0. 002035 |
| ASCL1     | 12q23. 2  | -0. 25771241  | 0. 000496 | 0. 00204  |
| RTN2      | 19q13. 32 | 0. 25761304   | 0. 000499 | 0. 00205  |
| UCP2      | 11q13. 4  | -0. 25760467  | 0. 000499 | 0. 00205  |
| TSPAN11   | 12p11. 21 | -0. 257585839 | 0. 000499 | 0. 002052 |
| VEZT      | 12q22     | 0. 257579562  | 0. 0005   | 0. 002052 |
| EQTN      | 9p21. 2   | 0. 257579299  | 0. 0005   | 0. 002052 |
| PTPRN2    | 7q36. 3   | -0. 257548177 | 0. 0005   | 0. 002055 |
| PRR14     | 16p11. 2  | 0. 25753353   | 0. 000501 | 0. 002056 |
| ZIC2      | 13q32. 3  | 0. 257478509  | 0. 000502 | 0. 002061 |
| THEM6     | 8q24. 3   | 0. 257422635  | 0. 000504 | 0. 002067 |
| GATA4     | 8p23. 1   | 0. 257416493  | 0. 000504 | 0. 002067 |
| ZNF605    | 12q24. 33 | -0. 257399619 | 0. 000504 | 0. 002069 |
| POLE4     | 2p12      | 0. 257376603  | 0. 000505 | 0. 002071 |
| LUZP2     | 11p14. 3  | 0. 257310186  | 0. 000507 | 0. 002077 |
| CNTN5     | 11q22. 1  | -0. 257253612 | 0. 000508 | 0. 002083 |
| MYT1      | 20q13. 33 | -0. 257252564 | 0. 000508 | 0. 002083 |
| LILRA1    | 19q13. 42 | -0. 257178368 | 0. 00051  | 0. 00209  |
| SLC9B1    | 4q24      | -0. 257177307 | 0. 00051  | 0. 00209  |
| TKTL2     | 4q32. 2   | 0. 257116155  | 0. 000512 | 0. 002096 |
| SYT15     | 10q11. 22 | -0. 257112966 | 0. 000512 | 0. 002096 |
| NKX3-2    | 4p15. 33  | 0. 257073212  | 0. 000513 | 0. 0021   |
| PALMD     | 1p21. 2   | -0. 257064842 | 0. 000513 | 0. 002101 |
| ENTPD2    | 9q34. 3   | 0. 257050196  | 0. 000514 | 0. 002102 |
| TRABD2A   | 2p11. 2   | 0. 257025087  | 0. 000514 | 0. 002104 |
| LTK       | 15q15. 1  | 0. 256964409  | 0. 000516 | 0. 00211  |
| MPP7      | 10p12. 1  | -0. 256933024 | 0. 000517 | 0. 002113 |
| NT5E      | 6q14. 3   | 0. 256874438  | 0. 000518 | 0. 002119 |
| IGSF10    | 3q25. 1   | -0. 256859791 | 0. 000519 | 0. 002121 |
| FAM241A   | 4q25      | -0. 256830498 | 0. 00052  | 0. 002123 |
| TIGD1     | 2q37. 1   | 0. 256801205  | 0. 00052  | 0. 002126 |
| GPR132    | 14q32. 33 | 0. 256753081  | 0. 000522 | 0. 002131 |
| STYXL1    | 7q11. 23  | 0. 256748896  | 0. 000522 | 0. 002131 |
| BOC       | 3q13. 2   | -0. 256723788 | 0. 000522 | 0. 002134 |
| YIPF1     | 1p32. 3   | 0. 256631724  | 0. 000525 | 0. 002143 |
| SLC5A4    | 22q12. 3  | -0. 2565756   | 0. 000526 | 0. 002149 |
| HECTD3    | 1p34. 1   | 0. 25654803   | 0. 000527 | 0. 002152 |
| CTNND2    | 5p15. 2   | -0. 256470613 | 0. 000529 | 0. 00216  |
| DBI       | 2q14. 2   | 0. 256453874  | 0. 00053  | 0. 002161 |
| ODAPH     | 4q21. 1   | 0. 256432355  | 0. 00053  | 0. 002163 |
| NCAPG     | 4p15. 31  | 0. 256399473  | 0. 000531 | 0. 002167 |
| ADH1B     | 4q23      | -0. 256397514 | 0. 000531 | 0. 002167 |
| CCDC158   | 4q21. 1   | -0. 256365083 | 0. 000532 | 0. 00217  |
| KAT6A     | 8p11. 21  | -0. 256330425 | 0. 000533 | 0. 002173 |
| MEF2C     | 5q14. 3   | -0. 25632624  | 0. 000533 | 0. 002173 |
| EEPD1     | 7p14. 2   | 0. 256319963  | 0. 000534 | 0. 002173 |
| GTPBP2    | 6p21. 1   | 0. 25629904   | 0. 000534 | 0. 002175 |
| TMEM107   | 17p13. 1  | -0. 256280208 | 0. 000535 | 0. 002177 |
| CKMT1B    | 15q15. 3  | 0. 256271839  | 0. 000535 | 0. 002178 |
| CTNNA2    | 2p12      | -0. 256229374 | 0. 000536 | 0. 002182 |
| SLC11A1   | 2q35      | 0. 256215345  | 0. 000536 | 0. 002183 |
| DNMBP     | 10q24. 2  | 0. 25618396   | 0. 000537 | 0. 002186 |

|           |          |              |          |          |
|-----------|----------|--------------|----------|----------|
| RPRML     | 17q21.32 | -0.256179462 | 0.000537 | 0.002186 |
| VEZF1     | 17q22    | -0.256158852 | 0.000538 | 0.002188 |
| TRAF2     | 9q34.3   | 0.256156759  | 0.000538 | 0.002188 |
| SNIP1     | 1p34.3   | -0.256106543 | 0.000539 | 0.002193 |
| MTX2      | 2q31.1   | 0.25610445   | 0.00054  | 0.002193 |
| RNF14     | 5q31.3   | -0.256100266 | 0.00054  | 0.002193 |
| RNF157    | 17q25.1  | -0.256093989 | 0.00054  | 0.002193 |
| SMPD1     | 11p15.4  | -0.256066788 | 0.000541 | 0.002196 |
| AGBL2     | 11p11.2  | 0.256064696  | 0.000541 | 0.002196 |
| EMSY      | 11q13.5  | -0.256018664 | 0.000542 | 0.002201 |
| TTC30A    | 2q31.2   | -0.256014479 | 0.000542 | 0.002201 |
| TATDN2    | 3p25.3   | -0.255945431 | 0.000544 | 0.002208 |
| LRRC10B   | 11q12.2  | -0.255886845 | 0.000546 | 0.002214 |
| ODC1      | 2p25.1   | -0.255840814 | 0.000547 | 0.002219 |
| LHX1      | 17q12    | 0.255839234  | 0.000547 | 0.002219 |
| SESN2     | 1p35.3   | -0.255796874 | 0.000548 | 0.002223 |
| PRNP      | 20p13    | -0.255790597 | 0.000548 | 0.002224 |
| ZNF543    | 19q13.43 | -0.255756207 | 0.000549 | 0.002227 |
| MAPK9     | 5q35.3   | -0.255742473 | 0.00055  | 0.002228 |
| HK1       | 10q22.1  | 0.255688071  | 0.000551 | 0.002234 |
| PLEKHB1   | 11q13.4  | -0.25566924  | 0.000552 | 0.002236 |
| MREG      | 2q35     | 0.255625301  | 0.000553 | 0.00224  |
| DPP10     | 2q14.1   | -0.255622945 | 0.000553 | 0.00224  |
| TENT4A    | 5p15.31  | -0.25560647  | 0.000554 | 0.002242 |
| MYL10     | 7q22.1   | 0.255524949  | 0.000556 | 0.002251 |
| OMP       | 11q13.5  | 0.255519906  | 0.000556 | 0.002251 |
| MX2       | 21q22.3  | 0.255512314  | 0.000556 | 0.002251 |
| STAG1     | 3q22.3   | -0.255508129 | 0.000556 | 0.002251 |
| NEK2      | 1q32.3   | 0.255441173  | 0.000558 | 0.002259 |
| GIMAP1    | 7q36.1   | -0.25531354  | 0.000562 | 0.002273 |
| NUDT16P1  | 3q22.1   | 0.25530517   | 0.000562 | 0.002274 |
| SOX2-OT   | 3q26.33  | -0.25528144  | 0.000563 | 0.002276 |
| SLC18B1   | 6q23.2   | -0.255272872 | 0.000563 | 0.002276 |
| HS6ST3    | 13q32.1  | -0.255268843 | 0.000563 | 0.002276 |
| ZP3       | 7q11.23  | 0.255267508  | 0.000563 | 0.002276 |
| ZMAT3     | 3q26.32  | -0.25523403  | 0.000564 | 0.00228  |
| GAB2      | 11q14.1  | -0.255225661 | 0.000565 | 0.00228  |
| PCYT1B    | Xp22.11  | -0.255225661 | 0.000565 | 0.00228  |
| TINAG     | 6p12.1   | 0.25515948   | 0.000567 | 0.002287 |
| FERMT2    | 14q22.1  | -0.255125228 | 0.000568 | 0.002291 |
| PRR18     | 6q27     | -0.255117314 | 0.000568 | 0.002291 |
| PRPF4B    | 6p25.2   | -0.255051995 | 0.00057  | 0.002299 |
| SQSTM1    | 5q35.3   | 0.255022702  | 0.000571 | 0.002302 |
| AMER3     | 2q21.1   | -0.255019711 | 0.000571 | 0.002302 |
| CYTH1     | 17q25.3  | 0.255003871  | 0.000571 | 0.002303 |
| TXLNG     | Xp22.2   | -0.254997594 | 0.000571 | 0.002303 |
| PBK       | 8p21.1   | 0.254991317  | 0.000572 | 0.002304 |
| CPVL      | 7p14.3   | -0.254876237 | 0.000575 | 0.002317 |
| TMEM243   | 7q21.12  | 0.25483439   | 0.000576 | 0.002321 |
| DNAJC5    | 20q13.33 | -0.254807189 | 0.000577 | 0.002324 |
| ZMIZ1-AS1 | 10q22.3  | 0.254708849  | 0.00058  | 0.002336 |
| ZNF791    | 19p13.13 | -0.254698387 | 0.00058  | 0.002336 |
| LOC401463 | 8q12.3   | -0.254677969 | 0.000581 | 0.002338 |
| RALGAPA2  | 20p11.23 | -0.254637708 | 0.000582 | 0.002343 |

|             |          |              |          |          |
|-------------|----------|--------------|----------|----------|
| NFKBIE      | 6p21.1   | 0.254631431  | 0.000582 | 0.002343 |
| UCHL1       | 4p13     | -0.254627247 | 0.000582 | 0.002343 |
| HIST2H4A    | 1q21.2   | 0.254560291  | 0.000584 | 0.002351 |
| ATP6V1B1    | 2p13.3   | 0.254539368  | 0.000585 | 0.002353 |
| RGS4        | 1q23.3   | -0.254533091 | 0.000585 | 0.002353 |
| MCF2L2      | 3q27.1   | -0.254528906 | 0.000585 | 0.002353 |
| C21ORF91    | 21q21.1  | -0.254522629 | 0.000586 | 0.002353 |
| MPEG1       | 11q12.1  | -0.254512167 | 0.000586 | 0.002354 |
| RPL3        | 22q13.1  | -0.25450589  | 0.000586 | 0.002354 |
| LOC10012817 | 17p13.1  | -0.254455673 | 0.000588 | 0.00236  |
| INPP5B      | 1p34.3   | -0.254420103 | 0.000589 | 0.002364 |
| LCE3D       | 1q21.3   | 0.254416202  | 0.000589 | 0.002364 |
| UTP23       | 8q24.11  | -0.254376164 | 0.00059  | 0.002368 |
| PPT2        | 6p21.32  | -0.25436361  | 0.00059  | 0.002369 |
| SYBU        | 8q23.2   | -0.254357333 | 0.000591 | 0.00237  |
| SLC25A1     | 22q11.21 | 0.254338501  | 0.000591 | 0.002372 |
| MMP13       | 11q22.2  | 0.254333398  | 0.000591 | 0.002372 |
| RUVBL2      | 19q13.33 | 0.254323855  | 0.000592 | 0.002372 |
| ZNF462      | 9q31.2   | -0.254307116 | 0.000592 | 0.002374 |
| SC02        | 22q13.33 | 0.254200406  | 0.000595 | 0.002387 |
| ZNF205      | 16p13.3  | 0.254162743  | 0.000597 | 0.002391 |
| NOTCH4      | 6p21.32  | -0.254156466 | 0.000597 | 0.002391 |
| CTBP1-DT    | 4p16.3   | -0.254154374 | 0.000597 | 0.002391 |
| PROZ        | 13q34    | -0.254136651 | 0.000597 | 0.002392 |
| ZNF704      | 8q21.13  | -0.254122989 | 0.000598 | 0.002394 |
| INSL5       | 1p31.3   | -0.254119859 | 0.000598 | 0.002394 |
| GLRB        | 4q32.1   | -0.254104158 | 0.000598 | 0.002395 |
| CRSP8P      | 5q14.1   | -0.254093696 | 0.000599 | 0.002396 |
| SPTBN5      | 15q15.1  | 0.254058126  | 0.0006   | 0.0024   |
| PPIAL4G     | 1q21.2   | 0.254053941  | 0.0006   | 0.0024   |
| NDUFB4      | 3q13.33  | 0.254016279  | 0.000601 | 0.002404 |
| COASY       | 17q21.2  | 0.253986986  | 0.000602 | 0.002407 |
| LOC220729   | 3q29     | 0.253943046  | 0.000603 | 0.002412 |
| TRIM34      | 11p15.4  | 0.253922122  | 0.000604 | 0.002414 |
| SHC4        | 15q21.1  | -0.253917938 | 0.000604 | 0.002414 |
| LARGE1      | 22q12.3  | -0.253850069 | 0.000606 | 0.002422 |
| N4BP3       | 5q35.3   | 0.25381332   | 0.000607 | 0.002426 |
| ZNRD1ASP    | 6p22.1   | -0.253804951 | 0.000608 | 0.002427 |
| MIER3       | 5q11.2   | -0.253786119 | 0.000608 | 0.002429 |
| C4ORF33     | 4q28.2   | 0.25377775   | 0.000608 | 0.002429 |
| DDX41       | 5q35.3   | 0.253740087  | 0.00061  | 0.002434 |
| LINC00847   | 5q35.3   | -0.253708702 | 0.000611 | 0.002437 |
| CCNY        | 10p11.21 | -0.253683594 | 0.000611 | 0.00244  |
| IL1RAP      | 3q28     | 0.253645931  | 0.000613 | 0.002443 |
| CAPZA1      | 1p13.2   | 0.253645931  | 0.000613 | 0.002443 |
| DLL3        | 19q13.2  | -0.253560744 | 0.000615 | 0.002454 |
| CRACR2A     | 12p13.32 | -0.253541314 | 0.000616 | 0.002456 |
| LRRK2       | 12q12    | -0.253524575 | 0.000616 | 0.002457 |
| RNF130      | 5q35.3   | -0.253478543 | 0.000618 | 0.002463 |
| LRRC37B     | 17q11.2  | -0.253472266 | 0.000618 | 0.002463 |
| RGS17       | 6q25.2   | -0.253447158 | 0.000619 | 0.002466 |
| DDX25       | 11q24.2  | -0.25341805  | 0.00062  | 0.002469 |
| PPARD       | 6p21.31  | 0.253407403  | 0.00062  | 0.00247  |
| CAPN10      | 2q37.3   | 0.253367648  | 0.000621 | 0.002474 |

|           |           |              |          |          |
|-----------|-----------|--------------|----------|----------|
| PCMTD2    | 20q13.33  | -0.253363463 | 0.000622 | 0.002474 |
| UQCRC1    | 3p21.31   | 0.253329986  | 0.000623 | 0.002478 |
| WHAMMP2   | 15q13.1   | -0.253325801 | 0.000623 | 0.002478 |
| CBARP     | 19p13.3   | -0.253158412 | 0.000628 | 0.002499 |
| RPP38     | 10p13     | 0.253116565  | 0.000629 | 0.002504 |
| NCR1      | 19q13.42  | -0.253090897 | 0.00063  | 0.002507 |
| CBLL1     | 7q22.3    | -0.253024501 | 0.000632 | 0.002515 |
| TNIP3     | 4q27      | -0.253007164 | 0.000633 | 0.002516 |
| GADD45G   | 9q22.2    | -0.253003578 | 0.000633 | 0.002516 |
| GLYATL3   | 6p12.3    | -0.252968716 | 0.000634 | 0.00252  |
| MYOC      | 1q24.3    | -0.252894602 | 0.000637 | 0.002529 |
| TLX1      | 10q24.31  | 0.252823654  | 0.000639 | 0.002538 |
| APOH      | 17q24.2   | -0.25280022  | 0.00064  | 0.002541 |
| GPR6      | 6q21      | -0.25279232  | 0.00064  | 0.002541 |
| SYT3      | 19q13.33  | -0.252759951 | 0.000641 | 0.002545 |
| COL19A1   | 6q13      | -0.252719743 | 0.000642 | 0.00255  |
| NDST4     | 4q26      | -0.252715404 | 0.000643 | 0.00255  |
| SLK       | 10q24.33- | 0.252691817  | 0.000643 | 0.002552 |
| SLC22A13  | 3p22.2    | 0.252689158  | 0.000643 | 0.002552 |
| STK25     | 2q37.3    | 0.252683447  | 0.000644 | 0.002552 |
| NPB       | 17q25.3   | 0.252637211  | 0.000645 | 0.002558 |
| TENM2     | 5q34      | -0.252564183 | 0.000648 | 0.002567 |
| ENTPD8    | 9q34.3    | 0.252555814  | 0.000648 | 0.002568 |
| CLASP1    | 2q14.2-q1 | -0.252503505 | 0.00065  | 0.002574 |
| TMEM25    | 11q23.3   | -0.252478396 | 0.00065  | 0.002576 |
| PSAPL1    | 4p16.1    | 0.252478023  | 0.00065  | 0.002576 |
| NEFM      | 8p21.2    | -0.252474212 | 0.000651 | 0.002576 |
| GGACT     | 13q32.3   | 0.252451196  | 0.000651 | 0.002579 |
| CIDEC     | 3p25.3    | 0.252411989  | 0.000653 | 0.002583 |
| JAKMIP3   | 10q26.3   | -0.252363317 | 0.000654 | 0.002589 |
| TAL2      | 9q31.2    | -0.252323264 | 0.000656 | 0.002594 |
| TRIM67    | 1q42.2    | -0.252315193 | 0.000656 | 0.002595 |
| SLC37A1   | 21q22.3   | 0.252302638  | 0.000656 | 0.002596 |
| SYNGAP1   | 6p21.32   | -0.252298454 | 0.000656 | 0.002596 |
| BZW2      | 7p21.1    | 0.252195928  | 0.00066  | 0.002609 |
| LINC00638 | 14q32.33  | -0.252185466 | 0.00066  | 0.00261  |
| C10ORF108 | 10q22.1   | -0.252175005 | 0.000661 | 0.00261  |
| XPOT      | 12q14.2   | -0.252172912 | 0.000661 | 0.00261  |
| RASIP1    | 19q13.33  | -0.25217082  | 0.000661 | 0.00261  |
| CAMK2D    | 4q26      | -0.252168728 | 0.000661 | 0.00261  |
| GRN       | 17q21.31  | 0.252149896  | 0.000661 | 0.002612 |
| STAB2     | 12q23.3   | -0.252099561 | 0.000663 | 0.002618 |
| KAT14     | 20p11.23  | -0.252043186 | 0.000665 | 0.002625 |
| LINC00552 | 13q34     | -0.251961047 | 0.000668 | 0.002636 |
| ZSCAN31   | 6p22.1 6p | -0.251959492 | 0.000668 | 0.002636 |
| NT5DC3    | 12q23.3   | -0.251944845 | 0.000668 | 0.002637 |
| NDFIP2    | 13q31.1   | 0.251926014  | 0.000669 | 0.002639 |
| PDGFRA    | 4q12      | -0.251919737 | 0.000669 | 0.002639 |
| PRMT8     | 12p13.32  | -0.251870335 | 0.000671 | 0.002645 |
| TANC1     | 2q24.2    | 0.251861151  | 0.000671 | 0.002646 |
| C17ORF82  | 17q23.2   | 0.251827674  | 0.000672 | 0.00265  |
| USP31     | 16p12.2   | -0.251798381 | 0.000673 | 0.002654 |
| MTMR9     | 8p23.1    | -0.251783734 | 0.000674 | 0.002655 |
| KLK6      | 19q13.41  | 0.251733942  | 0.000676 | 0.002661 |

|           |            |              |          |          |
|-----------|------------|--------------|----------|----------|
| LINC00339 | 1p36. 12   | -0.25170004  | 0.000677 | 0.002665 |
| RPGRIP1L  | 16q12. 2   | -0.251693763 | 0.000677 | 0.002665 |
| RPS6KA3   | Xp22. 12   | -0.251693763 | 0.000677 | 0.002665 |
| NUP205    | 7q33       | -0.2516561   | 0.000678 | 0.00267  |
| ZNF573    | 19q13. 12  | -0.251622623 | 0.000679 | 0.002674 |
| RNF215    | 22q12. 2   | 0.251607976  | 0.00068  | 0.002675 |
| FBXW9     | 19p13. 13  | 0.251580775  | 0.000681 | 0.002679 |
| LAMTOR1   | 11q13. 4   | 0.251576591  | 0.000681 | 0.002679 |
| GAR1      | 4q25       | 0.251568221  | 0.000681 | 0.002679 |
| ZNF669    | 1q44       | -0.251503358 | 0.000684 | 0.002688 |
| IFITM4P   | 6p22. 1    | 0.25146283   | 0.000685 | 0.002693 |
| NIT2      | 3q12. 2    | 0.251432218  | 0.000686 | 0.002696 |
| TUBA1A    | 12q13. 12  | -0.251392463 | 0.000687 | 0.002701 |
| ZC3H3     | 8q24. 3    | 0.251386186  | 0.000688 | 0.002702 |
| MEP1B     | 18q12. 1   | -0.251379759 | 0.000688 | 0.002702 |
| PKN1      | 19p13. 12  | 0.251342247  | 0.000689 | 0.002706 |
| MIER2     | 19p13. 3   | 0.251340154  | 0.000689 | 0.002706 |
| LYSMD4    | 15q26. 3   | 0.251310861  | 0.00069  | 0.00271  |
| FBXO27    | 19q13. 2   | -0.251271107 | 0.000692 | 0.002715 |
| PCDHGA5   | 5q31. 3    | -0.25125646  | 0.000692 | 0.002716 |
| NETO2     | 16q12. 1   | -0.251252275 | 0.000692 | 0.002716 |
| AK2       | 1p35. 1    | 0.251195782  | 0.000694 | 0.002723 |
| MRPS22    | 3q23       | 0.251193689  | 0.000694 | 0.002723 |
| MLH1      | 3p22. 2    | -0.251183228 | 0.000695 | 0.002724 |
| PCDHB6    | 5q31. 3    | -0.251172766 | 0.000695 | 0.002725 |
| DACH1     | 13q21. 33  | -0.251130919 | 0.000697 | 0.00273  |
| IFITM3    | 11p15. 5   | 0.251103718  | 0.000698 | 0.002734 |
| CSTF1     | 20q13. 2-c | -0.251095349 | 0.000698 | 0.002734 |
| SLC7A14   | 3q26. 2    | -0.251075503 | 0.000699 | 0.002737 |
| ADRM1     | 20q13. 33  | 0.250997008  | 0.000701 | 0.002747 |
| CDK5RAP3  | 17q21. 32  | 0.250986546  | 0.000702 | 0.002748 |
| TAFA4     | 3p14. 1    | -0.250980285 | 0.000702 | 0.002748 |
| NOP16     | 5q35. 2    | 0.250965623  | 0.000703 | 0.002749 |
| PDF       | 16q22. 1   | 0.250965623  | 0.000703 | 0.002749 |
| MSL3      | Xp22. 2    | -0.250923775 | 0.000704 | 0.002754 |
| VSIG10L   | 19q13. 41  | 0.250923775  | 0.000704 | 0.002754 |
| EFTUD2    | 17q21. 31  | 0.250907037  | 0.000705 | 0.002756 |
| KCNQ4     | 1p34. 2    | 0.250875013  | 0.000706 | 0.00276  |
| TEP1      | 14q11. 2   | 0.250858912  | 0.000706 | 0.002761 |
| CASTOR3   | 7q22. 1    | -0.250854728 | 0.000707 | 0.002761 |
| GNAT2     | 1p13. 3    | -0.250854494 | 0.000707 | 0.002761 |
| TMEM237   | 2q33. 1    | -0.250764756 | 0.00071  | 0.002773 |
| SATB1     | 3p24. 3    | -0.250758479 | 0.00071  | 0.002773 |
| TLE2      | 19p13. 3   | -0.250727094 | 0.000711 | 0.002777 |
| KLHL24    | 3q27. 1    | -0.250718724 | 0.000711 | 0.002778 |
| MLYCD     | 16q23. 3   | -0.250668508 | 0.000713 | 0.002784 |
| TMEM236   | 10p12. 33  | -0.250667593 | 0.000713 | 0.002784 |
| PLPP1     | 5q11. 2    | -0.250609922 | 0.000715 | 0.002791 |
| NEDD1     | 12q23. 1   | -0.25060783  | 0.000715 | 0.002791 |
| KLRC4     | 12p13. 2   | -0.250602118 | 0.000716 | 0.002792 |
| USP8      | 15q21. 2   | -0.250595275 | 0.000716 | 0.002792 |
| B4GALNT3  | 12p13. 33  | 0.250591091  | 0.000716 | 0.002792 |
| PCYOX1    | 2p13. 3    | -0.250547151 | 0.000718 | 0.002798 |
| SLC01C1   | 12p12. 2   | -0.250535659 | 0.000718 | 0.002799 |

|           |            |               |           |           |
|-----------|------------|---------------|-----------|-----------|
| LAMB2     | 3p21. 31   | 0. 250526228  | 0. 000718 | 0. 0028   |
| DIPK2B    | Xp11. 3    | -0. 250444626 | 0. 000721 | 0. 002811 |
| PTCH1     | 9q22. 32   | -0. 25041324  | 0. 000723 | 0. 002815 |
| RBM12     | 20q11. 22  | -0. 250360932 | 0. 000725 | 0. 002822 |
| SLC16A2   | Xq13. 2    | -0. 25030653  | 0. 000727 | 0. 002829 |
| PRRG4     | 11p13      | 0. 250260498  | 0. 000728 | 0. 002835 |
| PARP10    | 8q24. 3    | 0. 250252129  | 0. 000729 | 0. 002836 |
| GINS2     | 16q24. 1   | 0. 25024376   | 0. 000729 | 0. 002836 |
| RBSN      | 3p25. 1    | -0. 250220744 | 0. 00073  | 0. 002839 |
| CDC45     | 22q11. 21  | 0. 250195635  | 0. 000731 | 0. 002842 |
| FBX08     | 4q34. 1    | -0. 250120311 | 0. 000733 | 0. 002852 |
| MBNL1     | 3q25. 1-q2 | -0. 250111941 | 0. 000734 | 0. 002853 |
| FSIP1     | 15q14      | -0. 250047209 | 0. 000736 | 0. 002861 |
| ZNF436    | 1p36. 12   | -0. 250047078 | 0. 000736 | 0. 002861 |
| ADAMTS3   | 4q13. 3    | -0. 249992677 | 0. 000738 | 0. 002869 |
| ZNF678    | 1q42. 13   | -0. 249962468 | 0. 000739 | 0. 002873 |
| PECAM1    | 17q23. 3   | -0. 249957107 | 0. 00074  | 0. 002873 |
| HTATSF1   | Xq26. 3    | -0. 249931998 | 0. 00074  | 0. 002876 |
| CITED4    | 1p34. 2 1r | 0. 249919444  | 0. 000741 | 0. 002877 |
| FEM1A     | 19p13. 3   | -0. 24990689  | 0. 000741 | 0. 002878 |
| TCF4      | 18q21. 2   | -0. 249892244 | 0. 000742 | 0. 00288  |
| NDUFAF4   | 6q16. 1    | -0. 249862951 | 0. 000743 | 0. 002883 |
| FARP2     | 2q37. 3    | 0. 249860858  | 0. 000743 | 0. 002883 |
| STAB1     | 3p21. 1    | -0. 249860858 | 0. 000743 | 0. 002883 |
| HIRIP3    | 16p11. 2   | -0. 24980018  | 0. 000745 | 0. 002891 |
| RAB27A    | 15q21. 3   | -0. 249798088 | 0. 000745 | 0. 002891 |
| LGALS1    | 22q13. 1   | 0. 249787626  | 0. 000746 | 0. 002892 |
| DENND6B   | 22q13. 33  | 0. 249779256  | 0. 000746 | 0. 002893 |
| IL1RAPL1  | Xp21. 3-p2 | -0. 249765414 | 0. 000747 | 0. 002894 |
| CRB1      | 1q31. 3    | -0. 249676029 | 0. 00075  | 0. 002907 |
| HGF       | 7q21. 11   | -0. 249659992 | 0. 000751 | 0. 002908 |
| PAFAH1B3  | 19q13. 2   | 0. 2496579    | 0. 000751 | 0. 002908 |
| LINC00592 | 12q13. 13  | 0. 24964661   | 0. 000751 | 0. 002909 |
| FGL2      | 7q11. 23   | -0. 249632791 | 0. 000752 | 0. 002911 |
| KRTAP5-9  | 11q13. 4   | 0. 249625975  | 0. 000752 | 0. 002911 |
| PCDH15    | 10q21. 1   | -0. 249588796 | 0. 000753 | 0. 002916 |
| PYM1      | 12q13. 2   | 0. 249565836  | 0. 000754 | 0. 002919 |
| TRPM7     | 15q21. 2   | -0. 24955119  | 0. 000755 | 0. 002921 |
| C3ORF36   | 3q22. 1    | -0. 249511435 | 0. 000756 | 0. 002925 |
| ZNF81     | Xp11. 23   | -0. 249511435 | 0. 000756 | 0. 002925 |
| DHX32     | 10q26. 2   | 0. 24939217   | 0. 000761 | 0. 002942 |
| PRSS55    | 8p23. 1    | 0. 24931418   | 0. 000764 | 0. 002953 |
| SEL1L     | 14q31. 1   | -0. 249251983 | 0. 000766 | 0. 002962 |
| BDH2      | 4q24       | 0. 249239686  | 0. 000767 | 0. 002963 |
| GLYAT     | 11q12. 1   | -0. 249228511 | 0. 000767 | 0. 002965 |
| MTERF4    | 2q37. 3    | -0. 249170381 | 0. 00077  | 0. 002973 |
| ST8SIA2   | 15q26. 1   | 0. 249156248  | 0. 00077  | 0. 002974 |
| PKNOX1    | 21q22. 3   | -0. 249132718 | 0. 000771 | 0. 002977 |
| TBC1D12   | 10q23. 33  | -0. 249124349 | 0. 000771 | 0. 002978 |
| FAM66C    | 12p13. 31  | -0. 24910761  | 0. 000772 | 0. 00298  |
| CLEC3B    | 3p21. 31   | -0. 249105518 | 0. 000772 | 0. 00298  |
| GSTO2     | 10q25. 1   | 0. 24907204   | 0. 000773 | 0. 002984 |
| TMEM173   | 5q31. 2    | 0. 249019731  | 0. 000775 | 0. 002991 |
| CHD3      | 17p13. 1   | -0. 249015546 | 0. 000776 | 0. 002991 |



|           |            |               |           |           |
|-----------|------------|---------------|-----------|-----------|
| NDUFAF7   | 2p22. 2    | 0. 248936037  | 0. 000779 | 0. 003001 |
| SYDE2     | 1p22. 3    | -0. 248936037 | 0. 000779 | 0. 003001 |
| ZNF382    | 19q13. 12  | -0. 248936037 | 0. 000779 | 0. 003001 |
| ZNF280D   | 15q21. 3   | -0. 248931852 | 0. 000779 | 0. 003001 |
| ZFYVE26   | 14q24. 1   | -0. 248931852 | 0. 000779 | 0. 003001 |
| DCAF16    | 4p15. 31   | -0. 248887912 | 0. 000781 | 0. 003007 |
| POLR1D    | 13q12. 2   | 0. 248839788  | 0. 000782 | 0. 003014 |
| HOXA11    | 7p15. 2    | 0. 248828994  | 0. 000783 | 0. 003015 |
| RBP5      | 12p13. 31  | -0. 248825142 | 0. 000783 | 0. 003015 |
| LOC154449 | 6q27       | -0. 248815743 | 0. 000783 | 0. 003016 |
| CEP41     | 7q32. 2    | -0. 248791664 | 0. 000784 | 0. 003019 |
| ABCA6     | 17q24. 2-c | -0. 248789572 | 0. 000784 | 0. 003019 |
| IGFBPL1   | 9p13. 1    | -0. 248743196 | 0. 000786 | 0. 003025 |
| SLC35A1   | 6q15       | 0. 248701693  | 0. 000788 | 0. 003031 |
| UBP1      | 3p22. 3    | -0. 248678677 | 0. 000789 | 0. 003034 |
| TRMT10A   | 4q23       | -0. 248643107 | 0. 00079  | 0. 003039 |
| MRPL23    | 11p15. 5   | 0. 248607537  | 0. 000792 | 0. 003043 |
| VIT       | 2p22. 2    | -0. 248606855 | 0. 000792 | 0. 003043 |
| SSBP1     | 7q34       | 0. 248571967  | 0. 000793 | 0. 003048 |
| POLQ      | 3q13. 33   | 0. 248551043  | 0. 000794 | 0. 003051 |
| ERBB3     | 12q13. 2   | 0. 248488272  | 0. 000796 | 0. 00306  |
| CCNK      | 14q32. 2   | 0. 248484088  | 0. 000797 | 0. 00306  |
| PCDHGA3   | 5q31. 3    | -0. 24844237  | 0. 000798 | 0. 003065 |
| PRSS36    | 16p11. 2   | 0. 248385747  | 0. 000801 | 0. 003074 |
| ANGPTL1   | 1q25. 2    | -0. 248348084 | 0. 000802 | 0. 003079 |
| CDKN2D    | 19p13. 2   | 0. 248281129  | 0. 000805 | 0. 003088 |
| OAT       | 10q26. 13  | -0. 248279037 | 0. 000805 | 0. 003088 |
| ATXN10    | 22q13. 31  | -0. 24827276  | 0. 000805 | 0. 003089 |
| HAUS3     | 4p16. 3    | -0. 248266483 | 0. 000805 | 0. 003089 |
| RPS6KA2   | 6q27       | -0. 248220451 | 0. 000807 | 0. 003095 |
| BRAF      | 7q34       | -0. 248218358 | 0. 000807 | 0. 003095 |
| TROAP     | 12q13. 12  | 0. 248153495  | 0. 00081  | 0. 003105 |
| LDLRAD4   | 18p11. 21  | -0. 248140941 | 0. 000811 | 0. 003106 |
| SRCAP     | 16p11. 2   | 0. 248115833  | 0. 000812 | 0. 00311  |
| CFAP61    | 20p11. 23  | -0. 2480756   | 0. 000813 | 0. 003115 |
| SAMD13    | 1p31. 1    | 0. 248073986  | 0. 000813 | 0. 003115 |
| EPHB1     | 3q22. 2    | -0. 248048877 | 0. 000814 | 0. 003118 |
| GCHFR     | 15q15. 1   | 0. 2480426    | 0. 000815 | 0. 003119 |
| CBR4      | 4q32. 3    | -0. 248017492 | 0. 000816 | 0. 003122 |
| KATNAL1   | 13q12. 3   | -0. 2480154   | 0. 000816 | 0. 003122 |
| RRM2      | 2p25. 1    | 0. 247994476  | 0. 000817 | 0. 003125 |
| DSCAML1   | 11q23. 3   | -0. 247975775 | 0. 000817 | 0. 003127 |
| CISH      | 3p21. 2    | -0. 247965183 | 0. 000818 | 0. 003128 |
| RNF128    | Xq22. 3    | 0. 247963091  | 0. 000818 | 0. 003128 |
| SNRPD2    | 19q13. 32  | 0. 247937983  | 0. 000819 | 0. 003131 |
| PLXNB3    | Xq28       | 0. 247927521  | 0. 000819 | 0. 003132 |
| POU3F2    | 6q16. 1    | -0. 247884755 | 0. 000821 | 0. 003138 |
| SNORA81   | 3q27. 3    | 0. 247806782  | 0. 000824 | 0. 00315  |
| ZNF70     | 22q11. 23  | -0. 24771423  | 0. 000828 | 0. 003164 |
| VPS28     | 8q24. 3    | 0. 247695269  | 0. 000829 | 0. 003166 |
| CLDN1     | 3q28       | 0. 247693177  | 0. 000829 | 0. 003166 |
| RAB11FIP1 | 8p11. 23   | 0. 247670161  | 0. 00083  | 0. 003169 |
| ZNF311    | 6p22. 1    | 0. 247622037  | 0. 000832 | 0. 003176 |
| SENP7     | 3q12. 3    | -0. 247619944 | 0. 000832 | 0. 003176 |

|                    |               |           |           |
|--------------------|---------------|-----------|-----------|
| LOC1001283q26. 2   | -0. 247594867 | 0. 000833 | 0. 003179 |
| CCDC30 1p34. 2     | -0. 247573912 | 0. 000834 | 0. 003182 |
| EFCAB7 1p31. 3     | -0. 24753625  | 0. 000836 | 0. 003188 |
| CHRAC1 8q24. 3     | 0. 247452556  | 0. 000839 | 0. 0032   |
| P2RY8 Xp22. 33 ε   | -0. 247379323 | 0. 000842 | 0. 003211 |
| PNPLA8 7q31. 1     | -0. 247303998 | 0. 000845 | 0. 003223 |
| SPATA13 13q12. 12  | -0. 247283075 | 0. 000846 | 0. 003226 |
| CPT1C 19q13. 33    | -0. 247268428 | 0. 000847 | 0. 003228 |
| SUPT20H 13q13. 3   | 0. 247247505  | 0. 000848 | 0. 00323  |
| ENKD1 16q22. 1     | 0. 247237043  | 0. 000848 | 0. 003231 |
| CST2 20p11. 21     | 0. 247209972  | 0. 000849 | 0. 003234 |
| KCNJ11 11p15. 1    | -0. 247209842 | 0. 000849 | 0. 003234 |
| UCN 2p23. 3        | 0. 247208151  | 0. 000849 | 0. 003234 |
| MAFB 20q12         | -0. 247184734 | 0. 00085  | 0. 003237 |
| ZNF665 19q13. 42   | -0. 247179633 | 0. 000851 | 0. 003238 |
| C10ORF88 10q26. 13 | -0. 247174272 | 0. 000851 | 0. 003238 |
| UBE2Z 17q21. 32    | 0. 247153349  | 0. 000852 | 0. 003241 |
| IMP4 2q21. 1       | 0. 247132425  | 0. 000853 | 0. 003243 |
| GAN 16q23. 2       | 0. 247086393  | 0. 000855 | 0. 00325  |
| PATJ 1p31. 3       | 0. 247086393  | 0. 000855 | 0. 00325  |
| EPCAM 2p21         | 0. 247067562  | 0. 000855 | 0. 003252 |
| REG4 1p12          | 0. 247039445  | 0. 000857 | 0. 003256 |
| MTMR4 17q22        | -0. 247017346 | 0. 000858 | 0. 003259 |
| BMP1 8p21. 3       | 0. 246996422  | 0. 000858 | 0. 003262 |
| RBM8A 1q21. 1      | 0. 246975499  | 0. 000859 | 0. 003265 |
| ETFA 15q24. 2-c    | 0. 24695876   | 0. 00086  | 0. 003267 |
| ACSM5 16p12. 3     | -0. 246943313 | 0. 000861 | 0. 003269 |
| RELB 19q13. 32     | 0. 246904358  | 0. 000862 | 0. 003274 |
| COLGALT1 19p13. 11 | 0. 24688762   | 0. 000863 | 0. 003277 |
| SERF2 15q15. 3     | 0. 246877158  | 0. 000864 | 0. 003278 |
| GFOD2 16q22. 1     | -0. 246856234 | 0. 000864 | 0. 00328  |
| DERA 12p12. 3      | 0. 246852049  | 0. 000865 | 0. 003281 |
| CEP72 5p15. 33     | 0. 246826941  | 0. 000866 | 0. 003284 |
| ZSWIM2 2q32. 1     | -0. 246825984 | 0. 000866 | 0. 003284 |
| HYAL1 3p21. 31     | 0. 246816479  | 0. 000866 | 0. 003285 |
| ZNF324 19q13. 43   | -0. 246797648 | 0. 000867 | 0. 003287 |
| RAB28 4p15. 33     | -0. 246793463 | 0. 000867 | 0. 003287 |
| LDLRAP1 1p36. 11   | -0. 246787186 | 0. 000867 | 0. 003287 |
| JAKMIP1 4p16. 1    | -0. 246761277 | 0. 000869 | 0. 003291 |
| ZNF524 19q13. 42   | 0. 246741155  | 0. 000869 | 0. 003294 |
| PIP4P2 8q21. 3     | -0. 246718139 | 0. 00087  | 0. 003297 |
| SNX18 5q11. 2      | -0. 246713954 | 0. 000871 | 0. 003297 |
| RHOT1 17q11. 2     | -0. 246699307 | 0. 000871 | 0. 003299 |
| PRRX2 9q34. 11     | 0. 246684661  | 0. 000872 | 0. 003301 |
| ARRB2 17p13. 2     | -0. 24665746  | 0. 000873 | 0. 003304 |
| GCSAML 1q44        | -0. 246604607 | 0. 000875 | 0. 003313 |
| PAX8-AS1 2q14. 1   | 0. 246600967  | 0. 000876 | 0. 003313 |
| CCDC74A 2q21. 1    | 0. 246596782  | 0. 000876 | 0. 003313 |
| SULT1B1 4q13. 3    | 0. 246558331  | 0. 000877 | 0. 003318 |
| FREM1 9p22. 3      | -0. 246554935 | 0. 000878 | 0. 003318 |
| PRMT7 16q22. 1     | 0. 246546565  | 0. 000878 | 0. 003319 |
| CCDC66 3p14. 3     | -0. 246542381 | 0. 000878 | 0. 003319 |
| LRFN5 14q21. 1     | -0. 246527734 | 0. 000879 | 0. 003321 |
| FEZF1 7q31. 32     | 0. 246521691  | 0. 000879 | 0. 003321 |

|           |           |              |          |          |
|-----------|-----------|--------------|----------|----------|
| ANXA8L1   | 10q11.22  | 0.246492005  | 0.00088  | 0.003326 |
| DOCK8     | 9p24.3    | -0.246487979 | 0.000881 | 0.003326 |
| NUTM1     | 15q14     | 0.246477709  | 0.000881 | 0.003327 |
| ARHGAP1   | 11p11.2   | 0.246467056  | 0.000881 | 0.003328 |
| SCAMP3    | 1q22      | 0.246421024  | 0.000883 | 0.003335 |
| NHSL1     | 6q24.1    | -0.24640847  | 0.000884 | 0.003336 |
| RHOH      | 4p14      | -0.246370807 | 0.000886 | 0.003342 |
| TPM3      | 1q21.3    | 0.246345699  | 0.000887 | 0.003346 |
| SOWAHA    | 5q31.1    | -0.246322683 | 0.000888 | 0.003349 |
| SAMD5     | 6q24.3    | -0.246308037 | 0.000888 | 0.003351 |
| IGF2BP3   | 7p15.3    | 0.246285021  | 0.00089  | 0.003354 |
| MDH1B     | 2q33.3    | -0.246213881 | 0.000893 | 0.003365 |
| CHST6     | 16q23.1   | 0.246160654  | 0.000895 | 0.003373 |
| WDR62     | 19q13.12  | 0.246107171  | 0.000897 | 0.003382 |
| JAG1      | 20p12.2   | 0.246082062  | 0.000899 | 0.003385 |
| ST3GAL2   | 16q22.1   | -0.246065323 | 0.000899 | 0.003388 |
| CPNE7     | 16q24.3   | 0.246038123  | 0.000901 | 0.003392 |
| ETFDH     | 4q32.1    | -0.246015107 | 0.000902 | 0.003395 |
| PENK      | 8q12.1    | -0.245973774 | 0.000903 | 0.003401 |
| FAM98B    | 15q14     | -0.245966983 | 0.000904 | 0.003402 |
| ZNF354A   | 5q35.3    | -0.245962798 | 0.000904 | 0.003402 |
| ZDHHC13   | 11p15.1   | 0.245941874  | 0.000905 | 0.003405 |
| EIF3A     | 10q26.11  | -0.245912581 | 0.000906 | 0.003409 |
| TMEM184A  | 7p22.3    | 0.245891658  | 0.000907 | 0.003412 |
| SPRYD3    | 12q13.13  | -0.245874919 | 0.000908 | 0.003414 |
| FUT4      | 11q21     | 0.245860272  | 0.000909 | 0.003416 |
| SLC25A26  | 3p14.1    | 0.245849811  | 0.000909 | 0.003417 |
| RNF183    | 9q32      | 0.245816333  | 0.000911 | 0.003422 |
| GPATCH11  | 2p22.2    | -0.245805871 | 0.000911 | 0.003423 |
| KYAT3     | 1p22.2    | 0.245801686  | 0.000911 | 0.003423 |
| IL1R1     | 2q11.2-q1 | -0.245694976 | 0.000916 | 0.003441 |
| CLIP1     | 12q24.31  | -0.245661499 | 0.000918 | 0.003446 |
| PNCK      | Xq28      | 0.245617836  | 0.00092  | 0.003453 |
| PIP5KL1   | 9q34.11   | 0.245566425  | 0.000922 | 0.003461 |
| CENPC     | 4q13.2    | -0.245489925 | 0.000925 | 0.003474 |
| BABAM1    | 19p13.11  | 0.245464817  | 0.000927 | 0.003477 |
| PLEKHA5   | 12p12.3   | 0.245460632  | 0.000927 | 0.003477 |
| RUSC1-AS1 | 11q22     | 0.245454355  | 0.000927 | 0.003478 |
| HLA-J     | 6p22.1    | 0.245393677  | 0.00093  | 0.003488 |
| NBN       | 8q21.3    | -0.245383215 | 0.00093  | 0.003489 |
| SMARCA4   | 19p13.2   | 0.245345553  | 0.000932 | 0.003495 |
| FCN3      | 1p36.11   | -0.245339276 | 0.000932 | 0.003495 |
| GPR19     | 12p13.1   | -0.245328814 | 0.000933 | 0.003496 |
| GPR162    | 12p13.31  | -0.245263951 | 0.000936 | 0.003507 |
| HTR2A     | 13q14.2   | -0.24523959  | 0.000937 | 0.003511 |
| DNAAF1    | 16q24.1   | -0.245215213 | 0.000938 | 0.003514 |
| SH3GL3    | 15q25.2   | -0.245185981 | 0.00094  | 0.003519 |
| GAB3      | Xq28      | -0.245182349 | 0.00094  | 0.003519 |
| PAPOLB    | 7p22.1    | -0.245176329 | 0.00094  | 0.003519 |
| NUBPL     | 14q12     | -0.245146779 | 0.000941 | 0.003524 |
| PRELID1   | 5q35.3    | 0.245113301  | 0.000943 | 0.003529 |
| SECISBP2  | 9q22.2    | -0.24509447  | 0.000944 | 0.003531 |
| RPL6      | 12q24.13  | -0.245079823 | 0.000945 | 0.003533 |
| CC2D1B    | 1p32.3    | 0.245069362  | 0.000945 | 0.003534 |

|           |           |              |          |          |
|-----------|-----------|--------------|----------|----------|
| PGAP3     | 17q12     | 0.245054715  | 0.000946 | 0.003536 |
| LDHB      | 12p12.1   | -0.245035884 | 0.000947 | 0.003539 |
| TTPAL     | 20q13.12  | -0.245025422 | 0.000947 | 0.003539 |
| AK3       | 9p24.1    | -0.24502333  | 0.000947 | 0.003539 |
| DRAP1     | 11q13.1   | 0.24502333   | 0.000947 | 0.003539 |
| NCKAP5    | 2q21.2    | -0.244977298 | 0.000949 | 0.003547 |
| ABCA7     | 19p13.3   | 0.244941728  | 0.000951 | 0.003552 |
| ZNF189    | 9q31.1    | -0.244878957 | 0.000954 | 0.003563 |
| GABARAPL3 | 15q26.1   | -0.244875754 | 0.000954 | 0.003563 |
| SEC16B    | 1q25.2    | 0.244807817  | 0.000957 | 0.003574 |
| RAC2      | 22q13.1   | 0.244753416  | 0.00096  | 0.003583 |
| ZMYND12   | 1p34.2    | -0.244749231 | 0.00096  | 0.003583 |
| SLC25A45  | 11q13.1   | -0.244701107 | 0.000962 | 0.003591 |
| PDXK      | 21q22.3   | 0.244699015  | 0.000963 | 0.003591 |
| ZNF827    | 4q31.21-c | -0.24469483  | 0.000963 | 0.003591 |
| NDUFS8    | 11q13.2   | 0.244583935  | 0.000968 | 0.00361  |
| ZNF548    | 19q13.43  | -0.244569288 | 0.000969 | 0.003612 |
| KIAA0408  | 6q22.33   | -0.244529409 | 0.000971 | 0.003618 |
| LHFPL6    | 13q13.3-c | -0.244498148 | 0.000972 | 0.003623 |
| QKI       | 6q26      | -0.244470948 | 0.000974 | 0.003627 |
| C2ORF66   | 2q33.1    | -0.244452419 | 0.000974 | 0.00363  |
| PURB      | 7p13      | -0.24443747  | 0.000975 | 0.003632 |
| WHAMMP3   | 15q11.2   | -0.244422823 | 0.000976 | 0.003634 |
| DEGS2     | 14q32.2   | 0.244412362  | 0.000976 | 0.003635 |
| GARNL3    | 9q33.3    | -0.244360053 | 0.000979 | 0.003644 |
| FSHB      | 11p14.1   | -0.244354971 | 0.000979 | 0.003644 |
| ETV4      | 17q21.31  | 0.24429519   | 0.000982 | 0.003654 |
| TRIM61    | 4q32.3    | -0.244289376 | 0.000982 | 0.003655 |
| IFNA21    | 9p21.3    | -0.244280883 | 0.000983 | 0.003656 |
| MYO15B    | 17q25.1   | 0.24425962   | 0.000984 | 0.003659 |
| EZH1P     | Xp11.22   | -0.244196438 | 0.000987 | 0.00367  |
| RBL2      | 16q12.2   | -0.244142448 | 0.000989 | 0.003679 |
| TAZ       | Xq28      | 0.244136171  | 0.00099  | 0.003679 |
| MFAP3     | 5q33.2    | -0.24410897  | 0.000991 | 0.003683 |
| TXNL4A    | 18q23     | -0.244050384 | 0.000994 | 0.003693 |
| POM121    | 7q11.23   | -0.244044107 | 0.000994 | 0.003694 |
| DCTPP1    | 16p11.2   | 0.24402946   | 0.000995 | 0.003695 |
| EHD3      | 2p23.1    | -0.24402946  | 0.000995 | 0.003695 |
| FAM74A3   | 9q21.11   | -0.244024709 | 0.000995 | 0.003695 |
| ZBTB5     | 9p13.2    | -0.243979244 | 0.000997 | 0.003703 |
| IMPG2     | 3q12.3    | -0.243978157 | 0.000998 | 0.003703 |
| FYCO1     | 3p21.31   | -0.24396669  | 0.000998 | 0.003704 |
| SEMA3F    | 3p21.31   | 0.243945766  | 0.000999 | 0.003707 |
| ACVRL1    | 12q13.13  | -0.243929027 | 0.001    | 0.003709 |
| FILIP1L   | 3q12.1    | -0.243906011 | 0.001001 | 0.003713 |
| SNRPD1    | 18q11.2   | 0.243903919  | 0.001001 | 0.003713 |
| ATP8B4    | 15q21.2   | -0.243853702 | 0.001004 | 0.003721 |
| KLF11     | 2p25.1    | -0.243784655 | 0.001007 | 0.003733 |
| FBXL18    | 7p22.1    | -0.243734438 | 0.00101  | 0.003742 |
| PRSS35    | 6q14.2    | -0.243686441 | 0.001012 | 0.00375  |
| SELPLG    | 12q24.11  | 0.243669575  | 0.001013 | 0.003752 |
| TPRXL     | 3p25.1    | 0.2436659    | 0.001013 | 0.003752 |
| SETD1B    | 12q24.31  | -0.243617266 | 0.001016 | 0.00376  |
| CCNE1     | 19q12     | 0.243615174  | 0.001016 | 0.00376  |

|          |          |              |          |          |
|----------|----------|--------------|----------|----------|
| TGM2     | 20q11.23 | 0.243610989  | 0.001016 | 0.003761 |
| BUD23    | 7q11.23  | 0.243544034  | 0.001019 | 0.003772 |
| DAG1     | 3p21.31  | 0.243537757  | 0.001019 | 0.003773 |
| MIPEP    | 13q12.12 | 0.243533572  | 0.00102  | 0.003773 |
| TESMIN   | 11q13.3  | 0.243527295  | 0.00102  | 0.003773 |
| NME2P1   | 12q24.23 | 0.243514741  | 0.001021 | 0.003775 |
| TRIP11   | 14q32.12 | -0.243490806 | 0.001022 | 0.003779 |
| HEPACAM2 | 7q21.2   | -0.243474167 | 0.001023 | 0.003781 |
| VPS13B   | 8q22.2   | -0.243464524 | 0.001023 | 0.003782 |
| DDX20    | 1p13.2   | -0.243439543 | 0.001024 | 0.003786 |
| NFIC     | 19p13.3  | -0.243439416 | 0.001024 | 0.003786 |
| KEAP1    | 19p13.2  | 0.243424769  | 0.001025 | 0.003787 |
| CERS1    | 19p13.11 | -0.243422677 | 0.001025 | 0.003787 |
| AKAP11   | 13q14.11 | -0.243418492 | 0.001026 | 0.003787 |
| PDE6C    | 10q23.33 | -0.243413688 | 0.001026 | 0.003788 |
| CALCR    | 7q21.3   | -0.243395557 | 0.001027 | 0.00379  |
| ECI2     | 6p25.2   | -0.243370368 | 0.001028 | 0.003794 |
| ZNF513   | 2p23.3   | 0.243368276  | 0.001028 | 0.003794 |
| NR1D2    | 3p24.2   | -0.24333689  | 0.00103  | 0.003799 |
| BMT2     | 7q31.1   | -0.243313874 | 0.001031 | 0.003802 |
| NSMAF    | 8q12.1   | -0.24330969  | 0.001031 | 0.003802 |
| PAX9     | 14q13.3  | 0.24330887   | 0.001031 | 0.003802 |
| RECQL4   | 8q24.3   | 0.243267843  | 0.001033 | 0.003809 |
| CCDC112  | 5q22.3   | -0.243263658 | 0.001033 | 0.003809 |
| SIGIRR   | 11p15.5  | 0.243219718  | 0.001036 | 0.003817 |
| MRPL9    | 1q21.3   | 0.243200887  | 0.001037 | 0.00382  |
| TBC1D10B | 16p11.2  | 0.243196702  | 0.001037 | 0.00382  |
| HLA-F    | 6p22.1   | 0.243175779  | 0.001038 | 0.003823 |
| TFF3     | 21q22.3  | 0.243163225  | 0.001039 | 0.003824 |
| SPIN1    | 9q22.1   | -0.243161132 | 0.001039 | 0.003824 |
| SCARA5   | 8p21.1   | -0.243147799 | 0.001039 | 0.003826 |
| TKTL1    | Xq28     | -0.243122235 | 0.001041 | 0.00383  |
| NECAP2   | 1p36.13  | 0.243069069  | 0.001043 | 0.00384  |
| NUDT13   | 10q22.2  | 0.243033499  | 0.001045 | 0.003846 |
| OTULIN   | 5p15.2   | -0.243029314 | 0.001045 | 0.003846 |
| LCN1     | 9q34.3   | 0.24296873   | 0.001049 | 0.003857 |
| KBTBD8   | 3p14.1   | -0.242964451 | 0.001049 | 0.003857 |
| SLC25A11 | 17p13.2  | -0.242939343 | 0.00105  | 0.003861 |
| SNORA12  | 10q24.31 | -0.24292877  | 0.001051 | 0.003861 |
| MAP6D1   | 3q27.1   | -0.242927962 | 0.001051 | 0.003861 |
| CEP350   | 1q25.2   | -0.242926788 | 0.001051 | 0.003861 |
| CISD1    | 10q21.1  | -0.242884941 | 0.001053 | 0.003868 |
| FANCD2OS | 3p25.3   | 0.242863019  | 0.001054 | 0.003872 |
| ZNF232   | 17p13.2  | -0.242807524 | 0.001057 | 0.003882 |
| ADORA2A  | 22q11.23 | -0.24279413  | 0.001058 | 0.003883 |
| ZSWIM7   | 17p12    | -0.242778231 | 0.001058 | 0.003886 |
| PIP4K2B  | 17q12    | -0.242763585 | 0.001059 | 0.003888 |
| BTBD1    | 15q25.2  | -0.242728015 | 0.001061 | 0.003894 |
| RPL39L   | 3q27.3   | 0.242725922  | 0.001061 | 0.003894 |
| TXLNB    | 6q24.1   | -0.242702906 | 0.001062 | 0.003897 |
| NRROS    | 3q29     | -0.242698722 | 0.001063 | 0.003897 |
| MBD5     | 2q23.1   | -0.24268826  | 0.001063 | 0.003899 |
| TMEM232  | 5q22.1   | -0.24268119  | 0.001063 | 0.003899 |
| ZMIZ2    | 7p13     | 0.242575273  | 0.001069 | 0.003919 |

|           |            |              |          |          |
|-----------|------------|--------------|----------|----------|
| XPNPEP2   | Xq26. 1    | -0.242510981 | 0.001072 | 0.003931 |
| GLIPR1L2  | 12q21. 2   | -0.242506225 | 0.001073 | 0.003931 |
| KCNH2     | 7q36. 1    | -0.242493671 | 0.001073 | 0.003933 |
| LNPEP     | 5q15       | -0.242481116 | 0.001074 | 0.003934 |
| THEMIS    | 6q22. 33   | -0.242403699 | 0.001078 | 0.003949 |
| WDR81     | 17p13. 3   | -0.242397422 | 0.001078 | 0.003949 |
| EVA1B     | 1p34. 3    | 0.242391145  | 0.001079 | 0.00395  |
| ADTRP     | 6p24. 1    | 0.242340929  | 0.001081 | 0.003958 |
| RNF103    | 2p11. 2    | 0.242340929  | 0.001081 | 0.003958 |
| ST3GAL3   | 1p34. 1    | -0.242322097 | 0.001082 | 0.003961 |
| ZNF860    | 3p23-p22.  | 0.242276066  | 0.001085 | 0.003969 |
| C10ORF53  | 10q11. 23  | -0.242252112 | 0.001086 | 0.003973 |
| RAMP2     | 17q21. 2   | -0.242232126 | 0.001087 | 0.003976 |
| NUSAP1    | 15q15. 1   | 0.242219572  | 0.001088 | 0.003978 |
| C7ORF26   | 7p22. 1    | -0.242167263 | 0.001091 | 0.003987 |
| TREM1     | 6p21. 1    | 0.242146466  | 0.001092 | 0.003991 |
| TMEM43    | 3p25. 1    | 0.242142155  | 0.001092 | 0.003991 |
| FMR1      | Xq27. 3    | -0.242125416 | 0.001093 | 0.003993 |
| IPP       | 1p34. 1    | -0.242117046 | 0.001093 | 0.003994 |
| TAF1L     | 9p21. 1    | -0.242117046 | 0.001093 | 0.003994 |
| FAM217B   | 20q13. 33  | -0.242108677 | 0.001094 | 0.003994 |
| RADIL     | 7p22. 1    | -0.242083569 | 0.001095 | 0.003999 |
| P4HA1     | 10q22. 1   | 0.242077292  | 0.001095 | 0.003999 |
| HIKESHI   | 11q14. 2   | 0.242054276  | 0.001097 | 0.004003 |
| SLFN11    | 17q12      | -0.242029167 | 0.001098 | 0.004007 |
| IFNA1     | 9p21. 3    | 0.241999205  | 0.0011   | 0.004012 |
| COMMD7    | 20q11. 21  | 0.241985228  | 0.0011   | 0.004014 |
| SGPP1     | 14q23. 2   | -0.241978951 | 0.001101 | 0.004015 |
| CHD8      | 14q11. 2   | -0.241968489 | 0.001101 | 0.004016 |
| KLHL38    | 8q24. 13   | -0.241946764 | 0.001103 | 0.00402  |
| NUMB      | 14q24. 2-c | 0.241939196  | 0.001103 | 0.00402  |
| SLC45A4   | 8q24. 3    | 0.241897349  | 0.001105 | 0.004028 |
| IL18RAP   | 2q12. 1    | -0.241876425 | 0.001106 | 0.004031 |
| GMCL1     | 2p13. 3    | -0.241874333 | 0.001106 | 0.004031 |
| DCBLD2    | 3q12. 1 3  | 0.241861779  | 0.001107 | 0.004033 |
| DAZAP1    | 19p13. 3   | 0.241857594  | 0.001107 | 0.004033 |
| ZNF252P   | 8q24. 3    | -0.241840855 | 0.001108 | 0.004036 |
| PPME1     | 11q13. 4   | 0.241836671  | 0.001108 | 0.004036 |
| SMARCAL1  | 2q35       | 0.241794824  | 0.001111 | 0.004043 |
| ZNF365    | 10q21. 2   | 0.241765531  | 0.001112 | 0.004048 |
| SNED1     | 2q37. 3    | -0.241763438 | 0.001112 | 0.004048 |
| LOC143666 | 11p15. 5   | 0.241723683  | 0.001115 | 0.004054 |
| PTGS2     | 1q31. 1    | 0.241723683  | 0.001115 | 0.004054 |
| MYH7      | 14q11. 2   | -0.241720684 | 0.001115 | 0.004054 |
| TNNI3     | 19q13. 42  | 0.241717692  | 0.001115 | 0.004054 |
| OR2C1     | 16p13. 3   | -0.241707291 | 0.001116 | 0.004055 |
| ZNF165    | 6p22. 1    | 0.241686021  | 0.001117 | 0.004059 |
| WDR63     | 1p22. 3    | -0.241677936 | 0.001117 | 0.00406  |
| CYSLTR2   | 13q14. 2   | -0.241644174 | 0.001119 | 0.004066 |
| LCP1      | 13q14. 13  | -0.241581403 | 0.001122 | 0.004078 |
| TNFSF13   | 17p13. 1   | 0.241539556  | 0.001125 | 0.004085 |
| TPD52L2   | 20q13. 33  | 0.241529094  | 0.001125 | 0.004086 |
| KIAA1143  | 3p21. 31   | -0.241522817 | 0.001126 | 0.004087 |
| WDR92     | 2p14       | -0.241485281 | 0.001128 | 0.004094 |

|            |           |              |          |          |
|------------|-----------|--------------|----------|----------|
| CCDC33     | 15q24.1   | 0.241468438  | 0.001129 | 0.004096 |
| CTIF       | 18q21.1   | -0.241426569 | 0.001131 | 0.004104 |
| PCBP1      | 2p13.3    | 0.241424476  | 0.001131 | 0.004104 |
| FAAH       | 1p33      | 0.24140146   | 0.001132 | 0.004108 |
| KCNAB1     | 3q25.31   | -0.241386814 | 0.001133 | 0.004111 |
| SPEN       | 1p36.21-f | -0.24137426  | 0.001134 | 0.004112 |
| C14ORF18C  | 14q32.33  | -0.241339158 | 0.001136 | 0.004118 |
| ALG1L2     | 3q22.1    | 0.241322076  | 0.001137 | 0.00412  |
| IBTK       | 6q14.1    | -0.241319859 | 0.001137 | 0.00412  |
| ZNF674-AS1 | Xp11.3    | -0.241311489 | 0.001137 | 0.004121 |
| HMGCS1     | 5p12      | 0.241271734  | 0.00114  | 0.004129 |
| PTBP1      | 19p13.3   | 0.241263365  | 0.00114  | 0.004129 |
| AP3B2      | 15q25.2   | -0.241205951 | 0.001143 | 0.00414  |
| TMEM9B     | 11p15.4   | 0.241202687  | 0.001143 | 0.00414  |
| FMNL3      | 12q13.12  | -0.24118804  | 0.001144 | 0.004142 |
| RELCH      | 18q21.33  | -0.241171301 | 0.001145 | 0.004145 |
| ZFP92      | Xq28      | -0.241169079 | 0.001145 | 0.004145 |
| RAB5C      | 17q21.2   | 0.241137824  | 0.001147 | 0.00415  |
| HAUS1      | 18q21.1   | -0.241110623 | 0.001149 | 0.004155 |
| FOXO3B     | 17p11.2   | -0.241104346 | 0.001149 | 0.004156 |
| CENPS      | 1p36.22   | -0.241098069 | 0.001149 | 0.004156 |
| LY6E-DT    | 8q24.3    | 0.241021953  | 0.001154 | 0.004171 |
| WNT4       | 1p36.12   | -0.240993451 | 0.001155 | 0.004176 |
| CLN3       | 16p12.1   | 0.240955789  | 0.001157 | 0.004183 |
| SOD3       | 4p15.2    | -0.24090348  | 0.00116  | 0.004193 |
| RFX2       | 19p13.3   | -0.240805139 | 0.001166 | 0.004212 |
| XAB2       | 19p13.2   | 0.240773753  | 0.001168 | 0.004218 |
| CLRN2      | 4p15.32   | -0.240742507 | 0.001169 | 0.004224 |
| ARSJ       | 4q26      | -0.240731906 | 0.00117  | 0.004225 |
| ZNF778     | 16q24.3   | -0.240706798 | 0.001171 | 0.00423  |
| ABHD6      | 3p14.3    | -0.240635658 | 0.001176 | 0.004243 |
| BCHE       | 3q26.1    | -0.240629381 | 0.001176 | 0.004244 |
| ZNF616     | 19q13.41  | -0.240587534 | 0.001178 | 0.004252 |
| AEN        | 15q26.1   | -0.24053941  | 0.001181 | 0.004261 |
| GPR137C    | 14q22.1   | -0.240526855 | 0.001182 | 0.004263 |
| NALCN      | 13q32.3-c | -0.240522671 | 0.001182 | 0.004263 |
| TPI1P2     | 7q32.1    | -0.240499655 | 0.001183 | 0.004267 |
| PPP2R2B    | 5q32      | -0.240482916 | 0.001184 | 0.00427  |
| CLTRN      | Xp22.2    | -0.240451656 | 0.001186 | 0.004276 |
| APEX2      | Xp11.21   | 0.240445253  | 0.001187 | 0.004276 |
| IGSF8      | 1q23.2    | 0.240399222  | 0.001189 | 0.004285 |
| LINC00341  | 14q32.13  | -0.240384575 | 0.00119  | 0.004287 |
| TIMM17B    | Xp11.23   | 0.24038039   | 0.00119  | 0.004287 |
| CREBBP     | 16p13.3   | -0.24035319  | 0.001192 | 0.004292 |
| AMZ2P1     | 17q24.1   | -0.24034482  | 0.001192 | 0.004293 |
| PSMD7      | 16q23.1   | 0.240307158  | 0.001195 | 0.0043   |
| FANCI      | 15q26.1   | 0.240271588  | 0.001197 | 0.004307 |
| PCDHGA6    | 5q31.3    | -0.240250664 | 0.001198 | 0.004311 |
| GALNT3     | 2q24.3    | 0.240204632  | 0.001201 | 0.00432  |
| SMIM19     | 8p11.21   | 0.240181617  | 0.001202 | 0.004324 |
| THOC7      | 3p14.1    | 0.240129308  | 0.001205 | 0.004334 |
| ZNF213     | 16p13.3   | 0.240091645  | 0.001207 | 0.004341 |
| ITGA8      | 10p13     | -0.240083778 | 0.001208 | 0.004342 |
| RBL1       | 20q11.23  | -0.240043521 | 0.00121  | 0.00435  |

|         |            |               |           |           |
|---------|------------|---------------|-----------|-----------|
| CEP76   | 18p11. 21  | -0. 240018413 | 0. 001211 | 0. 004354 |
| HAUS8   | 19p13. 11  | 0. 240012136  | 0. 001212 | 0. 004355 |
| BUB1B   | 15q15. 1   | 0. 239995397  | 0. 001213 | 0. 004357 |
| TMED2   | 12q24. 31  | -0. 23998912  | 0. 001213 | 0. 004358 |
| ABAT    | 16p13. 2   | -0. 239966104 | 0. 001215 | 0. 004362 |
| RNF167  | 17p13. 2   | -0. 239947273 | 0. 001216 | 0. 004365 |
| YIF1A   | 11q13. 2   | 0. 239905425  | 0. 001218 | 0. 004373 |
| KCNMB2  | 3q26. 32   | -0. 239894964 | 0. 001219 | 0. 004375 |
| PCDHB4  | 5q31. 3    | -0. 239863578 | 0. 001221 | 0. 004381 |
| PLEKHG5 | 1p36. 31   | 0. 239855209  | 0. 001221 | 0. 004382 |
| HPD     | 12q24. 31  | -0. 23983658  | 0. 001222 | 0. 004385 |
| GPR174  | Xq21. 1    | -0. 239822479 | 0. 001223 | 0. 004387 |
| ZNF417  | 19q13. 43  | -0. 239817547 | 0. 001223 | 0. 004387 |
| XPR1    | 1q25. 3    | -0. 239804992 | 0. 001224 | 0. 004389 |
| POLR2M  | 15q21. 3   | -0. 23976733  | 0. 001226 | 0. 004397 |
| SLC25A2 | 5q31. 3    | 0. 239742247  | 0. 001228 | 0. 004401 |
| AFF2    | Xq28       | -0. 239721298 | 0. 001229 | 0. 004405 |
| MRPS30  | 5p12       | 0. 239719206  | 0. 001229 | 0. 004405 |
| TUBA3FP | 22q11. 21  | -0. 239715523 | 0. 001229 | 0. 004405 |
| WNK4    | 17q21. 2   | -0. 239679451 | 0. 001232 | 0. 004411 |
| SLC35A3 | 1p21. 2    | 0. 239666897  | 0. 001232 | 0. 004413 |
| DNALI1  | 1p34. 3    | -0. 239639696 | 0. 001234 | 0. 004418 |
| FASLG   | 1q24. 3    | -0. 239633419 | 0. 001234 | 0. 004419 |
| GFI1    | 1p22. 1    | -0. 239614588 | 0. 001235 | 0. 004422 |
| MYO1E   | 15q22. 2   | 0. 239593664  | 0. 001237 | 0. 004426 |
| FBXO34  | 14q22. 3   | 0. 239532986  | 0. 00124  | 0. 004438 |
| WASHC4  | 12q23. 3   | -0. 239505785 | 0. 001242 | 0. 004443 |
| ATP2A3  | 17p13. 2   | -0. 239472308 | 0. 001244 | 0. 00445  |
| TFAP2E  | 1p34. 3    | 0. 239466156  | 0. 001244 | 0. 00445  |
| LEPR    | 1p31. 3    | -0. 239440922 | 0. 001246 | 0. 004455 |
| ROR1    | 1p31. 3    | -0. 239415814 | 0. 001247 | 0. 00446  |
| TMEM165 | 4q12       | 0. 239392798  | 0. 001249 | 0. 004462 |
| PACS1   | 11q13. 1-c | 0. 239390706  | 0. 001249 | 0. 004462 |
| CR1L    | 1q32. 2    | -0. 239390428 | 0. 001249 | 0. 004462 |
| AFMID   | 17q25. 3   | 0. 239386521  | 0. 001249 | 0. 004462 |
| SMC2    | 9q31. 1    | -0. 239386521 | 0. 001249 | 0. 004462 |
| PLEKHJ1 | 19p13. 3   | 0. 239382336  | 0. 001249 | 0. 004462 |
| USP34   | 2p15       | -0. 239302827 | 0. 001254 | 0. 004478 |
| NOB1    | 16q22. 1   | 0. 239292365  | 0. 001255 | 0. 00448  |
| ACTL10  | 20q11. 22  | 0. 239273534  | 0. 001256 | 0. 004483 |
| RBPM5   | 8p12       | 0. 239242148  | 0. 001258 | 0. 004489 |
| CCDC186 | 10q25. 3   | -0. 239221225 | 0. 001259 | 0. 004493 |
| SRP72   | 4q12       | -0. 239212855 | 0. 00126  | 0. 004494 |
| CPSF3   | 2p25. 1    | 0. 239135438  | 0. 001265 | 0. 00451  |
| PPIL6   | 6q21       | -0. 239123009 | 0. 001265 | 0. 004512 |
| KCNH7   | 2q24. 2    | -0. 239095743 | 0. 001267 | 0. 004517 |
| TERF1   | 8q21. 11   | -0. 239078945 | 0. 001268 | 0. 00452  |
| AKR1C2  | 10p15. 1   | 0. 239062206  | 0. 001269 | 0. 004523 |
| TAB2    | 6q25. 1    | -0. 238809031 | 0. 001285 | 0. 004578 |
| SIAH3   | 13q14. 13  | -0. 23879324  | 0. 001286 | 0. 004581 |
| UQCC3   | 11q12. 3   | 0. 23873789   | 0. 001289 | 0. 004592 |
| PPIAL4C | 1q21. 2    | 0. 238721152  | 0. 00129  | 0. 004595 |
| DDX31   | 9q34. 13   | -0. 238679305 | 0. 001293 | 0. 004603 |
| PLK3    | 1p34. 1    | 0. 238662566  | 0. 001294 | 0. 004606 |



|           |           |              |          |          |
|-----------|-----------|--------------|----------|----------|
| EPPIN     | 20q13.12  | 0.238616378  | 0.001297 | 0.004616 |
| TMEM158   | 3p21.31   | 0.238608164  | 0.001297 | 0.004617 |
| KDELR2    | 7p22.1    | 0.238541209  | 0.001301 | 0.004631 |
| GDE1      | 16p12.3   | 0.238486808  | 0.001305 | 0.004642 |
| TIMM8B    | 11q23.1   | 0.23840939   | 0.00131  | 0.004659 |
| VAV3      | 1p13.3    | -0.23837382  | 0.001312 | 0.004666 |
| RBBP9     | 20p11.23  | -0.238369636 | 0.001312 | 0.004666 |
| SLC16A8   | 22q13.1   | 0.238340343  | 0.001314 | 0.004672 |
| MRPL17    | 11p15.4   | 0.238308957  | 0.001316 | 0.004678 |
| RAB3B     | 1p32.3    | -0.238298496 | 0.001317 | 0.00468  |
| ZNF41     | Xp11.3    | -0.238254556 | 0.00132  | 0.004689 |
| BEX1      | Xq22.1 Xc | -0.238229448 | 0.001321 | 0.004694 |
| WDR5      | 9q34.2    | -0.23819597  | 0.001323 | 0.004701 |
| TDG       | 12q23.3   | -0.238189693 | 0.001324 | 0.004701 |
| PDS5B     | 13q13.1   | -0.2381604   | 0.001326 | 0.004707 |
| FCMR      | 1q32.1    | -0.238076706 | 0.001331 | 0.004725 |
| RERE      | 1p36.23   | -0.238064152 | 0.001332 | 0.004727 |
| MELK      | 9p13.2    | 0.238032766  | 0.001334 | 0.004734 |
| NUP210    | 3p25.1    | -0.238020212 | 0.001335 | 0.004736 |
| MICU1     | 10q22.1   | 0.238003473  | 0.001336 | 0.004739 |
| NKX2-2    | 20p11.22  | -0.237998415 | 0.001336 | 0.004739 |
| KDM6A     | Xp11.3    | -0.237944887 | 0.00134  | 0.00475  |
| ARG1      | 6q23.2    | -0.237944243 | 0.00134  | 0.00475  |
| MFAP2     | 1p36.13   | 0.237936518  | 0.00134  | 0.004751 |
| MBNL1-AS1 | 13q25.1   | -0.237896763 | 0.001343 | 0.004759 |
| USH2A     | 1q41      | -0.237852948 | 0.001345 | 0.004768 |
| HTR3C     | 3q27.1    | 0.237806599  | 0.001348 | 0.004778 |
| EID2      | 19q13.2   | -0.237781684 | 0.00135  | 0.004783 |
| NAP1L6    | Xq13.2    | -0.237712631 | 0.001355 | 0.004798 |
| CDKL5     | Xp22.13   | -0.237667101 | 0.001358 | 0.004808 |
| PHLPP1    | 18q21.33  | -0.237643588 | 0.001359 | 0.004812 |
| KLHDC3    | 6p21.1    | -0.237639403 | 0.001359 | 0.004812 |
| SEC14L5   | 16p13.3   | -0.237616387 | 0.001361 | 0.004817 |
| TBC1D2B   | 15q24.3-c | -0.23761011  | 0.001361 | 0.004817 |
| GTF2H3    | 12q24.31  | -0.237578725 | 0.001363 | 0.004824 |
| COX5B     | 2q11.2    | 0.237566171  | 0.001364 | 0.004826 |
| SLC18A2   | 10q25.3   | -0.237561986 | 0.001364 | 0.004826 |
| SNRPN     | 15q11.2   | -0.237551524 | 0.001365 | 0.004828 |
| C20RF27A  | 2q21.2    | 0.237534785  | 0.001366 | 0.00483  |
| PRR34     | 22q13.31  | -0.237534785 | 0.001366 | 0.00483  |
| LYST      | 1q42.3    | -0.237524324 | 0.001367 | 0.00483  |
| XPO5      | 6p21.1    | -0.237524324 | 0.001367 | 0.00483  |
| SLC22A14  | 3p22.2    | 0.23752079   | 0.001367 | 0.00483  |
| GAB1      | 4q31.21   | -0.237520139 | 0.001367 | 0.00483  |
| EOMES     | 3p24.1    | -0.237470118 | 0.001371 | 0.00484  |
| WRAP73    | 1p36.32   | 0.237469922  | 0.001371 | 0.00484  |
| ERC2      | 3p14.3    | -0.237415645 | 0.001374 | 0.004851 |
| EMC1      | 1p36.13   | -0.237413429 | 0.001374 | 0.004851 |
| HIC2      | 22q11.21  | -0.237405184 | 0.001375 | 0.004852 |
| SELP      | 1q24.2    | -0.23739669  | 0.001375 | 0.004853 |
| MAN2A1    | 5q21.3    | -0.237350658 | 0.001378 | 0.004863 |
| OGN       | 9q22.31   | -0.237338228 | 0.001379 | 0.004865 |
| LOC90784  | 2p11.2    | -0.237321365 | 0.00138  | 0.004868 |
| HYDIN     | 16q22.2   | -0.237300441 | 0.001382 | 0.004872 |

|           |           |               |           |           |
|-----------|-----------|---------------|-----------|-----------|
| PPP1CC    | 12q24. 11 | -0. 237298349 | 0. 001382 | 0. 004872 |
| ST8SIA6   | 10p12. 33 | -0. 23727136  | 0. 001384 | 0. 004878 |
| MYCBP     | 1p34. 3   | 0. 237243948  | 0. 001386 | 0. 004883 |
| ZNF71     | 19q13. 43 | -0. 237193731 | 0. 001389 | 0. 004893 |
| KIF22     | 16p11. 2  | 0. 237193731  | 0. 001389 | 0. 004893 |
| TBC1D32   | 6q22. 31  | -0. 23718327  | 0. 00139  | 0. 004895 |
| BCL3      | 19q13. 32 | 0. 237156069  | 0. 001391 | 0. 0049   |
| ZDHHC24   | 11q13. 2  | 0. 237143515  | 0. 001392 | 0. 004903 |
| E2F1      | 20q11. 22 | 0. 237133053  | 0. 001393 | 0. 004904 |
| TRAF3IP2  | 6q21      | -0. 237130961 | 0. 001393 | 0. 004904 |
| KNSTRN    | 15q15. 1  | 0. 237126776  | 0. 001393 | 0. 004904 |
| DHRS11    | 17q12     | 0. 237118406  | 0. 001394 | 0. 004905 |
| AURKB     | 17p13. 1  | 0. 237066098  | 0. 001397 | 0. 004916 |
| ALMS1     | 2p13. 1   | -0. 237051451 | 0. 001398 | 0. 004919 |
| COL6A4P2  | 3q22. 1   | 0. 23704567   | 0. 001399 | 0. 00492  |
| MAGED2    | Xp11. 21  | -0. 23702425  | 0. 0014   | 0. 004924 |
| MEX3C     | 18q21. 2  | -0. 237013789 | 0. 001401 | 0. 004925 |
| PDPR      | 16q22. 1  | -0. 237013789 | 0. 001401 | 0. 004925 |
| MIIP      | 1p36. 22  | 0. 236980311  | 0. 001403 | 0. 004932 |
| PLD5      | 1q43      | -0. 236872234 | 0. 001411 | 0. 004956 |
| KCTD20    | 6p21. 31  | -0. 236848492 | 0. 001412 | 0. 004961 |
| SLA2      | 20q11. 23 | -0. 236842215 | 0. 001413 | 0. 004962 |
| KLHL14    | 18q12. 1  | -0. 23682604  | 0. 001414 | 0. 004965 |
| TRAIP     | 3p21. 31  | 0. 236823384  | 0. 001414 | 0. 004965 |
| METAP1    | 4q23      | 0. 236771075  | 0. 001417 | 0. 004976 |
| POM121C   | 7q11. 23  | -0. 236750152 | 0. 001419 | 0. 00498  |
| DAB2      | 5p13. 1   | -0. 236708305 | 0. 001422 | 0. 004989 |
| FAM111B   | 11q12. 1  | 0. 236643442  | 0. 001426 | 0. 005004 |
| GPI       | 19q13. 11 | 0. 236586948  | 0. 00143  | 0. 005017 |
| LIN37     | 19q13. 12 | 0. 236580671  | 0. 00143  | 0. 005017 |
| JPT2      | 16p13. 3  | 0. 23655347   | 0. 001432 | 0. 005023 |
| DSG2      | 18q12. 1  | 0. 236540916  | 0. 001433 | 0. 005025 |
| SMCHD1    | 18p11. 32 | -0. 236496977 | 0. 001436 | 0. 005035 |
| PDE5A     | 4q26      | -0. 236494884 | 0. 001436 | 0. 005035 |
| LTBR      | 12p13. 31 | 0. 236459314  | 0. 001439 | 0. 005042 |
| ANKS3     | 16p13. 3  | 0. 236404913  | 0. 001443 | 0. 005055 |
| HIST1H2AC | 6p22. 1   | 0. 236391341  | 0. 001443 | 0. 005057 |
| FAM183A   | 1p34. 2   | -0. 236382695 | 0. 001444 | 0. 005058 |
| ADGRL2    | 1p31. 1   | -0. 236350512 | 0. 001446 | 0. 005065 |
| SSRP1     | 11q12. 1  | 0. 236300295  | 0. 00145  | 0. 005076 |
| IFI44L    | 1p31. 1   | 0. 236289833  | 0. 00145  | 0. 005078 |
| PART1     | 5q12. 1   | -0. 236272998 | 0. 001452 | 0. 005081 |
| DSEL      | 18q22. 1  | -0. 23626891  | 0. 001452 | 0. 005081 |
| LIMA1     | 12q13. 12 | 0. 236208231  | 0. 001456 | 0. 005095 |
| MPHOSPH8  | 13q12. 11 | -0. 236160107 | 0. 00146  | 0. 005106 |
| ZNF862    | 7q36. 1   | -0. 236124537 | 0. 001462 | 0. 005114 |
| SNRPD3    | 22q11. 23 | 0. 236111983  | 0. 001463 | 0. 005116 |
| OAS3      | 12q24. 13 | 0. 236091059  | 0. 001464 | 0. 005119 |
| HPS1      | 10q24. 2  | 0. 236091059  | 0. 001464 | 0. 005119 |
| SLC6A13   | 12p13. 33 | -0. 236088999 | 0. 001465 | 0. 005119 |
| GNA14     | 9q21. 2   | -0. 236078505 | 0. 001465 | 0. 005121 |
| SENP8     | 15q23     | -0. 236053397 | 0. 001467 | 0. 005126 |
| LRRN3     | 7q31. 1   | -0. 236007365 | 0. 00147  | 0. 005136 |
| BAG3      | 10q26. 11 | 0. 235990626  | 0. 001471 | 0. 00514  |

|           |           |              |          |          |
|-----------|-----------|--------------|----------|----------|
| CRTC3     | 15q26.1   | -0.235959241 | 0.001474 | 0.005146 |
| CENPX     | 17q25.3   | 0.235959241  | 0.001474 | 0.005146 |
| FAM234A   | 16p13.3   | 0.235881824  | 0.001479 | 0.005164 |
| PTPRQ     | 12q21.31  | -0.235870264 | 0.00148  | 0.005166 |
| ADAMTS7   | 15q25.1   | 0.235812776  | 0.001484 | 0.005179 |
| SLC25A52  | 18q12.1   | -0.235792099 | 0.001485 | 0.005183 |
| SRF       | 6p21.1    | -0.235672588 | 0.001494 | 0.005212 |
| KCNG2     | 18q23     | -0.235667919 | 0.001494 | 0.005212 |
| C2ORF68   | 2p11.2    | 0.235660034  | 0.001495 | 0.005213 |
| MYT1L-AS1 | 12p25.3   | -0.235628966 | 0.001497 | 0.00522  |
| TMED5     | 1p22.1    | -0.235622371 | 0.001498 | 0.005221 |
| RRNAD1    | 1q23.1    | 0.235599356  | 0.001499 | 0.005226 |
| MTFR1L    | 1p36.11   | -0.235595171 | 0.0015   | 0.005226 |
| RORB      | 9q21.13   | -0.235583786 | 0.0015   | 0.005228 |
| SYT6      | 1p13.2    | -0.23557183  | 0.001501 | 0.00523  |
| OR4N2     | 14q11.2   | -0.235536108 | 0.001504 | 0.005238 |
| STK40     | 1p34.3    | -0.2355052   | 0.001506 | 0.005245 |
| TMEM242   | 6q25.3    | -0.235498922 | 0.001506 | 0.005245 |
| PIR       | Xp22.2    | -0.235454983 | 0.00151  | 0.005256 |
| POR       | 7q11.23   | 0.235448706  | 0.00151  | 0.005256 |
| DCAF4L2   | 8q21.3    | -0.235446183 | 0.00151  | 0.005256 |
| PRUNE1    | 1q21.3    | -0.235427782 | 0.001512 | 0.00526  |
| ARHGEF9   | Xq11.1    | -0.235404766 | 0.001513 | 0.005265 |
| IL1RL1    | 2q12.1    | -0.23534618  | 0.001517 | 0.005278 |
| ZNF581    | 19q13.42  | 0.235333626  | 0.001518 | 0.00528  |
| UCP1      | 4q31.1    | -0.235331271 | 0.001519 | 0.00528  |
| CACNA1C   | 12p13.33  | -0.235323164 | 0.001519 | 0.005281 |
| BICD2     | 9q22.31   | -0.235321072 | 0.001519 | 0.005281 |
| CLEC4D    | 12p13.31  | -0.235318088 | 0.001519 | 0.005281 |
| ATPAF1    | 1p33      | -0.235293871 | 0.001521 | 0.005286 |
| IL37      | 2q14.1    | 0.235276929  | 0.001522 | 0.005289 |
| KIF3C     | 2p23.3    | -0.235241563 | 0.001525 | 0.005297 |
| ABC4      | 7q21.12   | -0.235218547 | 0.001527 | 0.005301 |
| LGALS9C   | 17p11.2   | 0.235218547  | 0.001527 | 0.005301 |
| CLEC9A    | 12p13.2   | -0.235183399 | 0.001529 | 0.005309 |
| GLRA3     | 4q34.1    | -0.235158945 | 0.001531 | 0.005315 |
| CENPU     | 4q35.1    | 0.235147407  | 0.001532 | 0.005317 |
| TMEM150B  | 19q13.42  | 0.235107652  | 0.001535 | 0.005324 |
| CDK10     | 16q24.3   | 0.235105559  | 0.001535 | 0.005324 |
| BLOC1S4   | 4p16.1    | 0.235105559  | 0.001535 | 0.005324 |
| ZNF506    | 19p13.11  | -0.235049066 | 0.001539 | 0.005338 |
| ACD       | 16q22.1   | 0.235038604  | 0.00154  | 0.00534  |
| AFF4      | 5q31.1    | -0.23502605  | 0.001541 | 0.005342 |
| HSDL2     | 9q32      | -0.235009311 | 0.001542 | 0.005345 |
| PMVK      | 1q21.3    | 0.234996757  | 0.001543 | 0.005348 |
| DECR2     | 16p13.3   | 0.234992572  | 0.001543 | 0.005348 |
| EEF1AKMT1 | 113q12.11 | -0.234971649 | 0.001545 | 0.005352 |
| THUMPDI   | 16p12.3   | -0.234904693 | 0.00155  | 0.005368 |
| SAP18     | 13q12.11  | 0.234887954  | 0.001551 | 0.005372 |
| PRRG1     | Xp21.1    | 0.2348754    | 0.001552 | 0.005374 |
| LGALS7    | 19q13.2   | 0.234848562  | 0.001554 | 0.005379 |
| TMEM183A  | 1q32.1    | 0.2348482    | 0.001554 | 0.005379 |
| TMEM132D  | 12q24.33  | -0.234745763 | 0.001562 | 0.005404 |
| EBPL      | 13q14.2   | 0.234741489  | 0.001562 | 0.005405 |

|           |           |               |           |           |
|-----------|-----------|---------------|-----------|-----------|
| SMOC1     | 14q24. 2  | -0. 23472475  | 0. 001563 | 0. 005408 |
| FAM72B    | 1p11. 2   | 0. 234703827  | 0. 001565 | 0. 005412 |
| CDK16     | Xp11. 3   | 0. 234701735  | 0. 001565 | 0. 005412 |
| EMC3      | 3p25. 3   | 0. 234651518  | 0. 001569 | 0. 005424 |
| NCBP1     | 9q22. 33  | -0. 234613856 | 0. 001571 | 0. 005433 |
| CAMSAP1   | 9q34. 3   | -0. 23455527  | 0. 001576 | 0. 005447 |
| ZBTB9     | 6p21. 32  | -0. 234538531 | 0. 001577 | 0. 005449 |
| TMEM67    | 8q22. 1   | -0. 234538531 | 0. 001577 | 0. 005449 |
| DGKE      | 17q22     | -0. 234505053 | 0. 00158  | 0. 005457 |
| GUSBP1    | 5p14. 3   | -0. 234500868 | 0. 00158  | 0. 005457 |
| DLD       | 7q31. 1   | -0. 234469483 | 0. 001582 | 0. 005465 |
| CNTNAP1   | 17q21. 2  | -0. 234450652 | 0. 001584 | 0. 005469 |
| VPS37C    | 11q12. 2  | 0. 23444019   | 0. 001584 | 0. 00547  |
| ZNF204P   | 6p22. 1   | -0. 234421359 | 0. 001586 | 0. 005474 |
| WWC3      | Xp22. 2   | -0. 23440462  | 0. 001587 | 0. 005478 |
| RTRAF     | 14q22. 1  | 0. 234358588  | 0. 001591 | 0. 005489 |
| SMAD5-AS1 | 15q31. 1  | -0. 234347203 | 0. 001591 | 0. 005491 |
| SH3BGR    | 21q22. 2  | -0. 23433348  | 0. 001592 | 0. 005493 |
| PTPRG     | 3p14. 2   | -0. 234320926 | 0. 001593 | 0. 005496 |
| KRT24     | 17q21. 2  | -0. 234299348 | 0. 001595 | 0. 0055   |
| STX1A     | 7q11. 23  | 0. 234247693  | 0. 001599 | 0. 005513 |
| FAM83B    | 6p12. 1   | 0. 234242641  | 0. 001599 | 0. 005513 |
| POLR2A    | 17p13. 1  | -0. 234235139 | 0. 0016   | 0. 005513 |
| RGS9      | 17q24. 1  | -0. 234233047 | 0. 0016   | 0. 005513 |
| XRCC3     | 14q32. 33 | 0. 234233047  | 0. 0016   | 0. 005513 |
| ZNF493    | 19p12     | -0. 234212123 | 0. 001602 | 0. 005518 |
| MED31     | 17p13. 1  | -0. 234207938 | 0. 001602 | 0. 005518 |
| PAG1      | 8q21. 13  | -0. 234180738 | 0. 001604 | 0. 005524 |
| VHL       | 3p25. 3   | -0. 234166091 | 0. 001605 | 0. 005527 |
| PPM1B     | 2p21      | -0. 234092859 | 0. 001611 | 0. 005545 |
| CUX1      | 7q22. 1   | 0. 234044735  | 0. 001614 | 0. 005557 |
| TSC1      | 9q34. 13  | -0. 23403218  | 0. 001615 | 0. 005559 |
| SNRPE     | 1q32. 1   | 0. 234002887  | 0. 001618 | 0. 005566 |
| KIAA0753  | 17p13. 1  | -0. 233986149 | 0. 001619 | 0. 005569 |
| KIF21B    | 1q32. 1   | -0. 2338899   | 0. 001626 | 0. 005594 |
| NTPCR     | 1q42. 2   | 0. 233831314  | 0. 001631 | 0. 005609 |
| BEX3      | Xq22. 2   | -0. 233724604 | 0. 001639 | 0. 005636 |
| ZNF619    | 3p22. 1   | -0. 233705773 | 0. 001641 | 0. 00564  |
| ATP2A2    | 12q24. 11 | -0. 233699496 | 0. 001641 | 0. 00564  |
| STOML1    | 15q24. 1  | 0. 233697403  | 0. 001641 | 0. 00564  |
| KLHL36    | 16q24. 1  | 0. 233645094  | 0. 001645 | 0. 005653 |
| ARHGEF39  | 9p13. 3   | 0. 233611617  | 0. 001648 | 0. 005661 |
| DCLK3     | 3p22. 2   | -0. 233544784 | 0. 001653 | 0. 005678 |
| LACTB2    | 8q13. 3   | 0. 233523738  | 0. 001655 | 0. 005683 |
| TSPAN17   | 5q35. 2   | 0. 233504907  | 0. 001656 | 0. 005687 |
| TIE1      | 1p34. 2   | -0. 233502814 | 0. 001656 | 0. 005687 |
| RAB2B     | 14q11. 2  | -0. 233496537 | 0. 001657 | 0. 005687 |
| LCAT      | 16q22. 1  | 0. 233483983  | 0. 001658 | 0. 00569  |
| ZNF768    | 16p11. 2  | 0. 233479798  | 0. 001658 | 0. 00569  |
| SPARCL1   | 4q22. 1   | -0. 233396104 | 0. 001665 | 0. 005712 |
| TMEM45B   | 11q24. 3  | 0. 233322872  | 0. 001671 | 0. 005731 |
| PIK3C2A   | 11p15. 1  | -0. 233251731 | 0. 001676 | 0. 005749 |
| ARL4D     | 17q21. 31 | 0. 233243362  | 0. 001677 | 0. 00575  |
| PCLO      | 7q21. 11  | -0. 233211977 | 0. 001679 | 0. 005758 |

|          |          |              |          |          |
|----------|----------|--------------|----------|----------|
| CHI3L2   | 1p13.2   | -0.233207792 | 0.00168  | 0.005758 |
| CYFIP1   | 15q11.2  | 0.233184776  | 0.001682 | 0.005763 |
| CDRT4    | 17p12    | -0.233182684 | 0.001682 | 0.005763 |
| CBWD5    | 9q21.11  | -0.233176572 | 0.001682 | 0.005763 |
| GLIDR    | 9p12     | -0.233174314 | 0.001682 | 0.005763 |
| CES4A    | 16q22.1  | -0.233117821 | 0.001687 | 0.005777 |
| TREML3P  | 6p21.1   | 0.233064347  | 0.001691 | 0.005791 |
| ARFGEF2  | 20q13.13 | -0.233050865 | 0.001692 | 0.005793 |
| DSE      | 6q22.1   | -0.233050865 | 0.001692 | 0.005793 |
| OARD1    | 6p21.1   | -0.233029942 | 0.001694 | 0.005798 |
| TAC3     | 12q13.3  | 0.23301176   | 0.001695 | 0.005802 |
| AVPR1B   | 1q32.1   | -0.232978883 | 0.001698 | 0.00581  |
| LDB3     | 10q23.2  | -0.23297554  | 0.001698 | 0.00581  |
| FAM155B  | Xq13.1   | -0.232971356 | 0.001699 | 0.00581  |
| DDX50    | 10q22.1  | -0.232942063 | 0.001701 | 0.005817 |
| PHC1     | 12p13.31 | -0.232887661 | 0.001705 | 0.005831 |
| NOL8     | 9q22.31  | -0.232862553 | 0.001707 | 0.005836 |
| CLEC14A  | 14q21.1  | -0.232860461 | 0.001708 | 0.005836 |
| SEPTIN3  | 22q13.2  | -0.232854184 | 0.001708 | 0.005837 |
| GPR107   | 9q34.11  | -0.232757935 | 0.001716 | 0.005863 |
| DLL1     | 6q27     | -0.232716088 | 0.001719 | 0.005873 |
| GRIA2    | 4q32.1   | -0.232714072 | 0.001719 | 0.005873 |
| KIF15    | 3p21.31  | 0.232701442  | 0.00172  | 0.005875 |
| KNOP1    | 16p12.3  | 0.232653317  | 0.001724 | 0.005888 |
| INSC     | 11p15.2  | 0.232605193  | 0.001728 | 0.0059   |
| ENPEP    | 4q25     | -0.232563346 | 0.001732 | 0.005911 |
| CDKN1B   | 12p13.1  | -0.23250476  | 0.001737 | 0.005926 |
| HIF1AN   | 10q24.31 | -0.232498483 | 0.001737 | 0.005927 |
| USP28    | 11q23.2  | -0.232462913 | 0.00174  | 0.005936 |
| PALD1    | 10q22.1  | -0.232343649 | 0.00175  | 0.005968 |
| FAM104B  | Xp11.21  | -0.232308079 | 0.001753 | 0.005977 |
| RAD23B   | 9q31.2   | -0.232297617 | 0.001754 | 0.005979 |
| PYCR2    | 1q42.12  | 0.232264139  | 0.001756 | 0.005987 |
| CHTF18   | 16p13.3  | 0.232259954  | 0.001757 | 0.005988 |
| MOSPD2   | Xp22.2   | -0.2322474   | 0.001758 | 0.00599  |
| MTRF1    | 13q14.11 | 0.232222292  | 0.00176  | 0.005996 |
| RAD9A    | 11q13.2  | 0.232209738  | 0.001761 | 0.005999 |
| GNL2     | 1p34.3   | 0.232201368  | 0.001762 | 0.006    |
| CHAMP1   | 13q34    | -0.232190907 | 0.001762 | 0.006002 |
| ALKBH1   | 14q24.3  | -0.23206955  | 0.001773 | 0.006035 |
| ECT2L    | 6q24.1   | -0.232020622 | 0.001777 | 0.006048 |
| SPART    | 13q13.3  | -0.232006779 | 0.001778 | 0.006051 |
| CENPA    | 2p23.3   | 0.231975394  | 0.00178  | 0.006059 |
| RIPOR1   | 16q22.1  | 0.231937731  | 0.001784 | 0.006068 |
| ANKRD13D | 11q13.2  | 0.231937731  | 0.001784 | 0.006068 |
| ART4     | 12p12.3  | -0.231924252 | 0.001785 | 0.006069 |
| MIS18BP1 | 14q21.2  | -0.231923085 | 0.001785 | 0.006069 |
| ADGRL3   | 4q13.1   | -0.231920993 | 0.001785 | 0.006069 |
| CNR1     | 6q15     | -0.231910531 | 0.001786 | 0.006071 |
| CC2D2A   | 4p15.32  | -0.23188333  | 0.001788 | 0.006078 |
| CHN1     | 2q31.1   | -0.231820559 | 0.001793 | 0.006095 |
| FAM81B   | 5q15     | 0.231762306  | 0.001798 | 0.006111 |
| SYT4     | 18q12.3  | -0.231739016 | 0.0018   | 0.006116 |
| AKAP12   | 6q25.1   | -0.231732681 | 0.001801 | 0.006117 |

|           |           |              |          |          |
|-----------|-----------|--------------|----------|----------|
| SNX3      | 6q21      | -0.231724311 | 0.001802 | 0.006119 |
| ZBTB80S   | 1p35.1    | 0.231699203  | 0.001804 | 0.006125 |
| GTPBP3    | 19p13.11  | 0.231686649  | 0.001805 | 0.006127 |
| ABCC2     | 10q24.2   | -0.231672002 | 0.001806 | 0.00613  |
| SNRPB     | 20p13     | 0.23166991   | 0.001806 | 0.00613  |
| KANSL2    | 12q13.11  | -0.231657356 | 0.001807 | 0.006133 |
| HECA      | 6q24.1    | -0.231644802 | 0.001808 | 0.006135 |
| TRIO      | 5p15.2    | -0.231642709 | 0.001808 | 0.006135 |
| XIAP      | Xq25      | -0.231632247 | 0.001809 | 0.006137 |
| HMGB1P1   | 20q13.31  | 0.231613416  | 0.001811 | 0.006141 |
| KCTD18    | 2q33.1    | -0.231567384 | 0.001815 | 0.006153 |
| SLC38A2   | 12q13.11  | -0.231548553 | 0.001817 | 0.006158 |
| AKAP1     | 17q22     | 0.231533907  | 0.001818 | 0.006161 |
| NOCT      | 4q31.1    | -0.231506706 | 0.00182  | 0.006168 |
| KCTD9     | 8p21.2    | 0.23149206   | 0.001821 | 0.006171 |
| IRF6      | 1q32.2    | 0.23148369   | 0.001822 | 0.006172 |
| CFAP46    | 10q26.3   | -0.231476748 | 0.001823 | 0.006173 |
| DPYS      | 8q22.3    | -0.231421725 | 0.001827 | 0.006186 |
| KCMF1     | 2p11.2    | 0.231420919  | 0.001827 | 0.006186 |
| TPP1      | 11p15.4   | -0.231420919 | 0.001827 | 0.006186 |
| CTSA      | 20q13.12  | 0.231393719  | 0.00183  | 0.006193 |
| KCNE3     | 11q13.4   | 0.231391626  | 0.00183  | 0.006193 |
| AADAC     | 3q25.1    | 0.231341894  | 0.001834 | 0.006206 |
| ARHGAP45  | 19p13.3   | 0.231312117  | 0.001837 | 0.006214 |
| MRPL44    | 2q36.1    | 0.23130584   | 0.001837 | 0.006215 |
| GRB10     | 7p12.1    | -0.231287009 | 0.001839 | 0.006219 |
| DYRK2     | 12q15     | -0.23127027  | 0.00184  | 0.006223 |
| ZNF833P   | 19p13.2   | -0.231263067 | 0.001841 | 0.006223 |
| RNF11     | 1p32.3    | -0.2312619   | 0.001841 | 0.006223 |
| MCC       | 5q22.2    | -0.2312347   | 0.001843 | 0.00623  |
| CA10      | 17q21.33- | -0.231193765 | 0.001847 | 0.006241 |
| LZTS3     | 20p13     | 0.23119076   | 0.001847 | 0.006241 |
| RBBP5     | 1q32.1    | -0.231134267 | 0.001852 | 0.006256 |
| CASS4     | 20q13.31  | -0.231121712 | 0.001853 | 0.006259 |
| IGFL4     | 19q13.32  | -0.231077722 | 0.001857 | 0.006271 |
| HOXC6     | 12q13.13  | 0.231052665  | 0.001859 | 0.006277 |
| DERL2     | 17p13.2   | -0.231025464 | 0.001862 | 0.006284 |
| LINC01588 | 14q21.3   | 0.231005024  | 0.001863 | 0.006289 |
| NDUFS2    | 1q23.3    | 0.230973155  | 0.001866 | 0.006298 |
| LAMB1     | 7q31.1    | -0.230952231 | 0.001868 | 0.006303 |
| MMP9      | 20q13.12  | 0.23094177   | 0.001869 | 0.006305 |
| PCM1      | 8p22      | -0.230866445 | 0.001876 | 0.006326 |
| POP7      | 7q22.1    | 0.23086226   | 0.001876 | 0.006326 |
| RFC4      | 3q27.3    | 0.230858075  | 0.001876 | 0.006326 |
| EFNB3     | 17p13.1   | -0.230855983 | 0.001877 | 0.006326 |
| SERTM1    | 13q13.3   | -0.230849551 | 0.001877 | 0.006326 |
| PTGS1     | 9q33.2    | -0.230847614 | 0.001877 | 0.006326 |
| SLC38A11  | 2q24.3    | -0.230838319 | 0.001878 | 0.006327 |
| SHH       | 7q36.3    | 0.230837635  | 0.001878 | 0.006327 |
| HELLS     | 10q23.33  | 0.230832967  | 0.001879 | 0.006327 |
| BARX1     | 9q22.32   | 0.230816271  | 0.00188  | 0.006331 |
| SLC24A3   | 20p11.23  | -0.230809951 | 0.001881 | 0.006332 |
| NUP93     | 16q13     | 0.230789028  | 0.001882 | 0.006337 |
| AMOT      | Xq23      | -0.230780658 | 0.001883 | 0.006339 |

|           |           |               |           |           |
|-----------|-----------|---------------|-----------|-----------|
| SBK2      | 19q13. 42 | -0. 230759022 | 0. 001885 | 0. 006344 |
| ALOX12P2  | 17p13. 1  | 0. 230749394  | 0. 001886 | 0. 006346 |
| RAD17     | 5q13. 2   | -0. 230728349 | 0. 001888 | 0. 006351 |
| RPL36A    | Xq22. 1   | 0. 230701149  | 0. 00189  | 0. 006358 |
| SWAP70    | 11p15. 4  | -0. 230686502 | 0. 001891 | 0. 006361 |
| EFCAB2    | 1q44      | -0. 230680225 | 0. 001892 | 0. 006362 |
| HMG5      | Xq21. 1   | -0. 230667671 | 0. 001893 | 0. 006365 |
| ERAL1     | 17q11. 2  | 0. 2305777    | 0. 001901 | 0. 00639  |
| CHKB      | 22q13. 33 | 0. 230571423  | 0. 001902 | 0. 006391 |
| SLITRK1   | 13q31. 1  | -0. 230564575 | 0. 001902 | 0. 006392 |
| PTPMT1    | 11p11. 2  | 0. 230529575  | 0. 001905 | 0. 006402 |
| IVL       | 1q21. 3   | 0. 230511586  | 0. 001907 | 0. 006406 |
| SLC7A7    | 14q11. 2  | 0. 230483544  | 0. 00191  | 0. 006413 |
| PLA2G15   | 16q22. 1  | 0. 230454251  | 0. 001912 | 0. 006421 |
| FNIP1     | 5q31. 1   | -0. 230439604 | 0. 001913 | 0. 006424 |
| APLP1     | 19q13. 12 | -0. 230414496 | 0. 001916 | 0. 00643  |
| PDE6D     | 2q37. 1   | 0. 230414496  | 0. 001916 | 0. 00643  |
| TNFAIP3   | 6q23. 3   | -0. 230376833 | 0. 001919 | 0. 00644  |
| NXF5      | Xq22. 1   | -0. 230370808 | 0. 00192  | 0. 00644  |
| DCDC1     | 11p13     | -0. 230368662 | 0. 00192  | 0. 00644  |
| LSM7      | 19p13. 3  | 0. 230360095  | 0. 001921 | 0. 006442 |
| RABIF     | 1q32. 1   | 0. 230353818  | 0. 001921 | 0. 006443 |
| DNAJA1    | 9p21. 1   | -0. 23031197  | 0. 001925 | 0. 006454 |
| BCL9      | 1q21. 2   | -0. 230309878 | 0. 001925 | 0. 006454 |
| DNAH5     | 5p15. 2   | -0. 230257569 | 0. 00193  | 0. 006468 |
| IL26      | 12q15     | -0. 230229692 | 0. 001932 | 0. 006476 |
| GKN2      | 2p13. 3   | 0. 230220257  | 0. 001933 | 0. 006477 |
| GPR83     | 11q21     | -0. 230213788 | 0. 001934 | 0. 006478 |
| JRKL      | 11q21     | 0. 230209445  | 0. 001934 | 0. 006479 |
| CDS1      | 4q21. 23  | 0. 23016969   | 0. 001938 | 0. 00649  |
| RBMX      | Xq26. 3   | -0. 230155044 | 0. 001939 | 0. 006493 |
| TRAPPC2L  | 16q24. 3  | 0. 230138425  | 0. 001941 | 0. 006497 |
| RASL10B   | 17q12     | -0. 23013412  | 0. 001941 | 0. 006497 |
| ISOC2     | 19q13. 42 | 0. 230123658  | 0. 001942 | 0. 006499 |
| BCR       | 22q11. 23 | 0. 230117381  | 0. 001942 | 0. 0065   |
| BAHCC1    | 17q25. 3  | -0. 230109012 | 0. 001943 | 0. 006501 |
| PRKAG2    | 7q36. 1   | -0. 230073442 | 0. 001946 | 0. 006511 |
| KAT2A     | 17q21. 2  | 0. 230042056  | 0. 001949 | 0. 00652  |
| E2F5      | 8q21. 2   | -0. 230016948 | 0. 001952 | 0. 006526 |
| NMNAT1    | 1p36. 22  | -0. 230004394 | 0. 001953 | 0. 006529 |
| STON1-GTF | 2p16. 3   | -0. 229948741 | 0. 001958 | 0. 006544 |
| ZGPAT     | 20q13. 33 | 0. 2299479    | 0. 001958 | 0. 006544 |
| HIST1H2BC | 6p22. 2   | 0. 229924884  | 0. 00196  | 0. 00655  |
| ALOXE3    | 17p13. 1  | 0. 229862715  | 0. 001966 | 0. 006568 |
| ALG8      | 11q14. 1  | 0. 229826544  | 0. 001969 | 0. 006578 |
| HEATR6    | 17q23. 1  | -0. 229819341 | 0. 00197  | 0. 006579 |
| RARS2     | 6q15      | -0. 229774235 | 0. 001974 | 0. 006589 |
| MPC1      | 6q27      | -0. 229774235 | 0. 001974 | 0. 006589 |
| FKBP11    | 12q13. 12 | -0. 229772142 | 0. 001974 | 0. 006589 |
| TMEM131   | 2q11. 2   | -0. 229772142 | 0. 001974 | 0. 006589 |
| AIFM2     | 10q22. 1  | 0. 229759588  | 0. 001975 | 0. 006592 |
| ESF1      | 20p12. 1  | -0. 229744942 | 0. 001977 | 0. 006595 |
| ARFRP1    | 20q13. 33 | 0. 229717741  | 0. 001979 | 0. 006602 |
| ESYT1     | 12q13. 2  | -0. 22965497  | 0. 001985 | 0. 006621 |

|          |           |              |          |          |
|----------|-----------|--------------|----------|----------|
| OXGR1    | 13q32.1   | -0.229623337 | 0.001988 | 0.006629 |
| CEP55    | 10q23.33  | 0.229604754  | 0.00199  | 0.006634 |
| ENTPD7   | 10q24.2   | -0.2295922   | 0.001991 | 0.006637 |
| CDK13    | 7p14.1    | -0.229579646 | 0.001992 | 0.00664  |
| EPS8     | 12p12.3   | 0.22954826   | 0.001995 | 0.006648 |
| ETS1     | 11q24.3   | -0.229533614 | 0.001996 | 0.006652 |
| RPE      | 2q34      | 0.22952106   | 0.001997 | 0.006654 |
| MCAM     | 11q23.3   | -0.229516875 | 0.001998 | 0.006655 |
| CASP8    | 2q33.1    | 0.229510598  | 0.001998 | 0.006655 |
| COX5A    | 15q24.2   | 0.229483397  | 0.002001 | 0.006663 |
| SUMO1P3  | 1q23.2    | 0.229472935  | 0.002002 | 0.006665 |
| CCL14    | 17q12     | -0.229428996 | 0.002006 | 0.006677 |
| CACHD1   | 1p31.3    | -0.229424811 | 0.002006 | 0.006677 |
| TMPO     | 12q23.1   | -0.229424811 | 0.002006 | 0.006677 |
| TMEM229B | 14q24.1   | -0.229401795 | 0.002008 | 0.006683 |
| MAP3K20  | 2q31.1    | -0.22937041  | 0.002011 | 0.006691 |
| SCN4B    | 11q23.3   | -0.229349486 | 0.002013 | 0.006697 |
| ZFAND2B  | 2q35      | 0.229345302  | 0.002014 | 0.006697 |
| PPP2R1A  | 19q13.41  | 0.229322286  | 0.002016 | 0.006702 |
| ELAC2    | 17p12     | -0.229320193 | 0.002016 | 0.006702 |
| IPCEF1   | 6q25.2    | -0.229316009 | 0.002016 | 0.006702 |
| KBTBD4   | 11p11.2   | -0.229313916 | 0.002017 | 0.006702 |
| XKR5     | 8p23.1    | 0.229285702  | 0.002019 | 0.00671  |
| EPB42    | 15q15.2   | -0.229274937 | 0.00202  | 0.006712 |
| NDUFB7   | 19p13.12  | 0.2292637    | 0.002021 | 0.006714 |
| HAS1     | 19q13.41  | -0.229259668 | 0.002022 | 0.006715 |
| TRIQK    | 8q22.1    | -0.22925533  | 0.002022 | 0.006715 |
| EIF2AK2  | 2p22.2    | 0.229240684  | 0.002024 | 0.006718 |
| ZC3H12D  | 6q25.1    | -0.229198837 | 0.002027 | 0.00673  |
| CCM2L    | 20q11.21  | -0.229173728 | 0.00203  | 0.006737 |
| HCG26    | 6p21.33   | 0.229167451  | 0.00203  | 0.006738 |
| SNX22    | 15q22.31  | -0.22915699  | 0.002031 | 0.00674  |
| ATE1     | 10q26.13  | -0.229146528 | 0.002032 | 0.006742 |
| SLC22A16 | 6q21 6q21 | -0.229135759 | 0.002033 | 0.006744 |
| ZNF330   | 4q31.21   | -0.229069111 | 0.00204  | 0.006764 |
| CASP10   | 2q33.1    | 0.228991693  | 0.002047 | 0.006788 |
| LZIC     | 1p36.22   | -0.228981232 | 0.002048 | 0.00679  |
| TPO      | 2p25.3    | -0.228974308 | 0.002049 | 0.006791 |
| PSMB9    | 6p21.32   | 0.228889168  | 0.002057 | 0.006817 |
| SPR      | 2p13.2    | 0.228861967  | 0.002059 | 0.006824 |
| KDEL3    | 22q13.1   | 0.228857783  | 0.00206  | 0.006824 |
| JAK1     | 1p31.3    | -0.228826397 | 0.002063 | 0.006833 |
| CCNDBP1  | 15q15.2   | 0.22882012   | 0.002063 | 0.006834 |
| CLUAP1   | 16p13.3   | -0.228801289 | 0.002065 | 0.006839 |
| ECSCR    | 5q31.2    | -0.228797104 | 0.002066 | 0.006839 |
| ZNF440   | 19p13.2   | 0.228771996  | 0.002068 | 0.006846 |
| 4-Mar    | 2q35      | -0.228746888 | 0.002071 | 0.006853 |
| HSPE1    | 2q33.1    | 0.228692486  | 0.002076 | 0.006869 |
| ATP2C2   | 16q24.1   | 0.228671563  | 0.002078 | 0.006874 |
| DOK6     | 18q22.2   | -0.228659009 | 0.002079 | 0.006877 |
| DMAC2L   | 14q21.3   | -0.228625531 | 0.002082 | 0.006887 |
| IL12A    | 3q25.33   | -0.228560668 | 0.002089 | 0.006907 |
| HSF2BP   | 21q22.3   | 0.228554391  | 0.002089 | 0.006907 |
| TPM2     | 9p13.3    | 0.228541837  | 0.00209  | 0.00691  |



|            |           |              |          |          |
|------------|-----------|--------------|----------|----------|
| SND1       | 7q32.1    | -0.228537652 | 0.002091 | 0.00691  |
| MIF        | 22q11.23  | 0.228520913  | 0.002092 | 0.006915 |
| DOK7       | 4p16.3    | 0.228472789  | 0.002097 | 0.006929 |
| GNB4       | 3q26.33   | -0.228391187 | 0.002105 | 0.006952 |
| KLKB1      | 4q35.2    | -0.228389214 | 0.002105 | 0.006952 |
| ASXL2      | 2p23.3    | -0.228389095 | 0.002105 | 0.006952 |
| CCDC84     | 11q23.3   | 0.228382818  | 0.002106 | 0.006953 |
| SLC6A4     | 17q11.2   | -0.228366491 | 0.002107 | 0.006957 |
| KLRK1      | 12p13.2   | -0.228353525 | 0.002109 | 0.006961 |
| ECHDC3     | 10p14     | -0.228322139 | 0.002112 | 0.00697  |
| PDGFRL     | 8p22      | -0.22831377  | 0.002113 | 0.006971 |
| SLC48A1    | 12q13.11  | -0.228271923 | 0.002117 | 0.006982 |
| XRCC1      | 19q13.31  | 0.228271923  | 0.002117 | 0.006982 |
| RBM24      | 6p22.3    | -0.228267738 | 0.002117 | 0.006982 |
| FAM207A    | 21q22.3   | 0.228238445  | 0.00212  | 0.006991 |
| SRSF2      | 17q25.1   | 0.228225891  | 0.002121 | 0.006994 |
| ZNF408     | 11p11.2   | 0.22819869   | 0.002124 | 0.007001 |
| RHPN1      | 8q24.3    | 0.228184044  | 0.002125 | 0.007005 |
| TMEM51-AS1 | 1p36.21   | 0.228152658  | 0.002128 | 0.007014 |
| ITFG2      | 12p13.33  | -0.22812755  | 0.002131 | 0.007021 |
| SLC15A1    | 13q32.2-c | 0.228120346  | 0.002132 | 0.007022 |
| FOLR2      | 11q13.4   | -0.228062687 | 0.002137 | 0.00704  |
| TASOR2     | 10p15.1   | -0.228022932 | 0.002141 | 0.007052 |
| THSD1      | 13q14.3   | -0.22801247  | 0.002142 | 0.007054 |
| CCDC24     | 1p34.1    | 0.228006193  | 0.002143 | 0.007055 |
| PAX6       | 11p13     | -0.227993639 | 0.002144 | 0.007058 |
| PLAA       | 9p21.2    | -0.227983177 | 0.002145 | 0.00706  |
| PANK4      | 1p36.32   | -0.227972716 | 0.002146 | 0.007062 |
| STARD7-AS2 | 2q11.2    | -0.227937146 | 0.00215  | 0.007073 |
| ADAMTS5    | 21q21.3   | -0.227928776 | 0.002151 | 0.007074 |
| SLC25A42   | 19p13.11  | -0.227909945 | 0.002152 | 0.007079 |
| COL6A6     | 3q22.1    | -0.227875686 | 0.002156 | 0.007089 |
| POLK       | 5q13.3    | -0.227832528 | 0.00216  | 0.007102 |
| TPTE       | 21p11.2   | -0.227819469 | 0.002161 | 0.007105 |
| TBP        | 6q27      | -0.227794865 | 0.002164 | 0.007112 |
| NKD2       | 5p15.33   | 0.227725818  | 0.002171 | 0.007134 |
| HMG3       | 6q14.1    | -0.227723725 | 0.002171 | 0.007134 |
| MTX3       | 5q14.1    | -0.227715356 | 0.002172 | 0.007135 |
| GOLGA8CP   | 15q11.2   | -0.227683329 | 0.002175 | 0.007144 |
| FAM92B     | 16q24.1   | -0.227669004 | 0.002177 | 0.007148 |
| KRTAP3-3   | 17q21.2   | -0.227654102 | 0.002178 | 0.007152 |
| PPP1R3F    | Xp11.23   | -0.227650493 | 0.002178 | 0.007152 |
| GPA33      | 1q24.1    | 0.227633754  | 0.00218  | 0.007155 |
| PRDM2      | 1p36.21   | -0.227633754 | 0.00218  | 0.007155 |
| HOXD1      | 2q31.1    | -0.227579353 | 0.002186 | 0.007172 |
| ZNF235     | 19q13.31  | -0.227558429 | 0.002188 | 0.007178 |
| NAT2       | 8p22      | 0.227536491  | 0.00219  | 0.007183 |
| CNTFR      | 9p13.3    | -0.227533609 | 0.00219  | 0.007183 |
| CHN2       | 7p14.3    | -0.227420334 | 0.002202 | 0.00722  |
| MEG8       | 14q32.2-c | -0.227405203 | 0.002203 | 0.007224 |
| CXCL16     | 17p13.2   | 0.227391041  | 0.002205 | 0.007227 |
| WBP4       | 13q14.11  | -0.227388948 | 0.002205 | 0.007227 |
| SPATA33    | 16q24.3   | 0.227351286  | 0.002209 | 0.007238 |
| ZSCAN12P16 | 2p22.1    | -0.227317808 | 0.002212 | 0.007248 |

|           |            |               |           |           |
|-----------|------------|---------------|-----------|-----------|
| TMEM229A  | 7q31. 32   | -0. 227228122 | 0. 002221 | 0. 007277 |
| NIF3L1    | 2q33. 1    | 0. 227219586  | 0. 002222 | 0. 007279 |
| RHBDL1    | 16p13. 3   | 0. 227190174  | 0. 002225 | 0. 007288 |
| ANAPC11   | 17q25. 3   | 0. 227131588  | 0. 002231 | 0. 007306 |
| DRD3      | 3q13. 31   | -0. 22709309  | 0. 002235 | 0. 007318 |
| TAF3      | 10p14      | -0. 227088814 | 0. 002236 | 0. 007318 |
| NT5C2     | 10q24. 32- | 0. 227066725  | 0. 002238 | 0. 007324 |
| PLA2G3    | 22q12. 2   | 0. 227012498  | 0. 002244 | 0. 007341 |
| DNAI2     | 17q25. 1   | -0. 227003065 | 0. 002245 | 0. 007343 |
| PLEKHH3   | 17q21. 2   | 0. 226899337  | 0. 002255 | 0. 007377 |
| DNAJB5    | 9p13. 3    | -0. 22689306  | 0. 002256 | 0. 007378 |
| COMMD6    | 13q22. 2   | 0. 226867951  | 0. 002259 | 0. 007385 |
| TRMT61A   | 14q32. 33  | 0. 226865859  | 0. 002259 | 0. 007385 |
| TMPRSS5   | 11q23. 2   | 0. 226838777  | 0. 002262 | 0. 007392 |
| ATP6VOC   | 16p13. 3   | 0. 226838658  | 0. 002262 | 0. 007392 |
| TNMD      | Xq22. 1    | -0. 226807888 | 0. 002265 | 0. 007401 |
| SDC3      | 1p35. 2    | -0. 226800996 | 0. 002266 | 0. 007401 |
| TVP23B    | 17p11. 2   | -0. 226800996 | 0. 002266 | 0. 007401 |
| SLC1A5    | 19q13. 32  | 0. 226769611  | 0. 002269 | 0. 00741  |
| ZMYM4     | 1p34. 3    | -0. 226767518 | 0. 002269 | 0. 00741  |
| HSP90AB2F | 4p15. 33   | -0. 226738225 | 0. 002272 | 0. 007419 |
| PSAP      | 10q22. 1   | -0. 226727763 | 0. 002273 | 0. 007421 |
| BCAS4     | 20q13. 13  | 0. 226677547  | 0. 002278 | 0. 007437 |
| TP53I11   | 11p11. 2   | 0. 226675455  | 0. 002279 | 0. 007437 |
| PKP1      | 1q32. 1    | 0. 226669177  | 0. 002279 | 0. 007438 |
| PEX12     | 17q12      | -0. 226660808 | 0. 00228  | 0. 007439 |
| PLAGL1    | 6q24. 2    | -0. 2266357   | 0. 002283 | 0. 007447 |
| SLC44A1   | 9q31. 1-q5 | 0. 226616869  | 0. 002285 | 0. 007452 |
| FCHSD2    | 11q13. 4   | -0. 226552006 | 0. 002292 | 0. 007473 |
| LRRC70    | 5q12. 1    | -0. 226541544 | 0. 002293 | 0. 007475 |
| VANGL1    | 1p13. 1    | 0. 226539451  | 0. 002293 | 0. 007475 |
| ZNF570    | 19q13. 12  | -0. 226491327 | 0. 002298 | 0. 00749  |
| RICTOR    | 5p13. 1    | -0. 226480865 | 0. 002299 | 0. 007493 |
| PCTP      | 17q22      | 0. 226418095  | 0. 002306 | 0. 007513 |
| INPP5K    | 17p13. 3   | -0. 226411818 | 0. 002306 | 0. 007514 |
| ERCC2     | 19q13. 32  | 0. 226405541  | 0. 002307 | 0. 007515 |
| MARF1     | 16p13. 11  | -0. 226372063 | 0. 002311 | 0. 007525 |
| CHCHD5    | 2q14. 1    | 0. 226365786  | 0. 002311 | 0. 007526 |
| G6PD      | Xq28       | 0. 226349047  | 0. 002313 | 0. 007531 |
| C10RF194  | 1p13. 3    | -0. 226332251 | 0. 002315 | 0. 007536 |
| JAGN1     | 3p25. 3    | 0. 226319754  | 0. 002316 | 0. 007539 |
| R3HDM2    | 12q13. 3   | -0. 226309292 | 0. 002317 | 0. 007541 |
| GFOD1     | 6p23       | 0. 226303015  | 0. 002318 | 0. 007541 |
| TICRR     | 15q26. 1   | 0. 226303015  | 0. 002318 | 0. 007541 |
| STRC      | 15q15. 3   | 0. 226273722  | 0. 002321 | 0. 00755  |
| MAP6      | 11q13. 5   | -0. 226267445 | 0. 002322 | 0. 007551 |
| ADAL      | 15q15. 3   | -0. 226256983 | 0. 002323 | 0. 007553 |
| TUBB2B    | 6p25. 2    | -0. 226254891 | 0. 002323 | 0. 007553 |
| ABL2      | 1q25. 2    | -0. 226217228 | 0. 002327 | 0. 007564 |
| ACTL6B    | 7q22. 1    | -0. 226206884 | 0. 002328 | 0. 007567 |
| STARD3NL  | 7p14. 1    | -0. 226202582 | 0. 002329 | 0. 007567 |
| ARID3A    | 19p13. 3   | -0. 226190028 | 0. 00233  | 0. 00757  |
| NUTM2F    | 9q22. 32   | 0. 226171315  | 0. 002332 | 0. 007575 |
| SPRR4     | 1q21. 3    | 0. 226050944  | 0. 002345 | 0. 007616 |

|            |          |              |          |          |
|------------|----------|--------------|----------|----------|
| WRN        | 8p12     | -0.226003808 | 0.00235  | 0.007631 |
| FAM228B    | 2p23.3   | -0.226001716 | 0.00235  | 0.007631 |
| RANBP10    | 16q22.1  | -0.225984977 | 0.002352 | 0.007636 |
| BCL7A      | 12q24.31 | -0.225980792 | 0.002353 | 0.007636 |
| SLC4A7     | 3p24.1   | -0.225949407 | 0.002356 | 0.007646 |
| HOXC9      | 12q13.13 | 0.225936971  | 0.002357 | 0.007649 |
| CAPSL      | 5p13.2   | -0.225889829 | 0.002362 | 0.007664 |
| DNAJC15    | 13q14.11 | 0.225861528  | 0.002366 | 0.007673 |
| RCAN1      | 21q22.12 | -0.225846881 | 0.002367 | 0.007677 |
| DYNC1I2    | 2q31.1   | 0.225794572  | 0.002373 | 0.007694 |
| RGS18      | 1q31.2   | -0.225790388 | 0.002373 | 0.007694 |
| FUNDC2     | Xq28     | -0.225759002 | 0.002377 | 0.007704 |
| LSM1       | 8p11.23  | 0.225712971  | 0.002382 | 0.007719 |
| GPKOW      | Xp11.23  | 0.225675308  | 0.002386 | 0.007731 |
| WDR20      | 14q32.31 | -0.225631369 | 0.002391 | 0.007745 |
| CARM1      | 19p13.2  | 0.225616722  | 0.002392 | 0.007749 |
| DNASE1     | 16p13.3  | -0.225589521 | 0.002395 | 0.007758 |
| ERCC1      | 19q13.32 | 0.22557069   | 0.002397 | 0.007763 |
| JAK3       | 19p13.11 | -0.225520474 | 0.002403 | 0.00778  |
| NEMP1      | 12q13.3  | -0.225489088 | 0.002406 | 0.00779  |
| ELF4       | Xq26.1   | 0.225482811  | 0.002407 | 0.007791 |
| ANAPC5     | 12q24.31 | -0.225466072 | 0.002409 | 0.007795 |
| RAB26      | 16p13.3  | -0.225355178 | 0.002421 | 0.007834 |
| SYS1       | 20q13.12 | -0.225319607 | 0.002425 | 0.007845 |
| MRM3       | 17p13.3  | -0.22527776  | 0.00243  | 0.007859 |
| KLHL17     | 1p36.33  | 0.225275668  | 0.00243  | 0.007859 |
| KRI1       | 19p13.2  | 0.225271483  | 0.00243  | 0.007859 |
| USP27X-AS1 | Xp11.23  | -0.225261021 | 0.002432 | 0.007861 |
| HHLA2      | 3q13.13  | 0.225254744  | 0.002432 | 0.007862 |
| C11ORF49   | 11p11.2  | 0.225252652  | 0.002432 | 0.007862 |
| UBR2       | 6p21.1   | -0.225248467 | 0.002433 | 0.007862 |
| LPL        | 8p21.3   | -0.22524219  | 0.002434 | 0.007862 |
| KIF13A     | 6p22.3   | -0.225240098 | 0.002434 | 0.007862 |
| CAB39L     | 13q14.2  | -0.225210805 | 0.002437 | 0.007872 |
| GYPE       | 4q31.21  | -0.225198369 | 0.002438 | 0.007875 |
| COQ8A      | 1q42.13  | -0.225194066 | 0.002439 | 0.007875 |
| SNRNP48    | 6p24.3   | -0.225189881 | 0.002439 | 0.007875 |
| AP1B1      | 22q12.2  | -0.225156404 | 0.002443 | 0.007884 |
| HPGD       | 4q34.1   | 0.225156404  | 0.002443 | 0.007884 |
| TM7SF2     | 11q13.1  | 0.225156404  | 0.002443 | 0.007884 |
| ZNF281     | 1q32.1   | -0.225148152 | 0.002444 | 0.007885 |
| PEAK1      | 15q24.3  | -0.225137572 | 0.002445 | 0.007888 |
| RNF34      | 12q24.31 | -0.225083171 | 0.002451 | 0.007906 |
| CFAP298    | 21q22.11 | 0.225074802  | 0.002452 | 0.007908 |
| NDUFA7     | 19p13.2  | 0.225066432  | 0.002453 | 0.00791  |
| CIAO3      | 16p13.3  | 0.22502877   | 0.002457 | 0.007922 |
| HEPH       | Xq12     | 0.224980646  | 0.002463 | 0.007938 |
| MGAT1      | 5q35.3   | -0.224965999 | 0.002465 | 0.007942 |
| VPS26B     | 11q25    | -0.224880213 | 0.002474 | 0.007972 |
| ASCL2      | 11p15.5  | -0.224871961 | 0.002475 | 0.007974 |
| PLSCR3     | 17p13.1  | 0.224844643  | 0.002478 | 0.007983 |
| LRRC7      | 1p31.1   | -0.224838447 | 0.002479 | 0.007984 |
| PCDHA4     | 5q31.3   | -0.224825929 | 0.00248  | 0.007987 |
| GSTCD      | 4q24     | -0.224802795 | 0.002483 | 0.007994 |

|           |           |              |          |          |
|-----------|-----------|--------------|----------|----------|
| UBE3A     | 15q11.2   | -0.224760948 | 0.002488 | 0.008008 |
| PCDHA7    | 5q31.3    | -0.224755141 | 0.002488 | 0.008009 |
| UBE2L6    | 11q12.1   | 0.224696085  | 0.002495 | 0.008029 |
| KHDRBS2   | 6q11.1    | -0.224673086 | 0.002498 | 0.008036 |
| FBX046    | 19q13.32  | 0.224664817  | 0.002499 | 0.008038 |
| WDR48     | 3p22.2    | -0.224633315 | 0.002502 | 0.008047 |
| RTN4RL1   | 17p13.3   | -0.224631222 | 0.002503 | 0.008047 |
| SUV39H2   | 10p13     | -0.224631222 | 0.002503 | 0.008047 |
| GJD3      | 17q21.2   | -0.224608206 | 0.002505 | 0.008054 |
| TMEM257   | Xq27.3    | -0.224574319 | 0.002509 | 0.008065 |
| TTC39C    | 18q11.2   | -0.224543343 | 0.002513 | 0.008075 |
| DAPK1     | 9q21.33   | 0.224537066  | 0.002513 | 0.008076 |
| NANP      | 20p11.21  | -0.224534974 | 0.002514 | 0.008076 |
| NELFA     | 4p16.3    | 0.224524512  | 0.002515 | 0.008078 |
| TMEM273   | 10q11.23  | -0.224520797 | 0.002515 | 0.008078 |
| RIPOR2    | 6p22.3    | -0.224461741 | 0.002522 | 0.008099 |
| PSMB4     | 1q21.3    | 0.224430356  | 0.002526 | 0.008107 |
| RFPL1S    | 22q12.2   | -0.224430356 | 0.002526 | 0.008107 |
| DUOX2     | 15q21.1   | 0.224428264  | 0.002526 | 0.008107 |
| PTGDR     | 14q22.1   | -0.224421058 | 0.002527 | 0.008108 |
| CCDC43    | 17q21.31  | 0.224417802  | 0.002527 | 0.008108 |
| IFRD1     | 7q31.1    | -0.2243634   | 0.002533 | 0.008127 |
| NKX2-4    | 20p11.22  | -0.224334375 | 0.002537 | 0.008137 |
| UBE2E1    | 3p24.2    | 0.224306907  | 0.00254  | 0.008146 |
| ZP2       | 16p12.3-1 | -0.224252153 | 0.002546 | 0.008165 |
| ARHGEF33  | 2p22.1    | -0.224244253 | 0.002547 | 0.008166 |
| RASSF4    | 10q11.21  | -0.224239951 | 0.002548 | 0.008166 |
| CSRNP3    | 2q24.3    | -0.224237859 | 0.002548 | 0.008166 |
| TTC39B    | 9p22.3    | -0.22420136  | 0.002552 | 0.008177 |
| IFIT3     | 10q23.31  | 0.224200197  | 0.002552 | 0.008177 |
| APOF      | 12q13.3   | -0.224115678 | 0.002562 | 0.008208 |
| EML3      | 11q12.3   | 0.224039085  | 0.002571 | 0.008234 |
| SAMD9L    | 7q21.2    | 0.224036993  | 0.002571 | 0.008234 |
| SGK1      | 6q23.2    | -0.224034901 | 0.002571 | 0.008234 |
| RBAKDN    | 7p22.1    | 0.223979913  | 0.002578 | 0.008253 |
| RAB10     | 2p23.3    | 0.223976315  | 0.002578 | 0.008253 |
| TAOK1     | 17q11.2   | -0.22397213  | 0.002579 | 0.008254 |
| OSCAR     | 19q13.42  | 0.223930283  | 0.002584 | 0.008268 |
| SRPK1     | 6p21.31   | 0.223926098  | 0.002584 | 0.008268 |
| PRC1      | 15q26.1   | 0.223924006  | 0.002584 | 0.008268 |
| RPL27A    | 11p15.4   | 0.223919821  | 0.002585 | 0.008268 |
| HOMER1    | 5q14.1    | -0.22382148  | 0.002597 | 0.008303 |
| TCF25     | 16q24.3   | 0.223815203  | 0.002597 | 0.008303 |
| GLP2R     | 17p13.1   | -0.223813579 | 0.002598 | 0.008303 |
| USHBP1    | 19p13.11  | -0.223813111 | 0.002598 | 0.008303 |
| PTRH2     | 17q23.1   | 0.223802649  | 0.002599 | 0.008305 |
| CEP250    | 20q11.22  | -0.223798464 | 0.002599 | 0.008306 |
| RNF40     | 16p11.2   | 0.223777541  | 0.002602 | 0.008312 |
| IKZF3     | 17q12-q21 | -0.223769639 | 0.002603 | 0.008314 |
| IL2RB     | 22q12.3   | -0.223767079 | 0.002603 | 0.008314 |
| QRICH2    | 17q25.1   | -0.223737786 | 0.002606 | 0.008323 |
| COX7B     | Xq21.1    | 0.223662461  | 0.002615 | 0.008351 |
| ZSWIM4    | 19p13.13- | 0.223631076  | 0.002619 | 0.008361 |
| LOC285847 | 6p21.31   | -0.223622811 | 0.00262  | 0.008363 |

|           |            |               |           |           |
|-----------|------------|---------------|-----------|-----------|
| MMP1      | 11q22. 2   | 0. 223568305  | 0. 002627 | 0. 008382 |
| LIAS      | 4p14       | -0. 223522273 | 0. 002632 | 0. 008399 |
| SPG7      | 16q24. 3   | 0. 223359069  | 0. 002652 | 0. 00846  |
| HBB       | 11p15. 4   | -0. 223331869 | 0. 002655 | 0. 008469 |
| ACOT12    | 5q14. 1    | -0. 223312638 | 0. 002657 | 0. 008475 |
| DLGAP3    | 1p34. 3    | -0. 223281652 | 0. 002661 | 0. 008485 |
| TMPRSS6   | 22q12. 3   | -0. 223259799 | 0. 002664 | 0. 008492 |
| CNFN      | 19q13. 2   | 0. 223239805  | 0. 002666 | 0. 008499 |
| KDM4A     | 1p34. 2-pc | -0. 223223066 | 0. 002668 | 0. 008503 |
| C9ORF78   | 9q34. 11   | -0. 223220974 | 0. 002668 | 0. 008503 |
| RFX6      | 6q22. 1    | -0. 223194351 | 0. 002672 | 0. 008512 |
| LINC00324 | 17p13. 1   | -0. 223174942 | 0. 002674 | 0. 008518 |
| JARID2    | 6p22. 3    | -0. 22317285  | 0. 002674 | 0. 008518 |
| CASC2     | 10q26. 11  | -0. 22309334  | 0. 002684 | 0. 008547 |
| KCNQ5     | 6q13       | -0. 222999184 | 0. 002695 | 0. 008582 |
| TSHR      | 14q31. 1   | -0. 222974654 | 0. 002698 | 0. 008591 |
| SYNP02    | 4q26       | -0. 222946875 | 0. 002702 | 0. 0086   |
| CREM      | 10p11. 21  | -0. 222930136 | 0. 002704 | 0. 008602 |
| TEX261    | 2p13. 3    | -0. 222930136 | 0. 002704 | 0. 008602 |
| CEP128    | 14q31. 1   | -0. 222928044 | 0. 002704 | 0. 008602 |
| EFHC1     | 6p12. 2    | -0. 222925951 | 0. 002704 | 0. 008602 |
| MTIF3     | 13q12. 2   | 0. 222923859  | 0. 002705 | 0. 008602 |
| GTF2IP1   | 7q11. 23   | -0. 22287155  | 0. 002711 | 0. 008621 |
| SYT9      | 11p15. 4   | -0. 222827611 | 0. 002716 | 0. 008637 |
| GPR55     | 2q37. 1    | -0. 222817615 | 0. 002718 | 0. 00864  |
| MYO10     | 5p15. 1    | -0. 222760655 | 0. 002725 | 0. 008661 |
| ZNFX1     | 20q13. 13  | 0. 222743916  | 0. 002727 | 0. 008666 |
| NOP56     | 20p13      | -0. 222714623 | 0. 00273  | 0. 008676 |
| WDR90     | 16p13. 3   | 0. 222679053  | 0. 002735 | 0. 008687 |
| KDELR1    | 19q13. 33  | 0. 222676961  | 0. 002735 | 0. 008687 |
| MAPK15    | -          | 0. 222674869  | 0. 002735 | 0. 008687 |
| ANKRD2    | 10q24. 2   | 0. 222647905  | 0. 002739 | 0. 008697 |
| BEND3P3   | 10q22. 3   | -0. 222628837 | 0. 002741 | 0. 008703 |
| DNTTIP2   | 1p22. 1    | 0. 222584897  | 0. 002746 | 0. 008718 |
| MORF4     | 4q34. 1    | -0. 222581766 | 0. 002747 | 0. 008718 |
| KIF2A     | 5q12. 1    | -0. 22257862  | 0. 002747 | 0. 008718 |
| ZBTB11    | 3q12. 3    | -0. 222563974 | 0. 002749 | 0. 008723 |
| LINC00910 | 17q21. 31  | 0. 22255142   | 0. 002751 | 0. 008726 |
| ACSS2     | 20q11. 22  | 0. 222513757  | 0. 002755 | 0. 00874  |
| TMIE      | 3p21. 31   | 0. 222500273  | 0. 002757 | 0. 008744 |
| ESCO2     | 8p21. 1    | 0. 222456334  | 0. 002762 | 0. 00876  |
| ASH1L     | 1q22       | -0. 222419601 | 0. 002767 | 0. 008773 |
| EMID1     | 22q12. 2   | -0. 222409139 | 0. 002768 | 0. 008776 |
| EPB41     | 1p35. 3    | -0. 22240077  | 0. 002769 | 0. 008778 |
| MCM10     | 10p13      | 0. 222333815  | 0. 002778 | 0. 008803 |
| EVI5L     | 19p13. 2   | 0. 22232126   | 0. 002779 | 0. 008806 |
| E2F8      | 11p15. 1   | 0. 222314983  | 0. 00278  | 0. 008808 |
| RAMP3     | 7p13       | -0. 222279413 | 0. 002785 | 0. 00882  |
| KREMEN2   | 16p13. 3   | 0. 222258606  | 0. 002787 | 0. 008827 |
| VPS25     | 17q21. 2   | 0. 222233381  | 0. 00279  | 0. 008836 |
| GOLT1B    | 12p12. 1   | -0. 222181073 | 0. 002797 | 0. 008855 |
| MRPL4     | 19p13. 2   | 0. 222153872  | 0. 0028   | 0. 008865 |
| PKD1L3    | 16q22. 2   | -0. 222146694 | 0. 002801 | 0. 008866 |
| ZXDC      | 3q21. 3    | -0. 221969745 | 0. 002824 | 0. 008935 |

|           |            |               |           |           |
|-----------|------------|---------------|-----------|-----------|
| DENND2D   | 1p13. 3-p1 | 0. 221967652  | 0. 002824 | 0. 008935 |
| SLC25A40  | 7q21. 12   | -0. 221959283 | 0. 002825 | 0. 008937 |
| GRHL2     | 8q22. 3    | 0. 221927897  | 0. 002829 | 0. 008949 |
| TMEM230   | 20p13-p12  | -0. 221900697 | 0. 002833 | 0. 008958 |
| ARMH4     | 14q23. 1   | -0. 221854665 | 0. 002839 | 0. 008975 |
| CDCA3     | 12p13. 31  | 0. 221846295  | 0. 00284  | 0. 008977 |
| REXO2     | 11q23. 2   | 0. 221806541  | 0. 002845 | 0. 008992 |
| TMEM255A  | Xq24       | -0. 221802356 | 0. 002845 | 0. 008992 |
| PRCC      | 1q23. 1    | 0. 221796079  | 0. 002846 | 0. 008993 |
| TEX10     | 9q31. 1    | -0. 221760509 | 0. 002851 | 0. 009006 |
| ASS1      | 9q34. 11   | 0. 221727031  | 0. 002855 | 0. 009019 |
| LOC93429  | 19q13. 32  | 0. 221702387  | 0. 002858 | 0. 009027 |
| HOXA3     | 7p15. 2    | 0. 221693553  | 0. 002859 | 0. 009029 |
| NFATC3    | 16q22. 1   | -0. 221616136 | 0. 002869 | 0. 00906  |
| POPDC3    | 6q21       | -0. 221583238 | 0. 002873 | 0. 009072 |
| HMGCLL1   | 6p12. 1    | -0. 221572776 | 0. 002875 | 0. 009074 |
| OPRD1     | 1p35. 3    | -0. 221545813 | 0. 002878 | 0. 009084 |
| SIX1      | 14q23. 1   | 0. 221491757  | 0. 002885 | 0. 009104 |
| NEXN      | 1p31. 1    | -0. 221490595 | 0. 002885 | 0. 009104 |
| BORA      | 13q21. 33  | 0. 221473856  | 0. 002888 | 0. 009109 |
| ZNF780B   | 19q13. 2   | -0. 221455025 | 0. 00289  | 0. 009115 |
| OBP2A     | 9q34. 3    | 0. 221436316  | 0. 002893 | 0. 009121 |
| OR10G4    | 11q24. 2   | -0. 22143502  | 0. 002893 | 0. 009121 |
| NHEJ1     | 2q35       | 0. 221420617  | 0. 002895 | 0. 009125 |
| KBTBD3    | 11q22. 3   | -0. 221413178 | 0. 002896 | 0. 009127 |
| BHLHE41   | 12p12. 1   | 0. 221400624  | 0. 002897 | 0. 00913  |
| KDM4C     | 9p24. 1    | -0. 221398531 | 0. 002897 | 0. 00913  |
| CTSF      | 11q13. 2   | -0. 221381792 | 0. 0029   | 0. 009135 |
| LRRC37BP1 | 17q11. 2   | -0. 221323206 | 0. 002907 | 0. 009158 |
| EIF3I     | 1p35. 2    | 0. 221231143  | 0. 002919 | 0. 009195 |
| C4ORF50   | 4p16. 1    | -0. 221203427 | 0. 002923 | 0. 009204 |
| MMP26     | 11p15. 4   | -0. 221202955 | 0. 002923 | 0. 009204 |
| YTHDC2    | 5q22. 2    | -0. 221191388 | 0. 002925 | 0. 009206 |
| FLG       | 1q21. 3    | -0. 221190573 | 0. 002925 | 0. 009206 |
| ANP32A    | 15q23      | 0. 221176741  | 0. 002927 | 0. 00921  |
| ASH1L-AS1 | 1q22       | 0. 221162095  | 0. 002928 | 0. 009215 |
| CCP110    | 16p12. 3   | -0. 22115791  | 0. 002929 | 0. 009215 |
| TIMM17A   | 1q32. 1    | 0. 221111878  | 0. 002935 | 0. 009233 |
| CCDC124   | 19p13. 11  | 0. 221098394  | 0. 002937 | 0. 009237 |
| CDKL3     | 5q31. 1    | -0. 221067939 | 0. 002941 | 0. 009248 |
| RPS19     | 19q13. 2   | 0. 221063754  | 0. 002941 | 0. 009248 |
| COX8C     | 14q32. 12  | -0. 221038955 | 0. 002945 | 0. 009257 |
| SLC22A10  | 11q12. 3   | -0. 221016659 | 0. 002948 | 0. 009265 |
| ALDH1A1   | 9q21. 13   | -0. 221003076 | 0. 002949 | 0. 009268 |
| CHMP4A    | 14q12      | 0. 220998891  | 0. 00295  | 0. 009268 |
| EEF2      | 19p13. 3   | -0. 220998891 | 0. 00295  | 0. 009268 |
| SGO1      | 3p24. 3    | 0. 220988429  | 0. 002951 | 0. 009271 |
| VSIG10    | 12q24. 23  | 0. 220917289  | 0. 002961 | 0. 009299 |
| CD164L2   | 1p36. 11   | 0. 220862888  | 0. 002968 | 0. 00932  |
| ACKR2     | 3p22. 1    | -0. 220781286 | 0. 002979 | 0. 009353 |
| PTPRZ1    | 7q31. 32   | -0. 220760362 | 0. 002982 | 0. 00936  |
| TCEAL2    | Xq22. 1    | -0. 220749901 | 0. 002983 | 0. 009363 |
| RHO       | 3q22. 1    | 0. 220693519  | 0. 002991 | 0. 009386 |
| STAG3     | 7q22. 1    | -0. 220639006 | 0. 002998 | 0. 009407 |

|           |            |              |          |          |
|-----------|------------|--------------|----------|----------|
| ELL3      | 15q15.3    | 0.220609713  | 0.003002 | 0.009418 |
| EBF2      | 8p21.2     | -0.220603897 | 0.003003 | 0.009419 |
| KRR1      | 12q21.2    | -0.220588789 | 0.003005 | 0.009424 |
| GRPR      | Xp22.2     | -0.220580643 | 0.003006 | 0.009424 |
| DTX4      | 11q12.1    | 0.22058042   | 0.003006 | 0.009424 |
| MUC5B     | 11p15.5    | 0.220576235  | 0.003007 | 0.009425 |
| MNAT1     | 14q23.1    | 0.220567866  | 0.003008 | 0.009427 |
| SNORD116  | 15q11.2    | -0.220563681 | 0.003008 | 0.009427 |
| RPRD2     | 1q21.2     | -0.220549034 | 0.00301  | 0.009432 |
| NHLRC2    | 10q25.3    | -0.220477894 | 0.00302  | 0.00946  |
| ACY3      | 11q13.2    | 0.220433955  | 0.003026 | 0.009478 |
| AIFM1     | Xq26.1     | -0.220417216 | 0.003028 | 0.009483 |
| MRPL42    | 12q22      | -0.220371184 | 0.003034 | 0.009501 |
| PPP2R2A   | 8p21.2     | 0.220339799  | 0.003039 | 0.009513 |
| DIP2C     | 10p15.3    | -0.220312598 | 0.003042 | 0.009523 |
| EMX1      | 2p13.2     | 0.220301394  | 0.003044 | 0.009527 |
| ZNF541    | 19q13.33   | -0.22028561  | 0.003046 | 0.009532 |
| SLC25A46  | 5q22.1     | -0.220266566 | 0.003049 | 0.009539 |
| GLI4      | 8q24.3     | 0.220237273  | 0.003053 | 0.00955  |
| CST5      | 20p11.21   | 0.220231434  | 0.003053 | 0.009551 |
| KNCN      | 1p33       | -0.220221563 | 0.003055 | 0.009553 |
| CYP4V2    | 4q35.1-q36 | -0.220161948 | 0.003063 | 0.009577 |
| FAM185A   | 7q22.1     | 0.220153579  | 0.003064 | 0.009579 |
| CD226     | 18q22.2    | -0.220151487 | 0.003064 | 0.009579 |
| COQ7      | 16p12.3    | -0.220130563 | 0.003067 | 0.009586 |
| DMRT2     | 9p24.3     | -0.2200939   | 0.003072 | 0.009599 |
| CLIC2     | Xq28       | -0.220092901 | 0.003072 | 0.009599 |
| ILVBL     | 19p13.12   | 0.220067792  | 0.003076 | 0.009609 |
| ZNF75D    | Xq26.3     | -0.220044776 | 0.003079 | 0.009617 |
| CRYBB3    | 22q11.23   | 0.220030441  | 0.003081 | 0.009622 |
| LRRC45    | 17q25.3    | 0.220017576  | 0.003083 | 0.009626 |
| C19ORF53  | 19p13.13   | 0.219973636  | 0.003089 | 0.009643 |
| ZNF595    | 4p16.3     | -0.219967359 | 0.00309  | 0.009645 |
| CD5       | 11q12.2    | -0.219963175 | 0.00309  | 0.009645 |
| C10ORF71  | 10q11.23   | -0.219946914 | 0.003093 | 0.00965  |
| GCNT2     | 6p24.3-p25 | 0.219933882  | 0.003094 | 0.009653 |
| FAM72D    | 1q21.1     | 0.219933882  | 0.003094 | 0.009653 |
| C5ORF51   | 5p13.1     | -0.219921327 | 0.003096 | 0.009657 |
| FKBP5     | 6p21.31    | -0.219829264 | 0.003109 | 0.009695 |
| HDGFL2    | 19p13.3    | 0.219812525  | 0.003111 | 0.0097   |
| SH2D5     | 1p36.12    | 0.219810536  | 0.003111 | 0.0097   |
| WDR46     | 6p21.32    | 0.219804155  | 0.003112 | 0.009702 |
| EIF4ENIF1 | 22q12.2    | -0.219722554 | 0.003124 | 0.009735 |
| TSPAN12   | 7q31.31    | -0.219668152 | 0.003131 | 0.009758 |
| MYLK4     | 6p25.2     | -0.219647344 | 0.003134 | 0.009765 |
| 1-Mar     | 4q32.2-q33 | -0.219645136 | 0.003135 | 0.009765 |
| HOOK2     | 19p13.13   | 0.219605382  | 0.00314  | 0.00978  |
| GOLIM4    | 3q26.2     | -0.21959492  | 0.003142 | 0.009784 |
| TCAIM     | 3p21.31    | 0.219563534  | 0.003146 | 0.009795 |
| SEPTIN1   | 16p11.2    | -0.219561442 | 0.003146 | 0.009795 |
| GTF3C1    | 16p12.1    | -0.219555165 | 0.003147 | 0.009796 |
| EMP2      | 16p13.13   | 0.21951541   | 0.003153 | 0.009812 |
| WNT2B     | 1p13.2     | -0.21948821  | 0.003157 | 0.009823 |
| PSMD8     | 19q13.2    | 0.219477748  | 0.003158 | 0.009826 |

|           |            |               |           |           |
|-----------|------------|---------------|-----------|-----------|
| CEP104    | 1p36. 32   | -0. 219467286 | 0. 00316  | 0. 009829 |
| DDR1      | 6p21. 33   | 0. 219450547  | 0. 003162 | 0. 009835 |
| SLC25A43  | Xq24       | 0. 219345929  | 0. 003177 | 0. 009879 |
| SLC16A1   | 1p13. 2    | 0. 219320821  | 0. 00318  | 0. 009889 |
| PPP4R1L   | 20q13. 32  | 0. 219272697  | 0. 003187 | 0. 009908 |
| SIPA1L2   | 1q42. 2    | -0. 219270604 | 0. 003187 | 0. 009908 |
| TIGD6     | 5q32       | -0. 219245496 | 0. 003191 | 0. 009915 |
| CD81      | 11p15. 5   | -0. 219241311 | 0. 003192 | 0. 009915 |
| GPR1      | 2q33. 3    | 0. 219239219  | 0. 003192 | 0. 009915 |
| LCE3E     | 1q21. 3    | 0. 219239023  | 0. 003192 | 0. 009915 |
| CSNK1G2   | 19p13. 3   | 0. 219226665  | 0. 003194 | 0. 009919 |
| HYAL4     | 7q31. 32   | 0. 219210992  | 0. 003196 | 0. 009925 |
| XRCC5     | 2q35       | 0. 219172264  | 0. 003201 | 0. 00994  |
| MAIP1     | 2q33. 1    | 0. 219157617  | 0. 003203 | 0. 009945 |
| MIR9-3HG  | 15q26. 1   | -0. 219132509 | 0. 003207 | 0. 009955 |
| CACNA1A   | 19p13. 13  | -0. 219117862 | 0. 003209 | 0. 009959 |
| ARHGAP21  | 10p12. 1 1 | 0. 21911577   | 0. 003209 | 0. 009959 |
| CDC123    | 10p14-p15  | 0. 2190802    | 0. 003215 | 0. 009974 |
| SUN1      | 7p22. 3    | 0. 219057184  | 0. 003218 | 0. 009982 |
| TEDC2     | 16p13. 3   | 0. 219050907  | 0. 003219 | 0. 009983 |
| NCOA2     | 8q13. 3    | -0. 219040445 | 0. 00322  | 0. 009987 |
| TRIM33    | 1p13. 2    | -0. 219019522 | 0. 003223 | 0. 009994 |
| MTHFD2L   | 4q13. 3    | -0. 218992321 | 0. 003227 | 0. 010005 |
| ZNF321P   | 19q13. 41  | 0. 218983952  | 0. 003228 | 0. 010007 |
| GTSE1     | 22q13. 31  | 0. 218952566  | 0. 003233 | 0. 01002  |
| UCK1      | 9q34. 13   | -0. 21893792  | 0. 003235 | 0. 010025 |
| NTHL1     | 16p13. 3   | 0. 218904442  | 0. 00324  | 0. 010038 |
| ERICH1    | 8p23. 3    | 0. 218879334  | 0. 003243 | 0. 010048 |
| ZNF721    | 4p16. 3    | -0. 218864687 | 0. 003246 | 0. 010052 |
| CNOT7     | 8p22       | -0. 218862595 | 0. 003246 | 0. 010052 |
| NAPB      | 20p11. 21  | -0. 218850041 | 0. 003248 | 0. 010056 |
| TP53BP1   | 15q15. 3   | -0. 218843764 | 0. 003249 | 0. 010057 |
| MOK       | 14q32. 31  | 0. 218827025  | 0. 003251 | 0. 010063 |
| MTOR      | 1p36. 22   | -0. 218814471 | 0. 003253 | 0. 010067 |
| HSD11B1   | 1q32. 2    | -0. 21871613  | 0. 003267 | 0. 01011  |
| MMP8      | 11q22. 2   | 0. 218694617  | 0. 00327  | 0. 010118 |
| C1QBP     | 17p13. 2   | -0. 218676375 | 0. 003273 | 0. 010125 |
| PRPF31    | 19q13. 42  | 0. 218663821  | 0. 003275 | 0. 010128 |
| HCG4      | 6p22. 1    | 0. 218661729  | 0. 003275 | 0. 010128 |
| HIST1H2AJ | 6p22. 1    | 0. 218632249  | 0. 003279 | 0. 01014  |
| AP4S1     | 14q12      | -0. 218626159 | 0. 00328  | 0. 010141 |
| KCNS1     | 20q13. 12  | 0. 218591046  | 0. 003285 | 0. 010155 |
| MBOAT4    | 8p12       | -0. 218578034 | 0. 003287 | 0. 01016  |
| ADGRG1    | 16q21      | 0. 218571757  | 0. 003288 | 0. 010161 |
| BCKDK     | 16p11. 2   | 0. 218567573  | 0. 003289 | 0. 010161 |
| CDC16     | 13q34      | 0. 21856548   | 0. 003289 | 0. 010161 |
| LMAN2     | 5q35. 3    | 0. 218550834  | 0. 003291 | 0. 010166 |
| ATP6AP2   | Xp11. 4    | -0. 218536187 | 0. 003293 | 0. 010171 |
| ARHGEF11  | 1q23. 1    | -0. 218521541 | 0. 003296 | 0. 010176 |
| VDAC2     | 10q22. 2   | 0. 218511079  | 0. 003297 | 0. 010179 |
| EWSAT1    | 15q23      | -0. 218497477 | 0. 003299 | 0. 010183 |
| EID2B     | 19q13. 2   | -0. 218452493 | 0. 003306 | 0. 010202 |
| PRRG3     | Xq28       | -0. 218437657 | 0. 003308 | 0. 010207 |
| ROR2      | 9q22. 31   | -0. 218416923 | 0. 003311 | 0. 010215 |



|           |            |               |           |           |
|-----------|------------|---------------|-----------|-----------|
| CLCA4     | 1p22. 3    | 0. 218411314  | 0. 003312 | 0. 010216 |
| EIF2B2    | 14q24. 3   | 0. 218393907  | 0. 003314 | 0. 010223 |
| XKR7      | 20q11. 21  | -0. 218389068 | 0. 003315 | 0. 010223 |
| ABI2      | 2q33. 2    | -0. 218381353 | 0. 003316 | 0. 010225 |
| TMC04     | 1p36. 13   | 0. 218362522  | 0. 003319 | 0. 010232 |
| NMUR2     | 5q33. 1    | 0. 218345514  | 0. 003321 | 0. 010238 |
| AP5S1     | 20p13      | -0. 218337413 | 0. 003323 | 0. 01024  |
| CLN8      | 8p23. 3    | -0. 218335321 | 0. 003323 | 0. 01024  |
| MTHFSD    | 16q24. 1   | 0. 218289289  | 0. 00333  | 0. 010258 |
| ANKRD6    | 6q15       | -0. 218289289 | 0. 00333  | 0. 010258 |
| PDE1A     | 2q32. 1    | -0. 218283012 | 0. 003331 | 0. 010259 |
| ZNF599    | 19q13. 11  | -0. 218230703 | 0. 003338 | 0. 010281 |
| JADE3     | Xp11. 3    | -0. 218216057 | 0. 003341 | 0. 010286 |
| ESRRB     | 14q24. 3   | -0. 218209895 | 0. 003341 | 0. 010287 |
| PI4K2A    | 10q24. 2   | -0. 218186764 | 0. 003345 | 0. 010296 |
| DLG5      | 10q22. 3   | 0. 218170025  | 0. 003347 | 0. 010303 |
| KCTD8     | 4p13       | -0. 218110344 | 0. 003356 | 0. 010328 |
| LRRC37A4F | 17q21. 31  | -0. 218090515 | 0. 003359 | 0. 010336 |
| MFAP3L    | 4q33       | -0. 218057038 | 0. 003364 | 0. 01035  |
| PTGDR2    | 11q12. 2   | -0. 217973343 | 0. 003377 | 0. 010386 |
| NUF2      | 1q23. 3    | 0. 217948235  | 0. 003381 | 0. 010395 |
| C10ORF12C | 10q26. 13  | -0. 2179469   | 0. 003381 | 0. 010395 |
| APH1B     | 15q22. 2   | -0. 217941958 | 0. 003381 | 0. 010396 |
| BCKDHB    | 6q14. 1    | -0. 217931496 | 0. 003383 | 0. 010397 |
| ADCY5     | 3q21. 1    | -0. 217927312 | 0. 003384 | 0. 010397 |
| FABP1     | 2p11. 2    | 0. 217926655  | 0. 003384 | 0. 010397 |
| TRMT10B   | 9p13. 2    | -0. 217925219 | 0. 003384 | 0. 010397 |
| HELB      | 12q14. 3 1 | -0. 217900111 | 0. 003388 | 0. 010407 |
| SLC16A11  | 17p13. 1   | -0. 21784571  | 0. 003396 | 0. 010431 |
| PIGS      | 17q11. 2   | 0. 217835248  | 0. 003397 | 0. 010434 |
| MAK       | 6p24. 2    | -0. 217805955 | 0. 003402 | 0. 010446 |
| COX4I1    | 16q24. 1   | 0. 2177662    | 0. 003408 | 0. 010463 |
| GADL1     | 3p24. 1-p2 | -0. 217689535 | 0. 00342  | 0. 010497 |
| STARD3    | 17q12      | 0. 217678321  | 0. 003421 | 0. 010501 |
| MBOAT7    | 19q13. 42  | 0. 217663675  | 0. 003423 | 0. 010506 |
| B3GNT5    | 3q27. 1    | 0. 21765949   | 0. 003424 | 0. 010506 |
| CLU       | 8p21. 1    | -0. 217638566 | 0. 003427 | 0. 010514 |
| MYORG     | 9p13. 3    | 0. 217600904  | 0. 003433 | 0. 01053  |
| SNAI3-AS1 | 16q24. 2   | -0. 217582073 | 0. 003436 | 0. 010537 |
| GLB1L2    | 11q25      | 0. 217571611  | 0. 003437 | 0. 010541 |
| NEUROD1   | 2q31. 3    | -0. 217558855 | 0. 003439 | 0. 010545 |
| FYB1      | 5p13. 1    | -0. 21755278  | 0. 00344  | 0. 010545 |
| KCNU1     | 8p11. 23   | -0. 217552208 | 0. 00344  | 0. 010545 |
| ATP5P0    | 21q22. 11  | 0. 217540226  | 0. 003442 | 0. 010549 |
| DUSP10    | 1q41       | 0. 217533948  | 0. 003443 | 0. 01055  |
| SRSF7     | 2p22. 1    | 0. 217523487  | 0. 003445 | 0. 010553 |
| CLNK      | 4p16. 1    | -0. 217515275 | 0. 003446 | 0. 010556 |
| FAM133CP  | 10q21. 1   | -0. 217485824 | 0. 00345  | 0. 010568 |
| RBM27     | 5q32       | -0. 217471178 | 0. 003453 | 0. 010573 |
| SOX6      | 11p15. 2   | -0. 217466993 | 0. 003453 | 0. 010573 |
| POLDIP2   | 17q11. 2   | 0. 2174377    | 0. 003458 | 0. 010585 |
| NAA80     | 3p21. 31   | 0. 217400038  | 0. 003464 | 0. 010601 |
| N4BP2L2-1 | 13q13. 1   | 0. 217377022  | 0. 003467 | 0. 010611 |
| ESYT3     | 3q22. 3    | 0. 217341452  | 0. 003473 | 0. 010626 |

|          |            |               |           |           |
|----------|------------|---------------|-----------|-----------|
| EI24     | 11q24. 2   | 0. 217312159  | 0. 003477 | 0. 010638 |
| SCN2A    | 2q24. 3    | -0. 217247296 | 0. 003487 | 0. 010667 |
| DYNLL2   | 17q22      | -0. 21721591  | 0. 003492 | 0. 01068  |
| DHX36    | 3q25. 2    | -0. 217190802 | 0. 003496 | 0. 01069  |
| SYPL1    | 7q22. 3    | 0. 217092461  | 0. 003511 | 0. 010734 |
| DAAM2    | 6p21. 2    | -0. 217090369 | 0. 003511 | 0. 010734 |
| C10RF174 | 1p36. 32   | 0. 217088277  | 0. 003512 | 0. 010734 |
| PMS1     | 2q32. 2    | -0. 217067353 | 0. 003515 | 0. 010742 |
| PSMG2    | 18p11. 21  | 0. 217042245  | 0. 003519 | 0. 010752 |
| KLF16    | 19p13. 3   | 0. 217033875  | 0. 00352  | 0. 010755 |
| KRBOX4   | Xp11. 3    | -0. 217029691 | 0. 003521 | 0. 010755 |
| YRDC     | 1p34. 3    | -0. 217023413 | 0. 003522 | 0. 010755 |
| NTN3     | 16p13. 3   | -0. 2170208   | 0. 003522 | 0. 010755 |
| CEP135   | 4q12       | -0. 217019229 | 0. 003522 | 0. 010755 |
| COMMD1   | 2p15       | 0. 217006675  | 0. 003524 | 0. 010759 |
| KLF15    | 3q21. 3    | -0. 217000398 | 0. 003525 | 0. 010761 |
| EVPLL    | 17p11. 2   | 0. 216958467  | 0. 003532 | 0. 010779 |
| FAM24B   | 10q26. 13  | 0. 216918796  | 0. 003538 | 0. 010796 |
| APOO     | Xp22. 11   | -0. 216883226 | 0. 003544 | 0. 010812 |
| AARD     | 8q24. 11   | -0. 216853933 | 0. 003548 | 0. 010824 |
| GJA8     | 1q21. 2    | -0. 216818646 | 0. 003554 | 0. 010837 |
| LRRC75B  | 22q11. 23  | 0. 216816384  | 0. 003554 | 0. 010837 |
| PPWD1    | 5q12. 3    | -0. 216814178 | 0. 003554 | 0. 010837 |
| CERS2    | 1q21. 3    | 0. 216812085  | 0. 003555 | 0. 010837 |
| MAFK     | 7p22. 3    | 0. 216797439  | 0. 003557 | 0. 010843 |
| SLC01B1  | 12p12. 1   | 0. 216777988  | 0. 00356  | 0. 01085  |
| SNORA11E | Xp11. 22   | -0. 216757674 | 0. 003563 | 0. 010858 |
| AIDA     | 1q41       | 0. 216751407  | 0. 003564 | 0. 01086  |
| PEX1     | 7q21. 2    | -0. 216740945 | 0. 003566 | 0. 010863 |
| SYNE3    | 14q32. 13  | -0. 216705375 | 0. 003572 | 0. 010879 |
| RPP38-DT | 10p13      | -0. 216697006 | 0. 003573 | 0. 010881 |
| ACBD4    | 17q21. 31  | 0. 216667713  | 0. 003578 | 0. 010891 |
| NOP58    | 2q33. 1    | 0. 216667713  | 0. 003578 | 0. 010891 |
| EPDR1    | 7p14. 1    | 0. 21666562   | 0. 003578 | 0. 010891 |
| HDC      | 15q21. 2   | -0. 216636327 | 0. 003582 | 0. 010903 |
| WFDC13   | 20q13. 12  | 0. 216626286  | 0. 003584 | 0. 010907 |
| FYTTD1   | 3q29       | -0. 216611219 | 0. 003586 | 0. 010912 |
| ILK      | 11p15. 4   | 0. 216462662  | 0. 00361  | 0. 010981 |
| GMPS     | 3q25. 31   | 0. 216462662  | 0. 00361  | 0. 010981 |
| CEACAM18 | 19q13. 41  | 0. 216431606  | 0. 003615 | 0. 010994 |
| CEP290   | 12q21. 32  | -0. 216427092 | 0. 003616 | 0. 010994 |
| FUNDC2P2 | 2p11. 2    | -0. 216407736 | 0. 003619 | 0. 011002 |
| FGF14    | 13q33. 1   | -0. 216387337 | 0. 003622 | 0. 01101  |
| RGMA     | 15q26. 1   | -0. 216383152 | 0. 003623 | 0. 011011 |
| PPP3CA   | 4q24       | 0. 216372691  | 0. 003624 | 0. 011014 |
| FLT3     | 13q12. 2   | -0. 216354312 | 0. 003627 | 0. 011021 |
| SEC22B   | 1p12       | -0. 216303643 | 0. 003635 | 0. 011044 |
| RSC1A1   | 1p36. 21   | -0. 216291089 | 0. 003637 | 0. 011049 |
| SPATA6L  | 9p24. 2-p2 | 0. 216268073  | 0. 003641 | 0. 011058 |
| VAMP7    | Xq28 and   | -0. 216259703 | 0. 003642 | 0. 011061 |
| SLC25A24 | 1p13. 3    | 0. 216242964  | 0. 003645 | 0. 011067 |
| PTPRT    | 20q12-q13  | -0. 216206461 | 0. 003651 | 0. 011083 |
| FBXL21P  | 5q31. 1    | -0. 216198696 | 0. 003652 | 0. 011085 |
| FRMPD2   | 10q11. 22  | -0. 216172101 | 0. 003657 | 0. 011097 |

|           |            |               |           |           |
|-----------|------------|---------------|-----------|-----------|
| SLC25A29  | 14q32. 2   | 0. 21616764   | 0. 003657 | 0. 011097 |
| FAM71F1   | 7q32. 1    | -0. 216163544 | 0. 003658 | 0. 011097 |
| ATP5MF    | 7q22. 1    | 0. 21615927   | 0. 003659 | 0. 011097 |
| ATP1A3    | 19q13. 2   | -0. 216155085 | 0. 003659 | 0. 011097 |
| MXRA8     | 1p36. 33   | 0. 216155085  | 0. 003659 | 0. 011097 |
| PARP1     | 1q42. 12   | -0. 216138347 | 0. 003662 | 0. 011103 |
| BAALC     | 8q22. 3    | -0. 216121608 | 0. 003665 | 0. 011108 |
| CDH18     | 5p14. 3    | -0. 216121468 | 0. 003665 | 0. 011108 |
| ARHGAP44  | 17p12      | -0. 216094407 | 0. 003669 | 0. 011119 |
| MACF1     | 1p34. 3    | -0. 216090222 | 0. 00367  | 0. 01112  |
| FSCN2     | 17q25. 3   | 0. 216044191  | 0. 003677 | 0. 011141 |
| DDI1      | 11q22. 3   | -0. 216013824 | 0. 003682 | 0. 011154 |
| SIPA1     | 11q13. 1   | 0. 216006528  | 0. 003683 | 0. 011156 |
| GIGYF2    | 2q37. 1    | -0. 215987697 | 0. 003686 | 0. 011163 |
| SLC6A10P  | 16p11. 2   | 0. 215946302  | 0. 003693 | 0. 011182 |
| LRP11     | 6q25. 1    | -0. 215922834 | 0. 003697 | 0. 011192 |
| ZNF430    | 19p12      | -0. 215908187 | 0. 003699 | 0. 011197 |
| ZNRD1     | 6p22. 1    | 0. 215899818  | 0. 003701 | 0. 011199 |
| CHPF      | 2q35       | 0. 215897726  | 0. 003701 | 0. 011199 |
| ZNF484    | 9q22. 31   | -0. 215889356 | 0. 003702 | 0. 011202 |
| MFSD14A   | 1p21. 2    | -0. 215878894 | 0. 003704 | 0. 011205 |
| DNAJC4    | 11q13. 1   | 0. 215837047  | 0. 003711 | 0. 011224 |
| MRTFA     | 22q13. 1-c | 0. 21580357   | 0. 003716 | 0. 011239 |
| CD84      | 1q23. 3    | -0. 215788923 | 0. 003719 | 0. 011244 |
| HDAC5     | 17q21. 31  | -0. 215776369 | 0. 003721 | 0. 011247 |
| VAMP3     | 1p36. 23   | 0. 215776369  | 0. 003721 | 0. 011247 |
| HHIP      | 4q31. 21   | 0. 215744984  | 0. 003726 | 0. 011261 |
| AJUBA     | 14q11. 2   | 0. 215717783  | 0. 00373  | 0. 011273 |
| GJA5      | 1q21. 2    | -0. 215713598 | 0. 003731 | 0. 011273 |
| PGAP2     | 11p15. 4   | 0. 215667566  | 0. 003739 | 0. 011294 |
| KTN1-AS1  | 14q22. 3   | -0. 215657217 | 0. 00374  | 0. 011298 |
| SHLD1     | 20p12. 3   | -0. 215648848 | 0. 003742 | 0. 0113   |
| TRAPPC2B  | 19q13. 43  | 0. 215636181  | 0. 003744 | 0. 011305 |
| PCGF2     | 17q12      | 0. 215596426  | 0. 00375  | 0. 011322 |
| C5ORF49   | 5p15. 31   | -0. 215594334 | 0. 003751 | 0. 011322 |
| SCARNA6   | 2q37. 1    | 0. 215581233  | 0. 003753 | 0. 011327 |
| RPL36     | 19p13. 3   | 0. 215575503  | 0. 003754 | 0. 011328 |
| MRPL57    | 13q12. 11  | 0. 215535748  | 0. 00376  | 0. 011346 |
| TRMT1     | 19p13. 13  | 0. 215529471  | 0. 003761 | 0. 011347 |
| HEATR3    | 16q12. 1   | -0. 215514824 | 0. 003764 | 0. 011353 |
| SUGT1P1   | 9p13. 3    | -0. 215493048 | 0. 003767 | 0. 011362 |
| SOCS4     | 14q22. 3   | -0. 21547507  | 0. 00377  | 0. 011369 |
| CASP12    | 11q22. 3   | -0. 215465579 | 0. 003772 | 0. 011372 |
| HIST1H4H  | 6p22. 2    | 0. 215432289  | 0. 003777 | 0. 011387 |
| LEP       | 7q32. 1    | -0. 215372443 | 0. 003787 | 0. 011416 |
| ZDHHC9    | Xq26. 1    | 0. 215368359  | 0. 003788 | 0. 011416 |
| ATP6V1G1  | 9q32       | -0. 215343251 | 0. 003792 | 0. 011427 |
| PRIM1     | 12q13. 3   | -0. 215328605 | 0. 003795 | 0. 011432 |
| ADAM22    | 7q21. 12   | -0. 215322328 | 0. 003796 | 0. 011434 |
| PRADC1    | 2p13. 2    | -0. 215309773 | 0. 003798 | 0. 011438 |
| LINC00899 | 22q13. 31  | 0. 215251187  | 0. 003807 | 0. 011466 |
| LINC01278 | Xq11. 1    | -0. 215240726 | 0. 003809 | 0. 01147  |
| ZNF787    | 19q13. 43  | 0. 215194694  | 0. 003817 | 0. 011491 |
| PLCB4     | 20p12. 3-f | -0. 215161216 | 0. 003823 | 0. 011506 |

|           |           |              |          |          |
|-----------|-----------|--------------|----------|----------|
| OR3A2     | 17p13.3   | -0.21515483  | 0.003824 | 0.011508 |
| MINAR1    | 15q25.1   | -0.215136108 | 0.003827 | 0.011515 |
| ASPA      | 17p13.2   | -0.215129831 | 0.003828 | 0.011515 |
| STX17     | 9q31.1    | -0.215129831 | 0.003828 | 0.011515 |
| ACAD9     | 3q21.3    | 0.215117277  | 0.00383  | 0.01152  |
| MTMR6     | 13q12.13  | -0.215106815 | 0.003832 | 0.011523 |
| CTSO      | 4q32.1    | -0.215085891 | 0.003835 | 0.011532 |
| CXCR6     | 3p21.31   | -0.215081707 | 0.003836 | 0.011532 |
| RNF212    | 4p16.3    | -0.215077522 | 0.003837 | 0.011533 |
| POLM      | 7p13      | 0.215033582  | 0.003844 | 0.011553 |
| IZUM01    | 19q13.33  | -0.21502528  | 0.003845 | 0.011556 |
| PCDH18    | 4q28.3    | -0.21499592  | 0.00385  | 0.011569 |
| F10       | 13q34     | -0.214914318 | 0.003864 | 0.011608 |
| SHROOM3   | 4q21.1    | 0.214878748  | 0.00387  | 0.011625 |
| ACOT13    | 6p22.3    | -0.214866194 | 0.003872 | 0.011629 |
| ROB01     | 3p12.3    | -0.21484527  | 0.003876 | 0.011638 |
| GUF1      | 4p12      | -0.214843178 | 0.003876 | 0.011638 |
| CACNA1G   | 17q21.33  | -0.2148097   | 0.003882 | 0.011653 |
| ZNF529    | 19q13.12  | -0.214805515 | 0.003883 | 0.011653 |
| POLR1B    | 2q14.1    | -0.214797146 | 0.003884 | 0.011654 |
| SEC62     | 3q26.2    | -0.214795054 | 0.003884 | 0.011654 |
| C10RF112  | 1q24.2    | 0.214790869  | 0.003885 | 0.011654 |
| TTC25     | 17q21.2   | -0.214789935 | 0.003885 | 0.011654 |
| PBX1      | 1q23.3    | -0.2147825   | 0.003886 | 0.011656 |
| RUFY1     | 5q35.3    | 0.21477413   | 0.003888 | 0.011657 |
| NPSR1-AS1 | 17p14.3   | 0.21477367   | 0.003888 | 0.011657 |
| CHGB      | 20p12.3   | -0.214705082 | 0.0039   | 0.011691 |
| MRPL24    | 1q23.1    | 0.214646496  | 0.00391  | 0.011719 |
| PNPLA1    | 6p21.31   | 0.214641399  | 0.00391  | 0.01172  |
| CDC42BPB  | 14q32.32  | 0.214606742  | 0.003916 | 0.011734 |
| FUZ       | 19q13.33  | 0.214604649  | 0.003917 | 0.011734 |
| CAAP1     | 9p21.2    | -0.214602557 | 0.003917 | 0.011734 |
| ORC2      | 2q33.1    | 0.214504216  | 0.003934 | 0.011783 |
| CCNA2     | 4q27      | 0.214464461  | 0.003941 | 0.011802 |
| STIM1     | 11p15.4   | -0.214430984 | 0.003947 | 0.011817 |
| SLC01B7   | 12p12.2   | 0.214405006  | 0.003951 | 0.011829 |
| SCN7A     | 2q24.3    | -0.214384018 | 0.003955 | 0.011838 |
| TNXB      | 6p21.33-1 | -0.214380767 | 0.003955 | 0.011838 |
| PCDHA2    | 5q31.3    | -0.214345496 | 0.003961 | 0.011854 |
| NSMCE1    | 16p12.1   | 0.21433055   | 0.003964 | 0.01186  |
| LINC00028 | 20q11.21  | -0.214314325 | 0.003967 | 0.011867 |
| FKBP8     | 19p13.11  | 0.214290796  | 0.003971 | 0.011878 |
| WDR18     | 19p13.3   | 0.214282426  | 0.003972 | 0.01188  |
| CCDC78    | 16p13.3   | 0.214278242  | 0.003973 | 0.01188  |
| BREA2     | 8q24.3    | 0.214250331  | 0.003978 | 0.011893 |
| UBE2QL1   | 5p15.31   | -0.214238487 | 0.00398  | 0.011898 |
| KIAA1614  | 1q25.3    | -0.214230117 | 0.003981 | 0.011898 |
| SLC6A12   | 12p13.33  | 0.214230117  | 0.003981 | 0.011898 |
| ROB03     | 11q24.2   | 0.214219656  | 0.003983 | 0.0119   |
| MSH5      | 6p21.33   | 0.214219656  | 0.003983 | 0.0119   |
| LINC00294 | 11p13     | -0.214192455 | 0.003988 | 0.011913 |
| PLCD1     | 3p22.2    | 0.214175716  | 0.003991 | 0.011919 |
| ARHGAP23  | 17q12     | 0.214131777  | 0.003999 | 0.011941 |
| PROX2     | 14q24.3   | -0.214068102 | 0.00401  | 0.011972 |

|           |              |               |           |           |
|-----------|--------------|---------------|-----------|-----------|
| IL17A     | 6p12. 2      | -0. 214050447 | 0. 004013 | 0. 011979 |
| MGC2889   | 3q29         | -0. 21398243  | 0. 004025 | 0. 012013 |
| CAP2      | 6p22. 3      | -0. 213970665 | 0. 004027 | 0. 012018 |
| KCNG1     | 20q13. 13    | -0. 213949854 | 0. 00403  | 0. 012027 |
| PHLDA1    | 12q21. 2     | 0. 213943465  | 0. 004031 | 0. 012028 |
| ERCC6     | 10q11. 23    | -0. 213905802 | 0. 004038 | 0. 012046 |
| XKR8      | 1p35. 3      | -0. 213893248 | 0. 00404  | 0. 012051 |
| SLC8A2    | 19q13. 32    | -0. 213890221 | 0. 004041 | 0. 012051 |
| LDB1      | 10q24. 32    | -0. 213886971 | 0. 004041 | 0. 012051 |
| RPS6KC1   | 1q32. 3      | -0. 213882786 | 0. 004042 | 0. 012051 |
| ZNF536    | 19q12        | -0. 213802163 | 0. 004056 | 0. 012092 |
| LYRM1     | 16p12. 3     | -0. 213730044 | 0. 004069 | 0. 012128 |
| KMT5C     | 19q13. 42    | 0. 213691447  | 0. 004076 | 0. 012147 |
| GMPPA     | 2q35         | 0. 213675643  | 0. 004079 | 0. 012152 |
| RDH11     | 14q24. 1     | -0. 213673551 | 0. 004079 | 0. 012152 |
| CHCHD1    | 10q22. 2     | 0. 213671458  | 0. 00408  | 0. 012152 |
| NUP37     | 12q23. 2     | 0. 213656812  | 0. 004082 | 0. 012158 |
| NBDY      | Xp11. 21     | 0. 213642165  | 0. 004085 | 0. 012164 |
| SMIM1     | 1p36. 32     | 0. 21363798   | 0. 004085 | 0. 012164 |
| SYNCRIP   | 6q14. 3      | -0. 213568933 | 0. 004098 | 0. 012199 |
| METTL11B  | 1q24. 2      | 0. 213511969  | 0. 004108 | 0. 012227 |
| PDE6B     | 4p16. 3      | -0. 21350407  | 0. 004109 | 0. 01223  |
| FDPSP2    | 7q11. 23     | 0. 213491739  | 0. 004112 | 0. 012234 |
| CCZ1      | 7p22. 1      | 0. 213487331  | 0. 004112 | 0. 012235 |
| GMNC      | 3q28         | -0. 213467259 | 0. 004116 | 0. 012244 |
| MINK1     | 17p13. 2     | -0. 21338899  | 0. 00413  | 0. 012284 |
| UPB1      | 22q11. 23    | -0. 213335356 | 0. 00414  | 0. 012311 |
| C14ORF178 | 14q24. 3     | -0. 213259686 | 0. 004153 | 0. 012349 |
| ATXN1L    | 16q22. 2     | -0. 21323834  | 0. 004157 | 0. 012359 |
| FABP4     | 8q21. 13     | -0. 213232063 | 0. 004158 | 0. 01236  |
| ZBED9     | 6p22. 1      | -0. 213228325 | 0. 004159 | 0. 012361 |
| STRIP1    | 1p13. 3      | -0. 213215324 | 0. 004161 | 0. 012363 |
| UBQLN1    | 9q21. 32   c | -0. 213215324 | 0. 004161 | 0. 012363 |
| SRPX      | Xp11. 4      | -0. 213213232 | 0. 004162 | 0. 012363 |
| KIAA0895  | 7p14. 2      | -0. 213177662 | 0. 004168 | 0. 01238  |
| RGL4      | 22q11. 23    | -0. 2131672   | 0. 00417  | 0. 012384 |
| MFAP4     | 17p11. 2     | -0. 213127445 | 0. 004177 | 0. 012404 |
| MTSS1     | 8q24. 13     | -0. 213121168 | 0. 004178 | 0. 012405 |
| C3ORF35   | 3p22. 2      | 0. 213108614  | 0. 004181 | 0. 01241  |
| CCL8      | 17q12        | -0. 213063028 | 0. 004189 | 0. 012433 |
| PLCXD3    | 5p13. 1      | -0. 213037474 | 0. 004194 | 0. 012445 |
| SMARCA1   | Xq25-q26.    | -0. 213010273 | 0. 004199 | 0. 012458 |
| NOP9      | 14q12        | -0. 212994692 | 0. 004201 | 0. 012464 |
| CIDECP1   | 3p25. 3      | 0. 212985277  | 0. 004203 | 0. 012468 |
| HUNK      | 21q22. 11    | -0. 212934949 | 0. 004212 | 0. 012491 |
| TRAPPC5   | 19p13. 2     | 0. 212934949  | 0. 004212 | 0. 012491 |
| HOXB1     | 17q21. 32    | 0. 212931927  | 0. 004213 | 0. 012491 |
| PRDX6     | 1q25. 1      | 0. 212928783  | 0. 004213 | 0. 012491 |
| CA7       | 16q22. 1     | 0. 212916942  | 0. 004216 | 0. 012495 |
| CCR2      | 3p21. 31     | -0. 212903563 | 0. 004218 | 0. 0125   |
| IL1B      | 2q14. 1      | -0. 212901471 | 0. 004218 | 0. 0125   |
| FCN2      | 9q34. 3      | -0. 212891234 | 0. 00422  | 0. 012504 |
| RUFY3     | 4q13. 3      | -0. 212880547 | 0. 004222 | 0. 012507 |
| RCSD1     | 1q24. 2      | -0. 212878455 | 0. 004223 | 0. 012507 |

|          |            |               |           |           |
|----------|------------|---------------|-----------|-----------|
| CD300E   | 17q25. 1   | -0. 212858855 | 0. 004226 | 0. 012516 |
| AREL1    | 14q24. 3   | -0. 2128387   | 0. 00423  | 0. 012525 |
| GLG1     | 16q23. 1   | -0. 212801038 | 0. 004237 | 0. 012544 |
| LRRC66   | 4q12       | 0. 212792668  | 0. 004238 | 0. 012546 |
| UBQLN2   | Xp11. 21   | -0. 212746637 | 0. 004247 | 0. 012569 |
| KLF4     | 9q31. 2    | 0. 212704789  | 0. 004255 | 0. 01259  |
| PSRC1    | 1p13. 3    | 0. 212700605  | 0. 004255 | 0. 012591 |
| DAW1     | 2q36. 3    | 0. 212664531  | 0. 004262 | 0. 012608 |
| DPCD     | 10q24. 32  | 0. 212662942  | 0. 004262 | 0. 012608 |
| NCAM2    | 21q21. 1   | -0. 212656665 | 0. 004263 | 0. 012609 |
| RPL7     | 8q21. 11   | -0. 212621095 | 0. 00427  | 0. 012627 |
| CYB5R4   | 6q14. 2    | -0. 21258134  | 0. 004277 | 0. 012647 |
| NPTX1    | 17q25. 3   | 0. 212575063  | 0. 004279 | 0. 012648 |
| PSMA4    | 15q25. 1   | 0. 212547863  | 0. 004284 | 0. 012661 |
| NCAN     | 19p13. 11  | -0. 212531787 | 0. 004287 | 0. 012668 |
| SYNJ2BP  | 14q24. 2   | -0. 212512293 | 0. 00429  | 0. 012677 |
| GOLGA1   | 9q33. 3    | -0. 212489277 | 0. 004294 | 0. 012688 |
| RACGAP1P | 12q12      | 0. 21246783   | 0. 004298 | 0. 012698 |
| BHLHE22  | 8q12. 3    | -0. 212464168 | 0. 004299 | 0. 012698 |
| ARMC12   | 6p21. 31   | -0. 212457133 | 0. 0043   | 0. 0127   |
| USP36    | 17q25. 3   | -0. 212453707 | 0. 004301 | 0. 0127   |
| ZAN      | 7q22. 1    | -0. 212442914 | 0. 004303 | 0. 012704 |
| ZCCHC8   | 12q24. 31  | -0. 21243906  | 0. 004304 | 0. 012704 |
| DNAI1    | 9p13. 3    | -0. 212431536 | 0. 004305 | 0. 012706 |
| DHX29    | 5q11. 2    | -0. 212420229 | 0. 004307 | 0. 012711 |
| PRTG     | 15q21. 3   | -0. 212382566 | 0. 004314 | 0. 01273  |
| CLEC4E   | 12p13. 31  | -0. 212353273 | 0. 00432  | 0. 012744 |
| TBX4     | 17q23. 2   | 0. 212348264  | 0. 004321 | 0. 012745 |
| CPLANE2  | 1p36. 13   | -0. 21232398  | 0. 004325 | 0. 012756 |
| PRKCB    | 16p12. 2-1 | -0. 212298872 | 0. 00433  | 0. 012767 |
| C2ORF48  | 2p25. 1    | 0. 212297451  | 0. 00433  | 0. 012767 |
| HIPK1    | 1p13. 2    | -0. 212265395 | 0. 004336 | 0. 012783 |
| MIGA1    | 1p31. 1    | -0. 212250748 | 0. 004339 | 0. 012787 |
| MS4A7    | 11q12. 2   | -0. 212250748 | 0. 004339 | 0. 012787 |
| KCNC3    | 19q13. 33  | -0. 212206809 | 0. 004347 | 0. 01281  |
| RCOR1    | 14q32. 31- | 0. 212173331  | 0. 004354 | 0. 012827 |
| PNMA3    | Xq28       | -0. 21216959  | 0. 004354 | 0. 012827 |
| NLGN2    | 17p13. 1   | -0. 212164961 | 0. 004355 | 0. 012827 |
| SCAMP1   | 5q14. 1    | -0. 212158684 | 0. 004356 | 0. 012829 |
| SAAL1    | 11p15. 1   | 0. 212127299  | 0. 004362 | 0. 012845 |
| RBBP7    | Xp22. 2    | 0. 212095914  | 0. 004368 | 0. 01286  |
| PGAM1    | 10q24. 1   | 0. 212083359  | 0. 004371 | 0. 012865 |
| FOXB1    | 15q22. 2   | -0. 212073055 | 0. 004373 | 0. 012869 |
| B4GALNT4 | 11p15. 5   | -0. 212062436 | 0. 004375 | 0. 012873 |
| SLC19A2  | 1q24. 2    | -0. 212047789 | 0. 004377 | 0. 012879 |
| SRP54    | 14q13. 2   | -0. 212037328 | 0. 004379 | 0. 012883 |
| DYNC1I1  | 7q21. 3    | -0. 212020589 | 0. 004382 | 0. 012891 |
| HTR7P1   | 12p13. 1   | -0. 211997573 | 0. 004387 | 0. 012902 |
| GSDMC    | 8q24. 21   | 0. 211956883  | 0. 004395 | 0. 012922 |
| CCNI     | 4q21. 1    | -0. 211949449 | 0. 004396 | 0. 012925 |
| GATC     | 12q24. 31  | -0. 211936895 | 0. 004398 | 0. 01293  |
| PTPN13   | 4q21. 3    | -0. 21193271  | 0. 004399 | 0. 01293  |
| KRIT1    | 7q21. 2    | -0. 211905509 | 0. 004404 | 0. 012943 |
| C6ORF141 | 6p12. 3    | 0. 211901324  | 0. 004405 | 0. 012943 |

|            |            |              |          |          |
|------------|------------|--------------|----------|----------|
| ULK4       | 3p22.1     | -0.211899232 | 0.004405 | 0.012943 |
| ARIH2      | 3p21.31    | -0.211890863 | 0.004407 | 0.012946 |
| FRMPD1     | 9p13.2     | -0.211880552 | 0.004409 | 0.01295  |
| G3BP2      | 4q21.1     | -0.21186157  | 0.004413 | 0.012959 |
| TRPC7      | 5q31.1     | -0.211856969 | 0.004414 | 0.012959 |
| BTAF1      | 10q23.32   | -0.211846923 | 0.004415 | 0.012963 |
| GNRH2      | 20p13      | -0.211820306 | 0.004421 | 0.012976 |
| CRMP1      | 4p16.2     | -0.211792522 | 0.004426 | 0.01299  |
| HCFC1      | Xq28       | -0.211738121 | 0.004436 | 0.013016 |
| LOC91450   | 15q24.3    | 0.211738121  | 0.004436 | 0.013016 |
| MRPS34     | 16p13.3    | 0.211719289  | 0.00444  | 0.013023 |
| PCNX4      | 14q23.1    | -0.211719289 | 0.00444  | 0.013023 |
| ARRDC4     | 15q26.2    | -0.211570732 | 0.004468 | 0.013105 |
| CHEK2      | 22q12.1    | 0.211528885  | 0.004476 | 0.013126 |
| GDPGP1     | 15q26.1    | 0.211522608  | 0.004478 | 0.013126 |
| CYP1B1-AS2 | 2p22.2     | -0.211520516 | 0.004478 | 0.013126 |
| ZNF681     | 19p12      | -0.211520516 | 0.004478 | 0.013126 |
| HSDL1      | 16q24.1    | -0.211480761 | 0.004486 | 0.013146 |
| CRIP3      | 6p21.1     | -0.211475407 | 0.004487 | 0.013147 |
| ACAT2      | 6q25.3     | 0.211466114  | 0.004489 | 0.013151 |
| TIMMDC1    | 3q13.33    | 0.211457745  | 0.00449  | 0.013153 |
| SNX4       | 3q21.2     | -0.211455653 | 0.004491 | 0.013153 |
| SP140L     | 2q37.1     | 0.211451468  | 0.004491 | 0.013153 |
| SRA1       | 5q31.3     | 0.211434729  | 0.004495 | 0.013161 |
| GPHN       | 14q23.3-c  | -0.211399159 | 0.004502 | 0.013177 |
| UBXN4      | 2q21.3     | -0.211399159 | 0.004502 | 0.013177 |
| CRISPLD1   | 8q21.13    | -0.211380328 | 0.004505 | 0.013186 |
| CCDC32     | 15q15.1    | 0.211357422  | 0.00451  | 0.013197 |
| RASSF2     | 20p13      | -0.211348942 | 0.004511 | 0.0132   |
| HS6ST2     | Xq26.2     | -0.211344758 | 0.004512 | 0.0132   |
| EBNA1BP2   | 1p34.2     | 0.211336388  | 0.004514 | 0.013203 |
| SPRR2A     | 1q21.3     | 0.211302303  | 0.00452  | 0.013221 |
| C100RF99   | 10q23.1    | 0.2112817    | 0.004524 | 0.01323  |
| TAGLN3     | 3q13.2     | -0.211276152 | 0.004526 | 0.013231 |
| TEN1       | 17q25.1    | 0.211273617  | 0.004526 | 0.013231 |
| NKAPP1     | Xq24       | -0.211252694 | 0.00453  | 0.01324  |
| KIF16B     | 20p12.1    | -0.211250602 | 0.004531 | 0.01324  |
| RNF121     | 11q13.4    | 0.211221309  | 0.004536 | 0.013255 |
| UCK2       | 1q24.1     | 0.211187831  | 0.004543 | 0.013272 |
| DANCR      | 4q12       | -0.211173184 | 0.004546 | 0.013279 |
| CCK        | 3p22.1     | 0.211169048  | 0.004546 | 0.013279 |
| RBBP8NL    | 20q13.33   | 0.211125171  | 0.004555 | 0.013302 |
| GAMT       | 19p13.3    | -0.211099952 | 0.00456  | 0.013313 |
| HLA-A      | 6p22.1     | 0.211099952  | 0.00456  | 0.013313 |
| ACOT8      | 20q13.12   | 0.211076936  | 0.004565 | 0.013323 |
| RBM4B      | 11q13.2    | -0.211074844 | 0.004565 | 0.013323 |
| NDC80      | 18p11.32   | 0.211072862  | 0.004565 | 0.013323 |
| PPP2R1B    | 11q23.1    | -0.211058105 | 0.004568 | 0.013329 |
| ECHDC1     | 6q22.33    | -0.211022535 | 0.004575 | 0.013348 |
| PTPRC      | 1q31.3-q32 | -0.211003703 | 0.004579 | 0.013354 |
| GRIK2      | 6q16.3     | -0.211001611 | 0.004579 | 0.013354 |
| MKMK2      | 19p13.3    | 0.211001611  | 0.004579 | 0.013354 |
| ATP7A      | Xq21.1     | -0.210989057 | 0.004582 | 0.013359 |
| MARS       | 12q13.3    | -0.210959764 | 0.004588 | 0.013371 |

|           |                        |               |           |           |
|-----------|------------------------|---------------|-----------|-----------|
| PLA2G5    | 1p36. 13               | -0. 210959764 | 0. 004588 | 0. 013371 |
| MAGEC3    | Xq27. 2                | -0. 210957804 | 0. 004588 | 0. 013371 |
| IL32      | 16p13. 3               | 0. 210955579  | 0. 004588 | 0. 013371 |
| LRG1      | 19p13. 3               | 0. 21093884   | 0. 004592 | 0. 013378 |
| PRPF4     | 9q32                   | -0. 210888624 | 0. 004602 | 0. 013405 |
| DNAJC25-C | 9q31. 3                | -0. 210883491 | 0. 004603 | 0. 013405 |
| PKD1L1    | 7p12. 3                | -0. 210882898 | 0. 004603 | 0. 013405 |
| DLK2      | 6p21. 1                | -0. 210869793 | 0. 004605 | 0. 01341  |
| SGCD      | 5q33. 2-q <sub>2</sub> | -0. 210859331 | 0. 004607 | 0. 013414 |
| ALDH2     | 12q24. 12              | 0. 210786098  | 0. 004622 | 0. 013455 |
| TMCO6     | 5q31. 3                | 0. 21076099   | 0. 004627 | 0. 013467 |
| MKLN1     | 7q32. 3                | -0. 210740067 | 0. 004631 | 0. 013475 |
| CACNA1H   | 16p13. 3               | -0. 210737974 | 0. 004632 | 0. 013475 |
| L2HGDH    | 14q21. 3               | -0. 210733789 | 0. 004632 | 0. 013475 |
| NOSIP     | 19q13. 33              | 0. 210733789  | 0. 004632 | 0. 013475 |
| OR6A2     | 11p15. 4               | 0. 210731048  | 0. 004633 | 0. 013475 |
| RDX       | 11q22. 3               | -0. 21072542  | 0. 004634 | 0. 013476 |
| C17ORF99  | 17q25. 3               | 0. 210714352  | 0. 004636 | 0. 013481 |
| ADAMTSL1  | 9p22. 2-p <sub>2</sub> | -0. 210706589 | 0. 004638 | 0. 013483 |
| TMEM198   | 2q35                   | -0. 210700312 | 0. 004639 | 0. 013484 |
| USP33     | 1p31. 1                | -0. 210698219 | 0. 00464  | 0. 013484 |
| MGST1     | 12p12. 3               | 0. 210679388  | 0. 004643 | 0. 013493 |
| TRIM14    | 9q22. 33               | 0. 210671019  | 0. 004645 | 0. 013496 |
| ZMYND19   | 9q34. 3                | 0. 210652188  | 0. 004649 | 0. 013505 |
| MANBAL    | 20q11. 23              | 0. 210641726  | 0. 004651 | 0. 013509 |
| EDARADD   | 1q42. 3-q <sub>4</sub> | -0. 210597786 | 0. 00466  | 0. 013533 |
| PPP1R1B   | 17q12                  | 0. 210587325  | 0. 004662 | 0. 013537 |
| HIST1H1D  | 6p22. 2                | 0. 210576256  | 0. 004664 | 0. 013541 |
| LINGO2    | 9p21. 2-p <sub>2</sub> | -0. 210568684 | 0. 004665 | 0. 013544 |
| SDAD1     | 4q21. 1                | -0. 210560124 | 0. 004667 | 0. 013547 |
| SSPO      | 7q36. 1                | -0. 210553957 | 0. 004668 | 0. 013548 |
| RNFT1     | 17q23. 1               | -0. 210541293 | 0. 004671 | 0. 013554 |
| BTBD6     | 14q32. 33              | -0. 210518277 | 0. 004676 | 0. 013565 |
| GOLGA3    | 12q24. 33              | -0. 210505723 | 0. 004678 | 0. 01357  |
| PPP1R3B   | 8p23. 1                | 0. 210470153  | 0. 004685 | 0. 013587 |
| C9ORF152  | 9q31. 3                | 0. 210470153  | 0. 004685 | 0. 013587 |
| GAK       | 4p16. 3                | 0. 210419936  | 0. 004695 | 0. 013615 |
| TTN       | 2q31. 2                | -0. 210413659 | 0. 004697 | 0. 013616 |
| ADGRG4    | Xq26. 3                | -0. 210410214 | 0. 004697 | 0. 013616 |
| CRYZ      | 1p31. 1                | 0. 210405289  | 0. 004698 | 0. 013617 |
| SERPINA4  | 14q32. 13              | 0. 210388991  | 0. 004702 | 0. 013624 |
| CRYAB     | 11q23. 1               | -0. 210386458 | 0. 004702 | 0. 013624 |
| ATXN7L3   | 17q21. 31              | 0. 210365535  | 0. 004706 | 0. 013634 |
| DUS2      | 16q22. 1               | 0. 210350888  | 0. 004709 | 0. 01364  |
| CDNF      | 10p13                  | -0. 210348796 | 0. 00471  | 0. 01364  |
| VMA21     | Xq28                   | -0. 210313226 | 0. 004717 | 0. 013659 |
| SCFD2     | 4q12                   | -0. 210304856 | 0. 004719 | 0. 013662 |
| ARL16     | 17q25. 3               | 0. 210296487  | 0. 00472  | 0. 013665 |
| NEURL1B   | 5q35. 1                | -0. 210292302 | 0. 004721 | 0. 013665 |
| NOMO2     | 16p12. 3               | -0. 210279748 | 0. 004724 | 0. 013671 |
| SPDYC     | 11q13. 1               | 0. 210259338  | 0. 004728 | 0. 013681 |
| DCP1A     | 3p21. 1                | -0. 210204423 | 0. 004739 | 0. 013711 |
| AHCYL1    | 1p13. 3                | -0. 2101835   | 0. 004743 | 0. 013721 |
| SLCO2A1   | 3q22. 1-q <sub>2</sub> | -0. 210181407 | 0. 004744 | 0. 013721 |



|           |            |               |           |           |
|-----------|------------|---------------|-----------|-----------|
| PRKDC     | 8q11. 21   | -0. 210154207 | 0. 004749 | 0. 013735 |
| ASB4      | 7q21. 3    | -0. 210116916 | 0. 004757 | 0. 013755 |
| GPR18     | 13q32. 3   | -0. 210102008 | 0. 00476  | 0. 013761 |
| PRF1      | 10q22. 1   | -0. 210097713 | 0. 004761 | 0. 013761 |
| TACC3     | 4p16. 3    | 0. 210095621  | 0. 004761 | 0. 013761 |
| KDM1B     | 6p22. 3    | -0. 210091436 | 0. 004762 | 0. 013762 |
| CMTM6     | 3p22. 3    | 0. 21003285   | 0. 004774 | 0. 013794 |
| MRPL48    | 11q13. 4   | 0. 210028665  | 0. 004775 | 0. 013794 |
| MMS22L    | 6q16. 1    | -0. 210026573 | 0. 004775 | 0. 013794 |
| CFAP69    | 7q21. 13   | -0. 210009834 | 0. 004779 | 0. 013802 |
| EEF1A1P9  | 4q24       | -0. 210005649 | 0. 004779 | 0. 013802 |
| RPLP1     | 15q23      | 0. 209991003  | 0. 004782 | 0. 013808 |
| YY1AP1    | 1q22       | 0. 209988911  | 0. 004783 | 0. 013808 |
| ARPC5L    | 9q33. 3    | 0. 209936602  | 0. 004794 | 0. 013837 |
| PROC      | 2q14. 3    | 0. 209913586  | 0. 004798 | 0. 013849 |
| ZDHC21    | 9p22. 3    | -0. 209888477 | 0. 004804 | 0. 013862 |
| LINC00589 | 8p12       | 0. 20985814   | 0. 00481  | 0. 013878 |
| LRRC49    | 15q23      | -0. 209850815 | 0. 004811 | 0. 013879 |
| GABRG2    | 5q34       | -0. 209849909 | 0. 004811 | 0. 013879 |
| ANGPTL3   | 1p31. 3    | -0. 209844167 | 0. 004813 | 0. 01388  |
| TRAK2     | 2q33. 1    | -0. 209834076 | 0. 004815 | 0. 013883 |
| FEZF2     | 3p14. 2    | -0. 2098329   | 0. 004815 | 0. 013883 |
| PDZD4     | Xq28       | -0. 209829891 | 0. 004816 | 0. 013883 |
| HLA-B     | 6p21. 33   | 0. 209817337  | 0. 004818 | 0. 013888 |
| CENPQ     | 6p12. 3    | -0. 209785952 | 0. 004825 | 0. 013905 |
| RRP8      | 11p15. 4   | 0. 209777582  | 0. 004826 | 0. 013908 |
| PCDHGA9   | 5q31. 3    | -0. 209773398 | 0. 004827 | 0. 013908 |
| RAB23     | 6p12. 1-p1 | -0. 209723181 | 0. 004838 | 0. 013936 |
| LDLRAD3   | 11p13      | -0. 209708535 | 0. 004841 | 0. 013943 |
| KCTD19    | 16q22. 1   | -0. 209694962 | 0. 004843 | 0. 013949 |
| NOL4      | 18q12. 1   | -0. 209676011 | 0. 004847 | 0. 013958 |
| KLK2      | 19q13. 33  | 0. 209659777  | 0. 004851 | 0. 013966 |
| HES2      | 1p36. 31   | 0. 209640643  | 0. 004855 | 0. 013975 |
| PCDH12    | 5q31. 3    | -0. 209629025 | 0. 004857 | 0. 01398  |
| GASK1B    | 4q32. 1    | -0. 209606009 | 0. 004862 | 0. 013992 |
| HTR4      | 5q32       | -0. 209597807 | 0. 004864 | 0. 013995 |
| IRF2BPL   | 14q24. 3   | -0. 209591363 | 0. 004865 | 0. 013995 |
| MOV10     | 1p13. 2    | 0. 209591363  | 0. 004865 | 0. 013995 |
| VWA3B     | 2q11. 2    | 0. 209580901  | 0. 004867 | 0. 013999 |
| CCDC13    | 3p22. 1    | -0. 209564162 | 0. 004871 | 0. 014007 |
| TARS2     | 1q21. 2    | 0. 209549516  | 0. 004874 | 0. 014014 |
| MADD      | 11p11. 2   | -0. 209545331 | 0. 004875 | 0. 014014 |
| SDHAP1    | 3q29       | 0. 209488837  | 0. 004886 | 0. 014046 |
| NDN       | 15q11. 2   | -0. 209440713 | 0. 004896 | 0. 014073 |
| DPP6      | 7q36. 2    | -0. 209430251 | 0. 004899 | 0. 014077 |
| TCEAL6    | Xq22. 1    | -0. 209421882 | 0. 0049   | 0. 01408  |
| HNRNPH3   | 10q21. 3   | -0. 209373758 | 0. 00491  | 0. 014107 |
| SP110     | 2q37. 1    | 0. 209369573  | 0. 004911 | 0. 014108 |
| STUM      | 1q42. 12   | -0. 209328881 | 0. 00492  | 0. 01413  |
| TGFB1     | 19q13. 2   | 0. 20926914   | 0. 004932 | 0. 014164 |
| PAPPA2    | 1q25. 2    | -0. 209219725 | 0. 004943 | 0. 014192 |
| NCK1      | 3q22. 3    | 0. 209198     | 0. 004947 | 0. 014203 |
| IPO5      | 13q32. 2   | -0. 209193815 | 0. 004948 | 0. 014204 |
| CASKIN1   | 16p13. 3   | -0. 209162526 | 0. 004955 | 0. 014221 |

|           |           |              |          |          |
|-----------|-----------|--------------|----------|----------|
| MUTYH     | 1p34.1    | 0.209158245  | 0.004956 | 0.014221 |
| SCG3      | 15q21.2   | -0.209106045 | 0.004967 | 0.01425  |
| HOXC8     | 12q13.13  | 0.209103953  | 0.004967 | 0.01425  |
| CH25H     | 10q23.31  | -0.209043165 | 0.00498  | 0.014285 |
| ARHGAP20  | 11q22.3-c | -0.208995041 | 0.00499  | 0.014313 |
| CCDC28A   | 6q24.1    | -0.208972025 | 0.004995 | 0.014325 |
| C16ORF89  | 16p13.3   | -0.20896784  | 0.004996 | 0.014325 |
| PCGF6     | 10q24.33  | -0.208957379 | 0.004999 | 0.014329 |
| AADAT     | 4q33      | -0.208953194 | 0.004999 | 0.01433  |
| ZNF148    | 3q21.2    | -0.20894064  | 0.005002 | 0.014336 |
| CEP63     | 3q22.2    | -0.208930178 | 0.005004 | 0.01434  |
| KRT5      | 12q13.13  | 0.20891144   | 0.005008 | 0.014349 |
| NGFR      | 17q21.33  | -0.2088967   | 0.005011 | 0.014356 |
| SP2       | 17q21.32  | -0.208890423 | 0.005013 | 0.014356 |
| RUNX1-IT1 | 21q22.12  | 0.208890016  | 0.005013 | 0.014356 |
| SIRT4     | 12q24.23- | -0.208882054 | 0.005015 | 0.014359 |
| CCDC77    | 12p13.33  | -0.208865315 | 0.005018 | 0.014367 |
| ZNF134    | 19q13.43  | -0.208838114 | 0.005024 | 0.014382 |
| CCBE1     | 18q21.32  | -0.208832993 | 0.005025 | 0.014383 |
| CARD6     | 5p13.1    | 0.208792083  | 0.005034 | 0.014405 |
| FAM47E    | 4q21.1    | -0.20878999  | 0.005034 | 0.014405 |
| INOSOC    | 18q12.2   | 0.208783713  | 0.005036 | 0.014407 |
| LPA       | 6q25.3-q2 | -0.208754223 | 0.005042 | 0.014423 |
| RPL8      | 8q24.3    | 0.208720942  | 0.005049 | 0.014442 |
| TMEM59L   | 19p13.11  | -0.208697926 | 0.005054 | 0.014454 |
| LAMA5     | 20q13.33  | 0.208645618  | 0.005065 | 0.014484 |
| PRKD3     | 2p22.2    | -0.208591216 | 0.005077 | 0.014515 |
| SLIT1     | 10q24.1   | -0.208578662 | 0.00508  | 0.014521 |
| LOC644669 | 18p11.21  | -0.208517579 | 0.005093 | 0.014557 |
| IL21      | 4q27      | -0.2085054   | 0.005096 | 0.014562 |
| LILRB1    | 19q13.42  | -0.208501245 | 0.005097 | 0.014563 |
| AKIRIN2   | 6q15      | -0.208482414 | 0.005101 | 0.014572 |
| TMUB1     | 7q36.1    | 0.208471952  | 0.005103 | 0.014577 |
| MB21D2    | 3q29      | -0.208457305 | 0.005106 | 0.014584 |
| SEC22C    | 3p22.1    | -0.208407089 | 0.005117 | 0.014613 |
| PTHLH     | 12p11.22  | 0.208388258  | 0.005121 | 0.014622 |
| NDRG3     | 20q11.23  | -0.208381981 | 0.005123 | 0.014624 |
| SNORD115- | 15q11.2   | -0.208335594 | 0.005133 | 0.014651 |
| CIPC      | 14q24.3   | -0.208331764 | 0.005133 | 0.014651 |
| PADI4     | 1p36.13   | -0.20832746  | 0.005134 | 0.014652 |
| KIF23     | 15q23     | 0.208321302  | 0.005136 | 0.014654 |
| SLC22A17  | 14q11.2   | -0.208254347 | 0.00515  | 0.014693 |
| KLRF1     | 12p13.31  | -0.208242948 | 0.005153 | 0.014698 |
| CDK11B    | 1p36.33   | 0.208229239  | 0.005156 | 0.014705 |
| GABRE     | Xq28      | 0.208220869  | 0.005158 | 0.014708 |
| TEF       | 22q13.2   | -0.20820413  | 0.005161 | 0.014716 |
| ZNF575    | 19q13.31  | 0.208199946  | 0.005162 | 0.014717 |
| H1FNT     | 12q13.11  | -0.208184037 | 0.005166 | 0.014725 |
| SHISA7    | 19q13.42  | -0.208176162 | 0.005168 | 0.014728 |
| RFTN2     | 2q33.1    | -0.208172745 | 0.005168 | 0.014728 |
| CIB4      | 2p23.3    | -0.208140877 | 0.005175 | 0.014744 |
| ZNF804A   | 2q32.1    | -0.208139703 | 0.005176 | 0.014744 |
| EXOSC1    | 10q24.1   | 0.208118344  | 0.00518  | 0.014755 |
| TAP1      | 6p21.32   | 0.208074404  | 0.00519  | 0.01478  |

|           |           |              |          |          |
|-----------|-----------|--------------|----------|----------|
| AFM       | 4q13.3    | -0.208072339 | 0.00519  | 0.01478  |
| MED28     | 4p15.32   | -0.208066035 | 0.005192 | 0.014782 |
| CCDC130   | 19p13.13  | 0.208055573  | 0.005194 | 0.014786 |
| SCGN      | 6p22.2    | -0.208044107 | 0.005197 | 0.014791 |
| C7ORF31   | 7p15.3    | -0.208032557 | 0.005199 | 0.014796 |
| SHISA3    | 4p13      | -0.208029527 | 0.0052   | 0.014796 |
| SBSN      | 19q13.12  | 0.208024962  | 0.005201 | 0.014797 |
| FGFBP3    | 10q23.32  | -0.208007449 | 0.005205 | 0.014806 |
| CHST4     | 16q22.2   | 0.207974055  | 0.005212 | 0.014825 |
| SLC35E2A  | 1p36.33   | -0.207944678 | 0.005219 | 0.014841 |
| VPS4A     | 16q22.1   | 0.207936309  | 0.00522  | 0.014844 |
| LRRIQ4    | 3q26.2    | 0.207886235  | 0.005232 | 0.014872 |
| IGIP      | 5q31.3    | -0.207886092 | 0.005232 | 0.014872 |
| DCPS      | 11q24.2   | 0.207871446  | 0.005235 | 0.014879 |
| SEMA3D    | 7q21.11   | -0.207865169 | 0.005236 | 0.014881 |
| ZNF225    | 19q13.31  | -0.207858891 | 0.005238 | 0.014881 |
| SERPIN1   | 18q21.33  | 0.207858697  | 0.005238 | 0.014881 |
| KIF4A     | Xq13.1    | 0.207846446  | 0.00524  | 0.014886 |
| ANKRD30B  | 18p11.21  | -0.20783805  | 0.005242 | 0.014889 |
| NUDT10    | Xp11.22   | -0.207835876 | 0.005243 | 0.014889 |
| MRPL49    | 11q13.1   | 0.207827506  | 0.005245 | 0.014892 |
| RIPPLY2   | 6q14.2    | -0.207786856 | 0.005254 | 0.014916 |
| NOL10     | 2p25.1    | 0.20776892   | 0.005258 | 0.014924 |
| TSHB      | 1p13.2    | -0.2077667   | 0.005258 | 0.014924 |
| PEX6      | 6p21.1    | -0.207672672 | 0.005279 | 0.014982 |
| DNAJB2    | 2q35      | 0.207666395  | 0.005281 | 0.014984 |
| STON2     | 14q31.1   | 0.207639194  | 0.005287 | 0.014999 |
| DGKQ      | 4p16.3    | 0.207628732  | 0.005289 | 0.015003 |
| SALL3     | 18q23     | -0.207599297 | 0.005296 | 0.01502  |
| KLF10     | 8q22.3    | -0.207559684 | 0.005305 | 0.015042 |
| DCTN1-AS1 | 12p13.1   | 0.207557461  | 0.005305 | 0.015042 |
| SH3GL2    | 9p22.2    | -0.207526286 | 0.005312 | 0.01506  |
| ARPP21    | 3p22.3    | -0.207509744 | 0.005316 | 0.015068 |
| ZDHHC16   | 10q24.1   | 0.207505283  | 0.005317 | 0.015069 |
| CASP14    | 19p13.12  | 0.207402377  | 0.00534  | 0.015133 |
| OS9       | 12q13.3-c | -0.207371372 | 0.005347 | 0.015151 |
| RAD51C    | 17q22     | -0.207358818 | 0.00535  | 0.015156 |
| TMED6     | 16q22.1   | -0.207354634 | 0.005351 | 0.015157 |
| RCC2      | 1p36.13   | 0.207339987  | 0.005354 | 0.015161 |
| TMEM138   | 11q12.2   | 0.207339987  | 0.005354 | 0.015161 |
| KRAS      | 12p12.1   | 0.207337895  | 0.005355 | 0.015161 |
| FTH1      | 11q12.3   | 0.207275124  | 0.005369 | 0.015199 |
| SAMD4A    | 14q22.2   | -0.207241646 | 0.005377 | 0.015219 |
| GMFB      | 14q22.2   | -0.207235369 | 0.005378 | 0.015221 |
| ZNF439    | 19p13.2   | -0.207212353 | 0.005383 | 0.015233 |
| GBP6      | 1p22.2    | 0.207202546  | 0.005385 | 0.015238 |
| NME1      | 17q21.33  | 0.207180968  | 0.00539  | 0.015249 |
| PEX16     | 11p11.2   | 0.207164229  | 0.005394 | 0.015258 |
| CDH23     | 10q22.1   | -0.207143306 | 0.005399 | 0.015269 |
| CELF5     | 19p13.3   | -0.207116105 | 0.005405 | 0.015285 |
| OTUD3     | 1p36.13   | -0.207080535 | 0.005413 | 0.015306 |
| SETD7     | 4q31.1    | -0.207021949 | 0.005427 | 0.015341 |
| CGRRF1    | 14q22.2   | -0.207015672 | 0.005428 | 0.015343 |
| RHOT2     | 16p13.3   | 0.207011487  | 0.005429 | 0.015344 |

|          |           |              |          |          |
|----------|-----------|--------------|----------|----------|
| ZNF75A   | 16p13.3   | -0.206996841 | 0.005432 | 0.015351 |
| NIBAN1   | 1q25.3    | -0.206990563 | 0.005434 | 0.015353 |
| MPV17    | 2p23.3    | 0.206946624  | 0.005444 | 0.015378 |
| SLC22A8  | 11q12.3   | -0.206946125 | 0.005444 | 0.015378 |
| SLC34A1  | 5q35.3    | 0.206925244  | 0.005449 | 0.015389 |
| COA7     | 1p32.3    | -0.206900592 | 0.005455 | 0.015403 |
| MMP23B   | 1p36.33   | 0.206871299  | 0.005461 | 0.01542  |
| FCGR3B   | 1q23.3    | -0.206804344 | 0.005477 | 0.015461 |
| SS18     | 18q11.2   | -0.206779235 | 0.005483 | 0.015476 |
| TBX21    | 17q21.32  | -0.206765743 | 0.005486 | 0.015482 |
| CSPP1    | 8q13.1-q1 | -0.206741573 | 0.005491 | 0.015495 |
| MRPL55   | 1q42.13   | 0.206739481  | 0.005492 | 0.015495 |
| ALG9     | 11q23.1   | -0.206722742 | 0.005496 | 0.015504 |
| ETV6     | 12p13.2   | 0.206716465  | 0.005497 | 0.015505 |
| OR13C2   | 9q31.1    | -0.206714897 | 0.005498 | 0.015505 |
| EMC4     | 15q14     | 0.206680895  | 0.005505 | 0.015524 |
| TRIM26   | 6p22.1    | 0.206678802  | 0.005506 | 0.015524 |
| SLC45A1  | 1p36.23   | -0.206628694 | 0.005518 | 0.015554 |
| HIVEP3   | 1p34.2    | -0.206623463 | 0.005519 | 0.015556 |
| RPL13    | 16q24.3 1 | 0.206593016  | 0.005526 | 0.015573 |
| TXNRD1   | 12q23.3   | -0.206576277 | 0.00553  | 0.015582 |
| ADCYAP1  | 18p11.32  | -0.206544892 | 0.005537 | 0.015601 |
| ANO2     | 12p13.31  | -0.206484213 | 0.005551 | 0.015639 |
| NCOA7    | 6q22.31-c | -0.206438181 | 0.005562 | 0.015666 |
| IQCF1    | 3p21.2    | 0.206436323  | 0.005563 | 0.015666 |
| REPIN1   | 7q36.1    | -0.206421442 | 0.005566 | 0.015673 |
| CDH19    | 18q22.1   | -0.206415199 | 0.005568 | 0.015675 |
| SYTL4    | Xq22.1    | 0.206394242  | 0.005572 | 0.015687 |
| VTI1B    | 14q24.1   | 0.206358672  | 0.005581 | 0.015708 |
| TUFM     | 16p11.2   | 0.206350302  | 0.005583 | 0.015712 |
| DYRK1A   | 21q22.13  | -0.206291716 | 0.005597 | 0.015748 |
| IGSF22   | 11p15.1   | 0.206251962  | 0.005606 | 0.015772 |
| CDK2     | 12q13.2   | 0.206237315  | 0.005609 | 0.015778 |
| HSD3B7   | 16p11.2   | 0.206237315  | 0.005609 | 0.015778 |
| ZNF765   | 19q13.42  | -0.206220576 | 0.005613 | 0.015787 |
| SF3A3    | 1p34.3    | -0.206214299 | 0.005615 | 0.015787 |
| POU4F3   | 5q32      | -0.206213699 | 0.005615 | 0.015787 |
| FBXW12   | 3p21.31   | -0.206208966 | 0.005616 | 0.015788 |
| TOR1A    | 9q34.11   | -0.206199653 | 0.005618 | 0.015792 |
| CSNK2B   | 6p21.33   | 0.206193376  | 0.00562  | 0.015794 |
| ERVFRD-1 | 6p24.2    | -0.206181738 | 0.005623 | 0.015799 |
| NKX2-8   | 14q13.3   | 0.206177365  | 0.005624 | 0.0158   |
| GDF6     | 8q22.1    | -0.206172452 | 0.005625 | 0.015801 |
| ZNF703   | 8p11.23   | 0.20612642   | 0.005636 | 0.015829 |
| TMEM37   | 2q14.2    | 0.206122235  | 0.005637 | 0.01583  |
| TRIM59   | 3q25.33   | 0.206118051  | 0.005638 | 0.01583  |
| LOXL2    | 8p21.3    | 0.206072019  | 0.005649 | 0.015859 |
| RPP21    | 6p22.1    | 0.206057372  | 0.005652 | 0.015867 |
| TOMM40   | 19q13.32  | 0.206036449  | 0.005657 | 0.015878 |
| GEMIN7   | 19q13.32  | 0.206011341  | 0.005663 | 0.015891 |
| SPAG16   | 2q34      | 0.206011341  | 0.005663 | 0.015891 |
| TNFSF8   | 9q32-q33. | -0.205982048 | 0.00567  | 0.015908 |
| MSRA     | 8p23.1    | 0.205938108  | 0.005681 | 0.015935 |
| MUC12    | 7q22.1    | 0.205923462  | 0.005684 | 0.015943 |

|           |            |               |           |           |
|-----------|------------|---------------|-----------|-----------|
| FARSA     | 19p13. 13  | 0. 205910907  | 0. 005687 | 0. 015949 |
| DCTD      | 4q35. 1    | 0. 205848137  | 0. 005702 | 0. 015989 |
| MT3       | 16q13      | -0. 205838719 | 0. 005704 | 0. 015993 |
| ATP6AP1   | Xq28       | -0. 205783274 | 0. 005718 | 0. 016028 |
| HIST1H2AI | 6p22. 1    | 0. 205753295  | 0. 005725 | 0. 016046 |
| OSER1     | 20q13. 12  | 0. 205714226  | 0. 005734 | 0. 01607  |
| DCAF12    | 9p13. 3    | -0. 205697487 | 0. 005738 | 0. 016079 |
| VAC14     | 16q22. 1-c | 0. 205682841  | 0. 005742 | 0. 016087 |
| EPPK1     | 8q24. 3    | 0. 205659825  | 0. 005747 | 0. 0161   |
| CHRNA2    | 2q37. 1    | 0. 205649032  | 0. 00575  | 0. 016105 |
| ATF2      | 2q31. 1    | -0. 205638901 | 0. 005753 | 0. 01611  |
| STAT3     | 17q21. 2   | -0. 205624255 | 0. 005756 | 0. 016117 |
| SNX10     | 7p15. 2    | -0. 205609608 | 0. 00576  | 0. 016125 |
| ADCY8     | 8q24. 22   | -0. 205603904 | 0. 005761 | 0. 016125 |
| KIF7      | 15q26. 1   | 0. 205603331  | 0. 005761 | 0. 016125 |
| CLK4      | 5q35. 3    | -0. 205563576 | 0. 005771 | 0. 01615  |
| NDUFAF3   | 3p21. 31   | 0. 205551022  | 0. 005774 | 0. 016154 |
| TAF4B     | 18q11. 2   | -0. 205551022 | 0. 005774 | 0. 016154 |
| TRPM3     | 9q21. 12-c | -0. 205533126 | 0. 005778 | 0. 016163 |
| DKFZP434F | 16q13      | -0. 205506492 | 0. 005785 | 0. 016179 |
| ZC3H12A   | 1p34. 3    | 0. 205465235  | 0. 005795 | 0. 016205 |
| MARVELD3  | 16q22. 2   | 0. 205458958  | 0. 005796 | 0. 016207 |
| GABRA1    | 5q34       | -0. 205443489 | 0. 0058   | 0. 016215 |
| ALDH1L1   | 3q21. 3    | 0. 205424542  | 0. 005805 | 0. 016226 |
| POMT2     | 14q24. 3   | -0. 20539828  | 0. 005811 | 0. 016242 |
| PLEKHG6   | 12p13. 31  | 0. 205394095  | 0. 005812 | 0. 016242 |
| SCARF1    | 17p13. 3   | -0. 205360618 | 0. 00582  | 0. 016263 |
| KCNK2     | 1q41       | -0. 205341786 | 0. 005825 | 0. 016273 |
| TMEM245   | 9q31. 3    | -0. 205331325 | 0. 005827 | 0. 016278 |
| SOD2      | 6q25. 3    | -0. 205316678 | 0. 005831 | 0. 016284 |
| ADIPOQ    | 3q27. 3    | -0. 205316345 | 0. 005831 | 0. 016284 |
| CYP2R1    | 11p15. 2   | 0. 205308309  | 0. 005833 | 0. 016287 |
| ISL2      | 15q24. 3   | 0. 205253183  | 0. 005846 | 0. 016323 |
| OXCT1     | 5p13. 1    | -0. 205138828 | 0. 005875 | 0. 016399 |
| PACSIN3   | 11p11. 2   | 0. 205109535  | 0. 005882 | 0. 016417 |
| BIRC3     | 11q22. 2   | 0. 205086519  | 0. 005887 | 0. 01643  |
| PTPRN     | 2q35       | -0. 205048857 | 0. 005897 | 0. 016454 |
| 6-Mar     | 5p15. 2    | -0. 205019564 | 0. 005904 | 0. 016472 |
| SH3BGRL   | Xq21. 1    | -0. 205013286 | 0. 005906 | 0. 016474 |
| HEATR5B   | 2p22. 2    | -0. 204992363 | 0. 005911 | 0. 016484 |
| HERC6     | 4q22. 1    | 0. 204992363  | 0. 005911 | 0. 016484 |
| SIGLEC6   | 19q13. 41  | -0. 204988861 | 0. 005912 | 0. 016484 |
| LINC00205 | 21q22. 3   | -0. 20496307  | 0. 005918 | 0. 016499 |
| POMT1     | 9q34. 13   | -0. 204952608 | 0. 005921 | 0. 016504 |
| MSL1      | 17q21. 1   | 0. 204925407  | 0. 005927 | 0. 016521 |
| SLC7A6OS  | 16q22. 1   | 0. 204902392  | 0. 005933 | 0. 016534 |
| SMPDL3A   | 6q22. 31   | -0. 204885653 | 0. 005937 | 0. 016544 |
| PABPC4L   | 4q28. 3    | -0. 204875191 | 0. 00594  | 0. 016549 |
| KLF3      | 4p14       | 0. 20485636   | 0. 005945 | 0. 016558 |
| KLHL29    | 2p24. 1    | -0. 204854267 | 0. 005945 | 0. 016558 |
| CCRL2     | 3p21. 31   | 0. 204850083  | 0. 005946 | 0. 016559 |
| YWHAEP7   | 17q12      | 0. 204823534  | 0. 005953 | 0. 016575 |
| SNX19     | 11q24. 3-c | -0. 204753834 | 0. 00597  | 0. 016621 |
| UBL5      | 19p13. 2   | 0. 204737095  | 0. 005974 | 0. 01663  |

|           |            |               |           |           |
|-----------|------------|---------------|-----------|-----------|
| MAATS1    | 3q13. 33   | -0. 204735003 | 0. 005975 | 0. 01663  |
| SFT2D1    | 6q27       | 0. 204678509  | 0. 005989 | 0. 016667 |
| TNFRSF25  | 1p36. 31   | 0. 204672232  | 0. 005991 | 0. 016669 |
| AHR       | 7p21. 1    | 0. 204661771  | 0. 005993 | 0. 016674 |
| TBC1D22A  | 22q13. 31  | 0. 204653401  | 0. 005995 | 0. 016677 |
| CLCN6     | 1p36. 22   | -0. 204649216 | 0. 005996 | 0. 016678 |
| GNG11     | 7q21. 3    | -0. 204584353 | 0. 006013 | 0. 016721 |
| INSYN2A   | 10q26. 2   | -0. 204525767 | 0. 006027 | 0. 01676  |
| LOC38895E | 2p15       | 0. 204521583  | 0. 006028 | 0. 01676  |
| GPSM2     | 1p13. 3    | 0. 204502751  | 0. 006033 | 0. 016771 |
| MUSK      | 9q31. 3    | -0. 204466463 | 0. 006042 | 0. 016794 |
| TMEM39B   | 1p35. 2    | -0. 204460904 | 0. 006044 | 0. 016796 |
| AR        | Xq12       | -0. 204435903 | 0. 00605  | 0. 016811 |
| SCARNA11  | 12p13. 31  | -0. 204397241 | 0. 00606  | 0. 016836 |
| DIRAS3    | 1p31. 3    | -0. 204379302 | 0. 006064 | 0. 016844 |
| RSRP1     | 1p36. 11   | 0. 20437721   | 0. 006065 | 0. 016844 |
| BUB1      | 2q13       | 0. 204375118  | 0. 006065 | 0. 016844 |
| ZNF620    | 3p22. 1    | -0. 204373025 | 0. 006066 | 0. 016844 |
| SETMAR    | 3p26. 1    | -0. 204358379 | 0. 00607  | 0. 016852 |
| NONO      | Xq13. 1    | -0. 204345825 | 0. 006073 | 0. 016858 |
| RAB21     | 12q21. 1   | -0. 204314439 | 0. 006081 | 0. 016878 |
| GJB1      | Xq13. 1    | 0. 204289331  | 0. 006087 | 0. 016893 |
| PYHIN1    | 1q23. 1    | -0. 204276777 | 0. 00609  | 0. 0169   |
| KCNE4     | 2q36. 1    | -0. 204243299 | 0. 006099 | 0. 016921 |
| NKRF      | Xq24       | -0. 204237022 | 0. 006101 | 0. 016923 |
| BHMT2     | 5q14. 1    | -0. 204224468 | 0. 006104 | 0. 01693  |
| MFSD4B    | 6q21       | -0. 204205637 | 0. 006109 | 0. 016941 |
| ZFAND2A   | 7p22. 3    | 0. 20419936   | 0. 00611  | 0. 016943 |
| FLT4      | 5q35. 3    | -0. 204176344 | 0. 006116 | 0. 016957 |
| KCNG3     | 2p21       | -0. 204128241 | 0. 006128 | 0. 016988 |
| DNAJC21   | 5p13. 2    | -0. 204111481 | 0. 006133 | 0. 016998 |
| RBCK1     | 20p13      | 0. 204059172  | 0. 006146 | 0. 017033 |
| UBR5      | 8q22. 3    | -0. 204044525 | 0. 00615  | 0. 017041 |
| POU6F1    | 12q13. 13  | -0. 204038248 | 0. 006151 | 0. 017042 |
| ZNF579    | 19q13. 42  | 0. 204036156  | 0. 006152 | 0. 017042 |
| CEP164    | 11q23. 3   | -0. 204002678 | 0. 00616  | 0. 017063 |
| IL31RA    | 5q11. 2    | 0. 203998883  | 0. 006161 | 0. 017064 |
| MAP3K7CL  | 21q21. 3   | -0. 203988032 | 0. 006164 | 0. 017069 |
| METTL3    | 14q11. 2   | -0. 203981755 | 0. 006166 | 0. 017071 |
| NXPH4     | 12q13. 3   | -0. 203942    | 0. 006176 | 0. 017097 |
| CCDC166   | 8q24. 3    | 0. 203928144  | 0. 00618  | 0. 017099 |
| TMEM42    | 3p21. 31   | 0. 20392746   | 0. 00618  | 0. 017099 |
| CLDN3     | 7q11. 23   | -0. 203925261 | 0. 00618  | 0. 017099 |
| FAH       | 15q25. 1   | 0. 203923169  | 0. 006181 | 0. 017099 |
| MORN4     | 10q24. 2   | -0. 203923169 | 0. 006181 | 0. 017099 |
| PABPC1L2A | Xq13. 2    | -0. 203907229 | 0. 006185 | 0. 017108 |
| SLC04A1-A | 20q13. 33  | 0. 203897121  | 0. 006188 | 0. 017113 |
| PIBF1     | 13q21. 33- | 0. 203829013  | 0. 006205 | 0. 017159 |
| HS2ST1    | 1p22. 3    | -0. 203810181 | 0. 00621  | 0. 01717  |
| CDH24     | 14q11. 2   | 0. 203797627  | 0. 006213 | 0. 017177 |
| C8ORF34   | 8q13. 2    | -0. 203784134 | 0. 006217 | 0. 017184 |
| EEF1A1    | 6q13       | -0. 203776704 | 0. 006219 | 0. 017186 |
| CACNG6    | 19q13. 42  | 0. 203772968  | 0. 00622  | 0. 017186 |
| MC3R      | 20q13. 2   | -0. 203770887 | 0. 00622  | 0. 017186 |

|           |           |              |          |          |
|-----------|-----------|--------------|----------|----------|
| SSTR1     | 14q21.1   | -0.203749503 | 0.006226 | 0.017199 |
| NUP160    | 11p11.2   | -0.203730672 | 0.006231 | 0.01721  |
| CSF2RB    | 22q12.3   | -0.203709748 | 0.006236 | 0.017223 |
| PCMTD1    | 8q11.23   | -0.203686732 | 0.006242 | 0.017237 |
| SOD1      | 21q22.11  | 0.203659532  | 0.006249 | 0.017253 |
| MRPL37    | 1p32.3    | 0.203657439  | 0.00625  | 0.017253 |
| ATAD3A    | 1p36.33   | 0.203655347  | 0.00625  | 0.017253 |
| LINC01634 | 22q11.21  | -0.203644699 | 0.006253 | 0.017258 |
| TRPC2     | 11p15.4   | 0.20361706   | 0.00626  | 0.017275 |
| PPIH      | 1p34.2    | 0.203592576  | 0.006267 | 0.017291 |
| ARNTL2    | 12p11.23  | 0.203582115  | 0.006269 | 0.017291 |
| GTSE1-DT  | 22q13.31  | -0.203582115 | 0.006269 | 0.017291 |
| SUB1      | 5p13.3    | -0.203582115 | 0.006269 | 0.017291 |
| PTPN23    | 3p21.31   | 0.203575837  | 0.006271 | 0.017291 |
| TYW1B     | 7q11.22-c | -0.203575837 | 0.006271 | 0.017291 |
| ADAMTS2   | 5q35.3    | -0.203540267 | 0.00628  | 0.017312 |
| ARL5C     | 17q12     | -0.203539001 | 0.006281 | 0.017312 |
| MYO1D     | 17q11.2   | 0.203529806  | 0.006283 | 0.017317 |
| KDM5A     | 12p13.33  | -0.20350679  | 0.006289 | 0.017331 |
| SREK1     | 5q12.3    | -0.203500513 | 0.006291 | 0.017333 |
| SRSF4     | 1p35.3    | 0.203437742  | 0.006307 | 0.017376 |
| CPA5      | 7q32.2    | -0.203428407 | 0.00631  | 0.01738  |
| PPP1R1A   | 12q13.2   | -0.203398094 | 0.006318 | 0.0174   |
| IL3RA     | Xp22.33 ε | -0.203381248 | 0.006322 | 0.01741  |
| DLX5      | 7q21.3    | 0.203368694  | 0.006325 | 0.017415 |
| CD2AP     | 6p12.3    | 0.203366602  | 0.006326 | 0.017415 |
| YIPF2     | 19p13.2   | 0.203347771  | 0.006331 | 0.017427 |
| SLC25A34  | 1p36.21   | -0.203339401 | 0.006333 | 0.01743  |
| ZFPM1     | 16q24.2   | 0.203331032  | 0.006335 | 0.017434 |
| SCG5      | 15q13.3   | -0.203310108 | 0.006341 | 0.017447 |
| DDR2      | 1q23.3    | -0.203278723 | 0.006349 | 0.017467 |
| C11ORF53  | 11q23.1   | 0.203254678  | 0.006355 | 0.017482 |
| HCAR1     | 12q24.31  | 0.203234783  | 0.006361 | 0.017494 |
| CMKLR1    | 12q23.3   | -0.20320549  | 0.006368 | 0.017513 |
| ADGRG5    | 16q21     | -0.203153181 | 0.006382 | 0.017549 |
| RFK       | 9q21.13   | -0.203115519 | 0.006392 | 0.017574 |
| RPL14     | 3p22.1    | 0.20309878   | 0.006397 | 0.017584 |
| TMEM241   | 18q11.2   | 0.203088318  | 0.0064   | 0.017589 |
| SOX12     | 20p13     | -0.20307158  | 0.006404 | 0.017599 |
| RARS      | 5q34      | 0.203061118  | 0.006407 | 0.017604 |
| LMO2      | 11p13     | -0.203025548 | 0.006416 | 0.017628 |
| FRRS1     | 1p21.2    | 0.203019271  | 0.006418 | 0.01763  |
| PKNOX2    | 11q24.2   | -0.202925115 | 0.006443 | 0.017697 |
| CLEC10A   | 17p13.1   | -0.202886512 | 0.006453 | 0.017723 |
| NME1-NME2 | 17q21.33  | 0.202879083  | 0.006455 | 0.017726 |
| PWWP2B    | 10q26.3   | 0.202826774  | 0.006469 | 0.017762 |
| ZNF732    | 4p16.3    | -0.202784956 | 0.006481 | 0.01779  |
| DHPS      | 19p13.13  | 0.20273471   | 0.006494 | 0.017825 |
| BPI       | 20q11.23  | 0.202729471  | 0.006496 | 0.017826 |
| EFCAB5    | 17q11.2   | -0.202726985 | 0.006496 | 0.017826 |
| LAX1      | 1q32.1    | -0.202680309 | 0.006509 | 0.017858 |
| SRRM4     | 12q24.23  | -0.20267498  | 0.00651  | 0.017859 |
| TOX2      | 20q13.12  | -0.202668907 | 0.006512 | 0.017861 |
| URB2      | 1q42.13   | -0.20266357  | 0.006513 | 0.017863 |

|           |           |               |           |           |
|-----------|-----------|---------------|-----------|-----------|
| FCH01     | 19p13. 11 | 0. 202611261  | 0. 006528 | 0. 017899 |
| RIIAD1    | 1q21. 3   | -0. 202607896 | 0. 006528 | 0. 017899 |
| NUP62CL   | Xq22. 3   | 0. 202558952  | 0. 006542 | 0. 017933 |
| LYRM9     | 17q11. 2  | -0. 202542213 | 0. 006546 | 0. 017943 |
| TRIM78P   | 11p15     | 0. 202533857  | 0. 006549 | 0. 017947 |
| TTC30B    | 2q31. 2   | -0. 202500472 | 0. 006558 | 0. 017969 |
| RPL29     | 3p21. 2   | 0. 202487812  | 0. 006561 | 0. 017976 |
| WDR60     | 7q36. 3   | -0. 20244178  | 0. 006574 | 0. 018008 |
| TEL02     | 16p13. 3  | 0. 202416672  | 0. 00658  | 0. 018024 |
| BRD30S    | 9q34. 2   | -0. 202408302 | 0. 006583 | 0. 018027 |
| OXT       | 20p13     | 0. 20240638   | 0. 006583 | 0. 018027 |
| LCMT2     | 15q15. 3  | -0. 202305777 | 0. 006611 | 0. 0181   |
| PRPF18    | 10p13     | 0. 202276484  | 0. 006619 | 0. 018119 |
| TMED4     | 7p13      | -0. 202272299 | 0. 00662  | 0. 018119 |
| GPR173    | Xp11. 22  | -0. 202270207 | 0. 00662  | 0. 018119 |
| LINC00667 | 18p11. 31 | -0. 202266022 | 0. 006622 | 0. 01812  |
| CDS2      | 20p12. 3  | -0. 202261838 | 0. 006623 | 0. 01812  |
| HAPLN3    | 15q26. 1  | 0. 202253468  | 0. 006625 | 0. 018124 |
| DHRS7     | 14q23. 1  | 0. 202247191  | 0. 006627 | 0. 018126 |
| CORT      | 1p36. 22  | -0. 202218321 | 0. 006635 | 0. 018145 |
| NIFK      | 2q14. 3   | 0. 202196974  | 0. 006641 | 0. 018159 |
| DIAPH3    | 13q21. 2  | 0. 202169774  | 0. 006648 | 0. 018177 |
| IL10RA    | 11q23. 3  | -0. 202117465 | 0. 006662 | 0. 018214 |
| DLX3      | 17q21. 33 | 0. 202047382  | 0. 006682 | 0. 018264 |
| RUBCNL    | 13q14. 13 | -0. 202035863 | 0. 006685 | 0. 01827  |
| LINC00526 | 18p11. 31 | -0. 201977277 | 0. 006701 | 0. 01831  |
| CTXN2     | 15q21. 1  | -0. 20197681  | 0. 006701 | 0. 01831  |
| USP26     | Xq26. 2   | 0. 201936857  | 0. 006712 | 0. 018338 |
| GP1BA     | 17p13. 2  | -0. 201907741 | 0. 00672  | 0. 018357 |
| RGN       | Xp11. 3   | -0. 201904045 | 0. 006721 | 0. 018357 |
| KIF18A    | 11p14. 1  | 0. 201901952  | 0. 006722 | 0. 018357 |
| TFCP2     | 12q13. 12 | -0. 201834997 | 0. 006741 | 0. 018405 |
| SVOP      | 12q24. 11 | -0. 201826752 | 0. 006743 | 0. 018409 |
| ZNF606    | 19q13. 43 | -0. 201809888 | 0. 006748 | 0. 018419 |
| CXCR2     | 2q35      | -0. 201804667 | 0. 006749 | 0. 01842  |
| LINC01096 | 4p15. 33  | 0. 201801633  | 0. 00675  | 0. 01842  |
| PDXDC2P-M | 16q22. 1  | 0. 201782688  | 0. 006755 | 0. 018432 |
| MRPL13    | 8q24. 12  | 0. 201765949  | 0. 00676  | 0. 01844  |
| PTP4A3    | 8q24. 3   | -0. 201765949 | 0. 00676  | 0. 01844  |
| SCN2B     | 11q23. 3  | -0. 201728287 | 0. 00677  | 0. 018466 |
| SLMAP     | 3p14. 3   | 0. 201707363  | 0. 006776 | 0. 018479 |
| KCNC1     | 11p15. 1  | -0. 201704884 | 0. 006777 | 0. 018479 |
| NFX1      | 9p13. 3   | -0. 201663424 | 0. 006789 | 0. 018508 |
| ARHGAP17  | 16p12. 1  | -0. 201632038 | 0. 006797 | 0. 01853  |
| AFDN      | 6q27      | -0. 201621576 | 0. 0068   | 0. 018535 |
| CYP27B1   | 12q14. 1  | 0. 201573452  | 0. 006814 | 0. 01857  |
| PSMA1     | 11p15. 2  | 0. 201498127  | 0. 006835 | 0. 018625 |
| ZNF333    | 19p13. 12 | -0. 201487666 | 0. 006838 | 0. 01863  |
| C16ORF54  | 16p11. 2  | -0. 201450003 | 0. 006849 | 0. 018657 |
| SLC25A4   | 4q35. 1   | -0. 201433264 | 0. 006853 | 0. 018667 |
| UPK3BL1   | 7q22. 1   | 0. 20142491   | 0. 006856 | 0. 018671 |
| USPL1     | 13q12. 3  | -0. 201341201 | 0. 006879 | 0. 018733 |
| ANKHD1-EI | 5q31. 3   | -0. 201328646 | 0. 006883 | 0. 01874  |
| FMNL2     | 2q23. 3   | -0. 201315151 | 0. 006887 | 0. 018748 |



|           |            |              |          |          |
|-----------|------------|--------------|----------|----------|
| ZNF639    | 3q26. 33   | -0.201309815 | 0.006888 | 0.018748 |
| DPY19L2P4 | 7q21. 13   | -0.201308121 | 0.006889 | 0.018748 |
| SKP2      | 5p13. 2    | -0.201301446 | 0.006891 | 0.018751 |
| FBXO39    | 17p13. 1   | 0.201288997  | 0.006894 | 0.018758 |
| PWAR4     | 15q11. 2   | -0.201244915 | 0.006907 | 0.018786 |
| CABIN1    | 22q11. 23  | -0.20124286  | 0.006907 | 0.018786 |
| MED20     | 6p21. 1    | -0.20124286  | 0.006907 | 0.018786 |
| POLR1E    | 9p13. 2    | -0.201224029 | 0.006913 | 0.018798 |
| PTCHD3P1  | 10p11. 23  | -0.201215659 | 0.006915 | 0.018802 |
| ZFP36L2   | 2p21       | 0.201194736  | 0.006921 | 0.018816 |
| CCDC85A   | 2p16. 1    | -0.201188459 | 0.006923 | 0.018818 |
| RLN3      | 19p13. 12  | -0.20118255  | 0.006925 | 0.01882  |
| TINF2     | 14q12      | -0.201177997 | 0.006926 | 0.018821 |
| SNHG17    | 20q11. 23  | 0.201052455  | 0.006962 | 0.018916 |
| NIPA2     | 15q11. 2   | 0.201023162  | 0.00697  | 0.018936 |
| SMARCD3   | 7q36. 1    | -0.201006424 | 0.006975 | 0.018946 |
| NIPAL3    | 1p36. 11   | -0.201004331 | 0.006976 | 0.018946 |
| HTR1E     | 6q14. 3    | -0.200992089 | 0.006979 | 0.01895  |
| DOK1      | 2p13. 1    | 0.200991777  | 0.006979 | 0.01895  |
| KBTBD12   | 3q21. 3    | 0.200983413  | 0.006982 | 0.018953 |
| PDCD5     | 19q13. 11  | 0.200981315  | 0.006982 | 0.018953 |
| GLT1D1    | 12q24. 33  | -0.20093225  | 0.006996 | 0.018989 |
| PNISR     | 6q16. 2    | -0.200885067 | 0.00701  | 0.019021 |
| RANGAP1   | 22q13. 2   | 0.200885067  | 0.00701  | 0.019021 |
| MYL6      | 12q13. 2   | 0.200851589  | 0.00702  | 0.019044 |
| RFNG      | 17q25. 3   | 0.200847404  | 0.007021 | 0.019045 |
| MED12     | Xq13. 1    | -0.200841127 | 0.007023 | 0.019047 |
| CCL20     | 2q36. 3    | 0.200820414  | 0.007029 | 0.019061 |
| SELENOS   | 15q26. 3   | 0.200782541  | 0.00704  | 0.019087 |
| GLYATL2   | 11q12. 1   | -0.200780498 | 0.00704  | 0.019087 |
| YWHAE     | 17p13. 3   | -0.200776264 | 0.007041 | 0.019088 |
| XPO4      | 13q12. 11  | -0.20077208  | 0.007043 | 0.019089 |
| ZNF98     | 19p12      | -0.200764291 | 0.007045 | 0.019092 |
| MYOCD     | 17p12      | -0.200718098 | 0.007058 | 0.019123 |
| KRT80     | 12q13. 13  | 0.200717783  | 0.007058 | 0.019123 |
| BTLA      | 3q13. 2    | -0.200715691 | 0.007059 | 0.019123 |
| GABBR2    | 9q22. 33   | -0.200708911 | 0.007061 | 0.019125 |
| CEP83-DT  | 12q22      | -0.200638169 | 0.007081 | 0.019178 |
| BLOC1S3   | 19q13. 32  | 0.200617245  | 0.007088 | 0.019192 |
| POLE2     | 14q21. 3   | 0.200593288  | 0.007095 | 0.019209 |
| PDAP1     | 7q22. 1    | 0.20055029   | 0.007107 | 0.01924  |
| OGFRL1    | 6q13       | -0.200544013 | 0.007109 | 0.019242 |
| CHD2      | 15q26. 1   | -0.200535643 | 0.007111 | 0.019246 |
| FGL1      | 8p22       | -0.200523509 | 0.007115 | 0.019253 |
| BCAP31    | Xq28       | 0.200504258  | 0.007121 | 0.019266 |
| DNM1      | 9q34. 11   | -0.200474965 | 0.007129 | 0.019287 |
| IFT52     | 20q13. 12  | -0.200454041 | 0.007135 | 0.0193   |
| ASAP1     | 8q24. 21-c | -0.200449857 | 0.007136 | 0.019301 |
| FCAR      | 19q13. 42  | -0.200419446 | 0.007145 | 0.019323 |
| HSD17B7P2 | 10p11. 1   | 0.200395455  | 0.007152 | 0.019339 |
| FHL5      | 6q16. 1    | -0.200382901 | 0.007156 | 0.019346 |
| C5AR2     | 19q13. 32  | 0.200377775  | 0.007158 | 0.019348 |
| CRYM-AS1  | 16p12. 2   | 0.200270141  | 0.007189 | 0.019431 |
| SLCO2B1   | 11q13. 4   | -0.20022179  | 0.007204 | 0.019467 |

|           |           |              |          |          |
|-----------|-----------|--------------|----------|----------|
| STUB1     | 16p13.3   | 0.200215513  | 0.007205 | 0.019469 |
| BTBD7     | 14q32.12  | -0.200211328 | 0.007207 | 0.01947  |
| FAM178B   | 2q11.2    | 0.200202961  | 0.007209 | 0.019474 |
| ZNF100    | 19p12     | -0.200194694 | 0.007212 | 0.019478 |
| USP20     | 9q34.11   | -0.200190404 | 0.007213 | 0.019479 |
| GATA2     | 3q21.3    | -0.20017785  | 0.007217 | 0.019486 |
| KRT17P5   | 17p11.2   | 0.200173662  | 0.007218 | 0.019486 |
| MRGPRX2   | 11p15.1   | -0.200170971 | 0.007219 | 0.019486 |
| TMED10P1  | 8q24.3    | -0.200166447 | 0.00722  | 0.019487 |
| USH1C     | 11p15.1   | 0.200154834  | 0.007223 | 0.019494 |
| CENPBD1P1 | 19q13.43  | -0.200146465 | 0.007226 | 0.019498 |
| ACTR1B    | 2q11.2    | 0.200117172  | 0.007235 | 0.019519 |
| STK32B    | 4p16.2    | -0.20010263  | 0.007239 | 0.019528 |
| TEX264    | 3p21.2    | 0.200083694  | 0.007244 | 0.019537 |
| LMTK2     | 7q21.3    | -0.200081602 | 0.007245 | 0.019537 |
| U2AF1     | 21q22.3   | 0.200081602  | 0.007245 | 0.019537 |
| PIGP      | 21q22.13  | -0.200077417 | 0.007246 | 0.019538 |
| RASGRP3   | 2p22.3    | -0.199995815 | 0.007271 | 0.0196   |
| BRD8      | 5q31.2    | -0.199966522 | 0.007279 | 0.019621 |
| TSPAN19   | 12q21.31  | -0.199958542 | 0.007282 | 0.019625 |
| FOXO3     | 6q21      | -0.199945599 | 0.007286 | 0.019633 |
| ATCAY     | 19p13.3   | -0.199922582 | 0.007292 | 0.019645 |
| RCC1      | 1p35.3    | 0.19992049   | 0.007293 | 0.019645 |
| SCGB1C1   | 11p15.5   | -0.199920187 | 0.007293 | 0.019645 |
| HSPBP1    | 19q13.42  | 0.199912121  | 0.007296 | 0.019649 |
| MCM3AP    | 21q22.3   | -0.199897475 | 0.0073   | 0.019658 |
| FAM210B   | 20q13.2   | -0.199872366 | 0.007307 | 0.019676 |
| FLRT2     | 14q31.3   | -0.19984935  | 0.007314 | 0.019692 |
| SLC18A1   | 8p21.3    | -0.199822137 | 0.007322 | 0.019711 |
| CCDC183-A | 9q34.3    | -0.199797041 | 0.00733  | 0.019729 |
| TMEM160   | 19q13.32  | 0.199769841  | 0.007338 | 0.019748 |
| AKR7L     | 1p36.13 1 | 0.199757287  | 0.007342 | 0.019756 |
| PPP6R1    | 19q13.42  | 0.199744732  | 0.007346 | 0.019763 |
| MYO1C     | 17p13.3   | 0.199709162  | 0.007356 | 0.019789 |
| IRF2BP2   | 1q42.3    | -0.199700793 | 0.007359 | 0.019793 |
| FBLN7     | 2q13-q14. | -0.199661038 | 0.007371 | 0.019823 |
| TBC1D3P2  | 17q23.2   | 0.19964112   | 0.007377 | 0.019836 |
| TMEM100   | 17q22     | -0.19963593  | 0.007379 | 0.019838 |
| RASSF8    | 12p12.1   | -0.199631745 | 0.00738  | 0.019839 |
| BPIFB4    | 20q11.21  | -0.199621942 | 0.007383 | 0.019844 |
| STOX2     | 4q35.1    | -0.199587806 | 0.007393 | 0.019869 |
| RSAD1     | 17q21.33  | -0.199575252 | 0.007397 | 0.019876 |
| CDH8      | 16q21     | -0.199541257 | 0.007407 | 0.019901 |
| SHISA9    | 16p13.12  | -0.199534659 | 0.007409 | 0.019902 |
| ARL3      | 10q24.32  | -0.199533404 | 0.00741  | 0.019902 |
| LINC00852 | 3p25.3    | -0.199476911 | 0.007427 | 0.019946 |
| GREB1     | 2p25.1    | -0.199472726 | 0.007428 | 0.019947 |
| APAF1     | 12q23.1   | -0.199464357 | 0.00743  | 0.019951 |
| DPP8      | 15q22.31  | -0.199455987 | 0.007433 | 0.019955 |
| C5ORF24   | 5q31.1    | -0.199393217 | 0.007452 | 0.020003 |
| MYH1      | 17p13.1   | -0.19931693  | 0.007475 | 0.020063 |
| MEIOB     | 16p13.3   | -0.199268426 | 0.00749  | 0.020098 |
| ZNF317    | 19p13.2   | -0.199267675 | 0.00749  | 0.020098 |
| TAF13     | 1p13.3    | -0.199252087 | 0.007495 | 0.020108 |

|           |           |              |          |          |
|-----------|-----------|--------------|----------|----------|
| PUSL1     | 1p36.33   | 0.199244659  | 0.007497 | 0.020112 |
| PYG02     | 1q21.3    | 0.199234197  | 0.007501 | 0.020118 |
| IKZF1     | 7p12.2    | -0.199114933 | 0.007537 | 0.020213 |
| FAM184B   | 4p15.32-f | -0.199109714 | 0.007539 | 0.020215 |
| ANKZF1    | 2q35      | 0.199043793  | 0.007559 | 0.020266 |
| MAPRE1    | 20q11.21  | -0.199039608 | 0.00756  | 0.020267 |
| TMEM259   | 19p13.3   | 0.199001946  | 0.007572 | 0.020296 |
| C1S       | 12p13.31  | -0.198993576 | 0.007575 | 0.0203   |
| CCS       | 11q13.2   | 0.198976838  | 0.00758  | 0.020307 |
| RLIM      | Xq13.2    | -0.198976838 | 0.00758  | 0.020307 |
| KCTD6     | 3p14.3    | -0.198974745 | 0.007581 | 0.020307 |
| CACNA1I   | 22q13.1   | -0.198945452 | 0.00759  | 0.020328 |
| NPY1R     | 4q32.2    | -0.19894336  | 0.00759  | 0.020328 |
| UBE2N     | 12q22     | -0.198930806 | 0.007594 | 0.020333 |
| ERF       | 19q13.2   | 0.198930806  | 0.007594 | 0.020333 |
| RPL13AP2C | 12p13.1   | 0.198918252  | 0.007598 | 0.02034  |
| FDXR      | 17q25.1   | 0.198874312  | 0.007612 | 0.020374 |
| SPATA4    | 4q34.2    | -0.198849956 | 0.007619 | 0.020392 |
| DDX46     | 5q31.1    | -0.198840834 | 0.007622 | 0.020396 |
| ZNF675    | 19p12     | -0.198767706 | 0.007645 | 0.020455 |
| BRK1      | 3p25.3    | 0.198752955  | 0.007649 | 0.020464 |
| MROH1     | 8q24.3    | 0.198740401  | 0.007653 | 0.020472 |
| HMMR      | 5q34      | 0.198696462  | 0.007667 | 0.020506 |
| NOL11     | 17q24.2   | -0.198690185 | 0.007669 | 0.020507 |
| JAK2      | 9p24.1    | -0.198688092 | 0.00767  | 0.020507 |
| BRD3      | 9q34.2    | -0.198671354 | 0.007675 | 0.020519 |
| STON1     | 2p16.3    | -0.198665076 | 0.007677 | 0.020521 |
| TLR7      | Xp22.2    | -0.19865043  | 0.007681 | 0.020531 |
| BTF3L4    | 1p32.3    | -0.198621137 | 0.007691 | 0.020552 |
| SLC31A2   | 9q32      | -0.198583475 | 0.007702 | 0.020581 |
| RPS27L    | 15q22.2   | 0.198573013  | 0.007706 | 0.020587 |
| ANK3      | 10q21.2   | -0.198568828 | 0.007707 | 0.020588 |
| NOM1      | 7q36.3    | -0.198556274 | 0.007711 | 0.020593 |
| SKIV2L    | 6p21.33   | 0.198556274  | 0.007711 | 0.020593 |
| DNAJC25   | 9q31.3    | -0.198524889 | 0.007721 | 0.020617 |
| SSTR3     | 22q13.1   | -0.198516659 | 0.007723 | 0.020621 |
| MND1      | 4q31.3    | 0.198512334  | 0.007725 | 0.020622 |
| MYO3A     | 10p12.1   | -0.198501865 | 0.007728 | 0.020628 |
| OSBPL2    | 20q13.33  | 0.198449564  | 0.007744 | 0.020669 |
| SNORA2B   | 12q13.11  | -0.198435926 | 0.007749 | 0.020677 |
| SLC2A4    | 17p13.1   | -0.198432825 | 0.00775  | 0.020677 |
| GABRA5    | 15q12     | -0.198424637 | 0.007752 | 0.020681 |
| ACSS3     | 12q21.31  | -0.198416086 | 0.007755 | 0.020686 |
| IL1RAPL2  | Xq22.3    | 0.19836273   | 0.007772 | 0.020728 |
| STRBP     | 9q33.3    | -0.198315653 | 0.007787 | 0.020765 |
| CADM3     | 1q23.2    | -0.198280083 | 0.007798 | 0.020792 |
| NMBR      | 6q24.1    | -0.198259494 | 0.007805 | 0.020807 |
| DNM1P35   | 15q24.2   | 0.198246605  | 0.007809 | 0.020815 |
| WASF2     | 1p36.11   | -0.198234051 | 0.007813 | 0.020823 |
| TMEM196   | 7p21.1    | -0.198224627 | 0.007816 | 0.020828 |
| CBX1      | 17q21.32  | -0.198167096 | 0.007834 | 0.020874 |
| HSD11B1L  | 19p13.3   | 0.198139895  | 0.007843 | 0.020894 |
| ABCC10    | 6p21.1    | 0.198133618  | 0.007845 | 0.020897 |
| TTC8      | 14q31.3   | -0.198129433 | 0.007846 | 0.020898 |

|          |           |              |          |          |
|----------|-----------|--------------|----------|----------|
| ZSWIM1   | 20q13.12  | 0.198125248  | 0.007847 | 0.020898 |
| OR52I2   | 11p15.4   | -0.198027174 | 0.007879 | 0.020979 |
| HDAC10   | 22q13.33  | 0.198018538  | 0.007881 | 0.020984 |
| ATP1A2   | 1q23.2    | -0.198008076 | 0.007885 | 0.02099  |
| FAR1     | 11p15.3   | 0.197991338  | 0.00789  | 0.020998 |
| JPH4     | 14q11.2   | -0.197991338 | 0.00789  | 0.020998 |
| ADGRE1   | 19p13.3-1 | -0.197987567 | 0.007891 | 0.020998 |
| RPS2     | 16p13.3   | 0.197985061  | 0.007892 | 0.020998 |
| STK26    | Xq26.2    | 0.197920198  | 0.007913 | 0.021051 |
| RGS12    | 4p16.3    | 0.197834411  | 0.00794  | 0.021121 |
| MYBL2    | 20q13.12  | 0.197750717  | 0.007967 | 0.02119  |
| ABCG5    | 2p21      | -0.19771907  | 0.007978 | 0.021214 |
| RAVER2   | 1p31.3    | -0.197717239 | 0.007978 | 0.021214 |
| ANXA4    | 2p13.3    | 0.197683761  | 0.007989 | 0.02124  |
| PSMD14   | 2q24.2    | 0.197667022  | 0.007995 | 0.02125  |
| CMPK2    | 2p25.2    | 0.19766493   | 0.007995 | 0.02125  |
| IFNL3    | 19q13.2   | 0.197649647  | 0.008    | 0.021261 |
| BMPRI1A  | 10q23.2   | -0.19758542  | 0.008021 | 0.021313 |
| C22ORF15 | 22q11.23  | -0.197577422 | 0.008024 | 0.021315 |
| CRNKL1   | 20p11.23  | -0.197577051 | 0.008024 | 0.021315 |
| AKR1B1   | 7q33      | -0.197566589 | 0.008027 | 0.021321 |
| NRK      | Xq22.3    | -0.19754985  | 0.008033 | 0.021332 |
| DMRTC1   | Xq13.1    | -0.197542259 | 0.008035 | 0.021336 |
| CSF3     | 17q21.1   | -0.197487041 | 0.008053 | 0.021381 |
| TMEM177  | 2q14.2    | 0.197472433  | 0.008058 | 0.021391 |
| SH3GLB2  | 9q34.11   | 0.197468248  | 0.008059 | 0.021391 |
| PIM2     | Xp11.23   | -0.197466156 | 0.00806  | 0.021391 |
| ADAMTS16 | 5p15.32   | -0.197430586 | 0.008072 | 0.021419 |
| GFRA3    | 5q31.2    | -0.197421274 | 0.008075 | 0.021424 |
| GLB1L    | 2q35      | -0.197284121 | 0.00812  | 0.02154  |
| CAPN15   | 16p13.3   | 0.197267382  | 0.008125 | 0.021551 |
| PPP1R8   | 1p35.3    | -0.19726529  | 0.008126 | 0.021551 |
| NR4A3    | 9q31.1    | -0.197259013 | 0.008128 | 0.021553 |
| RIN2     | 20p11.23  | -0.19725692  | 0.008129 | 0.021553 |
| TBC1D24  | 16p13.3   | -0.197235997 | 0.008135 | 0.021568 |
| CXORF58  | Xp22.11   | -0.197223257 | 0.00814  | 0.021575 |
| ATF7IP   | 12p13.1   | -0.19722135  | 0.00814  | 0.021575 |
| SLC5A12  | 11p14.2   | -0.197194902 | 0.008149 | 0.021593 |
| SPSB3    | 16p13.3   | 0.197192057  | 0.00815  | 0.021593 |
| HIVEP2   | 6q24.2    | -0.197191114 | 0.00815  | 0.021593 |
| CLPP     | 19p13.3   | 0.197141841  | 0.008166 | 0.021633 |
| HSD17B14 | 19q13.33  | -0.197137656 | 0.008168 | 0.021633 |
| PRDM5    | 4q27      | -0.197135564 | 0.008169 | 0.021633 |
| GPR15    | 3q11.2    | -0.197128402 | 0.008171 | 0.021636 |
| DGCR2    | 22q11.21  | 0.197102086  | 0.00818  | 0.021657 |
| MYO5B    | 18q21.1   | 0.19708744   | 0.008184 | 0.021665 |
| NDUFS3   | 11p11.2   | 0.197085347  | 0.008185 | 0.021665 |
| TP53TG1  | 7q21.12   | 0.19705187   | 0.008196 | 0.021692 |
| ASPH     | 8q12.3    | 0.197030946  | 0.008203 | 0.021707 |
| AFG1L    | 6q21      | -0.197024669 | 0.008205 | 0.02171  |
| SMIM6    | 17q25.1   | 0.197005838  | 0.008211 | 0.021724 |
| RPH3AL   | 17p13.3   | -0.196953529 | 0.008229 | 0.021767 |
| PUM1     | 1p35.2    | -0.196924236 | 0.008239 | 0.02179  |
| C21ORF62 | 21q22.11  | -0.196890758 | 0.00825  | 0.021814 |

|           |           |              |          |          |
|-----------|-----------|--------------|----------|----------|
| NRG3      | 10q23.1   | 0.196889815  | 0.00825  | 0.021814 |
| PCDHGB3   | 5q31.3    | -0.196882492 | 0.008253 | 0.021818 |
| CACNG7    | 19q13.42  | -0.196858804 | 0.00826  | 0.021836 |
| MGC16275  | 17q25.1   | -0.196827044 | 0.008271 | 0.021861 |
| PON2      | 7q21.3    | 0.196802879  | 0.008279 | 0.021879 |
| PRRT3     | 3p25.3    | -0.196765217 | 0.008292 | 0.02191  |
| EEF1D     | 8q24.3    | 0.196752663  | 0.008296 | 0.021918 |
| ZFP90     | 16q22.1   | -0.196738016 | 0.008301 | 0.021927 |
| TWNK      | 10q24.31  | -0.196735924 | 0.008302 | 0.021927 |
| CDHR1     | 10q23.1   | -0.196709752 | 0.00831  | 0.021947 |
| WDR83     | 19p13.13  | 0.196696169  | 0.008315 | 0.021956 |
| TMEM30B   | 14q23.1   | 0.196683615  | 0.008319 | 0.021965 |
| IRX3      | 16q12.2   | 0.196671061  | 0.008323 | 0.021973 |
| MAGI2     | 7q21.11   | -0.196654322 | 0.008329 | 0.021985 |
| MICALL1   | 22q13.1   | 0.19664386   | 0.008332 | 0.021991 |
| TMEM94    | 17q25.1   | -0.196631306 | 0.008337 | 0.022    |
| AKTIP     | 16q12.2   | -0.196553889 | 0.008363 | 0.022065 |
| SRSF6     | 20q13.11  | -0.196507857 | 0.008378 | 0.022104 |
| ACADS     | 12q24.31  | 0.196503672  | 0.00838  | 0.022104 |
| PCF11     | 11q14.1   | -0.196486933 | 0.008385 | 0.022116 |
| NFIB      | 9p23-p22. | -0.196453456 | 0.008397 | 0.022143 |
| EP300     | 22q13.2   | -0.196440901 | 0.008401 | 0.022151 |
| PPIC      | 5q23.2    | 0.196438809  | 0.008402 | 0.022151 |
| CHCHD10   | 22q11.23  | 0.196415793  | 0.008409 | 0.022168 |
| PAPPA     | 9q33.1    | -0.19639487  | 0.008417 | 0.022183 |
| OR12D2    | 6p22.1    | -0.196392327 | 0.008417 | 0.022183 |
| C16ORF72  | 16p13.2   | -0.196388592 | 0.008419 | 0.022184 |
| GLRX3     | 10q26.3   | 0.196359299  | 0.008429 | 0.022207 |
| MRPL58    | 17q25.1   | 0.196334191  | 0.008437 | 0.022227 |
| ZNF385D   | 3p24.3    | -0.196317452 | 0.008443 | 0.022239 |
| PCDHGA7   | 5q31.3    | -0.196206557 | 0.008481 | 0.022335 |
| PIGY      | 4q22.1    | -0.196202373 | 0.008482 | 0.022336 |
| CD2BP2    | 16p11.2   | 0.196194003  | 0.008485 | 0.022341 |
| GIT1      | 17q11.2   | 0.196185634  | 0.008488 | 0.022345 |
| SSTR4     | 20p11.21  | -0.196161897 | 0.008496 | 0.022364 |
| NKX6-1    | 4q21.23   | -0.196150044 | 0.0085   | 0.022371 |
| C22ORF42  | 22q12.3   | -0.196082525 | 0.008523 | 0.022429 |
| AMDHD2    | 16p13.3   | 0.196058     | 0.008532 | 0.022449 |
| GPT       | 8q24.3    | 0.196049631  | 0.008534 | 0.022453 |
| TPTEP1    | 22q11.1   | -0.196020338 | 0.008544 | 0.022477 |
| IL7R      | 5p13.2    | -0.195898981 | 0.008586 | 0.022584 |
| KDM5B     | 1q32.1    | 0.195892704  | 0.008588 | 0.022586 |
| LHX4      | 1q25.2    | -0.195871182 | 0.008596 | 0.022603 |
| LINC00494 | 20q13.13  | -0.195839585 | 0.008607 | 0.022629 |
| OXLD1     | 17q25.3   | 0.195832026  | 0.008609 | 0.022633 |
| GAS6      | 13q34     | 0.195827841  | 0.008611 | 0.022634 |
| RANBP9    | 6p23      | -0.195817379 | 0.008614 | 0.022638 |
| SPRR2D    | 1q21.3    | 0.195814427  | 0.008616 | 0.022638 |
| SETD2     | 3p21.31   | -0.195813194 | 0.008616 | 0.022638 |
| GOLM1     | 9q21.33   | 0.195804825  | 0.008619 | 0.022642 |
| TEKT2     | 1p34.3    | -0.195802733 | 0.00862  | 0.022642 |
| SMIM15    | 5q12.1    | 0.195796456  | 0.008622 | 0.022644 |
| DONSON    | 21q22.11  | 0.195758793  | 0.008635 | 0.022676 |
| BIRC6     | 2p22.3    | -0.195748331 | 0.008638 | 0.022682 |

|           |           |              |          |          |
|-----------|-----------|--------------|----------|----------|
| CCDC171   | 9p22.3    | -0.195745295 | 0.008639 | 0.022682 |
| THRSP     | 11q14.1   | -0.195725098 | 0.008647 | 0.022697 |
| IFIT1     | 10q23.31  | 0.195714854  | 0.00865  | 0.022704 |
| DAZL      | 3p24.3    | -0.195643684 | 0.008675 | 0.022765 |
| NHP2      | 5q35.3    | 0.195641621  | 0.008676 | 0.022765 |
| MEIS2     | 15q14     | -0.195624882 | 0.008681 | 0.022777 |
| STAU2     | 8q21.11   | -0.195593497 | 0.008692 | 0.022803 |
| PABPN1L   | 16q24.3   | -0.195589067 | 0.008694 | 0.022804 |
| OR2T4     | 1q44      | -0.195568319 | 0.008701 | 0.02282  |
| INE2      | Xp22.2    | -0.195469575 | 0.008736 | 0.022907 |
| KANK3     | 19p13.2   | -0.195430293 | 0.008749 | 0.022941 |
| LCP2      | 5q35.1    | -0.195384261 | 0.008766 | 0.02298  |
| HNF1B     | 17q12     | 0.195371707  | 0.00877  | 0.022989 |
| KCTD4     | 13q14.12- | -0.195363946 | 0.008773 | 0.022993 |
| ST8SIA3   | 18q21.31  | -0.195293734 | 0.008798 | 0.023055 |
| LGI3      | 8p21.3    | -0.195277502 | 0.008803 | 0.023067 |
| PSMA7     | 20q13.33  | 0.195269182  | 0.008806 | 0.023071 |
| SBK1      | 16p12.1   | -0.195202226 | 0.00883  | 0.02313  |
| AKAIN1    | 18p11.31  | -0.195168346 | 0.008842 | 0.023159 |
| CATSPERB  | 14q32.12  | 0.195074593  | 0.008875 | 0.023242 |
| CFP       | Xp11.23   | -0.1950725   | 0.008876 | 0.023242 |
| ASPRV1    | 2p13.3    | -0.195053669 | 0.008883 | 0.023256 |
| UBASH3A   | 21q22.3   | -0.195047392 | 0.008885 | 0.023259 |
| LRRC41    | 1p34.1-p5 | -0.195039022 | 0.008888 | 0.023264 |
| EIF3B     | 7p22.3    | 0.195032745  | 0.00889  | 0.023266 |
| PAM16     | 16p13.3   | 0.195022284  | 0.008894 | 0.023273 |
| B2M       | 15q21.1   | 0.195018099  | 0.008895 | 0.023274 |
| DND1      | 5q31.3    | 0.194969975  | 0.008912 | 0.023316 |
| FHL3      | 1p34.3    | 0.194959513  | 0.008916 | 0.023323 |
| CSF1R     | 5q32      | -0.194953236 | 0.008918 | 0.023325 |
| HRNR      | 1q21.3    | -0.194940682 | 0.008923 | 0.023334 |
| HYAL3     | 3p21.31   | 0.194936497  | 0.008924 | 0.023335 |
| PAQR9     | 3q23      | 0.194918349  | 0.008931 | 0.023349 |
| GABRB1    | 4p12      | -0.194902707 | 0.008937 | 0.02336  |
| TBC1D3H   | 17q12     | 0.194888373  | 0.008942 | 0.023371 |
| PYCR3     | 8q24.3    | 0.194877911  | 0.008945 | 0.023376 |
| TUBB      | 6p21.33   | 0.194875819  | 0.008946 | 0.023376 |
| TRAPPC11  | 4q35.1    | -0.194866505 | 0.008949 | 0.023379 |
| ABCC8     | 11p15.1   | -0.194865357 | 0.00895  | 0.023379 |
| SH3KBP1   | Xp22.12   | 0.194863264  | 0.008951 | 0.023379 |
| ZNF423    | 16q12.1   | -0.194854895 | 0.008954 | 0.023384 |
| AZU1      | 19p13.3   | 0.194807158  | 0.008971 | 0.023425 |
| RGPD6     | 2q13      | -0.194763482 | 0.008986 | 0.023463 |
| SCD5      | 4q21.22   | -0.194737723 | 0.008996 | 0.023484 |
| ZAR1      | 4p11      | 0.194726046  | 0.009    | 0.023492 |
| LINC02716 | 11p11.2   | -0.194704672 | 0.009008 | 0.023509 |
| FAM189A1  | 15q13.1   | -0.194685414 | 0.009015 | 0.023524 |
| ZCCHC10   | 5q31.1    | -0.194679137 | 0.009017 | 0.023527 |
| MAST2     | 1p34.1    | 0.194649844  | 0.009027 | 0.023548 |
| RPAP3     | 12q13.11  | -0.194649844 | 0.009027 | 0.023548 |
| CAMK2N2   | 3q27.1    | -0.194643567 | 0.00903  | 0.023548 |
| POLA2     | 11q13.1   | 0.194643567  | 0.00903  | 0.023548 |
| MAPK8IP1F | 17q21.31  | -0.194631013 | 0.009034 | 0.023557 |
| CCDC80    | 3q13.2    | -0.194624736 | 0.009036 | 0.02356  |

|           |          |              |          |          |
|-----------|----------|--------------|----------|----------|
| NPM3      | 10q24.32 | 0.19460172   | 0.009045 | 0.023577 |
| OR14I1    | 1q44     | -0.194600403 | 0.009045 | 0.023577 |
| FAM200A   | 7q22.1   | -0.19459335  | 0.009048 | 0.02358  |
| CCDC137   | 17q25.3  | 0.194580796  | 0.009052 | 0.023589 |
| CLMP      | 11q24.1  | -0.194576612 | 0.009054 | 0.02359  |
| DPYSL5    | 2p23.3   | -0.194573449 | 0.009055 | 0.02359  |
| ACYP1     | 14q24.3  | 0.194553697  | 0.009062 | 0.023606 |
| A2M       | 12p13.31 | -0.194545226 | 0.009065 | 0.02361  |
| IL6       | 7p15.3   | -0.194536857 | 0.009068 | 0.023615 |
| KCNJ12    | 17p11.2  | -0.194528589 | 0.009071 | 0.023617 |
| CHODL     | 21q21.1  | -0.194528011 | 0.009071 | 0.023617 |
| ALPK1     | 4q25     | 0.194511749  | 0.009077 | 0.02363  |
| MRRF      | 9q33.2   | 0.19445944   | 0.009096 | 0.023673 |
| TMEM38A   | 19p13.11 | 0.19445944   | 0.009096 | 0.023673 |
| ZER1      | 9q34.11  | -0.194442701 | 0.009102 | 0.023686 |
| NRIP3     | 11p15.4  | 0.194430147  | 0.009107 | 0.023695 |
| GPR119    | Xq26.1   | -0.194418983 | 0.009111 | 0.023702 |
| PCDHB15   | 5q31.3   | -0.194411315 | 0.009114 | 0.023706 |
| NES       | 1q23.1   | -0.194396669 | 0.009119 | 0.023717 |
| SAMD3     | 6q23.1   | -0.194390392 | 0.009121 | 0.02372  |
| MCMDC2    | 8q13.1   | -0.194342268 | 0.009139 | 0.023762 |
| PLPP5     | 8p11.23  | -0.194333898 | 0.009142 | 0.023767 |
| FOXN4     | 12q24.11 | -0.194323436 | 0.009146 | 0.023774 |
| TNNT3     | 11p15.5  | -0.19426028  | 0.009169 | 0.023831 |
| FLJ34503  | 6q21     | -0.194239324 | 0.009177 | 0.023848 |
| OXCT2     | 1p34.2   | -0.194212542 | 0.009186 | 0.02387  |
| HSPA1A    | 6p21.33  | 0.19420208   | 0.00919  | 0.023877 |
| KIF14     | 1q32.1   | 0.194162325  | 0.009205 | 0.023911 |
| PELP1     | 17p13.2  | -0.194160233 | 0.009206 | 0.023911 |
| SYT1      | 12q21.2  | -0.194145586 | 0.009211 | 0.023922 |
| COMP      | 19p13.11 | 0.194108025  | 0.009225 | 0.023954 |
| THRA      | 17q21.1  | -0.194087    | 0.009233 | 0.023971 |
| RBX1      | 22q13.2  | 0.194049338  | 0.009246 | 0.024004 |
| CX3CR1    | 3p22.2   | -0.194043061 | 0.009249 | 0.024007 |
| ZNF514    | 2q11.1   | 0.194036784  | 0.009251 | 0.02401  |
| SLC66A3   | 2p25.1   | 0.194030507  | 0.009253 | 0.024013 |
| NLRX1     | 11q23.3  | 0.194017952  | 0.009258 | 0.024022 |
| CAMK2G    | 10q22.2  | 0.194007491  | 0.009262 | 0.024029 |
| TRAT1     | 3q13.13  | -0.194001619 | 0.009264 | 0.024031 |
| NDUFA10   | 2q37.3   | 0.193992844  | 0.009267 | 0.024037 |
| TAF2      | 8q24.12  | -0.19398029  | 0.009272 | 0.024046 |
| ECM2      | 9q22.31  | -0.193971921 | 0.009275 | 0.02405  |
| ETFB      | 19q13.41 | 0.193967736  | 0.009277 | 0.024051 |
| NCDN      | 1p34.3   | -0.193936351 | 0.009288 | 0.024078 |
| TRIM45    | 1p13.1   | 0.193923796  | 0.009293 | 0.024087 |
| LOC100130 | 12q24.33 | 0.19388374   | 0.009308 | 0.024123 |
| SERPINA11 | 14q32.13 | -0.193879181 | 0.009309 | 0.024124 |
| LCOR      | 10q24.1  | -0.193806624 | 0.009336 | 0.024191 |
| RASGEF1C  | 5q35.3   | -0.193721794 | 0.009368 | 0.024269 |
| ISLR      | 15q24.1  | 0.193716653  | 0.00937  | 0.024271 |
| ZNF773    | 19q13.43 | -0.19369573  | 0.009378 | 0.024288 |
| LOC401052 | 3p25.3   | 0.193685268  | 0.009382 | 0.024295 |
| EVC2      | 4p16.2   | -0.19365179  | 0.009394 | 0.024324 |
| P2RY10    | Xq21.1   | -0.193595296 | 0.009415 | 0.024374 |

|           |           |              |          |          |
|-----------|-----------|--------------|----------|----------|
| SEZ6      | 17q11.2   | -0.193594387 | 0.009416 | 0.024374 |
| TWIST1    | 7p21.1    | 0.193551357  | 0.009432 | 0.024412 |
| BBS9      | 7p14.3    | -0.193505325 | 0.009449 | 0.024454 |
| RGR       | 10q23.1   | -0.193495498 | 0.009453 | 0.02446  |
| MTM1      | Xq28      | -0.193467663 | 0.009463 | 0.024484 |
| EIF2AK1   | 7p22.1    | 0.193455108  | 0.009468 | 0.024493 |
| NUCKS1    | 1q32.1    | -0.193436277 | 0.009475 | 0.024506 |
| RASA4CP   | 7p13      | -0.193434185 | 0.009476 | 0.024506 |
| TNS1      | 2q35      | -0.193432093 | 0.009477 | 0.024506 |
| MRPL22    | 5q33.2    | 0.193392338  | 0.009492 | 0.024542 |
| CPSF4L    | 17q25.1   | -0.193365733 | 0.009502 | 0.024565 |
| PWWP2A    | 5q33.3    | -0.193356768 | 0.009505 | 0.02457  |
| YBX2      | 17p13.1   | -0.193351273 | 0.009507 | 0.024572 |
| AURKA     | 20q13.2   | 0.193340029  | 0.009511 | 0.02458  |
| PRDX4     | Xp22.11   | -0.193321198 | 0.009518 | 0.024595 |
| DCHS1     | 11p15.4   | -0.193317013 | 0.00952  | 0.024596 |
| ODF2      | 9q34.11   | -0.193285628 | 0.009532 | 0.024624 |
| ALMS1P1   | 2p13.1    | -0.193267125 | 0.009539 | 0.024639 |
| INPPL1    | 11q13.4   | 0.193262612  | 0.009541 | 0.02464  |
| VGLL4     | 3p25.3-p2 | 0.193245873  | 0.009547 | 0.024653 |
| MBTPS1    | 16q23.3-c | -0.193233319 | 0.009552 | 0.024662 |
| MAST3     | 19p13.11  | -0.193187287 | 0.009569 | 0.024704 |
| FADS2     | 11q12.2   | -0.193160086 | 0.00958  | 0.024728 |
| HCLS1     | 3q13.33   | -0.193143347 | 0.009586 | 0.024741 |
| RAVER1    | 19p13.2   | 0.193114054  | 0.009597 | 0.024767 |
| PLEKH02   | 15q22.31  | -0.193103593 | 0.009601 | 0.024774 |
| GRIK4     | 11q23.3   | -0.193078136 | 0.009611 | 0.024796 |
| C15ORF39  | 15q24.2   | 0.19306593   | 0.009616 | 0.024804 |
| TNFAIP8L3 | 15q21.2   | -0.193049191 | 0.009622 | 0.024818 |
| SUSD2     | 22q11.23  | 0.193040822  | 0.009625 | 0.024823 |
| ING5      | 2q37.3    | -0.193032452 | 0.009628 | 0.024827 |
| ROM01     | 20q11.22  | 0.19303036   | 0.009629 | 0.024827 |
| RFPL2     | 22q12.3   | -0.192942075 | 0.009663 | 0.024909 |
| UACA      | 15q23     | 0.192940389  | 0.009664 | 0.024909 |
| MTHFD2    | 2p13.1    | -0.192921558 | 0.009671 | 0.024921 |
| RASGRF2   | 5q14.1    | -0.192921558 | 0.009671 | 0.024921 |
| SCAMP4    | 19p13.3   | 0.192911096  | 0.009675 | 0.024928 |
| LINC00938 | 12q12     | -0.192865064 | 0.009692 | 0.024971 |
| AFAP1L1   | 5q32      | -0.192860879 | 0.009694 | 0.024972 |
| PRR5      | 22q13.31  | 0.192842048  | 0.009701 | 0.024987 |
| NLRP4     | 19q13.43  | -0.192836001 | 0.009704 | 0.02499  |
| PDGFD     | 11q22.3   | -0.192814847 | 0.009712 | 0.025008 |
| ATP11C    | Xq27.1    | -0.192802293 | 0.009717 | 0.025017 |
| SEZ6L     | 22q12.1   | -0.192789701 | 0.009721 | 0.025026 |
| FMOD      | 1q32.1    | -0.192743707 | 0.009739 | 0.025068 |
| FLJ13224  | 12p11.21  | -0.192739599 | 0.009741 | 0.025068 |
| NDFIP1    | 5q31.3    | -0.19273743  | 0.009742 | 0.025068 |
| MYDGF     | 19p13.3   | 0.192718599  | 0.009749 | 0.025084 |
| MAMSTR    | 19q13.33  | 0.192691499  | 0.009759 | 0.025108 |
| CLCC1     | 1p13.3    | -0.192683029 | 0.009763 | 0.025113 |
| POGLUT1   | 3q13.33   | -0.192618166 | 0.009788 | 0.025174 |
| FOXA2     | 20p11.21  | -0.192580503 | 0.009802 | 0.025209 |
| CCDC90B   | 11q14.1   | 0.192567949  | 0.009807 | 0.025218 |
| GP9       | 3q21.3    | -0.192560543 | 0.00981  | 0.025222 |



|           |           |              |          |          |
|-----------|-----------|--------------|----------|----------|
| SGCB      | 4q12      | -0.19255121  | 0.009814 | 0.025227 |
| ENPP1     | 6q23.2    | -0.192549118 | 0.009815 | 0.025227 |
| NOTCH1    | 9q34.3    | -0.192534472 | 0.00982  | 0.025238 |
| MRPL15    | 8q11.23   | 0.192473793  | 0.009844 | 0.025296 |
| PON1      | 7q21.3    | -0.192454741 | 0.009851 | 0.025312 |
| SPTSSA    | 14q13.1   | -0.192429854 | 0.009861 | 0.025333 |
| MAP2K3    | 17p11.2   | 0.19240893   | 0.009869 | 0.025351 |
| ARF5      | 7q32.1    | 0.192356621  | 0.00989  | 0.0254   |
| JPH3      | 16q24.2   | -0.192352437 | 0.009891 | 0.025401 |
| HSPA12A   | 10q25.3   | -0.192341975 | 0.009895 | 0.025408 |
| LRRC75A   | 17p11.2   | -0.192264558 | 0.009926 | 0.025483 |
| AMDHD1    | 12q23.1   | -0.192255444 | 0.009929 | 0.025487 |
| FSTL4     | 5q31.1    | -0.192254196 | 0.00993  | 0.025487 |
| DNM3      | 1q24.3    | -0.192218526 | 0.009944 | 0.02552  |
| XYLT2     | 17q21.33  | 0.192193417  | 0.009954 | 0.025542 |
| OPN1MW    | Xq28      | -0.192158366 | 0.009968 | 0.025573 |
| VIPAS39   | 14q24.3   | 0.192155755  | 0.009969 | 0.025573 |
| CAPN13    | 2p23.1    | 0.192151972  | 0.00997  | 0.025574 |
| GDF5      | 20q11.22  | 0.192138113  | 0.009976 | 0.025585 |
| NAA16     | 13q14.11  | -0.192128554 | 0.009979 | 0.025591 |
| ANKRD45   | 1q25.1    | -0.192108636 | 0.009987 | 0.025608 |
| CDKAL1    | 6p22.3    | -0.192105538 | 0.009988 | 0.025608 |
| CCL2      | 17q12     | -0.192061599 | 0.010006 | 0.025649 |
| COPG1     | 3q21.3    | 0.192036491  | 0.010016 | 0.025671 |
| MCM2      | 3q21.3    | 0.191990459  | 0.010034 | 0.025715 |
| MAP3K15   | Xp22.12   | -0.191950123 | 0.01005  | 0.025752 |
| TMED7-TIC | 5q22.3    | -0.191916571 | 0.010063 | 0.025783 |
| ZNF638    | 2p13.3-p1 | -0.191890026 | 0.010074 | 0.025802 |
| CCL4      | 17q12     | -0.191887933 | 0.010075 | 0.025802 |
| TEC       | 4p12-p11  | 0.191887933  | 0.010075 | 0.025802 |
| XRRA1     | 11q13.4   | 0.191879564  | 0.010078 | 0.025808 |
| MYBBP1A   | 17p13.2   | -0.191875379 | 0.01008  | 0.025808 |
| UBAP1     | 9p13.3    | 0.191871195  | 0.010081 | 0.025809 |
| ALPK3     | 15q25.3   | -0.191864917 | 0.010084 | 0.025813 |
| CLEC4G    | 19p13.2   | -0.191833497 | 0.010096 | 0.025841 |
| HUS1B     | 6p25.3    | 0.191820728  | 0.010101 | 0.025851 |
| SLC7A1    | 13q12.3   | -0.191810516 | 0.010105 | 0.025858 |
| COMMD3    | 10p12.2   | 0.191781223  | 0.010117 | 0.025885 |
| PAXIP1    | 7q36.2    | -0.191774946 | 0.01012  | 0.025888 |
| TMEM155   | 4q27      | -0.191752714 | 0.010129 | 0.025907 |
| GABRR1    | 6q15      | -0.19173918  | 0.010134 | 0.025918 |
| CFAP70    | 10q22.2   | -0.19172473  | 0.01014  | 0.025929 |
| SOS1      | 2p22.1    | -0.191697529 | 0.010151 | 0.025953 |
| PTCHD4    | 6p12.3    | -0.191695437 | 0.010151 | 0.025953 |
| TNIK      | 3q26.2-q2 | 0.191605465  | 0.010188 | 0.026041 |
| AKR1E2    | 10p15.1   | 0.191601281  | 0.010189 | 0.026042 |
| C3ORF62   | 3p21.31   | -0.191586634 | 0.010195 | 0.026054 |
| MGAM      | 7q34      | -0.191553156 | 0.010209 | 0.026085 |
| SOX17     | 8q11.23   | -0.191534325 | 0.010216 | 0.026101 |
| RSAD2     | 2p25.2    | 0.191513402  | 0.010225 | 0.026118 |
| BOD1      | 5q35.2    | -0.191511309 | 0.010225 | 0.026118 |
| HTR1F     | 3p11.2-p1 | -0.191456919 | 0.010247 | 0.026168 |
| INHBA-AS1 | 17p14.1   | -0.191456819 | 0.010247 | 0.026168 |
| CACNG5    | 17q24.2   | -0.191453703 | 0.010249 | 0.026168 |

|           |            |               |           |           |
|-----------|------------|---------------|-----------|-----------|
| UTS2      | 1p36. 23   | 0. 191442748  | 0. 010253 | 0. 026176 |
| ARHGAP26  | 5q31. 3    | 0. 191438077  | 0. 010255 | 0. 026177 |
| ADGRA2    | 8p11. 23   | -0. 19142343  | 0. 010261 | 0. 026189 |
| LRRC58    | 3q13. 33   | -0. 191410876 | 0. 010266 | 0. 026198 |
| HSPB6     | 19q13. 12  | -0. 191358567 | 0. 010287 | 0. 026249 |
| STK11     | 19p13. 3   | 0. 191310443  | 0. 010307 | 0. 026294 |
| FBRS      | 16p11. 2   | 0. 191308351  | 0. 010308 | 0. 026294 |
| GMPR2     | 14q12      | 0. 191291612  | 0. 010314 | 0. 026308 |
| PLEKHA3   | 2q31. 2    | -0. 191276965 | 0. 01032  | 0. 02632  |
| MISP3     | 19p13. 12  | 0. 191272781  | 0. 010322 | 0. 026321 |
| PGPEP1    | 19p13. 11  | -0. 191258134 | 0. 010328 | 0. 026333 |
| OR10H5    | 19p13. 12  | 0. 191220152  | 0. 010343 | 0. 026369 |
| KIF17     | 1p36. 12   | -0. 191172347 | 0. 010363 | 0. 026415 |
| NBR2      | 17q21. 31  | 0. 191161886  | 0. 010367 | 0. 026423 |
| ERCC8     | 5q12. 1    | -0. 191136777 | 0. 010377 | 0. 026446 |
| QARS      | 3p21. 31   | 0. 191122131  | 0. 010383 | 0. 026457 |
| NDUFB10   | 16p13. 3   | 0. 191117946  | 0. 010385 | 0. 026457 |
| STMN3     | 20q13. 33  | -0. 191111669 | 0. 010388 | 0. 026457 |
| S100B     | 21q22. 3   | -0. 191111669 | 0. 010388 | 0. 026457 |
| LINC00643 | 14q23. 2   | -0. 191109333 | 0. 010389 | 0. 026457 |
| ZNF76     | 6p21. 31   | -0. 191088653 | 0. 010397 | 0. 026475 |
| SLC33A1   | 3q25. 31   | -0. 191080284 | 0. 0104   | 0. 026481 |
| ATP4A     | 19q13. 12  | -0. 191038414 | 0. 010418 | 0. 026521 |
| SUCLA2    | 13q14. 2   | -0. 19103216  | 0. 01042  | 0. 026524 |
| LIMK1     | 7q11. 23   | 0. 191025882  | 0. 010423 | 0. 026527 |
| PHKA2     | Xp22. 13   | -0. 190979851 | 0. 010442 | 0. 026572 |
| DEGS1     | 1q42. 11   | -0. 190961019 | 0. 010449 | 0. 026585 |
| SMIM1A    | 21q22. 11- | -0. 190958927 | 0. 01045  | 0. 026585 |
| HIST1H2BE | 6p22. 2    | 0. 190956835  | 0. 010451 | 0. 026585 |
| NEDD9     | 6p24. 2    | -0. 190954742 | 0. 010452 | 0. 026585 |
| VASH2     | 1q32. 3    | -0. 190948465 | 0. 010455 | 0. 026588 |
| RCAN3     | 1p36. 11   | -0. 190938003 | 0. 010459 | 0. 026595 |
| ZXDB      | Xp11. 21   | -0. 190914988 | 0. 010468 | 0. 026616 |
| TOR1AIP1  | 1q25. 2    | -0. 190902433 | 0. 010473 | 0. 026626 |
| SLC35G2   | 3q22. 3    | -0. 190896156 | 0. 010476 | 0. 026629 |
| MRPS18A   | 6p21. 1    | 0. 190848032  | 0. 010496 | 0. 026676 |
| SLC39A13  | 11p11. 2   | 0. 190835478  | 0. 010501 | 0. 026686 |
| SLC17A1   | 6p22. 2    | -0. 190792163 | 0. 010519 | 0. 026728 |
| DPH3      | 3p25. 1    | -0. 190770615 | 0. 010528 | 0. 026747 |
| ZNF221    | 19q13. 31  | -0. 190735045 | 0. 010543 | 0. 026781 |
| ZNF319    | 16q21      | -0. 190718306 | 0. 010549 | 0. 026795 |
| ZBTB11-AS | 3q12. 3    | 0. 190709937  | 0. 010553 | 0. 026801 |
| MAGEE2    | Xq13. 3    | -0. 190694184 | 0. 010559 | 0. 026814 |
| PHYKPL    | 5q35. 3    | 0. 190691105  | 0. 010561 | 0. 026814 |
| CCDC40    | 17q25. 3   | -0. 190645074 | 0. 01058  | 0. 026859 |
| LMF1      | 16p13. 3   | 0. 190611596  | 0. 010594 | 0. 026886 |
| TPRG1L    | 1p36. 32   | 0. 190611596  | 0. 010594 | 0. 026886 |
| PAX5      | 9p13. 2    | -0. 190609294 | 0. 010595 | 0. 026886 |
| ADH1C     | 4q23       | 0. 190599042  | 0. 010599 | 0. 026894 |
| POLR2E    | 19p13. 3   | 0. 190582303  | 0. 010606 | 0. 026908 |
| ADAMTS19  | 5q23. 3    | -0. 190535158 | 0. 010626 | 0. 026954 |
| CLC       | 19q13. 2   | -0. 190502962 | 0. 010639 | 0. 026985 |
| AP4M1     | 7q22. 1    | 0. 190479777  | 0. 010649 | 0. 027006 |
| ZNF467    | 7q36. 1    | -0. 190475593 | 0. 01065  | 0. 027007 |

|            |           |              |          |          |
|------------|-----------|--------------|----------|----------|
| MED7       | 5q33.3    | 0.190454669  | 0.010659 | 0.027026 |
| FAM78A     | 9q34.13   | -0.190423284 | 0.010672 | 0.027056 |
| KIF26A     | 14q32.33  | -0.190396083 | 0.010684 | 0.027081 |
| GABPB1-AS1 | 15q21.2   | -0.190377252 | 0.010692 | 0.027096 |
| CCDC177    | 14q24.1   | -0.190375608 | 0.010692 | 0.027096 |
| DPPA4      | 3q13.13   | -0.190345258 | 0.010705 | 0.027125 |
| NCLN       | 19p13.3   | 0.190335405  | 0.010709 | 0.027132 |
| TESK2      | 1p34.1    | -0.190278911 | 0.010733 | 0.027186 |
| HCG9       | 6p22.1    | -0.190278505 | 0.010733 | 0.027186 |
| PPP1R3E    | 14q11.2   | -0.190262172 | 0.01074  | 0.0272   |
| THYN1      | 11q25     | 0.190257988  | 0.010742 | 0.027201 |
| RALGAPB    | 20q11.23  | -0.190232879 | 0.010752 | 0.027224 |
| PIPSL      | 10q23.33  | 0.190170109  | 0.010779 | 0.027288 |
| AMFR       | 16q13     | 0.190159647  | 0.010783 | 0.027295 |
| NPAT       | 11q22.3   | -0.190140816 | 0.010791 | 0.027312 |
| ALDH3B2    | 11q13.2   | 0.190116105  | 0.010802 | 0.027335 |
| PRAMEF12   | 1p36.21   | -0.190097066 | 0.01081  | 0.027352 |
| TVP23A     | 16p13.13  | -0.19008223  | 0.010816 | 0.027364 |
| LINC00696  | 3p21.2    | 0.189975398  | 0.010861 | 0.027476 |
| CHD9       | 16q12.2   | -0.189958781 | 0.010868 | 0.02749  |
| PSME3      | 17q21.31  | 0.189937857  | 0.010877 | 0.027509 |
| KCNJ10     | 1q23.2    | -0.189912749 | 0.010888 | 0.027533 |
| SMARCE1    | 17q21.2   | -0.189906472 | 0.010891 | 0.027536 |
| VWA5B2     | 3q27.1    | -0.18989601  | 0.010895 | 0.027544 |
| TRNAU1AP   | 1p35.3    | 0.189879271  | 0.010902 | 0.027558 |
| GOLGA8EP   | 15q11.2   | -0.189874223 | 0.010904 | 0.02756  |
| ZNF93      | 19p12     | -0.189820685 | 0.010927 | 0.027612 |
| R3HDML     | 20q13.12  | 0.189820055  | 0.010927 | 0.027612 |
| ZNF383     | 19q13.12  | -0.189804045 | 0.010934 | 0.027625 |
| EIF4E      | 4q23      | -0.189797669 | 0.010937 | 0.027629 |
| TRIB2      | 2p24.3    | 0.189728621  | 0.010967 | 0.0277   |
| MYPOP      | 19q13.32  | 0.189720252  | 0.01097  | 0.027706 |
| AKIP1      | 11p15.4   | 0.189695144  | 0.010981 | 0.027729 |
| FIGNL2     | 12q13.13  | -0.189663758 | 0.010994 | 0.02776  |
| LINC00314  | 21q21.3   | -0.18962403  | 0.011012 | 0.027799 |
| CSF1       | 1p13.3    | -0.18960308  | 0.011021 | 0.027815 |
| SELENOI    | 2p23.3    | -0.18960308  | 0.011021 | 0.027815 |
| SRD5A1     | 5p15.31   | 0.189577972  | 0.011031 | 0.027836 |
| C19ORF24   | 19p13.3   | 0.189573787  | 0.011033 | 0.027836 |
| MGAT5B     | 17q25.2   | -0.189573787 | 0.011033 | 0.027836 |
| KRTAP5-5   | 11p15.5   | -0.189525027 | 0.011054 | 0.027886 |
| ACTC1      | 15q14     | -0.189482869 | 0.011072 | 0.027928 |
| RIPPLY3    | 21q22.13  | 0.189475446  | 0.011076 | 0.027933 |
| MAN2C1     | 15q24.2   | 0.189464984  | 0.01108  | 0.027941 |
| SLU7       | 5q33.3    | -0.189450338 | 0.011087 | 0.027953 |
| GLE1       | 9q34.11   | -0.189446153 | 0.011088 | 0.027954 |
| SORT1      | 1p13.3 1p | -0.189441968 | 0.01109  | 0.027955 |
| UMPS       | 3q21.2    | 0.189406398  | 0.011106 | 0.027991 |
| TADA2A     | 17q12     | -0.189393844 | 0.011111 | 0.028001 |
| RNF216P1   | 7p22.1    | -0.189387567 | 0.011114 | 0.028004 |
| MYOG       | 1q32.1    | 0.189335234  | 0.011136 | 0.028058 |
| CD96       | 3q13.13-c | -0.189322704 | 0.011142 | 0.028068 |
| LINC02591  | 11q21.1   | 0.189316427  | 0.011145 | 0.028071 |
| CAMSAP3    | 19p13.2   | 0.189276672  | 0.011162 | 0.028112 |

|            |          |              |          |          |
|------------|----------|--------------|----------|----------|
| UTP6       | 17q11.2  | 0.189257841  | 0.01117  | 0.028129 |
| NEDD8      | 14q12    | 0.189243195  | 0.011176 | 0.028141 |
| TMEM167A   | 5q14.2   | -0.189201347 | 0.011195 | 0.028182 |
| COG5       | 7q22.3   | -0.189199255 | 0.011196 | 0.028182 |
| FIGNL1     | 7p12.2   | -0.189172054 | 0.011208 | 0.028209 |
| PTGES2-AS1 | 9q34.11  | 0.189134392  | 0.011224 | 0.028247 |
| OSCP1      | 1p34.3   | -0.189100914 | 0.011239 | 0.028276 |
| PCBD2      | 5q31.1   | 0.189100914  | 0.011239 | 0.028276 |
| TANG06     | 16q22.1  | -0.189067437 | 0.011253 | 0.02831  |
| MED4       | 13q14.2  | 0.189059067  | 0.011257 | 0.028315 |
| USP7       | 16p13.2  | -0.188967004 | 0.011297 | 0.028414 |
| GNPAT      | 1q42.2   | 0.188958634  | 0.011301 | 0.028419 |
| EPHA4      | 2q36.1   | 0.188927249  | 0.011315 | 0.02845  |
| PRPS1L1    | 7p21.1   | -0.188919217 | 0.011319 | 0.028456 |
| RPLP2      | 11p15.5  | 0.18890214   | 0.011326 | 0.028471 |
| HSPA1B     | 6p21.33  | 0.188883309  | 0.011334 | 0.028488 |
| CDC37L1    | 9p24.1   | -0.188864478 | 0.011343 | 0.028506 |
| CYP4F2     | 19p13.12 | 0.18885151   | 0.011348 | 0.028515 |
| ADPRM      | 17p13.1  | -0.188849832 | 0.011349 | 0.028515 |
| ZNF786     | 7q36.1   | -0.188833093 | 0.011357 | 0.02853  |
| SLC4A10    | 2q24.2   | -0.18872887  | 0.011403 | 0.028642 |
| TBX22      | Xq21.1   | -0.188686391 | 0.011422 | 0.028686 |
| FETUB      | 3q27.3   | 0.188604156  | 0.011458 | 0.028774 |
| BAX        | 19q13.33 | 0.188592472  | 0.011463 | 0.028784 |
| CD3G       | 11q23.3  | -0.188574035 | 0.011472 | 0.028801 |
| ITGB7      | 12q13.13 | 0.188508777  | 0.011501 | 0.02887  |
| TXNIP      | 1q21.1   | 0.188496223  | 0.011506 | 0.028881 |
| DDX24      | 14q32.12 | -0.188487854 | 0.01151  | 0.028885 |
| PPM1F      | 22q11.22 | -0.188485762 | 0.011511 | 0.028885 |
| ZNF192P1   | 6p22.1   | 0.188474352  | 0.011516 | 0.028894 |
| HPR        | 16q22.2  | -0.188470258 | 0.011518 | 0.028895 |
| SEPTIN10   | 2q13     | 0.188458561  | 0.011523 | 0.028905 |
| PLOD3      | 7q22.1   | 0.188414621  | 0.011543 | 0.028951 |
| BUD31      | 7q22.1   | 0.188387421  | 0.011555 | 0.028978 |
| RPL5       | 1p22.1   | -0.188343481 | 0.011575 | 0.029023 |
| HBG1       | 11p15.4  | -0.188331218 | 0.01158  | 0.029034 |
| FABP5P3    | 7q36.1   | -0.188327377 | 0.011582 | 0.029034 |
| TMEM251    | 14q32.12 | -0.188312096 | 0.011589 | 0.029048 |
| DHX34      | 19q13.32 | 0.188286988  | 0.0116   | 0.029073 |
| THNSL2     | 2p11.2   | 0.188272341  | 0.011607 | 0.029086 |
| ERCC6L     | Xq13.1   | 0.188226309  | 0.011628 | 0.029134 |
| KRTAP5-7   | 11q13.4  | 0.188220586  | 0.01163  | 0.029137 |
| IRS2       | 13q34    | -0.188167723 | 0.011654 | 0.029193 |
| EYA2       | 20q13.12 | 0.188153077  | 0.011661 | 0.029206 |
| NLRP2      | 19q13.42 | 0.188145852  | 0.011664 | 0.02921  |
| SDE2       | 1q42.12  | -0.188136338 | 0.011668 | 0.029217 |
| PRMT1      | 19q13.33 | 0.188123784  | 0.011674 | 0.029228 |
| LOC341056  | 11q24.1  | 0.188100768  | 0.011684 | 0.029251 |
| CIDEA      | 18p11.21 | -0.188085743 | 0.011691 | 0.029262 |
| UQCRQ      | 5q31.1   | 0.188084029  | 0.011692 | 0.029262 |
| C18ORF21   | 18q12.2  | -0.188010797 | 0.011725 | 0.029342 |
| ARMT1      | 6q25.1   | -0.188006612 | 0.011727 | 0.029343 |
| IGFBP1     | 7p12.3   | 0.18796058   | 0.011748 | 0.029392 |
| WDTC1      | 1p36.11  | -0.187939656 | 0.011758 | 0.029412 |

|           |          |              |          |          |
|-----------|----------|--------------|----------|----------|
| SHCBP1    | 16q11.2  | 0.187920825  | 0.011766 | 0.02943  |
| CBLN4     | 20q13.2  | -0.187914941 | 0.011769 | 0.029433 |
| TCL6      | 14q32.13 | -0.187898263 | 0.011777 | 0.029445 |
| SPCS3     | 4q34.2   | -0.187897809 | 0.011777 | 0.029445 |
| DDX56     | 7p13     | 0.187878978  | 0.011785 | 0.029463 |
| TCEAL4    | Xq22.2   | -0.187866424 | 0.011791 | 0.029473 |
| EZH2      | 7q36.1   | 0.187862239  | 0.011793 | 0.029474 |
| USE1      | 19p13.11 | 0.187847593  | 0.0118   | 0.029487 |
| GCN1      | 12q24.23 | -0.187832946 | 0.011806 | 0.0295   |
| TEX43     | 5q23.2   | -0.18781691  | 0.011814 | 0.029515 |
| SLC6A17   | 1p13.3   | -0.187776453 | 0.011832 | 0.029558 |
| SNHG11    | 20q11.23 | 0.187765991  | 0.011837 | 0.029566 |
| PRRT4     | 7q32.1   | -0.187702449 | 0.011866 | 0.029635 |
| ZNF395    | 8p21.1   | -0.187692758 | 0.011871 | 0.029643 |
| FCGRT     | 19q13.33 | 0.187686481  | 0.011874 | 0.029646 |
| ZNF585B   | 19q13.12 | -0.187673927 | 0.011879 | 0.029657 |
| CELF3     | 1q21.3   | -0.187665558 | 0.011883 | 0.029663 |
| ZNF780A   | 19q13.2  | -0.187648819 | 0.011891 | 0.029674 |
| SERAC1    | 6q25.3   | -0.187648819 | 0.011891 | 0.029674 |
| CHCHD2    | 7p11.2   | 0.187636265  | 0.011897 | 0.029684 |
| HIGD1A    | 3p22.1   | 0.187634172  | 0.011898 | 0.029684 |
| TMPRSS11L | 4q13.2   | 0.187613828  | 0.011907 | 0.029704 |
| MAP2K5    | 15q23    | -0.187609064 | 0.011909 | 0.029705 |
| PIWIL4    | 11q21    | 0.187581863  | 0.011922 | 0.029733 |
| EPYC      | 12q21.33 | 0.187559349  | 0.011932 | 0.029755 |
| RAB34     | 17q11.2  | 0.187554663  | 0.011934 | 0.029757 |
| RBMS3     | 3p24.1   | -0.187546293 | 0.011938 | 0.029763 |
| SSNA1     | 9q34.3   | 0.187540016  | 0.011941 | 0.029766 |
| ECHS1     | 10q26.3  | 0.187531647  | 0.011945 | 0.029772 |
| CALR      | 19p13.13 | 0.187521185  | 0.01195  | 0.029779 |
| EIF2S2    | 20q11.22 | 0.187519093  | 0.011951 | 0.029779 |
| RPA3      | 7p21.3   | 0.187512816  | 0.011954 | 0.029783 |
| RTN3      | 11q13.1  | 0.187502354  | 0.011958 | 0.029791 |
| DIMT1     | 5q12.1   | -0.187491892 | 0.011963 | 0.029799 |
| VCL       | 10q22.2  | 0.187487707  | 0.011965 | 0.029801 |
| BBS7      | 4q27     | -0.187464691 | 0.011976 | 0.029823 |
| EIF4G2    | 11p15.4  | -0.187443768 | 0.011986 | 0.029844 |
| TMEM214   | 2p23.3   | 0.187406105  | 0.012003 | 0.029884 |
| SNURF     | 15q11.2  | -0.187377957 | 0.012016 | 0.029912 |
| ATXN7L3B  | 12q21.1  | -0.187307765 | 0.012049 | 0.02999  |
| MCTP2     | 15q26.2  | -0.187293118 | 0.012056 | 0.030003 |
| FXYP4     | 10q11.21 | 0.18725833   | 0.012072 | 0.03004  |
| SPTBN4    | 19q13.2  | -0.187253363 | 0.012074 | 0.030042 |
| PSMD1     | 2q37.1   | 0.187230348  | 0.012085 | 0.030065 |
| IMMP1L    | 11p13    | -0.187205239 | 0.012097 | 0.03009  |
| PA2G4     | 12q13.2  | 0.187171762  | 0.012112 | 0.030125 |
| PTBP2     | 1p21.3   | -0.187165484 | 0.012115 | 0.030129 |
| PLXND1    | 3q22.1   | -0.187115268 | 0.012139 | 0.030184 |
| MEF2A     | 15q26.3  | -0.187088067 | 0.012151 | 0.030212 |
| FBXL14    | 12p13.33 | -0.187067144 | 0.012161 | 0.030232 |
| TMPRSS2   | 21q22.3  | 0.187062959  | 0.012163 | 0.030233 |
| EBAG9     | 8q23.2   | -0.187039943 | 0.012174 | 0.030257 |
| HAO1      | 20p12.3  | -0.187035585 | 0.012176 | 0.030258 |
| TGM3      | 20p13    | -0.187011307 | 0.012188 | 0.030283 |

|           |           |              |          |          |
|-----------|-----------|--------------|----------|----------|
| TDRD10    | 1q21.3    | -0.187002281 | 0.012192 | 0.030287 |
| BRS3      | Xq26.3    | -0.186998811 | 0.012193 | 0.030287 |
| GYPC      | 2q14.3    | -0.186998096 | 0.012194 | 0.030287 |
| PRKG1     | 10q11.23- | -0.186966711 | 0.012209 | 0.03032  |
| SPOCK3    | 4q32.3    | -0.186893419 | 0.012243 | 0.030402 |
| NTN1      | 17p13.1   | -0.186874647 | 0.012252 | 0.03042  |
| SPSB2     | 12p13.31  | 0.186857908  | 0.01226  | 0.030436 |
| ZNF557    | 19p13.2   | -0.18682443  | 0.012276 | 0.03047  |
| NELFE     | 6p21.33   | 0.186822338  | 0.012277 | 0.03047  |
| MFHAS1    | 8p23.1    | -0.18679723  | 0.012289 | 0.030494 |
| LYPD5     | 19q13.31  | 0.186795137  | 0.01229  | 0.030494 |
| IGF2BP2-A | 3q27.2    | 0.186788708  | 0.012293 | 0.030498 |
| PVALEF    | 17q25.3   | -0.186770993 | 0.012301 | 0.030515 |
| GJC1      | 17q21.31  | -0.186755383 | 0.012308 | 0.03053  |
| CXXC1     | 18q21.1   | -0.186751198 | 0.01231  | 0.030531 |
| UBE2W     | 8q21.11   | -0.186698889 | 0.012335 | 0.030589 |
| TEKT4P2   | 21p11.2   | 0.186677965  | 0.012345 | 0.030607 |
| CCR5      | 3p21.31   | -0.186675873 | 0.012346 | 0.030607 |
| HNRNPF    | 10q11.21  | 0.186673781  | 0.012347 | 0.030607 |
| OSR1      | 2p24.1    | -0.18664658  | 0.01236  | 0.030635 |
| TANC2     | 17q23.2-c | -0.186594271 | 0.012385 | 0.030693 |
| STK17B    | 2q32.3    | -0.186579625 | 0.012392 | 0.030706 |
| ABCA11P   | 4p16.3    | -0.186577532 | 0.012393 | 0.030706 |
| ZNF649    | 19q13.41  | -0.186573348 | 0.012395 | 0.030707 |
| TTK       | 6q14.1    | 0.186556609  | 0.012403 | 0.030723 |
| SRCIN1    | 17q12     | -0.1865315   | 0.012415 | 0.030747 |
| ZNF433    | 19p13.2   | -0.186529408 | 0.012416 | 0.030747 |
| KRTAP7-1  | 21q22.11  | -0.186504287 | 0.012428 | 0.030773 |
| ECE2      | 3q27.1    | -0.186498023 | 0.012431 | 0.030777 |
| NSG2      | 5q35.2    | -0.186494326 | 0.012433 | 0.030777 |
| KIF11     | 10q23.33  | 0.186481284  | 0.012439 | 0.030789 |
| FFAR3     | 19q13.12  | -0.18646912  | 0.012445 | 0.0308   |
| CCDC85B   | 11q13.1   | 0.186451991  | 0.012453 | 0.030815 |
| NRG1      | 8p12      | -0.186449899 | 0.012454 | 0.030815 |
| DDX11     | 12p11.21  | 0.186437344  | 0.01246  | 0.030826 |
| OLFM2     | 19p13.2   | -0.186405959 | 0.012475 | 0.030859 |
| PITPNC1   | 17q24.2   | -0.186382943 | 0.012486 | 0.030883 |
| STARD10   | 11q13.4   | 0.18636202   | 0.012496 | 0.030904 |
| STIL      | 1p33      | 0.186336911  | 0.012508 | 0.03093  |
| DST       | 6p12.1    | -0.186320172 | 0.012517 | 0.030946 |
| TRAF3     | 14q32.32  | -0.186288787 | 0.012532 | 0.03098  |
| KDSR      | 18q21.33  | -0.186269956 | 0.012541 | 0.030998 |
| RGS19     | 20q13.33  | 0.186249032  | 0.012551 | 0.031019 |
| ZNF230    | 19q13.31  | -0.186243899 | 0.012553 | 0.031019 |
| ISY1      | 3q21.3    | 0.186242755  | 0.012554 | 0.031019 |
| REEP3     | 10q21.3   | 0.186234386  | 0.012558 | 0.031025 |
| ABCB5     | 7p21.1    | -0.186218155 | 0.012566 | 0.03104  |
| GART      | 21q22.11  | 0.186215555  | 0.012567 | 0.03104  |
| BTBD2     | 19p13.3   | 0.186196723  | 0.012576 | 0.031059 |
| C17ORF97  | 17p13.3   | -0.186188354 | 0.01258  | 0.031065 |
| CLEC4C    | 12p13.31  | -0.186174067 | 0.012587 | 0.031078 |
| PIN1      | 19p13.2   | 0.186142322  | 0.012602 | 0.031112 |
| ITK       | 5q33.3    | -0.18613186  | 0.012608 | 0.031121 |
| OR2W3     | 1q44      | -0.186109065 | 0.012619 | 0.031144 |

|           |           |              |          |          |
|-----------|-----------|--------------|----------|----------|
| PFDN4     | 20q13.2   | 0.186008411  | 0.012667 | 0.031257 |
| RPL13AP1  | 17q21.11  | 0.186007205  | 0.012668 | 0.031257 |
| CDH10     | 5p14.2-p1 | -0.186005706 | 0.012669 | 0.031257 |
| ABI3BP    | 3q12.2    | -0.185997949 | 0.012673 | 0.031262 |
| ARNT      | 1q21.3    | -0.185895424 | 0.012723 | 0.031379 |
| TAAR1     | 6q23.2    | -0.185894497 | 0.012723 | 0.031379 |
| PEBP1     | 12q24.23  | -0.185887055 | 0.012727 | 0.031384 |
| NOD2      | 16q12.1   | 0.185822192  | 0.012758 | 0.031458 |
| MTMR10    | 15q13.3   | -0.185794991 | 0.012772 | 0.031487 |
| AP2A2     | 11p15.5   | -0.185790806 | 0.012774 | 0.031489 |
| PRPF3     | 1q21.2    | 0.185782437  | 0.012778 | 0.031495 |
| DUSP26    | 8p12      | -0.185778252 | 0.01278  | 0.031496 |
| ETV5      | 3q27.2    | -0.185771975 | 0.012783 | 0.0315   |
| RPL26     | 17p13.1   | -0.185757328 | 0.01279  | 0.031513 |
| PCDHA13   | 5q31.3    | -0.185736677 | 0.0128   | 0.031535 |
| TYMS      | 18p11.32  | 0.18573222   | 0.012803 | 0.031536 |
| NUP43     | 6q25.1    | -0.185728035 | 0.012805 | 0.031537 |
| CENPW     | 6q22.32   | 0.18569665   | 0.01282  | 0.031567 |
| PPP1R16A  | 8q24.3    | 0.18569665   | 0.01282  | 0.031567 |
| LRRC40    | 1p31.1    | -0.185654803 | 0.012841 | 0.031614 |
| CPED1     | 7q31.31   | -0.185648526 | 0.012844 | 0.031618 |
| PDE11A    | 2q31.2    | 0.18558994   | 0.012873 | 0.031684 |
| TMEM63C   | 14q24.3   | -0.185587848 | 0.012874 | 0.031684 |
| HPCA      | 1p35.1    | -0.185575391 | 0.01288  | 0.031695 |
| WBP11P1   | 18q12.1   | -0.185516707 | 0.012909 | 0.031763 |
| JAM3      | 11q25     | -0.185502061 | 0.012916 | 0.031776 |
| LINC00889 | Xq26.3    | -0.18549305  | 0.01292  | 0.031784 |
| KCTD7     | 7q11.21   | -0.185485322 | 0.012924 | 0.031789 |
| FZD9      | 7q11.23   | -0.185461575 | 0.012936 | 0.031814 |
| PRRT1     | 6p21.32   | -0.18544766  | 0.012943 | 0.031826 |
| ZNF142    | 2q35      | -0.185445567 | 0.012944 | 0.031826 |
| SNORD15A  | 11q13.4   | 0.185410117  | 0.012962 | 0.031865 |
| SMAD7     | 18q21.1   | -0.185391166 | 0.012971 | 0.031884 |
| CSTF2     | Xq22.1    | 0.18537652   | 0.012978 | 0.031898 |
| ZNF101    | 19p13.11  | -0.185349319 | 0.012992 | 0.031928 |
| DYNLRB2   | 16q23.2   | -0.18534568  | 0.012994 | 0.031928 |
| GRAMD2A   | 15q23     | 0.185336765  | 0.012998 | 0.031933 |
| UNC5C     | 4q22.3    | -0.18533506  | 0.012999 | 0.031933 |
| C9ORF139  | 9q34.3    | -0.185294841 | 0.013019 | 0.031979 |
| APBB2     | 4p14-p13  | -0.185271902 | 0.01303  | 0.032003 |
| FBLIM1    | 1p36.21   | 0.185223778  | 0.013054 | 0.032058 |
| TBCC      | 6p21.1    | -0.185219593 | 0.013056 | 0.032058 |
| IL18R1    | 2q12.1    | -0.1852175   | 0.013058 | 0.032058 |
| RTP5      | 2q37.3    | -0.185201751 | 0.013065 | 0.032073 |
| PTOV1     | 19q13.33  | 0.185177746  | 0.013077 | 0.032099 |
| CYP1B1    | 2p22.2    | -0.185112883 | 0.01311  | 0.032174 |
| NCBP2AS2  | 3q29      | 0.185045927  | 0.013144 | 0.032253 |
| CPA6      | 8q13.2    | 0.185024317  | 0.013154 | 0.032276 |
| MRC1      | 10p12.33  | -0.185010357 | 0.013161 | 0.032289 |
| PLXDC2    | 10p12.31  | -0.184972695 | 0.01318  | 0.032331 |
| IL22RA1   | 1p36.11   | 0.184909924  | 0.013212 | 0.032405 |
| GET4      | 7p22.3    | 0.184880631  | 0.013227 | 0.032437 |
| CHTOP     | 1q21.3    | 0.184874354  | 0.01323  | 0.032441 |
| SNRPA1    | 15q26.3   | 0.184855523  | 0.01324  | 0.032461 |

|          |           |               |           |           |
|----------|-----------|---------------|-----------|-----------|
| ZMAT2    | 5q31. 3   | 0. 184847153  | 0. 013244 | 0. 032467 |
| ZFHX4    | 8q21. 13  | -0. 184824137 | 0. 013255 | 0. 032492 |
| ASNS     | 7q21. 3   | -0. 184815768 | 0. 01326  | 0. 032498 |
| RGS5     | 1q23. 3   | -0. 184767644 | 0. 013284 | 0. 032551 |
| ACOXL    | 2q13      | -0. 184764687 | 0. 013286 | 0. 032551 |
| TP73-AS1 | 1p36. 32  | -0. 184763459 | 0. 013286 | 0. 032551 |
| ATAT1    | 6p21. 33  | 0. 184660934  | 0. 013338 | 0. 032675 |
| ST6GAL1  | 3q27. 3   | -0. 184654657 | 0. 013342 | 0. 032675 |
| TMEM190  | 19q13. 42 | 0. 18465423   | 0. 013342 | 0. 032675 |
| GATA6    | 18q11. 2  | 0. 184606532  | 0. 013366 | 0. 032731 |
| SEC14L4  | 22q12. 2  | 0. 184597036  | 0. 013371 | 0. 032738 |
| CCZ1B    | 7p22. 1   | 0. 184585609  | 0. 013377 | 0. 032749 |
| OR10H2   | 19p13. 12 | 0. 184573375  | 0. 013383 | 0. 032756 |
| PRKACA   | 19p13. 12 | -0. 184573055 | 0. 013383 | 0. 032756 |
| GABRG1   | 4p12      | -0. 184559179 | 0. 01339  | 0. 03277  |
| EXTL2    | 1p21. 2   | -0. 184539577 | 0. 0134   | 0. 032789 |
| CLK2P1   | 7p15. 3   | 0. 184537485  | 0. 013401 | 0. 032789 |
| COQ10B   | 2q33. 1   | 0. 184493545  | 0. 013424 | 0. 03284  |
| EIF3CL   | 16p12. 1  | 0. 184485176  | 0. 013428 | 0. 032841 |
| MKI67    | 10q26. 2  | 0. 184485176  | 0. 013428 | 0. 032841 |
| SOWAHC   | 2q13      | 0. 184483083  | 0. 013429 | 0. 032841 |
| PPTC7    | 12q24. 11 | -0. 184478899 | 0. 013431 | 0. 032842 |
| WIPF2    | 17q21. 2  | 0. 18446216   | 0. 01344  | 0. 032856 |
| ZNF804B  | 7q21. 13  | -0. 184461752 | 0. 01344  | 0. 032856 |
| ZIM2     | 19q13. 43 | -0. 184457819 | 0. 013442 | 0. 032856 |
| PDP2     | 16q22. 1  | -0. 184422405 | 0. 01346  | 0. 032897 |
| DHH      | 12q13. 12 | -0. 184414036 | 0. 013465 | 0. 032903 |
| TANG02   | 22q11. 21 | -0. 184405666 | 0. 013469 | 0. 032908 |
| THOC2    | Xq25      | -0. 184403574 | 0. 01347  | 0. 032908 |
| RAB7A    | 3q21. 3   | 0. 184386835  | 0. 013479 | 0. 032925 |
| APOBEC4  | 1q25. 3   | -0. 184352649 | 0. 013496 | 0. 032964 |
| GNB1L    | 22q11. 21 | 0. 184340803  | 0. 013502 | 0. 03297  |
| GPR63    | 6q16. 1   | -0. 184340803 | 0. 013502 | 0. 03297  |
| PSMA6    | 14q13. 2  | 0. 184338711  | 0. 013503 | 0. 03297  |
| ZNF200   | 16p13. 3  | -0. 184332434 | 0. 013507 | 0. 032974 |
| ALKBH2   | 12q24. 11 | 0. 184317787  | 0. 013514 | 0. 032988 |
| UNC5B    | 10q22. 1  | 0. 184286402  | 0. 01353  | 0. 033023 |
| FAM86DP  | 3p12. 3   | 0. 184269663  | 0. 013539 | 0. 033034 |
| CHD4     | 12p13. 31 | -0. 184269663 | 0. 013539 | 0. 033034 |
| PDCL2    | 4q12      | 0. 184267925  | 0. 01354  | 0. 033034 |
| FITM1    | 14q12     | -0. 184265575 | 0. 013541 | 0. 033034 |
| RAPGEF3  | 12q13. 11 | 0. 184223631  | 0. 013563 | 0. 033082 |
| PPAT     | 4q12      | -0. 184190153 | 0. 01358  | 0. 03312  |
| ITGAD    | 16p11. 2  | -0. 184177964 | 0. 013586 | 0. 033128 |
| HS1BP3   | 2p24. 1   | 0. 184177599  | 0. 013586 | 0. 033128 |
| ZNF8     | 19q13. 43 | -0. 184167137 | 0. 013592 | 0. 033137 |
| COL11A1  | 1p21. 1   | 0. 184161246  | 0. 013595 | 0. 033141 |
| EGFL7    | 9q34. 3   | -0. 184142029 | 0. 013605 | 0. 033161 |
| ATP13A3  | 3q29      | -0. 184114829 | 0. 013619 | 0. 033191 |
| RNPS1    | 16p13. 3  | 0. 184108551  | 0. 013622 | 0. 033195 |
| OLFML3   | 1p13. 2   | -0. 184064612 | 0. 013645 | 0. 033247 |
| ZNHIT3   | 17q12     | 0. 184047873  | 0. 013654 | 0. 033264 |
| HIST3H3  | 1q42. 13  | 0. 184010723  | 0. 013673 | 0. 033303 |
| AP1M1    | 19p13. 11 | 0. 184010211  | 0. 013673 | 0. 033303 |



|           |          |              |          |          |
|-----------|----------|--------------|----------|----------|
| DOCK2     | 5q35.1   | -0.183995564 | 0.013681 | 0.033318 |
| HTRA3     | 4p16.1   | 0.183985102  | 0.013686 | 0.033327 |
| RGS14     | 5q35.3   | 0.183957902  | 0.013701 | 0.033358 |
| RNF217    | 6q22.31  | -0.18394744  | 0.013706 | 0.033367 |
| C10RF229  | 1q44     | -0.183937074 | 0.013711 | 0.033376 |
| LINC00691 | 13p24.2  | 0.183895912  | 0.013733 | 0.033424 |
| MMP21     | 10q26.2  | -0.183856151 | 0.013754 | 0.033471 |
| PSMA8     | 18q11.2  | -0.183832271 | 0.013766 | 0.033497 |
| VTN       | 17q11.2  | -0.183826083 | 0.013769 | 0.033501 |
| CDKN2AIPN | 5q31.1   | -0.183817714 | 0.013774 | 0.033507 |
| GRIK1     | 21q21.3  | -0.183776687 | 0.013795 | 0.033556 |
| TBC1D22B  | 6p21.2   | -0.183750758 | 0.013809 | 0.033585 |
| ZFYVE1    | 14q24.2  | -0.18372565  | 0.013822 | 0.033613 |
| PIRT      | 17p12    | -0.183719397 | 0.013825 | 0.033617 |
| ZNF705A   | 12p13.31 | -0.183714828 | 0.013828 | 0.033618 |
| ACSM6     | 10q23.33 | -0.183681043 | 0.013846 | 0.033657 |
| PLIN1     | 15q26.1  | -0.183641956 | 0.013866 | 0.033703 |
| ASCC2     | 22q12.2  | 0.183629402  | 0.013873 | 0.033711 |
| CCDC134   | 22q13.2  | -0.183629402 | 0.013873 | 0.033711 |
| KNTC1     | 12q24.31 | 0.18361894   | 0.013878 | 0.03372  |
| TOM1      | 22q12.3  | 0.183606386  | 0.013885 | 0.033732 |
| GXYLT2    | 3p13     | -0.183579185 | 0.013899 | 0.033763 |
| DHDH      | 19q13.33 | 0.183535246  | 0.013922 | 0.033814 |
| GLIPR1    | 12q21.2  | -0.183533153 | 0.013924 | 0.033814 |
| HENMT1    | 1p13.3   | 0.183520599  | 0.01393  | 0.033826 |
| HAPLN1    | 5q14.3   | 0.183460305  | 0.013962 | 0.033899 |
| KCTD2     | 17q25.1  | -0.183434813 | 0.013976 | 0.033928 |
| SAC3D1    | 11q13.1  | 0.183428536  | 0.013979 | 0.033932 |
| CRISPLD2  | 16q24.1  | -0.183378319 | 0.014006 | 0.033993 |
| ATXN1     | 6p22.3   | -0.183363673 | 0.014013 | 0.034003 |
| FKBPL     | 6p21.32  | 0.183363673  | 0.014013 | 0.034003 |
| SPG21     | 15q22.31 | 0.183349026  | 0.014021 | 0.034018 |
| TDGF1P3   | Xq23     | -0.183342621 | 0.014025 | 0.034022 |
| IDH1      | 2q34     | 0.18333438   | 0.014029 | 0.034029 |
| SPON2     | 4p16.3   | 0.183300902  | 0.014047 | 0.034066 |
| RABL3     | 3q13.33  | -0.183298809 | 0.014048 | 0.034066 |
| RNF113B   | 13q32.2  | 0.183292756  | 0.014051 | 0.034066 |
| MIR7-3HG  | 19p13.3  | -0.183292755 | 0.014051 | 0.034066 |
| TTC27     | 2p22.3   | 0.183284163  | 0.014056 | 0.034073 |
| ESPL1     | 12q13.13 | 0.183263239  | 0.014067 | 0.034096 |
| ZSCAN29   | 15q15.3  | -0.183227669 | 0.014086 | 0.034138 |
| IGF1R     | 15q26.3  | -0.183206746 | 0.014097 | 0.034161 |
| KRT32     | 17q21.2  | 0.183192261  | 0.014105 | 0.034175 |
| BIN1      | 2q14.3   | 0.183177549  | 0.014113 | 0.03419  |
| CPNE1     | 20q11.22 | 0.18313979   | 0.014133 | 0.034235 |
| ACKR1     | 1q23.2   | -0.183129329 | 0.014138 | 0.034245 |
| PSG2      | 19q13.31 | -0.18312371  | 0.014141 | 0.034248 |
| GSN       | 9q33.2   | 0.183079112  | 0.014165 | 0.034301 |
| ST5       | 11p15.4  | 0.183058188  | 0.014177 | 0.03432  |
| GNB5      | 15q21.2  | -0.183058188 | 0.014177 | 0.03432  |
| PPARA     | 22q13.31 | -0.183030988 | 0.014191 | 0.034352 |
| TP53INP2  | 20q11.22 | -0.183024711 | 0.014195 | 0.034356 |
| NOL12     | 22q13.1  | 0.182989141  | 0.014214 | 0.034398 |
| CCR4      | 3p22.3   | -0.182984039 | 0.014217 | 0.0344   |

|           |           |               |           |           |
|-----------|-----------|---------------|-----------|-----------|
| SLC9A3R1  | 17q25. 1  | 0. 182978679  | 0. 014219 | 0. 034403 |
| PSMB2     | 1p34. 3   | 0. 18296194   | 0. 014228 | 0. 034421 |
| LYSMD2    | 15q21. 2  | -0. 182953571 | 0. 014233 | 0. 034427 |
| TTLL4     | 2q35      | 0. 182930555  | 0. 014245 | 0. 034453 |
| CS        | 12q13. 3  | -0. 182913816 | 0. 014254 | 0. 034471 |
| SMPD4     | 2q21. 1   | 0. 182905446  | 0. 014259 | 0. 034478 |
| GNAQ      | 9q21. 2   | -0. 182892892 | 0. 014266 | 0. 03449  |
| COA6      | 1q42. 2   | 0. 182876153  | 0. 014275 | 0. 034508 |
| FEN1      | 11q12. 2  | 0. 182869876  | 0. 014278 | 0. 034512 |
| WAPL      | 10q23. 2  | -0. 182859415 | 0. 014284 | 0. 034521 |
| CRYGC     | 2q33. 3   | -0. 182805453 | 0. 014313 | 0. 034588 |
| WNT9B     | 17q21. 32 | -0. 182798146 | 0. 014317 | 0. 034593 |
| RPRD1B    | 20q11. 23 | -0. 182790367 | 0. 014321 | 0. 034599 |
| KLF14     | 7q32. 2   | -0. 182781097 | 0. 014326 | 0. 034604 |
| IL16      | 15q25. 1  | -0. 182779905 | 0. 014327 | 0. 034604 |
| SORBS2    | 4q35. 1   | -0. 182765259 | 0. 014335 | 0. 034619 |
| AGPAT5    | 8p23. 1   | -0. 182733873 | 0. 014352 | 0. 034654 |
| TBL2      | 7q11. 23  | 0. 182731781  | 0. 014353 | 0. 034654 |
| MTNR1A    | 4q35. 2   | -0. 182729119 | 0. 014354 | 0. 034654 |
| MMP15     | 16q21     | 0. 182719227  | 0. 01436  | 0. 034663 |
| ZDHC22    | 14q24. 3  | -0. 182679196 | 0. 014382 | 0. 034711 |
| MSX2P1    | 17q22     | -0. 182648254 | 0. 014398 | 0. 034748 |
| LHX9      | 1q31. 3   | 0. 182578403  | 0. 014436 | 0. 034833 |
| PHACTR4   | 1p35. 3   | -0. 182576946 | 0. 014437 | 0. 034833 |
| NXPE4     | 11q23. 2  | -0. 182551346 | 0. 014451 | 0. 034863 |
| PKP4      | 2q24. 1   | 0. 182530915  | 0. 014462 | 0. 034885 |
| SIRPA     | 20p13     | -0. 182493252 | 0. 014483 | 0. 034931 |
| EPGN      | 4q13. 3   | 0. 182462961  | 0. 0145   | 0. 034966 |
| ACSL4     | Xq23      | -0. 182449313 | 0. 014507 | 0. 03498  |
| LINC00839 | 10q11. 21 | -0. 182428389 | 0. 014518 | 0. 035004 |
| CEP57L1   | 6q21      | -0. 182415835 | 0. 014525 | 0. 035016 |
| PIN4P1    | 15q15. 3  | 0. 182384545  | 0. 014543 | 0. 035053 |
| CST13P    | 20p11. 21 | 0. 182372171  | 0. 014549 | 0. 035064 |
| TBC1D4    | 13q22. 2  | -0. 182369803 | 0. 014551 | 0. 035064 |
| BUB3      | 10q26. 13 | 0. 182357249  | 0. 014558 | 0. 035077 |
| GLP1R     | 6p21. 2   | -0. 182333393 | 0. 014571 | 0. 035104 |
| EIF4G3    | 1p36. 12  | -0. 182327956 | 0. 014574 | 0. 035107 |
| FAM66A    | 8p23. 1   | -0. 182314358 | 0. 014581 | 0. 035121 |
| NPHP1     | 2q13      | -0. 182296571 | 0. 014591 | 0. 03514  |
| SHISA4    | 1q32. 1   | 0. 182286109  | 0. 014597 | 0. 03515  |
| TMEM233   | 12q24. 23 | -0. 182252726 | 0. 014615 | 0. 03519  |
| OR5E1P    | 11p15. 4  | 0. 182231408  | 0. 014627 | 0. 035214 |
| PYGL      | 14q22. 1  | 0. 182219153  | 0. 014634 | 0. 035226 |
| NIBAN3    | 19p13. 11 | -0. 182191997 | 0. 014649 | 0. 035258 |
| IL23R     | 1p31. 3   | -0. 182174927 | 0. 014658 | 0. 035275 |
| RAB5A     | 3p24. 3   | 0. 182173122  | 0. 014659 | 0. 035275 |
| ESRRG     | 1q41      | -0. 182166845 | 0. 014663 | 0. 035279 |
| ATP6V1F   | 7q32. 1   | 0. 18216266   | 0. 014665 | 0. 03528  |
| C19ORF47  | 19q13. 2  | 0. 182158475  | 0. 014667 | 0. 035281 |
| SNORA3B   | 11p15. 4  | 0. 182142829  | 0. 014676 | 0. 035296 |
| LINC00167 | 11q24. 3  | -0. 182141325 | 0. 014677 | 0. 035296 |
| MPV17L    | 16p13. 11 | -0. 18212709  | 0. 014685 | 0. 03531  |
| PSAT1     | 9q21. 2   | -0. 182116628 | 0. 01469  | 0. 03532  |
| DGCR11    | 22q11. 21 | 0. 182108259  | 0. 014695 | 0. 035327 |

|           |           |              |          |          |
|-----------|-----------|--------------|----------|----------|
| PCDHA11   | 5q31.3    | -0.182075733 | 0.014713 | 0.035366 |
| CD276     | 15q24.1   | 0.182037118  | 0.014734 | 0.035412 |
| NCOA3     | 20q13.12  | -0.182035026 | 0.014736 | 0.035412 |
| SPAG9     | 17q21.33  | -0.182026657 | 0.01474  | 0.035419 |
| MS4A2     | 11q12.1   | -0.181970163 | 0.014772 | 0.03549  |
| GCOM1     | 15q21.3   | 0.181928316  | 0.014795 | 0.03554  |
| NUP155    | 5p13.2    | -0.181926224 | 0.014796 | 0.03554  |
| HIST1H2AI | 6p22.2    | 0.181901178  | 0.01481  | 0.03557  |
| SEC23IP   | 10q26.11- | -0.181863453 | 0.014831 | 0.035616 |
| RUBCN     | 3q29      | -0.181844622 | 0.014842 | 0.035637 |
| NIP7      | 16q22.1   | 0.181832067  | 0.014849 | 0.03565  |
| TMEM151B  | 6p21.1    | -0.181765112 | 0.014886 | 0.035735 |
| CASC1     | 12p12.1   | -0.181760927 | 0.014889 | 0.035737 |
| DENR      | 12q24.31  | -0.181748373 | 0.014896 | 0.035749 |
| RNASE10   | 14q11.2   | 0.181734644  | 0.014903 | 0.03576  |
| RAB3GAP2  | 1q41      | -0.181733727 | 0.014904 | 0.03576  |
| FAM71E2   | 19q13.42  | 0.181711325  | 0.014916 | 0.035786 |
| GAS2L3    | 12q23.1   | -0.181665059 | 0.014942 | 0.035842 |
| RANBP3L   | 5p13.2    | -0.181663474 | 0.014943 | 0.035842 |
| DCP2      | 5q22.2    | -0.181660494 | 0.014945 | 0.035842 |
| AVPR1A    | 12q14.2   | -0.181649176 | 0.014951 | 0.035853 |
| MEAF6     | 1p34.3    | -0.181606093 | 0.014976 | 0.035907 |
| FOXD4L5   | 9q21.11   | 0.181593883  | 0.014983 | 0.035919 |
| MAS1L     | 6p22.1    | -0.181581164 | 0.01499  | 0.035932 |
| SUZ12     | 17q11.2   | -0.181560061 | 0.015002 | 0.035954 |
| ZNF610    | 19q13.41  | -0.181557969 | 0.015003 | 0.035954 |
| SFTPC     | 8p21.3    | -0.181538337 | 0.015014 | 0.035977 |
| ZNF215    | 11p15.4   | 0.18152354   | 0.015022 | 0.035992 |
| TOP2A     | 17q21.2   | 0.181516122  | 0.015026 | 0.035998 |
| ATP2C1    | 3q22.1    | 0.181447074  | 0.015065 | 0.036087 |
| ZC3H18    | 16q24.2   | 0.181436612  | 0.015071 | 0.036097 |
| LRRTM4    | 2p12      | -0.181405405 | 0.015089 | 0.036135 |
| CUL7      | 6p21.1    | -0.181401042 | 0.015092 | 0.036137 |
| DUS1L     | 17q25.3   | 0.181394765  | 0.015095 | 0.036141 |
| ANK1      | 8p11.21   | 0.181346641  | 0.015122 | 0.036202 |
| ATXN7     | 3p14.1    | -0.181338271 | 0.015127 | 0.036209 |
| FRZB      | 2q32.1    | -0.181277593 | 0.015162 | 0.036283 |
| ELK3      | 12q23.1   | -0.181277593 | 0.015162 | 0.036283 |
| ZBED8     | 5q33.3    | -0.181271316 | 0.015165 | 0.036287 |
| CPNE3     | 8q21.3    | -0.181254577 | 0.015175 | 0.036306 |
| CBX4      | 17q25.3   | 0.181237838  | 0.015184 | 0.036324 |
| IL5RA     | 3p26.2    | -0.181226722 | 0.015191 | 0.036335 |
| HOXA9     | 7p15.2    | 0.181214822  | 0.015198 | 0.036347 |
| AKR7A3    | 1p36.13   | 0.181191806  | 0.015211 | 0.03637  |
| DNAJB11   | 3q27.3    | 0.181191806  | 0.015211 | 0.03637  |
| ZNF821    | 16q22.2   | -0.18114159  | 0.015239 | 0.036434 |
| ZSCAN12   | 6p22.1    | -0.181137405 | 0.015242 | 0.036435 |
| MIR100HG  | 11q24.1   | -0.18110602  | 0.01526  | 0.036474 |
| MYRF-AS1  | 11q12.2   | 0.181094736  | 0.015266 | 0.036485 |
| RBM26     | 13q31.1   | -0.181055803 | 0.015289 | 0.036534 |
| ZFAND6    | 15q25.1   | 0.181047434  | 0.015293 | 0.036541 |
| TSC22D1   | 13q14.11  | 0.180995125  | 0.015323 | 0.036609 |
| CDIPTOSP  | 16p11.2   | 0.180983948  | 0.01533  | 0.03662  |
| KIFAP3    | 1q24.2    | -0.180921892 | 0.015366 | 0.036701 |

|           |           |               |           |           |
|-----------|-----------|---------------|-----------|-----------|
| TKT       | 3p21. 1   | 0. 180900969  | 0. 015378 | 0. 036724 |
| PKD1      | 16p13. 3  | -0. 180898876 | 0. 015379 | 0. 036724 |
| TRDN      | 6q22. 31  | -0. 180894022 | 0. 015382 | 0. 036726 |
| ATP2B4    | 1q32. 1   | 0. 180867491  | 0. 015397 | 0. 036758 |
| ZNF706    | 8q22. 3   | 0. 180857029  | 0. 015403 | 0. 036768 |
| NCAPH     | 2q11. 2   | 0. 180850752  | 0. 015407 | 0. 036771 |
| PARD3B    | 2q33. 3   | -0. 18084866  | 0. 015408 | 0. 036771 |
| LINC00346 | 13q34     | 0. 180775427  | 0. 01545  | 0. 036867 |
| FUT11     | 10q22. 2  | -0. 180762873 | 0. 015457 | 0. 03688  |
| PLXNA1    | 3q21. 3   | 0. 180731488  | 0. 015476 | 0. 036919 |
| HDX       | Xq21. 1   | -0. 180704287 | 0. 015491 | 0. 036951 |
| DUSP8     | 11p15. 5  | -0. 180702195 | 0. 015493 | 0. 036951 |
| ZNF492    | 19p12     | -0. 180682641 | 0. 015504 | 0. 036974 |
| LUZP1     | 1p36. 12  | -0. 180658255 | 0. 015518 | 0. 037002 |
| CCDC6     | 10q21. 2  | 0. 180656163  | 0. 015519 | 0. 037002 |
| GPR12     | 13q12. 13 | -0. 180595947 | 0. 015554 | 0. 03708  |
| ANKRD36   | 2q11. 2   | 0. 180593392  | 0. 015556 | 0. 03708  |
| TMEM65    | 8q24. 13  | -0. 180559915 | 0. 015575 | 0. 03712  |
| NEU2      | 2q37. 1   | 0. 180558342  | 0. 015576 | 0. 03712  |
| ARF3      | 12q13. 12 | -0. 18054736  | 0. 015583 | 0. 037131 |
| NIPAL4    | 5q33. 3   | 0. 18054088   | 0. 015586 | 0. 037135 |
| C1QTNF6   | 22q12. 3  | 0. 180505513  | 0. 015607 | 0. 03718  |
| MRPL47    | 3q26. 33  | 0. 180478313  | 0. 015623 | 0. 037213 |
| DISC2     | 1q42. 2   | 0. 180470559  | 0. 015628 | 0. 03722  |
| HDAC11    | 3p25. 1   | 0. 180453204  | 0. 015638 | 0. 037239 |
| ODF3L1    | 15q24. 2  | -0. 18040508  | 0. 015666 | 0. 037302 |
| PCDHB18P  | 5q31. 3   | -0. 180392526 | 0. 015673 | 0. 037315 |
| FLG2      | 1q21. 3   | -0. 180386078 | 0. 015677 | 0. 037318 |
| ARHGAP25  | 2p13. 3   | -0. 180384157 | 0. 015678 | 0. 037318 |
| PIK3CD    | 1p36. 22  | -0. 18036951  | 0. 015687 | 0. 037334 |
| STBD1     | 4q21. 1   | -0. 180294185 | 0. 015731 | 0. 037435 |
| SFPQ      | 1p34. 3   | -0. 180250246 | 0. 015757 | 0. 037492 |
| HYPK      | 15q15. 3  | 0. 180208399  | 0. 015782 | 0. 037546 |
| HMSD      | 18q22. 1  | 0. 180203732  | 0. 015784 | 0. 037548 |
| HAS2-AS1  | 8q24. 13  | -0. 180200501 | 0. 015786 | 0. 037548 |
| FCRLB     | 1q23. 3   | 0. 180189568  | 0. 015793 | 0. 037556 |
| SCGB1B2P  | 19q13. 11 | 0. 180188616  | 0. 015793 | 0. 037556 |
| SYCE3     | 22q13. 33 | 0. 180128681  | 0. 015829 | 0. 037636 |
| CYP8B1    | 3p22. 1   | -0. 18012142  | 0. 015833 | 0. 037641 |
| FAM167A-1 | 8p23. 1   | -0. 18011879  | 0. 015834 | 0. 037641 |
| VWC2L     | 2q34-q35  | -0. 18010239  | 0. 015844 | 0. 037659 |
| NUDT15    | 13q14. 2  | 0. 18007658   | 0. 015859 | 0. 037691 |
| CARF      | 2q33. 2   | -0. 18001381  | 0. 015897 | 0. 037775 |
| TAP2      | 6p21. 32  | 0. 179963593  | 0. 015927 | 0. 037842 |
| HEPACAM   | 11q24. 2  | -0. 179941573 | 0. 01594  | 0. 037868 |
| EIF2B5    | 3q27. 1   | 0. 179905007  | 0. 015961 | 0. 037915 |
| CPT1B     | 22q13. 33 | 0. 17989873   | 0. 015965 | 0. 037915 |
| SOX13     | 1q32. 1   | 0. 17989873   | 0. 015965 | 0. 037915 |
| ZNF174    | 16p13. 3  | -0. 179885224 | 0. 015973 | 0. 03793  |
| LONRF3    | Xq24      | 0. 179877806  | 0. 015978 | 0. 037931 |
| PPID      | 4q32. 1   | -0. 179877806 | 0. 015978 | 0. 037931 |
| INTS11    | 1p36. 33  | 0. 179773189  | 0. 01604  | 0. 038075 |
| TUSC1     | 9p21. 2   | -0. 179769004 | 0. 016043 | 0. 038077 |
| TMEM8A    | 16p13. 3  | 0. 179760634  | 0. 016048 | 0. 038084 |

|           |            |              |          |          |
|-----------|------------|--------------|----------|----------|
| EAF1      | 3p25. 1    | -0.17975645  | 0.01605  | 0.038085 |
| UGGT1     | 2q14. 3    | -0.17974808  | 0.016055 | 0.038093 |
| PPM1L     | 3q25. 33-c | -0.179725064 | 0.016069 | 0.038121 |
| PRKCQ     | 10p15. 1   | -0.17971251  | 0.016076 | 0.038134 |
| GOLGA4    | 3p22. 2    | -0.179704141 | 0.016081 | 0.038142 |
| FIGLA     | 2p13. 3    | -0.179698671 | 0.016085 | 0.038145 |
| DHRS4L1   | 14q11. 2   | -0.179660201 | 0.016108 | 0.038195 |
| TTLL3     | 3p25. 3    | 0.179651832  | 0.016113 | 0.038202 |
| GABRG3    | 15q12      | -0.179646344 | 0.016116 | 0.038206 |
| ZNF302    | 19q13. 11  | -0.179626724 | 0.016128 | 0.038228 |
| KCNAB2    | 1p36. 31   | -0.179624631 | 0.016129 | 0.038228 |
| MAGEA1    | Xq28       | -0.179611794 | 0.016137 | 0.038241 |
| TLX2      | 2p13. 1    | 0.179570915  | 0.016161 | 0.038295 |
| B3GALT5-A | 21q22. 2   | 0.179563001  | 0.016166 | 0.038302 |
| SLC6A5    | 11p15. 1   | -0.179546004 | 0.016176 | 0.038322 |
| FBL       | 19q13. 2   | 0.179513736  | 0.016196 | 0.038362 |
| SPRTN     | 1q42. 2    | -0.179511644 | 0.016197 | 0.038362 |
| ZBTB45    | 19q13. 43  | 0.179494905  | 0.016207 | 0.038381 |
| LRFN3     | 19q13. 12  | 0.179459335  | 0.016229 | 0.038427 |
| LINC01845 | 5q33. 3    | -0.179454296 | 0.016232 | 0.03843  |
| NDUFA5    | 7q31. 32   | -0.179444689 | 0.016238 | 0.038439 |
| UBA2      | 19q13. 11  | -0.179436319 | 0.016243 | 0.038447 |
| ADARB2    | 10p15. 3   | -0.179428751 | 0.016247 | 0.038452 |
| POLDIP3   | 22q13. 2   | -0.179425857 | 0.016249 | 0.038452 |
| EPX       | 17q22      | -0.179418784 | 0.016253 | 0.038455 |
| RNF185    | 22q12. 2   | -0.179417488 | 0.016254 | 0.038455 |
| ZBED4     | 22q13. 33  | -0.179390287 | 0.016271 | 0.03849  |
| UBE2M     | 19q13. 43  | 0.179379825  | 0.016277 | 0.0385   |
| ZNF611    | 19q13. 41  | -0.179360994 | 0.016288 | 0.038523 |
| GGN       | 19q13. 2   | 0.179350626  | 0.016295 | 0.038532 |
| TCTA      | 3p21. 31   | -0.17934844  | 0.016296 | 0.038532 |
| PCSK2     | 20p12. 1   | -0.179338123 | 0.016302 | 0.038542 |
| ORC4      | 2q23. 1    | 0.179331701  | 0.016306 | 0.038546 |
| RILPL1    | 12q24. 31  | -0.179296131 | 0.016328 | 0.038593 |
| ASB5      | 4q34. 2    | -0.179287553 | 0.016333 | 0.038601 |
| CYP4B1    | 1p33       | 0.179281579  | 0.016337 | 0.038605 |
| CELF6     | 15q23      | -0.179252192 | 0.016354 | 0.038636 |
| LOC100130 | 2q31. 2    | -0.179251239 | 0.016355 | 0.038636 |
| GRPEL2    | 5q32       | -0.179250099 | 0.016356 | 0.038636 |
| ERMARD    | 6q27       | -0.179243822 | 0.01636  | 0.038641 |
| ALG14     | 1p21. 3    | -0.179222899 | 0.016372 | 0.038666 |
| DNM1L     | 12p11. 21  | -0.179216622 | 0.016376 | 0.038671 |
| TRIR      | 19p13. 13  | 0.179195698  | 0.016389 | 0.038696 |
| CDC34     | 19p13. 3   | 0.179185236  | 0.016395 | 0.038707 |
| EDAR      | 2q13       | 0.179160503  | 0.01641  | 0.038737 |
| MYO1A     | 12q13. 3   | 0.179158036  | 0.016412 | 0.038737 |
| TGS1      | 8q12. 1    | -0.179151759 | 0.016416 | 0.038737 |
| YIPF6     | Xq12-q13.  | -0.179151759 | 0.016416 | 0.038737 |
| GOSR1     | 17q11. 2   | -0.179145482 | 0.016419 | 0.038741 |
| CNTN2     | 1q32. 1    | -0.179139346 | 0.016423 | 0.038745 |
| CD9       | 12p13. 31  | 0.179130835  | 0.016428 | 0.038753 |
| HPS5      | 11p15. 1   | -0.179124558 | 0.016432 | 0.038758 |
| TARM1     | 19q13. 42  | -0.179110394 | 0.016441 | 0.038773 |
| IL36G     | 2q14. 1    | 0.179049364  | 0.016478 | 0.038857 |

|           |           |              |          |          |
|-----------|-----------|--------------|----------|----------|
| UBTD1     | 10q24.1-c | 0.179038771  | 0.016485 | 0.038868 |
| SIK1      | 21q22.3   | 0.179026217  | 0.016492 | 0.038881 |
| RHOU      | 1q42.13   | -0.17901994  | 0.016496 | 0.038886 |
| FGF9      | 13q12.11  | -0.179013663 | 0.0165   | 0.03889  |
| SLC30A10  | 1q41      | 0.179004883  | 0.016506 | 0.038898 |
| ZMYM5     | 13q12.11  | 0.179001109  | 0.016508 | 0.038899 |
| ATG2A     | 11q13.1   | 0.178967631  | 0.016528 | 0.038943 |
| HLA-DOA   | 6p21.32   | -0.178963447 | 0.016531 | 0.038944 |
| OR11H4    | 14q11.2   | -0.178951724 | 0.016538 | 0.038957 |
| C15ORF41  | 15q14     | 0.178946708  | 0.016541 | 0.038958 |
| CCDC14    | 3q21.1    | 0.178944615  | 0.016543 | 0.038958 |
| CCIN      | 9p13.3    | -0.178883937 | 0.01658  | 0.039041 |
| KDF1      | 1p36.11   | 0.178879752  | 0.016582 | 0.039043 |
| LIPJ      | 10q23.31  | -0.1788655   | 0.016591 | 0.039055 |
| NID1      | 1q42.3    | -0.178865106 | 0.016591 | 0.039055 |
| ONECUT2   | 18q21.31  | 0.178839997  | 0.016607 | 0.039085 |
| GON7      | 14q32.12  | -0.178837905 | 0.016608 | 0.039085 |
| SUCLG2    | 3p14.1    | 0.178825351  | 0.016616 | 0.039099 |
| SLC26A4   | 7q22.3    | -0.178758489 | 0.016657 | 0.039191 |
| ZFAS1     | 20q13.13  | 0.178752119  | 0.016661 | 0.039196 |
| PABPC1L2E | Xq13.2    | -0.178746557 | 0.016665 | 0.039199 |
| PRAP1     | 10q26.3   | 0.178717328  | 0.016683 | 0.039237 |
| SPTLC3    | 20p12.1   | 0.178649593  | 0.016725 | 0.039331 |
| INSYN1    | 15q24.1   | -0.17863504  | 0.016734 | 0.039348 |
| DBN1      | 5q35.3    | 0.178616115  | 0.016745 | 0.039371 |
| TLCD3B    | 16p11.2   | -0.178601843 | 0.016754 | 0.039387 |
| GPR176    | 15q14-q15 | -0.178597284 | 0.016757 | 0.039388 |
| CLYBL     | 13q32.3   | 0.178595192  | 0.016758 | 0.039388 |
| ZSWIM8    | 10q22.2   | -0.178586822 | 0.016764 | 0.039395 |
| CDC42EP3  | 2p22.2    | -0.178563806 | 0.016778 | 0.039421 |
| SLC35F3   | 1q42.2    | -0.178562947 | 0.016779 | 0.039421 |
| GMDS      | 6p25.3    | 0.178542883  | 0.016791 | 0.039445 |
| DOLK      | 9q34.11   | -0.178521959 | 0.016804 | 0.039471 |
| OR9G4     | 11q12.1   | -0.178496798 | 0.01682  | 0.039504 |
| CPSF6     | 12q15     | -0.178492666 | 0.016822 | 0.039505 |
| SLC7A11   | 4q28.3    | 0.178473835  | 0.016834 | 0.039528 |
| FLOT1     | 6p21.33   | 0.17846965   | 0.016837 | 0.039529 |
| FAM174B   | 15q26.1   | -0.17844245  | 0.016854 | 0.039565 |
| OLMALINC  | 10q24.31  | -0.17843408  | 0.016859 | 0.039572 |
| SPATA2L   | 16q24.3   | 0.178408972  | 0.016875 | 0.039605 |
| MCM7      | 7q22.1    | 0.178400603  | 0.01688  | 0.039612 |
| TCTEX1D1  | 1p31.3    | -0.178396418 | 0.016882 | 0.039614 |
| GJA3      | 13q12.11  | -0.178388235 | 0.016888 | 0.039617 |
| TOMM34    | 20q13.12  | 0.178388048  | 0.016888 | 0.039617 |
| NCOA4     | 10q11.22  | -0.178379679 | 0.016893 | 0.039624 |
| GASK1A    | 3p22.1    | -0.178352478 | 0.01691  | 0.03966  |
| GRB14     | 2q24.3    | -0.178325278 | 0.016927 | 0.039695 |
| IL4I1     | 19q13.33  | 0.178321093  | 0.01693  | 0.039696 |
| SIX5      | 19q13.32  | 0.178314816  | 0.016934 | 0.039701 |
| CLASRP    | 19q13.32  | 0.178304354  | 0.01694  | 0.039712 |
| NEK3      | 13q14.3   | 0.178277154  | 0.016957 | 0.039747 |
| PRY2      | Yq11.223  | -0.178258619 | 0.016969 | 0.03977  |
| TTC36     | 11q23.3   | -0.178240651 | 0.01698  | 0.039791 |
| KDM4D     | 11q21     | -0.1782354   | 0.016983 | 0.039795 |

|           |           |              |          |          |
|-----------|-----------|--------------|----------|----------|
| TIMM50    | 19q13.2   | 0.178224845  | 0.01699  | 0.039805 |
| XYLT1     | 16p12.3   | -0.178203921 | 0.017003 | 0.039832 |
| GRM4      | 6p21.31   | -0.178191139 | 0.017011 | 0.039846 |
| SLC5A8    | 12q23.1-c | -0.178174623 | 0.017022 | 0.039865 |
| ASIP      | 20q11.22  | 0.178169507  | 0.017025 | 0.039868 |
| IMP3      | 15q24.2   | 0.178162074  | 0.01703  | 0.039875 |
| ASB2      | 14q32.12  | -0.178132781 | 0.017048 | 0.039913 |
| PPP4R3A   | 14q32.12  | -0.178120227 | 0.017056 | 0.039927 |
| SHTN1     | 10q25.3   | -0.178088841 | 0.017076 | 0.039969 |
| XPNPEP3   | 22q13.2   | -0.178059548 | 0.017094 | 0.040007 |
| ZNF823    | 19p13.2   | 0.178046994  | 0.017102 | 0.040021 |
| UBQLNL    | 11p15.4   | 0.178003055  | 0.01713  | 0.040082 |
| PWAR1     | 15q11.2   | -0.177984566 | 0.017142 | 0.040104 |
| MRPS17    | 7p11.2    | 0.177980039  | 0.017145 | 0.040107 |
| PTN       | 7q33      | -0.177973762 | 0.017149 | 0.040108 |
| CCDC168   | 13q33.1   | -0.177972402 | 0.017149 | 0.040108 |
| ZNF512B   | 20q13.33  | -0.177913084 | 0.017187 | 0.040192 |
| PTPN21    | 14q31.3   | -0.177860775 | 0.01722  | 0.040263 |
| KLF6      | 10p15.2   | 0.17785659   | 0.017223 | 0.040263 |
| GPIHBP1   | 8q24.3    | -0.177855637 | 0.017224 | 0.040263 |
| CD1A      | 1q23.1    | 0.177843804  | 0.017231 | 0.040274 |
| CSDE1     | 1p13.2    | -0.177841943 | 0.017232 | 0.040274 |
| PLEKHA6   | 1q32.1    | 0.177816835  | 0.017248 | 0.040301 |
| TM9SF4    | 20q11.21  | 0.177816835  | 0.017248 | 0.040301 |
| WDR49     | 3q26.1    | -0.177814331 | 0.01725  | 0.040301 |
| FBLN1     | 22q13.31  | -0.177804281 | 0.017256 | 0.040311 |
| FOXP4     | 6p21.1    | -0.177772896 | 0.017276 | 0.040353 |
| DEPDC1    | 1p31.3    | 0.177739418  | 0.017298 | 0.040399 |
| RHOB      | 2p24.1    | 0.177731048  | 0.017303 | 0.040406 |
| ABCB10    | 1q42.13   | -0.177724771 | 0.017307 | 0.040411 |
| TREM2     | 6p21.1    | 0.177710125  | 0.017317 | 0.040428 |
| LINC00111 | 21q22.3   | 0.177664469  | 0.017346 | 0.040492 |
| CBLN2     | 18q22.3   | -0.177658703 | 0.017349 | 0.040496 |
| CAPNS2    | 16q12.2   | 0.17764143   | 0.01736  | 0.040517 |
| SOX2      | 3q26.33   | -0.177637264 | 0.017363 | 0.040518 |
| PRSS27    | 16p13.3   | 0.177607599  | 0.017382 | 0.040558 |
| WDR88     | 19q13.11  | -0.177513208 | 0.017443 | 0.040695 |
| SH3PXD2A  | 10q24.33  | -0.177490427 | 0.017458 | 0.040724 |
| IFITM1    | 11p15.5   | 0.17748415   | 0.017462 | 0.040729 |
| RAB4B     | 19q13.2   | 0.177465319  | 0.017474 | 0.040752 |
| RPIA      | 2p11.2    | 0.177431841  | 0.017495 | 0.040798 |
| GANAB     | 11q12.3   | -0.177408826 | 0.01751  | 0.040828 |
| NCS1      | 9q34.11   | -0.17738581  | 0.017525 | 0.040858 |
| SUPT16H   | 14q11.2   | -0.177379533 | 0.017529 | 0.040861 |
| MANSC1    | 12p13.2   | 0.17737744   | 0.01753  | 0.040861 |
| TGM1      | 14q12     | 0.177364886  | 0.017539 | 0.040875 |
| HLA-DPA1  | 6p21.32   | -0.177337685 | 0.017556 | 0.040911 |
| EFCAB8    | 20q11.21  | -0.177315096 | 0.017571 | 0.040927 |
| ARAP1     | 11q13.4   | -0.17731467  | 0.017571 | 0.040927 |
| NFIL3     | 9q22.31   | -0.17731467  | 0.017571 | 0.040927 |
| CDR1      | Xq27.1    | -0.177314281 | 0.017571 | 0.040927 |
| IKBKG     | Xq28      | 0.177287469  | 0.017589 | 0.040963 |
| WDFY4     | 10q11.23  | -0.177274915 | 0.017597 | 0.040977 |
| ZUP1      | 6q22.1    | -0.177249806 | 0.017613 | 0.04101  |

|          |           |               |           |           |
|----------|-----------|---------------|-----------|-----------|
| TBKBP1   | 17q21. 32 | -0. 177230975 | 0. 017625 | 0. 041034 |
| C9ORF43  | 9q32      | -0. 177201775 | 0. 017644 | 0. 041069 |
| FAM20A   | 17q24. 2  | -0. 177201682 | 0. 017644 | 0. 041069 |
| TEPP     | 16q21     | -0. 177192015 | 0. 017651 | 0. 041079 |
| PPAN     | 19p13. 2  | 0. 177159835  | 0. 017672 | 0. 041121 |
| LPAR6    | 13q14. 2  | 0. 177157743  | 0. 017673 | 0. 041121 |
| CCNL2    | 1p36. 33  | 0. 177145189  | 0. 017681 | 0. 041135 |
| FGF8     | 10q24. 32 | 0. 177116792  | 0. 0177   | 0. 041173 |
| KLC4     | 6p21. 1   | 0. 177111711  | 0. 017703 | 0. 041176 |
| CDC42SE1 | 1q21. 3   | 0. 177101249  | 0. 01771  | 0. 041187 |
| MEN1     | 11q13. 1  | 0. 177094972  | 0. 017714 | 0. 041192 |
| TMCC1    | 3q22. 1   | 0. 177086603  | 0. 017719 | 0. 0412   |
| HEPHL1   | 11q21     | 0. 177078417  | 0. 017725 | 0. 041208 |
| SNRK     | 3p22. 1   | -0. 177063587 | 0. 017734 | 0. 041225 |
| ILKAP    | 2q37. 3   | 0. 177036386  | 0. 017752 | 0. 041262 |
| TCF12    | 15q21. 3  | -0. 176938045 | 0. 017816 | 0. 041407 |
| UNK      | 17q25. 1  | -0. 176929676 | 0. 017822 | 0. 041415 |
| INE1     | Xp11. 3   | 0. 176917122  | 0. 01783  | 0. 041429 |
| SPAST    | 2p22. 3   | -0. 176879459 | 0. 017855 | 0. 041482 |
| STK36    | 2q35      | 0. 176858536  | 0. 017869 | 0. 041509 |
| FBXL3    | 13q22. 3  | -0. 176825058 | 0. 017891 | 0. 041555 |
| PARP14   | 3q21. 1   | 0. 176789488  | 0. 017914 | 0. 041605 |
| LEPROT   | 1p31. 3   | -0. 176739271 | 0. 017947 | 0. 041668 |
| NPY2R    | 4q32. 1   | -0. 17673772  | 0. 017948 | 0. 041668 |
| CARTPT   | 5q13. 2   | -0. 176736911 | 0. 017949 | 0. 041668 |
| ADD1     | 4p16. 3   | -0. 176735087 | 0. 01795  | 0. 041668 |
| DIRC3    | 2q35      | 0. 176699517  | 0. 017973 | 0. 041718 |
| SEPTIN6  | Xq24      | -0. 176663947 | 0. 017997 | 0. 041768 |
| CENPE    | 4q24      | 0. 17665767   | 0. 018001 | 0. 041773 |
| SEC14L3  | 22q12. 2  | -0. 176624726 | 0. 018023 | 0. 041818 |
| EVC      | 4p16. 2   | -0. 176546775 | 0. 018075 | 0. 041933 |
| PPP1R26  | 9q34. 3   | 0. 176502835  | 0. 018104 | 0. 041996 |
| HAS2     | 8q24. 13  | -0. 176496558 | 0. 018108 | 0. 042001 |
| NUGGC    | 8p21. 1   | -0. 176473634 | 0. 018123 | 0. 042031 |
| PUDP     | Xp22. 31  | 0. 176469357  | 0. 018126 | 0. 042033 |
| GPR179   | 17q12     | -0. 17646665  | 0. 018128 | 0. 042033 |
| STK16    | 2q35      | 0. 176454711  | 0. 018136 | 0. 042046 |
| AURKAIP1 | 1p36. 33  | 0. 176412864  | 0. 018164 | 0. 042106 |
| SFXN5    | 2p13. 2   | -0. 17640031  | 0. 018172 | 0. 04212  |
| PHC2     | 1p35. 1   | 0. 176396125  | 0. 018175 | 0. 042122 |
| POMGNT2  | 3p22. 1   | -0. 176360555 | 0. 018199 | 0. 042166 |
| CCDC144B | 17p11. 2  | -0. 176358832 | 0. 0182   | 0. 042166 |
| FAAP20   | 1p36. 33  | 0. 176358463  | 0. 0182   | 0. 042166 |
| ARID3C   | 9p13. 3   | 0. 17634553   | 0. 018209 | 0. 042181 |
| ANKRD37  | 4q35. 1   | 0. 176314523  | 0. 018229 | 0. 042224 |
| NEO1     | 15q24. 1  | -0. 176297784 | 0. 01824  | 0. 042245 |
| WDR77    | 1p13. 2   | 0. 176291507  | 0. 018245 | 0. 04225  |
| LPAR4    | Xq21. 1   | -0. 176206734 | 0. 018301 | 0. 042376 |
| EBI3     | 19p13. 3  | -0. 176199443 | 0. 018306 | 0. 042383 |
| ARX      | Xp21. 3   | -0. 1761943   | 0. 01831  | 0. 042386 |
| PI16     | 6p21. 2   | -0. 176185166 | 0. 018316 | 0. 042395 |
| HERC4    | 10q21. 3  | 0. 17617852   | 0. 01832  | 0. 0424   |
| LARP1B   | 4q28. 2   | -0. 176163873 | 0. 01833  | 0. 042418 |
| GPR85    | 7q31. 1   | -0. 176145042 | 0. 018343 | 0. 042439 |



|           |           |              |          |          |
|-----------|-----------|--------------|----------|----------|
| SNORA26   | 4q12      | -0.176144389 | 0.018343 | 0.042439 |
| FOXA1     | 14q21.1   | 0.176138857  | 0.018347 | 0.042442 |
| NRBP1     | 2p23.3    | 0.176105287  | 0.01837  | 0.04249  |
| SIGMAR1   | 9p13.3    | 0.176092733  | 0.018378 | 0.042504 |
| UBB       | 17p11.2   | -0.176073902 | 0.018391 | 0.042522 |
| VCPIP1    | 8q13.1    | -0.176073902 | 0.018391 | 0.042522 |
| JMJD7-PLA | 15q15.1   | 0.17607181   | 0.018392 | 0.042522 |
| SORL1     | 11q24.1   | -0.176048794 | 0.018408 | 0.042553 |
| SUDS3     | 12q24.23  | -0.176011131 | 0.018433 | 0.042607 |
| KCNA10    | 1p13.3    | 0.175985588  | 0.01845  | 0.042642 |
| CA11      | 19q13.33  | -0.175975561 | 0.018457 | 0.042651 |
| PDHX      | 11p13     | -0.175973469 | 0.018459 | 0.042651 |
| FOXM1     | 12p13.33  | 0.175969284  | 0.018461 | 0.042653 |
| CD207     | 2p13.3    | 0.17594636   | 0.018477 | 0.042684 |
| SPIN4     | Xq11.1    | 0.175937899  | 0.018483 | 0.042692 |
| PIM1      | 6p21.2    | 0.175933714  | 0.018485 | 0.042693 |
| AGO4      | 1p34.3    | -0.175914883 | 0.018498 | 0.042713 |
| SLC66A2   | 18q23     | -0.175914883 | 0.018498 | 0.042713 |
| ZNF501    | 3p21.31   | -0.175906514 | 0.018504 | 0.04272  |
| FAM180B   | 11p11.2   | -0.175904249 | 0.018505 | 0.04272  |
| GPR158-AS | 10p12.1   | -0.175894384 | 0.018512 | 0.04273  |
| CPA3      | 3q24      | -0.175866759 | 0.018531 | 0.042769 |
| DDC       | 7p12.2-p1 | -0.175834419 | 0.018553 | 0.042814 |
| MAP1LC3C  | 1q43      | -0.175785914 | 0.018586 | 0.042885 |
| CRIM1     | 2p22.2    | -0.175753771 | 0.018608 | 0.042931 |
| REEP2     | 5q31.2    | -0.17574331  | 0.018615 | 0.042942 |
| GTF2H4    | 6p21.33   | 0.175703555  | 0.018642 | 0.043    |
| MED22     | 9q34.2    | -0.175670077 | 0.018665 | 0.043048 |
| ETV1      | 7p21.2    | -0.175634507 | 0.018689 | 0.043099 |
| AUNIP     | 1p36.11   | 0.175624045  | 0.018696 | 0.04311  |
| GRAP      | 17p11.2   | -0.175613584 | 0.018703 | 0.043122 |
| PGC       | 6p21.1    | 0.175563926  | 0.018737 | 0.043195 |
| TWIST2    | 2q37.3    | -0.17555709  | 0.018742 | 0.043199 |
| PIGQ      | 16p13.3   | 0.175554998  | 0.018743 | 0.043199 |
| WNT11     | 11q13.5   | 0.175494319  | 0.018785 | 0.04329  |
| ATP5F1C   | 10p14     | 0.175483857  | 0.018792 | 0.043293 |
| PUS1      | 12q24.33  | 0.175483857  | 0.018792 | 0.043293 |
| TNFRSF10E | 8p21.3    | 0.175481765  | 0.018794 | 0.043293 |
| TENM1     | Xq25      | -0.17548004  | 0.018795 | 0.043293 |
| BMP5      | 6p12.1    | -0.175452858 | 0.018813 | 0.043331 |
| GRSF1     | 4q13.3    | -0.175439918 | 0.018822 | 0.043346 |
| OPRL1     | 20q13.33  | -0.175421087 | 0.018835 | 0.043371 |
| SEC61A2   | 10p14     | -0.17541481  | 0.01884  | 0.043376 |
| LILRB2    | 19q13.42  | -0.175402256 | 0.018848 | 0.043391 |
| SYTL5     | Xp11.4    | 0.175356224  | 0.01888  | 0.043459 |
| SPTSSB    | 3q26.1    | 0.175297638  | 0.01892  | 0.043547 |
| DAXX      | 6p21.32   | 0.175220221  | 0.018974 | 0.043665 |
| SMDT1     | 22q13.2   | -0.175186743 | 0.018997 | 0.043712 |
| EIF3G     | 19p13.2   | 0.17518465   | 0.018999 | 0.043712 |
| MAPK8IP2  | 22q13.33  | -0.175172096 | 0.019007 | 0.043727 |
| PGM2L1    | 11q13.4   | 0.175146988  | 0.019025 | 0.043762 |
| TMEM87B   | 2q13      | 0.175088402  | 0.019065 | 0.04385  |
| DMWD      | 19q13.32  | 0.175084217  | 0.019068 | 0.043852 |
| UBE2V1    | 20q13.13  | 0.175065386  | 0.019081 | 0.043877 |

|            |           |              |          |          |
|------------|-----------|--------------|----------|----------|
| GNPTG      | 16p13.3   | 0.175038186  | 0.0191   | 0.043916 |
| STAC2      | 17q12     | 0.175002615  | 0.019125 | 0.043968 |
| CYP20A1    | 2q33.2    | -0.174914828 | 0.019186 | 0.044103 |
| ALX3       | 1p13.3    | -0.174903411 | 0.019194 | 0.044117 |
| CLBA1      | 14q32.33  | 0.174887536  | 0.019205 | 0.044137 |
| PTRHD1     | 2p23.3    | 0.174877074  | 0.019213 | 0.044149 |
| DTHD1      | 4p14      | -0.1748486   | 0.019233 | 0.04419  |
| P2RX1      | 17p13.2   | -0.174833135 | 0.019244 | 0.044209 |
| ZNF839     | 14q32.31  | -0.174826857 | 0.019248 | 0.044214 |
| UNCX       | 7p22.3    | -0.174811748 | 0.019259 | 0.044234 |
| SLC17A8    | 12q23.1   | -0.17477443  | 0.019285 | 0.044289 |
| FAIM2      | 12q13.12  | -0.174764087 | 0.019292 | 0.0443   |
| CD40LG     | Xq26.3    | -0.174751624 | 0.019301 | 0.044312 |
| BMS1P2     | 10q11.22  | 0.174747348  | 0.019304 | 0.044312 |
| GORASP2    | 2q31.1    | 0.174747348  | 0.019304 | 0.044312 |
| UCN3       | 10p15.1   | -0.174735728 | 0.019312 | 0.044326 |
| SDR42E1    | 16q23.3   | 0.174715963  | 0.019326 | 0.044347 |
| NAT10      | 11p13     | 0.174715963  | 0.019326 | 0.044347 |
| CCDC91     | 12p11.22  | -0.174711778 | 0.019329 | 0.044349 |
| CD28       | 2q33.2    | -0.174684577 | 0.019348 | 0.044388 |
| EIF2B3     | 1p34.1    | -0.174676208 | 0.019354 | 0.044396 |
| RPS16      | 19q13.2   | 0.174653192  | 0.01937  | 0.044428 |
| ZNF571     | 19q13.12  | -0.174646915 | 0.019374 | 0.044433 |
| RXFP3      | 5p13.2    | -0.174618402 | 0.019395 | 0.044474 |
| CCDC183    | 9q34.3    | 0.174598791  | 0.019408 | 0.044501 |
| NDUFA4     | 7p21.3    | 0.174554851  | 0.019439 | 0.044567 |
| TTC23L     | 5p13.2    | -0.174532018 | 0.019456 | 0.044592 |
| SLC25A18   | 22q11.21  | -0.174531835 | 0.019456 | 0.044592 |
| LCE1E      | 1q21.3    | 0.174530325  | 0.019457 | 0.044592 |
| IL10       | 1q32.1    | -0.174518326 | 0.019465 | 0.044606 |
| CSN2       | 4q13.3    | -0.174514673 | 0.019468 | 0.044607 |
| TCIM       | 8p11.21   | 0.174469065  | 0.0195   | 0.044674 |
| ZMPSTE24   | 1p34.2    | -0.174466972 | 0.019502 | 0.044674 |
| GABPB1-IT1 | 15q21.2   | -0.17445651  | 0.019509 | 0.044684 |
| DNAJC2     | 7q22.1    | 0.174454418  | 0.019511 | 0.044684 |
| MUC2       | 11p15.5   | 0.174442256  | 0.019519 | 0.044699 |
| MDS2       | 1p36.11   | -0.174431686 | 0.019527 | 0.044711 |
| PAGE2B     | Xp11.21   | 0.17437405   | 0.019568 | 0.044799 |
| CLOCK      | 4q12      | -0.174356077 | 0.01958  | 0.044822 |
| ZSCAN22    | 19q13.43  | -0.174353985 | 0.019582 | 0.044822 |
| FLT3LG     | 19q13.33  | 0.174347708  | 0.019586 | 0.044827 |
| RAET1G     | 6q25.1    | 0.174328877  | 0.0196   | 0.044852 |
| CENPF      | 1q41      | 0.174318415  | 0.019607 | 0.044864 |
| CACNA2D3   | 3p21.1-p1 | -0.174299675 | 0.019621 | 0.04489  |
| ITIH5      | 10p14     | -0.174268198 | 0.019643 | 0.044936 |
| SLC35D2    | 9q22.32   | 0.174249367  | 0.019657 | 0.044962 |
| MBD3L1     | 19p13.2   | -0.174229503 | 0.019671 | 0.044989 |
| TEX13B     | Xq22.3    | 0.174205912  | 0.019688 | 0.045022 |
| HIST1H1B   | 6p22.1    | 0.174190967  | 0.019698 | 0.045042 |
| RUFY2      | 10q21.3   | -0.174153119 | 0.019725 | 0.045098 |
| PODN       | 1p32.3    | -0.174048501 | 0.0198   | 0.045265 |
| FAM133A    | Xq21.32   | -0.174027941 | 0.019815 | 0.045293 |
| ANKRD26P3  | 13q12.11  | -0.174024698 | 0.019817 | 0.045293 |
| BIN3-IT1   | 8p21.3    | 0.174019462  | 0.019821 | 0.045297 |

|           |          |              |          |          |
|-----------|----------|--------------|----------|----------|
| IDH2      | 15q26.1  | -0.174000377 | 0.019835 | 0.045323 |
| AHCYL2    | 7q32.1   | 0.1739941    | 0.019839 | 0.045328 |
| ATP5F1D   | 19p13.3  | 0.173939698  | 0.019879 | 0.045413 |
| HILPDA    | 7q32.1   | 0.173906221  | 0.019903 | 0.045463 |
| FCRL3     | 1q23.1   | -0.173862326 | 0.019934 | 0.04553  |
| OR1L1     | 9q33.2   | -0.173846382 | 0.019946 | 0.045551 |
| TMEM234   | 1p35.2   | 0.173837173  | 0.019953 | 0.045561 |
| DEPDC4    | 12q23.1  | -0.173832988 | 0.019956 | 0.045563 |
| TOPAZ1    | 3p21.31  | -0.173829476 | 0.019958 | 0.045563 |
| SLC25A19  | 17q25.1  | 0.173774402  | 0.019998 | 0.045649 |
| LHX5      | 12q24.13 | 0.173767741  | 0.020003 | 0.045655 |
| YIPF7     | 4p12     | -0.173704213 | 0.020049 | 0.045755 |
| CACTIN    | 19p13.3  | 0.173663507  | 0.020079 | 0.045816 |
| FGF23     | 12p13.32 | 0.173660889  | 0.020081 | 0.045816 |
| DCUN1D3   | 16p12.3  | -0.173644676 | 0.020092 | 0.045838 |
| RANBP1    | 22q11.21 | 0.173579813  | 0.02014  | 0.04594  |
| LOC100129 | 19q13.2  | -0.17357396  | 0.020144 | 0.045945 |
| RBM28     | 7q32.1   | -0.173544243 | 0.020165 | 0.045989 |
| LTBP4     | 19q13.2  | 0.173531689  | 0.020175 | 0.046005 |
| NAPG      | 18p11.22 | 0.173477287  | 0.020214 | 0.04609  |
| NRSN1     | 6p22.3   | -0.173469523 | 0.02022  | 0.046098 |
| OGFR      | 20q13.33 | 0.173454272  | 0.020231 | 0.046116 |
| SULF2     | 20q13.12 | 0.173452179  | 0.020233 | 0.046116 |
| PLSCR2    | 3q24     | -0.173408984 | 0.020264 | 0.046183 |
| TMEM127   | 2q11.2   | 0.173355931  | 0.020303 | 0.046266 |
| MOB2      | 11p15.5  | 0.173345469  | 0.020311 | 0.046279 |
| SYF2      | 1p36.11  | 0.173341284  | 0.020314 | 0.04628  |
| CMC4      | Xq28     | -0.173318268 | 0.020331 | 0.046314 |
| MAPK13    | 6p21.31  | 0.173305714  | 0.02034  | 0.046329 |
| SLC16A7   | 12q14.1  | -0.173274329 | 0.020363 | 0.046377 |
| HIST1H4J  | 6p22.1   | 0.173234574  | 0.020393 | 0.046438 |
| GABPB1    | 15q21.2  | -0.173230389 | 0.020396 | 0.04644  |
| RNF26     | 11q23.3  | 0.173226205  | 0.020399 | 0.046442 |
| GNMT      | 6p21.1   | -0.173219928 | 0.020403 | 0.046447 |
| HMGB1     | 13q12.3  | 0.173194819  | 0.020422 | 0.046484 |
| PSMA3     | 14q23.1  | 0.173167619  | 0.020442 | 0.046524 |
| DTL       | 1q32.3   | 0.17315088   | 0.020454 | 0.046547 |
| COPS5     | 8q13.1   | 0.173136233  | 0.020465 | 0.046566 |
| FN3KRP    | 17q25.3  | 0.173088109  | 0.020501 | 0.046642 |
| GATAD2B   | 1q21.3   | -0.173072507 | 0.020512 | 0.046663 |
| BMI1      | 10p12.2  | -0.173058816 | 0.020522 | 0.046681 |
| PRRC1     | 5q23.2   | -0.173029523 | 0.020544 | 0.046725 |
| ST3GAL4   | 11q24.2  | 0.172998138  | 0.020567 | 0.046772 |
| MYH3      | 17p13.1  | -0.172958383 | 0.020597 | 0.046834 |
| IGSF9B    | 11q25    | 0.172950014  | 0.020603 | 0.046843 |
| SLC25A6   | Xp22.33  | -0.172924905 | 0.020622 | 0.04688  |
| THUMPD3-A | 3p25.3   | 0.172916536  | 0.020628 | 0.046889 |
| ZNF555    | 19p13.3  | -0.172910259 | 0.020633 | 0.046894 |
| DARS      | 2q21.3   | 0.172885151  | 0.020652 | 0.046931 |
| CXORF38   | Xp11.4   | 0.172855948  | 0.020673 | 0.046972 |
| OR13J1    | 9p13.3   | 0.172854905  | 0.020674 | 0.046972 |
| ZBTB20    | 3q13.31  | -0.172824472 | 0.020697 | 0.047018 |
| GCC1      | 7q32.1   | -0.172818195 | 0.020701 | 0.047024 |
| SV2C      | 5q13.3   | -0.172777588 | 0.020732 | 0.047087 |

|          |           |              |          |          |
|----------|-----------|--------------|----------|----------|
| H2AFZ    | 4q23      | 0.172770071  | 0.020737 | 0.047094 |
| C10ORF25 | 10q11.21  | -0.172765886 | 0.020741 | 0.047096 |
| TEAD2    | 19q13.33  | -0.172759609 | 0.020745 | 0.047102 |
| SLAH2    | 3q25.1    | 0.17271567   | 0.020778 | 0.047171 |
| DRAM2    | 1p13.3    | 0.172627791  | 0.020844 | 0.047315 |
| ACOX2    | 3p14.3    | -0.172608959 | 0.020858 | 0.047342 |
| CARHSP1  | 16p13.2   | 0.172594313  | 0.020869 | 0.047361 |
| TAPBPL   | 12p13.31  | -0.172527358 | 0.02092  | 0.04747  |
| C2CD6    | 2q33.1    | -0.172521101 | 0.020924 | 0.047476 |
| ULK1     | 12q24.33  | -0.17249388  | 0.020945 | 0.047517 |
| PIP4K2A  | 10p12.2   | -0.172487603 | 0.02095  | 0.047522 |
| LY6G5C   | 6p21.33   | -0.172481326 | 0.020954 | 0.047526 |
| PIP4K2C  | 12q13.3   | 0.172479233  | 0.020956 | 0.047526 |
| BTBD17   | 17q25.1   | -0.172473476 | 0.02096  | 0.04753  |
| MRPS36   | 5q13.2    | 0.172426924  | 0.020995 | 0.047605 |
| NLRP11   | 19q13.42- | -0.172414675 | 0.021005 | 0.04762  |
| SLC1A1   | 9p24.2    | 0.172395539  | 0.021019 | 0.047648 |
| FAM174A  | 5q21.1    | -0.172382985 | 0.021029 | 0.047664 |
| WIZ      | 19p13.12  | 0.172374616  | 0.021035 | 0.047673 |
| MRPL53   | 2p13.1    | 0.172330676  | 0.021068 | 0.047743 |
| TLDC2    | 20q11.23  | 0.172295106  | 0.021095 | 0.047798 |
| FAM86B1  | 8p23.1    | 0.172276275  | 0.021109 | 0.047825 |
| ANKRD30A | 10p11.21  | -0.172271006 | 0.021113 | 0.047829 |
| OCRL     | Xq26.1    | -0.172242797 | 0.021135 | 0.047872 |
| VPS45    | 1q21.2    | 0.172228151  | 0.021146 | 0.047892 |
| FGFBP2   | 4p15.32   | -0.172196945 | 0.02117  | 0.04794  |
| SLC13A4  | 7q33      | 0.172170701  | 0.02119  | 0.04798  |
| PGA5     | 11q12.2   | -0.172125822 | 0.021224 | 0.048052 |
| KLHL23   | 2q31.1    | -0.172117256 | 0.021231 | 0.048052 |
| USP11    | Xp11.3    | -0.172117256 | 0.021231 | 0.048052 |
| OR2L2    | 1q44      | -0.172115511 | 0.021232 | 0.048052 |
| ZNF668   | 16p11.2   | 0.172113071  | 0.021234 | 0.048052 |
| ATP6V1A  | 3q13.31   | -0.172098424 | 0.021245 | 0.048072 |
| NSF      | 17q21.31  | -0.172067039 | 0.021269 | 0.048121 |
| MEF2B    | 19p13.11  | 0.172060762  | 0.021274 | 0.048126 |
| MCM5     | 22q12.3   | 0.1720503    | 0.021282 | 0.048139 |
| GALNT15  | 3p25.1    | -0.172046116 | 0.021285 | 0.048141 |
| OXSM     | 3p24.2    | 0.172037746  | 0.021291 | 0.04815  |
| APOC1    | 19q13.32  | 0.172006361  | 0.021315 | 0.048199 |
| XXYL1    | 3q29      | 0.17198753   | 0.02133  | 0.048226 |
| SGSH     | 17q25.3   | -0.171949867 | 0.021359 | 0.048286 |
| BTN2A2   | 6p22.2    | -0.171910112 | 0.021389 | 0.048349 |
| IBSP     | 4q22.1    | 0.1718733    | 0.021417 | 0.048408 |
| DIRAS2   | 9q22.2    | -0.171841065 | 0.021442 | 0.048458 |
| VPS37A   | 8p22      | -0.171790848 | 0.021481 | 0.04854  |
| COX17    | 3q13.33   | 0.171774109  | 0.021494 | 0.048564 |
| LRRC34   | 3q26.2    | -0.171761555 | 0.021503 | 0.04858  |
| MINDY3   | 10p13     | -0.171742724 | 0.021518 | 0.048608 |
| PSKH2    | 8q21.3    | 0.171708785  | 0.021544 | 0.048661 |
| PHF21B   | 22q13.31  | -0.171667103 | 0.021576 | 0.048729 |
| TMEM39A  | 3q13.33   | -0.171648568 | 0.021591 | 0.048755 |
| CTSL     | 9q21.33   | -0.17162346  | 0.02161  | 0.048794 |
| BMF      | 15q15.1   | -0.171617182 | 0.021615 | 0.048799 |
| AOC2     | 17q21.31  | -0.171610905 | 0.02162  | 0.048805 |

|            |           |               |           |           |
|------------|-----------|---------------|-----------|-----------|
| PRLHR      | 10q26. 11 | -0. 171598654 | 0. 021629 | 0. 048821 |
| UBOX5      | 20p13     | -0. 171564874 | 0. 021656 | 0. 048874 |
| THEM5      | 1q21. 3   | -0. 17155046  | 0. 021667 | 0. 048893 |
| TIGAR      | 12p13. 32 | -0. 171548135 | 0. 021669 | 0. 048893 |
| GABRQ      | Xq28      | -0. 171540298 | 0. 021675 | 0. 048901 |
| VWAS       | 13q14. 11 | -0. 171527211 | 0. 021685 | 0. 048918 |
| NDUFAF6    | 8q22. 1   | -0. 171516749 | 0. 021693 | 0. 048931 |
| IYD        | 6q25. 1   | 0. 171506646  | 0. 021701 | 0. 048943 |
| ACO1       | 9p21. 1   | -0. 171476995 | 0. 021724 | 0. 048988 |
| CLSTN1     | 1p36. 22  | 0. 171474902  | 0. 021726 | 0. 048988 |
| CXORF21    | Xp21. 2   | -0. 171454068 | 0. 021742 | 0. 049017 |
| NDUFV1     | 11q13. 2  | 0. 171451886  | 0. 021744 | 0. 049017 |
| CTXN3      | 5q23. 2   | -0. 171441711 | 0. 021751 | 0. 04903  |
| NUTM2A     | 10q23. 2  | -0. 171405854 | 0. 021779 | 0. 049085 |
| SEC24A     | 5q31. 1   | -0. 171403762 | 0. 021781 | 0. 049085 |
| POMK       | 8p11. 21  | -0. 171379012 | 0. 0218   | 0. 049123 |
| SNX14      | 6q14. 3   | -0. 171374469 | 0. 021804 | 0. 049126 |
| FRMD4B     | 3p14. 1   | 0. 171345176  | 0. 021827 | 0. 049172 |
| PANK2      | 20p13     | -0. 171315883 | 0. 02185  | 0. 049218 |
| LRRC27     | 10q26. 3  | -0. 171292867 | 0. 021868 | 0. 049253 |
| LINGO3     | 19p13. 3  | -0. 171272402 | 0. 021884 | 0. 049283 |
| SH2D1A     | Xq25      | -0. 17126184  | 0. 021892 | 0. 049296 |
| BBS4       | 15q24. 1  | -0. 171240558 | 0. 021909 | 0. 049328 |
| IGFN1      | 1q32. 1   | -0. 171205819 | 0. 021936 | 0. 049384 |
| LINC00599  | 8p23. 1   | -0. 17118832  | 0. 02195  | 0. 04941  |
| LINC00908  | 18q23     | -0. 171171869 | 0. 021963 | 0. 049433 |
| TMED3      | 15q25. 1  | 0. 171146402  | 0. 021983 | 0. 049473 |
| PRG4       | 1q31. 1   | -0. 17113594  | 0. 021991 | 0. 049486 |
| HSPBAP1    | 3q21. 1   | 0. 171112924  | 0. 022009 | 0. 049521 |
| UCMA       | 10p13     | -0. 171082191 | 0. 022033 | 0. 04957  |
| WDR82      | 3p21. 2   | -0. 1710376   | 0. 022068 | 0. 049641 |
| CD8A       | 2p11. 2   | -0. 171035507 | 0. 02207  | 0. 049641 |
| KLRB1      | 12p13. 31 | -0. 171018768 | 0. 022083 | 0. 049665 |
| FOXF2      | 6p25. 3   | 0. 170981106  | 0. 022113 | 0. 049727 |
| NLGN4Y     | Yq11. 221 | -0. 170975208 | 0. 022118 | 0. 04973  |
| CSGALNACT1 | 10q11. 21 | -0. 170972737 | 0. 02212  | 0. 04973  |
| NFRKB      | 11q24. 3  | 0. 17096646   | 0. 022124 | 0. 049736 |
| PCP4       | 21q22. 2  | -0. 170929691 | 0. 022154 | 0. 049796 |
| WIPF1      | 2q31. 1   | -0. 170909966 | 0. 022169 | 0. 049825 |
| ACAP2      | 3q29      | -0. 170874396 | 0. 022197 | 0. 049883 |
| DDHD2      | 8p11. 23  | -0. 170868119 | 0. 022202 | 0. 049889 |
| NUP188     | 9q34. 11  | -0. 17085138  | 0. 022216 | 0. 049913 |
| ANKRD27    | 19q13. 11 | 0. 170845103  | 0. 022221 | 0. 049918 |
| NELL1      | 11p15. 1  | -0. 170841777 | 0. 022223 | 0. 049919 |
| ATP10B     | 5q34      | 0. 170817992  | 0. 022242 | 0. 049955 |
| MRPL12     | 17q25. 3  | 0. 17080744   | 0. 022251 | 0. 049969 |
| HSPA7      | 1q23. 3   | 0. 170799071  | 0. 022257 | 0. 049978 |
| CUL2       | 10p11. 21 | -0. 170769778 | 0. 02228  | 0. 050025 |
| DYNC1H1    | 14q32. 31 | -0. 170759316 | 0. 022289 | 0. 050038 |
| ANKRD33    | 12q13. 13 | 0. 170752198  | 0. 022294 | 0. 050045 |
| SNRPC      | 6p21. 31  | 0. 170721654  | 0. 022319 | 0. 050092 |
| TCAF2      | 7q35      | -0. 170719561 | 0. 02232  | 0. 050092 |
| TAS2R50    | 12p13. 2  | -0. 170710202 | 0. 022328 | 0. 050103 |
| SPATA48    | 7p12. 2   | -0. 170697389 | 0. 022338 | 0. 05012  |

|            |           |               |           |           |
|------------|-----------|---------------|-----------|-----------|
| NOL4L      | 20q11. 21 | 0. 170683991  | 0. 022349 | 0. 050139 |
| PELI3      | 11q13. 2  | -0. 17066516  | 0. 022364 | 0. 050167 |
| SCN9A      | 2q24. 3   | -0. 170658883 | 0. 022369 | 0. 050172 |
| CDKN1A     | 6p21. 2   | 0. 170648421  | 0. 022377 | 0. 05018  |
| MAGEL2     | 15q11. 2  | -0. 170648421 | 0. 022377 | 0. 05018  |
| OPN3       | 1q43      | 0. 170633775  | 0. 022389 | 0. 050195 |
| PHF13      | 1p36. 31  | 0. 170633775  | 0. 022389 | 0. 050195 |
| SINHCAF    | 12p11. 21 | 0. 170550081  | 0. 022456 | 0. 050339 |
| C2CD4B     | 15q22. 2  | -0. 170531249 | 0. 022471 | 0. 050364 |
| ICOS       | 2q33. 2   | -0. 170527957 | 0. 022474 | 0. 050364 |
| CPT2       | 1p32. 3   | -0. 170527065 | 0. 022474 | 0. 050364 |
| APP        | 21q21. 3  | -0. 170462202 | 0. 022526 | 0. 050475 |
| XRN1       | 3q23      | -0. 170455925 | 0. 022531 | 0. 05048  |
| HRAS       | 11p15. 5  | 0. 170430816  | 0. 022552 | 0. 05052  |
| MIB1       | 18q11. 2  | -0. 170420354 | 0. 02256  | 0. 050533 |
| CLPX       | 15q22. 31 | -0. 17041617  | 0. 022563 | 0. 050535 |
| HEXB       | 5q13. 3   | -0. 170405708 | 0. 022572 | 0. 050548 |
| GPR171     | 3q25. 1   | -0. 170383827 | 0. 022589 | 0. 050582 |
| NTM        | 11q25     | 0. 1703806    | 0. 022592 | 0. 050582 |
| ZNF227     | 19q13. 31 | -0. 170365953 | 0. 022604 | 0. 050603 |
| RPS10P7    | 1q32. 1   | -0. 170332475 | 0. 022631 | 0. 050657 |
| THRAP3     | 1p34. 3   | -0. 170315737 | 0. 022644 | 0. 050682 |
| MFSD4A-AS1 | 1q32. 1   | 0. 170269394  | 0. 022682 | 0. 05076  |
| RTEL1      | 20q13. 33 | 0. 170248781  | 0. 022698 | 0. 050792 |
| HSD17B7    | 1q23. 3   | 0. 170215303  | 0. 022725 | 0. 050846 |
| MS4A6A     | 11q12. 2  | -0. 170206934 | 0. 022732 | 0. 050856 |
| DGKK       | Xp11. 22  | -0. 170200575 | 0. 022737 | 0. 05086  |
| GOLGA7     | 8p11. 21  | -0. 170198565 | 0. 022739 | 0. 05086  |
| YPEL3      | 16p11. 2  | 0. 170175549  | 0. 022758 | 0. 050896 |
| C1QL1      | 17q21. 31 | -0. 170137886 | 0. 022788 | 0. 050958 |
| CREB3L4    | 1q21. 3   | 0. 170068839  | 0. 022844 | 0. 051078 |
| FOXA3      | 19q13. 32 | 0. 170022807  | 0. 022882 | 0. 051156 |
| BMP10      | 2p13. 3   | -0. 170014435 | 0. 022888 | 0. 051165 |
| INPP5A     | 10q26. 3  | 0. 17000816   | 0. 022893 | 0. 051171 |
| ITIH2      | 10p14     | 0. 16998483   | 0. 022912 | 0. 051208 |
| CAMK2B     | 7p13      | -0. 169954894 | 0. 022937 | 0. 051257 |
| ADGRG7     | 3q12. 2   | 0. 169910789  | 0. 022973 | 0. 051331 |
| SHOC2      | 10q25. 2  | -0. 169886804 | 0. 022992 | 0. 051369 |
| ZBTB26     | 9q33. 2   | -0. 169878434 | 0. 022999 | 0. 051379 |
| PLA2G4E    | 15q15. 1  | 0. 169871175  | 0. 023005 | 0. 051386 |
| SAT1       | Xp22. 11  | 0. 169861695  | 0. 023013 | 0. 051398 |
| KRTAP5-1   | 11p15. 5  | 0. 169842864  | 0. 023028 | 0. 051427 |
| TMC01      | 1q24. 1   | 0. 169828218  | 0. 02304  | 0. 051448 |
| CLDN12     | 7q21. 13  | 0. 16982194   | 0. 023046 | 0. 051452 |
| VIRMA      | 8q22. 1   | -0. 169819848 | 0. 023047 | 0. 051452 |
| ADA        | 20q13. 12 | 0. 169775909  | 0. 023083 | 0. 051526 |
| CHRM2      | 7q33      | -0. 169748344 | 0. 023106 | 0. 051571 |
| EMX2       | 10q26. 11 | 0. 169743854  | 0. 02311  | 0. 051573 |
| PLP1       | Xq22. 2   | -0. 169703031 | 0. 023143 | 0. 051642 |
| RPS3       | 11q13. 4  | 0. 169681753  | 0. 023161 | 0. 051676 |
| PHACTR2    | 6q24. 2   | -0. 169667195 | 0. 023173 | 0. 051697 |
| ITPK1-AS1  | 11q32. 12 | 0. 169662547  | 0. 023176 | 0. 051699 |
| UNC5D      | 8p12      | -0. 169638669 | 0. 023196 | 0. 051738 |
| EMG1       | 12p13. 31 | 0. 169631536  | 0. 023202 | 0. 051745 |

|          |          |              |          |          |
|----------|----------|--------------|----------|----------|
| RPS6KB2  | 11q13.2  | 0.169627351  | 0.023205 | 0.051747 |
| PRR12    | 19q13.33 | 0.169623167  | 0.023209 | 0.051749 |
| VEGFA    | 6p21.1   | 0.169604335  | 0.023224 | 0.051778 |
| GTF2I    | 7q11.23  | -0.169598058 | 0.02323  | 0.051783 |
| DENND3   | 8q24.3   | 0.169549934  | 0.023269 | 0.051866 |
| THAP6    | 4q21.1   | -0.169522733 | 0.023292 | 0.05191  |
| THBS4    | 5q14.1   | -0.169516456 | 0.023297 | 0.051911 |
| TRPM5    | 11p15.5  | 0.169516137  | 0.023297 | 0.051911 |
| COG6     | 13q14.11 | -0.169455778 | 0.023347 | 0.052016 |
| CASK     | Xp11.4   | 0.169449501  | 0.023352 | 0.052022 |
| SMIM29   | 6p21.31  | 0.169434854  | 0.023364 | 0.052043 |
| CCN2     | 6q23.2   | -0.169418116 | 0.023378 | 0.052067 |
| CCDC174  | 3p25.1   | 0.169416023  | 0.02338  | 0.052067 |
| SHLD2P1  | 10q11.22 | -0.169403469 | 0.02339  | 0.052084 |
| ADGRE2   | 19p13.12 | -0.169300944 | 0.023476 | 0.052268 |
| WDR47    | 1p13.3   | -0.169296759 | 0.023479 | 0.05227  |
| EVA1C    | 21q22.11 | 0.169290482  | 0.023484 | 0.052276 |
| PIK3R5   | 17p13.1  | -0.169257004 | 0.023512 | 0.052332 |
| PRSS30P  | 16p13.3  | 0.169252819  | 0.023516 | 0.052334 |
| MAP2K2   | 19p13.3  | 0.169242358  | 0.023524 | 0.052347 |
| IFNLR1   | 1p36.11  | -0.169167033 | 0.023587 | 0.052481 |
| UTP11    | 1p34.3   | -0.169160756 | 0.023593 | 0.052487 |
| VWCE     | 11q12.2  | -0.16912937  | 0.023619 | 0.05254  |
| RITA1    | 12q24.13 | -0.169079242 | 0.023661 | 0.052627 |
| EXOC6    | 10q23.33 | -0.169041491 | 0.023692 | 0.052692 |
| TMEM258  | 11q12.2  | 0.16903103   | 0.023701 | 0.052705 |
| ULBP2    | 6q25.1   | 0.169003829  | 0.023724 | 0.05275  |
| ZNF567   | 19q13.12 | -0.168982905 | 0.023742 | 0.052783 |
| PVRIG    | 7q22.1   | -0.168970351 | 0.023752 | 0.052801 |
| TIMP1    | Xp11.3   | 0.168966167  | 0.023756 | 0.052803 |
| REXO1    | 19p13.3  | 0.168953612  | 0.023766 | 0.05282  |
| PPIAL4D  | 1q21.1   | -0.168950908 | 0.023768 | 0.05282  |
| BRWD1    | 21q22.2  | -0.168943151 | 0.023775 | 0.052826 |
| MFSD8    | 4q28.2   | -0.168941058 | 0.023777 | 0.052826 |
| CDH16    | 16q22.1  | 0.168827706  | 0.023872 | 0.053033 |
| GRM6     | 5q35.3   | -0.168813513 | 0.023884 | 0.053053 |
| RAD21    | 8q24.11  | -0.168805055 | 0.023891 | 0.053063 |
| SDHC     | 1q23.3   | 0.168775762  | 0.023916 | 0.053113 |
| NUDT14   | 14q32.33 | 0.168742284  | 0.023945 | 0.05317  |
| NDUFC2   | 11q14.1  | 0.1687381    | 0.023948 | 0.053171 |
| SCNN1B   | 16p12.2  | -0.168720403 | 0.023963 | 0.053199 |
| HCN3     | 1q22     | 0.168681606  | 0.023996 | 0.05326  |
| STT3B    | 3p23     | -0.168681606 | 0.023996 | 0.05326  |
| TIRAP    | 11q24.2  | -0.168675329 | 0.024001 | 0.053264 |
| SLC7A5P2 | 16p12.2  | 0.168673073  | 0.024003 | 0.053264 |
| ITGB1BP2 | Xq13.1   | 0.168654494  | 0.024019 | 0.053293 |
| RWDD1    | 6q22.1   | -0.168606281 | 0.02406  | 0.053378 |
| CCL21    | 9p13.3   | -0.168602097 | 0.024063 | 0.05338  |
| PRR3     | 6p21.33  | -0.168572804 | 0.024088 | 0.05343  |
| SPATA1   | 1p22.3   | -0.168555736 | 0.024103 | 0.053456 |
| RUNDC3A  | 17q21.31 | -0.168541418 | 0.024115 | 0.053475 |
| HS6ST1   | 2q14.3   | -0.168539326 | 0.024117 | 0.053475 |
| ABCC11   | 16q12.1  | 0.168533995  | 0.024121 | 0.053479 |
| NDRG4    | 16q21    | -0.168530956 | 0.024124 | 0.053479 |

|           |            |               |           |           |
|-----------|------------|---------------|-----------|-----------|
| GPR153    | 1p36. 31   | 0. 168497479  | 0. 024152 | 0. 053536 |
| NID2      | 14q22. 1   | -0. 168489109 | 0. 02416  | 0. 053546 |
| GJB7      | 6q14. 3-q1 | -0. 168466704 | 0. 024179 | 0. 053583 |
| FBXL2     | 3p22. 3    | 0. 168426339  | 0. 024213 | 0. 053653 |
| CYTH4     | 22q13. 1   | -0. 168420062 | 0. 024219 | 0. 053656 |
| ALLC      | 2p25. 3    | -0. 168418689 | 0. 02422  | 0. 053656 |
| LGALS7B   | 19q13. 2   | 0. 168407799  | 0. 024229 | 0. 05367  |
| BDKRB2    | 14q32. 2   | -0. 168371937 | 0. 02426  | 0. 053732 |
| ZNF486    | 19p12      | -0. 168359383 | 0. 02427  | 0. 05375  |
| SERF1A    | 5q13. 2    | -0. 168346829 | 0. 024281 | 0. 053768 |
| PI4KB     | 1q21. 3    | -0. 168340552 | 0. 024287 | 0. 053774 |
| SHLD2     | 10q23. 2   | -0. 168317536 | 0. 024306 | 0. 053812 |
| ZNF589    | 3p21. 31   | -0. 168313351 | 0. 02431  | 0. 053814 |
| RBM41     | Xq22. 3    | 0. 168298705  | 0. 024323 | 0. 053835 |
| TSHZ3     | 19q12      | -0. 16829452  | 0. 024326 | 0. 053837 |
| NUDC      | 1p36. 11   | 0. 168277781  | 0. 02434  | 0. 053863 |
| CXCL3     | 4q13. 3    | 0. 168264269  | 0. 024352 | 0. 053883 |
| SAMD14    | 17q21. 33  | 0. 168244304  | 0. 024369 | 0. 053915 |
| C12ORF49  | 12q24. 22  | -0. 16822338  | 0. 024387 | 0. 053949 |
| TEKT3     | 17p12      | -0. 168219195 | 0. 024391 | 0. 053951 |
| CHRM5     | 15q14      | -0. 1682023   | 0. 024405 | 0. 053977 |
| TLE5      | 19p13. 3   | 0. 168189902  | 0. 024416 | 0. 053995 |
| ERP29     | 12q24. 13  | -0. 168179441 | 0. 024425 | 0. 054008 |
| UBE2S     | 19q13. 42  | 0. 168164794  | 0. 024438 | 0. 05403  |
| GALNT1    | 18q12. 2   | -0. 168154332 | 0. 024447 | 0. 054044 |
| KANSL3    | 2q11. 2    | -0. 168148055 | 0. 024452 | 0. 05405  |
| PARS2     | 1p32. 3    | -0. 168122947 | 0. 024474 | 0. 054092 |
| CR1       | 1q32. 2    | -0. 168114577 | 0. 024481 | 0. 054102 |
| SNF8      | 17q21. 32  | 0. 168097839  | 0. 024495 | 0. 054128 |
| EXOSC10   | 1p36. 22   | 0. 168091562  | 0. 024501 | 0. 054134 |
| WDR75     | 2q32. 2    | 0. 168079007  | 0. 024512 | 0. 054148 |
| OCLM      | 1q31. 1    | 0. 168078215  | 0. 024512 | 0. 054148 |
| TMEM179   | 14q32. 33  | -0. 168060815 | 0. 024527 | 0. 054175 |
| BMP2      | 20p12. 3   | 0. 168053899  | 0. 024533 | 0. 054182 |
| OLFM3     | 1p21. 1    | -0. 168050211 | 0. 024536 | 0. 054183 |
| ZNF761    | 19q13. 42  | -0. 168028791 | 0. 024555 | 0. 054218 |
| LRRC8C    | 1p22. 2    | -0. 168016237 | 0. 024566 | 0. 054236 |
| DPH6      | 15q14      | 0. 168007867  | 0. 024573 | 0. 054246 |
| EPS15     | 1p32. 3    | -0. 167968112 | 0. 024608 | 0. 054316 |
| KLHL4     | Xq21. 31   | -0. 167957651 | 0. 024617 | 0. 05433  |
| FAM200B   | 4p15. 32   | -0. 167945097 | 0. 024627 | 0. 054348 |
| SCLT1     | 4q28. 2    | -0. 167915804 | 0. 024653 | 0. 054396 |
| MTLN      | 2q13       | 0. 167913711  | 0. 024655 | 0. 054396 |
| SKAP2     | 7p15. 2    | 0. 167907434  | 0. 02466  | 0. 054402 |
| DDIT3     | 12q13. 3   | 0. 167853033  | 0. 024707 | 0. 0545   |
| LINC00115 | 1p36. 33   | 0. 167840479  | 0. 024718 | 0. 054518 |
| PSMC1     | 14q32. 11  | 0. 167821648  | 0. 024735 | 0. 054548 |
| EIF3F     | 11p15. 4   | 0. 167817463  | 0. 024738 | 0. 054549 |
| TFPI      | 2q32. 1    | 0. 16781537   | 0. 02474  | 0. 054549 |
| KRTAP5-1C | 11q13. 4   | 0. 167732718  | 0. 024812 | 0. 054693 |
| TTY6B     | Yq11. 223  | -0. 167732395 | 0. 024813 | 0. 054693 |
| ROPN1B    | 3q21. 2    | 0. 167728258  | 0. 024816 | 0. 054693 |
| C9ORF85   | 9q21. 13   | -0. 167727491 | 0. 024817 | 0. 054693 |
| IL11RA    | 9p13. 3    | -0. 167723307 | 0. 02482  | 0. 054695 |



|                   |              |          |          |
|-------------------|--------------|----------|----------|
| LINC004712q37.1   | -0.167712683 | 0.02483  | 0.05471  |
| KRT3 12q13.13     | 0.167697413  | 0.024843 | 0.054733 |
| ELOF1 19p13.2     | 0.167666813  | 0.02487  | 0.054774 |
| IGSF21 1p36.13    | -0.167666813 | 0.02487  | 0.054774 |
| DRC7 16q21        | -0.167664784 | 0.024872 | 0.054774 |
| XAGE5 Xp11.22     | -0.16766344  | 0.024873 | 0.054774 |
| BCL7B 7q11.23     | 0.167656351  | 0.024879 | 0.054782 |
| PCDHGB1 5q31.3    | -0.16764589  | 0.024888 | 0.054796 |
| TMEM250 9q34.3    | 0.167627058  | 0.024905 | 0.054826 |
| PAN2 12q13.3      | -0.167585211 | 0.024941 | 0.054901 |
| YIPF4 2p22.3      | 0.167574749  | 0.02495  | 0.054915 |
| FIP1L1 4q12       | 0.167501517  | 0.025015 | 0.055051 |
| REST 4q12         | -0.167482686 | 0.025031 | 0.055081 |
| NCKAP1L 12q13.13- | -0.167463855 | 0.025048 | 0.055111 |
| FAM151B 5q14.1    | -0.167434562 | 0.025074 | 0.055162 |
| VTA1 6q24.1-q2    | -0.1674241   | 0.025083 | 0.055176 |
| OR6T1 11q24.1     | -0.167376472 | 0.025125 | 0.055262 |
| C19ORF48 19q13.33 | 0.167313205  | 0.025181 | 0.055379 |
| MPV17L2 19p13.11  | 0.167290189  | 0.025201 | 0.055418 |
| GPRC5C 17q25.1    | 0.167275542  | 0.025214 | 0.05544  |
| LPAL2 6q25.3      | -0.167251572 | 0.025235 | 0.055481 |
| SNHG1 11q12.3     | 0.167191848  | 0.025288 | 0.055591 |
| ASB1 2q37.3       | -0.167185571 | 0.025294 | 0.055597 |
| TESPA1 12q13.2    | -0.167179294 | 0.025299 | 0.055603 |
| SNORA32 11q21     | 0.16717059   | 0.025307 | 0.055614 |
| CBR3 21q22.12     | 0.167126985  | 0.025346 | 0.055693 |
| ZNF490 19p13.2-F  | -0.167116523 | 0.025355 | 0.055707 |
| WDR830S 19p13.13  | 0.167110246  | 0.025361 | 0.055714 |
| LAMC1 1q25.3      | -0.167106062 | 0.025364 | 0.055716 |
| LIPG 18q21.1      | -0.167093507 | 0.025375 | 0.055734 |
| SLC12A4 16q22.1   | 0.167049568  | 0.025415 | 0.055814 |
| MXRA5 Xp22.33     | 0.167028644  | 0.025433 | 0.055849 |
| ZPBP 7p12.2       | -0.166935384 | 0.025516 | 0.056025 |
| PRKRA 2q31.2      | 0.16690938   | 0.02554  | 0.056068 |
| TEAD1 11p15.3     | -0.166907288 | 0.025542 | 0.056068 |
| ANKHD1 5q31.3     | -0.166894734 | 0.025553 | 0.056084 |
| ATF7IP2 16p13.2-F | 0.166892728  | 0.025555 | 0.056084 |
| BBX 3q13.12       | -0.166869625 | 0.025575 | 0.05612  |
| BTNL3 5q35.3      | 0.166868283  | 0.025577 | 0.05612  |
| SPON1 11p15.2     | -0.166854979 | 0.025588 | 0.05614  |
| COL8A2 1p34.3     | 0.166840332  | 0.025602 | 0.056163 |
| DENND4B 1q21.3    | -0.16682987  | 0.025611 | 0.056177 |
| C2CD4A 15q22.2    | -0.166804762 | 0.025633 | 0.05622  |
| KATNBL1 15q14     | 0.166739899  | 0.025692 | 0.056336 |
| ZC3H13 13q14.13   | -0.166739899 | 0.025692 | 0.056336 |
| ABCF2 7q36.1      | -0.166725253 | 0.025705 | 0.056359 |
| NPPB 1p36.22      | -0.166704854 | 0.025723 | 0.056393 |
| DISP3 1p36.22     | -0.166684888 | 0.025741 | 0.056426 |
| SCIMP 17p13.2     | -0.166622727 | 0.025797 | 0.056542 |
| TDGF1 3p21.31     | -0.166595177 | 0.025822 | 0.056591 |
| UBR1 15q15.2      | -0.166585065 | 0.025831 | 0.056605 |
| RAPGEF5 7p15.3    | -0.166578788 | 0.025837 | 0.056611 |
| ZNF124 1q44       | -0.166570418 | 0.025845 | 0.056621 |
| INSL3 19p13.11    | 0.16654531   | 0.025867 | 0.056665 |

|          |           |               |           |           |
|----------|-----------|---------------|-----------|-----------|
| DEF6     | 6p21. 31  | 0. 166478355  | 0. 025928 | 0. 056791 |
| SLC22A5  | 5q31. 1   | -0. 166444877 | 0. 025958 | 0. 056851 |
| SLC9A3   | 5p15. 33  | 0. 166427179  | 0. 025974 | 0. 05688  |
| PASD1    | Xq28      | -0. 166411582 | 0. 025988 | 0. 056905 |
| GRAPL    | 17p11. 2  | -0. 166341999 | 0. 026052 | 0. 057037 |
| ADAMDEC1 | 8p21. 2   | -0. 166337208 | 0. 026056 | 0. 057041 |
| SEPSECS  | 4p15. 2   | -0. 16632352  | 0. 026068 | 0. 057062 |
| HHEX     | 10q23. 33 | -0. 166319335 | 0. 026072 | 0. 057064 |
| PGRMC2   | 4q28. 2   | -0. 166310966 | 0. 02608  | 0. 057072 |
| CTAGE10P | 13q14. 2  | -0. 166308961 | 0. 026082 | 0. 057072 |
| KRT33B   | 17q21. 2  | 0. 166297022  | 0. 026093 | 0. 05709  |
| OTOR     | 20p12. 1  | 0. 166293082  | 0. 026096 | 0. 057091 |
| SKA1     | 18q21. 1  | 0. 166283765  | 0. 026105 | 0. 057101 |
| NAT9     | 17q25. 1  | 0. 166281673  | 0. 026107 | 0. 057101 |
| ZFP42    | 4q35. 2   | -0. 166251724 | 0. 026134 | 0. 057155 |
| CRYBG3   | 3q11. 2   | -0. 166200071 | 0. 026181 | 0. 057252 |
| VSTM4    | 10q11. 23 | -0. 166185425 | 0. 026194 | 0. 057269 |
| MORC2    | 22q12. 2  | 0. 166183332  | 0. 026196 | 0. 057269 |
| CASKIN2  | 17q25. 1  | -0. 16618124  | 0. 026198 | 0. 057269 |
| UBTF     | 17q21. 31 | -0. 166179148 | 0. 0262   | 0. 057269 |
| POU2F2   | 19q13. 2  | -0. 166151947 | 0. 026225 | 0. 057317 |
| NAT16    | 7q22. 1   | -0. 166066655 | 0. 026303 | 0. 057481 |
| FAM166B  | 9p13. 3   | -0. 166012437 | 0. 026353 | 0. 057583 |
| MBTD1    | 17q21. 33 | -0. 166009667 | 0. 026356 | 0. 057583 |
| CCDC89   | 11q14. 1  | -0. 165992928 | 0. 026371 | 0. 057606 |
| TMC05A   | 15q14     | 0. 165989352  | 0. 026374 | 0. 057606 |
| GEM      | 8q22. 1   | -0. 165988743 | 0. 026375 | 0. 057606 |
| GINS1    | 20p11. 21 | 0. 165972004  | 0. 02639  | 0. 057633 |
| CPNE4    | 3q22. 1   | -0. 16596772  | 0. 026394 | 0. 057636 |
| LMNTD1   | 12p12. 1  | -0. 165950883 | 0. 02641  | 0. 057663 |
| UGT2B4   | 4q13. 3   | -0. 165943158 | 0. 026417 | 0. 057673 |
| PARVB    | 22q13. 31 | -0. 165930157 | 0. 026429 | 0. 057689 |
| PMP2     | 8q21. 13  | -0. 16592851  | 0. 02643  | 0. 057689 |
| PIK3CG   | 7q22. 3   | -0. 165905049 | 0. 026452 | 0. 05773  |
| HTR7     | 10q23. 31 | -0. 165894934 | 0. 026461 | 0. 057741 |
| LCN8     | 9q34. 3   | -0. 165892785 | 0. 026463 | 0. 057741 |
| ICK      | 6p12. 1   | -0. 16588831  | 0. 026467 | 0. 057741 |
| VCP      | 9p13. 3   | -0. 165886218 | 0. 026469 | 0. 057741 |
| MRM1     | 17q12     | 0. 165884125  | 0. 026471 | 0. 057741 |
| RPUSD4   | 11q24. 2  | 0. 165865294  | 0. 026489 | 0. 057772 |
| NDUFV2   | 18p11. 22 | 0. 165846463  | 0. 026506 | 0. 057804 |
| CCDC197  | 14q32. 12 | -0. 165843533 | 0. 026509 | 0. 057804 |
| HTR3E    | 3q27. 1   | 0. 16583509   | 0. 026516 | 0. 057814 |
| WWTR1    | 3q25. 1   | -0. 165829724 | 0. 026521 | 0. 057819 |
| STEAP1   | 7q21. 13  | 0. 165823447  | 0. 026527 | 0. 057825 |
| ICA1     | 7p21. 3   | 0. 1658088    | 0. 026541 | 0. 057844 |
| ARL4C    | 2q37. 1   | 0. 165804616  | 0. 026545 | 0. 057844 |
| SSR4P1   | 21q22. 3  | -0. 165804616 | 0. 026545 | 0. 057844 |
| ABHD10   | 3q13. 2   | -0. 165798339 | 0. 02655  | 0. 057851 |
| RNF208   | 9q34. 3   | 0. 165792062  | 0. 026556 | 0. 057857 |
| PDCD2    | 6q27      | -0. 165683259 | 0. 026657 | 0. 05807  |
| TMED9    | 5q35. 3   | 0. 165649781  | 0. 026688 | 0. 058132 |
| ZNF300   | 5q33. 1   | 0. 165591195  | 0. 026743 | 0. 058244 |
| ZBTB41   | 1q31. 3   | -0. 16552424  | 0. 026805 | 0. 058373 |

|           |          |              |          |          |
|-----------|----------|--------------|----------|----------|
| MKNK1     | 1p33     | -0.165511686 | 0.026817 | 0.058393 |
| GFER      | 16p13.3  | 0.165494947  | 0.026832 | 0.05842  |
| TMEM182   | 2q12.1   | 0.165451007  | 0.026873 | 0.058503 |
| RFLNB     | 17p13.3  | -0.16544473  | 0.026879 | 0.05851  |
| DDX12P    | 12p13.31 | 0.165432176  | 0.026891 | 0.058529 |
| GSC       | 14q32.13 | 0.165415437  | 0.026907 | 0.058556 |
| GAD2      | 10p12.1  | -0.165405087 | 0.026916 | 0.058571 |
| EYA3      | 1p35.3   | -0.165361036 | 0.026958 | 0.058654 |
| DHX8      | 17q21.31 | 0.165352667  | 0.026965 | 0.058661 |
| RAB13     | 1q21.3   | 0.165348482  | 0.026969 | 0.058661 |
| SRGAP1    | 12q14.2  | -0.165348482 | 0.026969 | 0.058661 |
| GALNTL6   | 4q34.1   | -0.165342904 | 0.026975 | 0.058666 |
| RESF1     | 12p11.21 | 0.165298265  | 0.027016 | 0.058751 |
| PSMA2     | 7p14.1   | 0.165252234  | 0.02706  | 0.058838 |
| ATP6V1D   | 14q23.3  | 0.165225033  | 0.027085 | 0.058887 |
| SLC4A1    | 17q21.31 | -0.165190319 | 0.027118 | 0.058952 |
| TMEM161A  | 19p13.11 | 0.165162262  | 0.027144 | 0.058997 |
| ZNF264    | 19q13.43 | -0.165162262 | 0.027144 | 0.058997 |
| CADM4     | 19q13.31 | -0.165153893 | 0.027152 | 0.059007 |
| TMED7     | 5q22.3   | -0.165135062 | 0.02717  | 0.05904  |
| TJP1      | 15q13.1  | 0.165128785  | 0.027176 | 0.059046 |
| SNORA24   | 4q26     | 0.165120875  | 0.027183 | 0.059053 |
| CHD7      | 8q12.2   | -0.165118323 | 0.027186 | 0.059053 |
| CSNK2A3   | 11p15.4  | -0.16511623  | 0.027188 | 0.059053 |
| C3ORF14   | 3p14.2   | -0.165093214 | 0.027209 | 0.059093 |
| TMEM8B    | 9p13.3   | -0.165074383 | 0.027227 | 0.059119 |
| FPR1      | 19q13.41 | -0.165074383 | 0.027227 | 0.059119 |
| PRDM10    | 11q24.3  | -0.165057644 | 0.027243 | 0.059147 |
| SLC35F6   | 2p23.3   | 0.165032536  | 0.027267 | 0.059192 |
| RBM15B    | 3p21.2   | -0.165003243 | 0.027295 | 0.059246 |
| PEBP4     | 8p21.3   | -0.164988115 | 0.027309 | 0.059271 |
| RABEP2    | 16p11.2  | 0.164953027  | 0.027342 | 0.059334 |
| ISCA2     | 14q24.3  | 0.164950934  | 0.027344 | 0.059334 |
| CD1D      | 1q23.1   | -0.164944657 | 0.02735  | 0.059341 |
| ZNF717    | 3p12.3   | -0.164936374 | 0.027358 | 0.059351 |
| CPPED1    | 16p13.12 | -0.164923734 | 0.02737  | 0.05937  |
| NPAP1     | 15q11.2  | -0.164921015 | 0.027373 | 0.05937  |
| NT5C1A    | 1p34.2   | -0.164912267 | 0.027381 | 0.059377 |
| ACHE      | 7q22.1   | 0.164911179  | 0.027382 | 0.059377 |
| SEMA4C    | 2q11.2   | 0.164892348  | 0.0274   | 0.05941  |
| KCNS3     | 2p24.2   | 0.164854686  | 0.027436 | 0.059474 |
| TEX30     | 13q33.1  | -0.164854686 | 0.027436 | 0.059474 |
| RPS6KB1   | 17q23.1  | -0.164848409 | 0.027442 | 0.059481 |
| FBXL7     | 5p15.1   | -0.164840039 | 0.027449 | 0.059492 |
| SERPINH1  | 11q13.5  | 0.164810746  | 0.027477 | 0.059537 |
| SLFN12L   | 17q12    | -0.164809786 | 0.027478 | 0.059537 |
| RASSF6    | 4q13.3   | 0.164808654  | 0.027479 | 0.059537 |
| WDR13     | Xp11.23  | 0.164804469  | 0.027483 | 0.059539 |
| NR2E3     | 15q23    | 0.164790552  | 0.027497 | 0.059557 |
| GRIN3B    | 19p13.3  | 0.164789486  | 0.027498 | 0.059557 |
| CXCR2P1   | 2q35     | -0.164768365 | 0.027518 | 0.059595 |
| KCNA4     | 11p14.1  | -0.164754758 | 0.027531 | 0.059616 |
| ANKS6     | 9q22.33  | 0.164745883  | 0.027539 | 0.059628 |
| LOC150776 | 2q21.1   | 0.164672651  | 0.027609 | 0.059769 |

|           |           |              |          |          |
|-----------|-----------|--------------|----------|----------|
| SERPINA6  | 14q32. 13 | -0.164671691 | 0.02761  | 0.059769 |
| SOCS6     | 18q22. 2  | -0.164624527 | 0.027655 | 0.05986  |
| PARL      | 3q27. 1   | 0.164616157  | 0.027663 | 0.059871 |
| PNPLA7    | 9q34. 3   | -0.164591049 | 0.027687 | 0.059916 |
| CRPPA     | 7p21. 2   | -0.164582679 | 0.027695 | 0.059927 |
| LOC100132 | 2p15      | 0.164561756  | 0.027715 | 0.059962 |
| GABRA2    | 4p12      | -0.164559433 | 0.027718 | 0.059962 |
| HSD17B4   | 5q23. 1   | -0.164549202 | 0.027727 | 0.059977 |
| PSTK      | 10q26. 13 | -0.164492708 | 0.027782 | 0.060088 |
| YWHAH     | 22q12. 3  | 0.164482246  | 0.027792 | 0.060103 |
| HAMP      | 19q13. 12 | 0.164461667  | 0.027812 | 0.06014  |
| TBRG1     | 11q24. 2  | 0.164457138  | 0.027816 | 0.060143 |
| SMPDL3B   | 1p35. 3   | 0.164446676  | 0.027826 | 0.060158 |
| NUP42     | 7p15. 3   | -0.16443203  | 0.02784  | 0.06018  |
| CFAP97    | 4q35. 1   | -0.164429937 | 0.027842 | 0.06018  |
| GPATCH1   | 19q13. 11 | 0.164420608  | 0.027851 | 0.060193 |
| MPPE1     | 18p11. 21 | 0.164406922  | 0.027864 | 0.060212 |
| HLA-C     | 6p21. 33  | 0.164404829  | 0.027866 | 0.060212 |
| CEACAM8   | 19q13. 2  | 0.164262061  | 0.028004 | 0.060504 |
| GOSR2     | 17q21. 32 | -0.164258364 | 0.028008 | 0.060505 |
| BMS1      | 10q11. 21 | 0.164249995  | 0.028016 | 0.06051  |
| KIR2DL1   | 19q13. 42 | -0.164249489 | 0.028016 | 0.06051  |
| ATMIN     | 16q23. 2  | -0.164241625 | 0.028024 | 0.060514 |
| OSGEP     | 14q11. 2  | 0.164241625  | 0.028024 | 0.060514 |
| PRSS40A   | 2q21. 1   | -0.164232425 | 0.028033 | 0.060527 |
| GLIS3     | 9p24. 2   | -0.164164208 | 0.028099 | 0.060661 |
| METTL17   | 14q11. 2  | 0.164162116  | 0.028101 | 0.060661 |
| TBK1      | 12q14. 2  | -0.164157931 | 0.028105 | 0.060663 |
| ARHGAP12  | 10p11. 22 | 0.164111899  | 0.02815  | 0.060753 |
| EPHB6     | 7q34      | 0.164080514  | 0.02818  | 0.060812 |
| H3F3C     | 12p11. 21 | 0.164076329  | 0.028185 | 0.060814 |
| FXVD2     | 11q23. 3  | -0.164072144 | 0.028189 | 0.060815 |
| TGFB2     | 1q41      | 0.164070052  | 0.028191 | 0.060815 |
| CFAP45    | 1q23. 2   | 0.16402402   | 0.028235 | 0.060905 |
| MT1B      | 16q13     | -0.164010384 | 0.028249 | 0.060927 |
| SLC24A4   | 14q32. 12 | -0.163980167 | 0.028278 | 0.060977 |
| SIN3A     | 15q24. 2  | -0.163980081 | 0.028278 | 0.060977 |
| CHST2     | 3q24      | -0.163973804 | 0.028284 | 0.060984 |
| RNF152    | 18q21. 33 | -0.163969619 | 0.028289 | 0.060986 |
| DNAJC9    | 10q22. 2  | 0.163940326  | 0.028317 | 0.061041 |
| HIST1H4I  | 6p22. 1   | 0.16391943   | 0.028338 | 0.061079 |
| PAICS     | 4q12      | 0.163888017  | 0.028368 | 0.061132 |
| NFIA      | 1p31. 3   | -0.163888017 | 0.028368 | 0.061132 |
| PHYHIP    | 8p21. 3   | 0.163871278  | 0.028385 | 0.061161 |
| FAM237A   | 2q33. 3   | -0.163842267 | 0.028413 | 0.061215 |
| BABAM2-AS | 2p23. 2   | -0.163806415 | 0.028448 | 0.061284 |
| IRGC      | 19q13. 31 | 0.163760997  | 0.028493 | 0.061368 |
| NAV3      | 12q21. 2  | -0.163758291 | 0.028496 | 0.061368 |
| C15ORF61  | 15q23     | -0.16375733  | 0.028496 | 0.061368 |
| ADIPOR1   | 1q32. 1   | 0.163743644  | 0.02851  | 0.061391 |
| AHNAK     | 11q12. 3  | 0.163724813  | 0.028528 | 0.061424 |
| GZMH      | 14q12     | -0.163697613 | 0.028555 | 0.061475 |
| PLGLB2    | 2p11. 2   | -0.163687151 | 0.028566 | 0.06149  |
| PTPN5     | 11p15. 1  | -0.163670308 | 0.028582 | 0.06152  |

|           |           |              |          |          |
|-----------|-----------|--------------|----------|----------|
| IRF5      | 7q32.1    | 0.16365995   | 0.028592 | 0.061535 |
| GADD45A   | 1p31.3    | 0.163649488  | 0.028603 | 0.06155  |
| SPNS1     | 16p11.2   | 0.163645304  | 0.028607 | 0.061553 |
| PCDHGB4   | 5q31.3    | -0.163641119 | 0.028611 | 0.061555 |
| OSBPL5    | 11p15.4   | 0.16363275   | 0.028619 | 0.061559 |
| ZKSCAN4   | 6p22.1    | -0.16363275  | 0.028619 | 0.061559 |
| NUP58     | 13q12.13  | -0.163601364 | 0.02865  | 0.061618 |
| PADI6     | 1p36.13   | -0.163597169 | 0.028654 | 0.061618 |
| DEUP1     | 11q21     | -0.163595695 | 0.028656 | 0.061618 |
| RABGEF1   | 7q11.21   | -0.163582533 | 0.028669 | 0.06164  |
| VASN      | 16p13.3   | 0.163578348  | 0.028673 | 0.061642 |
| ITFG1     | 16q12.1   | -0.163534409 | 0.028716 | 0.061726 |
| KMT2E     | 7q22.3    | -0.163532316 | 0.028718 | 0.061726 |
| KIAA1211I | 2q11.2    | 0.163528132  | 0.028722 | 0.061729 |
| PLA2G2D   | 1p36.12   | -0.163524375 | 0.028726 | 0.06173  |
| AKR7A2P1  | 1p13.2    | 0.163517394  | 0.028733 | 0.061738 |
| TRAF1     | 9q33.2    | -0.163494654 | 0.028756 | 0.061773 |
| ZFP36L1   | 14q24.1   | 0.163494654  | 0.028756 | 0.061773 |
| TGM4      | 3p21.31   | 0.163483245  | 0.028767 | 0.061791 |
| PKD2      | 17q21.33  | -0.163480008 | 0.02877  | 0.061791 |
| LOC401127 | 4p14      | -0.163456992 | 0.028793 | 0.061833 |
| CMBL      | 5p15.2    | 0.163427699  | 0.028822 | 0.061887 |
| DLG3      | Xq13.1    | 0.163425606  | 0.028824 | 0.061887 |
| ACTL8     | 1p36.13   | 0.163381181  | 0.028868 | 0.061975 |
| PTBP3     | 9q32      | 0.163377482  | 0.028872 | 0.061976 |
| POMGNT1   | 1p34.1    | -0.163362836 | 0.028886 | 0.061999 |
| SCHIP1    | 3q25.32-c | -0.163360743 | 0.028888 | 0.061999 |
| LINC01554 | 5q15      | -0.16334836  | 0.028901 | 0.062012 |
| CNNM1     | 10q24.2   | 0.163348189  | 0.028901 | 0.062012 |
| UPF1      | 19p13.11  | 0.163289603  | 0.028959 | 0.062131 |
| COQ8B     | 19q13.2   | 0.163249848  | 0.028999 | 0.062209 |
| HSP90AB4F | 15q21.3   | 0.163246576  | 0.029002 | 0.062209 |
| TMEM88B   | 1p36.33   | 0.16323445   | 0.029014 | 0.062228 |
| OTC       | Xp11.4    | -0.163230945 | 0.029018 | 0.062229 |
| HSPA9     | 5q31.2    | -0.163226832 | 0.029022 | 0.062231 |
| GALNT4    | 12q21.33  | 0.163222648  | 0.029026 | 0.062234 |
| GPR182    | 12q13.3   | -0.163212327 | 0.029036 | 0.062249 |
| MMS19     | 10q24.1   | 0.163208001  | 0.029041 | 0.06225  |
| TOMM70    | 3q12.2    | -0.163205909 | 0.029043 | 0.06225  |
| HNRNPC    | 14q11.2   | 0.163199632  | 0.029049 | 0.062256 |
| TFDP2     | 3q23      | 0.163149415  | 0.029099 | 0.062357 |
| NAPEPLD   | 7q22.1    | 0.163132676  | 0.029116 | 0.062386 |
| PLEK      | 2p14      | -0.163061536 | 0.029187 | 0.062532 |
| MMP10     | 11q22.2   | 0.163053252  | 0.029195 | 0.062543 |
| ARSD      | Xp22.33   | 0.163044797  | 0.029204 | 0.062555 |
| EFEMP1    | 2p16.1    | -0.162979934 | 0.029269 | 0.062688 |
| TRAPPC4   | 11q23.3   | 0.162956918  | 0.029292 | 0.062731 |
| MRPL46    | 15q25.3   | 0.162952734  | 0.029296 | 0.062733 |
| OTUD4     | 4q31.21   | -0.16293181  | 0.029318 | 0.062771 |
| LINC0203E | 3q21.1    | -0.162908794 | 0.029341 | 0.062814 |
| CXCL5     | 4q13.3    | 0.162887871  | 0.029362 | 0.062853 |
| CRYGS     | 3q27.3    | 0.16278953   | 0.029461 | 0.063058 |
| LRRC59    | 17q21.33  | 0.162785345  | 0.029465 | 0.063061 |
| TUBB3     | 16q24.3   | 0.162779068  | 0.029472 | 0.063067 |

|           |          |              |          |          |
|-----------|----------|--------------|----------|----------|
| TTI1      | 20q11.23 | -0.162758144 | 0.029493 | 0.063106 |
| SCART1    | 10q26.3  | 0.16274559   | 0.029506 | 0.063117 |
| ITGB1BP1  | 2p25.1   | 0.162741406  | 0.02951  | 0.063117 |
| ADAM2     | 8p11.22  | -0.162739444 | 0.029512 | 0.063117 |
| EX05      | 1p34.2   | -0.162737306 | 0.029514 | 0.063117 |
| MIS18A    | 21q22.11 | 0.162737306  | 0.029514 | 0.063117 |
| CHGA      | 14q32.12 | -0.162722574 | 0.029529 | 0.063142 |
| NELL2     | 12q12    | -0.162712113 | 0.029539 | 0.063158 |
| LMOD3     | 3p14.1   | 0.162705836  | 0.029546 | 0.063165 |
| RSPO4     | 20p13    | -0.162694984 | 0.029557 | 0.063182 |
| EN2       | 7q36.3   | 0.162689776  | 0.029562 | 0.063186 |
| UBA5      | 3q22.1   | -0.162678635 | 0.029573 | 0.063204 |
| FAM102A   | 9q34.11  | 0.162643065  | 0.029609 | 0.06327  |
| LRP4      | 11p11.2  | -0.16263888  | 0.029614 | 0.06327  |
| C5ORF30   | 5q21.1   | 0.162636788  | 0.029616 | 0.06327  |
| LINC00654 | 20p12.3  | -0.162628418 | 0.029624 | 0.06327  |
| NECAB1    | 8q21.3   | -0.162626326 | 0.029626 | 0.06327  |
| CCDC152   | 5p12     | -0.162622141 | 0.029631 | 0.06327  |
| ZNF208    | 19p12    | -0.162622141 | 0.029631 | 0.06327  |
| LOC100130 | 11q13.2  | 0.162620134  | 0.029633 | 0.06327  |
| ASPM      | 1q31.3   | 0.162620049  | 0.029633 | 0.06327  |
| RPAIN     | 17p13.2  | -0.162597033 | 0.029656 | 0.063313 |
| FPR3      | 19q13.41 | -0.162569832 | 0.029684 | 0.063366 |
| CALM3     | 19q13.32 | 0.162490323  | 0.029765 | 0.063532 |
| URM1      | 9q34.11  | 0.162469399  | 0.029786 | 0.06357  |
| RPS15AP1C | 1p34.1   | 0.16243469   | 0.029822 | 0.063639 |
| FAM118B   | 11q24.2  | 0.162406629  | 0.02985  | 0.063694 |
| ATP6VOA1  | 17q21.2  | -0.162383613 | 0.029874 | 0.063737 |
| AXIN2     | 17q24.1  | -0.162333396 | 0.029925 | 0.06384  |
| PHF20L1   | 8q24.22  | -0.162293641 | 0.029966 | 0.063918 |
| PPIEL     | 1p34.3   | -0.162291549 | 0.029968 | 0.063918 |
| RPL22L1   | 3q26.2   | 0.162262256  | 0.029998 | 0.063975 |
| ARPIN     | 15q26.1  | -0.162216224 | 0.030045 | 0.064069 |
| ALG11     | 13q14.3  | 0.162184839  | 0.030078 | 0.064131 |
| CD70      | 19p13.3  | 0.162146215  | 0.030118 | 0.064209 |
| CAGE1     | 6p24.3   | -0.162134314 | 0.03013  | 0.064228 |
| GBAP1     | 1q22     | 0.162126253  | 0.030138 | 0.064237 |
| EXOC3L2   | 19q13.32 | -0.16212416  | 0.03014  | 0.064237 |
| CREB3L3   | 19p13.3  | 0.162116355  | 0.030148 | 0.064247 |
| EEFSEC    | 3q21.3   | 0.16208859   | 0.030177 | 0.064301 |
| C9ORF135  | 9q21.12  | -0.162054396 | 0.030212 | 0.06437  |
| SHLD2P3   | 10q11.22 | -0.162038374 | 0.030229 | 0.064398 |
| PLA2G6    | 22q13.1  | -0.162032097 | 0.030235 | 0.064405 |
| C3ORF20   | 3p25.1   | -0.162024979 | 0.030243 | 0.064414 |
| STYX      | 14q22.1  | -0.161996527 | 0.030272 | 0.06447  |
| CCL7      | 17q12    | 0.161987527  | 0.030281 | 0.064483 |
| HYLS1     | 11q24.2  | -0.161965141 | 0.030305 | 0.064525 |
| MPLKIP    | 7p14.1   | 0.161929571  | 0.030341 | 0.064597 |
| COG7      | 16p12.2  | 0.161921202  | 0.03035  | 0.064608 |
| CKM       | 19q13.32 | 0.161915259  | 0.030356 | 0.064614 |
| HLA-G     | 6p22.1   | 0.16191074   | 0.030361 | 0.064618 |
| EDN2      | 1p34.2   | 0.161820938  | 0.030454 | 0.064809 |
| IL2       | 4q27     | -0.161811798 | 0.030464 | 0.064822 |
| SLC10A7   | 4q31.22  | -0.161785199 | 0.030491 | 0.064874 |

|            |          |              |          |          |
|------------|----------|--------------|----------|----------|
| STK4       | 20q13.12 | -0.161741259 | 0.030537 | 0.064965 |
| GTF2IRD2F7 | 7q11.23  | -0.161714059 | 0.030565 | 0.065018 |
| ZNF99      | 19p12    | -0.161695976 | 0.030584 | 0.065051 |
| DIPK1C     | 18q22.3  | 0.161654511  | 0.030628 | 0.065137 |
| SPRR2E     | 1q21.3   | 0.161621012  | 0.030663 | 0.065199 |
| ENPP6      | 4q35.1   | -0.161620241 | 0.030663 | 0.065199 |
| LAG3       | 12p13.31 | -0.161609441 | 0.030675 | 0.065214 |
| PUF60      | 8q24.3   | 0.161607348  | 0.030677 | 0.065214 |
| CYP26B1    | 2p13.2   | -0.161584332 | 0.030701 | 0.065258 |
| DNAJC14    | 12q13.2  | -0.161536208 | 0.030751 | 0.065358 |
| TRNT1      | 3p26.2   | 0.161527839  | 0.03076  | 0.06537  |
| GNB3       | 12p13.31 | -0.16147553  | 0.030815 | 0.06548  |
| PHETA2     | 22q13.2  | 0.161462976  | 0.030828 | 0.065501 |
| SH3YL1     | 2p25.3   | 0.161421129  | 0.030872 | 0.065587 |
| KCNV1      | 8q23.2   | -0.161396286 | 0.030898 | 0.065636 |
| COL9A2     | 1p34.2   | 0.161383466  | 0.030912 | 0.065658 |
| SKAP1      | 17q21.32 | 0.161362543  | 0.030934 | 0.065695 |
| LSM14A     | 19q13.11 | -0.16136045  | 0.030936 | 0.065695 |
| ATF6       | 1q23.3   | -0.161341619 | 0.030956 | 0.06573  |
| DAD1       | 14q11.2  | 0.161331157  | 0.030967 | 0.065744 |
| TARSL2     | 15q26.3  | -0.161329065 | 0.030969 | 0.065744 |
| CCNF       | 16p13.3  | 0.161316511  | 0.030983 | 0.065765 |
| FMN1       | 15q13.3  | 0.16129768   | 0.031002 | 0.065801 |
| BATF3      | 1q32.3   | -0.16128931  | 0.031011 | 0.065812 |
| ZNF284     | 19q13.31 | 0.161280941  | 0.03102  | 0.065824 |
| MASTL      | 10p12.1  | 0.161272571  | 0.031029 | 0.065836 |
| PSMC6      | 14q22.1  | 0.161249555  | 0.031053 | 0.065881 |
| PDE12      | 3p14.3   | -0.161241186 | 0.031062 | 0.065892 |
| SARDH      | 9q34.2   | -0.161190969 | 0.031115 | 0.065998 |
| PPIL3      | 2q33.1   | 0.161182684  | 0.031124 | 0.06601  |
| PRR19      | 19q13.2  | 0.161176323  | 0.031131 | 0.066017 |
| NXF1       | 11q12.3  | -0.161161676 | 0.031146 | 0.066043 |
| ADAM10     | 15q21.3  | 0.161151215  | 0.031157 | 0.066059 |
| NR4A1      | 12q13.13 | -0.161136568 | 0.031173 | 0.066078 |
| NSMCE2     | 8q24.13  | 0.161136568  | 0.031173 | 0.066078 |
| C10RF61    | 1q22     | -0.161109442 | 0.031202 | 0.066132 |
| MOCS3      | 20q13.13 | -0.161105183 | 0.031206 | 0.066135 |
| PPP4R2     | 3p13     | -0.161084259 | 0.031228 | 0.066175 |
| SIGLEC10   | 19q13.41 | -0.161069613 | 0.031244 | 0.066201 |
| TMEM208    | 16q22.1  | 0.161048689  | 0.031266 | 0.066241 |
| PAPOLG     | 2p16.1   | -0.161042412 | 0.031273 | 0.066246 |
| TRARG1     | 17p13.3  | -0.161040396 | 0.031275 | 0.066246 |
| INCENP     | 11q12.3  | 0.161029858  | 0.031286 | 0.066262 |
| SLC04C1    | 5q21.1   | -0.16101948  | 0.031297 | 0.066279 |
| C1QTNF9B   | 13q12.12 | -0.161015961 | 0.031301 | 0.06628  |
| LINC01816  | 2p13.3   | -0.16097797  | 0.031342 | 0.066358 |
| SPATA41    | 15q26.3  | -0.160941017 | 0.031381 | 0.066435 |
| GAS2LIP2   | 9q22.33  | -0.160932853 | 0.03139  | 0.066445 |
| PRAMEF20   | 1p36.21  | -0.160929807 | 0.031393 | 0.066445 |
| CD320      | 19p13.2  | -0.160927332 | 0.031396 | 0.066445 |
| WSB2       | 12q24.23 | -0.160921055 | 0.031402 | 0.066452 |
| SNRNP25    | 16p13.3  | -0.160910594 | 0.031413 | 0.066468 |
| RBM44      | 2q37.3   | 0.160906577  | 0.031418 | 0.06647  |
| ITGB1      | 10p11.22 | 0.160862469  | 0.031465 | 0.066563 |

|           |           |               |           |           |
|-----------|-----------|---------------|-----------|-----------|
| IL11      | 19q13. 42 | 0. 160856192  | 0. 031472 | 0. 06657  |
| SLC6A7    | 5q32      | 0. 160843273  | 0. 031485 | 0. 066592 |
| PLEKHG3   | 14q23. 3  | 0. 160824807  | 0. 031505 | 0. 066627 |
| SNX20     | 16q12. 1  | -0. 160789237 | 0. 031543 | 0. 066698 |
| L1CAM     | Xq28      | -0. 160787145 | 0. 031545 | 0. 066698 |
| TNFSF10   | 3q26. 31  | 0. 160736928  | 0. 031599 | 0. 066805 |
| TUBGCP3   | 13q34     | -0. 160695081 | 0. 031644 | 0. 066893 |
| CCDC114   | 19q13. 33 | 0. 160661603  | 0. 03168  | 0. 066962 |
| HOXB2     | 17q21. 32 | 0. 160634403  | 0. 031709 | 0. 067017 |
| HRK       | 12q24. 22 | 0. 160601989  | 0. 031744 | 0. 067083 |
| DTWD2     | 5q23. 1   | -0. 160590463 | 0. 031757 | 0. 067102 |
| CDHR4     | 3p21. 31  | 0. 160586543  | 0. 031761 | 0. 067104 |
| KBTBD11   | 8p23. 3   | 0. 160479568  | 0. 031876 | 0. 067341 |
| MROH2B    | 5p13. 1   | -0. 160457321 | 0. 0319   | 0. 067376 |
| SUGP1     | 19p13. 11 | 0. 160456552  | 0. 031901 | 0. 067376 |
| LINC00113 | 21q21. 3  | 0. 16045478   | 0. 031903 | 0. 067376 |
| LOC285593 | 5q35. 2   | -0. 160445761 | 0. 031913 | 0. 06739  |
| LOC728613 | 5p15. 33  | -0. 160425167 | 0. 031935 | 0. 06743  |
| KRT83     | 12q13. 13 | 0. 160394825  | 0. 031968 | 0. 067492 |
| AP5Z1     | 7p22. 1   | 0. 160379135  | 0. 031985 | 0. 067521 |
| AGL       | 1p21. 2   | -0. 160366581 | 0. 031999 | 0. 067542 |
| CARD14    | 17q25. 3  | 0. 160358211  | 0. 032008 | 0. 067554 |
| TMEM260   | 14q22. 3  | -0. 160328918 | 0. 03204  | 0. 067614 |
| NFE2      | 12q13. 13 | 0. 160320549  | 0. 032049 | 0. 067626 |
| C16ORF58  | 16p11. 2  | 0. 16031218   | 0. 032058 | 0. 067639 |
| OLFM4     | 13q14. 3  | 0. 160302848  | 0. 032068 | 0. 067653 |
| LONRF1    | 8p23. 1   | -0. 160278702 | 0. 032094 | 0. 067691 |
| ANKRD34A  | 1q21. 1   | 0. 16027661   | 0. 032096 | 0. 067691 |
| SEPHS2    | 16p11. 2  | 0. 16027661   | 0. 032096 | 0. 067691 |
| SHANK1    | 19q13. 33 | -0. 160261001 | 0. 032113 | 0. 06772  |
| PACRG-AS1 | 16q26     | -0. 160242799 | 0. 032133 | 0. 067755 |
| PRH1      | 12p13. 2  | -0. 160224384 | 0. 032153 | 0. 06779  |
| SMCP      | 1q21. 3   | -0. 160219736 | 0. 032158 | 0. 067793 |
| DRD5      | 4p16. 1   | -0. 160201902 | 0. 032178 | 0. 067827 |
| MAFG      | 17q25. 3  | -0. 160182453 | 0. 032199 | 0. 067865 |
| ZSCAN23   | 6p22. 1   | -0. 160133075 | 0. 032253 | 0. 067971 |
| LINC00114 | 21q22. 2  | -0. 160109809 | 0. 032278 | 0. 068018 |
| SEMA3C    | 7q21. 11  | 0. 160086205  | 0. 032304 | 0. 068065 |
| DMBT1     | 10q26. 13 | 0. 160069466  | 0. 032322 | 0. 068096 |
| MYO7B     | 2q14. 3   | 0. 160042266  | 0. 032352 | 0. 068152 |
| GRIK3     | 1p34. 3   | -0. 160012973 | 0. 032384 | 0. 068211 |
| GPR141    | 7p14. 1   | -0. 160010128 | 0. 032387 | 0. 068211 |
| PAXB1     | 21q22. 11 | -0. 160006696 | 0. 032391 | 0. 068212 |
| LIN9      | 1q42. 12  | 0. 160000418  | 0. 032398 | 0. 068219 |
| TDP1      | 14q32. 11 | -0. 159979495 | 0. 032421 | 0. 068261 |
| GOLGA8IP  | 15q11. 2  | -0. 1599608   | 0. 032441 | 0. 068296 |
| N4BP2L1   | 13q13. 1  | -0. 159933463 | 0. 032471 | 0. 068352 |
| DACT1     | 14q23. 1  | -0. 159914632 | 0. 032492 | 0. 068389 |
| ADGB      | 6q24. 3   | -0. 159879494 | 0. 032531 | 0. 068463 |
| XCL2      | 1q24. 2   | -0. 159870273 | 0. 032541 | 0. 068477 |
| RPL32P3   | 3q21. 3   | 0. 159851861  | 0. 032561 | 0. 068512 |
| ACTBL2    | 5q11. 2   | 0. 159834822  | 0. 03258  | 0. 068545 |
| NTRK3     | 15q25. 3  | -0. 159812106 | 0. 032605 | 0. 06859  |
| ZNF18     | 17p12     | -0. 15978909  | 0. 03263  | 0. 068636 |



|           |          |              |          |          |
|-----------|----------|--------------|----------|----------|
| SP1       | 12q13.13 | 0.159749336  | 0.032674 | 0.068712 |
| RASGRP4   | 19q13.2  | -0.159747243 | 0.032676 | 0.068712 |
| KLHDC4    | 16q24.2  | 0.159747243  | 0.032676 | 0.068712 |
| SLC2A12   | 6q23.2   | -0.159720043 | 0.032707 | 0.068768 |
| FOSB      | 19q13.32 | -0.159663549 | 0.032769 | 0.068892 |
| UBE3B     | 12q24.11 | -0.159659364 | 0.032774 | 0.068894 |
| GBP3      | 1p22.2   | 0.159650995  | 0.032783 | 0.068906 |
| SERPINF1  | 17p13.3  | -0.159621702 | 0.032815 | 0.068967 |
| TMEM63A   | 1q42.12  | 0.159609148  | 0.032829 | 0.068989 |
| FERMT3    | 11q13.1  | 0.159602871  | 0.032836 | 0.068997 |
| GSTM1     | 1p13.3   | 0.159579494  | 0.032862 | 0.069044 |
| DLEU7     | 13q14.3  | 0.159573366  | 0.032869 | 0.069046 |
| SLC17A3   | 6p22.2   | -0.15957248  | 0.03287  | 0.069046 |
| PRDM15    | 21q22.3  | -0.159565208 | 0.032878 | 0.069056 |
| FTH1P3    | 2p23.3   | 0.159529638  | 0.032917 | 0.069131 |
| CES3      | 16q22.1  | 0.159521269  | 0.032927 | 0.069141 |
| ZCCHC7    | 9p13.2   | -0.159519176 | 0.032929 | 0.069141 |
| ENAH      | 1q42.12  | -0.159502438 | 0.032948 | 0.069173 |
| ANKRD18DF | 3q29     | -0.159486403 | 0.032966 | 0.069202 |
| PLXNA3    | Xq28     | 0.159483606  | 0.032969 | 0.069202 |
| LOC100129 | 9q33.3   | -0.15946896  | 0.032985 | 0.069229 |
| RPL3L     | 16p13.3  | -0.159448084 | 0.033008 | 0.069271 |
| ADPRHL1   | 13q34    | 0.159435482  | 0.033022 | 0.069293 |
| GALNT7    | 4q34.1   | 0.159387358  | 0.033076 | 0.069398 |
| GRHL3     | 1p36.11  | 0.159351871  | 0.033115 | 0.069474 |
| ABI1      | 10p12.1  | 0.159337141  | 0.033132 | 0.069499 |
| THADA     | 2p21     | 0.159332957  | 0.033137 | 0.069499 |
| AKR1C4    | 10p15.1  | -0.159331912 | 0.033138 | 0.069499 |
| CCDC159   | 19p13.2  | 0.159293202  | 0.033181 | 0.069582 |
| PRELID3B  | 20q13.32 | 0.159276463  | 0.0332   | 0.069614 |
| FAHD2CP   | 2q11.2   | 0.159266001  | 0.033211 | 0.069632 |
| INSM2     | 14q13.2  | -0.159248661 | 0.033231 | 0.069665 |
| TGIF2     | 20q11.23 | 0.159245078  | 0.033235 | 0.069666 |
| TPRKB     | 2p13.1   | 0.159201138  | 0.033284 | 0.069762 |
| TIMM10    | 11q12.1  | 0.159161467  | 0.033329 | 0.069848 |
| DYNAP     | 18q21.2  | -0.159154927 | 0.033336 | 0.069856 |
| PCDHB14   | 5q31.3   | 0.159149959  | 0.033342 | 0.06986  |
| CHD5      | 1p36.31  | -0.15913209  | 0.033362 | 0.069895 |
| SOWAHB    | 4q21.1   | 0.159121629  | 0.033373 | 0.069912 |
| NUMA1     | 11q13.4  | 0.15910489   | 0.033392 | 0.069944 |
| ODAM      | 4q13.3   | 0.159097699  | 0.0334   | 0.069954 |
| TMED1     | 19p13.2  | 0.159046304  | 0.033458 | 0.070063 |
| ENGASE    | 17q25.3  | 0.159044211  | 0.033461 | 0.070063 |
| DMAC2     | 19q13.2  | 0.159042119  | 0.033463 | 0.070063 |
| SCRG1     | 4q34.1   | -0.158991986 | 0.033519 | 0.070174 |
| ERGIC3    | 20q11.22 | 0.158985626  | 0.033527 | 0.070182 |
| SMG5      | 1q22     | 0.158977256  | 0.033536 | 0.070194 |
| SCGB1D1   | 11q12.3  | -0.158942981 | 0.033575 | 0.070268 |
| C7ORF61   | 7q22.1   | 0.158935409  | 0.033583 | 0.070278 |
| LOC730668 | 22q13.31 | 0.158918787  | 0.033602 | 0.07031  |
| MYSM1     | 1p32.1   | -0.158881008 | 0.033645 | 0.070392 |
| PER2      | 2q37.3   | -0.158868454 | 0.033659 | 0.070415 |
| PRL       | 6p22.3   | -0.158781102 | 0.033758 | 0.070614 |
| SSR4      | Xq28     | -0.15877639  | 0.033763 | 0.070618 |

|           |           |               |           |           |
|-----------|-----------|---------------|-----------|-----------|
| PRKX      | Xp22. 33  | -0. 158751282 | 0. 033792 | 0. 070671 |
| PPP1R14A  | 19q13. 2  | 0. 158747097  | 0. 033797 | 0. 070672 |
| RNASE13   | 14q11. 2  | 0. 158744316  | 0. 0338   | 0. 070672 |
| SPANXC    | Xq27. 2   | 0. 158727917  | 0. 033818 | 0. 070704 |
| TARS      | 5p13. 3   | -0. 158715712 | 0. 033832 | 0. 070725 |
| TFPT      | 19q13. 42 | 0. 158709434  | 0. 033839 | 0. 070733 |
| TVP23C    | 17p12     | -0. 15870525  | 0. 033844 | 0. 070736 |
| RRN3P1    | 16p12. 2  | 0. 158690603  | 0. 033861 | 0. 070763 |
| GUCY2GP   | 10q25. 2  | 0. 15868418   | 0. 033868 | 0. 070771 |
| KLRC3     | 12p13. 2  | -0. 158672913 | 0. 033881 | 0. 07079  |
| MTHFS     | 15q25. 1  | 0. 158644571  | 0. 033913 | 0. 07085  |
| DHRS12    | 13q14. 3  | 0. 15859017   | 0. 033975 | 0. 070972 |
| SNTG1     | 8q11. 21  | -0. 158558352 | 0. 034012 | 0. 071041 |
| UGCG      | 9q31. 3   | -0. 158537861 | 0. 034035 | 0. 071076 |
| DSCR4     | 21q22. 13 | -0. 158537517 | 0. 034035 | 0. 071076 |
| PLPP6     | 9p24. 1   | -0. 158521122 | 0. 034054 | 0. 071107 |
| CLTCL1    | 22q11. 21 | -0. 158445798 | 0. 03414  | 0. 07128  |
| EXOC3-AS1 | 15p15. 33 | -0. 158431151 | 0. 034157 | 0. 071305 |
| SLC35B2   | 6p21. 1   | 0. 158429059  | 0. 03416  | 0. 071305 |
| S1PR2     | 19p13. 2  | -0. 158406043 | 0. 034186 | 0. 071353 |
| RASGEF1A  | 10q11. 21 | -0. 158374657 | 0. 034222 | 0. 071421 |
| GDF7      | 2p24. 1   | -0. 158264408 | 0. 034349 | 0. 071677 |
| CHMP1B    | 18p11. 21 | 0. 15826167   | 0. 034352 | 0. 071677 |
| NEK7      | 1q31. 3   | 0. 158213546  | 0. 034407 | 0. 071785 |
| HIST1H3A  | 6p22. 2   | -0. 15818063  | 0. 034445 | 0. 071857 |
| ARF4      | 3p14. 3   | 0. 158134036  | 0. 034499 | 0. 071959 |
| FLRT3     | 20p12. 1  | 0. 158131944  | 0. 034502 | 0. 071959 |
| ZDHHC11   | 5p15. 33  | 0. 158102651  | 0. 034535 | 0. 072022 |
| LHFPL2    | 5q14. 1   | -0. 158098466 | 0. 03454  | 0. 072025 |
| C2CD2     | 21q22. 3  | -0. 158092189 | 0. 034548 | 0. 072032 |
| KRT40     | 17q21. 2  | -0. 158074795 | 0. 034568 | 0. 072067 |
| ZNF623    | 8q24. 3   | -0. 15803988  | 0. 034608 | 0. 072144 |
| TRPM8     | 2q37. 1   | 0. 15803443   | 0. 034615 | 0. 072149 |
| MOGS      | 2p13. 1   | 0. 158031511  | 0. 034618 | 0. 072149 |
| PSMD10    | Xq22. 3   | -0. 158025234 | 0. 034625 | 0. 072157 |
| BPIFA4P   | 20q11. 21 | -0. 158005351 | 0. 034648 | 0. 072197 |
| ADAP2     | 17q11. 2  | -0. 158000126 | 0. 034654 | 0. 072202 |
| TSHZ2     | 20q13. 2  | -0. 15797711  | 0. 034681 | 0. 072245 |
| SLC51B    | 15q22. 31 | -0. 157976066 | 0. 034682 | 0. 072245 |
| IFI27L2   | 14q32. 12 | 0. 157949909  | 0. 034713 | 0. 072291 |
| PWP2      | 21q22. 3  | 0. 157947817  | 0. 034715 | 0. 072291 |
| SLAMF1    | 1q23. 3   | -0. 157947817 | 0. 034715 | 0. 072291 |
| HADH      | 4q25      | -0. 15794154  | 0. 034722 | 0. 072299 |
| ZNF257    | 19p12     | -0. 157936391 | 0. 034728 | 0. 072304 |
| ANKRD26P1 | 16q11. 2  | -0. 157926715 | 0. 03474  | 0. 07232  |
| UBE2E2    | 3p24. 3   | -0. 157868307 | 0. 034808 | 0. 072451 |
| ZBTB46    | 20q13. 33 | -0. 157866215 | 0. 03481  | 0. 072451 |
| CCL11     | 17q12     | -0. 157847466 | 0. 034832 | 0. 072489 |
| RHOXF2B   | Xq24      | -0. 15783315  | 0. 034849 | 0. 072516 |
| PTEN      | 10q23. 31 | -0. 157820183 | 0. 034864 | 0. 07254  |
| RAP1GAP   | 1p36. 12  | -0. 157815998 | 0. 034869 | 0. 072543 |
| DCAF17    | 2q31. 1   | -0. 157809721 | 0. 034876 | 0. 07255  |
| TREX1     | 3p21. 31  | 0. 157784613  | 0. 034905 | 0. 072604 |
| TEX13A    | Xq22. 3   | 0. 157763838  | 0. 034929 | 0. 072647 |

|           |            |               |           |           |
|-----------|------------|---------------|-----------|-----------|
| PIEZ02    | 18p11. 22- | -0. 157715565 | 0. 034986 | 0. 072756 |
| SMARCD2   | 17q23. 3   | 0. 157686272  | 0. 03502  | 0. 07282  |
| CLK3      | 15q24. 1   | 0. 157682087  | 0. 035025 | 0. 072823 |
| FLJ42393  | 3q27. 3    | 0. 157656319  | 0. 035055 | 0. 072878 |
| EN1       | 2q14. 2    | 0. 157646524  | 0. 035067 | 0. 072894 |
| PF4       | 4q13. 3    | 0. 157608858  | 0. 035111 | 0. 072978 |
| SMIM14    | 4p14       | -0. 15760467  | 0. 035116 | 0. 072981 |
| TET1      | 10q21. 3   | -0. 157575377 | 0. 03515  | 0. 073045 |
| IDH3G     | Xq28       | 0. 157564915  | 0. 035162 | 0. 073063 |
| RSPRY1    | 16q13      | -0. 157504237 | 0. 035234 | 0. 073204 |
| RPL23P8   | 7p21. 1    | 0. 157472852  | 0. 035271 | 0. 073273 |
| RNMT      | 18p11. 21  | -0. 157466575 | 0. 035278 | 0. 07328  |
| FAM86C1   | 11q13. 4   | 0. 157397527  | 0. 03536  | 0. 073442 |
| TCERG1    | 5q32       | 0. 157370326  | 0. 035392 | 0. 073501 |
| MCEMP1    | 19p13. 2   | 0. 157334838  | 0. 035434 | 0. 07358  |
| ZNF34     | 8q24. 3    | -0. 157280355 | 0. 035498 | 0. 073707 |
| SNORA1    | 11q21      | 0. 157275852  | 0. 035503 | 0. 07371  |
| MOSPD1    | Xq26. 3    | -0. 157257339 | 0. 035525 | 0. 073748 |
| SMIM7     | 19p13. 11  | 0. 157215492  | 0. 035575 | 0. 073843 |
| BNIP1     | 5q35. 1    | -0. 157198753 | 0. 035595 | 0. 073869 |
| SLC5A9    | 1p33       | -0. 157198753 | 0. 035595 | 0. 073869 |
| RACGAP1   | 12q13. 12  | 0. 157190384  | 0. 035605 | 0. 07388  |
| CTDP1     | 18q23      | -0. 157188291 | 0. 035607 | 0. 07388  |
| POU2F1    | 1q24. 2    | -0. 157171552 | 0. 035627 | 0. 073913 |
| PCK1      | 20q13. 31  | -0. 157131798 | 0. 035674 | 0. 074004 |
| EXO1      | 1q43       | 0. 15712552   | 0. 035682 | 0. 074011 |
| HIF1A     | 14q23. 2   | -0. 157102505 | 0. 035709 | 0. 074061 |
| RXRβ      | 6p21. 32   | -0. 157096227 | 0. 035717 | 0. 074068 |
| SLAIN2    | 4p11       | -0. 157073212 | 0. 035744 | 0. 074117 |
| GPRIN2    | 10q11. 22  | 0. 157066934  | 0. 035752 | 0. 074125 |
| NACC2     | 9q34. 3    | -0. 157058565 | 0. 035762 | 0. 074138 |
| SNORA74B  | 5q35. 1    | -0. 157032378 | 0. 035793 | 0. 074195 |
| STK38     | 6p21. 31   | 0. 15701881   | 0. 035809 | 0. 074221 |
| TTC24     | 1q22       | -0. 157011684 | 0. 035818 | 0. 074231 |
| TRIP13    | 5p15. 33   | 0. 156981148  | 0. 035854 | 0. 074299 |
| ZNF83     | 19q13. 41  | 0. 156964409  | 0. 035874 | 0. 074333 |
| DUSP11    | 2p13. 1    | 0. 15694767   | 0. 035894 | 0. 074364 |
| BOLA1     | 1q21. 2    | 0. 156943485  | 0. 035899 | 0. 074364 |
| SCARNA22  | 4p16. 3    | -0. 156939426 | 0. 035904 | 0. 074364 |
| TOP1P2    | 22q11. 23  | 0. 156939301  | 0. 035904 | 0. 074364 |
| MFSD1     | 3q25. 32   | -0. 15692047  | 0. 035926 | 0. 074403 |
| SYPL2     | 1p13. 3    | -0. 156903731 | 0. 035947 | 0. 074437 |
| ZCCHC12   | Xq24       | -0. 156887074 | 0. 035966 | 0. 07447  |
| PTP4A1    | 6q12       | -0. 156838868 | 0. 036024 | 0. 074582 |
| TWISTNB   | 7p21. 1    | -0. 156824221 | 0. 036042 | 0. 074611 |
| EIF4EBP1  | 8p11. 23   | 0. 156817944  | 0. 036049 | 0. 074619 |
| IL24      | 1q32. 1    | -0. 156810883 | 0. 036058 | 0. 074628 |
| SRY       | Yp11. 2    | -0. 15680626  | 0. 036063 | 0. 074632 |
| GRK1      | 13q34      | -0. 156796587 | 0. 036075 | 0. 074649 |
| NRG4      | 15q24. 2   | 0. 156758086  | 0. 036121 | 0. 074737 |
| CHSY1     | 15q26. 3   | -0. 15673425  | 0. 03615  | 0. 074788 |
| LINC0114C | 1p22. 3    | -0. 156677756 | 0. 036218 | 0. 074921 |
| EXOSC8    | 13q13. 3   | 0. 156669387  | 0. 036228 | 0. 074934 |
| CASZ1     | 1p36. 22   | 0. 156656833  | 0. 036243 | 0. 074958 |

|           |           |              |          |          |
|-----------|-----------|--------------|----------|----------|
| GDAP1L1   | 20q13.12  | -0.156631453 | 0.036274 | 0.075013 |
| NTAN1     | 16p13.11  | 0.156621263  | 0.036286 | 0.075031 |
| NPEPPS    | 17q21.32  | 0.156602431  | 0.036309 | 0.07507  |
| CD163     | 12p13.31  | -0.156543845 | 0.036379 | 0.075209 |
| BRDT      | 1p22.1    | -0.156528096 | 0.036399 | 0.07524  |
| PEX11G    | 19p13.2   | 0.156516645  | 0.036412 | 0.075261 |
| CDK15     | 2q33.1    | -0.156504389 | 0.036427 | 0.075284 |
| ZNF770    | 15q14     | -0.156464336 | 0.036476 | 0.075376 |
| C9ORF64   | 9q21.32   | -0.156443412 | 0.036501 | 0.075421 |
| NACA4P    | 8q22.3    | 0.156435043  | 0.036511 | 0.075434 |
| GRASP     | 12q13.13  | -0.156403657 | 0.036549 | 0.075505 |
| TMEM14C   | 6p24.2    | 0.156393196  | 0.036562 | 0.075523 |
| SCARF2    | 22q11.21  | 0.156389011  | 0.036567 | 0.075526 |
| ZNF526    | 19q13.2   | 0.156328333  | 0.036641 | 0.075671 |
| PPP6R2    | 22q13.33  | -0.156311594 | 0.036661 | 0.075705 |
| RAB11B    | 19p13.2   | 0.156286485  | 0.036692 | 0.07576  |
| MAPT-IT1  | 17q21.31  | -0.15625917  | 0.036725 | 0.075821 |
| AP5B1     | 11q13.1   | 0.156248823  | 0.036738 | 0.075838 |
| CDH4      | 20q13.33  | -0.156246355 | 0.036741 | 0.075838 |
| RAD51B    | 14q24.1   | 0.156238361  | 0.03675  | 0.07585  |
| IL13      | 5q31.1    | -0.156231732 | 0.036759 | 0.075859 |
| TLN2      | 15q22.2   | 0.156217438  | 0.036776 | 0.075879 |
| PAXX      | 9q34.3    | 0.156217438  | 0.036776 | 0.075879 |
| POLR1A    | 2p11.2    | -0.156213253 | 0.036781 | 0.075882 |
| KRTAP4-5  | 17q21.2   | -0.156193969 | 0.036805 | 0.075923 |
| FMO2      | 1q24.3    | -0.156179775 | 0.036822 | 0.075948 |
| C10ORF95  | 10q24.32  | 0.156177683  | 0.036824 | 0.075948 |
| RIPOR3    | 20q13.13  | -0.156169313 | 0.036835 | 0.075961 |
| MRAP2     | 6q14.2    | -0.156085619 | 0.036937 | 0.076164 |
| DLEC1     | 3p22.2    | 0.156075157  | 0.03695  | 0.076183 |
| WDR34     | 9q34.11   | 0.156037495  | 0.036996 | 0.07627  |
| RELL2     | 5q31.3    | 0.156018664  | 0.037019 | 0.07631  |
| CAPN14    | 2p23.1    | 0.156005441  | 0.037035 | 0.076336 |
| LINC01134 | 1p36.32   | 0.15597054   | 0.037078 | 0.076416 |
| LRRC4C    | 11p12     | -0.15596217  | 0.037089 | 0.076429 |
| AGPAT4    | 6q26      | -0.155920323 | 0.03714  | 0.076528 |
| ADRA2A    | 10q25.2   | 0.155895215  | 0.037171 | 0.076583 |
| LOXL4     | 10q24.2   | 0.155886845  | 0.037181 | 0.076597 |
| TLE4      | 9q21.31   | -0.155876384 | 0.037194 | 0.076615 |
| PTGR1     | 9q31.3    | 0.155868014  | 0.037204 | 0.076629 |
| ZNF574    | 19q13.2   | 0.155851275  | 0.037225 | 0.076663 |
| MPRIP     | 17p11.2   | 0.155824075  | 0.037259 | 0.076724 |
| UBE3C     | 7q36.3    | -0.155794782 | 0.037295 | 0.076791 |
| RBFOX1    | 16p13.3   | -0.155773313 | 0.037321 | 0.07683  |
| GUCA1A    | 6p21.1    | 0.155773102  | 0.037322 | 0.07683  |
| PCDHAC1   | 5q31.3    | -0.155761017 | 0.037336 | 0.076853 |
| PPEF1     | Xp22.13   | 0.155755027  | 0.037344 | 0.07686  |
| SAMD8     | 10q22.2   | -0.15574875  | 0.037352 | 0.076869 |
| CALY      | 10q26.3   | -0.155737602 | 0.037365 | 0.076889 |
| CRIP2     | 14q32.33  | 0.155723642  | 0.037383 | 0.076914 |
| PRR5L     | 11p13-p12 | 0.155721549  | 0.037385 | 0.076914 |
| TAS2R40   | 7q34      | -0.155706552 | 0.037404 | 0.076944 |
| TLN1      | 9p13.3    | -0.15566924  | 0.03745  | 0.077031 |
| CMTM2     | 16q21     | 0.155654675  | 0.037468 | 0.077061 |

|           |           |               |           |           |
|-----------|-----------|---------------|-----------|-----------|
| POLR2J    | 7q22. 1   | 0. 155646224  | 0. 037479 | 0. 077072 |
| NPHS2     | 1q25. 2   | 0. 155644043  | 0. 037481 | 0. 077072 |
| AVEN      | 15q14     | 0. 15563367   | 0. 037494 | 0. 07709  |
| NDUFA11   | 19p13. 3  | 0. 155616931  | 0. 037515 | 0. 077125 |
| POPDC2    | 3q13. 33  | -0. 155612747 | 0. 03752  | 0. 077128 |
| SIAH1     | 16q12. 1  | 0. 155589731  | 0. 037549 | 0. 077178 |
| MOG       | 6p22. 1   | -0. 155586944 | 0. 037552 | 0. 077178 |
| PLEKHG1   | 6q25. 1   | -0. 155564622 | 0. 03758  | 0. 077227 |
| LOC643923 | 11q22. 3  | 0. 15555832   | 0. 037588 | 0. 077235 |
| FAM9C     | Xp22. 2   | -0. 155541863 | 0. 037608 | 0. 077269 |
| RPL23AP7  | 2q14. 1   | 0. 155508129  | 0. 03765  | 0. 077347 |
| RGS2      | 1q31. 2   | -0. 155451635 | 0. 03772  | 0. 077484 |
| FBX016    | 8p21. 1   | -0. 155441173 | 0. 037734 | 0. 077495 |
| TLE1      | 9q21. 32  | -0. 155441173 | 0. 037734 | 0. 077495 |
| VAR5      | 6p21. 33  | 0. 155426527  | 0. 037752 | 0. 077524 |
| CENPH     | 5q13. 2   | 0. 155418157  | 0. 037762 | 0. 077538 |
| NOC2L     | 1p36. 33  | 0. 155413973  | 0. 037767 | 0. 077541 |
| DPYSL2    | 8p21. 2   | -0. 155378403 | 0. 037812 | 0. 077624 |
| COQ9      | 16q21     | 0. 155353294  | 0. 037843 | 0. 07768  |
| GPR65     | 14q31. 3  | -0. 155336556 | 0. 037864 | 0. 077715 |
| ABHD4     | 14q11. 2  | 0. 155290524  | 0. 037922 | 0. 077826 |
| NEIL2     | 8p23. 1   | -0. 15527797  | 0. 037938 | 0. 077844 |
| GOLGA8DP  | 15q11. 2  | -0. 155277045 | 0. 037939 | 0. 077844 |
| CYP4F30P  | 2q21. 1   | -0. 155221662 | 0. 038008 | 0. 077979 |
| COCH      | 14q12     | -0. 15516289  | 0. 038082 | 0. 078114 |
| RRAGC     | 1p34. 3   | -0. 15516289  | 0. 038082 | 0. 078114 |
| PLEKHM2   | 1p36. 21  | -0. 155133597 | 0. 038119 | 0. 078182 |
| MOGAT1    | 2q36. 1   | 0. 155127103  | 0. 038127 | 0. 07819  |
| DDX49     | 19p13. 11 | 0. 155123135  | 0. 038132 | 0. 078192 |
| TLCD5     | 11q23. 3  | -0. 155110581 | 0. 038148 | 0. 078217 |
| PIN4      | Xq13. 1   | 0. 155095935  | 0. 038166 | 0. 078244 |
| IL17C     | 16q24. 2  | 0. 155093989  | 0. 038169 | 0. 078244 |
| DTX3L     | 3q21. 1   | 0. 155068734  | 0. 0382   | 0. 078301 |
| CIART     | 1q21. 2   | 0. 155051995  | 0. 038221 | 0. 078328 |
| MFSD4A    | 1q32. 1   | 0. 155051995  | 0. 038221 | 0. 078328 |
| FRMD3     | 9q21. 32  | -0. 154993409 | 0. 038295 | 0. 078471 |
| DEK       | 6p22. 3   | -0. 15498504  | 0. 038306 | 0. 078485 |
| SARS2     | 19q13. 2  | 0. 154959931  | 0. 038338 | 0. 078542 |
| TECPR1    | 7q21. 3   | -0. 1549411   | 0. 038361 | 0. 078583 |
| COPS6     | 7q22. 1   | 0. 154926454  | 0. 03838  | 0. 078613 |
| CYTL1     | 4p16. 2   | -0. 154884607 | 0. 038433 | 0. 078713 |
| PTTG3P    | 8q13. 1   | 0. 154872427  | 0. 038448 | 0. 078737 |
| EYA1      | 8q13. 3   | -0. 15485966  | 0. 038465 | 0. 078759 |
| GPR4      | 19q13. 32 | -0. 154857406 | 0. 038467 | 0. 078759 |
| NCR3LG1   | 11p15. 1  | -0. 154846944 | 0. 038481 | 0. 078778 |
| ANGEL2    | 1q32. 3   | -0. 154830205 | 0. 038502 | 0. 078814 |
| RFC2      | 7q11. 23  | 0. 154817651  | 0. 038518 | 0. 078836 |
| BLOC1S5   | 6p24. 3   | -0. 154815559 | 0. 038521 | 0. 078836 |
| CXCL13    | 4q21. 1   | -0. 154809363 | 0. 038528 | 0. 078844 |
| CD247     | 1q24. 2   | -0. 154794635 | 0. 038547 | 0. 078874 |
| ENTHD1    | 22q13. 1  | 0. 154734091  | 0. 038624 | 0. 079023 |
| TCEANC2   | 1p32. 3   | -0. 15472768  | 0. 038632 | 0. 079032 |
| RIF1      | 2q23. 3   | -0. 154669094 | 0. 038707 | 0. 079176 |
| ANKRD29   | 18q11. 2  | -0. 154662817 | 0. 038715 | 0. 079185 |

|            |          |              |          |          |
|------------|----------|--------------|----------|----------|
| CAMK2A     | 5q32     | -0.154658794 | 0.03872  | 0.079187 |
| PAXIP1-AS1 | 7q36.2   | -0.154646078 | 0.038736 | 0.079212 |
| NKX3-1     | 8p21.2   | 0.154604231  | 0.038789 | 0.079313 |
| APLNR      | 11q12.1  | -0.154597954 | 0.038797 | 0.079319 |
| NME6       | 3p21.31  | 0.154595861  | 0.0388   | 0.079319 |
| BZW1       | 2q33.1   | 0.154551922  | 0.038856 | 0.079425 |
| GTF2H2B    | 5q13.2   | -0.154547737 | 0.038862 | 0.079428 |
| CECR7      | 22q11.1  | -0.154533414 | 0.03888  | 0.079457 |
| NT5DC1     | 6q22.1   | -0.154520536 | 0.038896 | 0.079483 |
| N4BP1      | 16q12.1  | 0.154466135  | 0.038966 | 0.079617 |
| MCCC1      | 3q27.1   | -0.154457766 | 0.038977 | 0.079631 |
| LOC1547617 | 7q35     | -0.154418011 | 0.039028 | 0.079727 |
| PPCDC      | 15q24.2  | 0.154403365  | 0.039047 | 0.079757 |
| ARHGAP11A  | 15q13.3  | 0.15439918   | 0.039052 | 0.07976  |
| LY9        | 1q23.3   | -0.154384533 | 0.039071 | 0.07979  |
| ACVR1      | 2q24.1   | 0.154380349  | 0.039076 | 0.079793 |
| GNAI3      | 1p13.3   | 0.154369887  | 0.03909  | 0.079793 |
| TRIM4      | 7q22.1   | -0.154369887 | 0.03909  | 0.079793 |
| CPLX2      | 5q35.2   | -0.154367875 | 0.039092 | 0.079793 |
| TOR1AIP2   | 1q25.2   | -0.154367794 | 0.039092 | 0.079793 |
| TSPAN14    | 10q23.1  | 0.154336409  | 0.039133 | 0.079867 |
| PABPC1L    | 20q13.12 | 0.154332224  | 0.039138 | 0.07987  |
| PLK5       | 19p13.3  | 0.154288296  | 0.039194 | 0.079978 |
| SEC61B     | 9q22.33  | -0.154263177 | 0.039227 | 0.080035 |
| SHROOM2    | Xp22.2   | -0.15424853  | 0.039246 | 0.080066 |
| FURIN      | 15q26.1  | -0.154233884 | 0.039265 | 0.080096 |
| AARS       | 16q22.1  | -0.154225514 | 0.039275 | 0.08011  |
| GUSBP2     | 6p22.2   | -0.154197348 | 0.039312 | 0.080176 |
| C10RF43    | 1q21.3   | 0.154189944  | 0.039321 | 0.080187 |
| SCGB2B2    | 19q13.11 | -0.154177756 | 0.039337 | 0.080204 |
| KDM7A      | 7q34     | -0.15417739  | 0.039337 | 0.080204 |
| LENG8      | 19q13.42 | 0.154158559  | 0.039362 | 0.080245 |
| NRDC       | 1p32.3   | -0.154139728 | 0.039386 | 0.080287 |
| ITGA1      | 5q11.2   | -0.154129266 | 0.0394   | 0.080306 |
| C20RF80    | 2q33.3   | -0.154111291 | 0.039423 | 0.080345 |
| KCNC2      | 12q21.1  | -0.154062057 | 0.039487 | 0.080467 |
| CCDC38     | 12q23.1  | -0.154048957 | 0.039504 | 0.080493 |
| ELOC       | 8q21.11  | 0.154043479  | 0.039511 | 0.0805   |
| RNASE7     | 14q11.2  | 0.154030132  | 0.039528 | 0.080527 |
| TENT5D     | Xq21.1   | -0.15399756  | 0.03957  | 0.080597 |
| ZNF12      | 7p22.1   | -0.153997447 | 0.03957  | 0.080597 |
| BTBD8      | 1p22.1   | -0.153953833 | 0.039627 | 0.080704 |
| ARNTL      | 11p15.3  | -0.15392003  | 0.039671 | 0.080785 |
| NKX2-3     | 10q24.2  | -0.153892829 | 0.039706 | 0.080846 |
| TMF1       | 3p14.1   | -0.153890737 | 0.039709 | 0.080846 |
| C16ORF71   | 16p13.3  | -0.153873998 | 0.039731 | 0.08088  |
| PHRF1      | 11p15.5  | 0.153871906  | 0.039734 | 0.08088  |
| COX6A2     | 16p11.2  | -0.153820077 | 0.039801 | 0.081009 |
| CREG1      | 1q24.2   | -0.153781935 | 0.039851 | 0.081102 |
| FAM72A     | 1q32.1   | 0.153742984  | 0.039902 | 0.081197 |
| DIPK1A     | 1p22.1   | -0.153727533 | 0.039922 | 0.081227 |
| CHRD       | 3q27.1   | -0.153725441 | 0.039925 | 0.081227 |
| WASH5P     | 19p13.3  | 0.153691963  | 0.039969 | 0.081308 |
| TMEM81     | 1q32.1   | 0.153666855  | 0.040002 | 0.081367 |

|           |          |              |          |          |
|-----------|----------|--------------|----------|----------|
| ZNF846    | 19p13.2  | 0.153629193  | 0.040051 | 0.081459 |
| EPRS      | 1q41     | -0.153614546 | 0.04007  | 0.08149  |
| PUM2      | 2p24.1   | -0.153608269 | 0.040078 | 0.081498 |
| ITGAL     | 16p11.2  | -0.153585253 | 0.040109 | 0.081551 |
| OMG       | 17q11.2  | 0.153561661  | 0.040139 | 0.081599 |
| BANF2     | 20p12.1  | -0.153561154 | 0.04014  | 0.081599 |
| TMEM144   | 4q32.1   | 0.153553868  | 0.04015  | 0.08161  |
| RPS25     | 11q23.3  | 0.153537129  | 0.040172 | 0.081647 |
| ANKRD65   | 1p36.33  | -0.153532944 | 0.040177 | 0.081649 |
| FXYD1     | 19q13.12 | -0.153505744 | 0.040213 | 0.081714 |
| UQCR11    | 19p13.3  | 0.153495282  | 0.040227 | 0.081734 |
| CCT5      | 5p15.2   | 0.153491097  | 0.040232 | 0.081736 |
| SLIRP     | 14q24.3  | 0.153478543  | 0.040249 | 0.081762 |
| RPUSD3    | 3p25.3   | 0.153442973  | 0.040296 | 0.081849 |
| MS4A3     | 11q12.1  | -0.153400072 | 0.040352 | 0.081955 |
| LINC00588 | 8q12.1   | -0.153353488 | 0.040414 | 0.082068 |
| ADAMTS14  | 10q22.1  | 0.153350909  | 0.040417 | 0.082068 |
| TEPSIN    | 17q25.3  | 0.153348817  | 0.04042  | 0.082068 |
| FAM83D    | 20q11.23 | 0.153340447  | 0.040431 | 0.082082 |
| TSGA10    | 2q11.2   | -0.153313247 | 0.040467 | 0.082146 |
| ARHGEF10L | 1p36.13  | -0.153304877 | 0.040478 | 0.08216  |
| MUC7      | 4q13.3   | -0.153295607 | 0.04049  | 0.082177 |
| FBXO40    | 3q13.33  | -0.153289495 | 0.040498 | 0.082185 |
| PTCD1     | 7q22.1   | 0.153281861  | 0.040508 | 0.082197 |
| SRRT      | 7q22.1   | 0.153277677  | 0.040514 | 0.0822   |
| TMEM51    | 1p36.21  | 0.153248384  | 0.040553 | 0.082271 |
| RSPH9     | 6p21.1   | -0.153240014 | 0.040564 | 0.082285 |
| STIP1     | 11q13.1  | 0.153208629  | 0.040606 | 0.082355 |
| CER1      | 9p22.3   | -0.153207774 | 0.040607 | 0.082355 |
| GATAD1    | 7q21.2   | 0.153202352  | 0.040614 | 0.082361 |
| TAAR8     | 6q23.2   | 0.153184109  | 0.040638 | 0.082398 |
| TLR8      | Xp22.2   | -0.153181428 | 0.040642 | 0.082398 |
| GLCE      | 15q23    | -0.153179336 | 0.040644 | 0.082398 |
| WIPF3     | 7p14.3   | -0.153155354 | 0.040676 | 0.082454 |
| TMEM123   | 11q22.2  | 0.153150043  | 0.040683 | 0.082459 |
| CCN6      | 6q21     | 0.153147142  | 0.040687 | 0.082459 |
| ATP5IF1   | 1p35.3   | 0.153118658  | 0.040725 | 0.082519 |
| S100PBP   | 1p35.1   | -0.153118658 | 0.040725 | 0.082519 |
| GOLPH3L   | 1q21.3   | 0.153097734  | 0.040753 | 0.082567 |
| AEBP1     | 7p13     | 0.153070533  | 0.040789 | 0.082632 |
| LACTB     | 15q22.2  | 0.153062164  | 0.0408   | 0.082647 |
| RFX7      | 15q21.3  | -0.153045425 | 0.040822 | 0.082683 |
| PDE1B     | 12q13.2  | -0.153003578 | 0.040878 | 0.082788 |
| LOC143188 | 10q25.2  | 0.152988931  | 0.040898 | 0.082819 |
| OGFOD1    | 16q13    | 0.152980562  | 0.040909 | 0.082833 |
| TMEM252   | 9q21.11  | -0.152928807 | 0.040978 | 0.082965 |
| ELAVL2    | 9p21.3   | -0.152867409 | 0.04106  | 0.083123 |
| FAM222A-A | 12q24.11 | -0.152823424 | 0.041119 | 0.083234 |
| GHITM     | 10q23.1  | -0.152800619 | 0.04115  | 0.083287 |
| KIRREL3   | 11q24.2  | -0.152790158 | 0.041164 | 0.083304 |
| ITGA11    | 15q23    | 0.152788065  | 0.041167 | 0.083304 |
| C16ORF91  | 16p13.3  | 0.152779696  | 0.041178 | 0.083319 |
| METTL24   | 6q21     | -0.152773499 | 0.041186 | 0.083327 |
| C1QTNF3   | 5p13.2   | 0.152760865  | 0.041203 | 0.083353 |

|          |           |              |          |          |
|----------|-----------|--------------|----------|----------|
| SSPN     | 12p12.1   | -0.15274831  | 0.04122  | 0.083379 |
| ZFP36    | 19q13.2   | 0.152744126  | 0.041226 | 0.083381 |
| CYP3A43  | 7q22.1    | -0.152724463 | 0.041252 | 0.083426 |
| NEMF     | 14q21.3   | -0.152714833 | 0.041265 | 0.083444 |
| KLHL34   | Xp22.12   | -0.152673533 | 0.041321 | 0.083547 |
| DHX38    | 16q22.2   | 0.152670893  | 0.041324 | 0.083547 |
| DNAJC24  | 11p13     | -0.152666709 | 0.04133  | 0.08355  |
| PRORS1P  | 2p16.1    | 0.152662524  | 0.041335 | 0.083553 |
| FCRLA    | 1q23.3    | -0.152651183 | 0.041351 | 0.08357  |
| TLR1     | 4p14      | -0.15264997  | 0.041352 | 0.08357  |
| MFN2     | 1p36.22   | -0.152635323 | 0.041372 | 0.083601 |
| WDR1     | 4p16.1    | 0.152631138  | 0.041378 | 0.083604 |
| SMTNL2   | 17p13.2   | -0.152619383 | 0.041393 | 0.083628 |
| SOCS5    | 2p21      | -0.152580922 | 0.041445 | 0.083724 |
| DPM1     | 20q13.13  | 0.152572552  | 0.041457 | 0.083739 |
| NME3     | 16p13.3   | 0.152568368  | 0.041462 | 0.083742 |
| RPL23    | 17q12     | 0.152547444  | 0.041491 | 0.08379  |
| MORF4L2  | Xq22.2    | -0.152524428 | 0.041522 | 0.083845 |
| CD244    | 1q23.3    | -0.152516059 | 0.041533 | 0.083859 |
| POLR2G   | 11q12.3   | 0.152447011  | 0.041626 | 0.084039 |
| WFIKKN1  | 16p13.3   | -0.152434457 | 0.041643 | 0.084065 |
| RNF186   | 1p36.13   | -0.152416752 | 0.041667 | 0.084105 |
| BNC2     | 9p22.3-p2 | -0.152403072 | 0.041686 | 0.084134 |
| MRPL27   | 17q21.33  | 0.152369594  | 0.041731 | 0.084217 |
| ADAT3    | 19p13.3   | 0.152311008  | 0.041811 | 0.084369 |
| GCK      | 7p13      | -0.152300546 | 0.041825 | 0.084389 |
| PAK6     | 15q15.1   | 0.152292177  | 0.041837 | 0.084404 |
| CKAP2L   | 2q14.1    | 0.152264976  | 0.041874 | 0.08447  |
| SLC22A4  | 5q31.1    | -0.152225221 | 0.041928 | 0.08457  |
| NSA2     | 5q13.3    | -0.152208482 | 0.04195  | 0.084608 |
| AIMP1    | 4q24      | 0.152166635  | 0.042008 | 0.084715 |
| DNASE1L2 | 16p13.3   | 0.152141686  | 0.042042 | 0.084775 |
| NTSR2    | 2p25.1    | -0.152112339 | 0.042082 | 0.084839 |
| SPTBN1   | 2p16.2    | 0.152112234  | 0.042082 | 0.084839 |
| ZNF496   | 1q44      | -0.152095495 | 0.042105 | 0.084876 |
| EFCAB1   | 8q11.21   | 0.152091629  | 0.04211  | 0.084878 |
| COX18    | 4q13.3    | -0.152062017 | 0.042151 | 0.084951 |
| UNC45B   | 17q12     | -0.152056242 | 0.042158 | 0.084952 |
| SS18L1   | 20q13.33  | -0.15205574  | 0.042159 | 0.084952 |
| ACER1    | 19p13.3   | -0.152038394 | 0.042183 | 0.084991 |
| ACR      | 22q13.33  | -0.15201393  | 0.042216 | 0.08505  |
| PDCD1LG2 | 9p24.1    | -0.152003431 | 0.042231 | 0.08507  |
| OR2B2    | 6p22.1    | 0.151980803  | 0.042262 | 0.085124 |
| ENTPD1   | 10q24.1   | -0.151963677 | 0.042285 | 0.085163 |
| MSH3     | 5q14.1    | -0.151936476 | 0.042323 | 0.08523  |
| SH2D4B   | 10q23.1   | 0.151895625  | 0.042379 | 0.085334 |
| VN1R2    | 19q13.42  | -0.151886979 | 0.042391 | 0.085349 |
| NOMO3    | 16p13.11  | -0.151867428 | 0.042418 | 0.085395 |
| HOXC11   | 12q13.13  | 0.151844165  | 0.04245  | 0.085451 |
| CPZ      | 4p16.1    | 0.151825581  | 0.042475 | 0.085494 |
| PAH      | 12q23.2   | -0.151808457 | 0.042499 | 0.085526 |
| TMEM200B | 1p35.3    | 0.15180675   | 0.042501 | 0.085526 |
| LRRK1    | 15q26.3   | -0.151804658 | 0.042504 | 0.085526 |
| DNAJB6   | 7q36.3    | -0.151783734 | 0.042533 | 0.085575 |



|          |           |              |          |          |
|----------|-----------|--------------|----------|----------|
| CTCF     | 16q22.1   | -0.151756533 | 0.04257  | 0.085639 |
| TCEAL3   | Xq22.2    | -0.151754441 | 0.042573 | 0.085639 |
| ABCB11   | 2q31.1    | 0.151731972  | 0.042604 | 0.085693 |
| CA2      | 8q21.2    | 0.151725148  | 0.042614 | 0.085703 |
| ZNF627   | 19p13.2   | -0.151706317 | 0.04264  | 0.085747 |
| UTY      | Yq11.221  | -0.151667586 | 0.042693 | 0.085846 |
| SYT5     | 19q13.42  | -0.151630992 | 0.042744 | 0.085937 |
| MRPS25   | 3p25.1    | 0.1516289    | 0.042747 | 0.085937 |
| SCX      | 8q24.3    | 0.151611738  | 0.042771 | 0.085976 |
| CTSB     | 8p23.1    | 0.151605884  | 0.042779 | 0.085983 |
| PDCD6    | 5p15.33   | 0.151587052  | 0.042805 | 0.086027 |
| NEDD4    | 15q21.3   | -0.151582868 | 0.042811 | 0.08603  |
| MANF     | 3p21.2    | 0.151574498  | 0.042822 | 0.086042 |
| SLC5A3   | 21q22.11  | 0.151572406  | 0.042825 | 0.086042 |
| TUBGCP4  | 15q15.3   | -0.151566129 | 0.042834 | 0.08605  |
| FGD3     | 9q22.31   | -0.151561944 | 0.04284  | 0.08605  |
| SNHG4    | 5q31.2    | 0.151560169  | 0.042842 | 0.08605  |
| IMPDH1   | 7q32.1    | 0.151551482  | 0.042854 | 0.086066 |
| RSKR     | 17q11.2   | 0.151545205  | 0.042863 | 0.086075 |
| ZNF521   | 18q11.2   | -0.151528467 | 0.042886 | 0.086113 |
| LTN1     | 21q21.3   | -0.151522189 | 0.042895 | 0.086122 |
| DAPK2    | 15q22.31  | -0.151503358 | 0.042921 | 0.086165 |
| COL26A1  | 7q22.1    | -0.151448069 | 0.042998 | 0.086311 |
| XG       | Xp22.33   | -0.151425271 | 0.04303  | 0.086366 |
| CYP24A1  | 20q13.2   | 0.151403611  | 0.04306  | 0.086418 |
| NUP133   | 1q42.13   | -0.151392463 | 0.043075 | 0.086441 |
| DMRTA2   | 1p32.3    | 0.15136029   | 0.04312  | 0.086522 |
| SLAMF6   | 1q23.2-q2 | -0.151350616 | 0.043134 | 0.086537 |
| SCUBE1   | 22q13.2   | -0.151348524 | 0.043137 | 0.086537 |
| DSCR8    | 21q22.13  | -0.15131004  | 0.04319  | 0.086637 |
| TNFRSF18 | 1p36.33   | 0.151273199  | 0.043242 | 0.086731 |
| GZMM     | 19p13.3   | -0.151267001 | 0.043251 | 0.08674  |
| MYF6     | 12q21.31  | -0.151234249 | 0.043296 | 0.086823 |
| RSPH14   | 22q11.22- | -0.151210428 | 0.04333  | 0.086872 |
| GAP43    | 3q13.31   | -0.151210428 | 0.04333  | 0.086872 |
| PRIMA1   | 14q32.12  | -0.151181214 | 0.043371 | 0.086937 |
| DNAAF5   | 7p22.3    | 0.151181135  | 0.043371 | 0.086937 |
| ATP5MC3  | 2q31.1    | 0.151166489  | 0.043391 | 0.08697  |
| COX8A    | 11q13.1   | 0.151160212  | 0.0434   | 0.086979 |
| TBL1XR1  | 3q26.32   | 0.151141381  | 0.043427 | 0.087023 |
| P2RX4    | 12q24.31  | -0.151049317 | 0.043556 | 0.087273 |
| CENPV    | 17p11.2   | 0.151013747  | 0.043606 | 0.087365 |
| ARHGAP15 | 2q22.2-q2 | -0.151000225 | 0.043625 | 0.087389 |
| RNF19B   | 1p35.1    | 0.1509991    | 0.043627 | 0.087389 |
| KCNS2    | 8q22.2    | -0.150988996 | 0.043641 | 0.087408 |
| RAD52    | 12p13.33  | -0.150925868 | 0.04373  | 0.087578 |
| MAGED4   | Xp11.22   | -0.150888205 | 0.043783 | 0.087676 |
| AGT      | 1q42.2    | -0.150879836 | 0.043795 | 0.087691 |
| ARVCF    | 22q11.21  | -0.150854728 | 0.04383  | 0.087753 |
| JPH2     | 20q13.12  | 0.150842174  | 0.043848 | 0.08778  |
| TM4SF5   | 17p13.2   | 0.150838304  | 0.043854 | 0.087782 |
| PLAC4    | 21q22.2   | 0.150823085  | 0.043875 | 0.087816 |
| STMN4    | 8p21.2    | -0.150818376 | 0.043882 | 0.087821 |
| ROCK2    | 2p25.1    | -0.150815052 | 0.043887 | 0.087821 |

|           |               |              |          |          |
|-----------|---------------|--------------|----------|----------|
| UAP1L1    | 9q34.3        | -0.150789865 | 0.043922 | 0.087884 |
| TMEM106B  | 7p21.3        | -0.150771033 | 0.043949 | 0.087929 |
| HTRA2     | 2p13.1        | 0.150745925  | 0.043984 | 0.087988 |
| SYCP2     | 20q13.33      | -0.150743833 | 0.043987 | 0.087988 |
| ERBIN     | 5q12.3        | 0.150697801  | 0.044053 | 0.088107 |
| ZNF260    | 19q13.12      | -0.150695709 | 0.044056 | 0.088107 |
| KIR3DL1   | 19q13.42      | -0.150692465 | 0.04406  | 0.088108 |
| CPSF2     | 14q32.12      | -0.150681062 | 0.044077 | 0.088131 |
| WFDC10A   | 20q13.12      | 0.150666717  | 0.044097 | 0.088163 |
| SLC9A6    | Xq26.3        | -0.150655954 | 0.044112 | 0.088185 |
| OR6B3     | 2q37.3        | -0.150647021 | 0.044125 | 0.088201 |
| NAA20     | 20p11.23      | -0.150641307 | 0.044133 | 0.088209 |
| MID1IP1   | Xp11.4        | 0.15059946   | 0.044193 | 0.088319 |
| CD274     | 9p24.1        | -0.150595354 | 0.044198 | 0.088322 |
| LAMP5     | 20p12.2       | 0.150588998  | 0.044208 | 0.088331 |
| RCL1      | 9p24.1        | -0.150576523 | 0.044225 | 0.088358 |
| SLC5A5    | 19p13.11      | 0.150547397  | 0.044267 | 0.088432 |
| SNX1      | 15q22.31      | -0.150538782 | 0.044279 | 0.088448 |
| SERP2     | 13q14.11      | -0.150509489 | 0.044321 | 0.088522 |
| LRRIQ1    | 12q21.31      | -0.150484987 | 0.044356 | 0.088583 |
| GLB1      | 3p22.3        | -0.150480196 | 0.044363 | 0.088588 |
| SIT1      | 9p13.3        | -0.150455088 | 0.044399 | 0.088651 |
| KCNK13    | 14q32.11      | -0.150446718 | 0.044411 | 0.088666 |
| BRINP3    | 1q31.1        | -0.150434578 | 0.044428 | 0.088692 |
| MAPKAPK5  | 12q24.12      | 0.15042161   | 0.044447 | 0.08872  |
| AIPL1     | 17p13.2       | 0.150353667  | 0.044544 | 0.088905 |
| CCNJ      | 10q24.1       | -0.150293976 | 0.044629 | 0.089067 |
| MEMO1     | 2p22.3        | 0.15027933   | 0.04465  | 0.0891   |
| ACYP2     | 2p16.2        | -0.15016425  | 0.044816 | 0.089422 |
| ARFIP1    | 4q31.3        | 0.150143326  | 0.044846 | 0.089473 |
| RABL2B    | 22q13.33      | -0.150101479 | 0.044907 | 0.089585 |
| LVRN      | 5q23.1        | -0.150058195 | 0.044969 | 0.0897   |
| NASP      | 1p34.1        | 0.150036616  | 0.045    | 0.089754 |
| TRA2B     | 3q27.2        | -0.150007323 | 0.045043 | 0.089829 |
| CEMP1     | 16p13.3       | 0.149961291  | 0.045109 | 0.089953 |
| SPIN2A    | Xp11.21       | 0.149955533  | 0.045118 | 0.089961 |
| HMCN1     | 1q25.3-q25.4  | -0.149898521 | 0.0452   | 0.090117 |
| CHCHD6    | 3q21.3        | 0.149885967  | 0.045219 | 0.090144 |
| NDUFA13   | 19p13.11      | 0.149860858  | 0.045255 | 0.090208 |
| SLC9A7    | Xp11.3-Xp11.4 | -0.149850397 | 0.04527  | 0.090229 |
| IDE       | 10q23.33      | -0.149839935 | 0.045285 | 0.090238 |
| CMTM5     | 14q11.2       | -0.149838965 | 0.045287 | 0.090238 |
| FABP12    | 8q21.13       | -0.149837952 | 0.045288 | 0.090238 |
| RNF170    | 8p11.21       | 0.149825288  | 0.045307 | 0.090266 |
| CCNG2     | 4q21.1        | 0.149812734  | 0.045325 | 0.090293 |
| TCP11     | 6p21.31       | 0.14978419   | 0.045366 | 0.090367 |
| ENO2      | 12p13.31      | 0.149760425  | 0.045401 | 0.090427 |
| CCDC122   | 13q14.11      | -0.149720749 | 0.045459 | 0.090521 |
| ADHFE1    | 8q13.1        | -0.14972067  | 0.045459 | 0.090521 |
| WDR4      | 21q22.3       | 0.149718578  | 0.045462 | 0.090521 |
| RNF111    | 15q22.1-q22.2 | -0.149710209 | 0.045474 | 0.090536 |
| DAP3      | 1q22          | 0.149701839  | 0.045486 | 0.090549 |
| LINC00265 | 7p14.1        | 0.149699747  | 0.04549  | 0.090549 |
| SRGN      | 10q22.1       | -0.14969347  | 0.045499 | 0.090558 |

|           |          |              |          |          |
|-----------|----------|--------------|----------|----------|
| THAP10    | 15q23    | -0.149659992 | 0.045548 | 0.090643 |
| ANKRD34C  | 15q25.1  | -0.149658113 | 0.04555  | 0.090643 |
| FGG       | 4q32.1   | 0.149651921  | 0.045559 | 0.090651 |
| GLRX      | 5q15     | -0.149580482 | 0.045664 | 0.09085  |
| PITX3     | 10q24.32 | 0.149527098  | 0.045742 | 0.090997 |
| TGOLN2    | 2p11.2   | -0.149521897 | 0.04575  | 0.091003 |
| ZNF655    | 7q22.1   | -0.149486326 | 0.045802 | 0.091098 |
| LINC00284 | 13q14.11 | -0.149482826 | 0.045807 | 0.091099 |
| CDK11A    | 1p36.33  | 0.149473772  | 0.04582  | 0.091116 |
| GPM6A     | 4q34.2   | -0.149470712 | 0.045825 | 0.091116 |
| FAM124B   | 2q36.2   | -0.149458158 | 0.045843 | 0.091144 |
| CHPT1     | 12q23.2  | 0.149446572  | 0.04586  | 0.091168 |
| TLR10     | 4p14     | -0.149425648 | 0.045891 | 0.09122  |
| CDK6      | 7q21.2   | 0.149408909  | 0.045915 | 0.09126  |
| IL1RL2    | 2q12.1   | -0.14939217  | 0.04594  | 0.0913   |
| SMOC2     | 6q27     | -0.149367062 | 0.045977 | 0.091364 |
| C4ORF48   | 4p16.3   | 0.149340174  | 0.046017 | 0.091432 |
| CD27-AS1  | 12p13.31 | 0.149337769  | 0.04602  | 0.091432 |
| MAPKAP1   | 9q33.3   | -0.149300107 | 0.046076 | 0.09152  |
| RASGRP2   | 11q13.1  | -0.149300107 | 0.046076 | 0.09152  |
| OR51I2    | 11p15.4  | -0.149298496 | 0.046078 | 0.09152  |
| EDEM1     | 3p26.1   | -0.149291737 | 0.046088 | 0.09153  |
| FAM186B   | 12q13.12 | -0.149174643 | 0.046261 | 0.091865 |
| TCF23     | 2p23.3   | -0.149162244 | 0.046279 | 0.091892 |
| C1R       | 12p13.31 | -0.149103425 | 0.046366 | 0.092053 |
| ATP11B    | 3q26.33  | 0.149101333  | 0.04637  | 0.092053 |
| TSEN34    | 19q13.42 | 0.149082502  | 0.046397 | 0.092099 |
| SERPINI2  | 3q26.1   | -0.149063988 | 0.046425 | 0.092145 |
| TAT       | 16q22.2  | -0.149059902 | 0.046431 | 0.092147 |
| UBXN8     | 8p12     | -0.149049024 | 0.046447 | 0.09217  |
| METAP1D   | 2q31.1   | -0.14899253  | 0.046531 | 0.092328 |
| KIF5B     | 10p11.22 | -0.148988346 | 0.046537 | 0.092331 |
| ID2       | 2p25.1   | -0.148977884 | 0.046553 | 0.092353 |
| ARID4B    | 1q42.3   | -0.148969514 | 0.046565 | 0.092368 |
| CCDC92    | 12q24.31 | -0.148963237 | 0.046575 | 0.092377 |
| PHF7      | 3p21.1   | -0.14895696  | 0.046584 | 0.092387 |
| TSNARE1   | 8q24.3   | 0.148933944  | 0.046618 | 0.092446 |
| HNRNPA2B1 | 7p15.2   | 0.14892976   | 0.046625 | 0.092449 |
| FABP3     | 1p35.2   | 0.148910928  | 0.046653 | 0.092495 |
| XPO1      | 2p15     | 0.148906744  | 0.046659 | 0.092498 |
| AP1AR     | 4q25     | -0.148900467 | 0.046668 | 0.092508 |
| CHEK1     | 11q24.2  | 0.148864897  | 0.046721 | 0.092604 |
| NELFB     | 9q34.3   | 0.148860712  | 0.046727 | 0.092607 |
| ALS2      | 2q33.1   | -0.148852342 | 0.04674  | 0.092623 |
| ZNF696    | 8q24.3   | -0.148837696 | 0.046762 | 0.092657 |
| HMGCL     | 1p36.11  | 0.148827234  | 0.046777 | 0.092678 |
| LINC00319 | 21q22.3  | 0.148806622  | 0.046808 | 0.09273  |
| LZTS2     | 10q24.31 | 0.148722616  | 0.046934 | 0.09297  |
| NAT8      | 2p13.1   | -0.1486761   | 0.047004 | 0.093099 |
| SPANXB1   | Xq27.1   | 0.14864686   | 0.047047 | 0.093176 |
| SCARA3    | 8p21.1   | -0.148603352 | 0.047113 | 0.093297 |
| ILDR2     | 1q24.1   | -0.148570502 | 0.047162 | 0.093385 |
| NLRC4     | 2p22.3   | -0.148536397 | 0.047213 | 0.093477 |
| RIPK1     | 6p25.2   | -0.148530119 | 0.047223 | 0.093487 |

|           |           |               |           |           |
|-----------|-----------|---------------|-----------|-----------|
| TNRC18    | 7p22. 1   | 0. 148525935  | 0. 047229 | 0. 09349  |
| SH2D6     | 2p11. 2   | 0. 148516426  | 0. 047243 | 0. 093509 |
| ABCD4     | 14q24. 3  | 0. 148511366  | 0. 047251 | 0. 093515 |
| GGTLC2    | 22q11. 22 | 0. 148498734  | 0. 04727  | 0. 093543 |
| TMSB4Y    | Yq11. 221 | -0. 148478799 | 0. 0473   | 0. 093593 |
| EDEM3     | 1q25. 3   | -0. 148423409 | 0. 047384 | 0. 09375  |
| TUBGCP5   | 15q11. 2  | -0. 148410855 | 0. 047403 | 0. 093775 |
| FOLH1     | 11p11. 12 | -0. 148408763 | 0. 047406 | 0. 093775 |
| TTY15     | Yq11. 221 | -0. 148389926 | 0. 047434 | 0. 093822 |
| UTP18     | 17q21. 33 | -0. 148375285 | 0. 047456 | 0. 093856 |
| PRRC2A    | 6p21. 33  | -0. 148358546 | 0. 047482 | 0. 093897 |
| GPATCH3   | 1p36. 11  | -0. 148345992 | 0. 047501 | 0. 093925 |
| NECAB2    | 16q23. 3  | -0. 148337623 | 0. 047513 | 0. 093941 |
| SUMO2     | 17q25. 1  | 0. 148331346  | 0. 047523 | 0. 09395  |
| ASRGL1    | 11q12. 3  | -0. 148316699 | 0. 047545 | 0. 093985 |
| GPR101    | Xq26. 3   | -0. 14828716  | 0. 04759  | 0. 094064 |
| DDX58     | 9p21. 1   | 0. 148281129  | 0. 047599 | 0. 094073 |
| URAD      | 13q12. 2  | -0. 148263712 | 0. 047625 | 0. 094108 |
| FAM138B   | 2q14. 1   | -0. 148261584 | 0. 047628 | 0. 094108 |
| IER5      | 1q25. 3   | 0. 148260205  | 0. 047631 | 0. 094108 |
| ZNF449    | Xq26. 3   | -0. 148239282 | 0. 047662 | 0. 094161 |
| PLN       | 6q22. 31  | -0. 148220451 | 0. 047691 | 0. 094208 |
| MGME1     | 20p11. 23 | 0. 148195342  | 0. 047729 | 0. 094274 |
| MAGEA3    | Xq28      | 0. 148160179  | 0. 047782 | 0. 094362 |
| GFAP      | 17q21. 31 | -0. 14815985  | 0. 047783 | 0. 094362 |
| RUNX1     | 21q22. 12 | 0. 148151403  | 0. 047796 | 0. 094378 |
| CD63      | 12q13. 2  | 0. 148099094  | 0. 047875 | 0. 094526 |
| ISOC1     | 5q23. 3   | -0. 148076078 | 0. 04791  | 0. 09458  |
| TEX11     | Xq13. 1   | -0. 148074911 | 0. 047912 | 0. 09458  |
| USP9Y     | Yq11. 221 | -0. 148066781 | 0. 047925 | 0. 094586 |
| RPE65     | 1p31. 3   | -0. 148064019 | 0. 047929 | 0. 094586 |
| CD69      | 12p13. 31 | -0. 148063524 | 0. 04793  | 0. 094586 |
| ALG13     | Xq23      | -0. 148046785 | 0. 047955 | 0. 094627 |
| PCCB      | 3q22. 3   | -0. 148025862 | 0. 047987 | 0. 094681 |
| NOX4      | 11q14. 3  | 0. 14800703   | 0. 048016 | 0. 094728 |
| ANKRD35   | 1q21. 1   | 0. 147996569  | 0. 048032 | 0. 09475  |
| ANP32B    | 9q22. 33  | 0. 147986107  | 0. 048048 | 0. 094772 |
| KIF26B    | 1q44      | 0. 147960998  | 0. 048086 | 0. 094839 |
| BDNF-AS   | 11p14. 1  | -0. 147942167 | 0. 048115 | 0. 094886 |
| ARGLU1    | 13q33. 3  | 0. 147883581  | 0. 048204 | 0. 095048 |
| TNFSF15   | 9q32      | -0. 147882262 | 0. 048206 | 0. 095048 |
| ARHGEF3   | 3p14. 3   | -0. 147799887 | 0. 048333 | 0. 095288 |
| BASP1-AS1 | 5p15. 1   | -0. 147795674 | 0. 048339 | 0. 095291 |
| CALML3    | 10p15. 1  | -0. 147773115 | 0. 048374 | 0. 09535  |
| SYN2      | 3p25. 2   | -0. 147716193 | 0. 048461 | 0. 095513 |
| FOLR1     | 11q13. 4  | 0. 147705808  | 0. 048477 | 0. 095535 |
| AWAT1     | Xq13. 1   | -0. 147679693 | 0. 048517 | 0. 095605 |
| MIA2      | 14q13. 2  | -0. 147660008 | 0. 048548 | 0. 095655 |
| TF        | 3q22. 1   | -0. 147647145 | 0. 048568 | 0. 095685 |
| DNER      | 2q36. 3   | -0. 147632498 | 0. 04859  | 0. 09572  |
| MYBPC3    | 11p11. 2  | 0. 147622758  | 0. 048605 | 0. 09574  |
| TMED10    | 14q24. 3  | -0. 147603205 | 0. 048635 | 0. 09579  |
| TSEN54    | 17q25. 1  | 0. 14758019   | 0. 048671 | 0. 09585  |
| LOC541473 | 7q11. 23  | 0. 147512685  | 0. 048775 | 0. 096046 |

|           |            |              |          |          |
|-----------|------------|--------------|----------|----------|
| CABLES1   | 18q11.2    | 0.147502772  | 0.04879  | 0.096067 |
| HCG11     | 6p22.2     | -0.147490218 | 0.04881  | 0.096092 |
| ALDH16A1  | 19q13.33   | 0.147488126  | 0.048813 | 0.096092 |
| BRD1      | 22q13.33   | -0.147471387 | 0.048839 | 0.096134 |
| MAGEB4    | Xp21.2     | -0.147444748 | 0.04888  | 0.096206 |
| PHYHD1    | 9q34.11    | 0.147400247  | 0.048949 | 0.096332 |
| C6ORF47   | 6p21.33    | 0.147387693  | 0.048969 | 0.096361 |
| SMC5      | 9q21.12    | -0.147341661 | 0.04904  | 0.096492 |
| ZNF256    | 19q13.43   | -0.147316553 | 0.049079 | 0.096559 |
| IARS2     | 1q41       | 0.147312368  | 0.049086 | 0.096563 |
| TPSD1     | 16p13.3    | -0.14729993  | 0.049105 | 0.096591 |
| ZNF692    | 1q44       | 0.147285167  | 0.049128 | 0.096622 |
| UGT2B11   | 4q13.2     | -0.147283486 | 0.049131 | 0.096622 |
| FMR1NB    | Xq27.3-q28 | -0.147276124 | 0.049142 | 0.096635 |
| SLC39A12  | 10p12.33   | -0.147270977 | 0.04915  | 0.096642 |
| EFCC1     | 3q21.3     | -0.147257967 | 0.04917  | 0.096672 |
| GBA2      | 9p13.3     | -0.147239135 | 0.0492   | 0.09672  |
| PCDHGA4   | 5q31.3     | -0.147174272 | 0.049301 | 0.096909 |
| EPHA3     | 3p11.1     | -0.147167995 | 0.049311 | 0.096919 |
| TCP11L1   | 11p13      | -0.147159626 | 0.049324 | 0.096932 |
| RSRC1     | 3q25.32    | -0.147157534 | 0.049327 | 0.096932 |
| GLUL      | 1q25.3     | -0.147149164 | 0.04934  | 0.096948 |
| CCR6      | 6q27       | -0.147138702 | 0.049356 | 0.096971 |
| NPEPL1    | 20q13.32   | 0.147132425  | 0.049366 | 0.09698  |
| EPHX3     | 19p13.12   | 0.147111502  | 0.049399 | 0.097035 |
| BAG1      | 9p13.3     | 0.147078024  | 0.049451 | 0.097128 |
| HAT1      | 2q31.1     | -0.14702153  | 0.049539 | 0.097293 |
| KRT12     | 17q21.2    | 0.147011805  | 0.049555 | 0.097302 |
| ABCE1     | 4q31.21    | -0.147011069 | 0.049556 | 0.097302 |
| ADAT1     | 16q23.1    | -0.147008976 | 0.049559 | 0.097302 |
| LINC00705 | 10p15.1    | 0.146994802  | 0.049581 | 0.097337 |
| LINC01020 | 5p15.32    | 0.146954035  | 0.049645 | 0.097452 |
| GRPEL1    | 4p16.1     | 0.146944113  | 0.049661 | 0.097473 |
| DDX5      | 17q23.3    | -0.14691482  | 0.049707 | 0.097554 |
| GPD2      | 2q24.1     | 0.146906451  | 0.04972  | 0.097555 |
| CCDC113   | 16q21      | -0.146905481 | 0.049722 | 0.097555 |
| LOC400710 | 19q13.33   | -0.146905364 | 0.049722 | 0.097555 |
| VGF       | 7q22.1     | -0.146833218 | 0.049835 | 0.097764 |
| FAM226B   | Xq13.1     | -0.146831126 | 0.049838 | 0.097764 |
| PSMD3     | 17q21.1    | 0.146783002  | 0.049914 | 0.097904 |
| TRAPPC13  | 5q12.3     | -0.146749524 | 0.049967 | 0.097997 |
| FIRRE     | Xq26.2     | 0.146745137  | 0.049974 | 0.098001 |
| ZFY       | Yp11.2     | -0.146735676 | 0.049989 | 0.098021 |
| CT62      | 15q23      | 0.146717124  | 0.050018 | 0.098069 |
| FOS       | 14q24.3    | 0.14663026   | 0.050156 | 0.098328 |
| CILP      | 15q22.31   | -0.146605151 | 0.050195 | 0.098394 |
| CP        | 3q24-q25   | 0.146603059  | 0.050199 | 0.098394 |
| OR10V1    | 11q12.1    | -0.146575129 | 0.050243 | 0.098471 |
| NEIL1     | 15q24.2    | 0.146544473  | 0.050291 | 0.098556 |
| TAF6      | 7q22.1     | 0.146540288  | 0.050298 | 0.09856  |
| SEC31A    | 4q21.22    | -0.146523549 | 0.050325 | 0.098602 |
| CCT2      | 12q15      | -0.146510995 | 0.050345 | 0.098631 |
| GLO1      | 6p21.2     | -0.146496349 | 0.050368 | 0.098664 |
| PI4K2B    | 4p15.2     | -0.146494256 | 0.050371 | 0.098664 |

|            |           |              |          |          |
|------------|-----------|--------------|----------|----------|
| PDK1       | 2q31.1    | 0.146487979  | 0.050381 | 0.098674 |
| RNASE9     | 14q11.2   | 0.146478064  | 0.050397 | 0.098695 |
| EXOSC4     | 8q24.3    | 0.146454502  | 0.050434 | 0.098759 |
| FHOD3      | 18q12.2   | 0.146427301  | 0.050478 | 0.09882  |
| TMX1       | 14q22.1   | -0.146427301 | 0.050478 | 0.09882  |
| PPAN-P2RY1 | 19p13.2   | -0.146425614 | 0.05048  | 0.09882  |
| KCNIP4     | 4p15.31-1 | -0.146347792 | 0.050604 | 0.099053 |
| PELI2      | 14q22.3   | -0.146331053 | 0.050631 | 0.099095 |
| AKAP8L     | 19p13.12  | 0.146326868  | 0.050638 | 0.099097 |
| CDH7       | 18q22.1   | -0.146324153 | 0.050642 | 0.099097 |
| ARMC9      | 2q37.1    | 0.146270374  | 0.050728 | 0.099256 |
| HOXD11     | 2q31.1    | 0.146254291  | 0.050753 | 0.099296 |
| CDKN3      | 14q22.2   | 0.146218065  | 0.050811 | 0.0994   |
| LRCH4      | 7q22.1    | 0.146213881  | 0.050818 | 0.099403 |
| HIST1H2BM  | 6p22.1    | 0.146185352  | 0.050864 | 0.099483 |
| SHOC1      | 9q31.3    | 0.146173142  | 0.050883 | 0.099511 |
| RAB6A      | 11q13.4   | 0.146146925  | 0.050925 | 0.099574 |
| MIR99AHG   | 21q21.1   | -0.146146925 | 0.050925 | 0.099574 |
| GLDC       | 9p24.1    | -0.146142817 | 0.050932 | 0.099577 |
| ACTRT3     | 3q26.2    | 0.146136463  | 0.050942 | 0.099587 |
| MS4A4A     | 11q12.2   | -0.146123909 | 0.050962 | 0.099617 |
| CTSZ       | 20q13.32  | 0.146119725  | 0.050969 | 0.09962  |
| NSUN5P1    | 7q11.23   | 0.146082062  | 0.051029 | 0.099729 |
| CYP2A13    | 19q13.2   | 0.14607767   | 0.051036 | 0.099733 |
| LOC100130  | 1q43      | -0.146050189 | 0.051081 | 0.099809 |
| OLFML1     | 11p15.4   | -0.146033938 | 0.051107 | 0.099847 |
| RBM38      | 20q13.31  | -0.146031846 | 0.05111  | 0.099847 |
| POU3F3     | 2q12.1    | -0.145981948 | 0.05119  | 0.099994 |
| KCTD10     | 12q24.11  | -0.145977444 | 0.051198 | 0.099999 |
| GP5        | 3q29      | -0.145972351 | 0.051206 | 0.100005 |
| SDHAF1     | 19q13.12  | 0.14596489   | 0.051218 | 0.100019 |
| UVSSA      | 4p16.3    | 0.145920951  | 0.051289 | 0.100147 |
| RAB43      | 3q21.3    | 0.145910489  | 0.051305 | 0.10017  |
| ZC2HC1C    | 14q24.3   | -0.145900027 | 0.051322 | 0.100174 |
| ZNF324B    | 19q13.43  | -0.145900027 | 0.051322 | 0.100174 |
| GSTT2      | 22q11.23  | -0.145900027 | 0.051322 | 0.100174 |
| DPY19L2    | 12q14.2   | -0.145874919 | 0.051363 | 0.100243 |
| COL10A1    | 6q22.1    | 0.145826795  | 0.051441 | 0.100382 |
| VPS35      | 16q11.2   | 0.145824702  | 0.051444 | 0.100382 |
| PSMD11     | 17q11.2   | 0.145791225  | 0.051498 | 0.100478 |
| IP6K2      | 3p21.31   | 0.14578704   | 0.051505 | 0.100478 |
| HNRNPR     | 1p36.12   | -0.145784948 | 0.051508 | 0.100478 |
| IKBKE      | 1q32.1    | 0.145778671  | 0.051518 | 0.100488 |
| CAPN6      | Xq23      | -0.145764024 | 0.051542 | 0.100524 |
| RDH5       | 12q13.2   | 0.145757747  | 0.051552 | 0.100524 |
| ZCCHC14    | 16q24.2   | -0.145757747 | 0.051552 | 0.100524 |
| ANKS1A     | 6p21.31   | -0.145749378 | 0.051566 | 0.100541 |
| MMP24      | 20q11.22  | -0.145717992 | 0.051617 | 0.10063  |
| CD3E       | 11q23.3   | -0.145665683 | 0.051702 | 0.100786 |
| KATNA1     | 6q25.1    | -0.145640575 | 0.051742 | 0.100846 |
| SNRNP70    | 19q13.33  | 0.145640575  | 0.051742 | 0.100846 |
| OMD        | 9q22.31   | -0.145555911 | 0.05188  | 0.101104 |
| VWC2       | 7p12.2    | -0.14555002  | 0.05189  | 0.101113 |
| HBP1       | 7q22.3    | -0.14553805  | 0.051909 | 0.101138 |

|          |           |              |          |          |
|----------|-----------|--------------|----------|----------|
| ETNK1    | 12p12.1   | -0.145535957 | 0.051912 | 0.101138 |
| CCDC155  | 19q13.33  | -0.145502111 | 0.051968 | 0.101233 |
| FAM205A  | 9p13.3    | -0.145499848 | 0.051971 | 0.101233 |
| CXORF56  | Xq24      | -0.145496202 | 0.051977 | 0.101234 |
| C12ORF45 | 12q23.3   | 0.145477371  | 0.052008 | 0.101284 |
| CYP3A7   | 7q22.1    | 0.145465121  | 0.052028 | 0.101301 |
| CDC42BPA | 1q42.13   | 0.145464817  | 0.052028 | 0.101301 |
| CCDC189  | 16p11.2   | 0.145462725  | 0.052032 | 0.101301 |
| MEOX2    | 7p21.2    | -0.145408628 | 0.05212  | 0.101463 |
| SLC06A1  | 5q21.1    | -0.145394129 | 0.052144 | 0.101498 |
| ITM2B    | 13q14.2   | 0.145391585  | 0.052148 | 0.101498 |
| OSGIN2   | 8q21.3    | -0.145347645 | 0.05222  | 0.101628 |
| BICRA    | 19q13.33  | 0.145335091  | 0.05224  | 0.101658 |
| ELMOD2   | 4q31.1    | -0.145328814 | 0.052251 | 0.101658 |
| FGF11    | 17p13.1   | 0.145328814  | 0.052251 | 0.101658 |
| AACS     | 12q24.31  | -0.145318352 | 0.052268 | 0.101682 |
| CCNG1    | 5q34      | -0.145314167 | 0.052275 | 0.101685 |
| TRAPPC12 | 2p25.3    | 0.145259766  | 0.052364 | 0.101849 |
| ANXA9    | 1q21.3    | 0.145255581  | 0.052371 | 0.101852 |
| CDV3     | 3q22.1    | -0.145192811 | 0.052474 | 0.102033 |
| LT01     | 11q13.3   | 0.145192811  | 0.052474 | 0.102033 |
| NINJ2    | 12p13.33  | 0.145167702  | 0.052515 | 0.102103 |
| AQP3     | 9p13.3    | -0.145136317 | 0.052567 | 0.102193 |
| CT45A2   | Xq26.3    | 0.145115242  | 0.052601 | 0.102251 |
| HS3ST4   | 16p12.1   | -0.145111872 | 0.052607 | 0.102252 |
| PCDH11Y  | Yp11.2    | -0.145095593 | 0.052634 | 0.102294 |
| IRGQ     | 19q13.31  | -0.145090285 | 0.052642 | 0.102301 |
| TLE3     | 15q23     | 0.145042161  | 0.052722 | 0.102442 |
| NAT1     | 8p22      | 0.145037976  | 0.052729 | 0.102442 |
| EFHB     | 3p24.3    | -0.145033931 | 0.052735 | 0.102442 |
| STRADB   | 2q33.1    | -0.145033792 | 0.052736 | 0.102442 |
| ARID4A   | 14q23.1   | -0.145027514 | 0.052746 | 0.102452 |
| BEND6    | 6p12.1    | -0.14502333  | 0.052753 | 0.102452 |
| PCNT     | 21q22.3   | -0.145021237 | 0.052756 | 0.102452 |
| MGC12916 | 17p12     | -0.145006591 | 0.05278  | 0.102479 |
| NUDCD3   | 7p13      | 0.145006591  | 0.05278  | 0.102479 |
| KCNQ1    | 11p15.5-1 | 0.144983575  | 0.052818 | 0.102543 |
| GTF3A    | 13q12.2   | 0.144960559  | 0.052856 | 0.102607 |
| FTHL17   | Xp21.2    | -0.144933523 | 0.052901 | 0.102684 |
| DLL4     | 15q15.1   | -0.144893604 | 0.052967 | 0.102802 |
| TTLL5    | 14q24.3   | 0.14487268   | 0.053002 | 0.102859 |
| SGSM3    | 22q13.1   | 0.144862218  | 0.053019 | 0.102883 |
| YWHAB    | 20q13.12  | 0.144849664  | 0.05304  | 0.102913 |
| ZNF442   | 19p13.2   | -0.144820371 | 0.053089 | 0.102998 |
| RPL18    | 19q13.33  | 0.144809909  | 0.053106 | 0.103021 |
| CCR1     | 3p21.31   | -0.14480154  | 0.05312  | 0.10303  |
| PYY2     | 17q11.2   | -0.144798051 | 0.053126 | 0.10303  |
| DSG1     | 18q12.1   | -0.144795145 | 0.05313  | 0.10303  |
| SNORA57  | 11q12.3   | 0.144794885  | 0.053131 | 0.10303  |
| ATF6B    | 6p21.32   | 0.144788986  | 0.053141 | 0.103039 |
| FRYL     | 4p11      | -0.144778524 | 0.053158 | 0.103052 |
| KLHL6    | 3q27.1    | -0.144778524 | 0.053158 | 0.103052 |
| TAS2R8   | 12p13.2   | -0.144751665 | 0.053203 | 0.103129 |
| CYP4F8   | 19p13.12  | 0.144729404  | 0.05324  | 0.103181 |

|            |           |               |           |           |
|------------|-----------|---------------|-----------|-----------|
| KRT39      | 17q21. 2  | -0. 144729269 | 0. 05324  | 0. 103181 |
| CYP2C8     | 10q23. 33 | -0. 144705292 | 0. 05328  | 0. 103248 |
| LRRC6      | 8q24. 22  | 0. 144657167  | 0. 05336  | 0. 10339  |
| PDCD7      | 15q22. 31 | -0. 144655075 | 0. 053363 | 0. 10339  |
| RNF217-AS6 | 6q22. 31  | -0. 144646784 | 0. 053377 | 0. 103407 |
| VPS39      | 15q15. 1  | -0. 144638336 | 0. 053391 | 0. 103424 |
| ATP1B1     | 1q24. 2   | 0. 14462369   | 0. 053416 | 0. 103462 |
| KRT85      | 12q13. 13 | -0. 144614916 | 0. 05343  | 0. 103475 |
| CHORDC1    | 11q14. 3  | -0. 144613228 | 0. 053433 | 0. 103475 |
| GPR137     | 11q13. 1  | 0. 144596489  | 0. 053461 | 0. 103519 |
| GTF2IRD2   | 7q11. 23  | -0. 144569288 | 0. 053507 | 0. 103597 |
| OTOP2      | 17q25. 1  | 0. 144552964  | 0. 053534 | 0. 103636 |
| RDH8       | 19p13. 2  | -0. 144551252 | 0. 053537 | 0. 103636 |
| IFIT2      | 10q23. 31 | 0. 14454418   | 0. 053548 | 0. 103648 |
| MARK4      | 19q13. 32 | 0. 144525349  | 0. 05358  | 0. 103699 |
| EXOC1L     | 4q12      | 0. 144504876  | 0. 053614 | 0. 103755 |
| NXPH2      | 2q22. 1   | -0. 14440379  | 0. 053783 | 0. 104073 |
| C12ORF74   | 12q22     | -0. 144383695 | 0. 053817 | 0. 104128 |
| IL17RD     | 3p14. 3   | -0. 14436633  | 0. 053846 | 0. 104174 |
| KDM5C      | Xp11. 22  | -0. 144345406 | 0. 053881 | 0. 104232 |
| HIBCH      | 2q32. 2   | 0. 144288913  | 0. 053976 | 0. 104406 |
| SPATA20    | 17q21. 33 | 0. 14425962   | 0. 054026 | 0. 104491 |
| PRAMEF6    | 1p36. 21  | -0. 144244058 | 0. 054052 | 0. 104529 |
| AP3B1      | 5q14. 1   | -0. 144238696 | 0. 054061 | 0. 104529 |
| RPL15      | 3p24. 2   | -0. 144238696 | 0. 054061 | 0. 104529 |
| DEF8       | 16q24. 3  | -0. 144232419 | 0. 054071 | 0. 104539 |
| RAB35      | 12q24. 23 | -0. 144226142 | 0. 054082 | 0. 104546 |
| CD2        | 1p13. 1   | -0. 14422405  | 0. 054086 | 0. 104546 |
| CCT3       | 1q22      | 0. 144213588  | 0. 054103 | 0. 10457  |
| NANOS3     | 19p13. 12 | 0. 144210525  | 0. 054108 | 0. 10457  |
| F11        | 4q35. 2   | -0. 144205076 | 0. 054118 | 0. 104578 |
| TRMT2B     | Xq22. 1   | -0. 144163371 | 0. 054188 | 0. 104693 |
| ZNF670     | 1q44      | -0. 144163371 | 0. 054188 | 0. 104693 |
| ARHGAP11E  | 15q13. 2  | 0. 14412586   | 0. 054251 | 0. 104803 |
| VTI1A      | 10q25. 2  | 0. 144123616  | 0. 054255 | 0. 104803 |
| PLXNB1     | 3p21. 31  | 0. 144098508  | 0. 054297 | 0. 104875 |
| FUT8-AS1   | 14q23. 3  | 0. 144092231  | 0. 054308 | 0. 104885 |
| NOP53      | 19q13. 33 | 0. 144071308  | 0. 054343 | 0. 104943 |
| SIGLEC11   | 19q13. 33 | -0. 14405569  | 0. 05437  | 0. 104984 |
| ADI1       | 2p25. 3   | 0. 144031553  | 0. 054411 | 0. 10505  |
| ZNF747     | 16p11. 2  | -0. 14402946  | 0. 054414 | 0. 10505  |
| SLC24A5    | 15q21. 1  | -0. 144020927 | 0. 054429 | 0. 105067 |
| E4F1       | 16p13. 3  | 0. 143939489  | 0. 054567 | 0. 105324 |
| CRAMP1     | 16p13. 3  | -0. 14393112  | 0. 054581 | 0. 105341 |
| DENND1C    | 19p13. 3  | -0. 143924843 | 0. 054592 | 0. 105351 |
| NAXE       | 1q22      | 0. 143920658  | 0. 054599 | 0. 105355 |
| ZNF707     | 8q24. 3   | 0. 143882995  | 0. 054663 | 0. 105465 |
| RASGRF1    | 15q25. 1  | -0. 143880903 | 0. 054666 | 0. 105465 |
| TMEM186    | 16p13. 2  | 0. 143876718  | 0. 054673 | 0. 105468 |
| GAGE2B     | Xp11. 23  | -0. 143862564 | 0. 054697 | 0. 105501 |
| SMC1B      | 22q13. 31 | -0. 143860544 | 0. 054701 | 0. 105501 |
| BTNL9      | 5q35. 3   | -0. 143841148 | 0. 054734 | 0. 105554 |
| SNCAIP     | 5q23. 2   | -0. 143778378 | 0. 054841 | 0. 10575  |
| OR3A3      | 17p13. 2  | -0. 143762895 | 0. 054867 | 0. 105791 |



|           |           |              |          |          |
|-----------|-----------|--------------|----------|----------|
| CHIT1     | 1q32.1    | 0.143757454  | 0.054876 | 0.105799 |
| DCANP1    | 5q31.1    | -0.143745483 | 0.054897 | 0.105828 |
| GZMA      | 5q11.2    | -0.143732346 | 0.054919 | 0.105861 |
| LAMA2     | 6q22.33   | -0.14366539  | 0.055034 | 0.106071 |
| SLC35A5   | 3q13.2    | -0.143634005 | 0.055087 | 0.106164 |
| HIST2H3C  | 1q21.2    | 0.143624328  | 0.055104 | 0.106186 |
| ATAD3B    | 1p36.33   | 0.143610989  | 0.055127 | 0.10622  |
| SLC25A51F | 6q12      | -0.143605175 | 0.055137 | 0.106229 |
| NLRP5     | 19q13.43  | -0.143591551 | 0.05516  | 0.106263 |
| LINC0241E | 12q24.33  | -0.143576548 | 0.055186 | 0.106303 |
| KHDRBS3   | 8q24.23   | -0.143569142 | 0.055198 | 0.106317 |
| KLHL18    | 3p21.31   | -0.143564957 | 0.055205 | 0.10632  |
| C2CD3     | 11q13.4   | -0.143546126 | 0.055238 | 0.106366 |
| LINC00244 | 7q36.3    | 0.143543833  | 0.055242 | 0.106366 |
| RPS27A    | 2p16.1    | 0.143541941  | 0.055245 | 0.106366 |
| DHRS4-AS1 | 11q11.2   | -0.143535664 | 0.055256 | 0.106376 |
| RPS24     | 10q22.3   | 0.143518925  | 0.055284 | 0.106421 |
| EYA4      | 6q23.2    | -0.143468413 | 0.055371 | 0.106578 |
| CYTIP     | 2q24.1    | -0.143361999 | 0.055554 | 0.10692  |
| USP15     | 12q14.1   | -0.143355722 | 0.055565 | 0.10693  |
| ESR2      | 14q23.2-c | -0.14333689  | 0.055597 | 0.106982 |
| WDR6      | 3p21.31   | -0.143313874 | 0.055637 | 0.107048 |
| LYPD1     | 2q21.2    | 0.143297136  | 0.055666 | 0.107087 |
| LRP3      | 19q13.11  | -0.143292951 | 0.055673 | 0.107087 |
| RAD51AP1  | 12p13.32  | 0.143292951  | 0.055673 | 0.107087 |
| HPS3      | 3q24      | 0.143282489  | 0.055691 | 0.107111 |
| GIPC2     | 1p31.1    | 0.143276212  | 0.055702 | 0.107122 |
| ZPLD1     | 3q12.3    | 0.143261269  | 0.055728 | 0.107161 |
| BIN2      | 12q13.13  | -0.143255288 | 0.055738 | 0.107167 |
| NTF3      | 12p13.31  | 0.143253196  | 0.055742 | 0.107167 |
| OR1L8     | 9q33.2    | -0.143242012 | 0.055761 | 0.107194 |
| EVI2A     | 17q11.2   | -0.143221811 | 0.055796 | 0.107251 |
| RBFOX2    | 22q12.3   | -0.14320298  | 0.055829 | 0.107303 |
| MAPK11    | 22q13.33  | -0.143192518 | 0.055847 | 0.107328 |
| ABHD16A   | 6p21.33   | -0.143152763 | 0.055916 | 0.10745  |
| HRC       | 19q13.33  | -0.143138191 | 0.055941 | 0.107488 |
| ST3GAL1   | 8q24.22   | 0.143110916  | 0.055988 | 0.107568 |
| MMP12     | 11q22.2   | 0.143106731  | 0.055995 | 0.107572 |
| LTA4H     | 12q23.1   | -0.143064884 | 0.056068 | 0.107701 |
| CTF1      | 16p11.2   | 0.143054422  | 0.056086 | 0.107726 |
| PEG3-AS1  | 19q13.43  | -0.143046992 | 0.056099 | 0.10774  |
| ACOT7     | 1p36.31   | 0.14304396   | 0.056104 | 0.10774  |
| PXDNL     | 8q11.22-c | 0.142995836  | 0.056188 | 0.10789  |
| CD79B     | 17q23.3   | -0.14298119  | 0.056213 | 0.107918 |
| CYP51A1   | 7q21.2    | 0.14298119   | 0.056213 | 0.107918 |
| OR5M1     | 11q12.1   | -0.142943168 | 0.056279 | 0.108032 |
| GJD2      | 15q14     | -0.142940936 | 0.056283 | 0.108032 |
| PCOTH     | 13q12.12  | 0.142889126  | 0.056374 | 0.108195 |
| PEX7      | 6q23.3    | -0.142882849 | 0.056385 | 0.108202 |
| FKBP2     | 11q13.1   | 0.142880757  | 0.056388 | 0.108202 |
| C10RF105  | 1q24.3    | 0.142865086  | 0.056416 | 0.108244 |
| LINC01777 | 1p36.32   | -0.142855299 | 0.056433 | 0.108266 |
| SPATA22   | 17p13.2   | -0.142838568 | 0.056462 | 0.108307 |
| GNAS      | 20q13.32  | -0.142836817 | 0.056465 | 0.108307 |

|           |            |               |           |           |
|-----------|------------|---------------|-----------|-----------|
| MCM9      | 6q22. 31   | -0. 142813801 | 0. 056505 | 0. 108364 |
| ZBTB3     | 11q12. 3   | -0. 142813801 | 0. 056505 | 0. 108364 |
| OFD1      | Xp22. 2    | 0. 142761492  | 0. 056597 | 0. 108529 |
| TRAP1     | 16p13. 3   | 0. 142755215  | 0. 056608 | 0. 108539 |
| VPS50     | 7q21. 2-q2 | -0. 142725922 | 0. 056659 | 0. 108617 |
| LURAP1L   | 9p23       | 0. 142725922  | 0. 056659 | 0. 108617 |
| ANKLE2    | 12q24. 33  | 0. 142692445  | 0. 056717 | 0. 108715 |
| FGD4      | 12p11. 21  | 0. 142690352  | 0. 056721 | 0. 108715 |
| GRWD1     | 19q13. 33  | 0. 142677798  | 0. 056743 | 0. 108747 |
| ZNF252P-A | 8q24. 3    | 0. 142633859  | 0. 05682  | 0. 108884 |
| MRPS15    | 1p34. 3    | 0. 142629674  | 0. 056827 | 0. 108888 |
| ZNF653    | 19p13. 2   | 0. 142585734  | 0. 056905 | 0. 109025 |
| ASCL3     | 11p15. 4   | 0. 142519379  | 0. 057021 | 0. 109238 |
| GTF2H5    | 6q25. 3    | -0. 142495763 | 0. 057063 | 0. 109308 |
| GBX1      | 7q36. 1    | -0. 142492058 | 0. 057069 | 0. 10931  |
| LGR5      | 12q21. 1   | 0. 142476932  | 0. 057096 | 0. 10935  |
| NROB1     | Xp21. 2    | -0. 142455352 | 0. 057134 | 0. 109411 |
| FAHD1     | 16p13. 3   | 0. 142449731  | 0. 057144 | 0. 109411 |
| PPP2R5E   | 14q23. 2   | -0. 142449731 | 0. 057144 | 0. 109411 |
| OR1K1     | 9q33. 2    | -0. 142437818 | 0. 057165 | 0. 10944  |
| TMEM222   | 1p36. 11   | 0. 142418346  | 0. 057199 | 0. 109496 |
| GLS       | 2q32. 2    | -0. 142399515 | 0. 057233 | 0. 109549 |
| KLHDC2    | 14q21. 3   | -0. 142391145 | 0. 057247 | 0. 109567 |
| RPF1      | 1p22. 3    | 0. 142336744  | 0. 057343 | 0. 10974  |
| FOXJ2     | 12p13. 31  | -0. 142332559 | 0. 057351 | 0. 109744 |
| STEAP4    | 7q21. 12   | -0. 14232419  | 0. 057366 | 0. 109761 |
| ASCL4     | 12q23. 3   | -0. 142300235 | 0. 057408 | 0. 109824 |
| C17ORF47  | 17q22      | 0. 142299454  | 0. 057409 | 0. 109824 |
| STAU1     | 20q13. 13  | 0. 142259327  | 0. 057481 | 0. 109948 |
| CADM2     | 3p12. 1    | -0. 142256572 | 0. 057485 | 0. 109948 |
| RFX5      | 1q21. 3    | -0. 142240495 | 0. 057514 | 0. 109992 |
| DGKI      | 7q33       | -0. 142235339 | 0. 057523 | 0. 109999 |
| PRKRIP1   | 7q22. 1    | 0. 142227941  | 0. 057536 | 0. 11     |
| HLA-DRA   | 6p21. 32   | -0. 142225849 | 0. 05754  | 0. 11     |
| LRCH1     | 13q14. 13- | 0. 142225849  | 0. 05754  | 0. 11     |
| NMT2      | 10p13      | -0. 142194464 | 0. 057596 | 0. 110096 |
| PROS1     | 3q11. 1    | -0. 142175632 | 0. 057629 | 0. 110149 |
| ANKLE1    | 19p13. 11  | -0. 142171522 | 0. 057636 | 0. 110153 |
| MAGOH     | 1p32. 3    | 0. 142167263  | 0. 057644 | 0. 110157 |
| SYCP2L    | 6p24. 2    | -0. 142154019 | 0. 057667 | 0. 110191 |
| TBL1Y     | Yp11. 2    | -0. 142150931 | 0. 057673 | 0. 110191 |
| CYP4F35P  | 18p11. 21  | 0. 142144544  | 0. 057684 | 0. 110202 |
| CRAT      | 9q34. 11   | -0. 142129601 | 0. 057711 | 0. 110242 |
| AHDC1     | 1p36. 11-f | 0. 142081476  | 0. 057796 | 0. 110381 |
| PPP1R2B   | 5q33. 3    | -0. 142079384 | 0. 0578   | 0. 110381 |
| SSU72     | 1p36. 33   | 0. 142079384  | 0. 0578   | 0. 110381 |
| RBM12B    | 8q22. 1    | -0. 142071015 | 0. 057815 | 0. 110393 |
| GAGE13    | Xp11. 23   | -0. 142069741 | 0. 057817 | 0. 110393 |
| ADAM29    | 4q34. 1    | -0. 142022177 | 0. 057902 | 0. 110544 |
| NORAD     | 20q11. 23  | -0. 142010336 | 0. 057923 | 0. 110574 |
| NSUN5P2   | 7q11. 23   | 0. 141966397  | 0. 058001 | 0. 110709 |
| RYK       | 3q22. 2    | 0. 141964304  | 0. 058005 | 0. 110709 |
| ABRA      | 8q23. 1    | -0. 141928922 | 0. 058068 | 0. 110819 |
| BAHD1     | 15q15. 1   | -0. 14192455  | 0. 058076 | 0. 110824 |

|           |           |              |          |          |
|-----------|-----------|--------------|----------|----------|
| ABHD13    | 13q33.3   | -0.141918273 | 0.058087 | 0.110835 |
| CCDC144NL | 17p11.2   | -0.141837986 | 0.058231 | 0.111098 |
| SDCBP     | 8q12.1    | -0.141830394 | 0.058245 | 0.111113 |
| SLC27A4   | 9q34.11   | 0.141801101  | 0.058297 | 0.111203 |
| TOMM20L   | 14q23.1   | -0.141789825 | 0.058317 | 0.111231 |
| AGBL3     | 7q33      | -0.141759328 | 0.058372 | 0.111321 |
| FAM189A2  | 9q21.12   | -0.141757161 | 0.058376 | 0.111321 |
| NKAIN1    | 1p35.2    | -0.141742589 | 0.058402 | 0.111361 |
| SIM1      | 6q16.3    | -0.141710797 | 0.058459 | 0.111459 |
| HIST1H3G  | 6p22.2    | 0.141700565  | 0.058477 | 0.111483 |
| TTC23     | 15q26.3   | 0.141686021  | 0.058504 | 0.111522 |
| IL27      | 16p12.1-1 | 0.141677321  | 0.058519 | 0.111542 |
| FPR2      | 19q13.41  | -0.1416627   | 0.058546 | 0.111581 |
| ZNF814    | 19q13.43  | -0.141625343 | 0.058613 | 0.111695 |
| LINC00472 | 6q13      | 0.14162325   | 0.058617 | 0.111695 |
| CDY2B     | Yq11.222  | -0.141612576 | 0.058636 | 0.111721 |
| TAS2R1    | 5p15.31   | -0.141598534 | 0.058661 | 0.111759 |
| TENM4     | 11q14.1   | -0.141566757 | 0.058718 | 0.111857 |
| EED       | 11q14.2   | 0.141531261  | 0.058782 | 0.111954 |
| BTNL8     | 5q35.3    | 0.141529593  | 0.058785 | 0.111954 |
| TEKT5     | 16p13.13  | 0.141529346  | 0.058786 | 0.111954 |
| PRELID3A  | 18p11.21  | 0.141510263  | 0.05882  | 0.112001 |
| KCNJ16    | 17q24.3   | -0.141509291 | 0.058822 | 0.112001 |
| 9-Mar     | 12q14.1   | 0.141466324  | 0.0589   | 0.112138 |
| STX1B     | 16p11.2   | 0.141453769  | 0.058922 | 0.112171 |
| RAB14     | 9q33.2    | -0.141424476 | 0.058975 | 0.112261 |
| FKBP14    | 7p14.3    | -0.141407738 | 0.059006 | 0.112308 |
| SHISA6    | 17p12     | -0.141393396 | 0.059032 | 0.112344 |
| CBL       | 11q23.3   | -0.141390999 | 0.059036 | 0.112344 |
| F2R       | 5q13.3    | -0.14136589  | 0.059081 | 0.11242  |
| REL       | 2p16.1    | -0.141347059 | 0.059116 | 0.112471 |
| ALG5      | 13q13.3   | 0.141344967  | 0.059119 | 0.112471 |
| TXNDC9    | 2q11.2    | 0.141340782  | 0.059127 | 0.112475 |
| SERPINE3  | 13q14.3   | -0.141295255 | 0.05921  | 0.112621 |
| GALNT8    | 12p13.32  | -0.141290766 | 0.059218 | 0.112626 |
| MARS2     | 2q33.1    | -0.141263365 | 0.059267 | 0.112691 |
| GZMK      | 5q11.2    | -0.141261273 | 0.059271 | 0.112691 |
| TMA16     | 4q32.2    | 0.141261273  | 0.059271 | 0.112691 |
| LINC02694 | 15q14     | -0.141259577 | 0.059274 | 0.112691 |
| PNMT      | 17q12     | 0.141254996  | 0.059283 | 0.112696 |
| TFEC      | 7q31.2    | -0.141227795 | 0.059332 | 0.112779 |
| TXNDC12   | 1p32.3    | 0.141185948  | 0.059408 | 0.112908 |
| CNTF      | 11q12.1   | -0.141184151 | 0.059412 | 0.112908 |
| GPR146    | 7p22.3    | -0.141177578 | 0.059424 | 0.11292  |
| CCKBR     | 11p15.4   | -0.141163424 | 0.059449 | 0.112959 |
| CEP85     | 1p36.11   | -0.141144101 | 0.059484 | 0.113004 |
| GIPR      | 19q13.32  | 0.141144101  | 0.059484 | 0.113004 |
| KRT18P55  | 17q11.2   | -0.141128557 | 0.059513 | 0.113047 |
| GBP5      | 1p22.2    | -0.141121085 | 0.059526 | 0.113062 |
| OR2C3     | 1q44      | -0.141117148 | 0.059534 | 0.113065 |
| LRATD2    | 8q24.21   | 0.141108531  | 0.059549 | 0.113084 |
| GRIPAP1   | Xp11.23   | 0.141087607  | 0.059588 | 0.113146 |
| PTENP1    | 9p13.3    | -0.14108133  | 0.059599 | 0.113157 |
| NKG7      | 19q13.41  | -0.141058314 | 0.059641 | 0.113226 |

|          |          |              |          |          |
|----------|----------|--------------|----------|----------|
| CLRN3    | 10q26.2  | 0.14104576   | 0.059664 | 0.113259 |
| PCCA     | 13q32.3  | -0.140991359 | 0.059763 | 0.113437 |
| RPRM     | 2q23.3   | -0.140975242 | 0.059793 | 0.113482 |
| ASAH1    | 8p22     | -0.140968343 | 0.059805 | 0.113495 |
| CCDC70   | 13q14.3  | 0.140949486  | 0.05984  | 0.11355  |
| CLIC6    | 21q22.12 | 0.140943234  | 0.059851 | 0.113561 |
| TMPRSS7  | 3q13.2   | 0.140932607  | 0.059871 | 0.113587 |
| GRAMD4   | 22q13.31 | -0.140907664 | 0.059917 | 0.113663 |
| MCRIP2   | 16p13.3  | 0.140901387  | 0.059928 | 0.113672 |
| MAB21L2  | 4q31.3   | 0.140898986  | 0.059933 | 0.113672 |
| VPS26A   | 10q22.1  | 0.140890925  | 0.059947 | 0.113689 |
| PRPH2    | 6p21.1   | -0.140884648 | 0.059959 | 0.1137   |
| GRK5     | 10q26.11 | -0.140878371 | 0.05997  | 0.113711 |
| SLC25A21 | 14q13.3  | -0.140859835 | 0.060004 | 0.113765 |
| ACTR5    | 20q11.23 | 0.140841829  | 0.060037 | 0.113817 |
| C9ORF153 | 9q21.33  | -0.140827525 | 0.060064 | 0.113856 |
| TRPC5    | Xq23     | -0.140822965 | 0.060072 | 0.113861 |
| BOLA3    | 2p13.1   | 0.140811416  | 0.060093 | 0.11389  |
| CTAGE1   | 18q11.2  | -0.140763292 | 0.060182 | 0.114047 |
| MRGPRD   | 11q13.3  | -0.140759759 | 0.060188 | 0.114048 |
| NME9     | 3q22.3   | -0.140750811 | 0.060205 | 0.114069 |
| GPR89A   | 1q21.1   | 0.140740276  | 0.060224 | 0.114095 |
| NDUFAB1  | 16p12.2  | 0.140696336  | 0.060305 | 0.114237 |
| YARS     | 1p35.1   | 0.140692152  | 0.060313 | 0.114241 |
| CSTL1    | 20p11.21 | 0.14067159   | 0.060351 | 0.1143   |
| IGSF1    | Xq26.1   | -0.140669136 | 0.060355 | 0.1143   |
| HDAC2    | 6q21     | -0.140658674 | 0.060375 | 0.114326 |
| DYSF     | 2p13.2   | -0.140652397 | 0.060386 | 0.114337 |
| FCER2    | 19p13.2  | -0.140626641 | 0.060434 | 0.114416 |
| PPDPFL   | 8q11.21  | 0.140606652  | 0.060471 | 0.114465 |
| TMEM132A | 11q12.2  | 0.140606365  | 0.060471 | 0.114465 |
| UTP4     | 16q22.1  | 0.140597996  | 0.060487 | 0.114483 |
| GAD1     | 2q31.1   | 0.140586561  | 0.060508 | 0.114513 |
| SCML1    | Xp22.13  | -0.14057498  | 0.060529 | 0.114542 |
| H3F3A    | 1q42.12  | 0.140568703  | 0.060541 | 0.114553 |
| LAPTM4A  | 2p24.1   | 0.140562425  | 0.060552 | 0.114564 |
| NDUFS5   | 1p34.3   | 0.140545687  | 0.060583 | 0.114612 |
| IKBIP    | 12q23.1  | -0.140528948 | 0.060614 | 0.11466  |
| NSMF     | 9q34.3   | 0.140520578  | 0.06063  | 0.114668 |
| TMEM143  | 19q13.33 | 0.140520578  | 0.06063  | 0.114668 |
| NFE2L3P2 | 17q21.32 | 0.140516394  | 0.060637 | 0.114671 |
| F2RL3    | 19p13.11 | -0.140503839 | 0.060661 | 0.114704 |
| ST8SIA5  | 18q21.1  | -0.140500671 | 0.060667 | 0.114705 |
| RPL18A   | 19p13.11 | 0.140476639  | 0.060711 | 0.114778 |
| NRTN     | 19p13.3  | -0.140466177 | 0.06073  | 0.114804 |
| CHMP5    | 9p13.3   | 0.140430607  | 0.060796 | 0.114907 |
| PAOX     | 10q26.3  | 0.140430607  | 0.060796 | 0.114907 |
| OR13C5   | 9q31.1   | -0.140401004 | 0.060851 | 0.115    |
| CSRP1    | 1q32.1   | 0.140395037  | 0.060862 | 0.115008 |
| TM4SF20  | 2q36.3   | 0.140392478  | 0.060867 | 0.115008 |
| CRTAM    | 11q24.1  | -0.140369929 | 0.060909 | 0.115076 |
| KDM4E    | 11q21    | -0.140344217 | 0.060957 | 0.115156 |
| ARHGAP5  | 14q12    | 0.140328082  | 0.060987 | 0.115194 |
| C7ORF57  | 7p12.3   | 0.140325695  | 0.060991 | 0.115194 |

|           |          |              |          |          |
|-----------|----------|--------------|----------|----------|
| MCUB      | 4q25     | 0.140323897  | 0.060995 | 0.115194 |
| IL17D     | 13q12.11 | -0.140294604 | 0.061049 | 0.115286 |
| SPHK2     | 19q13.33 | 0.140265311  | 0.061104 | 0.115378 |
| TRERF1    | 6p21.1   | 0.140194171  | 0.061236 | 0.115618 |
| FUT8      | 14q23.3  | 0.140185801  | 0.061252 | 0.115633 |
| CATSPERE  | 1q44     | -0.140183709 | 0.061256 | 0.115633 |
| WFDC6     | 20q13.12 | 0.140163184  | 0.061294 | 0.115694 |
| TSNAXIP1  | 16q22.1  | -0.140106292 | 0.061401 | 0.115884 |
| FRAT2     | 10q24.1  | 0.140081183  | 0.061448 | 0.115962 |
| C9ORF129  | 9q22.31  | -0.140049798 | 0.061506 | 0.116062 |
| CCDC190   | 1q23.3   | 0.139997117  | 0.061605 | 0.116232 |
| SNAI1     | 20q13.13 | -0.139995397 | 0.061608 | 0.116232 |
| ARHGEF17  | 11q13.4  | -0.139982843 | 0.061632 | 0.116266 |
| MTFMT     | 15q22.31 | 0.139966104  | 0.061663 | 0.116314 |
| OR11A1    | 6p22.1   | -0.13996268  | 0.06167  | 0.116315 |
| SNAI2     | 8q11.21  | 0.139951457  | 0.061691 | 0.116344 |
| PDZK1     | 1q21.1   | -0.139932626 | 0.061726 | 0.1164   |
| AP4E1     | 15q21.2  | -0.139884502 | 0.061817 | 0.116559 |
| TMEM19    | 12q21.1  | -0.139853117 | 0.061876 | 0.11666  |
| INTS7     | 1q32.3   | -0.139800808 | 0.061974 | 0.116834 |
| ECRG4     | 2q12.2   | -0.139788985 | 0.061996 | 0.116865 |
| HLA-DPB1  | 6p21.32  | -0.139771515 | 0.062029 | 0.116913 |
| NKD1      | 16q12.1  | 0.139769422  | 0.062033 | 0.116913 |
| KRT1      | 12q13.13 | -0.139752824 | 0.062065 | 0.116958 |
| OR6F1     | 1q44     | -0.13975057  | 0.062069 | 0.116958 |
| SBSPON    | 8q21.11  | -0.139733852 | 0.062101 | 0.117006 |
| TYSND1    | 10q22.1  | 0.139712929  | 0.06214  | 0.11707  |
| SRPRB     | 3q22.1   | -0.139704559 | 0.062156 | 0.117088 |
| GFI1B     | 9q34.13  | 0.139677907  | 0.062206 | 0.117163 |
| HAPLN4    | 19p13.11 | 0.139677359  | 0.062207 | 0.117163 |
| CDK5R2    | 2q35     | -0.139671082 | 0.062219 | 0.117175 |
| WRAP53    | 17p13.1  | -0.139643881 | 0.062271 | 0.11726  |
| SSTR5-AS1 | 16p13.3  | -0.139612496 | 0.06233  | 0.117361 |
| CCDC150   | 2q33.1   | 0.139604126  | 0.062346 | 0.11738  |
| ZKSCAN5   | 7q22.1   | -0.139599941 | 0.062354 | 0.117384 |
| RNASEH2B  | 13q14.3  | -0.139541355 | 0.062465 | 0.117582 |
| SCRN3     | 2q31.1   | -0.139522524 | 0.062501 | 0.117638 |
| GLI3      | 7p14.1   | -0.139489047 | 0.062564 | 0.117747 |
| SLC25A30  | 13q14.13 | -0.139472308 | 0.062596 | 0.117795 |
| GPR31     | 6q27     | -0.139468605 | 0.062603 | 0.117797 |
| GPER1     | 7p22.3   | 0.139459754  | 0.06262  | 0.117818 |
| PCDHA9    | 5q31.3   | -0.139398965 | 0.062735 | 0.118013 |
| VGLL2     | 6q22.1   | 0.139398631  | 0.062736 | 0.118013 |
| GLB1L3    | 11q25    | -0.139394303 | 0.062744 | 0.118013 |
| EDDM3A    | 14q11.2  | -0.139392945 | 0.062747 | 0.118013 |
| ZNF585A   | 19q13.12 | -0.139386521 | 0.062759 | 0.118025 |
| PCDH8     | 13q14.3  | -0.139369839 | 0.062791 | 0.118073 |
| FCRL6     | 1q23.2   | -0.139364624 | 0.062801 | 0.118081 |
| MORN1     | 1p36.32  | -0.139357228 | 0.062815 | 0.118096 |
| CCDC47    | 17q23.3  | -0.139340489 | 0.062847 | 0.118145 |
| RBM14     | 11q13.2  | -0.139300734 | 0.062923 | 0.118277 |
| PRPH      | 12q13.12 | -0.139256868 | 0.063006 | 0.118423 |
| DXO       | 6p21.33  | -0.139244241 | 0.063031 | 0.118457 |
| IMMP2L    | 7q31.1   | -0.13921704  | 0.063083 | 0.118544 |

|           |           |               |           |           |
|-----------|-----------|---------------|-----------|-----------|
| CEP89     | 19q13. 11 | 0. 139212855  | 0. 063091 | 0. 118548 |
| CDC27     | 17q21. 32 | -0. 139208671 | 0. 063099 | 0. 118551 |
| SLC37A4   | 11q23. 3  | -0. 139196117 | 0. 063123 | 0. 118585 |
| SPATA6    | 1p33      | -0. 139175193 | 0. 063163 | 0. 11865  |
| SEC13     | 3p25. 3   | 0. 139152177  | 0. 063207 | 0. 118721 |
| FLJ36000  | 17p11. 2  | -0. 139133625 | 0. 063242 | 0. 118777 |
| HCN4      | 15q24. 1  | -0. 139129452 | 0. 06325  | 0. 118781 |
| G2E3      | 14q12     | -0. 139120792 | 0. 063267 | 0. 118801 |
| SESTD1    | 2q31. 2   | 0. 139106145  | 0. 063295 | 0. 118842 |
| C6ORF118  | 6q27      | -0. 13910058  | 0. 063306 | 0. 118851 |
| INCA1     | 17p13. 2  | -0. 139083202 | 0. 063339 | 0. 118902 |
| MYL2      | 12q24. 11 | 0. 139072366  | 0. 06336  | 0. 11893  |
| PSD       | 10q24. 32 | -0. 13906639  | 0. 063371 | 0. 118937 |
| CHRNE     | 17p13. 2  | -0. 139064298 | 0. 063375 | 0. 118937 |
| NEFH      | 22q12. 2  | -0. 139020359 | 0. 06346  | 0. 119084 |
| CNEP1R1   | 16q12. 1  | -0. 139000554 | 0. 063498 | 0. 119145 |
| NAALAD2   | 11q14. 3  | -0. 138997343 | 0. 063504 | 0. 119145 |
| CMPK1     | 1p33      | 0. 138991066  | 0. 063516 | 0. 119153 |
| RNF144A   | 2p25. 1   | -0. 138988973 | 0. 06352  | 0. 119153 |
| ENPP7     | 17q25. 3  | -0. 13898137  | 0. 063535 | 0. 119168 |
| MAP4K1    | 19q13. 2  | -0. 138978511 | 0. 06354  | 0. 119168 |
| CXADRP3   | 18p11. 21 | -0. 138953899 | 0. 063587 | 0. 119246 |
| SGMS2     | 4q25      | 0. 138949219  | 0. 063596 | 0. 119251 |
| TMEFF1    | 9q31. 1   | -0. 138940849 | 0. 063613 | 0. 11927  |
| KRT23     | 17q21. 2  | 0. 138913648  | 0. 063665 | 0. 119354 |
| C6ORF201  | 6p25. 2   | -0. 138911556 | 0. 063669 | 0. 119354 |
| PODXL2    | 3q21. 3   | -0. 138903187 | 0. 063685 | 0. 119373 |
| STIMATE   | 3p21. 1   | -0. 138863432 | 0. 063762 | 0. 119505 |
| OR5V1     | 6p22. 1   | -0. 138851853 | 0. 063784 | 0. 119536 |
| IGSF5     | 21q22. 2  | 0. 138842581  | 0. 063802 | 0. 119558 |
| LINC00475 | 9q22. 31  | -0. 138753564 | 0. 063974 | 0. 11987  |
| TARP      | 7p14. 1   | -0. 138744893 | 0. 063991 | 0. 11989  |
| SLC28A1   | 15q25. 3  | -0. 138725003 | 0. 064029 | 0. 119951 |
| EIF4G1    | 3q27. 1   | 0. 138708597  | 0. 064061 | 0. 119999 |
| MAPK1IP1I | 14q22. 3  | -0. 138704413 | 0. 064069 | 0. 120003 |
| ECI1      | 16p13. 3  | 0. 138683489  | 0. 06411  | 0. 120062 |
| TUSC7     | 3q13. 31  | -0. 138681809 | 0. 064113 | 0. 120062 |
| EIF1B     | 3p22. 1   | -0. 138656289 | 0. 064162 | 0. 120144 |
| CUTC      | 10q24. 2  | -0. 138652104 | 0. 064171 | 0. 120144 |
| TMEM132C  | 12q24. 32 | -0. 138650012 | 0. 064175 | 0. 120144 |
| IL23A     | 12q13. 3  | 0. 138622811  | 0. 064227 | 0. 120232 |
| BET1L     | 11p15. 5  | 0. 138618626  | 0. 064235 | 0. 120235 |
| BSDC1     | 1p35. 1   | -0. 138562133 | 0. 064345 | 0. 120418 |
| ASB7      | 15q26. 3  | -0. 138562133 | 0. 064345 | 0. 120418 |
| DHFR      | 5q14. 1   | 0. 138547486  | 0. 064374 | 0. 12046  |
| MAMDC2    | 9q21. 12  | -0. 138514008 | 0. 064439 | 0. 120567 |
| MSRB2     | 10p12. 2  | 0. 138511916  | 0. 064443 | 0. 120567 |
| DHX9      | 1q25. 3   | -0. 138478438 | 0. 064508 | 0. 120674 |
| COQ3      | 6q16. 2   | -0. 138476346 | 0. 064512 | 0. 120674 |
| TM4SF19   | 3q29      | 0. 13847328   | 0. 064518 | 0. 120674 |
| ITIH6     | Xp11. 22  | -0. 138470248 | 0. 064524 | 0. 120674 |
| SFRP4     | 7p14. 1   | -0. 138413575 | 0. 064634 | 0. 120865 |
| TPM1      | 15q22. 2  | 0. 138411483  | 0. 064639 | 0. 120865 |
| TMEM147   | 19q13. 12 | 0. 138388467  | 0. 064683 | 0. 12093  |

|           |           |              |          |          |
|-----------|-----------|--------------|----------|----------|
| GAGE2D    | Xp11. 23  | -0.138387611 | 0.064685 | 0.12093  |
| SCARNA10  | 12p13. 31 | -0.138383536 | 0.064693 | 0.120933 |
| LOC641367 | 19p12     | -0.13838017  | 0.0647   | 0.120934 |
| RIMKLA    | 1p34. 2   | -0.138317327 | 0.064822 | 0.121153 |
| C3        | 19p13. 3  | -0.138313142 | 0.064831 | 0.121157 |
| KCND1     | Xp11. 23  | -0.138294311 | 0.064867 | 0.121214 |
| NKAIN3    | 8q12. 3   | 0.13828481   | 0.064886 | 0.121238 |
| LINC00661 | 19p13. 12 | 0.138280249  | 0.064895 | 0.121243 |
| C2ORF72   | 2q37. 1   | -0.13826711  | 0.064921 | 0.12128  |
| TMEM167B  | 1p13. 3   | -0.138260833 | 0.064933 | 0.121291 |
| THG1L     | 5q33. 3   | 0.13823991   | 0.064974 | 0.121356 |
| JOSD1     | 22q13. 1  | 0.138235725  | 0.064982 | 0.12136  |
| ZNF416    | 19q13. 43 | -0.138223171 | 0.065007 | 0.121395 |
| SRP14P1   | 12p13. 31 | -0.138200155 | 0.065052 | 0.121468 |
| MYOT      | 5q31. 2   | -0.138196463 | 0.065059 | 0.12147  |
| ARPP19    | 15q21. 2  | -0.138158308 | 0.065134 | 0.121599 |
| QRFP      | 9q34. 12  | -0.138117168 | 0.065215 | 0.121738 |
| LINC0071C | 10p14     | -0.138081859 | 0.065284 | 0.121856 |
| TRIM28    | 19q13. 43 | 0.138062059  | 0.065323 | 0.121918 |
| POMC      | 2p23. 3   | -0.138032766 | 0.065381 | 0.122014 |
| ZNF500    | 16p13. 3  | -0.13801812  | 0.06541  | 0.122056 |
| CDH12     | 5p14. 3   | -0.138000624 | 0.065444 | 0.122109 |
| DEFB103A  | 8p23. 1   | 0.137973325  | 0.065498 | 0.122198 |
| NACA2     | 17q23. 2  | 0.137959534  | 0.065525 | 0.122237 |
| CLDN14    | 21q22. 13 | 0.137952571  | 0.065539 | 0.122252 |
| KRTAP4-8  | 17q21. 2  | -0.137940229 | 0.065563 | 0.122286 |
| CD83      | 6p23      | -0.137915594 | 0.065612 | 0.122365 |
| HS3ST5    | 6q21-q22. | 0.137864723  | 0.065712 | 0.122541 |
| YWHAQ     | 2p25. 1   | -0.137859101 | 0.065724 | 0.12255  |
| IFIH1     | 2q24. 2   | 0.137840269  | 0.065761 | 0.122605 |
| MRPS10    | 6p21. 1   | 0.137838177  | 0.065765 | 0.122605 |
| C2ORF73   | 2p16. 2   | -0.137813893 | 0.065813 | 0.122683 |
| CKAP4     | 12q23. 3  | -0.137804699 | 0.065831 | 0.122705 |
| TRMT11    | 6q22. 32  | 0.137790053  | 0.06586  | 0.122744 |
| UBE2G2    | 21q22. 3  | -0.137787961 | 0.065864 | 0.122744 |
| MTR       | 1q43      | -0.137779591 | 0.065881 | 0.122764 |
| LINC0155E | 6q27      | -0.13776786  | 0.065904 | 0.122796 |
| TCF19     | 6p21. 33  | 0.13771682   | 0.066005 | 0.122966 |
| FAM216B   | 13q14. 11 | -0.137715441 | 0.066008 | 0.122966 |
| DPH3P1    | 20q13. 33 | -0.137704266 | 0.06603  | 0.122996 |
| RPTOR     | 17q25. 3  | -0.137693805 | 0.066051 | 0.123023 |
| DOCK7     | 1p31. 3   | -0.137662419 | 0.066113 | 0.123124 |
| FUT7      | 9q34. 3   | -0.137660327 | 0.066118 | 0.123124 |
| ZNF774    | 15q26. 1  | 0.13765405   | 0.06613  | 0.123136 |
| MTRFR2    | 6q23. 3   | 0.137624757  | 0.066188 | 0.123214 |
| APIP      | 11p13     | -0.137622664 | 0.066193 | 0.123214 |
| DAZ4      | Yq11. 23  | -0.13762216  | 0.066194 | 0.123214 |
| SUPT5H    | 19q13. 2  | 0.137620572  | 0.066197 | 0.123214 |
| LANCL1    | 2q34      | -0.137608018 | 0.066222 | 0.123249 |
| WLS       | 1p31. 3   | -0.137564078 | 0.066309 | 0.1234   |
| DPF3      | 14q24. 2  | -0.137507585 | 0.066422 | 0.123587 |
| FAHD2B    | 2q11. 2   | -0.137507585 | 0.066422 | 0.123587 |
| ARHGEF38  | 4q24      | 0.137491134  | 0.066455 | 0.123637 |
| VSTM2B    | 19q12     | -0.137487211 | 0.066462 | 0.12364  |

|           |           |              |          |          |
|-----------|-----------|--------------|----------|----------|
| CCAR1     | 10q21.3   | -0.137442722 | 0.066551 | 0.123793 |
| GAGE2C    | Xp11.23   | -0.137423294 | 0.06659  | 0.123854 |
| SLC25A17  | 22q13.2   | -0.137375766 | 0.066685 | 0.124016 |
| PRKAG1    | 12q13.12  | -0.137373674 | 0.066689 | 0.124016 |
| IRF4      | 6p25.3    | -0.137329734 | 0.066777 | 0.124168 |
| PSG9      | 19q13.31  | 0.13732075   | 0.066795 | 0.12419  |
| GLT8D1    | 3p21.1    | -0.137310903 | 0.066815 | 0.124215 |
| COMTD1    | 10q22.2   | 0.137296257  | 0.066844 | 0.124258 |
| LINC00313 | 21q22.3   | 0.137288919  | 0.066859 | 0.124262 |
| PIDD1     | 11p15.5   | 0.137287887  | 0.066861 | 0.124262 |
| CD300LB   | 17q25.1   | -0.137285795 | 0.066865 | 0.124262 |
| MEX3B     | 15q25.2   | -0.137279518 | 0.066878 | 0.124262 |
| MIR17HG   | 13q31.3   | 0.137279518  | 0.066878 | 0.124262 |
| GTF2IRD2  | 7q11.23   | -0.137273241 | 0.066891 | 0.124274 |
| ARC       | 8q24.3    | -0.137250225 | 0.066937 | 0.124348 |
| STK3      | 8q22.2    | 0.13724604   | 0.066945 | 0.124353 |
| FTX       | Xq13.2    | -0.137239763 | 0.066958 | 0.124364 |
| RNF166    | 16q24.2-c | -0.137225117 | 0.066987 | 0.124407 |
| PTCD3     | 2p11.2    | -0.137191639 | 0.067054 | 0.124521 |
| ULBP3     | 6q25.1    | 0.137181177  | 0.067076 | 0.124548 |
| TBCCD1    | 3q27.3    | 0.137170715  | 0.067097 | 0.124576 |
| CLCA3P    | 1p22.3    | 0.137156532  | 0.067125 | 0.124615 |
| IPO7      | 11p15.4   | -0.137153977 | 0.06713  | 0.124615 |
| MS4A1     | 11q12.2   | -0.137144232 | 0.06715  | 0.12464  |
| USP24     | 1p32.3    | -0.137126776 | 0.067185 | 0.124694 |
| ANKDD1A   | 15q22.31  | -0.137118406 | 0.067202 | 0.124713 |
| LIG3      | 17q12     | -0.137051451 | 0.067337 | 0.124952 |
| KRTAP10-1 | 21q22.3   | 0.136993749  | 0.067453 | 0.125156 |
| GOLGA2P7  | 15q25.2   | 0.136990773  | 0.067459 | 0.125156 |
| HSD17B6   | 12q13.3   | 0.136980311  | 0.06748  | 0.125178 |
| FOXN1     | 17q11.2   | 0.136978693  | 0.067484 | 0.125178 |
| PAQR5     | 15q23     | 0.136967757  | 0.067506 | 0.125208 |
| ALG10B    | 12q12     | -0.136963572 | 0.067514 | 0.125212 |
| PDGFC     | 4q32.1    | 0.136957295  | 0.067527 | 0.125224 |
| ARMH3     | 10q24.32  | -0.136948926 | 0.067544 | 0.125243 |
| SIRPG     | 20p13     | -0.136942649 | 0.067557 | 0.125255 |
| PHC3      | 3q26.2    | -0.136932187 | 0.067578 | 0.125283 |
| SIGLEC8   | 19q13.41  | -0.13691754  | 0.067607 | 0.125326 |
| ISM1      | 20p12.1   | 0.136896617  | 0.06765  | 0.125393 |
| LMLN      | 3q29      | -0.13689034  | 0.067662 | 0.125405 |
| NFKBIL1   | 6p21.33   | 0.136856862  | 0.06773  | 0.125519 |
| NEUROG1   | 5q31.1    | -0.136852166 | 0.06774  | 0.125519 |
| PLPPR2    | 19p13.2   | -0.136850585 | 0.067743 | 0.125519 |
| HNRNPA1L2 | 13q14.3   | -0.136802461 | 0.067841 | 0.125689 |
| NLRP3     | 1q44      | -0.136781537 | 0.067883 | 0.125756 |
| HDHD5-AS1 | 22q11.1   | -0.136772728 | 0.067901 | 0.125777 |
| SCARNA7   | 3q25.33   | 0.136724576  | 0.067999 | 0.125947 |
| CLCN3     | 4q33      | -0.136699935 | 0.068049 | 0.126028 |
| NXT2      | Xq23      | -0.136691566 | 0.068066 | 0.126048 |
| USP40     | 2q37.1    | 0.136683196  | 0.068083 | 0.126068 |
| KRTAP10-3 | 21q22.3   | -0.136663282 | 0.068124 | 0.126131 |
| HNRNPUL2  | 11q12.3   | 0.13666018   | 0.06813  | 0.126131 |
| LCE1C     | 1q21.3    | 0.136640175  | 0.068171 | 0.126195 |
| C11ORF21  | 11p15.5   | -0.136626703 | 0.068198 | 0.126234 |



|           |           |               |           |           |
|-----------|-----------|---------------|-----------|-----------|
| OSBPL11   | 3q21. 2   | -0. 136555563 | 0. 068343 | 0. 126491 |
| ZBTB43    | 9q33. 3   | -0. 136549285 | 0. 068356 | 0. 126503 |
| SNTB2     | 16q22. 1  | -0. 1365179   | 0. 06842  | 0. 12661  |
| FCRL1     | 1q23. 1   | -0. 136511557 | 0. 068433 | 0. 12661  |
| S100A7A   | 1q21. 3   | -0. 136510336 | 0. 068436 | 0. 12661  |
| TMPRSS11F | 4q13. 2   | 0. 136505497  | 0. 068445 | 0. 12661  |
| ABHD18    | 4q28. 2   | -0. 136505346 | 0. 068446 | 0. 12661  |
| HSPA12B   | 20p13     | -0. 136501161 | 0. 068454 | 0. 126615 |
| SH3BP4    | 2q37. 2   | -0. 136467684 | 0. 068523 | 0. 126729 |
| XRN2      | 20p11. 22 | -0. 136461406 | 0. 068536 | 0. 126741 |
| CYP2B6    | 19q13. 2  | 0. 136443632  | 0. 068572 | 0. 126797 |
| ACSM1     | 16p12. 3  | 0. 136438391  | 0. 068583 | 0. 126805 |
| FBX011    | 2p16. 3   | -0. 136421652 | 0. 068617 | 0. 126857 |
| ZNHIT2    | 11q13. 1  | 0. 13641295   | 0. 068635 | 0. 126878 |
| B3GNT4    | 12q24. 31 | 0. 136371435  | 0. 06872  | 0. 12701  |
| GLYATL1   | 11q12. 1  | -0. 136368822 | 0. 068725 | 0. 12701  |
| SLC13A1   | 7q31. 32  | -0. 136368796 | 0. 068725 | 0. 12701  |
| OR10G8    | 11q24. 2  | -0. 13635917  | 0. 068745 | 0. 127024 |
| ZBTB34    | 9q33. 3   | -0. 136358881 | 0. 068746 | 0. 127024 |
| FAM78B    | 1q24. 1   | -0. 136344235 | 0. 068776 | 0. 127068 |
| HNRNPK    | 9q21. 32  | -0. 136308664 | 0. 068849 | 0. 127179 |
| FBXW5     | 9q34. 3   | 0. 136308664  | 0. 068849 | 0. 127179 |
| PARP9     | 3q21. 1   | 0. 136264725  | 0. 068939 | 0. 127334 |
| HES7      | 17p13. 1  | 0. 136219403  | 0. 069032 | 0. 127489 |
| AGBL1     | 15q25. 3  | 0. 136217742  | 0. 069036 | 0. 127489 |
| LRTM1     | 3p14. 3   | -0. 136181683 | 0. 06911  | 0. 127615 |
| LYG1      | 2q11. 2   | 0. 136164363  | 0. 069146 | 0. 127669 |
| LRRC28    | 15q26. 3  | -0. 136158015 | 0. 069159 | 0. 127681 |
| NUDT6     | 4q28. 1   | 0. 136145461  | 0. 069185 | 0. 127717 |
| SNORA22   | 7q11. 21  | -0. 136135655 | 0. 069205 | 0. 127743 |
| ANKRD20A1 | 21q11. 2  | 0. 136075051  | 0. 06933  | 0. 127961 |
| CCDC39    | 3q26. 33  | -0. 136072228 | 0. 069336 | 0. 127961 |
| SIX4      | 14q23. 1  | 0. 136051305  | 0. 069379 | 0. 128025 |
| LHPP      | 10q26. 13 | 0. 136049212  | 0. 069383 | 0. 128025 |
| LRRIQ3    | 1p31. 1   | -0. 13604322  | 0. 069396 | 0. 128036 |
| E2F4      | 16q22. 1  | 0. 136030381  | 0. 069422 | 0. 128073 |
| LYRM4     | 6p25. 1   | -0. 13601155  | 0. 069461 | 0. 128122 |
| ADGRB1    | 8q24. 3   | 0. 136009457  | 0. 069466 | 0. 128122 |
| MED16     | 19p13. 3  | 0. 136007365  | 0. 06947  | 0. 128122 |
| FBLL1     | 5q34      | -0. 136005273 | 0. 069474 | 0. 128122 |
| RPA2      | 1p35. 3   | -0. 135998996 | 0. 069487 | 0. 128134 |
| EFCAB11   | 14q32. 11 | 0. 135992719  | 0. 0695   | 0. 128146 |
| FOXC2     | 16q24. 1  | 0. 13597598   | 0. 069535 | 0. 128198 |
| FRG1BP    | 20q11. 1  | -0. 135965518 | 0. 069557 | 0. 128226 |
| CHRNA1    | 2q31. 1   | 0. 135959638  | 0. 069569 | 0. 128237 |
| SYT14P1   | 4q13. 2   | -0. 135955717 | 0. 069577 | 0. 12824  |
| FAM225B   | 9q32      | -0. 13589647  | 0. 0697   | 0. 128445 |
| SCRT1     | 8q24. 3   | -0. 135895903 | 0. 069701 | 0. 128445 |
| C17ORF58  | 17q24. 2  | -0. 135881824 | 0. 06973  | 0. 128487 |
| SCARNA9L  | Xp22. 12  | 0. 135859312  | 0. 069777 | 0. 128561 |
| KDM1A     | 1p36. 12  | 0. 135850438  | 0. 069795 | 0. 128583 |
| ERLIN1    | 10q24. 31 | 0. 135821145  | 0. 069856 | 0. 128683 |
| GPX8      | 5q11. 2   | 0. 135814868  | 0. 069869 | 0. 128684 |
| TUBG1     | 17q21. 2  | 0. 135814868  | 0. 069869 | 0. 128684 |

|           |           |              |          |          |
|-----------|-----------|--------------|----------|----------|
| C10RF158  | 1p36. 21  | -0.135809785 | 0.06988  | 0.128691 |
| PTPN2     | 18p11. 21 | 0.135802314  | 0.069895 | 0.128708 |
| RTL8C     | Xq26. 3   | 0.135796037  | 0.069908 | 0.12872  |
| LOC285074 | 2p11. 2   | 0.135791852  | 0.069917 | 0.128724 |
| HSP90AB1  | 6p21. 1   | -0.135779298 | 0.069943 | 0.128761 |
| SLC39A14  | 8p21. 3   | -0.135758375 | 0.069987 | 0.128829 |
| GAGE8     | Xp11      | -0.135723482 | 0.070059 | 0.128951 |
| HNRNPLL   | 2p22. 1   | -0.135716528 | 0.070074 | 0.128966 |
| TPD52L1   | 6q22. 31  | 0.135712343  | 0.070083 | 0.12897  |
| CDC20B    | 5q11. 2   | 0.135706292  | 0.070095 | 0.128981 |
| BPIFB6    | 20q11. 21 | -0.135679935 | 0.07015  | 0.12907  |
| ZNF77     | 19p13. 3  | -0.135672588 | 0.070165 | 0.129087 |
| FADS3     | 11q12. 2  | -0.135668403 | 0.070174 | 0.129091 |
| ZNF629    | 16p11. 2  | 0.13563911   | 0.070235 | 0.129191 |
| FAM20B    | 1q25. 2   | -0.135620279 | 0.070275 | 0.129248 |
| TMEM266   | 15q24. 2  | -0.135618187 | 0.070279 | 0.129248 |
| NF1       | 17q11. 2  | -0.135614002 | 0.070288 | 0.129252 |
| PROP1     | 5q35. 3   | -0.135581607 | 0.070355 | 0.129365 |
| MCM4      | 8q11. 21  | 0.135547047  | 0.070428 | 0.129486 |
| CNR2      | 1p36. 11  | -0.135511691 | 0.070502 | 0.12961  |
| TMEM185A  | Xq28      | 0.135488461  | 0.07055  | 0.129687 |
| CEP170P1  | 4q26      | -0.135463166 | 0.070603 | 0.129773 |
| HIST2H2AE | 1q21. 2   | 0.135430536  | 0.070672 | 0.129887 |
| PCDHB11   | 5q31. 3   | -0.135398489 | 0.070739 | 0.129998 |
| GNAI2     | 3p21. 31  | 0.135371289  | 0.070796 | 0.130091 |
| GSTT1     | 22q11. 23 | 0.135365944  | 0.070808 | 0.1301   |
| MAP7      | 6q23. 3   | -0.135360827 | 0.070818 | 0.1301   |
| FAM110C   | 2p25. 3   | 0.135356642  | 0.070827 | 0.1301   |
| TRIM32    | 9q33. 1   | -0.135356642 | 0.070827 | 0.1301   |
| HAR1B     | 20q13. 33 | -0.135352357 | 0.070836 | 0.130105 |
| THBS1     | 15q14     | -0.135344088 | 0.070853 | 0.130125 |
| SMCR5     | -         | -0.135338053 | 0.070866 | 0.130136 |
| CEBPG     | 19q13. 11 | 0.135331534  | 0.07088  | 0.130149 |
| MORN5     | 9q33. 2   | -0.135309605 | 0.070926 | 0.130222 |
| RABGGTB   | 1p31. 1   | -0.13528341  | 0.070981 | 0.130311 |
| PHF23     | 17p13. 1  | -0.135272948 | 0.071003 | 0.13034  |
| TFDP1     | 13q34     | 0.135245747  | 0.07106  | 0.130422 |
| MSMB      | 10q11. 22 | 0.135245554  | 0.071061 | 0.130422 |
| RPL37     | 5p13. 1   | 0.13521227   | 0.071131 | 0.130539 |
| H1FX      | 3q21. 3   | 0.13516833   | 0.071224 | 0.130697 |
| H2AFY     | 5q31. 1   | 0.135141129  | 0.071281 | 0.130779 |
| LY86-AS1  | 6p25. 1   | -0.135140918 | 0.071282 | 0.130779 |
| ANKMY2    | 7p21. 1   | 0.135136945  | 0.07129  | 0.130782 |
| CIR1      | 2q31. 1   | 0.135128575  | 0.071308 | 0.130803 |
| LINC0016C | 21q22. 12 | 0.135122914  | 0.07132  | 0.130813 |
| COA5      | 2q11. 2   | 0.135116021  | 0.071334 | 0.13082  |
| TH        | 11p15. 5  | 0.135114846  | 0.071337 | 0.13082  |
| BET1      | 7q21. 3   | -0.135057435 | 0.071458 | 0.131031 |
| CCDC102A  | 16q21     | 0.135049066  | 0.071476 | 0.131051 |
| MYCBPAP   | 17q21. 33 | -0.135045998 | 0.071482 | 0.131051 |
| C3P1      | 19p13. 2  | 0.135032631  | 0.071511 | 0.131091 |
| WDR53     | 3q29      | 0.134961257  | 0.071662 | 0.131356 |
| PDIA5     | 3q21. 1   | -0.134952817 | 0.07168  | 0.131377 |
| TYMSOS    | 18p11. 32 | 0.134940334  | 0.071707 | 0.131414 |

|          |            |               |           |           |
|----------|------------|---------------|-----------|-----------|
| ROB02    | 3p12. 3    | -0. 134937195 | 0. 071713 | 0. 131414 |
| HEY2     | 6q22. 31   | -0. 134923524 | 0. 071742 | 0. 131455 |
| MILR1    | 17q23. 3   | 0. 134885862  | 0. 071822 | 0. 131574 |
| INHBE    | 12q13. 3   | 0. 13488384   | 0. 071827 | 0. 131574 |
| TOP3B    | 22q11. 22  | 0. 13488377   | 0. 071827 | 0. 131574 |
| CEND1    | 11p15. 5   | -0. 134860824 | 0. 071876 | 0. 131651 |
| GH1      | 17q23. 3   | -0. 134839202 | 0. 071922 | 0. 131713 |
| KLRC2    | 12p13. 2   | -0. 13483574  | 0. 071929 | 0. 131713 |
| NAALADL2 | 3q26. 31   | 0. 134835645  | 0. 071929 | 0. 131713 |
| CTCFL    | 20q13. 31  | 0. 134816814  | 0. 071969 | 0. 131774 |
| UBXN11   | 1p36. 11   | 0. 134812629  | 0. 071978 | 0. 131779 |
| SNORA29  | 6q25. 3    | 0. 134786186  | 0. 072034 | 0. 13187  |
| DISC1    | 1q42. 2    | -0. 134779152 | 0. 072049 | 0. 131885 |
| OR2A14   | 7q35       | 0. 134772691  | 0. 072063 | 0. 131898 |
| SAMSN1   | 21q11. 2   | -0. 13476869  | 0. 072072 | 0. 131902 |
| CD53     | 1p13. 3    | -0. 134762413 | 0. 072085 | 0. 131914 |
| FAAP24   | 19q13. 11  | 0. 13472475   | 0. 072165 | 0. 132049 |
| CLTC     | 17q23. 1   | -0. 134714289 | 0. 072188 | 0. 132074 |
| RAD9B    | 12q24. 11  | -0. 134712196 | 0. 072192 | 0. 132074 |
| CEP170   | 1q43       | -0. 134705919 | 0. 072206 | 0. 132074 |
| ETNK2    | 1q32. 1    | -0. 134705919 | 0. 072206 | 0. 132074 |
| ZIC3     | Xq26. 3    | -0. 134698085 | 0. 072222 | 0. 132091 |
| SH3TC1   | 4p16. 1    | 0. 134695457  | 0. 072228 | 0. 132091 |
| MEFV     | 16p13. 3   | -0. 134665189 | 0. 072293 | 0. 132197 |
| PABPN1   | 14q11. 2   | 0. 13466198   | 0. 0723   | 0. 132197 |
| TRIM51   | 11q12. 1   | -0. 134652709 | 0. 072319 | 0. 132222 |
| MYT1L    | 2p25. 3    | -0. 134638725 | 0. 072349 | 0. 132264 |
| AMBN     | 4q13. 3    | -0. 134628543 | 0. 072371 | 0. 132292 |
| FAM27B   | 9q21. 11   | 0. 134607707  | 0. 072416 | 0. 132361 |
| TAGAP    | 6q25. 3    | -0. 134601301 | 0. 072429 | 0. 132374 |
| IBA57    | 1q42. 13   | -0. 134580378 | 0. 072474 | 0. 132444 |
| EPHA6    | 3q11. 2    | -0. 134555973 | 0. 072526 | 0. 132524 |
| CABP2    | 11q13. 2   | 0. 134553675  | 0. 072531 | 0. 132524 |
| LGSN     | 6q12       | -0. 134530909 | 0. 07258  | 0. 132601 |
| SUMO4    | 6q25. 1    | 0. 134500627  | 0. 072645 | 0. 132708 |
| AGMAT    | 1p36. 21   | 0. 134485246  | 0. 072678 | 0. 132756 |
| SPATA18  | 4q12       | -0. 134482037 | 0. 072685 | 0. 132756 |
| CCDC22   | Xp11. 23   | 0. 134473668  | 0. 072703 | 0. 132777 |
| SULT1A2  | 16p11. 2   | 0. 134448559  | 0. 072757 | 0. 132864 |
| IRX4     | 5p15. 33   | -0. 134443698 | 0. 072767 | 0. 13287  |
| KCTD17   | 22q12. 3   | -0. 134394158 | 0. 072874 | 0. 133044 |
| FAT3     | 11q14. 3   | -0. 134393182 | 0. 072876 | 0. 133044 |
| HLA-H    | 6p22. 1    | 0. 134389973  | 0. 072883 | 0. 133045 |
| SWI5     | 9q34. 11   | -0. 134379512 | 0. 072905 | 0. 133074 |
| CYBB     | Xp21. 1-p1 | -0. 134323018 | 0. 073027 | 0. 133284 |
| TIGIT    | 3q13. 31   | -0. 134306279 | 0. 073063 | 0. 133337 |
| CALB1    | 8q21. 3    | -0. 134296184 | 0. 073085 | 0. 133365 |
| PGA3     | 11q12. 2   | -0. 13428137  | 0. 073117 | 0. 133411 |
| FRAT1    | 10q24. 1   | -0. 134276986 | 0. 073126 | 0. 133416 |
| CDK5RAP2 | 9q33. 2    | -0. 134193292 | 0. 073307 | 0. 133734 |
| NRL      | 14q11. 2-c | -0. 134155629 | 0. 073388 | 0. 13387  |
| NUAK1    | 12q23. 3   | -0. 134140983 | 0. 07342  | 0. 133903 |
| RNF169   | 11q13. 4   | -0. 134140983 | 0. 07342  | 0. 133903 |
| TEX29    | 13q34      | 0. 134102854  | 0. 073503 | 0. 134042 |

|           |                    |              |          |          |
|-----------|--------------------|--------------|----------|----------|
| CASP2     | 7q34               | 0.134094951  | 0.07352  | 0.134048 |
| RPL19     | 17q12              | 0.134094951  | 0.07352  | 0.134048 |
| ASB11     | Xp22.2             | -0.134091291 | 0.073528 | 0.134051 |
| ZBP1      | 20q13.31           | 0.134069843  | 0.073574 | 0.134119 |
| FAM71E1   | 19q13.33           | 0.134067751  | 0.073579 | 0.134119 |
| UBE2L3    | 22q11.21           | 0.13404055   | 0.073638 | 0.134215 |
| PPIL1     | 6p21.2             | -0.134036365 | 0.073647 | 0.134219 |
| NTMT1     | 9q34.11            | 0.134021719  | 0.073679 | 0.134265 |
| UTP15     | 5q13.2             | -0.134017534 | 0.073688 | 0.134265 |
| CYP11B2   | 8q24.3             | 0.134015497  | 0.073692 | 0.134265 |
| SYNGR3    | 16p13.3            | -0.13396941  | 0.073792 | 0.134435 |
| MALSU1    | 7p15.3             | 0.133950579  | 0.073833 | 0.134497 |
| EEF1E1    | 6p24.3             | -0.133942209 | 0.073851 | 0.134518 |
| RPL10L    | 14q21.2            | -0.133938135 | 0.07386  | 0.134522 |
| HEBP1     | 12p13.1            | 0.133934956  | 0.073867 | 0.134522 |
| ABHD16B   | 20q13.33           | 0.133921286  | 0.073897 | 0.134564 |
| ARHGEF19  | 1p36.13            | 0.133917101  | 0.073906 | 0.134568 |
| CD163L1   | 12p13.31           | -0.13389827  | 0.073947 | 0.134631 |
| SERBP1    | 1p31.3             | -0.133871069 | 0.074006 | 0.134726 |
| SPDYA     | 2p23.2             | 0.133814575  | 0.074129 | 0.134938 |
| ATG5      | 6q21               | -0.133802021 | 0.074157 | 0.134976 |
| RNF213    | 17q25.3            | -0.133774821 | 0.074216 | 0.135072 |
| CYP2D7    | 22q13.2            | 0.13376129   | 0.074246 | 0.135113 |
| SLC26A5   | 7q22.1             | 0.133756143  | 0.074257 | 0.135121 |
| ENDOG     | 9q34.11            | 0.13374762   | 0.074275 | 0.135136 |
| HPS4      | 22q12.1            | 0.133745528  | 0.07428  | 0.135136 |
| WEE2      | 7q34               | -0.133743094 | 0.074285 | 0.135136 |
| SUGP2     | 19p13.11           | -0.133732973 | 0.074307 | 0.135164 |
| HBM       | 16p13.3            | -0.133718479 | 0.074339 | 0.135209 |
| CFAP57    | 1p34.2             | -0.133703467 | 0.074372 | 0.135257 |
| CD8B      | 2p11.2             | -0.133691126 | 0.074399 | 0.135294 |
| LRRC47    | 1p36.32            | -0.133678572 | 0.074426 | 0.135331 |
| SHOX      | Xp22.33 $\epsilon$ | 0.133648113  | 0.074493 | 0.13544  |
| CALCB     | 11p15.2            | -0.133594579 | 0.07461  | 0.135641 |
| MAK16     | 8p12               | -0.133588601 | 0.074623 | 0.135649 |
| FBH1      | 10p15.1            | -0.133586508 | 0.074628 | 0.135649 |
| CLTA      | 9p13.3             | 0.133573954  | 0.074656 | 0.135686 |
| BORCS8-ME | 19p13.11           | 0.133530015  | 0.074752 | 0.135849 |
| EIF4EBP2  | 10q22.1            | -0.133523738 | 0.074766 | 0.135858 |
| YBX3      | 12p13.2            | 0.133521645  | 0.07477  | 0.135858 |
| MRPL2     | 6p21.1             | 0.133513276  | 0.074789 | 0.135879 |
| MAPRE3    | 2p23.3             | -0.133504907 | 0.074807 | 0.135896 |
| FBF1      | 17q25.1            | -0.133502814 | 0.074812 | 0.135896 |
| TXK       | 4p12               | -0.133493468 | 0.074832 | 0.135921 |
| ZNF197    | 3p21.31            | -0.133486075 | 0.074849 | 0.135938 |
| EIF5A2    | 3q26.2             | 0.133467244  | 0.07489  | 0.135989 |
| SASH3     | Xq26.1             | -0.133467244 | 0.07489  | 0.135989 |
| GALR2     | 17q25.1            | 0.133455173  | 0.074917 | 0.136022 |
| CHST8     | 19q13.11           | -0.133452598 | 0.074922 | 0.136022 |
| HES3      | 1p36.31            | -0.133439475 | 0.074951 | 0.136062 |
| TRANK1    | 3p22.2             | -0.133435859 | 0.074959 | 0.136065 |
| LOC284009 | 17p13.3            | -0.13342807  | 0.074976 | 0.136083 |
| RAB8B     | 15q22.2            | -0.133377273 | 0.075088 | 0.136274 |
| C5ORF56   | 5q31.1             | -0.133345887 | 0.075157 | 0.136387 |

|                    |              |          |          |
|--------------------|--------------|----------|----------|
| C100RF13110q24.1   | -0.133339932 | 0.07517  | 0.136388 |
| ARIH20S 3p21.31    | -0.13333961  | 0.075171 | 0.136388 |
| CA3 8q21.2         | 0.133291486  | 0.075277 | 0.136568 |
| REX1BD 19p13.11    | 0.13326038   | 0.075346 | 0.13668  |
| CRHR2 7p14.3       | -0.133256071 | 0.075356 | 0.136685 |
| FOXI2 10q26.2      | -0.133217913 | 0.07544  | 0.136826 |
| EMC9 14q12         | 0.133193145  | 0.075495 | 0.136913 |
| LRRC73 6p21.1      | -0.133176407 | 0.075532 | 0.136967 |
| AAGAB 15q23        | 0.13317013   | 0.075546 | 0.13698  |
| VMO1 17p13.2       | 0.13316176   | 0.075564 | 0.137001 |
| HSPA6 1q23.3       | 0.133155483  | 0.075578 | 0.137014 |
| ZNF609 15q22.31    | -0.133134559 | 0.075625 | 0.137086 |
| EIF3K 19q13.2      | 0.133080158  | 0.075745 | 0.137291 |
| CRYBA1 17q11.2     | -0.133077417 | 0.075751 | 0.137291 |
| ARIH1 15q24.1      | -0.133073881 | 0.075759 | 0.137292 |
| VSTM1 19q13.42     | 0.133028929  | 0.075859 | 0.137461 |
| PTF1A 10p12.2      | -0.133022492 | 0.075873 | 0.137468 |
| CLDN19 1p34.2      | -0.133020998 | 0.075877 | 0.137468 |
| MC1R 16q24.3       | 0.133017387  | 0.075885 | 0.13747  |
| SIGLEC5 19q13.41   | -0.132988094 | 0.07595  | 0.137576 |
| CGGBP1 3p11.1      | -0.132971356 | 0.075987 | 0.137631 |
| CFLAR 2q33.1       | 0.132960894  | 0.07601  | 0.13766  |
| PNRC2 1p36.11      | -0.132952524 | 0.076029 | 0.137682 |
| MAP3K14-A 17q21.31 | 0.132946247  | 0.076043 | 0.137694 |
| ZMYND15 17p13.2    | 0.132921139  | 0.076099 | 0.137783 |
| IL1F10 2q14.1      | 0.132912338  | 0.076118 | 0.137806 |
| KRTDAP 19q13.12    | 0.132896294  | 0.076154 | 0.137858 |
| CXCR1 2q35         | -0.132889823 | 0.076169 | 0.137872 |
| WASH7P 1p36.33     | 0.132852091  | 0.076253 | 0.138012 |
| HMG20A 15q24.3     | -0.13284163  | 0.076276 | 0.138042 |
| DGCR5 22q11.21     | -0.132801875 | 0.076365 | 0.13819  |
| BBS1 11q13.2       | -0.132766305 | 0.076444 | 0.138321 |
| HCG18 6p22.1       | -0.132757935 | 0.076463 | 0.13833  |
| MRFAP1L1 4p16.1    | -0.132757935 | 0.076463 | 0.13833  |
| SLC6A2 16q12.2     | -0.132733132 | 0.076519 | 0.138418 |
| PRICKLE1 12q12     | -0.13272655  | 0.076533 | 0.138419 |
| LYPD6 2q23.2       | 0.132724458  | 0.076538 | 0.138419 |
| SSTR5 16p13.3      | -0.132723688 | 0.07654  | 0.138419 |
| EGR3 8p21.3        | -0.132711903 | 0.076566 | 0.138454 |
| MRPL41 9q34.3      | 0.132705626  | 0.07658  | 0.138467 |
| PROSER3 19q13.12   | 0.132659595  | 0.076683 | 0.138628 |
| WDR45B 17q25.3     | 0.132659595  | 0.076683 | 0.138628 |
| ATP6VOE1 5q35.1    | 0.13265541   | 0.076693 | 0.138632 |
| SIPA1L1 14q24.2    | 0.132644948  | 0.076716 | 0.138662 |
| CIAPIN1 16q21      | 0.132617747  | 0.076777 | 0.13876  |
| NARF 17q25.3       | 0.132590547  | 0.076838 | 0.138858 |
| BDH1 3q29          | 0.132577993  | 0.076867 | 0.138892 |
| PTPRF 1p34.2       | 0.1325759    | 0.076871 | 0.138892 |
| PMFBP1 16q22.2     | -0.132554    | 0.07692  | 0.138968 |
| ASIC2 17q11.2-c    | -0.132545192 | 0.07694  | 0.138992 |
| WHAMM 15q25.2      | 0.132506852  | 0.077026 | 0.139135 |
| PCOLCE2 3q23       | 0.132481744  | 0.077083 | 0.139224 |
| CYP4F22 19p13.12   | 0.13245521   | 0.077143 | 0.139312 |
| PCGEM1 2q32.3      | -0.132453934 | 0.077146 | 0.139312 |

|           |           |              |          |          |
|-----------|-----------|--------------|----------|----------|
| LIN28B    | 6q16.3-q2 | -0.132450716 | 0.077153 | 0.139313 |
| IFNW1     | 9p21.3    | -0.132427711 | 0.077205 | 0.139394 |
| ENTR1     | 9q34.3    | 0.132421066  | 0.07722  | 0.139408 |
| DBT       | 1p21.2    | -0.132414789 | 0.077234 | 0.139421 |
| HTR2B     | 2q37.1    | 0.132397073  | 0.077274 | 0.139481 |
| ZMYM3     | Xq13.1    | -0.132379219 | 0.077314 | 0.139541 |
| LRR1      | 14q21.3   | 0.132366665  | 0.077342 | 0.139579 |
| NEUROD4   | 12q13.2   | -0.132318337 | 0.077452 | 0.139764 |
| TNP2      | 16p13.13  | -0.132281919 | 0.077534 | 0.1399   |
| DDX3Y     | Yq11.221  | -0.132250297 | 0.077605 | 0.140016 |
| PDE9A     | 21q22.3   | -0.132222292 | 0.077669 | 0.140118 |
| SLC38A1   | 12q13.11  | -0.132213923 | 0.077688 | 0.14014  |
| CRB2      | 9q33.3    | -0.13219827  | 0.077723 | 0.140178 |
| CPO       | 2q33.3    | -0.132198252 | 0.077723 | 0.140178 |
| C3AR1     | 12p13.31  | -0.132195091 | 0.07773  | 0.140179 |
| TLR6      | 4p14      | -0.132180445 | 0.077764 | 0.140226 |
| STARD5    | 15q25.1   | -0.132169983 | 0.077787 | 0.140256 |
| ZYG11A    | 1p32.3    | -0.132155532 | 0.07782  | 0.140302 |
| KIAA1549L | 11p13     | 0.13214069   | 0.077854 | 0.14035  |
| USH1G     | 17q25.1   | -0.132108254 | 0.077927 | 0.14047  |
| SH2B1     | 16p11.2   | 0.132103028  | 0.077939 | 0.140479 |
| SREBF1    | 17p11.2   | 0.132096751  | 0.077954 | 0.140492 |
| SCFD1     | 14q12     | -0.132050719 | 0.078058 | 0.140668 |
| BRSK1     | 19q13.42  | -0.132046534 | 0.078068 | 0.140673 |
| ASAP3     | 1p36.12   | -0.13203398  | 0.078096 | 0.140709 |
| KRTAP10-6 | 21q22.3   | -0.132031537 | 0.078102 | 0.140709 |
| SORCS3    | 10q25.1   | -0.132025346 | 0.078116 | 0.140721 |
| TTC1      | 5q33.3    | 0.132021426  | 0.078125 | 0.140725 |
| LONP1     | 19p13.3   | 0.132015149  | 0.078139 | 0.140738 |
| KCTD13    | 16p11.2   | 0.132010964  | 0.078149 | 0.140742 |
| URB1      | 21q22.11  | -0.13199841  | 0.078177 | 0.140781 |
| B3GLCT    | 13q12.3   | 0.131967024  | 0.078249 | 0.140897 |
| INTS6L    | Xq26.3    | -0.131960747 | 0.078263 | 0.14091  |
| MPHOSPH6  | 16q23.3   | 0.131952378  | 0.078282 | 0.140932 |
| KEL       | 7q34      | -0.131943297 | 0.078303 | 0.140956 |
| NUDT7     | 16q23.1   | -0.131939824 | 0.078311 | 0.140958 |
| MYL5      | 4p16.3    | 0.131906346  | 0.078387 | 0.141083 |
| MED14     | Xp11.4    | -0.131843575 | 0.07853  | 0.141328 |
| FHIT      | 3p14.2    | 0.131816375  | 0.078593 | 0.141414 |
| NFAM1     | 22q13.2   | -0.131816375 | 0.078593 | 0.141414 |
| SELENOK   | 3p21.1    | -0.131772435 | 0.078693 | 0.141583 |
| NIPAL2    | 8q22.2    | -0.131751512 | 0.078741 | 0.141656 |
| KIAA0513  | 16q24.1   | -0.131703388 | 0.078851 | 0.141842 |
| PIGM      | 1q23.2    | -0.131688741 | 0.078885 | 0.141889 |
| STAC      | 3p22.3-p2 | 0.131682464  | 0.078899 | 0.141902 |
| SERINC4   | 15q15.3   | 0.1316282    | 0.079024 | 0.142114 |
| RPS15     | 19p13.3   | 0.131567384  | 0.079164 | 0.142352 |
| ZEB1      | 10p11.22  | -0.131500429 | 0.079318 | 0.142617 |
| PLS3      | Xq23      | 0.131477413  | 0.079371 | 0.142699 |
| ACSF3     | 16q24.3   | 0.131443935  | 0.079448 | 0.142825 |
| VPS41     | 7p14.1    | -0.131389534 | 0.079574 | 0.143038 |
| NP1PB5    | 16p12.2   | 0.131349779  | 0.079666 | 0.14319  |
| SATL1     | Xq21.1    | -0.131307932 | 0.079762 | 0.143351 |
| CCT7      | 2p13.2    | 0.131303747  | 0.079772 | 0.143352 |

|           |            |              |          |          |
|-----------|------------|--------------|----------|----------|
| LINC00663 | 19p13. 11  | -0.131301655 | 0.079777 | 0.143352 |
| PATE1     | 11q24. 2   | -0.131295554 | 0.079791 | 0.143364 |
| ADCY3     | 2p23. 3    | -0.131291193 | 0.079801 | 0.143369 |
| EZH1      | 17q21. 2   | -0.131257716 | 0.079879 | 0.143487 |
| ZNF628    | 19q13. 42  | 0.131255692  | 0.079883 | 0.143487 |
| NWD1      | 19p13. 11  | -0.131253531 | 0.079888 | 0.143487 |
| ZDHC14    | 6q25. 3    | -0.131247254 | 0.079903 | 0.143501 |
| SHISA2    | 13q12. 13  | 0.131222146  | 0.079961 | 0.143592 |
| EGFEM1P   | 3q26. 2    | -0.131198683 | 0.080015 | 0.143665 |
| UGT1A4    | 2q37. 1    | 0.131198505  | 0.080016 | 0.143665 |
| CCR7      | 17q21. 2   | -0.13119076  | 0.080034 | 0.143684 |
| C8ORF76   | 8q24. 13   | 0.131174021  | 0.080073 | 0.143741 |
| C12ORF60  | 12p13. 1-1 | -0.131169837 | 0.080082 | 0.143746 |
| GOLGA6A   | 15q24. 1   | 0.131147083  | 0.080135 | 0.143828 |
| ANKRD1    | 10q23. 31  | 0.131129104  | 0.080177 | 0.14389  |
| ANKRD24   | 19p13. 3   | 0.131117528  | 0.080204 | 0.143925 |
| TRIM71    | 3p22. 3    | -0.131105705 | 0.080231 | 0.143961 |
| ARHGAP42  | 11q22. 1   | 0.131096604  | 0.080253 | 0.143986 |
| WNT2      | 7q31. 2    | 0.131048754  | 0.080364 | 0.144173 |
| C19ORF25  | 19p13. 3   | 0.13104011   | 0.080384 | 0.144196 |
| PGM1      | 1p31. 3    | 0.131029649  | 0.080408 | 0.144227 |
| AK8       | 9q34. 13   | 0.131017095  | 0.080438 | 0.144267 |
| C10RF127  | 1p36. 22   | -0.130994079 | 0.080491 | 0.14435  |
| PMF1      | 1q22       | 0.130962693  | 0.080564 | 0.144468 |
| ANKK1     | 11q23. 2   | 0.130959194  | 0.080573 | 0.14447  |
| TTC14     | 3q26. 33   | 0.130929216  | 0.080643 | 0.144582 |
| RPL36AL   | 14q21. 3   | 0.130891553  | 0.080731 | 0.144727 |
| SMYD2     | 1q32. 3    | 0.130839244  | 0.080853 | 0.144929 |
| ZNF749    | 19q13. 43  | -0.130837152 | 0.080858 | 0.144929 |
| NCBP2     | 3q29       | 0.130830875  | 0.080872 | 0.144942 |
| GNG13     | 16p13. 3   | 0.13082359   | 0.08089  | 0.14496  |
| RPL7A     | 9q34. 2    | -0.130812044 | 0.080917 | 0.144995 |
| CDK5      | 7q36. 1    | 0.130797397  | 0.080951 | 0.14504  |
| ASB16-AS1 | 17q21. 31  | 0.130795305  | 0.080956 | 0.14504  |
| GTF3C2    | 2p23. 3    | 0.130786935  | 0.080975 | 0.145062 |
| RNF144B   | 6p22. 3    | -0.130747181 | 0.081069 | 0.145216 |
| COPA      | 1q23. 2    | -0.130740903 | 0.081083 | 0.145229 |
| FST       | 5q11. 2    | -0.130732534 | 0.081103 | 0.145238 |
| ZAP70     | 2q11. 2    | -0.130732534 | 0.081103 | 0.145238 |
| TNFSF14   | 19p13. 3   | -0.13071505  | 0.081144 | 0.145299 |
| WBP2      | 17q25. 1   | 0.130686502  | 0.081211 | 0.145406 |
| CRLS1     | 20p12. 3   | 0.130659302  | 0.081275 | 0.145507 |
| ATP4B     | 13q34      | -0.130648789 | 0.081299 | 0.145538 |
| BPIFB2    | 20q11. 21  | -0.130643954 | 0.081311 | 0.145545 |
| DIP2B     | 12q13. 12  | -0.130625824 | 0.081353 | 0.145609 |
| CCR8      | 3p22. 1    | -0.130603384 | 0.081406 | 0.14569  |
| TUBA4B    | 2q35       | 0.130596418  | 0.081423 | 0.145696 |
| GFRA1     | 6p12. 1    | -0.130595832 | 0.081424 | 0.145696 |
| SNORA28   | 14q32. 32  | -0.130591871 | 0.081433 | 0.145699 |
| OR4D1     | 17q22      | -0.130584541 | 0.081451 | 0.145717 |
| UFSP2     | 4q35. 1    | -0.130571423 | 0.081481 | 0.145759 |
| HEXIM2    | 17q21. 31  | 0.13054213   | 0.08155  | 0.14587  |
| PCDHB16   | 5q31. 3    | -0.130512837 | 0.081619 | 0.145971 |
| CCL4L1    | 17q12      | -0.130511927 | 0.081622 | 0.145971 |

|            |          |              |          |          |
|------------|----------|--------------|----------|----------|
| RWDD4      | 4q35.1   | -0.130496098 | 0.081659 | 0.146025 |
| COL11A2    | 6p21.32  | 0.130483544  | 0.081689 | 0.146065 |
| GNL3       | 3p21.1   | 0.130475174  | 0.081708 | 0.146087 |
| PLK4       | 4q28.1   | 0.130407241  | 0.081869 | 0.14636  |
| CCNL1      | 3q25.31  | 0.130385203  | 0.081921 | 0.146441 |
| FAM49A     | 2p24.2   | -0.130341263 | 0.082025 | 0.146605 |
| RHAG       | 6p12.3   | -0.130338329 | 0.082032 | 0.146605 |
| TM9SF3     | 10q24.1  | 0.130337079  | 0.082035 | 0.146605 |
| BABAM2     | 2p23.2   | 0.130332894  | 0.082045 | 0.146609 |
| C2ORF78    | 2p13.1   | 0.130290978  | 0.082144 | 0.146774 |
| TBC1D28    | 17p11.2  | -0.130280153 | 0.08217  | 0.1468   |
| PNMA8B     | 19q13.32 | -0.130278493 | 0.082173 | 0.1468   |
| NAAA       | 4q21.1   | -0.130268031 | 0.082198 | 0.146831 |
| PRKAB1     | 12q24.23 | 0.130261754  | 0.082213 | 0.146845 |
| RRAGB      | Xp11.21  | -0.130251292 | 0.082238 | 0.146876 |
| LRRC36     | 16q22.1  | -0.130196891 | 0.082367 | 0.147094 |
| MZT2B      | 2q21.1   | 0.130186429  | 0.082392 | 0.147125 |
| UHMK1      | 1q23.3   | -0.13017806  | 0.082412 | 0.147147 |
| ZNF177     | 19p13.2  | -0.130146674 | 0.082486 | 0.147267 |
| SEC24B     | 4q25     | -0.130140397 | 0.082501 | 0.147281 |
| PCDHGC5    | 5q31.3   | 0.13013628   | 0.082511 | 0.147281 |
| SDHA       | 5p15.33  | 0.13013412   | 0.082516 | 0.147281 |
| GALM       | 2p22.1   | 0.130100642  | 0.082596 | 0.14741  |
| MAP2K7     | 19p13.2  | 0.130092273  | 0.082616 | 0.147432 |
| HPF1       | 4q33     | -0.130071349 | 0.082666 | 0.147495 |
| FHOD1      | 16q22.1  | 0.130071349  | 0.082666 | 0.147495 |
| PCDH11X    | Xq21.31  | -0.130065852 | 0.082679 | 0.147505 |
| SNORA23    | 11p15.4  | -0.130054317 | 0.082706 | 0.147538 |
| HIST1H4G   | 6p22.2   | 0.130051992  | 0.082712 | 0.147538 |
| B3GNT2     | 2p15     | 0.130039964  | 0.08274  | 0.147563 |
| IPO4       | 14q12    | -0.130037872 | 0.082745 | 0.147563 |
| BTK        | Xq22.1   | -0.130035779 | 0.08275  | 0.147563 |
| FBN1       | 15q21.1  | -0.130033687 | 0.082755 | 0.147563 |
| MRPL23-AS1 | 11p15.5  | 0.130012031  | 0.082807 | 0.147642 |
| BCAP29     | 7q22.3   | -0.129973009 | 0.0829   | 0.147795 |
| LINC00882  | 3q13.12  | -0.129963227 | 0.082923 | 0.147823 |
| STK38L     | 12p11.23 | 0.129943716  | 0.08297  | 0.147893 |
| MNS1       | 15q21.3  | 0.129918607  | 0.08303  | 0.147987 |
| COL24A1    | 1p22.3   | -0.129901868 | 0.08307  | 0.148045 |
| RBIS       | 8q21.2   | 0.129889314  | 0.0831   | 0.148085 |
| OGFOD3     | 17q25.3  | -0.129864206 | 0.08316  | 0.148179 |
| TFB2M      | 1q44     | -0.129860089 | 0.08317  | 0.148183 |
| DHTKD1     | 10p14    | -0.129853744 | 0.083185 | 0.148197 |
| ZNF296     | 19q13.32 | 0.12984119   | 0.083215 | 0.148237 |
| PCDHGA11   | 5q31.3   | -0.129837005 | 0.083225 | 0.148242 |
| ENG        | 9q34.11  | -0.129832821 | 0.083235 | 0.148247 |
| GALNT10    | 5q33.2   | 0.129813989  | 0.08328  | 0.14831  |
| TBC1D31    | 8q24.13  | -0.129811897 | 0.083285 | 0.14831  |
| SMIM24     | 19p13.3  | 0.129786789  | 0.083346 | 0.148403 |
| FAM180A    | 7q33     | -0.129767958 | 0.083391 | 0.148457 |
| FTSJ3      | 17q23.3  | 0.129767958  | 0.083391 | 0.148457 |
| KCNF1      | 2p25.1   | -0.129713556 | 0.083521 | 0.148677 |
| FDX2       | 19p13.2  | 0.129648693  | 0.083677 | 0.148941 |
| ZCCHC9     | 5q14.1   | 0.129636139  | 0.083707 | 0.148981 |



|           |            |               |           |           |
|-----------|------------|---------------|-----------|-----------|
| TPT1-AS1  | 13q14. 13  | 0. 129633068  | 0. 083715 | 0. 148981 |
| RGL3      | 19p13. 2   | 0. 129629862  | 0. 083723 | 0. 148982 |
| LRIT2     | 10q23. 1   | -0. 129623055 | 0. 083739 | 0. 148998 |
| GLMP      | 1q22       | 0. 129577553  | 0. 083848 | 0. 149175 |
| IP09      | 1q32. 1    | -0. 129575461 | 0. 083854 | 0. 149175 |
| XRCC2     | 7q36. 1    | 0. 129558722  | 0. 083894 | 0. 149233 |
| CTDSPL2   | 15q15. 3-c | -0. 12954826  | 0. 083919 | 0. 149265 |
| HTN1      | 4q13. 3    | -0. 129542021 | 0. 083934 | 0. 149271 |
| NR5A1     | 9q33. 3    | 0. 129533803  | 0. 083954 | 0. 149271 |
| ZSWIM3    | 20q13. 12  | -0. 129532635 | 0. 083957 | 0. 149271 |
| EIF4A2    | 3q27. 3    | 0. 129531521  | 0. 083959 | 0. 149271 |
| USP49     | 6p21. 1    | -0. 129529429 | 0. 083964 | 0. 149271 |
| AP3S2     | 15q26. 1   | -0. 129527337 | 0. 08397  | 0. 149271 |
| VRK2      | 2p16. 1    | 0. 129525244  | 0. 083975 | 0. 149271 |
| PSG8      | 19q13. 2   | -0. 129514378 | 0. 084001 | 0. 149304 |
| PCDHB12   | 5q31. 3    | -0. 129502228 | 0. 08403  | 0. 149343 |
| SGK2      | 20q13. 12  | 0. 129489674  | 0. 08406  | 0. 149376 |
| CPXCR1    | Xq21. 31   | -0. 129488339 | 0. 084064 | 0. 149376 |
| FAM83C    | 20q11. 22  | 0. 129429629  | 0. 084205 | 0. 149615 |
| RASL11A   | 13q12. 2   | -0. 129416442 | 0. 084237 | 0. 149658 |
| TGFB3     | 14q24. 3   | -0. 129399703 | 0. 084278 | 0. 149717 |
| MYPN      | 10q21. 3   | 0. 129341565  | 0. 084419 | 0. 149953 |
| DACH2     | Xq21. 2    | -0. 129319915 | 0. 084471 | 0. 150033 |
| DKC1      | Xq28       | -0. 129313916 | 0. 084486 | 0. 150046 |
| UTP14C    | 13q14. 3   | -0. 129301362 | 0. 084516 | 0. 150086 |
| ZNF720    | 16p11. 2   | -0. 1292909   | 0. 084541 | 0. 150116 |
| LINC0047C | 18p11. 32  | -0. 129288136 | 0. 084548 | 0. 150116 |
| MST1P2    | 1p36. 13   | 0. 129257423  | 0. 084623 | 0. 150235 |
| PDZRN4    | 12q12      | -0. 129236769 | 0. 084673 | 0. 150311 |
| TYR       | 11q14. 3   | -0. 129226657 | 0. 084697 | 0. 150341 |
| C10RF210  | 1p34. 2    | 0. 12921976   | 0. 084714 | 0. 150358 |
| GSK3A     | 19q13. 2   | 0. 129200929  | 0. 08476  | 0. 150426 |
| RPL26L1   | 5q35. 1    | 0. 129171636  | 0. 084831 | 0. 150539 |
| ELP4      | 11p13      | -0. 129150712 | 0. 084882 | 0. 150611 |
| PPP3CC    | 8p21. 3    | -0. 12914862  | 0. 084887 | 0. 150611 |
| CREB5     | 7p15. 1    | -0. 129117235 | 0. 084963 | 0. 150733 |
| PRAMEF14  | 1p36. 21   | -0. 129099445 | 0. 085007 | 0. 150783 |
| PRAMEF5   | 1p36. 21   | -0. 129099445 | 0. 085007 | 0. 150783 |
| PIK3CA    | 3q26. 32   | -0. 129085849 | 0. 08504  | 0. 150829 |
| CAPZB     | 1p36. 13   | 0. 12907748   | 0. 08506  | 0. 150852 |
| AXL       | 19q13. 2   | 0. 129062833  | 0. 085096 | 0. 150892 |
| TRIM17    | 1q42. 13   | 0. 129061855  | 0. 085098 | 0. 150892 |
| KLRC1     | 12p13. 2   | -0. 129056624 | 0. 085111 | 0. 150902 |
| SLC17A2   | 6p22. 2    | -0. 129052405 | 0. 085121 | 0. 150902 |
| GGNBP2    | 17q12      | 0. 129050279  | 0. 085126 | 0. 150902 |
| IDO2      | 8p11. 21   | -0. 129038415 | 0. 085155 | 0. 150916 |
| PTCH2     | 1p34. 1    | -0. 129037725 | 0. 085157 | 0. 150916 |
| XPNPEP1   | 10q25. 1   | 0. 129037725  | 0. 085157 | 0. 150916 |
| LHFPL4    | 3p25. 3    | -0. 129031448 | 0. 085172 | 0. 15093  |
| C5ORF47   | 5q35. 2    | -0. 129026952 | 0. 085183 | 0. 150936 |
| FKBP10    | 17q21. 2   | 0. 128981232  | 0. 085295 | 0. 151121 |
| PDE4D     | 5q11. 2-q1 | -0. 128960308 | 0. 085346 | 0. 151198 |
| C1GALT1C1 | Xq24       | 0. 128956123  | 0. 085356 | 0. 151198 |
| NBPF14    | 1q21. 2    | -0. 128954031 | 0. 085361 | 0. 151198 |

|           |          |              |          |          |
|-----------|----------|--------------|----------|----------|
| NDEL1     | 17p13.1  | -0.128933107 | 0.085413 | 0.151275 |
| SLC22A23  | 6p25.2   | -0.128897537 | 0.0855   | 0.151416 |
| KRT26     | 17q21.2  | 0.128876401  | 0.085551 | 0.151494 |
| EIF2AK4   | 15q15.1  | -0.128847321 | 0.085623 | 0.151607 |
| KIAA1257  | 3q21.3   | -0.128843136 | 0.085633 | 0.151608 |
| BEND2     | Xp22.13  | -0.128838114 | 0.085645 | 0.151608 |
| PM20D1    | 1q32.1   | -0.128835197 | 0.085652 | 0.151608 |
| TRIM69    | 15q21.1  | 0.128834767  | 0.085653 | 0.151608 |
| SPESP1    | 15q23    | -0.128815935 | 0.085699 | 0.151676 |
| POFUT2    | 21q22.3  | 0.128805474  | 0.085725 | 0.151708 |
| SIGLEC12  | 19q13.41 | 0.128790827  | 0.085761 | 0.151758 |
| ZNF80     | 3q13.31  | -0.128743266 | 0.085878 | 0.151951 |
| ABCC12    | 16q12.1  | -0.128726723 | 0.085918 | 0.152009 |
| ADAMTS9   | 3p14.1   | -0.128700856 | 0.085982 | 0.152108 |
| CCN4      | 8q24.22  | -0.128688302 | 0.086013 | 0.15215  |
| SEPTIN7   | 7p14.2   | -0.12866947  | 0.086059 | 0.152218 |
| KIAA1107  | 1p22.1   | -0.128661101 | 0.08608  | 0.152241 |
| OSTCP1    | 6q25.3   | -0.128652732 | 0.0861   | 0.152264 |
| DCHS2     | 4q31.3   | -0.128637106 | 0.086139 | 0.152318 |
| EPN2      | 17p11.2  | -0.128631808 | 0.086152 | 0.152328 |
| ETV3L     | 1q23.1   | -0.128627847 | 0.086162 | 0.152332 |
| DGKB      | 7p21.2   | -0.128623439 | 0.086172 | 0.152338 |
| MADCAM1   | 19p13.3  | -0.128596238 | 0.086239 | 0.152442 |
| SH3BP5    | 3p25.1   | -0.128569037 | 0.086306 | 0.152534 |
| TAF7      | 5q31.3   | 0.128569037  | 0.086306 | 0.152534 |
| DUS4L     | 7q22.3   | 0.128520913  | 0.086425 | 0.15273  |
| FAM193B   | 5q35.3   | 0.128514636  | 0.086441 | 0.152744 |
| MFSD9     | 2q12.1   | 0.12849999   | 0.086477 | 0.152795 |
| ZNF676    | 19p12    | -0.128490872 | 0.086499 | 0.152821 |
| LINC00488 | 3q13.13  | -0.128463487 | 0.086567 | 0.152927 |
| FKBP7     | 2q31.2   | -0.128460235 | 0.086575 | 0.152928 |
| PLOD1     | 1p36.22  | 0.128451865  | 0.086596 | 0.152951 |
| ZNF528    | 19q13.41 | 0.12842048   | 0.086673 | 0.153074 |
| ASB14     | 3p14.3   | -0.128388116 | 0.086753 | 0.153202 |
| PCDHAC2   | 5q31.3   | -0.128361894 | 0.086818 | 0.153303 |
| SLC18A3   | 10q11.23 | -0.128343872 | 0.086863 | 0.153369 |
| EMILIN2   | 18p11.32 | -0.128320047 | 0.086922 | 0.153459 |
| IFT172    | 2p23.3   | 0.128307493  | 0.086953 | 0.153501 |
| HIST2H3D  | 1q21.2   | 0.128301879  | 0.086967 | 0.153512 |
| TICAM2    | 5q22.3   | 0.128274015  | 0.087036 | 0.15362  |
| TNFAIP1   | 17q11.2  | 0.128253091  | 0.087088 | 0.153685 |
| SAMD1     | 19p13.12 | 0.128253091  | 0.087088 | 0.153685 |
| LINC02685 | 11p11.2  | -0.128238815 | 0.087124 | 0.153721 |
| HBA1      | 16p13.3  | -0.128238691 | 0.087124 | 0.153721 |
| DEFB109B  | 8p23.1   | 0.128205611  | 0.087206 | 0.153851 |
| ZNF226    | 19q13.31 | 0.128200783  | 0.087218 | 0.153851 |
| SNORA13   | 5q22.1   | -0.128199776 | 0.087221 | 0.153851 |
| HOXD8     | 2q31.1   | -0.128179859 | 0.08727  | 0.153916 |
| GPRC5B    | 16p12.3  | 0.128177767  | 0.087275 | 0.153916 |
| TCF21     | 6q23.2   | -0.128175674 | 0.087281 | 0.153916 |
| SLC51A    | 3q29     | 0.128161028  | 0.087317 | 0.153966 |
| CIRBP     | 19p13.3  | -0.128156843 | 0.087328 | 0.153971 |
| CD48      | 1q23.3   | -0.128131735 | 0.08739  | 0.154068 |
| C22ORF34  | 22q13.33 | -0.128040331 | 0.087618 | 0.154456 |

|           |           |              |          |          |
|-----------|-----------|--------------|----------|----------|
| DNAJC3    | 13q32.1   | -0.128016655 | 0.087677 | 0.154546 |
| FBX032    | 8q24.13   | 0.127981085  | 0.087766 | 0.154689 |
| RAB33A    | Xq26.1    | -0.127967552 | 0.0878   | 0.154735 |
| HCP5      | 6p21.33   | 0.127962254  | 0.087813 | 0.15474  |
| SSR2      | 1q22      | 0.127960162  | 0.087818 | 0.15474  |
| TMEM145   | 19q13.2   | -0.127945582 | 0.087855 | 0.154791 |
| RASSF3    | 12q14.2   | -0.127922499 | 0.087912 | 0.154879 |
| LMCD1     | 3p25.3    | -0.127916222 | 0.087928 | 0.154893 |
| TSFM      | 12q14.1   | -0.127909945 | 0.087944 | 0.154907 |
| CLIC4     | 1p36.11   | -0.127886929 | 0.088001 | 0.154995 |
| ENTPD4    | 8p21.3    | -0.127866005 | 0.088054 | 0.155069 |
| NUP50     | 22q13.31  | -0.127861821 | 0.088064 | 0.155069 |
| TOMM40L   | 1q23.3    | 0.127855544  | 0.08808  | 0.155069 |
| ZNF444    | 19q13.43  | 0.127855544  | 0.08808  | 0.155069 |
| MAEL      | 1q24.1    | 0.127854789  | 0.088082 | 0.155069 |
| WDYHV1    | 8q24.13   | 0.127849267  | 0.088096 | 0.155079 |
| LCLAT1    | 2p23.1    | 0.127830435  | 0.088143 | 0.155149 |
| TMEM116   | 12q24.12  | -0.127803235 | 0.088211 | 0.155255 |
| PLIN4     | 19p13.3   | -0.127788588 | 0.088248 | 0.155306 |
| DTWD1     | 15q21.2   | -0.127782311 | 0.088264 | 0.15532  |
| ULK3      | 15q24.1   | 0.127776034  | 0.088279 | 0.155334 |
| DTNBP1    | 6p22.3    | -0.127767665 | 0.0883   | 0.155357 |
| LRRD1     | 7q21.2    | -0.127756134 | 0.088329 | 0.155395 |
| PKN2      | 1p22.2    | 0.127725818  | 0.088406 | 0.155515 |
| MTTP      | 4q23      | -0.127696716 | 0.088479 | 0.15563  |
| SLA       | 8q24.22   | -0.127663047 | 0.088563 | 0.155757 |
| OR8D4     | 11q24.1   | -0.127661944 | 0.088566 | 0.155757 |
| SCARNA12  | 12p13.31  | -0.127658217 | 0.088576 | 0.155759 |
| DAOA      | 13q33.2 1 | 0.127648889  | 0.088599 | 0.155773 |
| LINC00293 | 8q11.1    | 0.127648889  | 0.088599 | 0.155773 |
| SNORA71C  | 20q11.23  | 0.127645904  | 0.088607 | 0.155773 |
| PJVK      | 2q31.2    | 0.127619174  | 0.088674 | 0.155877 |
| COBL      | 7p12.1    | -0.127614923 | 0.088685 | 0.155883 |
| RANGRF    | 17p13.1   | -0.127608646 | 0.0887   | 0.155897 |
| TMCO2     | 1p34.2    | -0.127549721 | 0.088849 | 0.156144 |
| DPYSL3    | 5q32      | -0.12751449  | 0.088938 | 0.156287 |
| VPS13A    | 9q21.2    | -0.127493566 | 0.088991 | 0.156352 |
| MAT2A     | 2p11.2    | 0.127493566  | 0.088991 | 0.156352 |
| DTX3      | 12q13.3   | -0.12747055  | 0.089049 | 0.15644  |
| CPN1      | 10q24.2   | -0.127445605 | 0.089112 | 0.156538 |
| NACA      | 12q13.3   | 0.12743498   | 0.089139 | 0.156567 |
| C16ORF70  | 16q22.1   | -0.127432888 | 0.089144 | 0.156567 |
| C10RF94   | 1p35.1    | 0.127428938  | 0.089154 | 0.15657  |
| MAGEB16   | Xp21.1    | 0.127420552  | 0.089175 | 0.156591 |
| TRMT5     | 14q23.1   | -0.127417262 | 0.089184 | 0.156591 |
| WDCP      | 2p23.3    | -0.127414056 | 0.089192 | 0.156591 |
| PCNX3     | 11q13.1   | 0.127411964  | 0.089197 | 0.156591 |
| THBD      | 20p11.21  | -0.127401502 | 0.089224 | 0.156623 |
| SCN1A     | 2q24.3    | -0.127370186 | 0.089303 | 0.156731 |
| ZHX2      | 8q24.13   | -0.127370117 | 0.089303 | 0.156731 |
| MCFD2     | 2p21      | -0.127368025 | 0.089309 | 0.156731 |
| CACNG8    | 19q13.42  | 0.127362583  | 0.089322 | 0.156741 |
| KDM2A     | 11q13.2   | 0.12728433   | 0.089521 | 0.157076 |
| TM2D3     | 15q26.3   | -0.127273869 | 0.089547 | 0.157109 |

|           |           |              |          |          |
|-----------|-----------|--------------|----------|----------|
| CA6       | 1p36. 23  | -0.127270509 | 0.089556 | 0.15711  |
| ZNF738    | 19p12     | -0.12720698  | 0.089717 | 0.157379 |
| CCL23     | 17q12     | -0.127179393 | 0.089788 | 0.157489 |
| SYCE2     | 19p13. 13 | 0.127169517  | 0.089813 | 0.157519 |
| TTLL6     | 17q21. 32 | -0.127140024 | 0.089888 | 0.157637 |
| LSM10     | 1p34. 3   | -0.127102295 | 0.089984 | 0.157792 |
| BAMBI     | 10p12. 1  | -0.127062541 | 0.090085 | 0.157955 |
| COL4A6    | Xq22. 3   | -0.127014416 | 0.090208 | 0.158157 |
| DNAJA2    | 16q11. 2  | 0.127010232  | 0.090219 | 0.158162 |
| DDX47     | 12p13. 1  | 0.126953738  | 0.090363 | 0.158401 |
| MCPH1     | 8p23. 1   | -0.126945369 | 0.090385 | 0.158416 |
| FAM182A   | 20p11. 1  | -0.126944206 | 0.090388 | 0.158416 |
| SYCE1L    | 16q23. 1  | 0.126933161  | 0.090416 | 0.158452 |
| RPS20     | 8q12. 1   | 0.126926537  | 0.090433 | 0.158468 |
| CBWD1     | 9p24. 3   | -0.126922353 | 0.090444 | 0.158472 |
| EFHC2     | Xp11. 3   | -0.126915096 | 0.090462 | 0.158491 |
| OLFML2A   | 9q33. 3   | -0.126903521 | 0.090492 | 0.158529 |
| PLA2G1B   | 12q24. 31 | -0.126863298 | 0.090595 | 0.158675 |
| TREX2     | Xq28      | 0.126862338  | 0.090597 | 0.158675 |
| LINC00312 | 3p25. 3   | -0.126861674 | 0.090599 | 0.158675 |
| EXPH5     | 11q22. 3  | 0.126832381  | 0.090674 | 0.158793 |
| GJA1      | 6q22. 31  | -0.126798904 | 0.09076  | 0.158915 |
| SELL      | 1q24. 2   | -0.126798904 | 0.09076  | 0.158915 |
| NMRK2     | 19p13. 3  | -0.126788612 | 0.090786 | 0.158935 |
| FAM76A    | 1p35. 3   | -0.126788442 | 0.090787 | 0.158935 |
| CHKA      | 11q13. 2  | 0.126780072  | 0.090808 | 0.158958 |
| HCCS      | Xp22. 2   | 0.126736133  | 0.090921 | 0.159142 |
| ZNF556    | 19p13. 3  | -0.126727584 | 0.090943 | 0.159166 |
| EIF5A     | 17p13. 1  | 0.126711025  | 0.090986 | 0.159227 |
| SBF2      | 11p15. 4  | -0.126683824 | 0.091056 | 0.159335 |
| LOC728392 | 17p13. 2  | -0.126637792 | 0.091174 | 0.159529 |
| STX11     | 6q24. 2   | -0.126633607 | 0.091185 | 0.159534 |
| OR4A47    | 11p11. 2  | -0.126627851 | 0.0912   | 0.159546 |
| MCUR1     | 6p23      | -0.126618961 | 0.091223 | 0.159546 |
| SLC43A1   | 11q12. 1  | -0.126618961 | 0.091223 | 0.159546 |
| MAGEB2    | Xp21. 2   | -0.126618577 | 0.091224 | 0.159546 |
| SNHG3     | 1p35. 3   | 0.126566652  | 0.091358 | 0.159766 |
| HBA2      | 16p13. 3  | -0.126549913 | 0.091401 | 0.159827 |
| HSF4      | 16q22. 1  | 0.126539451  | 0.091428 | 0.159856 |
| PCDHGA1   | 5q31. 3   | -0.126537359 | 0.091433 | 0.159856 |
| CCT8      | 21q21. 3  | 0.126514343  | 0.091493 | 0.159944 |
| DYTN      | 2q33. 3   | -0.126511687 | 0.0915   | 0.159944 |
| ALKBH7    | 19p13. 3  | 0.126501789  | 0.091525 | 0.159975 |
| TEAD4     | 12p13. 33 | 0.12648505   | 0.091568 | 0.160036 |
| A4GALT    | 22q13. 2  | 0.126464127  | 0.091622 | 0.160117 |
| CYHR1     | 8q24. 3   | 0.126407633  | 0.091769 | 0.160358 |
| ANTXR1    | 10q11. 22 | 0.126385237  | 0.091827 | 0.160446 |
| RNF43     | 17q22     | 0.12637834   | 0.091845 | 0.160463 |
| SPIRE1    | 18p11. 21 | -0.126372063 | 0.091861 | 0.160473 |
| CLPB      | 11q13. 4  | -0.12636997  | 0.091866 | 0.160473 |
| RRP7A     | 22q13. 2  | 0.126315569  | 0.092007 | 0.160701 |
| TRMU      | 22q13. 31 | -0.126313477 | 0.092013 | 0.160701 |
| SSR3      | 3q25. 31  | -0.126290461 | 0.092072 | 0.160791 |
| C20ORF85  | 20q13. 32 | 0.126284063  | 0.092089 | 0.160806 |

|           |           |              |          |          |
|-----------|-----------|--------------|----------|----------|
| UQCRC2    | 16p12.2   | 0.126266465  | 0.092135 | 0.160872 |
| EFCAB10   | 7q22.3    | -0.126225598 | 0.092241 | 0.161043 |
| SPDYE5    | 7q11.23   | -0.126210951 | 0.092279 | 0.161095 |
| ZNF219    | 14q11.2   | 0.126202582  | 0.092301 | 0.161096 |
| CD68      | 17p13.1   | 0.12620049   | 0.092306 | 0.161096 |
| FAM197Y2  | Yp11.2    | -0.126198334 | 0.092312 | 0.161096 |
| LYZL1     | 10p12.1-1 | -0.126198334 | 0.092312 | 0.161096 |
| POMZP3    | 7q11.23   | 0.126187935  | 0.092339 | 0.161111 |
| PITHD1    | 1p36.11   | -0.126185843 | 0.092344 | 0.161111 |
| SLC1A3    | 5p13.2    | -0.126185843 | 0.092344 | 0.161111 |
| MRPL3     | 3q22.1    | 0.126179566  | 0.092361 | 0.161125 |
| DIS3      | 13q21.33  | 0.126169104  | 0.092388 | 0.161159 |
| DSTN      | 20p12.1   | -0.126162827 | 0.092404 | 0.161173 |
| FARP1     | 13q32.2   | 0.126150273  | 0.092437 | 0.161216 |
| TSG1      | 6q16.1    | -0.126135104 | 0.092476 | 0.161271 |
| KCNT1     | 9q34.3    | -0.126120245 | 0.092515 | 0.161325 |
| LINC00467 | 1q32.3    | 0.126106334  | 0.092551 | 0.161374 |
| NOC4L     | 12q24.33  | 0.126102149  | 0.092562 | 0.161379 |
| CCL3L1    | 17q21.1   | -0.12607606  | 0.09263  | 0.161466 |
| NHEG1     | 6q23.3    | -0.126076046 | 0.09263  | 0.161466 |
| CALHM4    | 6q22.1    | -0.126073638 | 0.092637 | 0.161466 |
| SNRNP200  | 2q11.2    | -0.126064486 | 0.092661 | 0.161494 |
| URAHF     | 16q24.3   | 0.125993346  | 0.092846 | 0.161798 |
| CRP       | 1q23.2    | 0.125991468  | 0.092851 | 0.161798 |
| CCDC163   | 1p34.1    | -0.125985043 | 0.092868 | 0.161813 |
| TACR2     | 10q22.1   | 0.125974515  | 0.092896 | 0.161847 |
| TUT1      | 11q12.3   | 0.125968238  | 0.092912 | 0.161861 |
| RGCC      | 13q14.11  | -0.125940057 | 0.092986 | 0.161966 |
| AQP1      | 7p14.3    | -0.125938945 | 0.092989 | 0.161966 |
| RING1     | 6p21.32   | 0.125924299  | 0.093027 | 0.162014 |
| NCR3      | 6p21.33   | -0.125922206 | 0.093032 | 0.162014 |
| MYBL1     | 8q13.1    | -0.12583642  | 0.093257 | 0.162392 |
| PLA2G4A   | 1q31.1    | 0.125798757  | 0.093356 | 0.162536 |
| TBCK      | 4q24      | -0.125798757 | 0.093356 | 0.162536 |
| ANKRD19P  | 9q22.31   | 0.12579248   | 0.093373 | 0.16255  |
| ANAPC16   | 10q22.1   | -0.125752725 | 0.093477 | 0.162718 |
| TMC03     | 13q34     | -0.125738079 | 0.093515 | 0.162771 |
| PRPF40A   | 2q23.3    | 0.125731802  | 0.093532 | 0.162785 |
| PLGRKT    | 9p24.1    | 0.125727617  | 0.093543 | 0.16279  |
| FZD5      | 2q33.3    | 0.125717155  | 0.09357  | 0.162824 |
| PGA4      | 11q12.2   | -0.125678968 | 0.093671 | 0.162984 |
| TLK2      | 17q23.2   | -0.12564183  | 0.093769 | 0.16314  |
| MAGEA5    | Xq28      | 0.125623355  | 0.093817 | 0.163211 |
| LINC00092 | 9q22.32   | -0.125576967 | 0.09394  | 0.163409 |
| HIST1H3I  | 6p22.1    | 0.125569145  | 0.09396  | 0.163431 |
| IIFT80    | 3q25.33   | -0.125560228 | 0.093984 | 0.163458 |
| HYAL2     | 3p21.31   | 0.125553951  | 0.094    | 0.163472 |
| FBX025    | 8p23.3    | -0.125547674 | 0.094017 | 0.163487 |
| RABAC1    | 19q13.2   | 0.125489088  | 0.094172 | 0.163742 |
| PNPO      | 17q21.32  | 0.125459795  | 0.094249 | 0.163855 |
| KCNK9     | 8q24.3    | -0.125456923 | 0.094257 | 0.163855 |
| SLC25A51F | 11p15.1   | -0.125455058 | 0.094262 | 0.163855 |
| PDCD11    | 10q24.33  | -0.125440964 | 0.094299 | 0.163906 |
| CCR9      | 3p21.31   | 0.125416512  | 0.094364 | 0.164004 |

|           |              |               |           |           |
|-----------|--------------|---------------|-----------|-----------|
| KPNA4     | 3q25. 33     | 0. 125407486  | 0. 094388 | 0. 164032 |
| ADAMTS20  | 12q12        | 0. 125394113  | 0. 094423 | 0. 164079 |
| WNT5B     | 12p13. 33    | 0. 125382378  | 0. 094454 | 0. 164119 |
| HDAC9     | 7p21. 1      | -0. 125350993 | 0. 094537 | 0. 164249 |
| LIG4      | 13q33. 3     | -0. 1253217   | 0. 094615 | 0. 16437  |
| BGLAP     | 1q22         | 0. 125292407  | 0. 094693 | 0. 16449  |
| SAP30     | 4q34. 1      | -0. 125284037 | 0. 094715 | 0. 164505 |
| ADGRG3    | 16q21        | -0. 125283057 | 0. 094718 | 0. 164505 |
| CTNNB1    | 3p22. 1      | 0. 125279853  | 0. 094726 | 0. 164505 |
| RGSL1     | 1q25. 3      | -0. 125261065 | 0. 094776 | 0. 164578 |
| GTF2F1    | 19p13. 3     | 0. 125256837  | 0. 094787 | 0. 164583 |
| IQCC      | 1p35. 2      | -0. 125240098 | 0. 094832 | 0. 164646 |
| LINC01002 | 19p13. 3     | 0. 125235913  | 0. 094843 | 0. 164651 |
| LOC100133 | 5q21. 1      | -0. 125217872 | 0. 094891 | 0. 16472  |
| STRA8     | 7q33         | 0. 125197733  | 0. 094944 | 0. 164798 |
| DBX2      | 12q12        | -0. 125154727 | 0. 095059 | 0. 164983 |
| RWDD2B    | 21q21. 3     | 0. 125140776  | 0. 095096 | 0. 165033 |
| DOCK3     | 3p21. 2      | -0. 125137572 | 0. 095105 | 0. 165033 |
| PBOV1     | 6q23. 3      | -0. 125128321 | 0. 095129 | 0. 165044 |
| COX6C     | 8q22. 2      | 0. 125127111  | 0. 095132 | 0. 165044 |
| FBX06     | 1p36. 22     | 0. 125122926  | 0. 095144 | 0. 165044 |
| USP18     | 22q11. 21    | 0. 125122926  | 0. 095144 | 0. 165044 |
| LOC642846 | 12p13. 31    | 0. 125049693  | 0. 095339 | 0. 165368 |
| ZBTB44    | 11q24. 3     | -0. 125037139 | 0. 095372 | 0. 165398 |
| EVI2B     | 17q11. 2     | -0. 125037139 | 0. 095372 | 0. 165398 |
| ACTN1     | 14q24. 1   1 | 0. 125032955  | 0. 095384 | 0. 165403 |
| NR2E1     | 6q21         | 0. 125014484  | 0. 095433 | 0. 165474 |
| FKRP      | 19q13. 32    | -0. 124997385 | 0. 095479 | 0. 165539 |
| RPS21     | 20q13. 33    | 0. 124989015  | 0. 095501 | 0. 165563 |
| CRELD2    | 22q13. 33    | -0. 12498483  | 0. 095512 | 0. 165568 |
| SRRM3     | 7q11. 23     | -0. 124955537 | 0. 09559  | 0. 165685 |
| PKIB      | 6q22. 31     | -0. 124953445 | 0. 095596 | 0. 165685 |
| CCDC88A   | 2p16. 1      | -0. 124942983 | 0. 095624 | 0. 165714 |
| PYCR1     | 17q25. 3     | 0. 124940891  | 0. 09563  | 0. 165714 |
| ATP5F1E   | 20q13. 32    | 0. 124934614  | 0. 095646 | 0. 165729 |
| UBXN6     | 19p13. 3     | 0. 12492206   | 0. 09568  | 0. 165773 |
| PSTPIP1   | 15q24. 3     | -0. 124907413 | 0. 095719 | 0. 165827 |
| VNN1      | 6q23. 2      | 0. 124903229  | 0. 09573  | 0. 165832 |
| RCN3      | 19q13. 33    | 0. 124890674  | 0. 095764 | 0. 165875 |
| TBX20     | 7p14. 2      | 0. 124863983  | 0. 095836 | 0. 165985 |
| HOOK3     | 8p11. 21     | -0. 124857197 | 0. 095854 | 0. 165988 |
| KALRN     | 3q21. 1-q2   | 0. 124857197  | 0. 095854 | 0. 165988 |
| TMEM119   | 12q23. 3     | -0. 124846735 | 0. 095882 | 0. 166022 |
| RAB42     | 1p35. 3      | 0. 124841569  | 0. 095896 | 0. 166022 |
| SSB       | 2q31. 1      | 0. 124840458  | 0. 095899 | 0. 166022 |
| CABP1     | 12q24. 31    | -0. 124827904 | 0. 095932 | 0. 166066 |
| HCN2      | 19p13. 3     | -0. 124792334 | 0. 096028 | 0. 166217 |
| FOXI1     | 5q35. 1      | 0. 124776647  | 0. 09607  | 0. 166276 |
| TAF8      | 6p21. 1      | -0. 124767225 | 0. 096095 | 0. 166305 |
| NEK8      | 17q11. 2     | 0. 124763041  | 0. 096106 | 0. 16631  |
| FUOM      | 10q26. 3     | 0. 124752579  | 0. 096135 | 0. 166338 |
| LCE2D     | 1q21. 3      | -0. 124747778 | 0. 096147 | 0. 166338 |
| LCE6A     | 1q21. 3      | -0. 124747778 | 0. 096147 | 0. 166338 |
| ZNF511    | 10q26. 3     | 0. 124687716  | 0. 096309 | 0. 166603 |

|           |           |               |           |           |
|-----------|-----------|---------------|-----------|-----------|
| ZSCAN1    | 19q13. 43 | -0. 12468285  | 0. 096322 | 0. 166611 |
| FTL       | 19q13. 33 | 0. 124675162  | 0. 096343 | 0. 166632 |
| KRTAP26-1 | 21q22. 11 | 0. 12465867   | 0. 096387 | 0. 166691 |
| TNP02     | 19p13. 13 | -0. 12465633  | 0. 096393 | 0. 166691 |
| TIMM10B   | 11p15. 4  | -0. 124635407 | 0. 09645  | 0. 16677  |
| CHML      | 1q43      | 0. 124633315  | 0. 096455 | 0. 16677  |
| TPM3P9    | 19q13. 42 | -0. 12462913  | 0. 096467 | 0. 166775 |
| NDNF      | 4q27      | 0. 124606114  | 0. 096529 | 0. 166867 |
| ZMYM2     | 13q12. 11 | 0. 124589375  | 0. 096574 | 0. 166931 |
| LXN       | 3q25. 32  | -0. 124539158 | 0. 096709 | 0. 167151 |
| CDH17     | 8q22. 1   | 0. 124530789  | 0. 096732 | 0. 167175 |
| TRIM63    | 1p36. 11  | -0. 124491318 | 0. 096839 | 0. 167345 |
| RMND5A    | 2p11. 2   | 0. 124484757  | 0. 096856 | 0. 167361 |
| ARMC5     | 16p11. 2  | -0. 124470111 | 0. 096896 | 0. 167415 |
| NPC1L1    | 7p13      | 0. 124447095  | 0. 096958 | 0. 167508 |
| LOC391343 | 2p25. 3   | -0. 124411107 | 0. 097056 | 0. 167662 |
| HNRNPDL   | 4q21. 22  | 0. 124375955  | 0. 097151 | 0. 167812 |
| VSX2      | 14q24. 3  | -0. 124335209 | 0. 097261 | 0. 167988 |
| SNORA55   | 1p34. 3   | -0. 124323724 | 0. 097292 | 0. 168028 |
| MR1       | 1q25. 3   | 0. 124302722  | 0. 097349 | 0. 168111 |
| OR52N2    | 11p15. 4  | 0. 124273671  | 0. 097428 | 0. 168233 |
| CTNNA3    | 10q21. 3  | -0. 124269122 | 0. 097441 | 0. 16824  |
| TMX2      | 11q12. 1  | 0. 124254598  | 0. 09748  | 0. 168293 |
| WDR97     | 8q24. 3   | 0. 124246229  | 0. 097503 | 0. 168318 |
| PHF19     | 9q33. 2   | -0. 124242044 | 0. 097514 | 0. 168322 |
| OR1F1     | 16p13. 3  | -0. 124239238 | 0. 097522 | 0. 168322 |
| GDF1      | 19p13. 11 | -0. 124225582 | 0. 097559 | 0. 168371 |
| IFT43     | 14q24. 3  | 0. 124216936  | 0. 097582 | 0. 168393 |
| FAM50A    | Xq28      | 0. 124214843  | 0. 097588 | 0. 168393 |
| NHLRC1    | 6p22. 3   | -0. 124208566 | 0. 097605 | 0. 168408 |
| CLEC17A   | 19p13. 12 | -0. 124192022 | 0. 09765  | 0. 168471 |
| HIP1      | 7q11. 23  | -0. 124183458 | 0. 097673 | 0. 168496 |
| TUBBP6    | 7p11. 2   | -0. 124177373 | 0. 09769  | 0. 168507 |
| PLCB2     | 15q15. 1  | 0. 124175088  | 0. 097696 | 0. 168507 |
| SLC45A2   | 5p13. 2   | -0. 124158196 | 0. 097742 | 0. 168571 |
| RSPH10B2  | 7p22. 1   | -0. 12415154  | 0. 09776  | 0. 168588 |
| CLLU10S   | 12q22     | 0. 124135266  | 0. 097805 | 0. 16865  |
| NACAD     | 7p13      | -0. 124129057 | 0. 097822 | 0. 168665 |
| AMPD3     | 11p15. 4  | -0. 124083025 | 0. 097947 | 0. 168862 |
| SMG7      | 1q25. 3   | 0. 124080932  | 0. 097953 | 0. 168862 |
| CACNA2D4  | 12p13. 33 | 0. 124051639  | 0. 098033 | 0. 168985 |
| KTI12     | 1p32. 3   | -0. 124020254 | 0. 098118 | 0. 169118 |
| RAX       | 18q21. 32 | 0. 123993861  | 0. 09819  | 0. 169228 |
| FBX022    | 15q24. 2  | 0. 12397213   | 0. 09825  | 0. 169315 |
| GNAT1     | 3p21. 31  | -0. 123961693 | 0. 098278 | 0. 169345 |
| RBM3      | Xp11. 23  | 0. 123959576  | 0. 098284 | 0. 169345 |
| SOSTDC1   | 7p21. 2   | 0. 123947281  | 0. 098318 | 0. 169375 |
| TADA1     | 1q24. 1   | -0. 123947022 | 0. 098318 | 0. 169375 |
| SLC2A10   | 20q13. 12 | 0. 123942837  | 0. 09833  | 0. 16938  |
| SUPV3L1   | 10q22. 1  | -0. 123896805 | 0. 098456 | 0. 169568 |
| TMEM168   | 7q31. 1   | -0. 123896805 | 0. 098456 | 0. 169568 |
| DACT2     | 6q27      | -0. 123882158 | 0. 098496 | 0. 169608 |
| KCNH8     | 3p24. 3   | 0. 123877974  | 0. 098507 | 0. 169608 |
| RNASE6    | 14q11. 2  | -0. 123875881 | 0. 098513 | 0. 169608 |

|           |           |              |          |          |
|-----------|-----------|--------------|----------|----------|
| SAX01     | 9p22.1    | -0.123875846 | 0.098513 | 0.169608 |
| SPDYE8P   | 7q11.23   | 0.12386542   | 0.098542 | 0.169643 |
| SLC29A3   | 10q22.1   | 0.123852865  | 0.098576 | 0.169679 |
| OR1L4     | 9q33.2    | -0.123851509 | 0.09858  | 0.169679 |
| RPL23A    | 17q11.2   | 0.123846588  | 0.098593 | 0.169688 |
| FCN1      | 9q34.3    | -0.123756617 | 0.09884  | 0.170098 |
| 2-Mar     | 19p13.2   | 0.123610152  | 0.099243 | 0.170777 |
| AOC3      | 17q21.31  | -0.123601783 | 0.099266 | 0.170802 |
| LSMEM2    | 3p21.31   | 0.123597071  | 0.099279 | 0.17081  |
| SLC6A15   | 12q21.31  | -0.123546507 | 0.099419 | 0.171035 |
| ELP3      | 8p21.1    | -0.123541104 | 0.099434 | 0.171046 |
| LARP7     | 4q25      | -0.123513904 | 0.099509 | 0.17116  |
| POLR2I    | 19q13.12  | 0.123497165  | 0.099555 | 0.171225 |
| PIGX      | 3q29      | -0.123484611 | 0.09959  | 0.17127  |
| PRG3      | 11q12.1   | 0.123473392  | 0.099621 | 0.171308 |
| ASMTL-AS1 | Xp22.33   | 0.123461595  | 0.099653 | 0.17135  |
| RALGDS    | 9q34.13-c | -0.123413471 | 0.099786 | 0.171555 |
| GINS4     | 8p11.21   | 0.123409286  | 0.099798 | 0.171555 |
| SNORD115  | 15q11.2   | -0.123405992 | 0.099807 | 0.171555 |
| SLC2A9    | 4p16.1    | -0.123403009 | 0.099815 | 0.171555 |
| UVRAG     | 11q13.5   | -0.123403009 | 0.099815 | 0.171555 |
| DEFB124   | 20q11.21  | -0.123386109 | 0.099862 | 0.17162  |
| ZNF710    | 15q26.1   | -0.123354885 | 0.099949 | 0.171754 |
| FOXE3     | 1p33      | 0.123349083  | 0.099965 | 0.171767 |
| RAB9A     | Xp22.2    | 0.123338146  | 0.099995 | 0.171804 |
| TRMT1L    | 1q25.3    | -0.123310945 | 0.10007  | 0.171919 |
| AGAP4     | 10q11.22  | 0.12330676   | 0.100082 | 0.171924 |
| TECRL     | 4q13.1    | 0.123297223  | 0.100108 | 0.171955 |
| CLEC4F    | 2p13.3    | -0.123273526 | 0.100174 | 0.172053 |
| MGP       | 12p12.3   | -0.123241897 | 0.100262 | 0.172189 |
| CUL9      | 6p21.1    | -0.123210512 | 0.100349 | 0.172324 |
| EGLN1     | 1q42.2    | -0.12320005  | 0.100378 | 0.172355 |
| CHERP     | 19p13.11  | 0.123197958  | 0.100384 | 0.172355 |
| IQCB1     | 3q13.33   | 0.123179127  | 0.100437 | 0.17243  |
| CXCR3     | Xq13.1    | 0.123131002  | 0.100571 | 0.172645 |
| CCT6B     | 17q12     | -0.123122633 | 0.100594 | 0.17267  |
| TMEM181   | 6q25.3    | -0.123112171 | 0.100623 | 0.172705 |
| AATK      | 17q25.3   | 0.123101709  | 0.100652 | 0.17274  |
| AGXT2     | 5p13.2    | -0.123061533 | 0.100764 | 0.172918 |
| NCAPH2    | 22q13.33  | 0.123011738  | 0.100903 | 0.173141 |
| ORM2      | 9q32      | 0.123006839  | 0.100917 | 0.17315  |
| CFAP74    | 1p36.33   | -0.122975957 | 0.101003 | 0.173277 |
| GPX7      | 1p32.3    | -0.122974076 | 0.101008 | 0.173277 |
| CLVS2     | 6q22.31   | -0.122928718 | 0.101135 | 0.17348  |
| TLNRD1    | 15q25.1   | 0.122825518  | 0.101424 | 0.17396  |
| FAM3A     | Xq28      | 0.12280878   | 0.101471 | 0.174026 |
| BOP1      | 8q24.3    | 0.122789948  | 0.101524 | 0.174102 |
| ECHDC2    | 1p32.3    | 0.122781579  | 0.101547 | 0.174127 |
| PHF5A     | 22q13.2   | 0.122766932  | 0.101588 | 0.174183 |
| DMRTA1    | 9p21.3    | 0.122706511  | 0.101758 | 0.174459 |
| SCOC      | 4q31.1    | -0.122681146 | 0.101829 | 0.174561 |
| ATPAF2    | 17p11.2   | -0.122679053 | 0.101835 | 0.174561 |
| OSM       | 22q12.2   | 0.122668592  | 0.101865 | 0.174596 |
| LOC100130 | 2q37.3    | 0.122646587  | 0.101927 | 0.174683 |



|           |          |              |          |          |
|-----------|----------|--------------|----------|----------|
| CHURC1    | 14q23.3  | -0.122643483 | 0.101935 | 0.174683 |
| APOC2     | 19q13.32 | 0.122641391  | 0.101941 | 0.174683 |
| OR3A1     | 17p13.3  | -0.12261373  | 0.102019 | 0.174801 |
| FAM90A1   | 12p13.31 | 0.122597708  | 0.102064 | 0.174863 |
| JMJD4     | 1q42.13  | 0.122536773  | 0.102236 | 0.175137 |
| PTPN20    | 10q11.22 | 0.122534789  | 0.102242 | 0.175137 |
| ZWILCH    | 15q22.31 | 0.122494926  | 0.102354 | 0.175305 |
| GMFG      | 19q13.2  | -0.122490741 | 0.102366 | 0.175305 |
| LOC646471 | 11p36.11 | -0.122490741 | 0.102366 | 0.175305 |
| DOHH      | 19p13.3  | 0.122476095  | 0.102407 | 0.175361 |
| CD6       | 11q12.2  | -0.122448894 | 0.102484 | 0.175478 |
| SEMA6C    | 1q21.3   | -0.12243634  | 0.10252  | 0.175523 |
| SRRD      | 22q12.1  | 0.122421694  | 0.102561 | 0.175579 |
| CPB2      | 13q14.13 | -0.122418352 | 0.10257  | 0.17558  |
| CIITA     | 16p13.13 | -0.122386123 | 0.102662 | 0.175706 |
| MATN3     | 2p24.1   | 0.122386123  | 0.102662 | 0.175706 |
| UFM1      | 13q13.3  | 0.122375662  | 0.102691 | 0.175742 |
| CATSPERG  | 19q13.2  | 0.122348461  | 0.102768 | 0.175859 |
| RNF175    | 4q31.3   | -0.122302429 | 0.102899 | 0.176062 |
| MYL9      | 20q11.23 | 0.122300337  | 0.102905 | 0.176062 |
| HLCS      | 21q22.13 | -0.122281506 | 0.102958 | 0.176138 |
| TATDN1    | 8q24.13  | 0.122275229  | 0.102976 | 0.176149 |
| UBASH3B   | 11q24.1  | 0.122273136  | 0.102982 | 0.176149 |
| GATB      | 4q31.3   | -0.122266859 | 0.103    | 0.176159 |
| STRN3     | 14q12    | -0.122264767 | 0.103006 | 0.176159 |
| AKT1      | 14q32.33 | 0.122241751  | 0.103071 | 0.176251 |
| WDR91     | 7q33     | -0.122239659 | 0.103077 | 0.176251 |
| CARMN     | 5q32     | 0.122199904  | 0.10319  | 0.176418 |
| PRO0628   | 20q12    | 0.122198959  | 0.103192 | 0.176418 |
| RRP1B     | 21q22.3  | -0.122189442 | 0.103219 | 0.17645  |
| CPEB2     | 4p15.32  | -0.122164334 | 0.103291 | 0.176556 |
| POTEG     | 14q11.2  | -0.122136789 | 0.103369 | 0.176675 |
| SLC36A1   | 5q33.1   | -0.122118302 | 0.103422 | 0.17675  |
| FSTL1     | 3q13.33  | -0.122093194 | 0.103493 | 0.176857 |
| CABP5     | 19q13.33 | -0.122080699 | 0.103529 | 0.176903 |
| KLHL1     | 13q21.33 | -0.122071999 | 0.103554 | 0.17693  |
| DAZ1      | Yq11.223 | -0.122059448 | 0.10359  | 0.176976 |
| EFCAB13   | 17q21.32 | 0.122030423  | 0.103672 | 0.177102 |
| AJM1      | 9q34.3   | -0.122009499 | 0.103732 | 0.177189 |
| PNPT1     | 2p16.1   | 0.122003222  | 0.10375  | 0.177205 |
| LIG1      | 19q13.33 | 0.121982299  | 0.10381  | 0.177291 |
| PRB3      | 12p13.2  | 0.121948981  | 0.103905 | 0.177439 |
| FGGY      | 1p32.1   | -0.121938359 | 0.103935 | 0.177476 |
| PLEKHA8P1 | 12q12    | 0.121927897  | 0.103965 | 0.177511 |
| CPM       | 12q15    | -0.121877681 | 0.104109 | 0.177727 |
| LRRC4B    | 19q13.33 | -0.121875588 | 0.104115 | 0.177727 |
| RPL32     | 3p25.2   | 0.121873496  | 0.104121 | 0.177727 |
| TMEM71    | 8q24.22  | -0.121871404 | 0.104127 | 0.177727 |
| TSPAN31   | 12q14.1  | 0.12185048   | 0.104186 | 0.177814 |
| OR2B3     | 6p22.1   | 0.121846667  | 0.104197 | 0.177817 |
| UMODL1-AS | 21q22.3  | -0.121823184 | 0.104265 | 0.177917 |
| TMEM115   | 3p21.31  | 0.121812818  | 0.104294 | 0.177952 |
| ZNF461    | 19q13.12 | -0.121618229 | 0.104853 | 0.17889  |
| NUBP1     | 16p13.13 | -0.121611952 | 0.104871 | 0.178906 |

|          |           |              |          |          |
|----------|-----------|--------------|----------|----------|
| TLK1     | 2q31.1    | -0.121603582 | 0.104895 | 0.178932 |
| DDX51    | 12q24.33  | -0.12159312  | 0.104925 | 0.178968 |
| ZNF598   | 16p13.3   | 0.121568012  | 0.104998 | 0.179076 |
| TSGA13   | 7q32.2    | -0.121538861 | 0.105082 | 0.179204 |
| STK19    | 6p21.33   | 0.121532442  | 0.1051   | 0.17922  |
| ANGPTL6  | 19p13.2   | -0.121528512 | 0.105112 | 0.179224 |
| OR2V2    | 5q35.3    | -0.121486752 | 0.105232 | 0.179414 |
| SPATA9   | 5q15      | -0.121458227 | 0.105314 | 0.179539 |
| MED1     | 17q12     | -0.121434101 | 0.105384 | 0.179643 |
| HLA-DMB  | 6p21.32   | -0.121417362 | 0.105432 | 0.17971  |
| TSEN15   | 1q25.3    | 0.121392254  | 0.105505 | 0.179818 |
| CMIP     | 16q23.2-c | -0.121383885 | 0.105529 | 0.179844 |
| ABCC13   | 21q11.2   | 0.121354112  | 0.105615 | 0.179976 |
| ERC2-IT1 | 3p14.3    | -0.121344321 | 0.105644 | 0.180009 |
| SOX4     | 6p22.3    | 0.121339945  | 0.105656 | 0.180015 |
| CNGA2    | Xq28      | -0.121307765 | 0.10575  | 0.180158 |
| CHIC2    | 4q12      | 0.121287636  | 0.105808 | 0.180242 |
| ZNF560   | 19p13.2   | -0.121277729 | 0.105837 | 0.180258 |
| KC6      | -         | -0.121277439 | 0.105837 | 0.180258 |
| RNF222   | 17p13.1   | -0.121275213 | 0.105844 | 0.180258 |
| PABPC4   | 1p34.3    | -0.121233235 | 0.105966 | 0.18045  |
| GGT6     | 17p13.2   | 0.121216623  | 0.106014 | 0.180516 |
| PPP1R3A  | 7q31.1    | -0.121209044 | 0.106036 | 0.180538 |
| R3HCC1L  | 10q24.2   | 0.121197665  | 0.106069 | 0.180579 |
| MRAS     | 3q22.3    | -0.12119348  | 0.106081 | 0.180584 |
| WT1      | 11p13     | -0.121174806 | 0.106135 | 0.180661 |
| HNRNPH1  | 5q35.3    | -0.121160003 | 0.106178 | 0.180719 |
| STX6     | 1q25.3    | 0.12113071   | 0.106264 | 0.180849 |
| SLC25A12 | 2q31.1    | -0.121111878 | 0.106318 | 0.180927 |
| PSMB11   | 14q11.2   | -0.121057386 | 0.106477 | 0.181181 |
| KCNV2    | 9p24.2    | -0.121028291 | 0.106562 | 0.18131  |
| CETN3    | 5q14.3    | -0.121019815 | 0.106586 | 0.181337 |
| AKR1A1   | 1p34.1    | 0.120998891  | 0.106647 | 0.181425 |
| VPS4B    | 18q21.33  | -0.120975875 | 0.106715 | 0.181524 |
| LIPT1    | 2q11.2    | -0.120963321 | 0.106751 | 0.181565 |
| DNAJC7   | 17q21.2   | 0.120961229  | 0.106757 | 0.181565 |
| COLQ     | 3p25.1    | -0.120896366 | 0.106947 | 0.181857 |
| ZBTB37   | 1q25.1    | -0.120896366 | 0.106947 | 0.181857 |
| MAP3K2   | 2q14.3    | -0.120867073 | 0.107032 | 0.181987 |
| PZP      | 12p13.31  | -0.120861063 | 0.10705  | 0.182001 |
| IL17RC   | 3p25.3 3f | 0.120856611  | 0.107063 | 0.182008 |
| SPNS3    | 17p13.2   | 0.12083575   | 0.107124 | 0.182096 |
| SPPL2B   | 19p13.3   | 0.120821041  | 0.107167 | 0.182154 |
| NUFIP2   | 17q11.2   | 0.120808487  | 0.107204 | 0.182191 |
| MED6     | 14q24.2   | 0.120806394  | 0.10721  | 0.182191 |
| BTBD11   | 12q23.3   | -0.120804302 | 0.107216 | 0.182191 |
| PSMC5    | 17q23.3   | 0.120781286  | 0.107283 | 0.18229  |
| HIST1H3J | 6p22.1    | 0.120693512  | 0.107541 | 0.182712 |
| HAUS5    | 19q13.12  | 0.120676668  | 0.10759  | 0.18278  |
| FEZ1     | 11q24.2   | -0.120672483 | 0.107603 | 0.182786 |
| CHD1     | 5q15-q21. | -0.12064319  | 0.107689 | 0.182916 |
| CR2      | 1q32.2    | -0.120613099 | 0.107777 | 0.183051 |
| JMJD1C   | 10q21.3   | -0.120561589 | 0.107929 | 0.183293 |
| PABPC1   | 8q22.3    | 0.120546942  | 0.107972 | 0.18335  |

|           |           |               |           |           |
|-----------|-----------|---------------|-----------|-----------|
| NDUFA2    | 5q31. 3   | 0. 120540665  | 0. 10799  | 0. 183366 |
| LGI1      | 10q23. 33 | -0. 120520618 | 0. 108049 | 0. 183451 |
| L3MBTL4   | 18p11. 31 | -0. 120496725 | 0. 10812  | 0. 183549 |
| HOXB13    | 17q21. 32 | 0. 120494714  | 0. 108126 | 0. 183549 |
| OTOAP1    | 16p12. 2  | 0. 120471932  | 0. 108193 | 0. 183648 |
| LOC100132 | 1p36. 33  | 0. 120463248  | 0. 108219 | 0. 183676 |
| PFKFB4    | 3p21. 31  | -0. 120456971 | 0. 108237 | 0. 183691 |
| GDF15     | 19p13. 11 | 0. 120450694  | 0. 108256 | 0. 183702 |
| CEP70     | 3q22. 3   | 0. 120448601  | 0. 108262 | 0. 183702 |
| GNRHR2    | 1q21. 1   | 0. 120442324  | 0. 10828  | 0. 183718 |
| KIR2DL4   | 19q13. 42 | -0. 120432625 | 0. 108309 | 0. 183751 |
| HSPB9     | 17q21. 2  | 0. 120427678  | 0. 108324 | 0. 18376  |
| VIP       | 6q25. 2   | -0. 12041956  | 0. 108347 | 0. 183781 |
| TSEN2     | 3p25. 2   | 0. 120417216  | 0. 108354 | 0. 183781 |
| OTOL1     | 3q26. 1   | -0. 120409353 | 0. 108378 | 0. 183805 |
| FOXK2     | 17q25. 3  | -0. 120379553 | 0. 108466 | 0. 183939 |
| ASIC3     | 7q36. 1   | 0. 120366999  | 0. 108503 | 0. 183986 |
| ASGR1     | 17p13. 1  | -0. 120354445 | 0. 10854  | 0. 184033 |
| POGK      | 1q24. 1   | 0. 120348168  | 0. 108558 | 0. 184049 |
| LRRC18    | 10q11. 23 | -0. 120332056 | 0. 108606 | 0. 184103 |
| FRMPD4    | Xp22. 2   | -0. 120331334 | 0. 108608 | 0. 184103 |
| NOS2      | 17q11. 2  | -0. 120325152 | 0. 108627 | 0. 184118 |
| POLR2D    | 2q14. 3   | 0. 120304229  | 0. 108688 | 0. 184207 |
| NDP       | Xp11. 3   | 0. 120278137  | 0. 108766 | 0. 184323 |
| C10RF189  | 1q21. 3   | -0. 120257422 | 0. 108827 | 0. 184411 |
| SNORA11   | Xp11. 21  | -0. 120247317 | 0. 108857 | 0. 184439 |
| AGAP1     | 2q37. 2   | -0. 120245643 | 0. 108862 | 0. 184439 |
| YJEFN3    | 19p13. 11 | 0. 120240475  | 0. 108877 | 0. 184449 |
| ZNF300P1  | 5q33. 1   | -0. 120235181 | 0. 108893 | 0. 18446  |
| VPS33B    | 15q26. 1  | 0. 120170318  | 0. 109085 | 0. 18477  |
| TERF2     | 16q22. 1  | -0. 120161948 | 0. 10911  | 0. 184797 |
| C6ORF136  | 6p21. 33  | 0. 120155671  | 0. 109129 | 0. 184813 |
| SAR1B     | 5q31. 1   | -0. 12010127  | 0. 109291 | 0. 185071 |
| RASAL3    | 19p13. 12 | -0. 120080346 | 0. 109353 | 0. 18516  |
| COPS9     | 2q37. 3   | 0. 120057331  | 0. 109421 | 0. 185261 |
| SLC39A9   | 14q24. 1  | -0. 120053146 | 0. 109434 | 0. 185266 |
| RTCA      | 1p21. 2   | 0. 120048961  | 0. 109446 | 0. 185271 |
| PDCD1     | 2q37. 3   | -0. 12003013  | 0. 109502 | 0. 185351 |
| RPUSD1    | 16p13. 3  | 0. 120017576  | 0. 10954  | 0. 185398 |
| SLC22A9   | 11q12. 3  | -0. 119983336 | 0. 109642 | 0. 185555 |
| SNORA27   | 13q12. 2  | 0. 119969578  | 0. 109683 | 0. 185609 |
| MAPK12    | 22q13. 33 | -0. 119965267 | 0. 109695 | 0. 185615 |
| DOLPP1    | 9q34. 11  | 0. 119954805  | 0. 109727 | 0. 185652 |
| TSP02     | 6p21. 1   | 0. 119904743  | 0. 109876 | 0. 185889 |
| MAPK7     | 17p11. 2  | 0. 119883665  | 0. 109939 | 0. 18598  |
| TRIM56    | 7q22. 1   | -0. 119848095 | 0. 110045 | 0. 186144 |
| OTOP3     | 17q25. 1  | -0. 11983211  | 0. 110093 | 0. 186192 |
| ZBTB38    | 3q23      | -0. 119831356 | 0. 110095 | 0. 186192 |
| ATRAID    | 2p23. 3   | 0. 119829264  | 0. 110102 | 0. 186192 |
| WASH8P    | 12p13. 33 | 0. 119810432  | 0. 110158 | 0. 186271 |
| C5ORF52   | 5q33. 3   | -0. 119795541 | 0. 110202 | 0. 186331 |
| PTPN1     | 20q13. 13 | -0. 119791601 | 0. 110214 | 0. 186335 |
| LUC7L2    | 7q34      | -0. 119781139 | 0. 110246 | 0. 186372 |
| GBF1      | 10q24. 32 | -0. 119735108 | 0. 110383 | 0. 186589 |

|           |            |               |           |           |
|-----------|------------|---------------|-----------|-----------|
| ZNF816    | 19q13. 41  | 0. 119695353  | 0. 110503 | 0. 186775 |
| TAS2R31   | 12p13. 2   | -0. 119666694 | 0. 110588 | 0. 186904 |
| NUPR1     | 16p11. 2   | 0. 119634675  | 0. 110685 | 0. 187051 |
| GGCT      | 7p14. 3    | 0. 11963049   | 0. 110697 | 0. 187056 |
| DUPD1     | 10q22. 2   | -0. 119618817 | 0. 110732 | 0. 1871   |
| RIC8A     | 11p15. 5   | 0. 119601197  | 0. 110785 | 0. 187174 |
| RELT      | 11q13. 4   | 0. 11955935   | 0. 110911 | 0. 18737  |
| ORC1      | 1p32. 3    | 0. 119542611  | 0. 110961 | 0. 187439 |
| NHLH1     | 1q23. 2    | 0. 119511288  | 0. 111056 | 0. 187583 |
| NAA10     | Xq28       | 0. 119507041  | 0. 111068 | 0. 187583 |
| XKR6      | 8p23. 1    | 0. 119505011  | 0. 111074 | 0. 187583 |
| CBS       | 21q22. 3   | -0. 119465194 | 0. 111194 | 0. 18777  |
| FEV       | 2q35       | -0. 119428781 | 0. 111304 | 0. 187939 |
| RPS6KL1   | 14q24. 3   | 0. 119421254  | 0. 111327 | 0. 187962 |
| TMEM178A  | 2p22. 1    | 0. 119412885  | 0. 111352 | 0. 187988 |
| TNN       | 1q25. 1    | -0. 119402423 | 0. 111384 | 0. 188026 |
| ETS2      | 21q22. 2   | 0. 119398238  | 0. 111396 | 0. 188031 |
| EDN3      | 20q13. 32  | -0. 119387776 | 0. 111428 | 0. 188069 |
| PLAC9P1   | 2q21. 1    | -0. 119382024 | 0. 111445 | 0. 188082 |
| SOX3      | Xq27. 1    | -0. 119376063 | 0. 111463 | 0. 188097 |
| CBWD2     | 2q14. 1    | 0. 119371038  | 0. 111478 | 0. 188106 |
| HOMEZ     | 14q11. 2   | 0. 119362668  | 0. 111504 | 0. 188123 |
| SLC22A2   | 6q25. 3    | -0. 119361601 | 0. 111507 | 0. 188123 |
| C10RF162  | 1p13. 2    | -0. 119350114 | 0. 111542 | 0. 188149 |
| UBE2F     | 2q37. 3    | -0. 119350114 | 0. 111542 | 0. 188149 |
| ZC2HC1B   | 6q24. 2    | -0. 119305096 | 0. 111678 | 0. 188363 |
| NEU4      | 2q37. 3    | -0. 119214734 | 0. 111951 | 0. 188808 |
| COL28A1   | 7p21. 3    | -0. 119191157 | 0. 112023 | 0. 188902 |
| TRIL      | 7p14. 3    | -0. 119190111 | 0. 112026 | 0. 188902 |
| C22ORF23  | 22q13. 1   | -0. 11918691  | 0. 112035 | 0. 188903 |
| FCGR2A    | 1q23. 3    | -0. 119178541 | 0. 112061 | 0. 18893  |
| PIGO      | 9p13. 3    | -0. 119168079 | 0. 112093 | 0. 188967 |
| GTF2IRD1F | 7q11. 21   | 0. 119161527  | 0. 112112 | 0. 188985 |
| C1QTNF7   | 4p15. 32   | -0. 11915134  | 0. 112143 | 0. 189021 |
| LINC01257 | 12q24. 33  | -0. 119120232 | 0. 112238 | 0. 189164 |
| ACP5      | 19p13. 2   | 0. 119107401  | 0. 112277 | 0. 189198 |
| UCKL1     | 20q13. 33  | 0. 119107401  | 0. 112277 | 0. 189198 |
| CHRM1     | 11q12. 3   | -0. 118996993 | 0. 112612 | 0. 189736 |
| 1-Dec     | 9q33. 1    | -0. 118995999 | 0. 112615 | 0. 189736 |
| CTU2      | 16q24. 3   | 0. 118992321  | 0. 112627 | 0. 189739 |
| MAP3K8    | 10p11. 23  | -0. 118988136 | 0. 112639 | 0. 189745 |
| C1QTNF8   | 16p13. 3   | -0. 118976667 | 0. 112674 | 0. 189777 |
| MTCP1     | Xq28       | 0. 118975582  | 0. 112677 | 0. 189777 |
| DEFB107A  | 8p23. 1    | -0. 118945556 | 0. 112769 | 0. 189899 |
| SSX7      | Xp11. 22   | -0. 118945556 | 0. 112769 | 0. 189899 |
| DCBLD1    | 6q22. 1    | 0. 118925366  | 0. 11283  | 0. 189981 |
| HPN-AS1   | 19q13. 11- | -0. 118923297 | 0. 112837 | 0. 189981 |
| GPS2      | 17p13. 1   | -0. 118887703 | 0. 112945 | 0. 190148 |
| BAZ2A     | 12q13. 3   | -0. 11886678  | 0. 113009 | 0. 19024  |
| RGS6      | 14q24. 2   | 0. 11885694   | 0. 113039 | 0. 190274 |
| CYREN     | 7q33       | -0. 118814471 | 0. 113169 | 0. 190466 |
| CHRNA2    | 8p21. 2    | -0. 118813385 | 0. 113172 | 0. 190466 |
| KRT33A    | 17q21. 2   | -0. 11880704  | 0. 113192 | 0. 190482 |
| C4ORF36   | 4q21. 3    | 0. 11874709   | 0. 113375 | 0. 190775 |

|           |          |              |          |          |
|-----------|----------|--------------|----------|----------|
| FASTKD1   | 2q31.1   | -0.118743331 | 0.113386 | 0.190775 |
| STAP1     | 4q13.2   | -0.118740875 | 0.113394 | 0.190775 |
| C14ORF39  | 14q23.1  | -0.118715765 | 0.113471 | 0.190888 |
| ARGFX     | 3q13.33  | 0.11870723   | 0.113497 | 0.190916 |
| PRPF19    | 11q12.2  | 0.118686837  | 0.113559 | 0.191005 |
| MB        | 22q12.3  | 0.118663883  | 0.11363  | 0.191107 |
| NXN       | 17p13.3  | -0.118655452 | 0.113656 | 0.191134 |
| NPFF      | 12q13.13 | 0.118642897  | 0.113694 | 0.191183 |
| CHKB-DT   | 22q13.33 | -0.118622036 | 0.113758 | 0.191259 |
| FASTK     | 7q36.1   | 0.118621974  | 0.113758 | 0.191259 |
| TMEM174   | 5q13.2   | 0.118598809  | 0.113829 | 0.191362 |
| ASTE1     | 3q22.1   | -0.118594773 | 0.113842 | 0.191367 |
| TRAPPC3   | 1p34.3   | 0.118580127  | 0.113887 | 0.191426 |
| CEP95     | 17q23.3  | 0.11856548   | 0.113932 | 0.191486 |
| NPHP3-AS1 | 3q22.1   | -0.118562101 | 0.113942 | 0.191487 |
| IP6K3     | 6p21.31  | -0.118547667 | 0.113986 | 0.191546 |
| PGLYRP1   | 19q13.32 | -0.118476499 | 0.114205 | 0.191897 |
| POP4      | 19q12    | 0.118452493  | 0.114279 | 0.192005 |
| ETV3      | 1q23.1   | -0.118429477 | 0.11435  | 0.192108 |
| RBPMS2    | 15q22.31 | -0.118412738 | 0.114401 | 0.192162 |
| BLOC1S1   | 12q13.2  | 0.118410646  | 0.114408 | 0.192162 |
| KLK3      | 19q13.33 | 0.118409788  | 0.114411 | 0.192162 |
| MCHR2     | 6q16.2   | -0.118362965 | 0.114555 | 0.192388 |
| COX6A1    | 12q24.31 | 0.118358337  | 0.114569 | 0.192396 |
| CCDC74B   | 2q21.1   | 0.11834369   | 0.114614 | 0.192455 |
| EIF2B4    | 2p23.3   | 0.118337413  | 0.114634 | 0.192466 |
| INTS4P2   | 7q11.21  | 0.118335383  | 0.11464  | 0.192466 |
| SRGAP2    | 1q32.1   | 0.118318644  | 0.114692 | 0.192537 |
| CHMP3     | 2p11.2   | 0.118310213  | 0.114718 | 0.192564 |
| HEPN1     | 11q24.2  | -0.118235626 | 0.114948 | 0.192935 |
| MSANTD2   | 11q24.2  | 0.118222334  | 0.114989 | 0.192988 |
| JUND      | 19p13.11 | 0.11820141   | 0.115054 | 0.19308  |
| OSGEPL1   | 2q32.2   | -0.118188856 | 0.115093 | 0.193129 |
| TRIM2     | 4q31.3   | -0.118178394 | 0.115125 | 0.193167 |
| VNN3      | 6q23.2   | -0.118162892 | 0.115173 | 0.193232 |
| CEACAM20  | 19q13.31 | 0.118152972  | 0.115204 | 0.193244 |
| CNNM2     | 10q24.32 | -0.118151194 | 0.11521  | 0.193244 |
| PROB1     | 5q31.2   | 0.118151194  | 0.11521  | 0.193244 |
| GPR45     | 2q12.1   | -0.118145844 | 0.115226 | 0.193255 |
| PMS2P3    | 7q11.23  | 0.118111501  | 0.115333 | 0.193418 |
| USP3      | 15q22.31 | 0.118092608  | 0.115391 | 0.1935   |
| LRRC29    | 16q22.1  | 0.118071684  | 0.115456 | 0.193592 |
| RAF1      | 3p25.2   | 0.118067499  | 0.115469 | 0.193598 |
| RP2       | Xp11.3   | -0.118042391 | 0.115547 | 0.193712 |
| KLHDC7A   | 1p36.13  | 0.118025652  | 0.115599 | 0.193783 |
| DKK2      | 4q25     | -0.117996359 | 0.11569  | 0.193919 |
| CCDC196   | 14q23.3  | -0.11796866  | 0.115776 | 0.194048 |
| SNORA53   | 12q23.1  | -0.117937426 | 0.115873 | 0.194194 |
| SULT1A1   | 16p11.2  | 0.117929404  | 0.115898 | 0.19422  |
| PTCHD1    | Xp22.11  | -0.11792119  | 0.115924 | 0.194246 |
| DCN       | 12q21.33 | -0.117898019 | 0.115996 | 0.194351 |
| DIPK2A    | 3q24     | -0.117891741 | 0.116016 | 0.194367 |
| CNGB3     | 8q21.3   | -0.117883605 | 0.116041 | 0.194394 |
| CTRL      | 16q22.1  | -0.117839433 | 0.116179 | 0.194608 |

|           |           |              |          |          |
|-----------|-----------|--------------|----------|----------|
| JMJD8     | 16p13.3   | 0.117822694  | 0.116231 | 0.194679 |
| DGKH      | 13q14.11  | 0.11781014   | 0.11627  | 0.194728 |
| STAT1     | 2q32.2    | 0.117799678  | 0.116303 | 0.194767 |
| VAR52     | 6p21.33   | 0.117780847  | 0.116361 | 0.194849 |
| RFTN1     | 3p24.3    | -0.117774569 | 0.116381 | 0.19486  |
| NDUFA12   | 12q22     | 0.117772477  | 0.116388 | 0.19486  |
| SLC38A8   | 16q23.3   | -0.117751204 | 0.116454 | 0.194948 |
| NPIPA1    | 16p13.11  | -0.117749461 | 0.116459 | 0.194948 |
| PPP2R5B   | 11q13.1   | 0.11773063   | 0.116518 | 0.19503  |
| TBCB      | 19q13.12  | 0.117718076  | 0.116557 | 0.195079 |
| HIST1H2BF | 6p22.2    | 0.117692201  | 0.116638 | 0.195198 |
| C10RF131  | 1q42.2    | 0.117678321  | 0.116682 | 0.195254 |
| HMGB2     | 4q34.1    | 0.117636474  | 0.116813 | 0.195436 |
| CYP2B7P   | 19q13.2   | 0.117634382  | 0.116819 | 0.195436 |
| UQCRB     | 8q22.1    | -0.117634382 | 0.116819 | 0.195436 |
| CSAG3     | Xq28      | 0.117536795  | 0.117125 | 0.195931 |
| PEF1      | 1p35.2    | 0.117521394  | 0.117174 | 0.19599  |
| COX7C     | 5q14.3    | 0.117519302  | 0.11718  | 0.19599  |
| CALHM5    | 6q22.1    | -0.117510933 | 0.117206 | 0.196018 |
| CD109     | 6q13      | 0.117504655  | 0.117226 | 0.196034 |
| OR51F1    | 11p15.4   | -0.117495    | 0.117257 | 0.196052 |
| CXORF66   | Xq27.1    | 0.117495     | 0.117257 | 0.196052 |
| TPD52     | 8q21.13   | -0.117456531 | 0.117377 | 0.196238 |
| RDH12     | 14q24.1   | -0.117450254 | 0.117397 | 0.196254 |
| ZNF362    | 1p35.1    | -0.117441885 | 0.117423 | 0.196282 |
| TMIGD1    | 17q11.2   | -0.117411571 | 0.117519 | 0.196425 |
| MYOZ2     | 4q26      | -0.117370643 | 0.117648 | 0.196617 |
| CACNA1S   | 1q32.1    | -0.117368818 | 0.117653 | 0.196617 |
| TRIM68    | 11p15.4   | -0.117364468 | 0.117667 | 0.196623 |
| C17ORF77  | 17q25.1   | 0.117350124  | 0.117712 | 0.196682 |
| C16ORF92  | 16p11.2   | -0.11734401  | 0.117732 | 0.196698 |
| EMB       | 5q11.1    | 0.117326805  | 0.117786 | 0.196772 |
| SLC22A7   | 6p21.1    | -0.117299771 | 0.117871 | 0.196898 |
| SPATA5L1  | 15q21.1   | 0.117289143  | 0.117904 | 0.196938 |
| ZNF561    | 19p13.2   | -0.117276589 | 0.117944 | 0.196987 |
| POTEF     | 2q21.1    | -0.117262065 | 0.11799  | 0.197048 |
| REXO5     | 16p12.3   | -0.117257757 | 0.118004 | 0.197054 |
| DCAF8     | 1q23.2    | -0.117238926 | 0.118063 | 0.197137 |
| MMP17     | 12q24.33  | 0.117209633  | 0.118155 | 0.197275 |
| GPRC6A    | 6q22.1    | -0.117180729 | 0.118247 | 0.197411 |
| CTH       | 1p31.1    | -0.117165694 | 0.118294 | 0.197473 |
| ANO10     | 3p22.1-p2 | 0.117151047  | 0.118341 | 0.197534 |
| AGAP11    | 10q23.2   | 0.11714797   | 0.11835  | 0.197534 |
| WBP1      | 2p13.1    | 0.11714477   | 0.118361 | 0.197534 |
| IRX2      | 5p15.33   | -0.117081999 | 0.118559 | 0.19785  |
| LARS2     | 3p21.31   | -0.117012952 | 0.118778 | 0.198198 |
| ZNF775    | 7q36.1    | -0.117000398 | 0.118818 | 0.198248 |
| SPHK1     | 17q25.1   | 0.116935534  | 0.119024 | 0.198575 |
| POGLUT3   | 11q22.3   | -0.116910426 | 0.119104 | 0.198692 |
| LRRC25    | 19p13.11  | -0.116891595 | 0.119164 | 0.198775 |
| DNAJB14   | 4q23      | -0.116872764 | 0.119224 | 0.198842 |
| GPD1      | 12q13.12  | -0.116872764 | 0.119224 | 0.198842 |
| NYNRIN    | 14q12     | 0.11685184   | 0.11929  | 0.198936 |
| ZBTB18    | 1q44      | -0.116847656 | 0.119304 | 0.198942 |

|           |          |              |          |          |
|-----------|----------|--------------|----------|----------|
| RPS11     | 19q13.33 | 0.116835101  | 0.119343 | 0.198992 |
| CLIP4     | 2p23.2   | -0.116826732 | 0.11937  | 0.19902  |
| IQCJ      | 3q25.32  | 0.116807441  | 0.119432 | 0.199106 |
| PIK3R4    | 3q22.1   | -0.116797439 | 0.119463 | 0.199142 |
| RHBDD2    | 7q11.23  | 0.116791162  | 0.119483 | 0.199159 |
| SEBOX     | 17q11.2  | -0.116784612 | 0.119504 | 0.19917  |
| POLRMT    | 19p13.3  | 0.116782792  | 0.11951  | 0.19917  |
| HAO2      | 1p12     | -0.116772225 | 0.119544 | 0.19921  |
| ATP5MD    | 10q24.33 | 0.116751407  | 0.11961  | 0.199298 |
| BRWD3     | Xq21.1   | -0.116749315 | 0.119617 | 0.199298 |
| LINC01001 | 11p15.5  | 0.116738853  | 0.11965  | 0.199337 |
| SFT2D3    | 2q14.3   | 0.116722114  | 0.119704 | 0.19941  |
| KLHL25    | 15q25.3  | 0.116711652  | 0.119737 | 0.199449 |
| CLEC6A    | 12p13.31 | -0.116704999 | 0.119758 | 0.199467 |
| MRGPRX4   | 11p15.1  | -0.116686962 | 0.119816 | 0.199532 |
| OLR1      | 12p13.2  | 0.116686544  | 0.119817 | 0.199532 |
| LAS1L     | Xq12     | 0.116650974  | 0.119931 | 0.199705 |
| ZNRF2     | 7p14.3   | -0.116642605 | 0.119958 | 0.199733 |
| FAAP100   | 17q25.3  | 0.116579834  | 0.120158 | 0.20004  |
| LECT2     | 5q31.1   | 0.116578394  | 0.120163 | 0.20004  |
| SPN       | 16p11.2  | -0.116575649 | 0.120172 | 0.20004  |
| LIX1L     | 1q21.1   | -0.116508694 | 0.120386 | 0.20038  |
| LAMTOR4   | 7q22.1   | 0.116500324  | 0.120413 | 0.200408 |
| HAVCR1    | 5q33.3   | 0.116473317  | 0.1205   | 0.200535 |
| SPIC      | 12q23.2  | -0.116454593 | 0.12056  | 0.200619 |
| KIAA0319L | 1p34.3   | -0.116450108 | 0.120574 | 0.200626 |
| NPAS4     | 11q13.2  | -0.116441661 | 0.120601 | 0.200654 |
| RAD18     | 3p25.3   | 0.116429184  | 0.120641 | 0.200704 |
| ATXN7L1   | 7q22.3   | -0.116393614 | 0.120756 | 0.200868 |
| SNORA41   | 2q33.3   | 0.116392339  | 0.12076  | 0.200868 |
| ASB6      | 9q34.11  | 0.11626598   | 0.121166 | 0.201527 |
| LCN15     | 9q34.3   | -0.116255491 | 0.1212   | 0.201554 |
| CHRNA9    | 4p14     | -0.116254806 | 0.121202 | 0.201554 |
| HRCT1     | 9p13.3   | 0.11623878   | 0.121254 | 0.201623 |
| FAM241B   | 10q22.1  | 0.116226226  | 0.121295 | 0.201659 |
| BHMT      | 5q14.1   | -0.116225734 | 0.121296 | 0.201659 |
| GPR151    | 5q32     | -0.116198177 | 0.121385 | 0.20179  |
| TEX47     | 7q21.13  | 0.11618873   | 0.121416 | 0.201824 |
| CD4       | 12p13.31 | -0.116173917 | 0.121463 | 0.201887 |
| ARHGAP29  | 1p22.1   | -0.116127885 | 0.121612 | 0.2021   |
| PEX11A    | 15q26.1  | 0.116127885  | 0.121612 | 0.2021   |
| PAK1IP1   | 6p24.2   | -0.116102777 | 0.121693 | 0.202218 |
| C3ORF79   | 3q25.2   | -0.11609673  | 0.121713 | 0.202234 |
| NPHP4     | 1p36.31  | -0.116079761 | 0.121768 | 0.202308 |
| RXRG      | 1q23.3   | -0.116069926 | 0.121799 | 0.202344 |
| FCRL2     | 1q23.1   | -0.116054208 | 0.12185  | 0.202412 |
| DPPA5     | 6q13     | 0.116048666  | 0.121868 | 0.202425 |
| CDHR3     | 7q22.3   | -0.116044191 | 0.121883 | 0.202432 |
| ZNF547    | 19q13.43 | -0.116023267 | 0.12195  | 0.202528 |
| MORN3     | 12q24.31 | -0.116014898 | 0.121978 | 0.202539 |
| PBXIP1    | 1q21.3   | -0.116012805 | 0.121984 | 0.202539 |
| TSPAN10   | 17q25.3  | 0.11601182   | 0.121988 | 0.202539 |
| PCDH7     | 4p15.1   | 0.115952127  | 0.122181 | 0.202843 |
| ZNF883    | 9q32     | -0.115853786 | 0.1225   | 0.203356 |

|            |           |              |          |          |
|------------|-----------|--------------|----------|----------|
| FKBP1A     | 20p13     | 0.115784738  | 0.122725 | 0.203712 |
| DYNC1LI1   | 3p22.3    | -0.115763815 | 0.122793 | 0.203786 |
| RTN4IP1    | 6q21      | -0.115763815 | 0.122793 | 0.203786 |
| SS18L2     | 3p22.1    | 0.115761722  | 0.1228   | 0.203786 |
| DPEP3      | 16q22.1   | -0.115755176 | 0.122821 | 0.203804 |
| CHMP6      | 17q25.3   | 0.115747076  | 0.122847 | 0.203831 |
| ADCY4      | 14q12     | -0.115707321 | 0.122977 | 0.204029 |
| KLHL35     | 11q13.4   | 0.115648796  | 0.123168 | 0.204329 |
| ARL6IP5    | 3p14.1    | 0.11564455   | 0.123182 | 0.204335 |
| LRRC20     | 10q22.1   | 0.115627812  | 0.123236 | 0.204403 |
| ARHGAP9    | 12q13.3   | -0.115625719 | 0.123243 | 0.204403 |
| PSMG1      | 21q22.2   | 0.115621535  | 0.123257 | 0.204409 |
| KNL1       | 15q15.1   | 0.115606888  | 0.123305 | 0.204465 |
| WTIP       | 19q13.11  | 0.115604796  | 0.123311 | 0.204465 |
| NPTX2      | 7q22.1    | -0.115571318 | 0.123421 | 0.204618 |
| FMO1       | 1q24.3    | -0.115570332 | 0.123424 | 0.204618 |
| GABRR2     | 6q15      | -0.115507836 | 0.123628 | 0.20494  |
| GAPT       | 5q11.2    | -0.115504363 | 0.12364  | 0.204942 |
| GALK2      | 15q21.1-c | 0.115489716  | 0.123688 | 0.205004 |
| ZBTB17     | 1p36.13   | 0.115426945  | 0.123893 | 0.205328 |
| AHSA1      | 14q24.3   | 0.115418576  | 0.123921 | 0.205356 |
| ORAI1      | 12q24.31  | 0.115412299  | 0.123941 | 0.205373 |
| COPE       | 19p13.11  | 0.115366267  | 0.124092 | 0.205607 |
| CFAP43     | 10q25.1   | -0.11535999  | 0.124113 | 0.205624 |
| LRRC52-AS1 | 1q23.3-q2 | -0.115330074 | 0.124211 | 0.205755 |
| PMCHL1     | 5p14.3    | -0.115329641 | 0.124213 | 0.205755 |
| OCLNP1     | 5q13.2    | 0.115325293  | 0.124227 | 0.205761 |
| HOTAIR     | 12q13.13  | 0.115314734  | 0.124262 | 0.205802 |
| LINC0093C  | 15q26.1   | -0.115286592 | 0.124354 | 0.205938 |
| NANOS2     | 19q13.32  | -0.115277091 | 0.124385 | 0.20596  |
| AKAP13     | 15q25.3   | -0.115276296 | 0.124388 | 0.20596  |
| KMT5A      | 12q24.31  | 0.115270019  | 0.124409 | 0.205977 |
| SPATA31C1  | 19q22.1   | 0.115241353  | 0.124503 | 0.206116 |
| SERINC5    | 5q14.1    | -0.115228171 | 0.124546 | 0.206171 |
| ST20-AS1   | 15q25.1   | -0.115212539 | 0.124598 | 0.206228 |
| USP32P2    | 17p11.2   | -0.115211433 | 0.124601 | 0.206228 |
| PPP5C      | 19q13.32  | 0.115205156  | 0.124622 | 0.206245 |
| SRP14      | 15q15.1   | 0.115161216  | 0.124767 | 0.206467 |
| PGS1       | 17q25.3   | -0.115148662 | 0.124808 | 0.206519 |
| C4A        | 6p21.33   | -0.115113092 | 0.124925 | 0.206679 |
| MSRB3      | 12q14.3   | -0.115113092 | 0.124925 | 0.206679 |
| EMBP1      | 1p11.2    | 0.115108907  | 0.124939 | 0.206684 |
| LEO1       | 15q21.2   | -0.115092168 | 0.124994 | 0.206759 |
| FLRT1      | 11q13.1   | -0.115069152 | 0.12507  | 0.206867 |
| SPAG8      | 9p13.3    | -0.115010566 | 0.125264 | 0.20717  |
| LINC00937  | 12p13.31  | -0.11499598  | 0.125312 | 0.207233 |
| IVD        | 15q15.1   | 0.11498755   | 0.12534  | 0.207262 |
| CTPS1      | 1p34.2    | -0.114981273 | 0.125361 | 0.207273 |
| EVA1A      | 2p12      | -0.114979181 | 0.125368 | 0.207273 |
| HOXD10     | 2q31.1    | 0.11494727   | 0.125473 | 0.207431 |
| ZCCHC24    | 10q22.3   | -0.114931057 | 0.125527 | 0.207497 |
| RBBP8      | 18q11.2   | 0.114928964  | 0.125534 | 0.207497 |
| YES1       | 18p11.32  | 0.114899672  | 0.125631 | 0.20764  |
| CDKN2AIP   | 4q35.1    | -0.114891302 | 0.125659 | 0.207668 |



|           |          |              |          |          |
|-----------|----------|--------------|----------|----------|
| DBP       | 19q13.33 | 0.114885025  | 0.12568  | 0.207686 |
| MED18     | 1p35.3   | 0.114876656  | 0.125707 | 0.207714 |
| RNF6      | 13q12.13 | -0.114824347 | 0.125881 | 0.207978 |
| CYB5A     | 18q22.3  | -0.114822254 | 0.125888 | 0.207978 |
| EDIL3     | 5q14.3   | -0.114815977 | 0.125909 | 0.207995 |
| MRPS14    | 1q25.1   | 0.114795054  | 0.125978 | 0.208093 |
| PLEKHF1   | 19q12    | 0.114730191  | 0.126194 | 0.208432 |
| PCDHGB7   | 5q31.3   | -0.114726006 | 0.126208 | 0.208437 |
| KCNK17    | 6p21.2   | -0.114721821 | 0.126221 | 0.208443 |
| UST       | 6q25.1   | 0.11470299   | 0.126284 | 0.208529 |
| PRAMEF1   | 1p36.21  | -0.114671959 | 0.126387 | 0.208683 |
| PRAMEF8   | 1p36.21  | -0.114661649 | 0.126422 | 0.208722 |
| LINC01089 | 12q24.31 | -0.114638127 | 0.1265   | 0.208834 |
| HOPX      | 4q12     | 0.11463185   | 0.126521 | 0.208851 |
| TAC1      | 7q21.3   | -0.11462777  | 0.126534 | 0.208857 |
| LGALS12   | 11q12.3  | -0.114621866 | 0.126554 | 0.208872 |
| SEMA6B    | 19p13.3  | -0.114602557 | 0.126619 | 0.208961 |
| ARHGEF12  | 11q23.3  | -0.114579541 | 0.126695 | 0.20907  |
| TRPV1     | 17p13.2  | -0.114562802 | 0.126751 | 0.209145 |
| SLC7A6    | 16q22.1  | -0.114533509 | 0.126849 | 0.209272 |
| SWT1      | 1q25.3   | -0.114533509 | 0.126849 | 0.209272 |
| ERAP1     | 5q15     | -0.114512586 | 0.126919 | 0.20937  |
| RTN4RL2   | 11q12.1  | -0.114495847 | 0.126975 | 0.209445 |
| AGA       | 4q34.3   | -0.11448957  | 0.126996 | 0.209462 |
| RETREG3   | 17q21.2  | 0.114483293  | 0.127017 | 0.209479 |
| HMGB4     | 1p35.1   | -0.114464015 | 0.127081 | 0.209568 |
| MAS1      | 6q25.3   | -0.114447856 | 0.127135 | 0.20964  |
| HULC      | 6p24.3   | 0.114430598  | 0.127193 | 0.209718 |
| TMEM106C  | 12q13.11 | -0.114418429 | 0.127233 | 0.209768 |
| LOC440896 | 9p11.2   | -0.114410536 | 0.12726  | 0.209794 |
| ARSF      | Xp22.33  | -0.11439632  | 0.127307 | 0.209855 |
| OR51B6    | 11p15.4  | 0.114387004  | 0.127339 | 0.209889 |
| IZUMO1R   | 11q21    | -0.114377837 | 0.127369 | 0.209923 |
| EXOC4     | 7q33     | 0.114343105  | 0.127486 | 0.210097 |
| WNT1      | 12q13.12 | -0.114315914 | 0.127577 | 0.21023  |
| HINFP     | 11q23.3  | 0.11429498   | 0.127647 | 0.210328 |
| ZNF343    | 20p13    | -0.114284519 | 0.127682 | 0.210369 |
| GPS1      | 17q25.3  | 0.114236394  | 0.127844 | 0.210595 |
| PMS2P1    | 7q22.1   | 0.114236394  | 0.127844 | 0.210595 |
| RS1       | Xp22.13  | -0.114234209 | 0.127851 | 0.210595 |
| CCDC15    | 11q24.2  | 0.114219656  | 0.1279   | 0.210641 |
| SLX4      | 16p13.3  | -0.114219656 | 0.1279   | 0.210641 |
| TLR3      | 4q35.1   | 0.114194547  | 0.127984 | 0.210762 |
| ASB16     | 17q21.31 | -0.114175716 | 0.128048 | 0.210849 |
| ZIC5      | 13q32.3  | 0.114149205  | 0.128137 | 0.210967 |
| KRTAP3-2  | 17q21.2  | -0.114148093 | 0.128141 | 0.210967 |
| MMADHC    | 2q23.2   | 0.114115038  | 0.128252 | 0.211133 |
| TSPAN2    | 1p13.2   | -0.114110853 | 0.128266 | 0.211139 |
| CNOT9     | 2q35     | -0.114096207 | 0.128315 | 0.211203 |
| TBC1D7    | 6p24.1   | 0.114069006  | 0.128407 | 0.211336 |
| SLC7A3    | Xq13.1   | 0.114018612  | 0.128577 | 0.211597 |
| GPBP1     | 5q11.2   | -0.114012512 | 0.128597 | 0.211597 |
| TSPAN5    | 4q23     | 0.114012512  | 0.128597 | 0.211597 |
| THAP7-AS1 | 22q11.21 | -0.114006235 | 0.128618 | 0.211615 |

|           |            |               |           |           |
|-----------|------------|---------------|-----------|-----------|
| IQSEC2    | Xp11. 22   | 0. 113991589  | 0. 128668 | 0. 211661 |
| ZFPM2     | 8q23. 1    | -0. 113991589 | 0. 128668 | 0. 211661 |
| ELAVL3    | 19p13. 2   | -0. 113973597 | 0. 128729 | 0. 211744 |
| RUNX3     | 1p36. 11   | -0. 113968573 | 0. 128746 | 0. 211754 |
| TRIM5     | 11p15. 4   | 0. 113953926  | 0. 128795 | 0. 211818 |
| AFTPH     | 2p14       | -0. 113941372 | 0. 128837 | 0. 211871 |
| LRRC55    | 11q12. 1   | -0. 113926785 | 0. 128887 | 0. 211934 |
| TCL1A     | 14q32. 13  | -0. 11391635  | 0. 128922 | 0. 211975 |
| FAM117B   | 2q33. 2    | -0. 113909987 | 0. 128944 | 0. 211993 |
| EGLN2     | 19q13. 2   | 0. 113905802  | 0. 128958 | 0. 211999 |
| OR2M3     | 1q44       | 0. 113878746  | 0. 129049 | 0. 212131 |
| RPL12     | 9q33. 3    | 0. 113866047  | 0. 129092 | 0. 212185 |
| SOHLH1    | 9q34. 3    | -0. 113850984 | 0. 129143 | 0. 212251 |
| CLDN22    | 4q35. 1    | 0. 113822053  | 0. 129241 | 0. 212395 |
| TNNI3K    | 1p31. 1    | -0. 113817923 | 0. 129255 | 0. 2124   |
| ZCWPW1    | 7q22. 1    | -0. 113792815 | 0. 12934  | 0. 212522 |
| LRP8      | 1p32. 3    | 0. 113740506  | 0. 129518 | 0. 212796 |
| CPD       | 17q11. 2   | -0. 113730044 | 0. 129553 | 0. 212837 |
| TULP3     | 12p13. 33  | -0. 113700751 | 0. 129652 | 0. 212977 |
| TMEM104   | 17q25. 1   | -0. 113698659 | 0. 12966  | 0. 212977 |
| HK3       | 5q35. 2    | 0. 113686105  | 0. 129702 | 0. 21303  |
| TFB1M     | 6q25. 3    | 0. 113658904  | 0. 129795 | 0. 213164 |
| TBC1D23   | 3q12. 1-q1 | -0. 11364635  | 0. 129837 | 0. 213199 |
| YKT6      | 7p13       | 0. 11364635   | 0. 129837 | 0. 213199 |
| VPS8      | 3q27. 2    | -0. 113581487 | 0. 130058 | 0. 213544 |
| C16ORF90  | 16p13. 3   | -0. 113570533 | 0. 130095 | 0. 213587 |
| C12ORF76  | 12q24. 11  | -0. 113524993 | 0. 13025  | 0. 213824 |
| TTF2      | 1p13. 1    | 0. 113516624  | 0. 130279 | 0. 213854 |
| OR4F6     | 15q26. 3   | 0. 113510988  | 0. 130298 | 0. 213854 |
| ECD       | 10q22. 2   | 0. 113510347  | 0. 1303   | 0. 213854 |
| DUSP1     | 5q35. 1    | -0. 113447576 | 0. 130514 | 0. 214187 |
| ALX4      | 11p11. 2   | -0. 113430573 | 0. 130572 | 0. 214265 |
| OACYLP    | 18q21. 32  | 0. 113421386  | 0. 130604 | 0. 214299 |
| GGT8P     | 2p11. 2    | 0. 113395722  | 0. 130691 | 0. 214414 |
| CABP7     | 22q12. 2   | -0. 113393175 | 0. 1307   | 0. 214414 |
| KCNIP1    | 5q35. 1    | -0. 11339132  | 0. 130706 | 0. 214414 |
| OR51F2    | 11p15. 4   | 0. 113361586  | 0. 130808 | 0. 214564 |
| LOC40094C | 2p25. 2    | -0. 113341956 | 0. 130875 | 0. 214656 |
| FBXO3     | 11p13      | -0. 113336681 | 0. 130893 | 0. 214668 |
| LSM6      | 4q31. 22   | -0. 113305296 | 0. 131    | 0. 214809 |
| ZDHHC4    | 7p22. 1    | 0. 113305296  | 0. 131    | 0. 214809 |
| MAX       | 14q23. 3   | 0. 113301111  | 0. 131015 | 0. 214815 |
| LRCH3     | 3q29       | -0. 113276003 | 0. 131101 | 0. 214922 |
| LOC28437C | 19q13. 42  | 0. 113275745  | 0. 131102 | 0. 214922 |
| RPSAP58   | 19p12      | 0. 113259264  | 0. 131158 | 0. 214997 |
| PGAM5     | 12q24. 33  | -0. 113252987 | 0. 131179 | 0. 215014 |
| TEX35     | 1q25. 2    | 0. 113217969  | 0. 131299 | 0. 215193 |
| CDH6      | 5p13. 3    | -0. 113179754 | 0. 131431 | 0. 215376 |
| LINC01551 | 14q12      | 0. 113179178  | 0. 131433 | 0. 215376 |
| BTNL2     | 6p21. 32   | -0. 113175768 | 0. 131444 | 0. 215378 |
| TYW1      | 7q11. 21   | -0. 113160923 | 0. 131495 | 0. 215443 |
| FAM71B    | 5q33. 3    | -0. 113143334 | 0. 131556 | 0. 215507 |
| OR6Q1     | 11q12. 1   | -0. 113143334 | 0. 131556 | 0. 215507 |
| OPA3      | 19q13. 32  | -0. 113133723 | 0. 131589 | 0. 215543 |

|           |                       |              |          |          |
|-----------|-----------------------|--------------|----------|----------|
| ZDHC19    | 3q29                  | 0.113086401  | 0.131751 | 0.215792 |
| ZNF117    | 7q11.21               | 0.113081414  | 0.131768 | 0.215802 |
| HOXA6     | 7p15.2                | 0.113065927  | 0.131821 | 0.215872 |
| P2RY1     | 3q25.2                | -0.113058398 | 0.131847 | 0.215897 |
| TGFBI     | 5q31.1                | 0.112997719  | 0.132056 | 0.216221 |
| CALD1     | 7q33                  | -0.112993535 | 0.132071 | 0.216227 |
| HLA-DQA1  | 6p21.32               | -0.112964242 | 0.132171 | 0.216374 |
| CCDC73    | 11p13                 | 0.11294541   | 0.132236 | 0.216463 |
| SHQ1      | 3p13                  | -0.112941226 | 0.132251 | 0.216469 |
| CCDC146   | 7q11.23               | 0.112930764  | 0.132287 | 0.216504 |
| BMPR1B    | 4q22.3                | -0.112928672 | 0.132294 | 0.216504 |
| MYADML    | 2p22.3                | 0.112893538  | 0.132415 | 0.216684 |
| UGDH      | 4p14                  | -0.11288264  | 0.132453 | 0.216728 |
| ADSL      | 22q13.1               | -0.112872178 | 0.132489 | 0.216763 |
| BRINP1    | 9q33.1                | -0.112870145 | 0.132496 | 0.216763 |
| MDH2      | 7q11.23               | 0.112863809  | 0.132518 | 0.216781 |
| DCDC2     | 6p22.3                | -0.112859624 | 0.132532 | 0.216787 |
| SLC5A7    | 2q12.3                | -0.112808866 | 0.132708 | 0.217056 |
| DELE1     | 5q31.3                | -0.112805223 | 0.13272  | 0.217059 |
| DKFZP434I | 7p11.2                | -0.11280188  | 0.132732 | 0.21706  |
| MNDA      | 1q23.1                | -0.112796853 | 0.132749 | 0.217071 |
| MTCH1     | 6p21.2                | -0.112748729 | 0.132916 | 0.217325 |
| NFE2L1    | 17q21.32              | -0.11273199  | 0.132974 | 0.21739  |
| XP07      | 8p21.3                | -0.112729898 | 0.132981 | 0.21739  |
| MOXD1     | 6q23.2                | -0.112727805 | 0.132988 | 0.21739  |
| TRMT44    | 4p16.1                | 0.112721528  | 0.13301  | 0.217408 |
| GLIPR2    | 9p13.3                | -0.112644111 | 0.133278 | 0.217829 |
| LHX8      | 1p31.1                | -0.112631419 | 0.133322 | 0.217883 |
| OR2A4     | 6q23.2                | 0.112627372  | 0.133336 | 0.217888 |
| PMP22     | 17p12                 | -0.112600172 | 0.133431 | 0.218025 |
| CELA1     | 12q13.13              | -0.112543692 | 0.133627 | 0.218327 |
| ANKRD42   | 11q14.1               | 0.112485092  | 0.13383  | 0.218642 |
| USP53     | 4q26                  | -0.112420229 | 0.134056 | 0.218993 |
| SPATA16   | 3q26.31               | -0.112393242 | 0.13415  | 0.219129 |
| PRR27     | 4q13.3                | -0.11234221  | 0.134328 | 0.219386 |
| CORO6     | 17q11.2               | 0.112338627  | 0.134341 | 0.219386 |
| L3MBTL2   | 22q13.2               | -0.112338627 | 0.134341 | 0.219386 |
| BCAM      | 19q13.32              | -0.112321888 | 0.134399 | 0.21944  |
| EIF1AY    | Yq11.223              | -0.112321744 | 0.1344   | 0.21944  |
| PPY2P     | 17q11.2               | -0.112317692 | 0.134414 | 0.21944  |
| CCL3      | 17q12                 | -0.112313519 | 0.134428 | 0.21944  |
| MIB2      | 1p36.33               | 0.112313519  | 0.134428 | 0.21944  |
| CALML5    | 10p15.1               | 0.112282248  | 0.134537 | 0.2196   |
| HSFX2     | Xq28                  | -0.112259117 | 0.134618 | 0.219714 |
| ORC5      | 7q22.1-q <sup>2</sup> | -0.112248656 | 0.134655 | 0.219756 |
| MRPS28    | 8q21.13               | -0.11222564  | 0.134735 | 0.219869 |
| MPL       | 1p34.2                | -0.112215178 | 0.134772 | 0.219911 |
| KPNA3     | 13q14.2               | -0.11219007  | 0.13486  | 0.220036 |
| AQP8      | 16p12.1               | -0.112184287 | 0.13488  | 0.220051 |
| SLC46A2   | 9q32                  | -0.112140958 | 0.135032 | 0.220269 |
| ACTR8     | 3p21.1                | -0.112139853 | 0.135036 | 0.220269 |
| CHRNA3    | 15q25.1               | -0.112102191 | 0.135168 | 0.220466 |
| SERINC3   | 20q13.12              | -0.112093821 | 0.135197 | 0.220496 |
| LARP4B    | 10p15.3               | 0.112079175  | 0.135248 | 0.220562 |

|           |           |               |           |           |
|-----------|-----------|---------------|-----------|-----------|
| GUCA1C    | 3q13. 13  | -0. 112067034 | 0. 135291 | 0. 220613 |
| ACSM2A    | 16p12. 3  | -0. 112061278 | 0. 135311 | 0. 220628 |
| RBMY1A1   | Yq11. 223 | -0. 112048691 | 0. 135355 | 0. 220682 |
| MED27     | 9q34. 13  | -0. 112035235 | 0. 135402 | 0. 220741 |
| QRFPR     | 4q27      | -0. 112021151 | 0. 135452 | 0. 220804 |
| KISS1R    | 19p13. 3  | -0. 112003155 | 0. 135515 | 0. 220889 |
| SLC16A10  | 6q21      | -0. 111970372 | 0. 13563  | 0. 221059 |
| OR52W1    | 11p15. 4  | -0. 111924092 | 0. 135793 | 0. 221306 |
| KRTAP12-2 | 21q22. 3  | -0. 11188867  | 0. 135918 | 0. 221491 |
| C22ORF46  | 22q13. 2  | -0. 111884586 | 0. 135932 | 0. 221496 |
| OR2T33    | 1q44      | -0. 111867301 | 0. 135993 | 0. 221576 |
| SULT2A1   | 19q13. 33 | 0. 111863806  | 0. 136005 | 0. 221576 |
| ANKRD30B1 | 2q21. 2   | -0. 111861175 | 0. 136014 | 0. 221576 |
| SELENOT   | 3q25. 1   | -0. 111851108 | 0. 13605  | 0. 221616 |
| UQCRH     | 1p33      | 0. 111826     | 0. 136138 | 0. 221742 |
| RNU6ATAC  | 9q34. 2   | -0. 11182079  | 0. 136157 | 0. 221754 |
| TMEM106A  | 17q21. 31 | 0. 111815596  | 0. 136175 | 0. 221766 |
| NDUFB9    | 8q24. 13  | 0. 111779968  | 0. 136301 | 0. 221952 |
| PAX3      | 2q36. 1   | -0. 111756052 | 0. 136385 | 0. 222072 |
| SNRNP40   | 1p35. 2   | -0. 111729751 | 0. 136478 | 0. 222205 |
| CDCA7     | 2q31. 1   | 0. 111715105  | 0. 13653  | 0. 222271 |
| TAX1BP1   | 7p15. 2   | 0. 111704643  | 0. 136567 | 0. 222313 |
| CD22      | 19q13. 12 | -0. 111687904 | 0. 136626 | 0. 222391 |
| HEYL      | 1p34. 2   | -0. 111681627 | 0. 136648 | 0. 222409 |
| FDX1      | 11q22. 3  | 0. 111646057  | 0. 136774 | 0. 222592 |
| ASIC5     | 4q32. 1   | -0. 111643564 | 0. 136783 | 0. 222592 |
| SRPK3     | Xq28      | 0. 111528885  | 0. 137189 | 0. 223235 |
| SPIN3     | Xp11. 21  | -0. 111514238 | 0. 137241 | 0. 223301 |
| CATSPER2  | 15q15. 3  | 0. 111484945  | 0. 137344 | 0. 223452 |
| FRA10AC1  | 10q23. 33 | -0. 111480761 | 0. 137359 | 0. 223452 |
| PRMT5     | 14q11. 2  | 0. 111478668  | 0. 137367 | 0. 223452 |
| ANG       | 14q11. 2  | 0. 111451468  | 0. 137463 | 0. 22359  |
| PRKAG3    | 2q35      | 0. 111437206  | 0. 137514 | 0. 223655 |
| CTNNBIP1  | 1p36. 22  | 0. 11142636   | 0. 137553 | 0. 223699 |
| RTN4      | 2p16. 1   | 0. 111422175  | 0. 137567 | 0. 223705 |
| P3H3      | 12p13. 31 | -0. 11141799  | 0. 137582 | 0. 223711 |
| NUDCD1    | 8q23. 1   | -0. 111403344 | 0. 137634 | 0. 223777 |
| UBXN10    | 1p36. 12  | 0. 111397067  | 0. 137657 | 0. 223796 |
| PPP1R3D   | 20q13. 33 | 0. 11138242   | 0. 137709 | 0. 223831 |
| RAP1A     | 1p13. 2   | -0. 11138242  | 0. 137709 | 0. 223831 |
| GHRL      | 3p25. 3   | -0. 111381432 | 0. 137712 | 0. 223831 |
| FLJ37201  | 10q23. 31 | -0. 111377247 | 0. 137727 | 0. 223837 |
| SREK1IP1  | 5q12. 3   | -0. 111367774 | 0. 137761 | 0. 223868 |
| NISCH     | 3p21. 1   | -0. 111365681 | 0. 137768 | 0. 223868 |
| CTTNBP2NL | 1p13. 2   | 0. 111305003  | 0. 137984 | 0. 2242   |
| OPRM1     | 6q25. 2   | -0. 111293892 | 0. 138024 | 0. 224246 |
| SRP19     | 5q22. 2   | -0. 111227586 | 0. 13826  | 0. 224606 |
| HOXA5     | 7p15. 2   | -0. 111225493 | 0. 138268 | 0. 224606 |
| GYPB      | 4q31. 21  | -0. 111152623 | 0. 138528 | 0. 22501  |
| GPBP1L1   | 1p34. 1   | 0. 111141799  | 0. 138566 | 0. 225055 |
| RNF2      | 1q25. 3   | 0. 11113343   | 0. 138596 | 0. 225085 |
| SLITRK4   | Xq27. 3   | -0. 111120875 | 0. 138641 | 0. 225133 |
| MT1F      | 16q13     | -0. 111118783 | 0. 138649 | 0. 225133 |
| ALCAM     | 3q13. 11  | -0. 111114598 | 0. 138663 | 0. 225139 |

|           |           |              |          |          |
|-----------|-----------|--------------|----------|----------|
| AS3MT     | 10q24.32  | -0.11109786  | 0.138723 | 0.225218 |
| SNORD115  | 15q11.2   | -0.111092935 | 0.138741 | 0.225229 |
| PREP      | 6q21      | 0.111087398  | 0.138761 | 0.225243 |
| MBNL3     | Xq26.2    | -0.111066474 | 0.138836 | 0.225346 |
| CFB       | 6p21.33   | 0.111049735  | 0.138895 | 0.225425 |
| MYH15     | 3q13.13   | 0.111032066  | 0.138959 | 0.225509 |
| KERA      | 12q21.33  | 0.111020665  | 0.139    | 0.225557 |
| CLRN1-AS1 | 3q25.1    | 0.111008896  | 0.139042 | 0.225607 |
| HMGN4     | 6p22.2    | 0.110978595  | 0.13915  | 0.225765 |
| VMAC      | 19p13.3   | 0.110924194  | 0.139345 | 0.226063 |
| P4HTM     | 3p21.31 3 | 0.110907455  | 0.139405 | 0.226142 |
| GSTM4     | 1p13.3    | 0.11090327   | 0.13942  | 0.226148 |
| AUTS2     | 7q11.22   | -0.11087607  | 0.139518 | 0.226288 |
| DAPK3     | 19p13.3   | 0.110855146  | 0.139593 | 0.226385 |
| ATP6V1E1  | 22q11.21  | 0.110853054  | 0.139601 | 0.226385 |
| TMEM117   | 12q12     | -0.1108405   | 0.139646 | 0.22644  |
| SLC2A6    | 9q34.2    | 0.110830038  | 0.139684 | 0.226471 |
| APOB      | 2p24.1    | -0.110827946 | 0.139691 | 0.226471 |
| ANPEP     | 15q26.1   | -0.110825853 | 0.139699 | 0.226471 |
| COA8      | 14q32.33  | 0.110809114  | 0.139759 | 0.22655  |
| UGT2B7    | 4q13.2    | 0.110803069  | 0.13978  | 0.226561 |
| TPI1P3    | 6q22.1    | 0.110800941  | 0.139788 | 0.226561 |
| EXOC8     | 1q42.2    | -0.11079656  | 0.139804 | 0.226568 |
| HRG       | 3q27.3    | 0.110730213  | 0.140043 | 0.226922 |
| HLA-L     | 6p22.1    | 0.110729605  | 0.140045 | 0.226922 |
| SLC39A10  | 2q32.3    | 0.110717051  | 0.14009  | 0.226976 |
| LHFPL5    | 6p21.31   | -0.110708926 | 0.140119 | 0.227005 |
| UMOD      | 16p12.3   | -0.110700809 | 0.140149 | 0.227034 |
| ST6GALNAC | 17q25.1   | 0.110671019  | 0.140256 | 0.22719  |
| CXORF65   | Xq13.1    | 0.110641309  | 0.140363 | 0.227336 |
| ITPRID2   | 2q31.3    | 0.110639633  | 0.140369 | 0.227336 |
| SP140     | 2q37.1    | -0.110624987 | 0.140422 | 0.227404 |
| TDRD12    | 19q13.11  | -0.1106194   | 0.140442 | 0.227418 |
| MAZ       | 16p11.2   | 0.11061034   | 0.140475 | 0.227452 |
| RECQL     | 12p12.1   | -0.110593602 | 0.140535 | 0.227531 |
| BTC       | 4q13.3    | -0.110590521 | 0.140546 | 0.227531 |
| TIFAB     | 5q31.1    | -0.110574942 | 0.140603 | 0.227604 |
| SUSD6     | 14q24.1   | -0.110570586 | 0.140619 | 0.227611 |
| ROPN1     | 3q21.1    | 0.110564267  | 0.140641 | 0.22763  |
| MRPS35    | 12p11.22  | 0.11054757   | 0.140702 | 0.227709 |
| GSR       | 8p12      | -0.110530831 | 0.140762 | 0.22777  |
| ITCH      | 20q11.22  | -0.110530831 | 0.140762 | 0.22777  |
| OR10A2    | 11p15.4   | 0.110501901  | 0.140867 | 0.227921 |
| CCDC81    | 11q14.2   | 0.110491076  | 0.140906 | 0.227966 |
| APOBEC3F  | 22q13.1   | -0.110474337 | 0.140967 | 0.228045 |
| ARMS2     | 10q26.13  | -0.110453308 | 0.141043 | 0.22815  |
| B4GALT7   | 5q35.3    | 0.110442952  | 0.14108  | 0.228192 |
| DI01      | 1p32.3    | -0.110430997 | 0.141124 | 0.228241 |
| NFKB1     | 4q24      | -0.110428305 | 0.141133 | 0.228241 |
| UNC45A    | 15q26.1   | 0.110392735  | 0.141262 | 0.228431 |
| ERICH4    | 19q13.2   | -0.11034243  | 0.141445 | 0.228708 |
| IRS1      | 2q36.3    | 0.110288118  | 0.141642 | 0.229007 |
| TTLL2     | 6q27      | -0.110285144 | 0.141653 | 0.229007 |
| DTD1      | 20p11.23  | 0.110275563  | 0.141687 | 0.229045 |

|            |           |              |          |          |
|------------|-----------|--------------|----------|----------|
| CLEC7A     | 12p13.2   | -0.110271379 | 0.141703 | 0.229051 |
| HNRNPA0    | 5q31.2    | -0.110267194 | 0.141718 | 0.229057 |
| TCP10L2    | 6q27      | -0.110208105 | 0.141933 | 0.229385 |
| 10-Mar     | 17q23.2   | -0.110202392 | 0.141954 | 0.229401 |
| USP6NL     | 10p14     | 0.110189777  | 0.141999 | 0.229456 |
| DAO        | 12q24.11  | -0.110180584 | 0.142033 | 0.229492 |
| PLIN2      | 9p22.1    | -0.110164668 | 0.142091 | 0.229567 |
| PPIE       | 1p34.2    | 0.110131191  | 0.142213 | 0.229745 |
| MCEE       | 2p13.3    | -0.110124914 | 0.142236 | 0.229764 |
| MAT2B      | 5q34      | 0.110108175  | 0.142297 | 0.229831 |
| STAMBPL1   | 10q23.31  | 0.11010399   | 0.142312 | 0.229831 |
| TSSC4      | 11p15.5   | 0.11010399   | 0.142312 | 0.229831 |
| C9ORF116   | 9q34.3    | 0.110053774  | 0.142495 | 0.230108 |
| KITLG      | 12q21.32  | 0.110047496  | 0.142518 | 0.230127 |
| FAM86JP    | 3q21.2    | 0.110014019  | 0.14264  | 0.230306 |
| AQP11      | 11q14.1   | -0.110003557 | 0.142679 | 0.230349 |
| CD24       | 6q21      | 0.109995188  | 0.142709 | 0.230379 |
| HHLA3      | 1p31.1    | 0.109984726  | 0.142747 | 0.230422 |
| CERS6      | 2q24.3    | -0.109974264 | 0.142786 | 0.230466 |
| PUS7       | 7q22.3    | -0.109967987 | 0.142809 | 0.230467 |
| TBC1D26    | 17p12     | 0.109967644  | 0.14281  | 0.230467 |
| RPL35      | 9q33.3    | 0.109942879  | 0.1429   | 0.230595 |
| BTN3A3     | 6p22.2    | -0.109907309 | 0.14303  | 0.230786 |
| POM121L1C  | 22q11.23  | -0.109861334 | 0.143199 | 0.231039 |
| GAS1       | 9q21.33   | -0.109852907 | 0.14323  | 0.231039 |
| RBM19      | 12q24.13- | -0.109850815 | 0.143237 | 0.231039 |
| ANAPC1     | 2q13      | -0.109850815 | 0.143237 | 0.231039 |
| LINC00653  | 20p11.23  | -0.109848723 | 0.143245 | 0.231039 |
| NTRK1      | 1q23.1    | -0.109830995 | 0.14331  | 0.231107 |
| LRRC37A6F  | 10p12.1   | -0.109827799 | 0.143322 | 0.231107 |
| TRAPPC2    | Xp22.2    | 0.109827799  | 0.143322 | 0.231107 |
| RABGAP1    | 9q33.2-q3 | -0.109800598 | 0.143421 | 0.231249 |
| PLEKHG4    | 16q22.1   | -0.109785952 | 0.143475 | 0.231304 |
| MRGPRE     | 11p15.4   | -0.109785095 | 0.143478 | 0.231304 |
| SMC4       | 3q25.33   | 0.109769213  | 0.143537 | 0.231379 |
| SIGLEC17F  | 19q13.41  | -0.109765028 | 0.143552 | 0.231385 |
| SLC27A5    | 19q13.43  | -0.109746197 | 0.143621 | 0.231478 |
| MPPED1     | 22q13.2   | -0.109741221 | 0.143639 | 0.231488 |
| IMPACT     | 18q11.2   | -0.109731551 | 0.143675 | 0.231527 |
| SUSD1      | 9q31.3-q3 | -0.109706442 | 0.143767 | 0.231657 |
| KRTAP5-8   | 11q13.4   | 0.109693792  | 0.143814 | 0.231713 |
| MTIF2      | 2p16.1    | 0.109683426  | 0.143852 | 0.231756 |
| UQCRHL     | 1p36.21   | 0.109679242  | 0.143867 | 0.231762 |
| C10ORF82   | 10q25.3   | -0.109645659 | 0.143991 | 0.231942 |
| LOC1002712 | 2p22.3    | 0.10963751   | 0.144021 | 0.231972 |
| MIR924HG   | 18q12.2-c | 0.109617304  | 0.144095 | 0.232073 |
| RCOR3      | 1q32.2-q3 | -0.109603917 | 0.144144 | 0.232134 |
| SERPINA12  | 14q32.13  | -0.109600637 | 0.144156 | 0.232134 |
| PAX7       | 1p36.13   | 0.109579282  | 0.144235 | 0.232226 |
| DMTF1      | 7q21.12   | -0.109578809 | 0.144237 | 0.232226 |
| TM9SF2     | 13q32.3   | -0.109547423 | 0.144352 | 0.232394 |
| PATE4      | 11q24.2   | -0.109540766 | 0.144377 | 0.232415 |
| UNG        | 12q24.11  | 0.109505576  | 0.144507 | 0.232605 |
| FOXD4L1    | 2q14.1    | 0.109499299  | 0.14453  | 0.232623 |

|             |          |              |          |          |
|-------------|----------|--------------|----------|----------|
| MRPL32      | 7p14.1   | 0.109495172  | 0.144545 | 0.232629 |
| C9ORF131    | 9p13.3   | -0.109489342 | 0.144566 | 0.232645 |
| ZNF205-AS1  | 16p13.3  | -0.109478375 | 0.144607 | 0.232691 |
| ZNF229      | 19q13.31 | -0.109453267 | 0.1447   | 0.232822 |
| SNUPN       | 15q24.2  | 0.109440713  | 0.144746 | 0.232871 |
| TMEM184C    | 4q31.23  | -0.109438621 | 0.144754 | 0.232871 |
| CAB39       | 2q37.1   | 0.109426067  | 0.1448   | 0.232927 |
| RAPSN       | 11p11.2  | 0.109400867  | 0.144893 | 0.233058 |
| OVCH1       | 12p11.22 | -0.109388687 | 0.144938 | 0.233112 |
| LINC00173   | 12q24.22 | -0.109378797 | 0.144975 | 0.233152 |
| DLGAP1-AS1  | 18p11.31 | 0.109317264  | 0.145202 | 0.233499 |
| MYOM2       | 8p23.3   | -0.10929634  | 0.14528  | 0.233605 |
| STAM2       | 2q23.3   | -0.109292156 | 0.145295 | 0.233611 |
| ABHD1       | 2p23.3   | -0.109278613 | 0.145346 | 0.233673 |
| CDC14C      | 7p12.3   | -0.109267333 | 0.145387 | 0.233721 |
| DMRT1       | 9p24.3   | 0.109260644  | 0.145412 | 0.233742 |
| CTNNAL1     | 9q31.3   | 0.109250309  | 0.145451 | 0.233785 |
| CAMK4       | 5q22.1   | -0.109244032 | 0.145474 | 0.233804 |
| ZFP41       | 8q24.3   | -0.109202184 | 0.145629 | 0.234034 |
| SLC35D1     | 1p31.3   | -0.10918963  | 0.145676 | 0.234091 |
| GDF3        | 12p13.31 | 0.109166624  | 0.145761 | 0.234203 |
| MRPS23      | 17q22    | 0.109164522  | 0.145769 | 0.234203 |
| ZSCAN9      | 6p22.1   | 0.109139414  | 0.145862 | 0.234334 |
| CNBD2       | 20q11.23 | -0.109088108 | 0.146053 | 0.234621 |
| CNPY1       | 7q36.3   | 0.109030246  | 0.146268 | 0.234948 |
| GPATCH2L    | 14q24.3  | -0.109026426 | 0.146282 | 0.234952 |
| ALAS2       | Xp11.21  | -0.108954599 | 0.14655  | 0.235363 |
| POU4F2      | 4q31.22  | -0.108948624 | 0.146572 | 0.23538  |
| PLRG1       | 4q31.3   | -0.108934363 | 0.146625 | 0.235418 |
| OR51B5      | 11p15.4  | -0.108934025 | 0.146627 | 0.235418 |
| SPINK4      | 9p13.3   | 0.108932727  | 0.146631 | 0.235418 |
| PLEKHA4     | 19q13.33 | 0.108917624  | 0.146688 | 0.23549  |
| NOXRED1     | 14q24.3  | -0.108886239 | 0.146805 | 0.235659 |
| FOXF1       | 16q24.1  | -0.108867407 | 0.146875 | 0.235753 |
| GLI2        | 2q14.2   | 0.108863223  | 0.146891 | 0.235759 |
| BGN         | Xq28     | 0.108806729  | 0.147102 | 0.236079 |
| SLC26A4-AS1 | 7q22.3   | -0.1088027   | 0.147117 | 0.236084 |
| GMEB1       | 1p35.3   | -0.108792083 | 0.147157 | 0.236112 |
| OR51A2      | 11p15.4  | 0.108791667  | 0.147158 | 0.236112 |
| TOMM22      | 22q13.1  | 0.108777436  | 0.147211 | 0.23616  |
| VWA7        | 6p21.33  | -0.108777436 | 0.147211 | 0.23616  |
| SUSD5       | 3p22.3   | -0.10875442  | 0.147298 | 0.236279 |
| TNFRSF10C   | 8p21.3   | 0.108746051  | 0.147329 | 0.23631  |
| ARMC8       | 3q22.3   | -0.108735589 | 0.147368 | 0.236354 |
| CLCA1       | 1p22.3   | -0.108712797 | 0.147453 | 0.236472 |
| CEL         | 9q34.13  | -0.108702111 | 0.147493 | 0.236517 |
| STX3        | 11q12.1  | 0.108679095  | 0.14758  | 0.236637 |
| DMTN        | 8p21.3   | 0.108670726  | 0.147611 | 0.236649 |
| PDCD2L      | 19q13.11 | 0.108670726  | 0.147611 | 0.236649 |
| RNF19A      | 8q22.2   | -0.108662356 | 0.147642 | 0.23668  |
| LINC0041C   | 13q31.3  | -0.108638422 | 0.147732 | 0.236805 |
| SLC25A35    | 17p13.1  | -0.108626786 | 0.147776 | 0.236856 |
| C5ORF34     | 5p12     | 0.108601678  | 0.14787  | 0.236988 |
| SBF1        | 22q13.33 | 0.108578662  | 0.147957 | 0.237088 |

|           |            |               |           |           |
|-----------|------------|---------------|-----------|-----------|
| ZNF32     | 10q11. 21  | -0. 108578662 | 0. 147957 | 0. 237088 |
| BLK       | 8p23. 1    | -0. 108572953 | 0. 147978 | 0. 237088 |
| ACAD8     | 11q25      | -0. 108572385 | 0. 14798  | 0. 237088 |
| CCDC63    | 12q24. 11  | 0. 108554249  | 0. 148048 | 0. 237179 |
| AURKAP1   | 1q41       | 0. 108515891  | 0. 148192 | 0. 237391 |
| SLC39A2   | 14q11. 2   | 0. 108508539  | 0. 14822  | 0. 237416 |
| CDH13     | 16q23. 3   | -0. 108484506 | 0. 14831  | 0. 237542 |
| DDX21     | 10q22. 1   | -0. 108463583 | 0. 148389 | 0. 237649 |
| APOL6     | 22q12. 3   | -0. 108417551 | 0. 148562 | 0. 237907 |
| UHRF2     | 9p24. 1    | -0. 108375704 | 0. 14872  | 0. 238141 |
| AJAP1     | 1p36. 32   | -0. 108366345 | 0. 148755 | 0. 238178 |
| STXBP6    | 14q12      | -0. 108346411 | 0. 148831 | 0. 238279 |
| MYL1      | 2q34       | 0. 108333639  | 0. 148879 | 0. 238337 |
| BRD9      | 5p15. 33   | 0. 10831084   | 0. 148965 | 0. 238443 |
| HTR3A     | 11q23. 2   | 0. 108306882  | 0. 14898  | 0. 238443 |
| DPY19L2P2 | 7q22. 1    | -0. 108306656 | 0. 148981 | 0. 238443 |
| TTR       | 18q12. 1   | -0. 108276883 | 0. 149093 | 0. 238604 |
| CLPSL2    | 6p21. 31   | -0. 108272337 | 0. 14911  | 0. 238612 |
| TPPP3     | 16q22. 1   | -0. 108250162 | 0. 149194 | 0. 238727 |
| SPCS1     | 3p21. 1    | 0. 108241793  | 0. 149226 | 0. 238759 |
| CYP17A1   | 10q24. 32  | 0. 108214025  | 0. 149331 | 0. 238908 |
| GJC3      | 7q22. 1    | -0. 108210089 | 0. 149346 | 0. 238912 |
| RPL24     | 3q12. 3    | 0. 108197853  | 0. 149392 | 0. 238967 |
| XPA       | 9q22. 33   | -0. 108181114 | 0. 149455 | 0. 239049 |
| GLT8D2    | 12q23. 3   | -0. 108174837 | 0. 149479 | 0. 239068 |
| TXLNGY    | Yq11. 222- | -0. 108148117 | 0. 14958  | 0. 239211 |
| CREB1     | 2q33. 3    | -0. 108143452 | 0. 149598 | 0. 23922  |
| CHRN3     | 8p11. 21   | -0. 108117555 | 0. 149696 | 0. 239358 |
| PRPF6     | 20q13. 33  | 0. 108112067  | 0. 149717 | 0. 239372 |
| MAPT-AS1  | 17q21. 31  | -0. 108064323 | 0. 149898 | 0. 239638 |
| MAGI1     | 3p14. 1    | -0. 10806185  | 0. 149907 | 0. 239638 |
| SLC9A8    | 20q13. 13  | 0. 108049296  | 0. 149955 | 0. 239695 |
| PGLYRP3   | 1q21. 3    | 0. 108030481  | 0. 150026 | 0. 23979  |
| MAGIX     | Xp11. 23   | 0. 108020003  | 0. 150066 | 0. 239834 |
| ORM1      | 9q32       | 0. 1080098    | 0. 150104 | 0. 239856 |
| IFI30     | 19p13. 11  | 0. 108009541  | 0. 150105 | 0. 239856 |
| ANP32C    | 4q32. 3    | 0. 108006818  | 0. 150116 | 0. 239856 |
| MED26     | 19p13. 11  | 0. 108001172  | 0. 150137 | 0. 239871 |
| NKX2-5    | 5q35. 1    | 0. 107995831  | 0. 150158 | 0. 239871 |
| ZCCHC4    | 4p15. 2    | -0. 107994895 | 0. 150161 | 0. 239871 |
| TAS2R7    | 12p13. 2   | -0. 107972661 | 0. 150246 | 0. 239985 |
| NEMP2     | 2q32. 2    | 0. 107969786  | 0. 150256 | 0. 239985 |
| MGAM2     | 7q34       | -0. 107958915 | 0. 150298 | 0. 240032 |
| ZSCAN5B   | 19q13. 43  | -0. 107922451 | 0. 150436 | 0. 240234 |
| GSTM2     | 1p13. 3    | -0. 107917477 | 0. 150455 | 0. 240245 |
| CYP1A2    | 15q24. 1   | -0. 107910341 | 0. 150482 | 0. 240269 |
| USP6      | 17p13. 2   | -0. 107888184 | 0. 150567 | 0. 240385 |
| UGT8      | 4q26       | 0. 107884     | 0. 150583 | 0. 240391 |
| PIK3AP1   | 10q24. 1   | -0. 107844245 | 0. 150734 | 0. 240613 |
| CLDN10    | 13q32. 1   | 0. 107794085  | 0. 150925 | 0. 240899 |
| ZNF711    | Xq21. 1    | -0. 107783567 | 0. 150965 | 0. 240944 |
| WASHC5    | 8q24. 13   | -0. 10776892  | 0. 151021 | 0. 241014 |
| PAM       | 5q21. 1    | -0. 107758458 | 0. 151061 | 0. 241058 |
| TBC1D21   | 15q24. 1   | 0. 107741775  | 0. 151125 | 0. 241135 |



|           |            |              |          |          |
|-----------|------------|--------------|----------|----------|
| MYLK      | 3q21. 1    | -0.107739627 | 0.151133 | 0.241135 |
| MYO1F     | 19p13. 2   | -0.107735442 | 0.151149 | 0.241141 |
| MFSD3     | 8q24. 3    | 0.107724981  | 0.151189 | 0.241178 |
| NT5C3A    | 7p14. 3    | 0.107722888  | 0.151197 | 0.241178 |
| GCSH      | 16q23. 2   | 0.107716611  | 0.151221 | 0.241178 |
| TNFRSF1B  | 1p36. 22   | -0.107716611 | 0.151221 | 0.241178 |
| TOR3A     | 1q25. 2    | 0.107712427  | 0.151237 | 0.241185 |
| LY96      | 8q21. 11   | -0.107695688 | 0.151301 | 0.241261 |
| PTS       | 11q23. 1   | 0.107693595  | 0.151309 | 0.241261 |
| MYL7      | 7p13       | -0.107683515 | 0.151347 | 0.241303 |
| ZNF799    | 19p13. 2   | -0.107678949 | 0.151365 | 0.241312 |
| FAM114A1  | 4p14       | -0.107647563 | 0.151485 | 0.24147  |
| LOC440173 | 9q21. 33   | -0.107646658 | 0.151488 | 0.24147  |
| NLRP7     | 19q13. 42  | 0.10764172   | 0.151507 | 0.241481 |
| SLC12A8   | 3q21. 2    | -0.107620363 | 0.151589 | 0.241592 |
| RPAP2     | 1p22. 1    | -0.107601532 | 0.151661 | 0.241687 |
| MLC1      | 22q13. 33  | 0.107597347  | 0.151677 | 0.241693 |
| SPINK9    | 5q32       | -0.107585112 | 0.151723 | 0.241749 |
| EPHB3     | 3q27. 1    | 0.107578516  | 0.151749 | 0.24177  |
| MEF2D     | 1q22       | -0.107501098 | 0.152045 | 0.242223 |
| MRPS24    | 7p13       | 0.107419497  | 0.152358 | 0.242702 |
| MARVELD1  | 10q24. 2   | 0.10740485   | 0.152415 | 0.242772 |
| DCLRE1C   | 10p13      | 0.107383927  | 0.152495 | 0.242881 |
| UBD       | 6p22. 1    | 0.107375557  | 0.152527 | 0.242913 |
| F13A1     | 6p25. 1    | -0.107365095 | 0.152567 | 0.242958 |
| INPP5D    | 2q37. 1    | -0.107356726 | 0.152599 | 0.242969 |
| ZNF35     | 3p21. 31   | -0.107350449 | 0.152624 | 0.242969 |
| PNPLA6    | 19p13. 2   | 0.107344172  | 0.152648 | 0.242969 |
| BPIFA3    | 20q11. 21  | -0.107341111 | 0.152659 | 0.242969 |
| OR13C4    | 9q31. 1    | -0.107341111 | 0.152659 | 0.242969 |
| PAGE3     | Xp11. 21   | 0.107341111  | 0.152659 | 0.242969 |
| POTED     | 21q11. 2   | 0.107341111  | 0.152659 | 0.242969 |
| PDLIM4    | 5q31. 1    | 0.107323248  | 0.152728 | 0.243059 |
| MAN1B1-D1 | 9q34. 3    | -0.107308602 | 0.152785 | 0.243129 |
| PTK7      | 6p21. 1    | 0.107291863  | 0.152849 | 0.243212 |
| ETNPPL    | 4q25       | 0.107278984  | 0.152898 | 0.243272 |
| SRSF3     | 6p21. 31-1 | 0.107270939  | 0.152929 | 0.243302 |
| RABL2A    | 2q14. 1    | 0.107258385  | 0.152978 | 0.243359 |
| CENPT     | 16q22. 1   | 0.1072542    | 0.152994 | 0.243359 |
| SURF2     | 9q34. 2    | 0.107252108  | 0.153002 | 0.243359 |
| DNAH12    | 3p14. 3    | -0.107236696 | 0.153061 | 0.243434 |
| PICSAR    | 21q22. 3   | 0.10722037   | 0.153124 | 0.243515 |
| MYO3B     | 2q31. 1    | -0.107204545 | 0.153185 | 0.243592 |
| ACP7      | 19q13. 2   | -0.107182022 | 0.153272 | 0.243711 |
| KPRP      | 1q21. 3    | 0.107166719  | 0.153331 | 0.243786 |
| OR2T10    | 1q44       | -0.107150071 | 0.153395 | 0.243868 |
| CYP19A1   | 15q21. 2   | -0.107137084 | 0.153446 | 0.243922 |
| NPL       | 1q25. 3    | -0.107134936 | 0.153454 | 0.243922 |
| BRF1      | 14q32. 33  | -0.107122382 | 0.153502 | 0.24398  |
| MGRN1     | 16p13. 3   | 0.107116105  | 0.153527 | 0.243999 |
| VSTM2A    | 7p11. 2    | -0.107097121 | 0.1536   | 0.244096 |
| RNASE3    | 14q11. 2   | 0.107039992  | 0.153821 | 0.244428 |
| WAS       | Xp11. 23   | -0.107026134 | 0.153874 | 0.244494 |
| PJA1      | Xq13. 1    | 0.106986379  | 0.154028 | 0.244719 |

|           |          |              |          |          |
|-----------|----------|--------------|----------|----------|
| ATAD3C    | 1p36.33  | -0.106982194 | 0.154044 | 0.244725 |
| DNAJC1    | 10p12.31 | 0.106971732  | 0.154085 | 0.24477  |
| HUS1      | 7p12.3   | -0.106959178 | 0.154133 | 0.244828 |
| SERPINB8  | 18q22.1  | 0.106865022  | 0.154498 | 0.245388 |
| BEND7     | 10p13    | 0.10685456   | 0.154539 | 0.245433 |
| GAS2L1    | 22q12.2  | 0.106848283  | 0.154563 | 0.245452 |
| ARL5B     | 10p12.31 | -0.106835729 | 0.154612 | 0.24551  |
| WIPI2     | 7p22.1   | -0.106800159 | 0.15475  | 0.24571  |
| DPPA2P3   | 3q29     | -0.106795347 | 0.154769 | 0.24572  |
| FKBP9P1   | 7p11.2   | -0.10679179  | 0.154783 | 0.245722 |
| PNMA2     | 8p21.2   | -0.106754127 | 0.154929 | 0.245935 |
| G3BP1     | 5q33.1   | -0.106731111 | 0.155019 | 0.246058 |
| GNG3      | 11q12.3  | -0.106693449 | 0.155165 | 0.246271 |
| CAVIN1    | 17q21.2  | 0.106682987  | 0.155206 | 0.246316 |
| MPP5      | 14q23.3  | 0.106653694  | 0.15532  | 0.246477 |
| CRTAC1    | 10q24.2  | -0.106647417 | 0.155344 | 0.246497 |
| TNFSF12-1 | 17p13.1  | 0.106630901  | 0.155409 | 0.246579 |
| SLN       | 11q22.3  | 0.106626635  | 0.155425 | 0.246586 |
| TMEM246   | 9q31.1   | 0.106613939  | 0.155475 | 0.246645 |
| RIT2      | 18q12.3  | -0.106546458 | 0.155738 | 0.247043 |
| OR5K2     | 3q11.2   | -0.106534182 | 0.155786 | 0.247099 |
| KANK4     | 1p31.3   | 0.106513506  | 0.155867 | 0.247208 |
| HIST1H2BC | 6p22.2   | 0.106505545  | 0.155898 | 0.247237 |
| FBN2      | 5q23.3   | -0.106500952 | 0.155916 | 0.247246 |
| SFT2D2    | 1q24.2   | -0.106494675 | 0.15594  | 0.247266 |
| ARAF      | Xp11.3   | 0.106488398  | 0.155965 | 0.247285 |
| MAP3K1    | 5q11.2   | -0.106484213 | 0.155981 | 0.247291 |
| VEGFC     | 4q34.3   | -0.106480028 | 0.155998 | 0.247297 |
| RESP18    | 2q35     | -0.106445407 | 0.156133 | 0.247492 |
| MYL3      | 3p21.31  | -0.10642062  | 0.15623  | 0.247626 |
| SMG1P1    | 16p12.2  | -0.106384003 | 0.156373 | 0.247834 |
| ZNF214    | 11p15.4  | -0.106367041 | 0.15644  | 0.24792  |
| INSL6     | 9p24.1   | 0.106340445  | 0.156544 | 0.248065 |
| LINC00323 | 21q22.2  | 0.106332584  | 0.156575 | 0.248087 |
| DSN1      | 20q11.23 | 0.106329379  | 0.156587 | 0.248087 |
| LMX1A     | 1q23.3   | -0.106327395 | 0.156595 | 0.248087 |
| PCNA      | 20p12.3  | 0.106323102  | 0.156612 | 0.248087 |
| TRAF3IP3  | 1q32.2   | -0.106321009 | 0.15662  | 0.248087 |
| BSX       | 11q24.1  | 0.106314005  | 0.156648 | 0.248111 |
| UBL7      | 15q24.1  | 0.106287532  | 0.156751 | 0.248256 |
| CCDC28B   | 1p35.2   | -0.106272885 | 0.156809 | 0.248327 |
| KCNK10    | 14q31.3  | -0.106262479 | 0.15685  | 0.248372 |
| CFC1B     | 2q21.1   | -0.106236987 | 0.15695  | 0.248511 |
| CGA       | 6q14.3   | -0.106218435 | 0.157023 | 0.248607 |
| RIT1      | 1q22     | 0.10619756   | 0.157105 | 0.248717 |
| TLR2      | 4q31.3   | -0.106189191 | 0.157138 | 0.248749 |
| BTB       | 3p25.1   | -0.106180821 | 0.15717  | 0.248775 |
| KLHDC8A   | 1q32.1   | -0.106178729 | 0.157179 | 0.248775 |
| MAGT1     | Xq21.1   | -0.106174544 | 0.157195 | 0.248781 |
| LOC652276 | 16p13.3  | 0.106145251  | 0.15731  | 0.248944 |
| SNORA48   | 17p13.1  | -0.106107034 | 0.157461 | 0.249162 |
| RCN2      | 15q24.3  | -0.10609922  | 0.157491 | 0.249184 |
| LYN       | 8q12.1   | -0.106097127 | 0.1575   | 0.249184 |
| GABRB2    | 5q34     | -0.106072019 | 0.157598 | 0.249321 |

|           |                        |               |           |           |
|-----------|------------------------|---------------|-----------|-----------|
| TDRKH     | 1q21. 3                | -0. 106051095 | 0. 157681 | 0. 249432 |
| DLAT      | 11q23. 1               | -0. 106046911 | 0. 157697 | 0. 249438 |
| ABI3      | 17q21. 32              | -0. 106023895 | 0. 157788 | 0. 249562 |
| LPP       | 3q27. 3-q <sup>2</sup> | -0. 10601971  | 0. 157805 | 0. 249568 |
| OCLN      | 5q13. 2                | 0. 106011341  | 0. 157838 | 0. 2496   |
| PHKA1     | Xq13. 1                | -0. 105969493 | 0. 158003 | 0. 249842 |
| POLR2J3   | 7q22. 1                | 0. 105954847  | 0. 15806  | 0. 249913 |
| FBX036    | 2q36. 3                | -0. 105942293 | 0. 15811  | 0. 249972 |
| GLTPD2    | 17p13. 2               | 0. 105933713  | 0. 158144 | 0. 250006 |
| TFAP2D    | 6p12. 3                | 0. 105927732  | 0. 158168 | 0. 250023 |
| FOXO4     | Xq13. 1                | -0. 105921369 | 0. 158193 | 0. 250043 |
| OR6K2     | 1q23. 1                | -0. 105890556 | 0. 158314 | 0. 250176 |
| SDR16C6P  | 8q12. 1                | -0. 105890556 | 0. 158314 | 0. 250176 |
| VCY       | Yq11. 221              | 0. 105890556  | 0. 158314 | 0. 250176 |
| RBM12B-AS | 8q22. 1                | -0. 105885855 | 0. 158333 | 0. 250186 |
| LOC100129 | 10p11. 1               | 0. 105877634  | 0. 158365 | 0. 250217 |
| IRF1      | 5q31. 1                | 0. 105873245  | 0. 158383 | 0. 250225 |
| CWF19L2   | 11q22. 3               | -0. 105858599 | 0. 158441 | 0. 250297 |
| ATG10     | 5q14. 1-q1             | -0. 105814659 | 0. 158615 | 0. 250532 |
| TRIM38    | 6p22. 2                | -0. 105814659 | 0. 158615 | 0. 250532 |
| GPR3      | 1p36. 11               | -0. 105774904 | 0. 158772 | 0. 250761 |
| SETD9     | 5q11. 2                | 0. 10576235   | 0. 158822 | 0. 250819 |
| HS3ST6    | 16p13. 3               | -0. 105723407 | 0. 158976 | 0. 251043 |
| ASB10     | 7q36. 1                | -0. 105718525 | 0. 158995 | 0. 251054 |
| DDX52     | 17q12                  | 0. 105676564  | 0. 159162 | 0. 25129  |
| HNMT      | 2q22. 1                | 0. 105674471  | 0. 15917  | 0. 25129  |
| SMCO4     | 11q21                  | 0. 10562007   | 0. 159386 | 0. 251611 |
| XCL1      | 1q24. 2                | -0. 105569694 | 0. 159586 | 0. 251893 |
| PIK3IP1   | 22q12. 2               | 0. 105567761  | 0. 159594 | 0. 251893 |
| CCDC185   | 1q41                   | 0. 105565649  | 0. 159602 | 0. 251893 |
| COL6A1    | 21q22. 3               | 0. 105557299  | 0. 159636 | 0. 251925 |
| FBX024    | 7q22. 1                | 0. 105538468  | 0. 15971  | 0. 252024 |
| POLR3GL   | 1q21. 1                | 0. 105515452  | 0. 159802 | 0. 252135 |
| LOC729609 | Xp22. 12               | 0. 105514383  | 0. 159806 | 0. 252135 |
| FAM86B3P  | 8p23. 1                | 0. 105498713  | 0. 159869 | 0. 252214 |
| CD3D      | 11q23. 3               | -0. 10546942  | 0. 159985 | 0. 252378 |
| PSMD2     | 3q27. 1                | 0. 10544222   | 0. 160094 | 0. 252529 |
| ADGRD2    | 9q33. 3                | -0. 105398383 | 0. 160268 | 0. 252784 |
| EOGT      | 3p14. 1                | -0. 105383634 | 0. 160327 | 0. 252857 |
| HSCB      | 22q12. 1               | -0. 105379449 | 0. 160344 | 0. 252857 |
| CHCHD7    | 8q12. 1                | 0. 105377357  | 0. 160352 | 0. 252857 |
| GMNN      | 6p22. 3                | -0. 105331325 | 0. 160536 | 0. 253127 |
| PRSS16    | 6p22. 1                | 0. 105316678  | 0. 160595 | 0. 253199 |
| ZNF662    | 3p22. 1                | 0. 105276923  | 0. 160753 | 0. 253429 |
| TMCC3     | 12q22                  | -0. 105272739 | 0. 16077  | 0. 253436 |
| C6ORF203  | 6q21                   | -0. 105264369 | 0. 160804 | 0. 253449 |
| SOX18     | 20q13. 33              | -0. 105264369 | 0. 160804 | 0. 253449 |
| RINL      | 19q13. 2               | 0. 105258092  | 0. 160829 | 0. 253468 |
| PHOX2B    | 4p13                   | -0. 105252241 | 0. 160852 | 0. 253485 |
| HARBI1    | 11p11. 2               | 0. 105224614  | 0. 160963 | 0. 253639 |
| SP8       | 7p21. 1                | -0. 105186653 | 0. 161115 | 0. 253859 |
| UROS      | 10q26. 2               | 0. 10517649   | 0. 161155 | 0. 253903 |
| KPTN      | 19q13. 32              | 0. 105138828  | 0. 161306 | 0. 25412  |
| BUD13     | 11q23. 3               | 0. 105119997  | 0. 161382 | 0. 254219 |

|           |            |               |           |           |
|-----------|------------|---------------|-----------|-----------|
| VNN2      | 6q23. 2    | -0. 105090704 | 0. 161499 | 0. 254378 |
| WFS1      | 4p16. 1    | 0. 105088611  | 0. 161508 | 0. 254378 |
| CA4       | 17q23. 1   | -0. 105082056 | 0. 161534 | 0. 254399 |
| NFIX      | 19p13. 13  | -0. 10506978  | 0. 161583 | 0. 254454 |
| NBPF22P   | 5q14. 3    | 0. 105066962  | 0. 161594 | 0. 254454 |
| MZF1      | 19q13. 43  | 0. 105050949  | 0. 161659 | 0. 254535 |
| CYBC1     | 17q25. 3   | 0. 105027933  | 0. 161751 | 0. 254661 |
| RPSA      | 3p22. 1    | 0. 105017471  | 0. 161793 | 0. 2547   |
| CD3EAP    | 19q13. 32  | 0. 105015379  | 0. 161801 | 0. 2547   |
| GYS2      | 12p12. 1   | -0. 1049936   | 0. 161889 | 0. 254818 |
| RYR1      | 19q13. 2   | 0. 104990271  | 0. 161902 | 0. 254819 |
| SLC17A7   | 19q13. 33  | -0. 104981901 | 0. 161936 | 0. 254839 |
| GOLGA6B   | 15q24. 1   | 0. 104980738  | 0. 161941 | 0. 254839 |
| CTAGE11P  | 13q22. 2   | 0. 104931739  | 0. 162138 | 0. 255129 |
| DNAH17    | 17q25. 3   | 0. 104906576  | 0. 162239 | 0. 255268 |
| ACTR10    | 14q23. 1   | -0. 104900299 | 0. 162264 | 0. 255288 |
| PHB2      | 12p13. 31  | -0. 104858452 | 0. 162433 | 0. 255526 |
| SHOX2     | 3q25. 32   | 0. 10485636   | 0. 162441 | 0. 255526 |
| IFNGR1    | 6q23. 3    | -0. 104852175 | 0. 162458 | 0. 255532 |
| SSX5      | Xp11. 23   | -0. 104841107 | 0. 162503 | 0. 255582 |
| SLC25A14  | Xq26. 1    | -0. 104829159 | 0. 162551 | 0. 255638 |
| AHCTF1    | 1q44       | -0. 104814513 | 0. 16261  | 0. 255711 |
| ABHD3     | 18q11. 2   | 0. 104808236  | 0. 162635 | 0. 25573  |
| UGT2B28   | 4q13. 2    | -0. 104796518 | 0. 162682 | 0. 255785 |
| CWH43     | 4p11       | 0. 104788916  | 0. 162713 | 0. 255813 |
| GGA3      | 17q25. 1   | 0. 104774758  | 0. 16277  | 0. 255882 |
| HAND2-AS1 | 4q34. 1    | -0. 104761212 | 0. 162825 | 0. 255948 |
| SLC52A1   | 17p13. 2   | 0. 104756146  | 0. 162845 | 0. 25596  |
| UQCRBP1   | Xp11. 21   | -0. 10474965  | 0. 162872 | 0. 255981 |
| ST7       | 7q31. 2    | -0. 104737095 | 0. 162922 | 0. 256041 |
| CCDC144A  | 17p11. 2   | -0. 104718561 | 0. 162997 | 0. 256138 |
| GGPS1     | 1q42. 3    | 0. 104711987  | 0. 163024 | 0. 25616  |
| C22ORF24  | 22q12. 3   | -0. 104697549 | 0. 163082 | 0. 256209 |
| TUBGCP2   | 10q26. 3   | 0. 104697341  | 0. 163083 | 0. 256209 |
| OR5AN1    | 11q12. 1   | 0. 104694785  | 0. 163093 | 0. 256209 |
| JCHAIN    | 4q13. 3    | -0. 104663863 | 0. 163218 | 0. 256385 |
| GNA11     | 19p13. 3   | -0. 104628293 | 0. 163362 | 0. 256591 |
| TIMELESS  | 12q13. 3   | -0. 104622016 | 0. 163387 | 0. 25661  |
| PRSS3P2   | 7q34       | -0. 104607916 | 0. 163444 | 0. 25668  |
| ATOH7     | 10q21. 3 1 | -0. 1046      | 0. 163477 | 0. 25671  |
| VRTN      | 14q24. 3   | 0. 104583667  | 0. 163543 | 0. 256794 |
| TBC1D29P  | 17q11. 2   | 0. 104579853  | 0. 163558 | 0. 256798 |
| GLIS2     | 16p13. 3   | 0. 104573892  | 0. 163582 | 0. 256816 |
| P2RY11    | 19p13. 2   | 0. 104565522  | 0. 163616 | 0. 256849 |
| C2ORF16   | 2p23. 3    | 0. 104546691  | 0. 163692 | 0. 256948 |
| PMS2P2    | 7q11. 23   | 0. 104498567  | 0. 163888 | 0. 257224 |
| MLLT11    | 1q21. 3    | -0. 104494382 | 0. 163904 | 0. 257224 |
| BLID      | 11q24. 1   | 0. 104493779  | 0. 163907 | 0. 257224 |
| AARS2     | 6p21. 1    | -0. 104488105 | 0. 16393  | 0. 25724  |
| RASSF1    | 3p21. 31   | 0. 104444165  | 0. 164108 | 0. 257466 |
| IQCF2     | 3p21. 2    | 0. 10444      | 0. 164125 | 0. 257466 |
| OR5D16    | 11q12. 1   | -0. 10444     | 0. 164125 | 0. 257466 |
| OR6C68    | 12q13. 2   | 0. 10444      | 0. 164125 | 0. 257466 |
| CHST11    | 12q23. 3   | 0. 104435796  | 0. 164142 | 0. 257472 |

|           |          |              |          |          |
|-----------|----------|--------------|----------|----------|
| ZNF283    | 19q13.31 | -0.104425389 | 0.164185 | 0.257518 |
| DGCR8     | 22q11.21 | -0.10441278  | 0.164236 | 0.257578 |
| COX14     | 12q13.12 | -0.104406503 | 0.164261 | 0.257598 |
| C10ORF12  | 10q24.1  | 0.104400226  | 0.164287 | 0.257606 |
| FM06P     | 1q24.3   | -0.104398856 | 0.164292 | 0.257606 |
| SDCCAG8   | 1q43-q44 | 0.104389764  | 0.164329 | 0.257644 |
| TRPM2     | 21q22.3  | -0.104381395 | 0.164363 | 0.257676 |
| DPF1      | 19q13.2  | -0.104378357 | 0.164376 | 0.257676 |
| TMEM11    | 17p11.2  | -0.104360471 | 0.164448 | 0.25777  |
| TTC4      | 1p32.3   | 0.104310255  | 0.164653 | 0.25807  |
| HPGDS     | 4q22.3   | 0.104295608  | 0.164712 | 0.258137 |
| NCKIPSD   | 3p21.31  | 0.104293516  | 0.164721 | 0.258137 |
| FBLN2     | 3p25.1   | -0.104268408 | 0.164823 | 0.258276 |
| ARTN      | 1p34.1   | 0.104260038  | 0.164857 | 0.25831  |
| SHC1      | 1q21.3   | 0.104255853  | 0.164874 | 0.258316 |
| MRPL43    | 10q24.31 | 0.104249576  | 0.1649   | 0.258336 |
| GHRHR     | 7p14.3   | 0.104233944  | 0.164963 | 0.258415 |
| MAT1A     | 10q22.3  | -0.104148642 | 0.165311 | 0.25894  |
| TRIM3     | 11p15.4  | -0.104134497 | 0.165369 | 0.25901  |
| C11ORF74  | 11p12    | 0.104130312  | 0.165386 | 0.259017 |
| ZNF460    | 19q13.43 | -0.104111481 | 0.165463 | 0.259117 |
| POLG      | 15q26.1  | 0.104105204  | 0.165489 | 0.259137 |
| IFNL1     | 19q13.2  | 0.104099871  | 0.16551  | 0.259151 |
| TBC1D17   | 19q13.33 | 0.10409265   | 0.16554  | 0.25917  |
| ABLIM2    | 4p16.1   | -0.104090557 | 0.165549 | 0.25917  |
| CHKB-CPT1 | 22q13.33 | 0.104082188  | 0.165583 | 0.259203 |
| RPH3A     | 12q24.13 | -0.104066698 | 0.165646 | 0.259282 |
| RUSC2     | 9p13.3   | -0.104063357 | 0.16566  | 0.259283 |
| GOLGA6L9  | 15q25.2  | 0.104025694  | 0.165814 | 0.259476 |
| SNAI3     | 16q24.2  | -0.104023602 | 0.165822 | 0.259476 |
| STC1      | 8p21.2   | -0.104023602 | 0.165822 | 0.259476 |
| TTC29     | 4q31.22  | -0.1040196   | 0.165839 | 0.259482 |
| RD3       | 1q32.3   | -0.103975829 | 0.166018 | 0.259742 |
| IQCF3     | 3p21.2   | 0.103963685  | 0.166068 | 0.259799 |
| ACTR3C    | 7q36.1   | -0.103946185 | 0.166139 | 0.259891 |
| EEF1AKMT2 | 10q26.13 | -0.103937815 | 0.166174 | 0.259892 |
| FAM106A   | 17p11.2  | -0.103936712 | 0.166178 | 0.259892 |
| UGT3A1    | 5p13.2   | -0.103936448 | 0.166179 | 0.259892 |
| DDX10     | 11q22.3  | 0.103929446  | 0.166208 | 0.259917 |
| HYMAI     | 6q24.2   | -0.103912571 | 0.166277 | 0.260005 |
| CKMT2     | 5q14.1   | 0.103902245  | 0.166319 | 0.26005  |
| C11ORF52  | 11q23.1  | 0.103891783  | 0.166362 | 0.260097 |
| CYB561D2  | 3p21.31  | -0.103885506 | 0.166388 | 0.260117 |
| COA1      | 7p13     | -0.103875044 | 0.166431 | 0.260164 |
| NUBP2     | 16p13.3  | 0.103845751  | 0.166551 | 0.260331 |
| MT1A      | 16q13    | -0.103808089 | 0.166706 | 0.260553 |
| CT45A1    | Xq26.3   | -0.103801888 | 0.166731 | 0.260572 |
| TPP2      | 13q33.1  | -0.10379135  | 0.166775 | 0.260619 |
| TYW5      | 2q33.1   | 0.103757872  | 0.166912 | 0.260814 |
| CCDC60    | 12q24.23 | -0.103723425 | 0.167054 | 0.260975 |
| OR7E5P    | 11q12.1  | -0.103722463 | 0.167058 | 0.260975 |
| PRAMEF11  | 1p36.21  | -0.103721881 | 0.16706  | 0.260975 |
| PUS3      | 11q24.2  | -0.10372021  | 0.167067 | 0.260975 |
| ZNF169    | 9q22.32  | 0.10368464   | 0.167213 | 0.261182 |

|           |           |              |          |          |
|-----------|-----------|--------------|----------|----------|
| UROC1     | 3q21.3    | -0.103680922 | 0.167229 | 0.261182 |
| NDUFB11   | Xp11.3    | 0.103678363  | 0.167239 | 0.261182 |
| FAT2      | 5q33.1    | 0.103669994  | 0.167274 | 0.261189 |
| HMBOX1    | 8p21.1-p1 | -0.103669994 | 0.167274 | 0.261189 |
| KCNK4     | 11q13.1   | 0.103667796  | 0.167283 | 0.261189 |
| GFPT2     | 5q35.3    | -0.103623962 | 0.167463 | 0.261451 |
| PES1      | 22q12.2   | 0.103619777  | 0.167481 | 0.261457 |
| CD38      | 4p15.32   | -0.103607223 | 0.167532 | 0.261517 |
| NCF1B     | 7q11.23   | -0.103598853 | 0.167567 | 0.261551 |
| HSPA14    | 10p13     | -0.103500513 | 0.167973 | 0.262164 |
| PCDHB19P  | 5q31.3    | -0.10349429  | 0.167998 | 0.262184 |
| ZBTB47    | 3p22.1    | -0.103464943 | 0.16812  | 0.262352 |
| TEX9      | 15q21.3   | -0.103414726 | 0.168327 | 0.262656 |
| HADHB     | 2p23.3    | -0.103372879 | 0.168501 | 0.262906 |
| IDI2      | 10p15.3   | -0.103360325 | 0.168553 | 0.262966 |
| RALYL     | 8q21.2    | -0.103334759 | 0.168659 | 0.263111 |
| TTY7      | Yp11.2    | 0.103331478  | 0.168672 | 0.263112 |
| CCN3      | 8q24.12   | -0.103266169 | 0.168943 | 0.263513 |
| ERICH6    | 3q25.1    | -0.103248922 | 0.169014 | 0.263605 |
| DNM1P46   | 15q26.3   | -0.103234999 | 0.169072 | 0.263674 |
| UPK1A     | 19q13.12  | 0.103231065  | 0.169089 | 0.263679 |
| DNAH8     | 6p21.2    | -0.103225742 | 0.169111 | 0.263693 |
| ESM1      | 5q11.2    | 0.103218044  | 0.169143 | 0.263722 |
| FAM223B   | Xq28      | 0.103212868  | 0.169164 | 0.263735 |
| RRP7BP    | 22q13.2   | 0.103195029  | 0.169238 | 0.26383  |
| SNORA47   | 5q13.3    | -0.103179906 | 0.169301 | 0.263907 |
| LOC399815 | 10q26.13  | 0.103128181  | 0.169516 | 0.264211 |
| UGT1A3    | 2q37.1    | 0.103126641  | 0.169522 | 0.264211 |
| MMAA      | 4q31.21   | 0.103119704  | 0.169551 | 0.264236 |
| AP1G1     | 16q22.2   | -0.103109242 | 0.169595 | 0.264283 |
| EEF1G     | 11q12.3   | 0.103102965  | 0.169621 | 0.264303 |
| TMEM150A  | 2p11.2    | 0.103094595  | 0.169656 | 0.264337 |
| MGC16025  | 2q37.3    | -0.103084086 | 0.1697   | 0.264384 |
| ACCS      | 11p11.2   | 0.103077857  | 0.169725 | 0.264393 |
| IGF2-AS   | 11p15.5   | 0.103076303  | 0.169732 | 0.264393 |
| FRY       | 13q13.1   | -0.103052748 | 0.16983  | 0.264526 |
| MAU2      | 19p13.11  | -0.103044379 | 0.169865 | 0.264559 |
| ASAH2B    | 10q11.23  | -0.103012713 | 0.169997 | 0.264744 |
| SETD3     | 14q32.2   | 0.103004624  | 0.170031 | 0.264763 |
| PRTN3     | 19p13.3   | 0.10300349   | 0.170035 | 0.264763 |
| ZNF679    | 7q11.21   | 0.102989445  | 0.170094 | 0.264813 |
| ZNF735    | 7q11.21   | -0.102989445 | 0.170094 | 0.264813 |
| MKX       | 10p12.1   | -0.102964923 | 0.170196 | 0.264951 |
| EDC3      | 15q24.1   | -0.102950223 | 0.170257 | 0.265017 |
| LGALS9B   | 17p11.2   | 0.10294841   | 0.170265 | 0.265017 |
| PDX1      | 13q12.2   | -0.102933484 | 0.170327 | 0.265094 |
| PER1      | 17p13.1   | -0.102910468 | 0.170423 | 0.265222 |
| CARD16    | 11q22.3   | 0.102895822  | 0.170485 | 0.265297 |
| TBR1      | 2q24.2    | -0.102880836 | 0.170547 | 0.265374 |
| GALNT17   | 7q11.22   | -0.102837236 | 0.170729 | 0.265637 |
| DDN       | 12q13.12  | -0.102825997 | 0.170776 | 0.265689 |
| CD40      | 20q13.12  | 0.102810035  | 0.170843 | 0.265772 |
| ZNF234    | 19q13.31  | -0.102801666 | 0.170878 | 0.265806 |
| AKT1S1    | 19q13.33  | 0.102789165  | 0.17093  | 0.265867 |

|          |          |              |          |          |
|----------|----------|--------------|----------|----------|
| NUDT4    | 12q22    | -0.10274308  | 0.171123 | 0.266146 |
| FAM45BP  | Xq26.1   | -0.102736802 | 0.17115  | 0.266166 |
| PPP2R5D  | 6p21.1   | -0.102726341 | 0.171193 | 0.266214 |
| ENY2     | 8q23.1   | 0.102720064  | 0.17122  | 0.266234 |
| MMP25    | 16p13.3  | -0.102715879 | 0.171237 | 0.26624  |
| VPS29    | 12q24.11 | 0.102707509  | 0.171272 | 0.266274 |
| C21ORF62 | 21q22.11 | -0.102684708 | 0.171368 | 0.266402 |
| TMEM14EP | 3q25.2   | -0.102596737 | 0.171737 | 0.266955 |
| SLC46A3  | 13q12.3  | -0.102558952 | 0.171896 | 0.267181 |
| MKRN2    | 3p25.2   | -0.102525474 | 0.172037 | 0.267379 |
| CCDC25   | 8p21.1   | -0.102506643 | 0.172116 | 0.267481 |
| DNASE2   | 19p13.13 | 0.102500366  | 0.172142 | 0.267502 |
| URB1-AS1 | 21q22.11 | 0.102496181  | 0.17216  | 0.267508 |
| PDE6A    | 5q32     | 0.102446501  | 0.172369 | 0.267812 |
| ZC3H4    | 19q13.32 | -0.102422949 | 0.172468 | 0.267946 |
| DSC2     | 18q12.1  | 0.102393656  | 0.172592 | 0.268094 |
| METTL2B  | 7q32.1   | -0.102391564 | 0.1726   | 0.268094 |
| OR5B21   | 11q12.1  | -0.102390775 | 0.172604 | 0.268094 |
| GDNF     | 5p13.2   | -0.102385892 | 0.172624 | 0.268105 |
| SLC39A3  | 19p13.3  | 0.102366455  | 0.172706 | 0.268211 |
| KRT86    | 12q13.13 | 0.102347678  | 0.172785 | 0.268313 |
| ZBED1    | Xp22.33  | -0.102318331 | 0.172909 | 0.268485 |
| SLTM     | 15q22.1  | -0.102307869 | 0.172953 | 0.268533 |
| ZNF836   | 19q13.41 | -0.102299553 | 0.172988 | 0.268559 |
| PSMC2    | 7q22.1   | 0.102297408  | 0.172998 | 0.268559 |
| PRR16    | 5q23.1   | -0.102278576 | 0.173077 | 0.268662 |
| BICC1    | 10q21.1  | -0.102266022 | 0.17313  | 0.268723 |
| OR52K1   | 11p15.4  | 0.102254673  | 0.173178 | 0.268758 |
| IGF2BP1  | 17q21.32 | 0.102254371  | 0.173179 | 0.268758 |
| MCTS2P   | 20q11.21 | -0.102248772 | 0.173203 | 0.268763 |
| FANCB    | Xp22.2   | 0.102247191  | 0.17321  | 0.268763 |
| SALL1    | 16q12.1  | -0.102224229 | 0.173307 | 0.268873 |
| MRPL38   | 17q25.1  | 0.102224175  | 0.173307 | 0.268873 |
| SMYD1    | 2p11.2   | -0.102210986 | 0.173363 | 0.268938 |
| LRRC30   | 18p11.23 | -0.102202411 | 0.173399 | 0.268974 |
| ARHGEF25 | 12q13.3  | -0.102196974 | 0.173422 | 0.268988 |
| MAP10    | 1q42.2   | -0.10215722  | 0.17359  | 0.269228 |
| FBXO45   | 3q29     | -0.102142573 | 0.173652 | 0.269297 |
| LRPAP1   | 4p16.3   | -0.102140481 | 0.173661 | 0.269297 |
| ATOX1    | 5q33.1   | 0.102130019  | 0.173705 | 0.269344 |
| FAM156A  | Xp11.22  | 0.102111188  | 0.173785 | 0.269447 |
| TFAP2C   | 20q13.31 | 0.102092357  | 0.173865 | 0.269529 |
| URI1     | 19q12    | -0.102092357 | 0.173865 | 0.269529 |
| CEP192   | 18p11.21 | -0.102004531 | 0.174237 | 0.270086 |
| KIAA1211 | 4q12     | 0.101991924  | 0.174291 | 0.270133 |
| CPSF1    | 8q24.3   | 0.101989831  | 0.1743   | 0.270133 |
| RIPK2    | 8q21.3   | 0.101987739  | 0.174309 | 0.270133 |
| FNDC9    | 5q33.3   | -0.101960949 | 0.174422 | 0.270289 |
| HIST1H1E | 6p22.2   | 0.101941974  | 0.174503 | 0.270393 |
| RTL4     | Xq23     | -0.101933888 | 0.174537 | 0.270425 |
| CNIH2    | 11q13.2  | -0.101904045 | 0.174664 | 0.2706   |
| MAP3K13  | 3q27.2   | 0.101881029  | 0.174762 | 0.270731 |
| CSNK1A1L | 13q13.3  | -0.10187532  | 0.174787 | 0.270748 |
| NEDD4L   | 18q21.31 | -0.101868474 | 0.174816 | 0.270772 |

|            |           |               |           |           |
|------------|-----------|---------------|-----------|-----------|
| LRRC23     | 12p13. 31 | 0. 101862197  | 0. 174842 | 0. 270792 |
| ADRA1D     | 20p13     | -0. 101856187 | 0. 174868 | 0. 270811 |
| SRARP      | 1p36. 13  | -0. 101853018 | 0. 174881 | 0. 270811 |
| KCNIP4-IT1 | 4p15. 2   | -0. 101834653 | 0. 17496  | 0. 270911 |
| NAGPA      | 16p13. 3  | 0. 101811981  | 0. 175056 | 0. 271039 |
| PLEKHH2    | 2p21      | 0. 101791057  | 0. 175145 | 0. 271128 |
| GAB4       | 22q11. 1  | -0. 101789588 | 0. 175152 | 0. 271128 |
| SPACA6     | 19q13. 41 | 0. 101788965  | 0. 175154 | 0. 271128 |
| COPRS      | 17q11. 2  | -0. 101765949 | 0. 175252 | 0. 271259 |
| HIST1H2BF  | 6p22. 2   | 0. 101746926  | 0. 175333 | 0. 271364 |
| SERPINA1E  | 14q32. 13 | -0. 101718509 | 0. 175455 | 0. 271493 |
| AIG1       | 6q24. 2   | -0. 101717825 | 0. 175458 | 0. 271493 |
| HDAC8      | Xq13. 1   | 0. 101717825  | 0. 175458 | 0. 271493 |
| SLC25A3    | 12q23. 1  | -0. 101692717 | 0. 175565 | 0. 271637 |
| CEMIP2     | 9q21. 13  | -0. 101675978 | 0. 175636 | 0. 271727 |
| VWA1       | 1p36. 33  | 0. 101667608  | 0. 175672 | 0. 271747 |
| LSM5       | 7p14. 3   | 0. 101665516  | 0. 175681 | 0. 271747 |
| CAPN3      | 15q15. 1  | 0. 101663424  | 0. 17569  | 0. 271747 |
| GOLGA2P5   | 12q23. 1  | -0. 101650869 | 0. 175743 | 0. 271809 |
| PRM2       | 16p13. 13 | 0. 101641265  | 0. 175784 | 0. 271851 |
| RND3       | 2q23. 3   | 0. 101560898  | 0. 176128 | 0. 272361 |
| MICAL3     | 22q11. 21 | -0. 101552529 | 0. 176164 | 0. 272396 |
| KLHL33     | 14q11. 2  | -0. 101542022 | 0. 176209 | 0. 272423 |
| GOLGA2P3Y  | Yq11. 23  | 0. 101538889  | 0. 176222 | 0. 272423 |
| GSC2       | 22q11. 21 | -0. 101538889 | 0. 176222 | 0. 272423 |
| SLC30A6    | 2p22. 3   | -0. 10152742  | 0. 176271 | 0. 272478 |
| CEBPA-DT   | 19q13. 11 | 0. 101510681  | 0. 176343 | 0. 272567 |
| SLC34A2    | 4p15. 2   | 0. 101500432  | 0. 176387 | 0. 272614 |
| LLGL1      | 17p11. 2  | -0. 101495042 | 0. 17641  | 0. 272629 |
| YTHDF2     | 1p35. 3   | -0. 101485573 | 0. 176451 | 0. 27267  |
| BNIP5      | 6p21. 31  | 0. 101460677  | 0. 176557 | 0. 272814 |
| FBXL19-AS1 | 16p11. 2  | 0. 101452149  | 0. 176594 | 0. 272849 |
| C12ORF77   | 12p12. 1  | -0. 101441339 | 0. 17664  | 0. 2729   |
| CD1B       | 1q23. 1   | -0. 101417246 | 0. 176744 | 0. 273039 |
| ARHGAP30   | 1q23. 3   | -0. 101376771 | 0. 176917 | 0. 273286 |
| PIP        | 7q34      | 0. 101364674  | 0. 176969 | 0. 273345 |
| RPL27      | 17q21. 31 | 0. 101355847  | 0. 177007 | 0. 273382 |
| DYRK4      | 12p13. 32 | -0. 101334924 | 0. 177097 | 0. 2735   |
| WDFY1      | 2q36. 1   | 0. 101330739  | 0. 177115 | 0. 273507 |
| LINC0023E  | 16p13. 3  | -0. 10131653  | 0. 177176 | 0. 27358  |
| C2ORF27B   | 2q21. 2   | -0. 101311451 | 0. 177198 | 0. 273592 |
| ADH4       | 4q23      | -0. 101307763 | 0. 177214 | 0. 273596 |
| AMELX      | Xp22. 2   | 0. 101301027  | 0. 177243 | 0. 273619 |
| TPST2      | 22q12. 1  | -0. 101295169 | 0. 177268 | 0. 273637 |
| OR2L1P     | 1q44      | -0. 101248961 | 0. 177466 | 0. 273923 |
| CCAR2      | 8p21. 3   | 0. 101226121  | 0. 177565 | 0. 274053 |
| PRB4       | 12p13. 2  | 0. 101215012  | 0. 177613 | 0. 274106 |
| DENND6A    | 3p14. 3   | 0. 101211474  | 0. 177628 | 0. 274108 |
| KLK5       | 19q13. 41 | 0. 101206537  | 0. 177649 | 0. 27412  |
| SPOPL      | 2q22. 1   | -0. 101165443 | 0. 177826 | 0. 274372 |
| GPHA2      | 11q13. 1  | -0. 101146141 | 0. 177909 | 0. 274479 |
| CRHR1      | 17q21. 31 | -0. 101125368 | 0. 177999 | 0. 274596 |
| PPCS       | 1p34. 2   | 0. 101071287  | 0. 178232 | 0. 274935 |
| RAB3A      | 19p13. 11 | -0. 101060825 | 0. 178277 | 0. 274983 |



|           |            |               |           |           |
|-----------|------------|---------------|-----------|-----------|
| CCDC86    | 11q12. 2   | 0. 101023162  | 0. 17844  | 0. 275213 |
| KCNJ15    | 21q22. 13- | 0. 101006424  | 0. 178512 | 0. 275303 |
| HMOX1     | 22q12. 3   | -0. 100975038 | 0. 178648 | 0. 275491 |
| SLC35G3   | 17q12      | -0. 100968138 | 0. 178678 | 0. 275516 |
| UPF2      | 10p14      | -0. 100943653 | 0. 178784 | 0. 275658 |
| FAM126B   | 2q33. 1    | 0. 100935283  | 0. 17882  | 0. 275692 |
| GPR61     | 1p13. 3    | -0. 100927948 | 0. 178852 | 0. 27572  |
| ITIH3     | 3p21. 1    | 0. 100922729  | 0. 178874 | 0. 275733 |
| PYROXD1   | 12p12. 1   | -0. 100889252 | 0. 179019 | 0. 275936 |
| NSG1      | 4p16. 3    | -0. 10087042  | 0. 179101 | 0. 27604  |
| PHTF1     | 1p13. 2    | -0. 100866236 | 0. 179119 | 0. 276047 |
| RMC1      | 18q11. 2   | 0. 100857866  | 0. 179155 | 0. 276081 |
| VSX1      | 20p11. 21  | -0. 100834238 | 0. 179258 | 0. 276218 |
| PHOSPHO2  | 2q31. 1    | -0. 100828573 | 0. 179282 | 0. 276222 |
| SECTM1    | 17q25. 3   | 0. 100822296  | 0. 179309 | 0. 276222 |
| FNBP4     | 11p11. 2   | 0. 100820204  | 0. 179318 | 0. 276222 |
| TRPS1     | 8q23. 3    | -0. 100818111 | 0. 179327 | 0. 276222 |
| HES5      | 1p36. 32   | 0. 100817669  | 0. 179329 | 0. 276222 |
| TTPA      | 8q12. 3    | -0. 100803798 | 0. 17939  | 0. 276293 |
| TNP1      | 2q35       | -0. 100787434 | 0. 179461 | 0. 276381 |
| PRODH     | 22q11. 21  | 0. 100778357  | 0. 1795   | 0. 276421 |
| GSTA3     | 6p12. 2    | -0. 100759492 | 0. 179582 | 0. 276526 |
| RERGL     | 12p12. 3   | -0. 100731091 | 0. 179705 | 0. 276694 |
| VPS52     | 6p21. 32   | 0. 100717678  | 0. 179763 | 0. 276762 |
| DDIAS     | 11q14. 1   | 0. 100684201  | 0. 179909 | 0. 27695  |
| SILC1     | 2p25. 2    | -0. 100683234 | 0. 179913 | 0. 27695  |
| LCORL     | 4p15. 31   | -0. 100669554 | 0. 179972 | 0. 27702  |
| USP37     | 2q35       | -0. 100636076 | 0. 180118 | 0. 277216 |
| MUC6      | 11p15. 5   | 0. 100633984  | 0. 180127 | 0. 277216 |
| LAMA4     | 6q21       | -0. 100623522 | 0. 180173 | 0. 277264 |
| ARHGAP36  | Xq26. 1    | -0. 100609743 | 0. 180233 | 0. 277335 |
| PRR25     | 16p13. 3   | 0. 100590958  | 0. 180314 | 0. 27744  |
| TCEAL7    | Xq22. 2    | -0. 100583767 | 0. 180346 | 0. 277467 |
| YY1       | 14q32. 2   | 0. 10057749   | 0. 180373 | 0. 277487 |
| CYP7A1    | 8q12. 1    | -0. 100484148 | 0. 18078  | 0. 278092 |
| NEK5      | 13q14. 3   | -0. 100466269 | 0. 180858 | 0. 278173 |
| SLC9A5    | 16q22. 1   | 0. 100464503  | 0. 180866 | 0. 278173 |
| MEA1      | 6p21. 1    | 0. 100462411  | 0. 180875 | 0. 278173 |
| TRPV5     | 7q34       | -0. 100447498 | 0. 18094  | 0. 278252 |
| AVL9      | 7p14. 3    | 0. 10044358   | 0. 180957 | 0. 278257 |
| ALKBH8    | 11q22. 3   | -0. 100424748 | 0. 181039 | 0. 278362 |
| KLHL10    | 17q21. 2   | -0. 100392446 | 0. 18118  | 0. 278558 |
| ATP13A4   | 3q29       | -0. 100387138 | 0. 181203 | 0. 278572 |
| LRRC14B   | 5p15. 33   | -0. 100371478 | 0. 181272 | 0. 278656 |
| CEP131    | 17q25. 3   | 0. 100368255  | 0. 181286 | 0. 278656 |
| DDX59     | 1q32. 1    | -0. 100343146 | 0. 181396 | 0. 278803 |
| MLNR      | 13q14. 2   | -0. 100307986 | 0. 181549 | 0. 279018 |
| GSTT4     | 22q11. 23  | 0. 100299151  | 0. 181588 | 0. 279048 |
| C14ORF93  | 14q11. 2   | -0. 100297115 | 0. 181597 | 0. 279048 |
| CLEC3A    | 16q23. 1   | -0. 100293252 | 0. 181614 | 0. 279053 |
| ACSBG2    | 19p13. 3   | -0. 100280273 | 0. 181671 | 0. 279119 |
| CCDC42    | 17p13. 1   | -0. 10024523  | 0. 181824 | 0. 279333 |
| WWP2      | 16q22. 1   | 0. 100240621  | 0. 181844 | 0. 279341 |
| LINC00598 | 13q14. 11  | -0. 100237573 | 0. 181858 | 0. 279341 |

|           |           |              |          |          |
|-----------|-----------|--------------|----------|----------|
| RAB3D     | 19p13.2   | -0.100223882 | 0.181918 | 0.279412 |
| ABCC6     | 16p13.11  | -0.100219697 | 0.181936 | 0.279419 |
| PANX1     | 11q21     | 0.100215513  | 0.181954 | 0.279425 |
| CSNK1E    | 22q13.1   | 0.100209236  | 0.181982 | 0.279446 |
| OR13A1    | 10q11.21  | -0.100198516 | 0.182029 | 0.279497 |
| NKPD1     | 19q13.32  | 0.100194642  | 0.182046 | 0.279502 |
| NEIL3     | 4q34.3    | 0.100184127  | 0.182092 | 0.279543 |
| IMPDH2    | 3p21.31   | 0.100182035  | 0.182101 | 0.279543 |
| TMPRSS11E | 4q13.2    | 0.100171787  | 0.182146 | 0.279591 |
| HIST2H2BA | 1p11.2    | 0.100162315  | 0.182188 | 0.279633 |
| BANK1     | 4q24      | 0.100144373  | 0.182266 | 0.279733 |
| OR51G2    | 11p15.4   | -0.100088334 | 0.182512 | 0.280089 |
| AKT2      | 19q13.2   | 0.100050217  | 0.18268  | 0.280324 |
| PPA2      | 4q24      | 0.100039755  | 0.182726 | 0.280373 |
| ADAMTS17  | 15q26.3   | -0.100027201 | 0.182781 | 0.280436 |
| SUZ12P1   | 17q11.2   | 0.099986452  | 0.18296  | 0.28069  |
| AADACL3   | 1p36.21   | -0.099968827 | 0.183038 | 0.280787 |
| C2ORF15   | 2q11.2    | -0.099949783 | 0.183122 | 0.280894 |
| HACL1     | 3p25.1    | -0.099941414 | 0.183159 | 0.280929 |
| ATXN7L2   | 1p13.3    | -0.099912121 | 0.183288 | 0.281106 |
| PTDSS1    | 8q22.1    | -0.099899567 | 0.183343 | 0.281169 |
| BIRC8     | 19q13.42  | 0.099858085  | 0.183526 | 0.281428 |
| PAQR8     | 6p12.2    | 0.099836796  | 0.18362  | 0.28155  |
| NOTO      | 2p13.2    | -0.099812491 | 0.183727 | 0.281693 |
| RABGGTA   | 14q12     | 0.099784487  | 0.183851 | 0.281861 |
| CPA2      | 7q32.2    | -0.099774194 | 0.183896 | 0.281897 |
| MIMT1     | 19q13.43  | -0.099772783 | 0.183902 | 0.281897 |
| NKX6-2    | 10q26.3   | 0.099742736  | 0.184035 | 0.282079 |
| ADPGK     | 15q24.1   | 0.099725901  | 0.184109 | 0.282171 |
| EIF3C     | 16p11.2   | 0.099710405  | 0.184178 | 0.282255 |
| CLEC4A    | 12p13.31  | -0.099704978 | 0.184202 | 0.28227  |
| SMO       | 7q32.1    | -0.099694516 | 0.184248 | 0.282319 |
| TTY9B     | Yq11.222  | -0.099675428 | 0.184333 | 0.282427 |
| SPINT3    | 20q13.12  | 0.099634288  | 0.184515 | 0.282684 |
| CASC10    | 10p12.31  | -0.099615006 | 0.1846   | 0.282793 |
| CNGA1     | 4p12      | 0.099596175  | 0.184684 | 0.282899 |
| NCEH1     | 3q26.31   | 0.09959199   | 0.184702 | 0.282906 |
| TTY8      | Yp11.2    | -0.099570639 | 0.184797 | 0.283026 |
| DDIT4L    | 4q24      | 0.09956798   | 0.184809 | 0.283026 |
| PPP1R12C  | 19q13.42  | 0.099562697  | 0.184832 | 0.28304  |
| VPS35L    | 16p12.3   | -0.09955642  | 0.18486  | 0.283061 |
| FOXL2     | 3q22.3    | 0.099550721  | 0.184885 | 0.283078 |
| KRT72     | 12q13.13  | -0.099538874 | 0.184938 | 0.283137 |
| C3ORF67   | 3p14.2    | -0.099531312 | 0.184971 | 0.283166 |
| FAM136BP  | 6p25.2    | 0.099516694  | 0.185036 | 0.283244 |
| FAM71F2   | 7q32.1    | -0.099508296 | 0.185073 | 0.283279 |
| SUPT20HL2 | Xp22.11   | -0.099484749 | 0.185178 | 0.283418 |
| NUPR2     | 7p11.2    | -0.099448353 | 0.185339 | 0.283643 |
| YY2       | Xp22.12   | -0.099444583 | 0.185356 | 0.283647 |
| SEH1L     | 18p11.21  | -0.099430879 | 0.185417 | 0.283719 |
| ALYREF    | 17q25.3   | 0.099380662  | 0.18564  | 0.284038 |
| VRK3      | 19q13.33  | 0.099349277  | 0.18578  | 0.28423  |
| EGFLAM    | 5p13.2-p1 | -0.099336723 | 0.185836 | 0.284294 |
| CCDC140   | 2q36.1    | 0.099323213  | 0.185896 | 0.284364 |

|           |           |              |          |          |
|-----------|-----------|--------------|----------|----------|
| MT1M      | 16q13     | -0.099309522 | 0.185957 | 0.284421 |
| ZNF233    | 19q13.31  | -0.099308528 | 0.185961 | 0.284421 |
| MAPK8IP3  | 16p13.3   | 0.099261398  | 0.186171 | 0.28472  |
| C18ORF54  | 18q21.2   | -0.099238382 | 0.186274 | 0.284855 |
| IK        | 5q31.3    | 0.09922792   | 0.186321 | 0.284905 |
| OR2T8     | 1q44      | -0.09921915  | 0.18636  | 0.284943 |
| STEAP2    | 7q21.13   | 0.099209089  | 0.186405 | 0.28499  |
| TMEM248   | 7q11.21   | 0.09919235   | 0.186479 | 0.285082 |
| OR10G3    | 14q11.2   | -0.099185688 | 0.186509 | 0.285106 |
| HIST1H1T  | 6p22.2    | 0.099158003  | 0.186633 | 0.285259 |
| SLC17A5   | 6q13      | -0.09915678  | 0.186638 | 0.285259 |
| MFRP      | 11q23.3   | 0.099146318  | 0.186685 | 0.285309 |
| CMTM8     | 3p22.3    | -0.099125395 | 0.186778 | 0.285408 |
| DNAJB12   | 10q22.1   | 0.099125395  | 0.186778 | 0.285408 |
| CFAP100   | 3q21.3    | -0.099074515 | 0.187006 | 0.285714 |
| GSDME     | 7p15.3    | 0.099073086  | 0.187012 | 0.285714 |
| MZT1      | 13q21.33  | 0.099070994  | 0.187021 | 0.285714 |
| PSG6      | 19q13.31  | 0.099058242  | 0.187078 | 0.285779 |
| SCARNA1   | 1p35.3    | -0.099043573 | 0.187144 | 0.285858 |
| ENTPD6    | 20p11.21  | 0.099018685  | 0.187255 | 0.286006 |
| ZIC1      | 3q24      | 0.099012918  | 0.187281 | 0.286024 |
| NKAPD1    | 11q23.1   | -0.099004038 | 0.187321 | 0.286062 |
| OR2L3     | 1q44      | -0.098998056 | 0.187348 | 0.286081 |
| VSNL1     | 2p24.2    | 0.098966376  | 0.18749  | 0.286276 |
| CSNK1G3   | 5q23.2    | -0.098945452 | 0.187583 | 0.286398 |
| GPR82     | Xp11.4    | -0.098928765 | 0.187658 | 0.286483 |
| DGCR6     | 22q11.21  | -0.098926621 | 0.187668 | 0.286483 |
| OBP2B     | 9q34.2    | 0.098901971  | 0.187778 | 0.286629 |
| DNAJC22   | 12q13.12  | 0.098884774  | 0.187856 | 0.286725 |
| PCGF3     | 4p16.3    | 0.098878497  | 0.187884 | 0.286746 |
| DOCK1     | 10q26.2   | -0.09886385  | 0.187949 | 0.286825 |
| FAM86FP   | 12p13.31  | 0.098855481  | 0.187987 | 0.28686  |
| BRI3BP    | 12q24.31  | -0.098738309 | 0.188513 | 0.287642 |
| TMEM61    | 1p32.3    | -0.09872157  | 0.188589 | 0.287735 |
| ART3      | 4q21.1 4t | -0.098711702 | 0.188633 | 0.28778  |
| POM121L9F | 22q11.23  | -0.098692277 | 0.188721 | 0.287892 |
| SPATA3    | 2q37.1    | -0.098687185 | 0.188744 | 0.287905 |
| ABR       | 17p13.3   | -0.098673446 | 0.188805 | 0.287977 |
| ABCB8     | 7q36.1    | 0.09865043   | 0.188909 | 0.288113 |
| CDH22     | 20q13.12  | -0.09860725  | 0.189104 | 0.288388 |
| CBX8      | 17q25.3   | 0.098598121  | 0.189145 | 0.288429 |
| SLC15A3   | 11q12.2   | 0.098591844  | 0.189173 | 0.28845  |
| MORC4     | Xq22.3    | -0.098562551 | 0.189305 | 0.288629 |
| NXF4      | Xq22.1    | -0.098551207 | 0.189356 | 0.288685 |
| MCCD1     | 6p21.33   | -0.098527341 | 0.189464 | 0.288811 |
| KRTAP10-1 | 21q22.3   | -0.098526581 | 0.189468 | 0.288811 |
| AURKC     | 19q13.43  | 0.098496693  | 0.189603 | 0.288987 |
| PLIN5     | 19p13.3   | 0.098491411  | 0.189626 | 0.288987 |
| STK11IP   | 2q35      | 0.098491411  | 0.189626 | 0.288987 |
| TAAR5     | 6q23.2    | -0.098479248 | 0.189681 | 0.289049 |
| IQCH      | 15q23     | -0.098470487 | 0.189721 | 0.289087 |
| PTRH1     | 9q34.11   | 0.098462118  | 0.189759 | 0.289122 |
| PRX       | 19q13.2   | -0.098441194 | 0.189853 | 0.289245 |
| LINC0024C | 6p22.2    | -0.098430733 | 0.189901 | 0.289295 |

|           |              |              |          |          |
|-----------|--------------|--------------|----------|----------|
| ERGIC1    | 5q35.1       | 0.098409809  | 0.189995 | 0.289417 |
| TM4SF4    | 3q25.1       | 0.098403532  | 0.190024 | 0.28943  |
| WDR45     | Xp11.23      | 0.09840144   | 0.190033 | 0.28943  |
| NR5A2     | 1q32.1       | -0.098380516 | 0.190128 | 0.289552 |
| ZNF224    | 19q13.31     | 0.098315653  | 0.190422 | 0.289978 |
| SCAND2P   | 15q25.2      | -0.098282175 | 0.190573 | 0.290187 |
| SLC35B3   | 6p24.3       | -0.098248698 | 0.190725 | 0.290396 |
| CMC2      | 16q23.2      | 0.098225682  | 0.19083  | 0.29051  |
| TRIB1     | 8q24.13      | 0.098225682  | 0.19083  | 0.29051  |
| RFX4      | 12q23.3      | -0.098213078 | 0.190887 | 0.290574 |
| MTMR8     | Xq11.2       | 0.098208943  | 0.190906 | 0.290574 |
| COPG2     | 7q32.2       | 0.09820685   | 0.190915 | 0.290574 |
| NCOA6     | 20q11.22     | -0.098196389 | 0.190963 | 0.290624 |
| HIST1H2AE | 6p22.2       | 0.098156238  | 0.191145 | 0.29088  |
| SLC22A12  | 11q13.1      | -0.098150754 | 0.19117  | 0.290895 |
| PDILT     | 16p12.3      | -0.098142266 | 0.191208 | 0.290931 |
| KLK14     | 19q13.41     | -0.098139147 | 0.191223 | 0.290931 |
| ST7-AS1   | 7q31.2       | -0.098133618 | 0.191248 | 0.290947 |
| EIF3H     | 8q23.3-q24.1 | 0.098112694  | 0.191343 | 0.29107  |
| CELP      | 9q34.13      | -0.098097787 | 0.191411 | 0.291151 |
| VSIR      | 10q22.1      | 0.098081309  | 0.191486 | 0.291243 |
| CDX2      | 13q12.2      | 0.098068755  | 0.191543 | 0.291308 |
| SLC2A2    | 3q26.2       | -0.098063549 | 0.191566 | 0.291321 |
| ECSIT     | 19p13.2      | 0.098060385  | 0.191581 | 0.291321 |
| AGAP2     | 12q14.1      | -0.098054108 | 0.191609 | 0.291342 |
| SIRPB2    | 20p13        | -0.098018538 | 0.191771 | 0.291567 |
| ABHD5     | 3p21.33      | -0.098010169 | 0.191809 | 0.291595 |
| CHID1     | 11p15.5      | -0.098008076 | 0.191819 | 0.291595 |
| HCRT      | 17q21.2      | 0.098000677  | 0.191853 | 0.291624 |
| GTPBP1    | 22q13.1      | 0.09799343   | 0.191886 | 0.291652 |
| EPOP      | 17q12        | -0.097978784 | 0.191952 | 0.291731 |
| LRFN2     | 6p21.2-p21.3 | -0.097955266 | 0.19206  | 0.291872 |
| C2ORF49   | 2q12.2       | 0.097934844  | 0.192153 | 0.291991 |
| ITIH1     | 3p21.1       | -0.097921639 | 0.192213 | 0.292048 |
| C5AR1     | 19q13.32     | -0.097920198 | 0.19222  | 0.292048 |
| MRPL39    | 21q21.3      | 0.097899274  | 0.192315 | 0.292171 |
| RNF165    | 18q21.1      | -0.097868986 | 0.192453 | 0.292359 |
| LENG1     | 19q13.42     | 0.097796748  | 0.192783 | 0.292838 |
| ZRSR2     | Xp22.2       | 0.097790471  | 0.192812 | 0.292859 |
| CACYBP    | 1q25.1       | 0.097742347  | 0.193032 | 0.293171 |
| BRAT1     | 7p22.3       | 0.097698408  | 0.193233 | 0.293447 |
| NAE1      | 16q22.1      | -0.097696315 | 0.193243 | 0.293447 |
| HILS1     | 17q21.33     | 0.09765575   | 0.193429 | 0.293693 |
| LRRCC1    | 8q21.2       | -0.097654468 | 0.193435 | 0.293693 |
| ARHGAP27F | 17q24.2      | -0.097633596 | 0.19353  | 0.293809 |
| CNOT10    | 3p22.3       | 0.097631452  | 0.19354  | 0.293809 |
| SAA1      | 11p15.1      | -0.097598026 | 0.193694 | 0.294019 |
| CCDC191   | 3q13.31      | 0.097572866  | 0.193809 | 0.294164 |
| FAM157B   | 9q34.3       | -0.097568588 | 0.193829 | 0.294164 |
| CTLA4     | 2q33.2       | -0.097567686 | 0.193833 | 0.294164 |
| POLR2L    | 11p15.5      | 0.097554035  | 0.193895 | 0.294229 |
| DNAJC30   | 7q11.23      | -0.097551943 | 0.193905 | 0.294229 |
| DHODH     | 16q22.2      | 0.097510096  | 0.194097 | 0.294498 |
| SPRED3    | 19q13.2      | -0.097498687 | 0.19415  | 0.294555 |

|           |           |              |          |          |
|-----------|-----------|--------------|----------|----------|
| FSCN3     | 7q32.1    | -0.097476271 | 0.194253 | 0.294689 |
| CCDC27    | 1p36.32   | -0.097464724 | 0.194306 | 0.294747 |
| EXOC3L1   | 16q22.1   | -0.097447325 | 0.194386 | 0.294846 |
| PRR22     | 19p13.3   | 0.097428494  | 0.194473 | 0.294955 |
| ARFGAP1   | 20q13.33  | 0.097418032  | 0.194521 | 0.295006 |
| ADCY10    | 1q24.2    | -0.097413609 | 0.194541 | 0.295014 |
| NAIF1     | 9q34.11   | 0.097386647  | 0.194665 | 0.29518  |
| GAGE2A    | Xp11.23   | -0.097372923 | 0.194728 | 0.295254 |
| MESP1     | 15q26.1   | -0.097368912 | 0.194747 | 0.295259 |
| GNL3L     | Xp11.22   | -0.097302952 | 0.195051 | 0.295689 |
| H1FOO     | 3q22.1    | 0.097300937  | 0.19506  | 0.295689 |
| ZNF182    | Xp11.23   | -0.097296675 | 0.19508  | 0.295689 |
| TMEM47    | Xp21.1    | 0.097294583  | 0.195089 | 0.295689 |
| CCDC18    | 1p22.1    | 0.097290398  | 0.195109 | 0.295696 |
| RASL12    | 15q22.31  | -0.097277844 | 0.195167 | 0.295761 |
| C21ORF58  | 21q22.3   | -0.097269475 | 0.195205 | 0.295797 |
| HIST1H2AE | 6p22.2    | 0.097250847  | 0.195291 | 0.295905 |
| OXR1      | 8q23.1    | 0.097215073  | 0.195456 | 0.296125 |
| PTDSS2    | 11p15.5   | -0.097212981 | 0.195466 | 0.296125 |
| NGRN      | 15q26.1   | 0.09719415   | 0.195553 | 0.296234 |
| OR6K6     | 1q23.1    | -0.097187223 | 0.195585 | 0.296238 |
| OR6Y1     | 1q23.1    | -0.097187223 | 0.195585 | 0.296238 |
| USP48     | 1p36.12   | -0.097171134 | 0.195659 | 0.296328 |
| CINP      | 14q32.31  | 0.09715021   | 0.195756 | 0.296452 |
| FRS3      | 6p21.1    | 0.097141841  | 0.195795 | 0.296488 |
| JTB       | 1q21.3    | 0.097129287  | 0.195853 | 0.296554 |
| ANGPTL7   | 1p36.22   | -0.097123039 | 0.195882 | 0.296575 |
| C17ORF67  | 17q22     | 0.097058147  | 0.196182 | 0.296985 |
| GLYR1     | 16p13.3   | -0.097058147 | 0.196182 | 0.296985 |
| OCIAD1    | 4p11      | -0.097026761 | 0.196327 | 0.297182 |
| NRIP1     | 21q11.2-c | -0.097014207 | 0.196386 | 0.297247 |
| RNF122    | 8p12      | -0.09700793  | 0.196415 | 0.297247 |
| WARS      | 14q32.2   | -0.09700793  | 0.196415 | 0.297247 |
| PRR7      | 5q35.3    | 0.097001653  | 0.196444 | 0.297268 |
| MT1DP     | 16q13     | -0.096994939 | 0.196475 | 0.297293 |
| HPX       | 11p15.4   | 0.096947252  | 0.196696 | 0.297605 |
| RRS1      | 8q13.1    | 0.096940975  | 0.196725 | 0.297627 |
| PGP       | 16p13.3   | 0.096917959  | 0.196832 | 0.297766 |
| CD14      | 5q31.3    | -0.096911682 | 0.196861 | 0.297787 |
| ALPI      | 2q37.1    | 0.096906453  | 0.196885 | 0.297801 |
| NOTCH3    | 19p13.12  | 0.096861465  | 0.197094 | 0.298095 |
| SERPINB1  | 18q21.33  | 0.0968562    | 0.197119 | 0.298109 |
| PHF2P1    | 13q12.11  | -0.096840273 | 0.197193 | 0.298183 |
| DGAT2L6   | Xq13.1    | -0.09683926  | 0.197197 | 0.298183 |
| CNOT3     | 19q13.42  | 0.096804971  | 0.197357 | 0.298402 |
| DFFB      | 1p36.32   | -0.096788233 | 0.197435 | 0.298497 |
| MAP11     | 7q22.1    | 0.096775678  | 0.197493 | 0.298563 |
| LOC728743 | 7q36.1    | -0.096771494 | 0.197513 | 0.298569 |
| ZNF792    | 19q13.11  | -0.096754755 | 0.197591 | 0.298665 |
| LOC643387 | 2q37.3    | 0.096727554  | 0.197717 | 0.298833 |
| WDR72     | 15q21.3   | 0.096720737  | 0.197749 | 0.298859 |
| PDIA4     | 7q36.1    | 0.096717092  | 0.197766 | 0.298862 |
| MAST1     | 19p13.13  | -0.096712908 | 0.197785 | 0.298869 |
| GRIN2A    | 16p13.2   | -0.096635491 | 0.198146 | 0.299391 |

|           |          |              |          |          |
|-----------|----------|--------------|----------|----------|
| GTF2A1L   | 2p16.3   | 0.096624712  | 0.198197 | 0.299445 |
| MORN2     | 2p22.1   | -0.096612475 | 0.198254 | 0.299508 |
| DUSP14    | 17q12    | 0.096606198  | 0.198283 | 0.299529 |
| H6PD      | 1p36.22  | -0.096602013 | 0.198302 | 0.299529 |
| CARMIL3   | 14q11.2  | -0.09659992  | 0.198312 | 0.299529 |
| VDAC3     | 8p11.21  | 0.096576905  | 0.19842  | 0.299661 |
| ATG13     | 11p11.2  | -0.096574812 | 0.198429 | 0.299661 |
| EDF1      | 9q34.3   | 0.096562258  | 0.198488 | 0.299727 |
| OR6B1     | 7q35     | 0.096555203  | 0.198521 | 0.299751 |
| SPECC1    | 17p11.2  | 0.096551796  | 0.198537 | 0.299751 |
| NBPF9     | 1q21.2   | -0.096547612 | 0.198556 | 0.299751 |
| TMEM89    | 3p21.31  | -0.096545886 | 0.198565 | 0.299751 |
| PTPN3     | 9q31.3   | -0.096484841 | 0.19885  | 0.300159 |
| KMO       | 1q43     | -0.096480656 | 0.198869 | 0.300166 |
| ZNF48     | 16p11.2  | -0.096470194 | 0.198918 | 0.300218 |
| IL13RA1   | Xq24     | -0.096434624 | 0.199085 | 0.300446 |
| SPRR2C    | 1q21.3   | 0.09643092   | 0.199102 | 0.300449 |
| PCDHA10   | 5q31.3   | -0.096426307 | 0.199124 | 0.300459 |
| ARGFXP2   | 17q11.2  | 0.096417663  | 0.199164 | 0.300498 |
| LLPH      | 12q14.3  | 0.096413701  | 0.199183 | 0.300503 |
| OAZ1      | 19p13.3  | 0.096403239  | 0.199232 | 0.300554 |
| AADA4L4   | 1p36.21  | -0.096385261 | 0.199316 | 0.300659 |
| NUDT3     | 6p21.31  | -0.096378131 | 0.199349 | 0.300686 |
| OAF       | 11q23.3  | 0.096357207  | 0.199447 | 0.300811 |
| DCAF4     | 14q24.2  | 0.096353022  | 0.199467 | 0.300818 |
| THEMIS2   | 1p35.3   | -0.096342561 | 0.199516 | 0.300862 |
| ARHGEF40  | 14q11.2  | -0.096340468 | 0.199526 | 0.300862 |
| STATH     | 4q13.3   | 0.096335247  | 0.19955  | 0.300876 |
| PCDHA12   | 5q31.3   | -0.096324233 | 0.199602 | 0.300931 |
| RAD50     | 5q31.1   | -0.096317452 | 0.199634 | 0.300956 |
| OR51Q1    | 11p15.4  | -0.096290981 | 0.199758 | 0.301121 |
| ERAP2     | 5q15     | 0.096267236  | 0.199869 | 0.301266 |
| ANKRD55   | 5q11.2   | -0.09625667  | 0.199919 | 0.301318 |
| SH3BP1    | 22q13.1  | 0.096250497  | 0.199948 | 0.301339 |
| CRYBB2    | 22q11.23 | -0.096239276 | 0.200001 | 0.301396 |
| ST7-OT4   | 7q31.2   | -0.096212165 | 0.200128 | 0.301565 |
| TNFRSF11A | 18q21.33 | 0.096202373  | 0.200174 | 0.301611 |
| GPNMB     | 7p15.3   | -0.096183542 | 0.200262 | 0.301722 |
| IL21R     | 16p12.1  | -0.096175172 | 0.200302 | 0.301759 |
| C12ORF57  | 12p13.31 | -0.096168895 | 0.200331 | 0.30178  |
| SNCB      | 5q35.2   | -0.096160617 | 0.20037  | 0.301816 |
| LINC00923 | 15q26.2  | 0.096156549  | 0.200389 | 0.301822 |
| MLN       | 6p21.31  | -0.096141956 | 0.200458 | 0.301903 |
| SLC25A36  | 3q23     | -0.096131233 | 0.200508 | 0.301956 |
| GLRA1     | 5q33.1   | -0.096110871 | 0.200604 | 0.302078 |
| LYZL4     | 3p22.1   | 0.096105437  | 0.20063  | 0.302093 |
| UBAP1L    | 15q22.31 | -0.09610199  | 0.200646 | 0.302095 |
| TMEM80    | 11p15.5  | -0.096085201 | 0.200725 | 0.302191 |
| ATP5F1B   | 12q13.3  | -0.096076831 | 0.200764 | 0.302228 |
| RANBP3    | 19p13.3  | 0.096072647  | 0.200784 | 0.302233 |
| TAS2R10   | 12p13.2  | -0.096069605 | 0.200798 | 0.302233 |
| TANK      | 2q24.2   | 0.096062185  | 0.200833 | 0.302263 |
| NT5DC2    | 3p21.1   | 0.096058     | 0.200853 | 0.30227  |
| CPLX3     | 15q24.1  | -0.096048613 | 0.200897 | 0.302314 |

|           |           |              |          |          |
|-----------|-----------|--------------|----------|----------|
| FCRL5     | 1q23. 1   | -0.096041764 | 0.20093  | 0.30234  |
| SUSD4     | 1q41      | -0.096032892 | 0.200971 | 0.30238  |
| KATNB1P6  | 6q24. 3   | -0.095991045 | 0.201169 | 0.302652 |
| SMIM21    | 18q23     | -0.095988146 | 0.201182 | 0.302652 |
| ZNF714    | 19p12     | -0.095978491 | 0.201228 | 0.302697 |
| MYOD1     | 11p15. 1  | 0.095958888  | 0.20132  | 0.302814 |
| KLHL7     | 7p15. 3   | -0.095932459 | 0.201445 | 0.302979 |
| TCF15     | 20p13     | 0.09591577   | 0.201524 | 0.303074 |
| CYP2F1    | 19q13. 2  | 0.095893764  | 0.201628 | 0.303208 |
| SOX30     | 5q33. 3   | -0.095878308 | 0.201701 | 0.303295 |
| NAA35     | 9q21. 33  | -0.095829933 | 0.201929 | 0.303616 |
| DUSP2     | 2q11. 2   | -0.095825749 | 0.201949 | 0.303623 |
| LBR       | 1q42. 12  | -0.095785994 | 0.202137 | 0.303879 |
| PPIAP80   | 7p15. 1   | -0.095783258 | 0.20215  | 0.303879 |
| FAM120A   | 9q22. 31  | 0.095775532  | 0.202187 | 0.303893 |
| ACSM2B    | 16p12. 3  | -0.095774875 | 0.20219  | 0.303893 |
| RSRC2     | 12q24. 31 | -0.095754608 | 0.202286 | 0.303984 |
| FAM186A   | 12q13. 12 | -0.095752566 | 0.202296 | 0.303984 |
| IDO1      | 8p11. 21  | -0.095752516 | 0.202296 | 0.303984 |
| IFNL2     | 19q13. 2  | 0.095726041  | 0.202421 | 0.304149 |
| SCGB2A1   | 11q12. 3  | -0.095706684 | 0.202513 | 0.304264 |
| STX7      | 6q23. 2   | -0.095702299 | 0.202534 | 0.304272 |
| S100A8    | 1q21. 3   | -0.095654175 | 0.202762 | 0.304592 |
| RP9P      | 7p14. 3   | 0.095616513  | 0.20294  | 0.304838 |
| FAM238C   | 10p12. 1  | -0.095602166 | 0.203009 | 0.304917 |
| KRT82     | 12q13. 13 | 0.09559284   | 0.203053 | 0.304961 |
| RGS11     | 16p13. 3  | -0.095589312 | 0.20307  | 0.304963 |
| SYNDIG1L  | 14q24. 3  | -0.095585835 | 0.203086 | 0.304965 |
| SLC41A2   | 12q23. 3  | 0.095568389  | 0.203169 | 0.305066 |
| PSPC1     | 13q12. 11 | 0.095541188  | 0.203298 | 0.305214 |
| SLBP      | 4p16. 3   | 0.095541188  | 0.203298 | 0.305214 |
| IQCE      | 7p22. 3   | 0.095499341  | 0.203497 | 0.30549  |
| CRYZL1    | 21q22. 11 | 0.095493064  | 0.203527 | 0.305512 |
| NAT14     | 19q13. 42 | 0.095457494  | 0.203696 | 0.305743 |
| LGR4      | 11p14. 1  | 0.095415647  | 0.203895 | 0.306019 |
| ANKRD16   | 10p15. 1  | -0.095403093 | 0.203955 | 0.306086 |
| LINC0208E | 3q12. 3   | 0.095376173  | 0.204083 | 0.306255 |
| HNF4G     | 8q21. 13  | 0.095367522  | 0.204125 | 0.30627  |
| OPRK1     | 8q11. 23  | -0.095364511 | 0.204139 | 0.30627  |
| VIPR1     | 3p22. 1   | -0.095363338 | 0.204144 | 0.30627  |
| TMEM164   | Xq23      | 0.095361245  | 0.204154 | 0.30627  |
| SLC4A2    | 7q36. 1   | 0.095354968  | 0.204184 | 0.306292 |
| BLVRA     | 7p13      | 0.095296382  | 0.204464 | 0.30667  |
| KNG1      | 3q27. 3   | 0.095295635  | 0.204467 | 0.30667  |
| AARSD1    | 17q21. 31 | 0.095281736  | 0.204534 | 0.306746 |
| GSPT2     | Xp11. 22  | 0.095275459  | 0.204564 | 0.306746 |
| STAR      | 8p11. 23  | -0.095275459 | 0.204564 | 0.306746 |
| IRX6      | 16q12. 2  | -0.095266551 | 0.204606 | 0.306774 |
| GZMB      | 14q12     | -0.095264997 | 0.204614 | 0.306774 |
| ADCK1     | 14q24. 3  | -0.095254535 | 0.204663 | 0.306826 |
| RHN01     | 12p13. 33 | 0.09525035   | 0.204683 | 0.306833 |
| NR2C1     | 12q22     | 0.095241981  | 0.204723 | 0.30687  |
| BCL2L13   | 22q11. 21 | -0.095237796 | 0.204743 | 0.306877 |
| SLC25A5   | Xq24      | -0.095231519 | 0.204773 | 0.306899 |

|           |           |              |          |          |
|-----------|-----------|--------------|----------|----------|
| APBB1IP   | 10p12.1   | -0.095218965 | 0.204833 | 0.306966 |
| TRIM55    | 8q13.1    | -0.095173814 | 0.205049 | 0.307266 |
| DDX39B    | 6p21.33   | 0.095166656  | 0.205083 | 0.307295 |
| TRIM65    | 17q25.1   | 0.095162471  | 0.205103 | 0.307301 |
| ESAM      | 11q24.2   | -0.09514364  | 0.205193 | 0.307413 |
| LINC01591 | 8q24.22   | -0.095130568 | 0.205256 | 0.307484 |
| ASB9      | Xp22.2    | -0.095122717 | 0.205294 | 0.307494 |
| COLEC11   | 2p25.3    | -0.095122717 | 0.205294 | 0.307494 |
| NSFL1C    | 20p13     | 0.095105978  | 0.205374 | 0.307591 |
| SNORA10   | 16p13.3   | -0.095096413 | 0.205419 | 0.307637 |
| FOXL2NB   | 3q22.3    | 0.095048035  | 0.205651 | 0.307961 |
| DHX35     | 20q11.23- | -0.095032745 | 0.205724 | 0.308047 |
| SZRD1     | 1p36.13   | -0.095026468 | 0.205755 | 0.308069 |
| TRMT6     | 20p12.3   | -0.094997175 | 0.205895 | 0.308248 |
| IL7       | 8q21.13   | 0.094995083  | 0.205905 | 0.308248 |
| MTG2      | 20q13.33  | -0.094986714 | 0.205945 | 0.308285 |
| CDKN2A    | 9p21.3    | 0.094967882  | 0.206035 | 0.308377 |
| CASP5     | 11q22.3   | -0.094967522 | 0.206037 | 0.308377 |
| B4GALT1   | 9p21.1    | 0.094944866  | 0.206146 | 0.308517 |
| SGTA      | 19p13.3   | 0.094938589  | 0.206176 | 0.308538 |
| LARP1     | 5q33.2    | -0.094934405 | 0.206196 | 0.308545 |
| CCDC59    | 12q21.31  | -0.094863264 | 0.206538 | 0.309034 |
| CNP       | 17q21.2   | -0.094848618 | 0.206608 | 0.309116 |
| NICN1     | 3p21.31   | -0.094842341 | 0.206638 | 0.309138 |
| XIRP2     | 2q24.3    | -0.094820338 | 0.206744 | 0.309273 |
| PGBD2     | 1q44      | -0.094813048 | 0.206779 | 0.309302 |
| OPN5      | 6p12.3    | -0.094799284 | 0.206845 | 0.309378 |
| QSER1     | 11p13     | -0.094783755 | 0.20692  | 0.309467 |
| ARAP2     | 4p14      | 0.094769108  | 0.206991 | 0.309549 |
| RPS18     | 6p21.32   | 0.094760739  | 0.207031 | 0.309586 |
| ATP6VOD2  | 8q21.3    | 0.094756554  | 0.207051 | 0.309593 |
| APOA4     | 11q23.3   | 0.094741965  | 0.207121 | 0.309675 |
| CNOT2     | 12q15     | -0.094727261 | 0.207192 | 0.309758 |
| DEFA5     | 8p23.1    | -0.094712291 | 0.207264 | 0.309842 |
| ETF1      | 5q31.2    | -0.09470843  | 0.207283 | 0.309847 |
| POC1B     | 12q21.33  | 0.094691691  | 0.207364 | 0.309944 |
| SNORA50C  | 17q23.3   | -0.094685578 | 0.207393 | 0.309965 |
| MYH13     | 17p13.1   | 0.094671344  | 0.207462 | 0.310045 |
| C200RF141 | 20p13     | -0.094657004 | 0.207531 | 0.310125 |
| CWF19L1   | 10q24.31  | -0.094614274 | 0.207737 | 0.31041  |
| TMPRSS9   | 19p13.3   | -0.094605038 | 0.207782 | 0.310453 |
| GDI2      | 10p15.1   | -0.09459335  | 0.207838 | 0.310492 |
| OR11H6    | 14q11.2   | -0.094593263 | 0.207838 | 0.310492 |
| PRKCSH    | 19p13.2   | 0.094545226  | 0.20807  | 0.310815 |
| GPR50     | Xq28      | -0.094534024 | 0.208125 | 0.310873 |
| CARMIL1   | 6p22.2    | 0.094513841  | 0.208222 | 0.310995 |
| CGAS      | 6q13      | -0.094501287 | 0.208283 | 0.311031 |
| AEBP2     | 12p12.3   | -0.094499194 | 0.208293 | 0.311031 |
| RPL30     | 8q22.2    | 0.094499194  | 0.208293 | 0.311031 |
| ZNF875    | 19q13.12  | 0.094492917  | 0.208323 | 0.311053 |
| COIL      | 17q22     | -0.094480363 | 0.208384 | 0.311121 |
| CCL13     | 17q12     | 0.094469951  | 0.208434 | 0.311173 |
| SNAP23    | 15q15.1-c | 0.09445944   | 0.208485 | 0.311225 |
| TEX37     | 2p11.2    | -0.09442131  | 0.20867  | 0.311477 |



|           |            |              |          |          |
|-----------|------------|--------------|----------|----------|
| FBX042    | 1p36. 13   | -0.094405038 | 0.208749 | 0.311572 |
| SFTPB     | 2p11. 2    | -0.094393962 | 0.208802 | 0.311629 |
| SPATA32   | 17q21. 31  | 0.094385855  | 0.208841 | 0.311664 |
| CAMKK2    | 12q24. 31  | -0.094382022 | 0.20886  | 0.311668 |
| CTAG2     | Xq28       | -0.094362524 | 0.208955 | 0.311786 |
| NOC3L     | 10q23. 33  | -0.094356914 | 0.208982 | 0.311787 |
| SNORA36B  | 1q41       | 0.094355932  | 0.208986 | 0.311787 |
| GGTLC1    | 20p11. 21  | 0.094345367  | 0.209038 | 0.31184  |
| DDX17     | 22q13. 1   | -0.094319252 | 0.209164 | 0.312006 |
| C12ORF10  | 12q13. 13  | 0.094300421  | 0.209256 | 0.312116 |
| PIN1P1    | 1p31. 1    | -0.094297585 | 0.209269 | 0.312116 |
| RAB2A     | 8q12. 1-q1 | -0.094287866 | 0.209317 | 0.312129 |
| CSH1      | 17q23. 3   | 0.094286111  | 0.209325 | 0.312129 |
| ZIM3      | 19q13. 43  | 0.094286111  | 0.209325 | 0.312129 |
| SGIP1     | 1p31. 3    | -0.094277405 | 0.209367 | 0.312169 |
| CCL5      | 17q12      | -0.094266943 | 0.209418 | 0.312221 |
| UTS2R     | 17q25. 3   | -0.094263272 | 0.209436 | 0.312225 |
| CBFB      | 16q22. 1   | 0.094227188  | 0.209611 | 0.312463 |
| TMEM255B  | 13q34      | -0.094185341 | 0.209815 | 0.312726 |
| LOC727896 | 18p11. 31  | -0.094184344 | 0.209819 | 0.312726 |
| TUBGCP6   | 22q13. 33  | -0.094174879 | 0.209865 | 0.312772 |
| DYNLL1    | 12q24. 31  | 0.09416651   | 0.209906 | 0.312809 |
| TRHR      | 8q23. 1    | -0.094149294 | 0.20999  | 0.31291  |
| FAM171A2  | 17q21. 31  | -0.094120527 | 0.21013  | 0.313049 |
| CCDC184   | 12q13. 11  | -0.094120478 | 0.21013  | 0.313049 |
| PLAC9     | 10q22. 3   | -0.094120478 | 0.21013  | 0.313049 |
| ABCA17P   | 16p13. 3   | -0.094110065 | 0.210181 | 0.313101 |
| NINL      | 20p11. 21  | -0.094089093 | 0.210283 | 0.313211 |
| OSMR      | 5p13. 1    | -0.094087    | 0.210293 | 0.313211 |
| SLC25A41  | 19p13. 3   | 0.094085321  | 0.210301 | 0.313211 |
| BECN1     | 17q21. 31  | 0.094076538  | 0.210344 | 0.313251 |
| CRLF2     | Xp22. 33 ε | -0.094064677 | 0.210402 | 0.313314 |
| BST1      | 4p15. 32   | 0.094047245  | 0.210487 | 0.313417 |
| CHRNA7    | 15q13. 3   | -0.094018985 | 0.210624 | 0.313599 |
| GABRD     | 1p36. 33   | 0.094003306  | 0.210701 | 0.313681 |
| OR51B4    | 11p15. 4   | -0.094001127 | 0.210711 | 0.313681 |
| WDR5B     | 3q21. 1    | -0.093990752 | 0.210762 | 0.313718 |
| HIST1H2BI | 6p22. 2    | -0.093989669 | 0.210767 | 0.313718 |
| IGDCC4    | 15q22. 31  | -0.093946812 | 0.210976 | 0.314006 |
| CCN1      | 1p22. 3    | -0.093942628 | 0.210997 | 0.314013 |
| GIPC3     | 19p13. 3   | -0.093930073 | 0.211058 | 0.314072 |
| ZNF384    | 12p13. 31  | 0.093927981  | 0.211068 | 0.314072 |
| RNF126P1  | 17q22      | 0.093895296  | 0.211228 | 0.314286 |
| FAM169B   | 15q26. 3   | 0.093876639  | 0.211319 | 0.314379 |
| CFHR1     | 1q31. 3    | -0.093876171 | 0.211321 | 0.314379 |
| MORC1     | 3q13. 13   | -0.093869639 | 0.211353 | 0.314388 |
| PCP2      | 19p13. 2   | 0.093868082  | 0.211361 | 0.314388 |
| RPS13     | 11p15. 1   | 0.09386521   | 0.211375 | 0.314388 |
| TP53RK    | 20q13. 12  | -0.093842194 | 0.211487 | 0.314532 |
| UXT-AS1   | Xp11. 23   | -0.093808717 | 0.211651 | 0.314752 |
| HACD4     | 9p21. 3    | -0.09379407  | 0.211723 | 0.314835 |
| DHRS13    | 17q11. 2   | 0.093785701  | 0.211764 | 0.314873 |
| MST1L     | 1p36. 13   | 0.093760593  | 0.211886 | 0.315032 |
| CPXM1     | 20p13      | -0.093754315 | 0.211917 | 0.315054 |

|           |           |              |          |          |
|-----------|-----------|--------------|----------|----------|
| FCGR2C    | 1q23.3    | -0.093737626 | 0.211999 | 0.315152 |
| NDUFAF8   | 17q25.3   | -0.093718745 | 0.212091 | 0.315266 |
| BDNF      | 11p14.1   | 0.09369573   | 0.212204 | 0.31541  |
| UGT2B15   | 4q13.2    | -0.093690548 | 0.21223  | 0.315425 |
| ACTG2     | 2p13.1    | 0.093655975  | 0.212399 | 0.315653 |
| HNRNPA3   | 2q31.2    | 0.093635051  | 0.212502 | 0.315782 |
| MLF1      | 3q25.32   | -0.093624589 | 0.212553 | 0.315835 |
| ALKAL2    | 2p25.3    | -0.093607899 | 0.212635 | 0.315933 |
| CFAP126   | 1q23.3    | -0.093597389 | 0.212686 | 0.315986 |
| LINC0221C | 17q21.31  | 0.093591112  | 0.212717 | 0.316009 |
| THAP8     | 19q13.12  | -0.093584835 | 0.212748 | 0.316031 |
| BAZ1A     | 14q13.1-c | 0.093566003  | 0.212841 | 0.316145 |
| CFAP65    | 2q35      | 0.093562014  | 0.21286  | 0.31615  |
| CD99      | Xp22.33 ε | -0.093555542 | 0.212892 | 0.316174 |
| SDHAF4    | 6q13      | -0.093542987 | 0.212954 | 0.316242 |
| CPXM2     | 10q26.13  | -0.093517879 | 0.213077 | 0.316385 |
| LINC02112 | 5p15.31-f | -0.093514198 | 0.213095 | 0.316385 |
| RCBTB2    | 13q14.2   | -0.093513694 | 0.213098 | 0.316385 |
| PASK      | 2q37.3    | -0.093507417 | 0.213128 | 0.316408 |
| BMP15     | Xp11.22   | -0.093496445 | 0.213182 | 0.316464 |
| ZNF267    | 16p11.2   | 0.093490679  | 0.213211 | 0.316483 |
| LINC01205 | 3q13.13   | 0.093483578  | 0.213246 | 0.316511 |
| PMS2      | 7p22.1    | -0.09346557  | 0.213334 | 0.316619 |
| CLEC2L    | 7q34      | -0.093459939 | 0.213362 | 0.316637 |
| OPCML     | 11q25     | 0.093432288  | 0.213498 | 0.316815 |
| SAMM50    | 22q13.31  | 0.093398615  | 0.213664 | 0.317038 |
| KCNMB4    | 12q15     | 0.093386061  | 0.213726 | 0.317068 |
| SFMBT1    | 3p21.1    | -0.093386061 | 0.213726 | 0.317068 |
| APCS      | 1q23.2    | 0.09338476   | 0.213732 | 0.317068 |
| IFNB1     | 9p21.3    | 0.093371046  | 0.2138   | 0.317145 |
| KRT27     | 17q21.2   | -0.093351931 | 0.213894 | 0.317261 |
| CA5BP1    | Xp22.2    | 0.093331659  | 0.213994 | 0.317386 |
| SNHG32    | 6p21.33   | -0.093325382 | 0.214025 | 0.317408 |
| TAF1C     | 16q24.1   | 0.093293997  | 0.214179 | 0.317614 |
| ST3GAL5   | 2p11.2    | -0.093289812 | 0.2142   | 0.317621 |
| IQCD      | 12q24.13  | -0.093250106 | 0.214396 | 0.317865 |
| BORCS6    | 17p13.1   | -0.093250058 | 0.214396 | 0.317865 |
| ZNF432    | 19q13.41  | -0.093227042 | 0.21451  | 0.31801  |
| TMEM212   | 3q26.31   | -0.093213022 | 0.214579 | 0.318077 |
| EMC7      | 15q14     | 0.093210303  | 0.214593 | 0.318077 |
| ENSA      | 1q21.3    | 0.09320821   | 0.214603 | 0.318077 |
| TCEA3     | 1p36.12   | 0.093178917  | 0.214748 | 0.318268 |
| DNASE2B   | 1p31.1-p2 | -0.093167082 | 0.214806 | 0.318331 |
| SCGB3A1   | 5q35.3    | 0.093143984  | 0.21492  | 0.318473 |
| MIF4GD    | 17q25.1   | -0.093141255 | 0.214934 | 0.318473 |
| RAB37     | 17q25.1   | -0.093130793 | 0.214986 | 0.318518 |
| APCDD1L   | 20q13.32  | 0.093128701  | 0.214996 | 0.318518 |
| HOXD9     | 2q31.1    | 0.093111962  | 0.215079 | 0.318617 |
| OR2Z1     | 19p13.2   | 0.093069431  | 0.215289 | 0.318905 |
| KRTAP4-11 | 17q21.2   | -0.09306396  | 0.215316 | 0.318921 |
| FIBIN     | 11p14.2   | -0.093047099 | 0.2154   | 0.319022 |
| SLC20A2   | 8p11.21   | 0.093019898  | 0.215535 | 0.319197 |
| HIGD2A    | 5q35.2    | 0.093015714  | 0.215555 | 0.319205 |
| ZNF608    | 5q23.2    | -0.092998975 | 0.215638 | 0.319304 |

|           |            |              |          |          |
|-----------|------------|--------------|----------|----------|
| RNU4ATAC  | 2q14. 2    | -0.092986513 | 0.2157   | 0.319372 |
| SPATA17   | 1q41       | -0.092942481 | 0.215918 | 0.319671 |
| ADAMTS8   | 11q24. 3   | -0.092929927 | 0.215981 | 0.31974  |
| DUSP9     | Xq28       | 0.092923722  | 0.216012 | 0.319762 |
| LINC00174 | 7q11. 21   | 0.09291528   | 0.216053 | 0.3198   |
| SEMA4F    | 2p13. 1    | -0.092892265 | 0.216168 | 0.319945 |
| UBE2V2    | 8q11. 21   | -0.092877618 | 0.21624  | 0.320029 |
| UQCR10    | 22q12. 2   | 0.092856694  | 0.216344 | 0.320151 |
| FBX028    | 1q42. 11   | 0.092854651  | 0.216355 | 0.320151 |
| COL1A1    | 17q21. 33  | 0.092810663  | 0.216573 | 0.320451 |
| FGF17     | 8p21. 3    | -0.09280189  | 0.216617 | 0.320492 |
| CAMK1     | 3p25. 3    | -0.092798109 | 0.216636 | 0.320496 |
| KMT5B     | 11q13. 2   | -0.092758354 | 0.216833 | 0.320764 |
| TNFAIP8L2 | 1q21. 3    | -0.092749984 | 0.216875 | 0.320802 |
| ITGB3BP   | 1p31. 3    | 0.0927458    | 0.216896 | 0.320809 |
| MED8      | 1p34. 2    | 0.092735338  | 0.216948 | 0.320863 |
| MBD6      | 12q13. 3   | 0.092731153  | 0.216969 | 0.32087  |
| RIOX2     | 3q11. 2    | -0.092693491 | 0.217156 | 0.321123 |
| HAR1A     | 20q13. 33  | -0.092670475 | 0.217271 | 0.321269 |
| PPP1R15B  | 1q32. 1    | -0.092634905 | 0.217448 | 0.321508 |
| LINC00301 | 11q12. 2   | 0.09260621   | 0.217591 | 0.321692 |
| VGLL3     | 3p12. 1    | -0.092603519 | 0.217605 | 0.321692 |
| B3GAT3    | 11q12. 3   | 0.092597242  | 0.217636 | 0.321697 |
| TCF7L1    | 2p11. 2    | -0.092593058 | 0.217657 | 0.321697 |
| ZNF195    | 11p15. 4   | 0.092593058  | 0.217657 | 0.321697 |
| UBXN2B    | 8q12. 1    | -0.092565857 | 0.217793 | 0.321874 |
| ALOX15B   | 17p13. 1   | 0.092549118  | 0.217876 | 0.321974 |
| HIST1H4E  | 6p22. 2    | 0.092538456  | 0.21793  | 0.322029 |
| MAD2L1    | 4q27       | 0.092534472  | 0.21795  | 0.322034 |
| MFSD11    | 17q25. 1-c | 0.092513548  | 0.218054 | 0.322152 |
| SYNGR4    | 19q13. 33  | -0.092512117 | 0.218061 | 0.322152 |
| SYDE1     | 19p13. 12  | 0.092500994  | 0.218117 | 0.32221  |
| ATP23     | 12q14. 1   | -0.092494717 | 0.218148 | 0.322233 |
| HAND1     | 5q33. 2    | -0.092480883 | 0.218217 | 0.322311 |
| TPT1      | 13q14. 13  | 0.092463331  | 0.218305 | 0.322417 |
| OR7E156P  | 13q21. 31  | -0.092444468 | 0.218399 | 0.322532 |
| HOXA7     | 7p15. 2    | -0.092427858 | 0.218483 | 0.322631 |
| CYP2D6    | 22q13. 2   | 0.092393286  | 0.218656 | 0.322862 |
| NR2F2     | 15q26. 2   | -0.092390099 | 0.218672 | 0.322862 |
| FOXP3     | Xp11. 23   | -0.09237336  | 0.218755 | 0.322962 |
| EEF1DP3   | 13q13. 1   | 0.092333206  | 0.218957 | 0.323224 |
| TRPA1     | 8q21. 11   | -0.092331561 | 0.218965 | 0.323224 |
| WASH2P    | 2q14. 1    | 0.092300128  | 0.219122 | 0.323432 |
| GCAT      | 22q13. 1   | -0.092285481 | 0.219196 | 0.323509 |
| PI4KAP1   | 22q11. 21  | -0.092283389 | 0.219206 | 0.323509 |
| CCNH      | 5q14. 3    | 0.092260373  | 0.219322 | 0.323655 |
| NOP14     | 4p16. 3    | -0.092241542 | 0.219416 | 0.323771 |
| KIAA0556  | 16p12. 1   | 0.092237357  | 0.219437 | 0.323778 |
| KRTAP5-11 | 11q13. 4   | 0.092211764  | 0.219566 | 0.323943 |
| ATP5ME    | 4p16. 3    | 0.092180863  | 0.219721 | 0.324148 |
| PRRX1     | 1q24. 2    | -0.092176679 | 0.219742 | 0.324155 |
| HACD2     | 3q21. 1    | -0.092092984 | 0.220163 | 0.324752 |
| PAF1      | 19q13. 2   | 0.092059507  | 0.220331 | 0.324977 |
| PMPCA     | 9q34. 3    | -0.092023937 | 0.22051  | 0.325217 |

|            |            |               |           |           |
|------------|------------|---------------|-----------|-----------|
| KRT20      | 17q21. 2   | 0. 092006019  | 0. 220601 | 0. 325326 |
| LTA        | 6p21. 33   | -0. 092000921 | 0. 220626 | 0. 32534  |
| GJA4       | 1p34. 3    | -0. 091977905 | 0. 220742 | 0. 325487 |
| AGPAT4-IT1 | 6q26       | -0. 091957991 | 0. 220843 | 0. 325611 |
| UBE2DNL    | Xq21. 1    | -0. 091903374 | 0. 221118 | 0. 325993 |
| GATA5      | 20q13. 33  | 0. 091897038  | 0. 22115  | 0. 326016 |
| ATAD2B     | 2p24. 1-p2 | -0. 091887933 | 0. 221196 | 0. 326051 |
| PARP16     | 15q22. 31  | 0. 091885841  | 0. 221207 | 0. 326051 |
| MAMDC4     | 9q34. 3    | 0. 091835624  | 0. 22146  | 0. 326401 |
| ADAM12     | 10q26. 2   | -0. 09182307  | 0. 221524 | 0. 326462 |
| NBEAL1     | 2q33. 2    | -0. 091820978 | 0. 221534 | 0. 326462 |
| ASAH2      | 10q11. 23  | -0. 091781751 | 0. 221732 | 0. 32673  |
| RAB11FIP4  | 17q11. 2   | 0. 091758207  | 0. 221852 | 0. 326881 |
| SIRPB1     | 20p13      | -0. 091722637 | 0. 222032 | 0. 327123 |
| POM121L1F  | 22q11. 22  | 0. 09170288   | 0. 222132 | 0. 327245 |
| POM121L8F  | 22q11. 21  | -0. 091699035 | 0. 222151 | 0. 327245 |
| MMACHC     | 1p34. 1    | -0. 091696531 | 0. 222164 | 0. 327245 |
| USP19      | 3p21. 31   | -0. 091653589 | 0. 222381 | 0. 327533 |
| TAF1A      | 1q41       | 0. 091651497  | 0. 222392 | 0. 327533 |
| ZCCHC13    | Xq13. 2    | 0. 091640844  | 0. 222446 | 0. 32755  |
| WT1-AS     | 11p13      | -0. 091639625 | 0. 222452 | 0. 32755  |
| RAG2       | 11p12      | -0. 091639489 | 0. 222453 | 0. 32755  |
| CDH26      | 20q13. 33  | -0. 091624296 | 0. 22253  | 0. 327639 |
| SERGEF     | 11p15. 1   | -0. 091601281 | 0. 222646 | 0. 327787 |
| TLE6       | 19p13. 3   | 0. 091580357  | 0. 222752 | 0. 327919 |
| EFCAB12    | 3q21. 3    | -0. 091571988 | 0. 222795 | 0. 327957 |
| OPA1       | 3q29       | -0. 091559433 | 0. 222859 | 0. 328018 |
| SNORA68    | 19p13. 11  | -0. 091557367 | 0. 222869 | 0. 328018 |
| USP17L6P   | 4p16. 1    | 0. 09152836   | 0. 223016 | 0. 328211 |
| TMOD4      | 1q21. 3    | 0. 091520949  | 0. 223054 | 0. 328219 |
| BRCC3      | Xq28       | 0. 091519679  | 0. 22306  | 0. 328219 |
| ZFAND1     | 8q21. 13   | -0. 091517586 | 0. 223071 | 0. 328219 |
| ZSCAN32    | 16p13. 3   | -0. 091509217 | 0. 223114 | 0. 328257 |
| RIBC2      | 22q13. 31  | -0. 091471554 | 0. 223305 | 0. 328514 |
| ANKRA2     | 5q13. 2    | -0. 091421338 | 0. 22356  | 0. 328841 |
| RPL39      | Xq24       | 0. 091421338  | 0. 22356  | 0. 328841 |
| KRTAP4-4   | 17q21. 2   | -0. 091385    | 0. 223745 | 0. 329041 |
| OR4F5      | 1p36. 33   | -0. 091385    | 0. 223745 | 0. 329041 |
| OR52E6     | 11p15. 4   | 0. 091385     | 0. 223745 | 0. 329041 |
| SCD        | 10q24. 31  | 0. 091373214  | 0. 223805 | 0. 329105 |
| DNMT1      | 19p13. 2   | -0. 091341876 | 0. 223965 | 0. 329305 |
| HIST1H4L   | 6p22. 1    | -0. 091339952 | 0. 223974 | 0. 329305 |
| USP25      | 21q21. 1   | -0. 091329274 | 0. 224029 | 0. 329361 |
| KIF25      | 6q27       | -0. 091289161 | 0. 224233 | 0. 329637 |
| PRSS1      | 7q34       | -0. 091285335 | 0. 224253 | 0. 329642 |
| STH        | 17q21. 31  | -0. 091258678 | 0. 224389 | 0. 329817 |
| TBPL2      | 14q22. 3   | 0. 091243511  | 0. 224466 | 0. 329907 |
| C11ORF71   | 11q23. 2   | -0. 091239303 | 0. 224487 | 0. 329914 |
| RNASEK     | 17p13. 1   | -0. 091216287 | 0. 224605 | 0. 330062 |
| KRT81      | 12q13. 13  | 0. 091193319  | 0. 224722 | 0. 330187 |
| GORASP1    | 3p22. 2    | 0. 091191179  | 0. 224733 | 0. 330187 |
| RAD54B     | 8q22. 1    | 0. 091189086  | 0. 224744 | 0. 330187 |
| CFAP77     | 9q34. 13   | 0. 091186691  | 0. 224756 | 0. 330187 |
| FAM205BP   | 9p13. 3    | -0. 091164028 | 0. 224872 | 0. 330333 |

|           |           |              |          |          |
|-----------|-----------|--------------|----------|----------|
| IL19      | 1q32.1    | 0.091148343  | 0.224952 | 0.330426 |
| RCOR2     | 11q13.1   | 0.091107484  | 0.225161 | 0.330709 |
| VPS16     | 20p13     | -0.091025882 | 0.225578 | 0.331297 |
| ACPP      | 3q22.1    | -0.091019605 | 0.22561  | 0.33132  |
| TFAP2B    | 6p12.3    | -0.091013127 | 0.225643 | 0.331345 |
| SEMG1     | 20q13.12  | 0.090995213  | 0.225735 | 0.331455 |
| DRG1      | 22q12.2   | -0.090981991 | 0.225803 | 0.33153  |
| RPL31P11  | 1q23.3    | -0.090969579 | 0.225866 | 0.331567 |
| DDB2      | 11p11.2   | 0.090967344  | 0.225878 | 0.331567 |
| CLCN2     | 3q27.1    | 0.090967296  | 0.225878 | 0.331567 |
| USF2      | 19q13.12  | -0.090946373 | 0.225985 | 0.3317   |
| B4GALNT2  | 17q21.32  | -0.09093266  | 0.226055 | 0.331779 |
| HGH1      | 8q24.3    | 0.090904526  | 0.2262   | 0.331967 |
| SLC17A4   | 6p22.2    | -0.090893493 | 0.226256 | 0.332012 |
| CDK5R1    | 17q11.2   | -0.090891972 | 0.226264 | 0.332012 |
| JHY       | 11q24.1   | -0.090887787 | 0.226286 | 0.332019 |
| GSPT1     | 16p13.13  | -0.09088151  | 0.226318 | 0.332042 |
| SNORA54   | 11p15.4   | -0.090868072 | 0.226387 | 0.332119 |
| KHK       | 2p23.3    | -0.090860586 | 0.226425 | 0.332151 |
| LINC0062C | 3p25.1    | 0.090850832  | 0.226475 | 0.3322   |
| PITPNB    | 22q12.1   | 0.090827109  | 0.226597 | 0.332346 |
| INTS6     | 13q14.3   | -0.090825016 | 0.226608 | 0.332346 |
| MCF2      | Xq27.1    | -0.090773286 | 0.226873 | 0.332711 |
| LINC01622 | 6p25.3    | 0.090764322  | 0.22692  | 0.332754 |
| TTC28-AS1 | 22q12.1   | -0.090737137 | 0.227059 | 0.332935 |
| SLC35G5   | 8p23.1    | 0.090695114  | 0.227275 | 0.333227 |
| DCAF12L2  | Xq25      | -0.090678968 | 0.227359 | 0.333308 |
| ADGRF2    | 6p12.3    | 0.090677917  | 0.227364 | 0.333308 |
| TTC9B     | 19q13.2   | 0.090673041  | 0.227389 | 0.333318 |
| MUL1      | 1p36.12   | 0.090670182  | 0.227404 | 0.333318 |
| OR6K3     | 1q23.1    | -0.090615087 | 0.227687 | 0.333709 |
| COL6A3    | 2q37.3    | -0.090609503 | 0.227716 | 0.333727 |
| MYNN      | 3q26.2    | -0.090578118 | 0.227878 | 0.333939 |
| PSMB7     | 9q33.3    | 0.090573933  | 0.2279   | 0.333946 |
| CCR3      | 3p21.31   | -0.09054741  | 0.228036 | 0.334122 |
| PRND      | 20p13     | 0.090540456  | 0.228072 | 0.33415  |
| MOB3C     | 1p33      | -0.090515347 | 0.228202 | 0.334316 |
| ABCD3     | 1p21.3    | -0.090492332 | 0.228321 | 0.334465 |
| PYGM      | 11q13.1   | -0.090475593 | 0.228407 | 0.334567 |
| UBE2MP1   | 16p11.2   | -0.090467223 | 0.22845  | 0.334606 |
| PTPN14    | 1q32.3-q4 | 0.09043793   | 0.228602 | 0.334803 |
| BET1P1    | 7q36.1    | -0.090403154 | 0.228781 | 0.335042 |
| HMGCS2    | 1p12      | 0.090378345  | 0.22891  | 0.335205 |
| CLEC11A   | 19q13.33  | 0.090358421  | 0.229013 | 0.335317 |
| GFRA4     | 20p13     | 0.090357068  | 0.22902  | 0.335317 |
| KRT10     | 17q21.2   | -0.090350051 | 0.229056 | 0.335321 |
| WDR86     | 7q36.1    | 0.090350051  | 0.229056 | 0.335321 |
| IDI2-AS1  | 10p15.3   | 0.090329128  | 0.229164 | 0.335455 |
| P2RX6     | 22q11.21  | -0.090304019 | 0.229294 | 0.335621 |
| MUCL1     | 12q13.2   | -0.090291691 | 0.229358 | 0.33569  |
| CUTA      | 6p21.32   | 0.090264265  | 0.2295   | 0.335864 |
| NOS1AP    | 1q23.3    | -0.090262172 | 0.229511 | 0.335864 |
| CCL17     | 16q21     | 0.090223361  | 0.229712 | 0.336134 |
| OR51A7    | 11p15.4   | -0.090212916 | 0.229766 | 0.336189 |

|           |           |              |          |          |
|-----------|-----------|--------------|----------|----------|
| SLC12A3   | 16q13     | -0.090200995 | 0.229828 | 0.336255 |
| GPR160    | 3q26.2    | 0.090176386  | 0.229956 | 0.336417 |
| PNLDC1    | 6q25.3    | -0.090155461 | 0.230064 | 0.336551 |
| CCL19     | 9p13.3    | -0.090142955 | 0.230129 | 0.336621 |
| MFF       | 2q36.3    | 0.090101061  | 0.230347 | 0.336915 |
| PSPN      | 19p13.3   | -0.090096582 | 0.23037  | 0.336924 |
| ARHGEF10  | 8p23.3    | 0.09007386   | 0.230488 | 0.337072 |
| ATP7B     | 13q14.3   | 0.090067583  | 0.230521 | 0.337095 |
| THPO      | 3q27.1    | -0.090023832 | 0.230748 | 0.337403 |
| DSP       | 6p24.3    | -0.090019459 | 0.230771 | 0.337412 |
| ITLN2     | 1q23.3    | -0.090012934 | 0.230805 | 0.337437 |
| NQO2      | 6p25.2    | 0.09000272   | 0.230858 | 0.33749  |
| ACAP1     | 17p13.1   | -0.089946226 | 0.231152 | 0.337867 |
| ABCB9     | 12q24.31  | 0.089935765  | 0.231207 | 0.337867 |
| OR10H3    | 19p13.12  | -0.089934445 | 0.231213 | 0.337867 |
| SCARNA23  | Xp22.11   | -0.089934445 | 0.231213 | 0.337867 |
| SPANXN4   | Xq27.3    | -0.089934445 | 0.231213 | 0.337867 |
| XYLB      | 3p22.2    | 0.089933672  | 0.231217 | 0.337867 |
| XKR3      | 22q11.1   | -0.089893666 | 0.231426 | 0.338147 |
| BCO2      | 11q23.1   | 0.089872994  | 0.231534 | 0.338279 |
| AOPEP     | 9q22.32   | 0.089833239  | 0.231741 | 0.338558 |
| OTUD1     | 10p12.2   | -0.089799761 | 0.231916 | 0.338788 |
| QTRT2     | 3q13.31   | 0.089774653  | 0.232047 | 0.338955 |
| FAM170A   | 5q23.1    | -0.08976507  | 0.232097 | 0.339003 |
| SPCS2P4   | 1p35.3    | -0.089760007 | 0.232123 | 0.339017 |
| LINC0159C | 6q15      | -0.089726529 | 0.232298 | 0.339248 |
| LRRN4CL   | 11q12.3   | 0.089722344  | 0.23232  | 0.339255 |
| OR2A12    | 7q35      | 0.089701201  | 0.232431 | 0.339391 |
| SPP1      | 4q22.1    | 0.089686774  | 0.232506 | 0.339477 |
| LIMS2     | 2q14.3    | 0.089665851  | 0.232615 | 0.339612 |
| OR2H1     | 6p22.1    | -0.089628288 | 0.232812 | 0.339874 |
| ZG16      | 16p11.2   | -0.089608282 | 0.232917 | 0.340002 |
| NPPA      | 1p36.22   | -0.089592206 | 0.233001 | 0.3401   |
| TP53I13   | 17q11.2   | 0.089554956  | 0.233196 | 0.34036  |
| ZBTB25    | 14q23.3   | -0.089550771 | 0.233218 | 0.340367 |
| CORO1A    | 16p11.2   | -0.089538217 | 0.233284 | 0.340438 |
| LRRC46    | 17q21.32  | 0.089534032  | 0.233306 | 0.340445 |
| MCTS1     | Xq24      | 0.089527755  | 0.233338 | 0.340468 |
| CHAC1     | 15q15.1   | 0.089481723  | 0.23358  | 0.340771 |
| USP32     | 17q23.1-c | -0.089481723 | 0.23358  | 0.340771 |
| GTPBP10   | 7q21.13   | 0.089421045  | 0.233898 | 0.341211 |
| CCDC17    | 1p34.1    | 0.089410583  | 0.233953 | 0.341266 |
| CHST12    | 7p22.3    | -0.089404306 | 0.233986 | 0.341289 |
| RBMS2     | 12q13.3   | 0.089400121  | 0.234008 | 0.341296 |
| DCDC2B    | 1p35.2    | 0.089396433  | 0.234028 | 0.341299 |
| INSRR     | 1q23.1    | -0.089375404 | 0.234138 | 0.341418 |
| TRHDE     | 12q21.1   | -0.089374434 | 0.234143 | 0.341418 |
| SH3PXD2B  | 5q35.1    | -0.089331074 | 0.234371 | 0.341726 |
| TRIM35    | 8p21.2    | -0.089308058 | 0.234492 | 0.341877 |
| OMA1      | 1p32.2-p3 | 0.089272488  | 0.234679 | 0.342114 |
| CRELD1    | 3p25.3    | 0.089268303  | 0.234701 | 0.342114 |
| LRRC26    | 9q34.3    | 0.089265035  | 0.234719 | 0.342114 |
| WDR70     | 5p13.2    | -0.089264118 | 0.234723 | 0.342114 |
| CDKN1C    | 11p15.4   | 0.089257841  | 0.234756 | 0.342138 |

|           |          |              |          |          |
|-----------|----------|--------------|----------|----------|
| ZNRF2P1   | 7p14.3   | -0.089249472 | 0.2348   | 0.342177 |
| GPALPP1   | 13q14.12 | 0.089234825  | 0.234878 | 0.342264 |
| SLC23A1   | 5q31.2   | 0.089226456  | 0.234922 | 0.342304 |
| RPL38     | 17q25.1  | 0.089211809  | 0.234999 | 0.342391 |
| PITRM1    | 10p15.2  | -0.089188793 | 0.23512  | 0.342543 |
| LAIR1     | 19q13.42 | -0.089180424 | 0.235164 | 0.342582 |
| SLC2A5    | 1p36.23  | 0.089140669  | 0.235374 | 0.342862 |
| TOGARAM2  | 2p23.2   | -0.089122931 | 0.235467 | 0.342957 |
| FKBP9     | 7p14.3   | 0.089121838  | 0.235473 | 0.342957 |
| BRIP1     | 17q23.2  | 0.089082083  | 0.235683 | 0.343238 |
| LY6H      | 8q24.3   | -0.089031913 | 0.235948 | 0.343599 |
| ZNF587    | 19q13.43 | 0.089027682  | 0.23597  | 0.343606 |
| TNFRSF4   | 1p36.33  | 0.088983742  | 0.236202 | 0.343919 |
| CIP2A     | 3q13.13  | 0.088967004  | 0.236291 | 0.344023 |
| CKAP2     | 13q14.3  | -0.088935618 | 0.236457 | 0.34424  |
| RNASE2    | 14q11.2  | 0.088931433  | 0.236479 | 0.344247 |
| HDAC6     | Xp11.23  | -0.088927249 | 0.236501 | 0.344248 |
| FRMD7     | Xq26.2   | 0.088921984  | 0.236529 | 0.344248 |
| WNT16     | 7q31.31  | -0.088921484 | 0.236532 | 0.344248 |
| RCN1      | 11p13    | -0.088916787 | 0.236557 | 0.344259 |
| ADAM20    | 14q24.2  | 0.088892014  | 0.236688 | 0.344425 |
| FRK       | 6q22.1   | -0.088887494 | 0.236712 | 0.344435 |
| SEPTIN12  | 16p13.3  | 0.088878934  | 0.236757 | 0.344476 |
| TMEM205   | 19p13.2  | 0.088868663  | 0.236811 | 0.34453  |
| EIF3E     | 8q23.1   | -0.088833093 | 0.237    | 0.344754 |
| ROCK1     | 18q11.1  | -0.088833093 | 0.237    | 0.344754 |
| UBL4A     | Xq28     | 0.088826816  | 0.237033 | 0.344777 |
| DNPH1     | 6p21.1   | 0.088810077  | 0.237122 | 0.344881 |
| PDGFB     | 22q13.1  | 0.088805892  | 0.237144 | 0.344888 |
| ANKRD31   | 5q13.3   | -0.088799076 | 0.23718  | 0.344916 |
| FMC1      | 7q34     | -0.088791292 | 0.237222 | 0.344951 |
| LCNL1     | 9q34.3   | 0.088666666  | 0.237883 | 0.345887 |
| NEK6      | 9q33.3   | 0.088644781  | 0.237999 | 0.346022 |
| PDIA3     | 15q15.3  | 0.088640596  | 0.238022 | 0.346022 |
| TAS1R2    | 1p36.13  | 0.088639514  | 0.238027 | 0.346022 |
| CSTF3     | 11p13    | -0.088625949 | 0.2381   | 0.346101 |
| SEPTIN4   | 17q22    | -0.088596656 | 0.238255 | 0.346303 |
| RIMS3     | 1p34.2   | -0.088579918 | 0.238344 | 0.346376 |
| SNAR-B2   | 19q13.33 | -0.088575741 | 0.238367 | 0.346376 |
| RAB1A     | 2p14     | 0.088575733  | 0.238367 | 0.346376 |
| CT83      | Xq23     | 0.088573838  | 0.238377 | 0.346376 |
| TGIF2LY   | Yp11.2   | -0.088570885 | 0.238392 | 0.346376 |
| FAM209A   | 20q13.31 | 0.0885645    | 0.238426 | 0.3464   |
| HNF1A-AS1 | 12q24.31 | -0.088521517 | 0.238655 | 0.346707 |
| PTH2      | 19q13.33 | -0.0884909   | 0.238818 | 0.346919 |
| KRTAP19-ε | 21q22.11 | -0.088483889 | 0.238856 | 0.346923 |
| OR14A16   | 1q44     | 0.088483889  | 0.238856 | 0.346923 |
| LINC00623 | 1p11.2   | 0.088448099  | 0.239046 | 0.347175 |
| MAL       | 2q11.1   | -0.088436637 | 0.239108 | 0.347238 |
| SLC9C1    | 3q13.2   | -0.088418487 | 0.239204 | 0.347354 |
| ADH6      | 4q23     | -0.08840416  | 0.239281 | 0.34744  |
| LIN28A    | 1p36.11  | -0.08838115  | 0.239404 | 0.347593 |
| PRR26     | 10p15.3  | -0.08832465  | 0.239705 | 0.348005 |
| DPM2      | 9q34.11  | 0.088301634  | 0.239828 | 0.348159 |

|           |           |              |          |          |
|-----------|-----------|--------------|----------|----------|
| ELP6      | 3p21. 31  | -0.088293265 | 0.239873 | 0.348198 |
| DNAJB8    | 3q21. 3   | 0.08825998   | 0.240051 | 0.348431 |
| OXTR      | 3p25. 3   | 0.088249325  | 0.240108 | 0.348489 |
| ZBBX      | 3q26. 1   | -0.088229887 | 0.240212 | 0.348614 |
| TMEM184B  | 22q13. 1  | 0.088226309  | 0.240231 | 0.348617 |
| ATXN3L    | Xp22. 2   | 0.088194488  | 0.240401 | 0.348838 |
| SLC6A3    | 5p15. 33  | -0.088187309 | 0.24044  | 0.348869 |
| FCAMR     | 1q32. 1   | -0.088160686 | 0.240582 | 0.34905  |
| BASP1     | 5p15. 1   | -0.0881468   | 0.240657 | 0.349133 |
| CMYA5     | 5q14. 1   | -0.088134246 | 0.240724 | 0.349205 |
| GABPB2    | 1q21. 3   | 0.088127969  | 0.240758 | 0.349229 |
| CD5L      | 1q23. 1   | -0.088121105 | 0.240794 | 0.349243 |
| PODXL     | 7q32. 3   | 0.088119599  | 0.240802 | 0.349243 |
| KLK12     | 19q13. 41 | 0.088110558  | 0.240851 | 0.349268 |
| REN       | 1q32. 1   | 0.088106796  | 0.240871 | 0.349268 |
| KRTAP5-3  | 11p15. 5  | 0.088106577  | 0.240872 | 0.349268 |
| MVK       | 12q24. 11 | 0.088094491  | 0.240937 | 0.349337 |
| RIDA      | 8q22. 2   | -0.088069383 | 0.241072 | 0.349497 |
| GRAMD2B   | 5q23. 2   | 0.08806729   | 0.241083 | 0.349497 |
| C5ORF63   | 5q23. 2   | 0.088058921  | 0.241128 | 0.349537 |
| RIMKLB    | 12p13. 31 | 0.087975226  | 0.241577 | 0.350163 |
| ACTA2     | 10q23. 31 | 0.087935472  | 0.241791 | 0.350447 |
| HMGB3     | Xq28      | -0.087931287 | 0.241813 | 0.350454 |
| CIT       | 12q24. 23 | 0.08792501   | 0.241847 | 0.350478 |
| CASP3     | 4q35. 1   | 0.087910363  | 0.241925 | 0.350556 |
| CFL1P1    | 10q23. 31 | -0.087908394 | 0.241936 | 0.350556 |
| ADSSL1    | 14q32. 33 | -0.087895717 | 0.242004 | 0.350604 |
| CHDH      | 3p21. 1   | -0.087895717 | 0.242004 | 0.350604 |
| HRH3      | 20q13. 33 | -0.08788363  | 0.242069 | 0.350651 |
| GRIN2D    | 19q13. 33 | 0.087883163  | 0.242072 | 0.350651 |
| PKLR      | 1q22      | -0.087876993 | 0.242105 | 0.350666 |
| MTSS2     | 16q22. 1  | -0.087874793 | 0.242117 | 0.350666 |
| MEIG1     | 10p13     | -0.08785237  | 0.242237 | 0.350815 |
| PDE6G     | 17q25. 3  | -0.087841316 | 0.242297 | 0.350876 |
| MKRN3     | 15q11. 2  | -0.08783392  | 0.242337 | 0.350897 |
| LINC01142 | 1q24. 2   | 0.087829182  | 0.242362 | 0.350897 |
| PRPF40B   | 12q13. 12 | 0.087828762  | 0.242364 | 0.350897 |
| AASS      | 7q31. 32  | -0.0878183   | 0.242421 | 0.350954 |
| TNFSF13B  | 13q33. 3  | -0.087801561 | 0.242511 | 0.351048 |
| MYL4      | 17q21. 32 | 0.087799652  | 0.242521 | 0.351048 |
| EIF1AX    | Xp22. 12  | -0.087780637 | 0.242624 | 0.351171 |
| SPAG1     | 8q22. 2   | 0.087768083  | 0.242691 | 0.351234 |
| KRT37     | 17q21. 2  | 0.087766074  | 0.242702 | 0.351234 |
| TD02      | 4q32. 1   | -0.087740883 | 0.242838 | 0.351405 |
| MRPS16    | 10q22. 2  | 0.087736698  | 0.24286  | 0.351412 |
| DUSP15    | 20q11. 21 | -0.087699035 | 0.243064 | 0.35168  |
| CCDC125   | 5q13. 2   | 0.087692758  | 0.243097 | 0.351704 |
| LDHAL6A   | 11p15. 1  | -0.087679754 | 0.243168 | 0.351773 |
| HSPH1     | 13q12. 3  | 0.087671835  | 0.24321  | 0.351773 |
| ZNF250    | 8q24. 3   | -0.087671835 | 0.24321  | 0.351773 |
| ZNF425    | 7q36. 1   | -0.087670834 | 0.243216 | 0.351773 |
| NDUFS4    | 5q11. 2   | 0.087642542  | 0.243368 | 0.351968 |
| NIPSNAP1  | 22q12. 2  | -0.087613249 | 0.243527 | 0.352172 |
| HSD17B1   | 17q21. 2  | -0.087604879 | 0.243572 | 0.352202 |



|           |          |              |          |          |
|-----------|----------|--------------|----------|----------|
| WDR61     | 15q25.1  | -0.087602787 | 0.243583 | 0.352202 |
| CD177     | 19q13.31 | 0.087590416  | 0.24365  | 0.35225  |
| LRRC3     | 21q22.3  | 0.087590233  | 0.243651 | 0.35225  |
| ISLR2     | 15q24.1  | 0.087581863  | 0.243696 | 0.352289 |
| GPR25     | 1q32.1   | 0.087575646  | 0.24373  | 0.352313 |
| PRINS     | 10p12.1  | 0.087564804  | 0.243788 | 0.352372 |
| DGLUCY    | 14q32.11 | 0.087556755  | 0.243832 | 0.352409 |
| FLACC1    | 2q33.1   | -0.087536365 | 0.243942 | 0.352543 |
| YJU2      | 19p13.3  | 0.087523277  | 0.244013 | 0.352618 |
| ZNF784    | 19q13.42 | 0.087519093  | 0.244035 | 0.352618 |
| ZNF763    | 19p13.2  | -0.087517    | 0.244047 | 0.352618 |
| FBX041    | 2p13.2   | -0.087510723 | 0.244081 | 0.352641 |
| CCDC7     | 10p11.22 | -0.087485615 | 0.244217 | 0.352812 |
| HSD52     | 1p32.1   | -0.087481309 | 0.24424  | 0.35282  |
| TIMM13    | 19p13.3  | 0.087475153  | 0.244273 | 0.352843 |
| TNFRSF8   | 1p36.22  | -0.087468876 | 0.244307 | 0.35285  |
| GTF2H1    | 11p15.1  | -0.087466784 | 0.244319 | 0.35285  |
| MTVR2     | 17q22    | 0.0874645    | 0.244331 | 0.35285  |
| PIWIL3    | 22q11.23 | -0.08745334  | 0.244391 | 0.352912 |
| ICAM4     | 19p13.2  | 0.087420752  | 0.244568 | 0.353128 |
| MRS2P2    | 12q21.1  | -0.087419209 | 0.244576 | 0.353128 |
| CYB561A3  | 11q12.2  | -0.08741029  | 0.244625 | 0.353163 |
| SMG1P5    | 16p11.2  | -0.087408198 | 0.244636 | 0.353163 |
| CPA4      | 7q32.2   | 0.087378905  | 0.244795 | 0.353357 |
| SPRN      | 10q26.3  | -0.087376813 | 0.244806 | 0.353357 |
| PCDH20    | 13q21.2  | 0.087360531  | 0.244894 | 0.353459 |
| TDRG1     | 6p21.2   | -0.087326677 | 0.245078 | 0.353674 |
| YME1L1    | 10p12.1  | -0.087326596 | 0.245078 | 0.353674 |
| RDH10     | 8q21.11  | 0.087314042  | 0.245146 | 0.353746 |
| SYCP3     | 12q23.2  | 0.087308736  | 0.245175 | 0.353762 |
| RSU1      | 10p13    | -0.087293118 | 0.24526  | 0.353824 |
| LOC642929 | 9q21.11  | -0.087291135 | 0.245271 | 0.353824 |
| SPEG      | 2q35     | -0.087291026 | 0.245271 | 0.353824 |
| DCAF1     | 3p21.2   | -0.087284749 | 0.245305 | 0.353839 |
| ZNF320    | 19q13.41 | -0.087282656 | 0.245317 | 0.353839 |
| EPB41L4A  | 5q22.1   | 0.087263825  | 0.245419 | 0.353961 |
| DIRC1     | 2q32.2   | -0.087246497 | 0.245513 | 0.354057 |
| CD180     | 5q12.3   | -0.087244994 | 0.245521 | 0.354057 |
| HEMK1     | 3p21.31  | 0.087236625  | 0.245567 | 0.354088 |
| LGMN      | 14q32.12 | 0.087234532  | 0.245578 | 0.354088 |
| LOC100129 | 1p36.32  | -0.087227255 | 0.245618 | 0.35412  |
| WASHC2A   | 10q11.23 | -0.087221978 | 0.245646 | 0.354135 |
| LINC00662 | 19q11    | -0.087217839 | 0.245669 | 0.354142 |
| IRX1      | 5p15.33  | -0.087210959 | 0.245706 | 0.354148 |
| FAM27C    | 9q13     | 0.087207332  | 0.245726 | 0.354148 |
| IGFBP2    | 2q35     | -0.087207332 | 0.245726 | 0.354148 |
| NR2F1-AS1 | 15q15    | 0.087201055  | 0.24576  | 0.354172 |
| COL6A2    | 21q22.3  | 0.087167577  | 0.245942 | 0.354408 |
| SNHG29    | 17p11.2  | -0.087163392 | 0.245965 | 0.354416 |
| TOE1      | 1p34.1   | -0.08715293  | 0.246022 | 0.354472 |
| MTDH      | 8q22.1   | -0.087140376 | 0.24609  | 0.354545 |
| ESYT2     | 7q36.3   | 0.087132007  | 0.246136 | 0.354585 |
| SPA17     | 11q24.2  | 0.087088067  | 0.246375 | 0.354904 |
| LSP1P4    | 2p11.2   | 0.087079698  | 0.24642  | 0.354935 |

|            |             |               |           |           |
|------------|-------------|---------------|-----------|-----------|
| NMRK1      | 9q21. 13    | 0. 087077606  | 0. 246432 | 0. 354935 |
| FKBP15     | 9q32        | -0. 087073421 | 0. 246454 | 0. 354935 |
| MIR1-1HG   | 20q13. 33   | 0. 087071087  | 0. 246467 | 0. 354935 |
| BTN2A1     | 6p22. 2     | -0. 08704622  | 0. 246603 | 0. 355104 |
| SCGB2A2    | 11q12. 3    | -0. 087040788 | 0. 246632 | 0. 355121 |
| TIPARP-AS3 | 3q25. 31    | 0. 087027389  | 0. 246705 | 0. 355148 |
| TM9SF1     | 14q12       | -0. 087027389 | 0. 246705 | 0. 355148 |
| PMEL       | 12q13. 2    | 0. 087025297  | 0. 246717 | 0. 355148 |
| ZNF20      | 19p13. 2    | 0. 087023204  | 0. 246728 | 0. 355148 |
| CLDN5      | 22q11. 21   | -0. 087021112 | 0. 246739 | 0. 355148 |
| MYOM1      | 18p11. 31   | 0. 087008558  | 0. 246808 | 0. 355221 |
| CSNK1G2-A  | 19p13. 3    | 0. 086967641  | 0. 247031 | 0. 355516 |
| ATP1A4     | 1q23. 2     | -0. 086930309 | 0. 247235 | 0. 355784 |
| PMS2P5     | 7q11. 23    | 0. 086908125  | 0. 247356 | 0. 355932 |
| SNX24      | 5q23. 2     | 0. 086897663  | 0. 247413 | 0. 355989 |
| NSUN6      | 10p12. 31   | -0. 086887201 | 0. 24747  | 0. 356046 |
| FAM153B    | 5q35. 2     | 0. 086855616  | 0. 247643 | 0. 356268 |
| RPGRIP1    | 14q11. 2    | -0. 086837075 | 0. 247744 | 0. 356388 |
| ZNF121     | 19p13. 2    | 0. 086820246  | 0. 247836 | 0. 356495 |
| PLCXD1     | Xp22. 33 ε  | 0. 086813969  | 0. 24787  | 0. 356519 |
| HSBP1      | 16q23. 3    | 0. 086799322  | 0. 24795  | 0. 356608 |
| GGT3P      | 22q11. 21   | 0. 086765844  | 0. 248134 | 0. 356846 |
| MAGEA12    | Xq28        | 0. 086751189  | 0. 248214 | 0. 356936 |
| PHYH       | 10p13       | -0. 086698889 | 0. 2485   | 0. 357322 |
| MFNG       | 22q13. 1    | -0. 086669596 | 0. 248661 | 0. 357501 |
| ZNF211     | 19q13. 43   | 0. 086669596  | 0. 248661 | 0. 357501 |
| STAG3L3    | 7q11. 23    | 0. 086657042  | 0. 248729 | 0. 357574 |
| PFN4       | 2p23. 3     | 0. 086640348  | 0. 248821 | 0. 35768  |
| PWRN1      | 15q11. 2    | -0. 086621002 | 0. 248927 | 0. 357775 |
| CRTC1      | 19p13. 11   | -0. 086619379 | 0. 248936 | 0. 357775 |
| TAS2R42    | 12p13. 2    | -0. 086617087 | 0. 248949 | 0. 357775 |
| TEX14      | 17q22       | -0. 086615285 | 0. 248958 | 0. 357775 |
| RHBDD3     | 22q12. 2    | -0. 086583809 | 0. 249131 | 0. 357997 |
| TRIM16L    | 17p11. 2    | 0. 086579625  | 0. 249154 | 0. 358004 |
| GAS8       | 16q24. 3    | 0. 086571255  | 0. 2492   | 0. 358045 |
| KDM5D      | Yq11. 223   | -0. 08655518  | 0. 249288 | 0. 358146 |
| MORC3      | 21q22. 12   | -0. 086546147 | 0. 249338 | 0. 358165 |
| PAFAH1B2   | 11q23. 3    | -0. 086546147 | 0. 249338 | 0. 358165 |
| KRTAP5-6   | 11p15. 5    | 0. 086536557  | 0. 24939  | 0. 358215 |
| C1QTNF1    | 17q25. 3    | -0. 086523131 | 0. 249464 | 0. 35827  |
| TASP1      | 20p12. 1    | -0. 086523131 | 0. 249464 | 0. 35827  |
| RPL37A     | 2q35        | 0. 086510577  | 0. 249533 | 0. 35833  |
| TMEM95     | 17p13. 1    | 0. 086508931  | 0. 249542 | 0. 35833  |
| STAC3      | 12q13. 3    | 0. 086481284  | 0. 249694 | 0. 358507 |
| EDDM3B     | 14q11. 2    | -0. 086480069 | 0. 249701 | 0. 358507 |
| RBKS       | 2p23. 2     | 0. 086428975  | 0. 249982 | 0. 358884 |
| DLGAP2     | 8p23. 3     | -0. 086385616 | 0. 25022  | 0. 359201 |
| CHCHD3     | 7q32. 3-q32 | 0. 086380851  | 0. 250246 | 0. 359213 |
| ODF4       | 17p13. 1    | 0. 086371126  | 0. 2503   | 0. 359264 |
| THSD1P1    | 13q14. 3    | -0. 08635365  | 0. 250396 | 0. 359376 |
| RAMAC      | 15q25. 2    | 0. 086336911  | 0. 250488 | 0. 35948  |
| GPX6       | 6p22. 1     | 0. 086331329  | 0. 250519 | 0. 35948  |
| CABCOC01   | 10q21. 2    | -0. 086330679 | 0. 250523 | 0. 35948  |
| KIR3DL2    | 19q13. 42   | -0. 086302191 | 0. 25068  | 0. 35968  |

|           |          |              |          |          |
|-----------|----------|--------------|----------|----------|
| RFWD3     | 16q23.1  | -0.086297156 | 0.250707 | 0.359693 |
| TAGLN     | 11q23.3  | 0.086290879  | 0.250742 | 0.359717 |
| TTC21A    | 3p22.2   | -0.086286695 | 0.250765 | 0.359725 |
| METTL18   | 1q24.2   | 0.086244848  | 0.250996 | 0.36003  |
| PRCD      | 17q25.1  | -0.086240663 | 0.251019 | 0.360037 |
| RPL31     | 2q11.2   | 0.086217647  | 0.251146 | 0.360193 |
| PNLIPRP1  | 10q25.3  | -0.086194937 | 0.251271 | 0.360324 |
| SYNE2     | 14q23.2  | -0.086194631 | 0.251273 | 0.360324 |
| ARRB1     | 11q13.4  | -0.086190446 | 0.251296 | 0.360331 |
| FAM209B   | 20q13.31 | 0.086185747  | 0.251322 | 0.360342 |
| CORIN     | 4p12     | 0.086179985  | 0.251354 | 0.360362 |
| SPRY4     | 5q31.3   | 0.086146507  | 0.251539 | 0.360601 |
| TRIM49D2  | 11q14.3  | 0.086141446  | 0.251567 | 0.360616 |
| SEC14L1P1 | 11p11.2  | -0.086138137 | 0.251585 | 0.360616 |
| ADAM5     | 8p11.22  | 0.086131183  | 0.251623 | 0.360645 |
| MMP3      | 11q22.2  | -0.086099283 | 0.2518   | 0.360872 |
| NEURL2    | 20q13.12 | -0.086039797 | 0.252129 | 0.361317 |
| PRKCG     | 19q13.42 | 0.086012776  | 0.252278 | 0.361481 |
| FN3K      | 17q25.3  | -0.086012596 | 0.252279 | 0.361481 |
| KCNQ2     | 20q13.33 | -0.085968735 | 0.252522 | 0.361803 |
| CFH       | 1q31.3   | -0.085924717 | 0.252766 | 0.362118 |
| LITAF     | 16p13.13 | -0.085922625 | 0.252778 | 0.362118 |
| IGLL1     | 22q11.23 | -0.085870069 | 0.253069 | 0.362509 |
| MAOA      | Xp11.3   | -0.085864039 | 0.253102 | 0.362531 |
| TINCR     | 19p13.3  | -0.085853577 | 0.25316  | 0.362588 |
| OR4F29    | 1p36.33  | 0.085834011  | 0.253269 | 0.362718 |
| GRINA     | 8q24.3   | 0.085830561  | 0.253288 | 0.362719 |
| RERG      | 12p12.3  | -0.08581173  | 0.253393 | 0.362843 |
| ALG1      | 16p13.3  | 0.085807545  | 0.253416 | 0.36285  |
| RAB24     | 5q35.3   | 0.085799176  | 0.253462 | 0.362891 |
| FAM204A   | 10q26.11 | -0.085748959 | 0.253741 | 0.363264 |
| LRRC15    | 3q29     | 0.085696695  | 0.254032 | 0.363654 |
| RB1       | 13q14.2  | -0.08566945  | 0.254183 | 0.363845 |
| PLA2G12B  | 10q22.1  | -0.085657453 | 0.25425  | 0.363914 |
| CAV3      | 3p25.3   | -0.085652486 | 0.254278 | 0.363928 |
| GAA       | 17q25.3  | -0.085633879 | 0.254381 | 0.36405  |
| BLOC1S2   | 10q24.31 | -0.08562551  | 0.254428 | 0.364088 |
| CNPY4     | 7q22.1   | -0.085619233 | 0.254463 | 0.364088 |
| MYO9B     | 19p13.11 | 0.085619233  | 0.254463 | 0.364088 |
| 3-Mar     | 5q23.2   | -0.085596217 | 0.254591 | 0.364196 |
| ATP13A1   | 19p13.11 | 0.085592032  | 0.254614 | 0.364196 |
| MEI1      | 22q13.2  | -0.08558994  | 0.254626 | 0.364196 |
| DCUN1D1   | 3q26.33  | -0.085587848 | 0.254638 | 0.364196 |
| ADAD1     | 4q27     | -0.085582778 | 0.254666 | 0.364196 |
| HYAL6P    | 7q31.32  | -0.085582778 | 0.254666 | 0.364196 |
| LACRT     | 12q13.2  | -0.085582778 | 0.254666 | 0.364196 |
| ZNF358    | 19p13.2  | 0.085560647  | 0.254789 | 0.364347 |
| APOE      | 19q13.32 | 0.085541816  | 0.254894 | 0.364469 |
| AGFG1     | 2q36.3   | 0.085535539  | 0.254929 | 0.364469 |
| ZNF146    | 19q13.12 | -0.085535539 | 0.254929 | 0.364469 |
| C200RF197 | 20q13.33 | -0.085520028 | 0.255016 | 0.364495 |
| AMIG03    | 3p21.31  | -0.0855188   | 0.255023 | 0.364495 |
| BRD7P3    | 6q22.31  | -0.085517272 | 0.255031 | 0.364495 |
| SEPHS1P1  | 7q11.21  | -0.08551681  | 0.255034 | 0.364495 |

|           |           |              |          |          |
|-----------|-----------|--------------|----------|----------|
| DMBT1P1   | 10q26.13  | 0.085515852  | 0.255039 | 0.364495 |
| ZNF137P   | 19q13.41  | 0.085491599  | 0.255174 | 0.364644 |
| ANP32D    | 12q13.11  | -0.085490627 | 0.25518  | 0.364644 |
| DRAM1     | 12q23.2   | -0.085458121 | 0.255361 | 0.364867 |
| PRSS48    | 4q31.3    | 0.085455929  | 0.255373 | 0.364867 |
| ZNF750    | 17q25.3   | -0.085452935 | 0.25539  | 0.364867 |
| SDSL      | 12q24.13  | -0.085437198 | 0.255478 | 0.364966 |
| C6        | 5p13.1    | -0.085433013 | 0.255501 | 0.364973 |
| HHIPL2    | 1q41      | -0.085414594 | 0.255604 | 0.365094 |
| BRPF1     | 3p25.3    | -0.085399535 | 0.255688 | 0.365188 |
| CLDN8     | 21q22.11  | -0.085395852 | 0.255709 | 0.365191 |
| ALDH1B1   | 9p13.1    | -0.085391166 | 0.255735 | 0.365203 |
| C4ORF51   | 4q31.21   | 0.085379577  | 0.2558   | 0.365251 |
| RLF       | 1p34.2    | -0.085378612 | 0.255805 | 0.365251 |
| PLCG2     | 16q23.3   | -0.085366058 | 0.255875 | 0.365325 |
| OR52I1    | 11p15.4   | -0.085352748 | 0.25595  | 0.365404 |
| SNORA11D  | Xp11.22   | -0.085349539 | 0.255968 | 0.365404 |
| ZNF431    | 19p12     | -0.085309564 | 0.256191 | 0.365653 |
| TGM6      | 20p13     | 0.085308501  | 0.256197 | 0.365653 |
| KRT73     | 12q13.13  | -0.085306239 | 0.25621  | 0.365653 |
| TMEM240   | 1p36.33   | 0.085305379  | 0.256215 | 0.365653 |
| LINC01144 | 1p34.1    | -0.085294918 | 0.256273 | 0.36571  |
| CALHM6    | 6q22.1    | -0.085257255 | 0.256484 | 0.365985 |
| CASQ1     | 1q23.2    | -0.085236496 | 0.2566   | 0.366124 |
| OLA1      | 2q31.1    | 0.085207039  | 0.256765 | 0.366334 |
| CST7      | 20p11.21  | -0.085200762 | 0.2568   | 0.366358 |
| HGC6.3    | 6q27      | -0.085172545 | 0.256959 | 0.366557 |
| SYNPR     | 3p14.2    | -0.085139342 | 0.257145 | 0.366797 |
| PPP1R32   | 11q12.2   | 0.085131714  | 0.257188 | 0.366822 |
| EDEM2     | 20q11.22  | 0.085129621  | 0.257199 | 0.366822 |
| NXPH3     | 17q21.33  | -0.085094051 | 0.257399 | 0.36708  |
| SCARNA9   | 11q21     | -0.085090134 | 0.257421 | 0.367086 |
| ZFAND3    | 6p21.2    | -0.085081497 | 0.257469 | 0.367129 |
| SH2B2     | 7q22.1    | 0.085064758  | 0.257563 | 0.367236 |
| NDUFB6    | 9p21.1    | -0.08503965  | 0.257704 | 0.367411 |
| COL22A1   | 8q24.23-c | 0.085031281  | 0.257751 | 0.367434 |
| FAM170B   | 10q11.23  | -0.085030305 | 0.257757 | 0.367434 |
| FAM104A   | 17q25.1   | 0.085020819  | 0.25781  | 0.367483 |
| RTF2      | 20q13.31  | 0.084985249  | 0.25801  | 0.367742 |
| CCDC8     | 19q13.32  | -0.084981064 | 0.258034 | 0.367749 |
| UTP3      | 4q13.3    | 0.084974787  | 0.258069 | 0.367773 |
| ITGB3     | 17q21.32  | -0.08496851  | 0.258104 | 0.367797 |
| ENC1      | 5q13.3    | 0.084962233  | 0.258139 | 0.367797 |
| CLDN25    | 11q23.2   | 0.084958523  | 0.25816  | 0.367797 |
| LIMK2     | 22q12.2   | -0.084953864 | 0.258187 | 0.367797 |
| PRAC1     | 17q21.32  | 0.084952243  | 0.258196 | 0.367797 |
| OR6C76    | 12q13.2   | -0.084952235 | 0.258196 | 0.367797 |
| GP2       | 16p12.3   | -0.084943846 | 0.258243 | 0.367838 |
| RAB4A     | 1q42.13   | -0.084920386 | 0.258375 | 0.368    |
| CLPSL1    | 6p21.31   | 0.084914992  | 0.258405 | 0.368017 |
| FCSK      | 16q22.1   | 0.084893185  | 0.258528 | 0.368165 |
| KCTD15    | 19q13.11  | -0.084882723 | 0.258587 | 0.368223 |
| CITED1    | Xq13.1    | -0.084876446 | 0.258622 | 0.368247 |
| LCE1D     | 1q21.3    | -0.084856129 | 0.258737 | 0.368384 |

|           |           |               |           |           |
|-----------|-----------|---------------|-----------|-----------|
| SORBS3    | 8p21. 3   | 0. 084832507  | 0. 25887  | 0. 368547 |
| FBRSL1    | 12q24. 33 | -0. 084828322 | 0. 258893 | 0. 368554 |
| SOX1      | 13q34     | -0. 084793973 | 0. 259087 | 0. 368787 |
| YAE1      | 7p14. 1   | -0. 084792796 | 0. 259094 | 0. 368787 |
| USP5      | 12p13. 31 | -0. 084786475 | 0. 259129 | 0. 368811 |
| CSF3R     | 1p34. 3   | -0. 084773921 | 0. 2592   | 0. 368886 |
| CREB3     | 9p13. 3   | 0. 084758273  | 0. 259288 | 0. 368985 |
| KLHDC9    | 1q23. 3   | -0. 084752997 | 0. 259318 | 0. 369001 |
| PRH2      | 12p13. 2  | 0. 084745718  | 0. 259359 | 0. 369033 |
| NAGA      | 22q13. 2  | 0. 084713243  | 0. 259542 | 0. 369268 |
| C9ORF170  | 9q21. 33  | -0. 08470991  | 0. 259561 | 0. 369268 |
| DPY19L2P1 | 7p14. 2   | -0. 084703695 | 0. 259596 | 0. 369292 |
| TEX19     | 17q25. 3  | -0. 084666107 | 0. 259808 | 0. 369549 |
| LOC606724 | 16p11. 2  | -0. 084665118 | 0. 259814 | 0. 369549 |
| ABCC1     | 16p13. 11 | 0. 084656749  | 0. 259861 | 0. 369582 |
| KLK13     | 19q13. 41 | 0. 084652548  | 0. 259885 | 0. 369582 |
| MSGN1     | 2p24. 2   | 0. 084650225  | 0. 259898 | 0. 369582 |
| APOC4     | 19q13. 32 | 0. 084647931  | 0. 259911 | 0. 369582 |
| CDKN2B    | 9p21. 3   | 0. 084623271  | 0. 26005  | 0. 369754 |
| WDR66     | 12q24. 31 | -0. 084596071 | 0. 260204 | 0. 369946 |
| SYCP1     | 1p13. 2   | -0. 084591021 | 0. 260233 | 0. 36996  |
| CELA2A    | 1p36. 21  | -0. 084575469 | 0. 260321 | 0. 370059 |
| DBH       | 9q34. 2   | -0. 084554608 | 0. 260439 | 0. 3702   |
| AIFM3     | 22q11. 21 | 0. 084543762  | 0. 2605   | 0. 370261 |
| NDUFC1    | 4q31. 1   | 0. 0845333    | 0. 260559 | 0. 370319 |
| UCP3      | 11q13. 4  | -0. 084520746 | 0. 26063  | 0. 370394 |
| IRS4      | Xq22. 3   | -0. 084514939 | 0. 260663 | 0. 370414 |
| SH2D7     | 15q25. 1  | 0. 084482123  | 0. 260849 | 0. 370652 |
| PPP2R2C   | 4p16. 1   | 0. 084437051  | 0. 261104 | 0. 370988 |
| OCSTAMP   | 20q13. 12 | 0. 084432701  | 0. 261129 | 0. 370997 |
| IGFLR1    | 19q13. 12 | -0. 08442659  | 0. 261164 | 0. 37102  |
| GRAMD1B   | 11q24. 1  | 0. 08441822   | 0. 261211 | 0. 371061 |
| CRYBA2    | 2q35      | -0. 084399959 | 0. 261315 | 0. 371182 |
| NIPAL1    | 4p12      | 0. 084393112  | 0. 261354 | 0. 371201 |
| CENPI     | Xq22. 1   | 0. 08439102   | 0. 261365 | 0. 371201 |
| TSPEAR-AS | 21q22. 3  | -0. 084372075 | 0. 261473 | 0. 371327 |
| SLAMF8    | 1q23. 2   | -0. 084353357 | 0. 261579 | 0. 371452 |
| RPS12     | 6q23. 2   | -0. 08434708  | 0. 261615 | 0. 371466 |
| GDF9      | 5q31. 1   | -0. 084344988 | 0. 261627 | 0. 371466 |
| NHLH2     | 1p13. 1   | -0. 084334811 | 0. 261684 | 0. 371522 |
| DDT       | 22q11. 23 | 0. 084324064  | 0. 261745 | 0. 371556 |
| EFEMP2    | 11q13. 1  | 0. 084324064  | 0. 261745 | 0. 371556 |
| LETMD1    | 12q13. 12 | -0. 084304231 | 0. 261858 | 0. 371669 |
| LOC646813 | 11p11. 12 | 0. 084303485  | 0. 261862 | 0. 371669 |
| CXORF40A  | Xq28      | -0. 084296864 | 0. 2619   | 0. 371696 |
| COPS2     | 15q21. 1  | -0. 084292679 | 0. 261924 | 0. 371703 |
| SAMD11    | 1p36. 33  | -0. 084284309 | 0. 261971 | 0. 371744 |
| SUN2      | 22q13. 1  | 0. 084278032  | 0. 262007 | 0. 371768 |
| HOXA1     | 7p15. 2   | -0. 084273848 | 0. 262031 | 0. 371776 |
| HECTD1    | 14q12     | -0. 084238278 | 0. 262233 | 0. 372036 |
| LBP       | 20q11. 23 | -0. 084225291 | 0. 262307 | 0. 372114 |
| NR1H4     | 12q23. 1  | 0. 084215438  | 0. 262363 | 0. 37215  |
| CFAP97D1  | 17q21. 31 | -0. 084211202 | 0. 262387 | 0. 37215  |
| COL5A1    | 9q34. 3   | 0. 084211077  | 0. 262387 | 0. 37215  |

|           |          |              |          |          |
|-----------|----------|--------------|----------|----------|
| SP011     | 20q13.31 | 0.084185861  | 0.262531 | 0.372327 |
| CRIPT     | 2p21     | 0.084175507  | 0.26259  | 0.372374 |
| DPY19L4   | 8q22.1   | -0.084173415 | 0.262602 | 0.372374 |
| DEFB136   | 8p23.1   | -0.084132223 | 0.262836 | 0.372496 |
| GAGE12F   | Xp11.23  | -0.084132223 | 0.262836 | 0.372496 |
| GAGE2E    | Xp11.23  | -0.084132223 | 0.262836 | 0.372496 |
| GSX1      | 13q12.2  | -0.084132223 | 0.262836 | 0.372496 |
| KRTAP19-3 | 21q22.11 | -0.084132223 | 0.262836 | 0.372496 |
| KRTAP6-1  | 21q22.11 | -0.084132223 | 0.262836 | 0.372496 |
| OR4F4     | 15q26.3  | -0.084132223 | 0.262836 | 0.372496 |
| SNAR-C4   | 19q13.33 | -0.084132223 | 0.262836 | 0.372496 |
| SLC22A11  | 11q13.1  | 0.084121986  | 0.262894 | 0.372552 |
| HABP2     | 10q25.3  | -0.084116921 | 0.262923 | 0.372566 |
| WNT3A     | 1q42.13  | 0.084111552  | 0.262954 | 0.372583 |
| SH3D19    | 4q31.3   | -0.084087628 | 0.26309  | 0.37275  |
| PKP2      | 12p11.21 | 0.084068797  | 0.263197 | 0.372875 |
| TBC1D3G   | 17q12    | 0.08405251   | 0.26329  | 0.37298  |
| LSM11     | 5q33.3   | -0.084043688 | 0.26334  | 0.373025 |
| CETN4P    | 4q27     | -0.084028936 | 0.263425 | 0.373118 |
| MEP1A     | 6p12.3   | -0.083988356 | 0.263656 | 0.37341  |
| FUNDC1    | Xp11.3   | 0.083985102  | 0.263675 | 0.37341  |
| NPC1      | 18q11.2  | 0.08398301   | 0.263687 | 0.37341  |
| HYPM      | Xp11.4   | 0.083971105  | 0.263754 | 0.373475 |
| CFAP36    | 2p16.1   | -0.083968364 | 0.26377  | 0.373475 |
| UPP2      | 2q24.1   | -0.083964882 | 0.26379  | 0.373477 |
| SCN5A     | 3p22.2   | 0.083926516  | 0.264009 | 0.373724 |
| UGT2A3    | 4q13.2   | 0.083924914  | 0.264018 | 0.373724 |
| BRICD5    | 16p13.3  | 0.083924424  | 0.264021 | 0.373724 |
| SNORA14A  | 7q11.23  | -0.083900806 | 0.264156 | 0.373882 |
| SUFU      | 10q24.32 | -0.083897223 | 0.264176 | 0.373882 |
| INKA1     | 3p21.31  | -0.083895131 | 0.264188 | 0.373882 |
| C15ORF54  | 15q14    | -0.08388406  | 0.264252 | 0.373945 |
| UPF3A     | 13q34    | -0.083847007 | 0.264463 | 0.3742   |
| REC114    | 15q24.1  | -0.083846012 | 0.264469 | 0.3742   |
| ATP6VOD1  | 16q22.1  | -0.083821899 | 0.264607 | 0.374368 |
| PLEKHG2   | 19q13.2  | 0.083794698  | 0.264763 | 0.374556 |
| C10RF87   | 1p32.1   | -0.08379046  | 0.264787 | 0.374556 |
| AMY2A     | 1p21.1   | -0.083788903 | 0.264796 | 0.374556 |
| TM2D1     | 1p31.3   | 0.083746574  | 0.265038 | 0.374872 |
| SERPINA9  | 14q32.13 | -0.083730619 | 0.265129 | 0.374975 |
| SCARNA15  | 15q25.2  | -0.083715799 | 0.265214 | 0.375068 |
| LINC00698 | 3p14.2   | -0.08368754  | 0.265376 | 0.375271 |
| NBEAP1    | 15q11.2  | -0.083617982 | 0.265775 | 0.375808 |
| FAM81A    | 15q22.2  | 0.083610571  | 0.265818 | 0.375842 |
| SAFB2     | 19p13.3  | -0.083585462 | 0.265962 | 0.376019 |
| WSB1      | 17q11.1  | 0.083566631  | 0.26607  | 0.376145 |
| KIF1C     | 17p13.2  | 0.083526876  | 0.266298 | 0.376441 |
| OR2L8     | 1q44     | -0.083515678 | 0.266362 | 0.376505 |
| ASB12     | Xq11.2   | 0.083508461  | 0.266404 | 0.376523 |
| C17ORF64  | 17q23.2  | -0.083506953 | 0.266413 | 0.376523 |
| FAM149B1  | 10q22.2  | 0.083501768  | 0.266442 | 0.376538 |
| HGFAC     | 4p16.3   | 0.083495456  | 0.266479 | 0.376563 |
| KAAG1     | 6p22.3   | 0.083488163  | 0.266521 | 0.376596 |
| SLC44A3   | 1p21.3   | 0.083474567  | 0.266599 | 0.376679 |

|           |           |              |          |          |
|-----------|-----------|--------------|----------|----------|
| GBE1      | 3p12. 2   | -0.083457829 | 0.266695 | 0.376789 |
| LOC441601 | 11p11. 12 | -0.083439748 | 0.266799 | 0.376909 |
| PARG      | 10q11. 23 | -0.08342021  | 0.266911 | 0.377041 |
| LINC0100C | 7q32. 1   | 0.083415981  | 0.266936 | 0.377049 |
| SH2D1B    | 1q23. 3   | 0.083399243  | 0.267032 | 0.377158 |
| MAFG-DT   | 17q25. 3  | 0.083317641  | 0.267502 | 0.377795 |
| MEX3A     | 1q22      | 0.083300902  | 0.267598 | 0.377905 |
| LACC1     | 13q14. 11 | -0.083269516 | 0.267779 | 0.378134 |
| SGCZ      | 8p22      | -0.083256307 | 0.267855 | 0.378203 |
| PRSS54    | 16q21     | -0.083254477 | 0.267866 | 0.378203 |
| DDTL      | 22q11. 23 | 0.083190007  | 0.268238 | 0.378701 |
| CCDC107   | 9p13. 3   | 0.083169083  | 0.268359 | 0.378845 |
| PGM5P2    | 9p11. 2   | -0.083165458 | 0.26838  | 0.378848 |
| CNBD1     | 8q21. 3   | -0.083154655 | 0.268442 | 0.378909 |
| HLA-DRB1  | 6p21. 32  | -0.083135606 | 0.268552 | 0.379038 |
| ICAM2     | 17q23. 3  | 0.083127236  | 0.268601 | 0.379079 |
| DDO       | 6q21      | -0.083074927 | 0.268903 | 0.379479 |
| OR52B4    | 11p15. 4  | -0.083070683 | 0.268928 | 0.379487 |
| FAM86EP   | 4p16. 3   | 0.083064466  | 0.268964 | 0.379511 |
| MAGEB6    | Xp21. 3   | 0.083059742  | 0.268991 | 0.379523 |
| BPIFB3    | 20q11. 21 | -0.083055979 | 0.269013 | 0.379527 |
| ARFGAP3   | 22q13. 2  | -0.083026803 | 0.269181 | 0.379738 |
| RNF168    | 3q29      | -0.082976587 | 0.269472 | 0.380121 |
| NOS3      | 7q36. 1   | -0.082964032 | 0.269545 | 0.380197 |
| MMP27     | 11q22. 2  | -0.082959265 | 0.269572 | 0.380209 |
| APEX1     | 14q11. 2  | 0.082945201  | 0.269654 | 0.380297 |
| PFN3      | 5q35. 3   | 0.082889107  | 0.269979 | 0.380729 |
| ZSCAN16   | 6p22. 1   | 0.082865692  | 0.270115 | 0.380894 |
| TOR2A     | 9q34. 11  | -0.082830122 | 0.270321 | 0.381158 |
| SUV39H1   | Xp11. 23  | -0.082825937 | 0.270346 | 0.381165 |
| UXT       | Xp11. 23  | 0.08281966   | 0.270382 | 0.38118  |
| COPB2     | 3q23      | -0.082817567 | 0.270394 | 0.38118  |
| IFITM5    | 11p15. 5  | 0.082805472  | 0.270464 | 0.381252 |
| HBBP1     | 11p15. 4  | 0.082800477  | 0.270493 | 0.381253 |
| SPINDOC   | 11q13. 1  | -0.082798736 | 0.270503 | 0.381253 |
| CRLF3     | 17q11. 2  | 0.08278409   | 0.270588 | 0.381346 |
| CSNK1A1P1 | 15q14     | -0.082774087 | 0.270647 | 0.381395 |
| ANKRD50   | 4q28. 1   | 0.082771536  | 0.270661 | 0.381395 |
| SETD6     | 16q21     | -0.082765259 | 0.270698 | 0.38142  |
| DISP1     | 1q41      | -0.082750612 | 0.270783 | 0.381513 |
| SLC10A4   | 4p11      | -0.082742459 | 0.27083  | 0.381552 |
| IFT20     | 17q11. 2  | -0.082727596 | 0.270917 | 0.381647 |
| TSPAN4    | 11p15. 5  | 0.082715042  | 0.27099  | 0.381723 |
| CT45A3    | Xq26. 3   | -0.082681667 | 0.271184 | 0.381943 |
| DEFB118   | 20q11. 21 | -0.082681667 | 0.271184 | 0.381943 |
| INS       | 11p15. 5  | 0.082658981  | 0.271316 | 0.382069 |
| UBN1      | 16p13. 3  | -0.082658548 | 0.271318 | 0.382069 |
| POP5      | 12q24. 31 | 0.082656456  | 0.27133  | 0.382069 |
| RFFL      | 17q12     | 0.082652271  | 0.271355 | 0.382076 |
| KCNQ10T1  | 11p15. 5  | 0.082604147  | 0.271635 | 0.382434 |
| RNF113A   | Xq24      | 0.082602055  | 0.271647 | 0.382434 |
| CFAP52    | 17p13. 1  | -0.082589676 | 0.271719 | 0.382508 |
| RAMP1     | 2q37. 3   | 0.082579039  | 0.271781 | 0.382568 |
| SNHG9     | 16p13. 3  | -0.08255393  | 0.271927 | 0.382747 |

|          |           |              |          |          |
|----------|-----------|--------------|----------|----------|
| TMEM161B | 5q14.3    | 0.082509991  | 0.272183 | 0.383081 |
| AADACL2  | 3q25.1    | 0.082499939  | 0.272242 | 0.383136 |
| VWDE     | 7p21.3    | -0.082491332 | 0.272292 | 0.38318  |
| TRIM41   | 5q35.3    | 0.082478606  | 0.272367 | 0.383257 |
| DTX1     | 12q24.13  | 0.082459774  | 0.272476 | 0.383375 |
| IFT22    | 7q22.1    | -0.082457682 | 0.272489 | 0.383375 |
| GAGE4    | Xp11.4-p1 | -0.082439291 | 0.272596 | 0.383477 |
| MYMK     | 9q34.2    | -0.082438738 | 0.272599 | 0.383477 |
| TUBA3D   | 2q21.1    | -0.082428464 | 0.272659 | 0.383534 |
| MCAT     | 22q13.2   | 0.082422112  | 0.272696 | 0.383559 |
| SKI      | 1p36.33-f | -0.082417927 | 0.272721 | 0.383567 |
| RND1     | 12q13.12  | 0.082407466  | 0.272782 | 0.383626 |
| COL4A4   | 2q36.3    | -0.082388634 | 0.272892 | 0.383753 |
| ARMCX5   | Xq22.1    | -0.082371895 | 0.272989 | 0.383854 |
| RNASEL   | 1q25.3    | 0.082369803  | 0.273002 | 0.383854 |
| PPF1BP2  | 11p15.4   | 0.082353064  | 0.2731   | 0.383965 |
| OR5AU1   | 14q11.2   | -0.082342456 | 0.273162 | 0.384025 |
| SDR39U1  | 14q12     | -0.082309125 | 0.273356 | 0.384272 |
| APOM     | 6p21.33   | 0.082277739  | 0.27354  | 0.384503 |
| TSPAN32  | 11p15.5   | -0.082258908 | 0.27365  | 0.38463  |
| GYPA     | 4q31.21   | -0.082245615 | 0.273728 | 0.384713 |
| BMP7     | 20q13.31  | 0.082231708  | 0.273809 | 0.38479  |
| BTN2A3P  | 6p22.2    | 0.082229658  | 0.273821 | 0.38479  |
| GOLGA8A  | 15q14     | 0.082214969  | 0.273907 | 0.384884 |
| PKIA     | 8q21.13   | 0.082191953  | 0.274042 | 0.385046 |
| COPS7A   | 12p13.31  | 0.082171029  | 0.274165 | 0.385191 |
| FLNC     | 7q32.1    | 0.082150106  | 0.274287 | 0.385336 |
| LUZP6    | 7q33      | -0.082122905 | 0.274447 | 0.385533 |
| ACADL    | 2q34      | -0.082106623 | 0.274542 | 0.38564  |
| MYO7A    | 11q13.5   | 0.082087335  | 0.274655 | 0.385772 |
| TFR2     | 7q22.1    | 0.082081058  | 0.274692 | 0.385797 |
| PRPF38B  | 1p13.3    | -0.082062227 | 0.274803 | 0.38592  |
| MT1X     | 16q13     | -0.082058042 | 0.274827 | 0.38592  |
| RPS19BP1 | 22q13.1   | 0.082053857  | 0.274852 | 0.38592  |
| PCDHB2   | 5q31.3    | 0.082050762  | 0.27487  | 0.38592  |
| BLNK     | 10q24.1   | 0.082049673  | 0.274876 | 0.38592  |
| IL18BP   | 11q13.4   | -0.082045488 | 0.274901 | 0.385927 |
| EIF5AL1  | 10q22.3   | 0.082035026  | 0.274962 | 0.385986 |
| PPFIA1   | 11q13.3   | 0.082026657  | 0.275012 | 0.386028 |
| SMAP1    | 6q13      | -0.082022472 | 0.275036 | 0.386036 |
| PDHA1    | Xp22.12   | -0.082009918 | 0.27511  | 0.386112 |
| ZFP62    | 5q35.3    | 0.082001548  | 0.275159 | 0.386154 |
| AVPR2    | Xq28      | -0.081982717 | 0.27527  | 0.386282 |
| TTC38    | 22q13.31  | 0.081974348  | 0.275319 | 0.386324 |
| RBM7     | 11q23.2   | -0.081965978 | 0.275368 | 0.386356 |
| IZUMO4   | 19p13.3   | 0.081963886  | 0.27538  | 0.386356 |
| KCNIP3   | 2q11.1    | -0.081938778 | 0.275528 | 0.386536 |
| EPHA7    | 6q16.1    | -0.081915144 | 0.275667 | 0.386704 |
| YEATS2   | 3q27.1    | 0.081878099  | 0.275885 | 0.386982 |
| FBXO44   | 1p36.22   | -0.081867638 | 0.275946 | 0.387004 |
| FAM166A  | 9q34.3    | -0.081866714 | 0.275952 | 0.387004 |
| C12ORF43 | 12q24.31  | -0.081865588 | 0.275958 | 0.387004 |
| NXNL1    | 19p13.11  | -0.081828241 | 0.276178 | 0.387261 |
| SNAP47   | 1q42.13   | -0.081827883 | 0.27618  | 0.387261 |



|           |          |              |          |          |
|-----------|----------|--------------|----------|----------|
| PCDHGC4   | 5q31.3   | -0.081803725 | 0.276323 | 0.387414 |
| ZNF502    | 3p21.31  | -0.081802774 | 0.276328 | 0.387414 |
| DNAJC10   | 2q32.1   | -0.08179859  | 0.276353 | 0.387421 |
| C15ORF56  | 15q15.1  | -0.081790306 | 0.276402 | 0.387436 |
| KATNB1    | 16q21    | 0.08179022   | 0.276402 | 0.387436 |
| HCG27     | 6p21.33  | 0.081762059  | 0.276568 | 0.387642 |
| FSCB      | 14q21.2  | 0.081743396  | 0.276678 | 0.387769 |
| EAF2      | 3q13.33  | -0.081735819 | 0.276723 | 0.387804 |
| KIN       | 10p14    | 0.081721173  | 0.276809 | 0.387876 |
| CLECL1    | 12p13.31 | -0.081720554 | 0.276813 | 0.387876 |
| SOX7      | 8p23.1   | 0.081652125  | 0.277217 | 0.388414 |
| LRRC43    | 12q24.31 | -0.081614676 | 0.277438 | 0.388697 |
| NUDCD2    | 5q34     | -0.081574708 | 0.277674 | 0.388991 |
| OR12D3    | 6p22.1   | -0.081569903 | 0.277702 | 0.388991 |
| KCNH5     | 14q23.2  | -0.081569261 | 0.277706 | 0.388991 |
| KRTAP4-12 | 17q21.2  | -0.081553397 | 0.2778   | 0.389095 |
| LOC284441 | 11p12    | -0.081549599 | 0.277822 | 0.389099 |
| TP53AIP1  | 11q24.3  | 0.081542721  | 0.277863 | 0.389129 |
| CTU1      | 19q13.41 | 0.081524491  | 0.277971 | 0.389253 |
| TOM1L1    | 17q22    | 0.081511937  | 0.278045 | 0.389329 |
| TOLLIP    | 11p15.5  | -0.08147009  | 0.278293 | 0.389649 |
| APC2      | 19p13.3  | -0.081432427 | 0.278516 | 0.389934 |
| TET3      | 2p13.1   | 0.081419873  | 0.27859  | 0.39001  |
| MAML2     | 11q21    | -0.081382211 | 0.278813 | 0.390293 |
| CZIB      | 1p32.3   | 0.081378026  | 0.278838 | 0.390293 |
| IMPA1     | 8q21.13  | -0.081375934 | 0.27885  | 0.390293 |
| CEP44     | 4q34.1   | -0.081323625 | 0.279161 | 0.3907   |
| ARHGAP18  | 6q22.33  | -0.081311071 | 0.279235 | 0.390777 |
| ELFN1     | 7p22.3   | -0.081306886 | 0.27926  | 0.390784 |
| MKS1      | 17q22    | -0.081290147 | 0.279359 | 0.390896 |
| PCNAP1    | 4q23     | -0.081245261 | 0.279626 | 0.391224 |
| FATE1     | Xq28     | 0.081244064  | 0.279633 | 0.391224 |
| SLC6A1    | 3p25.3   | 0.081195991  | 0.279918 | 0.391596 |
| REM2      | 14q11.2  | -0.081179295 | 0.280018 | 0.391707 |
| LOC284788 | 20p11.21 | -0.081109703 | 0.280431 | 0.392259 |
| UBE2NL    | Xq27.3   | -0.081091597 | 0.280539 | 0.392382 |
| MSTN      | 2q32.2   | -0.081087514 | 0.280563 | 0.392388 |
| NDUFS7    | 19p13.3  | 0.081064173  | 0.280702 | 0.392555 |
| SLC22A24  | 11q12.3  | -0.081056292 | 0.280749 | 0.39256  |
| NUP62     | 19q13.33 | 0.081053711  | 0.280765 | 0.39256  |
| SURF1     | 9q34.2   | 0.081053711  | 0.280765 | 0.39256  |
| LINC01119 | 2p21     | -0.081036972 | 0.280864 | 0.392672 |
| CELA2B    | 1p36.21  | -0.081028193 | 0.280917 | 0.392704 |
| TXNL4B    | 16q22.2  | -0.08102651  | 0.280927 | 0.392704 |
| NTS       | 12q21.31 | -0.081016662 | 0.280985 | 0.392758 |
| ANKRD23   | 2q11.2   | -0.08101086  | 0.28102  | 0.392761 |
| ARHGAP5   | 14q12    | -0.081009771 | 0.281026 | 0.392761 |
| TRIB3     | 20p13    | -0.080988848 | 0.281151 | 0.392908 |
| CHADL     | 22q13.2  | 0.080967924  | 0.281276 | 0.392973 |
| UOX       | 1p31.1   | -0.080966436 | 0.281285 | 0.392973 |
| ABHD17A   | 19p13.3  | 0.080965832  | 0.281288 | 0.392973 |
| GM2A      | 5q33.1   | -0.080965832 | 0.281288 | 0.392973 |
| DKKL1     | 19q13.33 | -0.08096455  | 0.281296 | 0.392973 |
| C16ORF87  | 16q11.2  | 0.080944908  | 0.281413 | 0.393109 |

|           |           |              |          |          |
|-----------|-----------|--------------|----------|----------|
| GPX5      | 6p22.1    | -0.080932728 | 0.281486 | 0.393183 |
| TMEM14A   | 6p12.2    | -0.080913523 | 0.2816   | 0.393305 |
| CCZ1P-OR7 | 7q21.3    | 0.080911431  | 0.281613 | 0.393305 |
| ERCC3     | 2q14.3    | 0.080873768  | 0.281837 | 0.393592 |
| MRPL30    | 2q11.2    | 0.080827736  | 0.282112 | 0.393948 |
| DNAL4     | 22q13.1   | 0.080815182  | 0.282187 | 0.394025 |
| ANO4      | 12q23.1   | 0.08080472   | 0.28225  | 0.394085 |
| TMEM202   | 15q23-q24 | -0.08078888  | 0.282345 | 0.39419  |
| BTBD18    | 11q12.1   | -0.080774951 | 0.282428 | 0.394278 |
| ATN1      | 12p13.31  | -0.080756596 | 0.282538 | 0.394395 |
| ASNA1     | 19p13.13  | 0.0807535    | 0.282556 | 0.394395 |
| TIMD4     | 5q33.3    | -0.080751049 | 0.282571 | 0.394395 |
| SNORA14B  | 1q42.3    | -0.080736108 | 0.28266  | 0.394492 |
| ESCO1     | 18q11.2   | 0.080725211  | 0.282725 | 0.394523 |
| HIST1H4A  | 6p22.2    | -0.080722581 | 0.282741 | 0.394523 |
| TPSG1     | 16p13.3   | -0.080722537 | 0.282741 | 0.394523 |
| KIAA2013  | 1p36.22   | 0.080672902  | 0.283038 | 0.39491  |
| FLJ44635  | Xq13.1    | -0.080665621 | 0.283082 | 0.394943 |
| BARHL2    | 1p22.2    | -0.080650238 | 0.283174 | 0.395044 |
| GRID1     | 10q23.1-c | -0.080645701 | 0.283201 | 0.395055 |
| GPR17     | 2q14.3    | -0.080599669 | 0.283477 | 0.395412 |
| KLHDC8B   | 3p21.31   | -0.0805913   | 0.283527 | 0.395454 |
| CSPG4     | 15q24.2   | 0.080576653  | 0.283615 | 0.395521 |
| ERICH5    | 8q22.2    | 0.080576653  | 0.283615 | 0.395521 |
| TGDS      | 13q32.1   | 0.080570376  | 0.283653 | 0.395526 |
| ODF3      | 11p15.5   | 0.080569462  | 0.283658 | 0.395526 |
| SLC35F4   | 14q22.3-c | -0.080531404 | 0.283886 | 0.395817 |
| GUCY2D    | 17p13.1   | 0.080516872  | 0.283973 | 0.395891 |
| PGD       | 1p36.22   | 0.080515975  | 0.283979 | 0.395891 |
| REG1CP    | 2p12      | -0.080486018 | 0.284159 | 0.396114 |
| RPS6      | 9p22.1    | -0.08047622  | 0.284217 | 0.396168 |
| LGALS1    | 2p14      | 0.080463666  | 0.284293 | 0.396245 |
| PWWP3B    | Xq22.3    | -0.080435215 | 0.284464 | 0.396456 |
| FAM238B   | 10p12.1   | 0.08041466   | 0.284587 | 0.3966   |
| COX4I2    | 20q11.21  | -0.080382064 | 0.284783 | 0.396818 |
| STAT2     | 12q13.3   | 0.080382064  | 0.284783 | 0.396818 |
| PRAM1     | 19p13.2   | 0.080361141  | 0.284909 | 0.396966 |
| ABRAXAS2  | 10q26.13  | -0.080344402 | 0.28501  | 0.397076 |
| TMEM156   | 4p14      | -0.080340217 | 0.285035 | 0.397076 |
| ADAM33    | 20p13     | -0.080338125 | 0.285047 | 0.397076 |
| LUC7L     | 16p13.3   | 0.080329755  | 0.285098 | 0.397118 |
| KHDC1L    | 6q13      | -0.080322554 | 0.285141 | 0.397133 |
| MZF1-AS1  | 19q13.43  | 0.080321386  | 0.285148 | 0.397133 |
| SMN1      | 5q13.2    | -0.080296756 | 0.285296 | 0.397312 |
| STAG3L4   | 7q11.21   | -0.080271169 | 0.28545  | 0.397498 |
| NMUR1     | 2q37.1    | -0.080256523 | 0.285538 | 0.397583 |
| RPS28     | 19p13.2   | 0.080254431  | 0.285551 | 0.397583 |
| TIA1      | 2p13.3    | 0.080237692  | 0.285652 | 0.397696 |
| PKD2L2    | 5q31.2    | 0.080232072  | 0.285686 | 0.397715 |
| CRLF1     | 19p13.11  | 0.080220953  | 0.285753 | 0.397781 |
| CIDEB     | 14q12     | -0.080195845 | 0.285904 | 0.397964 |
| CD86      | 3q13.33   | -0.080164459 | 0.286093 | 0.398199 |
| UNC5CL    | 6p21.1    | 0.080133074  | 0.286282 | 0.398435 |
| CRYL1     | 13q12.11  | 0.080116335  | 0.286383 | 0.398548 |

|            |            |              |          |          |
|------------|------------|--------------|----------|----------|
| PPP4R3B    | 2p16.1     | -0.080099596 | 0.286485 | 0.398649 |
| NUTM2A-AS1 | 10q23.2    | -0.080097504 | 0.286497 | 0.398649 |
| RNF133     | 7q31.32    | -0.080091982 | 0.28653  | 0.398649 |
| LINC01226  | 1p35.2     | 0.080091036  | 0.286536 | 0.398649 |
| ITGA2B     | 17q21.31   | -0.080068253 | 0.286674 | 0.398813 |
| ANKRD54    | 22q13.1    | -0.080059841 | 0.286725 | 0.398856 |
| NCF2       | 1q25.3     | 0.080003348  | 0.287066 | 0.399265 |
| SEMA5B     | 3q21.1     | -0.080003348 | 0.287066 | 0.399265 |
| BMPR2      | 2q33.1-q34 | -0.080001255 | 0.287078 | 0.399265 |
| PIK3CB     | 3q22.3     | 0.079982424  | 0.287192 | 0.399396 |
| RSL24D1    | 15q21.3    | -0.079953131 | 0.287369 | 0.399614 |
| FOXN3-AS2  | 14q32.11   | -0.079925898 | 0.287534 | 0.399815 |
| OR4D5      | 11q24.1    | -0.079906055 | 0.287654 | 0.399954 |
| HAP1       | 17q21.2    | -0.079877806 | 0.287825 | 0.400164 |
| GRXCR2     | 5q32       | -0.079867852 | 0.287885 | 0.400197 |
| LINC01184  | 5q23.3     | -0.079867345 | 0.287889 | 0.400197 |
| SNORA38    | 6p21.33    | -0.079842386 | 0.28804  | 0.400379 |
| TERT       | 5p15.33    | 0.079799964  | 0.288297 | 0.400708 |
| RAB22A     | 20q13.32   | 0.079796204  | 0.28832  | 0.400712 |
| ADH5       | 4q23       | -0.07978365  | 0.288396 | 0.400742 |
| KRTAP12-4  | 21q22.3    | 0.079780556  | 0.288414 | 0.400742 |
| OR10K1     | 1q23.1     | 0.079780556  | 0.288414 | 0.400742 |
| THBS3      | 1q22       | 0.079779466  | 0.288421 | 0.400742 |
| ACP1       | 2p25.3     | 0.079769004  | 0.288484 | 0.400802 |
| CCDC167    | 6p21.2     | 0.07975645   | 0.288561 | 0.40088  |
| FGFR4      | 5q35.2     | 0.079741803  | 0.288649 | 0.400976 |
| NOX3       | 6q25.3     | 0.07973466   | 0.288693 | 0.40099  |
| DUSP3      | 17q21.31   | -0.079733434 | 0.2887   | 0.40099  |
| CYP1A1     | 15q24.1    | -0.079707701 | 0.288856 | 0.401179 |
| CX3CL1     | 16q21      | 0.079704141  | 0.288878 | 0.401181 |
| FNTA       | 8p11.21    | 0.079697864  | 0.288916 | 0.401206 |
| NRGN       | 11q24.2    | -0.079653924 | 0.289183 | 0.401549 |
| CASP7      | 10q25.3    | 0.079628816  | 0.289335 | 0.401733 |
| ATXN2      | 12q24.12   | -0.079595338 | 0.289539 | 0.401988 |
| ATP10A     | 15q12      | 0.079589061  | 0.289577 | 0.402013 |
| IVNS1ABP   | 1q25.3     | 0.079572322  | 0.289679 | 0.402126 |
| ABRACL     | 6q24.1     | 0.079563953  | 0.28973  | 0.402169 |
| TCEA1      | 8q11.23    | -0.079540937 | 0.28987  | 0.402335 |
| CEPT1      | 1p13.3     | 0.079513736  | 0.290035 | 0.402537 |
| PHF1       | 6p21.32    | 0.079509552  | 0.290061 | 0.402544 |
| LINC00635  | 3q13.12    | -0.079491928 | 0.290168 | 0.402665 |
| PAFAH2     | 1p36.11    | 0.079453058  | 0.290405 | 0.402966 |
| ADAMTSL2   | 9q34.2     | -0.079444689 | 0.290455 | 0.403008 |
| MITF       | 3p13       | 0.079432134  | 0.290532 | 0.403086 |
| UBL4B      | 1p13.3     | 0.0794165    | 0.290627 | 0.403191 |
| TIPARP     | 3q25.31    | 0.079411211  | 0.290659 | 0.403207 |
| FZD1       | 7q21.13    | -0.079365179 | 0.29094  | 0.403569 |
| TTY14      | Yq11.222   | -0.079358066 | 0.290983 | 0.403601 |
| GSTA1      | 6p12.2     | 0.079349528  | 0.291036 | 0.403645 |
| CYB561     | 17q23.3    | 0.07931287   | 0.291259 | 0.403927 |
| GALR3      | 22q13.1    | -0.079302013 | 0.291325 | 0.403977 |
| C7ORF25    | 7p14.1     | -0.079300316 | 0.291336 | 0.403977 |
| LRPPRC     | 2p21       | -0.079262654 | 0.291566 | 0.404268 |
| C1D        | 2p14       | -0.079248007 | 0.291655 | 0.404364 |

|            |              |              |          |          |
|------------|--------------|--------------|----------|----------|
| PIGG       | 4p16.3       | 0.079237545  | 0.291719 | 0.404414 |
| RIOX1      | 14q24.3      | -0.079235453 | 0.291732 | 0.404414 |
| HNRNPA3P1  | 10q11.21     | 0.079174816  | 0.292102 | 0.4049   |
| DGKD       | 2q37.1       | -0.079158036 | 0.292205 | 0.405014 |
| PRPSAP1    | 17q25.1      | -0.07912665  | 0.292397 | 0.405225 |
| TMPRSS12   | 12q13.12     | -0.079126543 | 0.292398 | 0.405225 |
| SLC41A3    | 3q21.2-q22.1 | 0.079116189  | 0.292461 | 0.405285 |
| CES5A      | 16q12.2      | -0.079082938 | 0.292665 | 0.405539 |
| DMRTC2     | 19q13.2      | -0.079073307 | 0.292724 | 0.405592 |
| DCAF8L2    | Xp21.3       | -0.079066664 | 0.292764 | 0.405615 |
| LOC153910  | 6q24.2       | 0.079063924  | 0.292781 | 0.405615 |
| LOC284798  | 20p11.21     | -0.078996952 | 0.293191 | 0.406156 |
| FAM157A    | 3q29         | -0.078986462 | 0.293256 | 0.406217 |
| LCT        | 2q21.3       | -0.07897073  | 0.293352 | 0.406322 |
| DCD        | 12q13.2      | -0.078964665 | 0.293389 | 0.406346 |
| BAZ2B      | 2q24.2       | -0.078957169 | 0.293435 | 0.406381 |
| NAA50      | 3q13.31      | 0.078915322  | 0.293692 | 0.406708 |
| GUCY2EP    | 11q13.5      | 0.078894592  | 0.293819 | 0.406856 |
| C8ORF44    | 8q13.1       | 0.07887766   | 0.293923 | 0.406972 |
| NANOG      | 12p13.31     | 0.078851017  | 0.294087 | 0.40717  |
| PNPLA5     | 22q13.31     | -0.078829223 | 0.294221 | 0.407328 |
| RAD21L1    | 20p13        | -0.078823203 | 0.294258 | 0.407351 |
| PHKB       | 16q12.1      | -0.07880652  | 0.29436  | 0.407464 |
| SLC25A3P1  | 1p32.3       | -0.078796384 | 0.294422 | 0.407522 |
| UBE2K      | 4p14         | -0.078789781 | 0.294463 | 0.40755  |
| LNX1       | 4q12         | -0.07876258  | 0.29463  | 0.407753 |
| CCDC105    | 19p13.12     | -0.078725045 | 0.294861 | 0.408045 |
| PPIF       | 10q22.3      | -0.078720733 | 0.294888 | 0.40805  |
| ST20       | 15q25.1      | 0.078716548  | 0.294913 | 0.40805  |
| MRPL35     | 2p11.2       | -0.078714456 | 0.294926 | 0.40805  |
| CCDC138    | 2q13         | 0.078706087  | 0.294978 | 0.408093 |
| CAMK1G     | 1q32.2       | -0.078697717 | 0.295029 | 0.408136 |
| CD19       | 16p11.2      | -0.078670851 | 0.295195 | 0.408337 |
| DCUN1D4    | 4q12         | -0.078662147 | 0.295248 | 0.408383 |
| ZNF841     | 19q13.41     | 0.078641224  | 0.295377 | 0.408533 |
| MPIG6B     | 6p21.33      | -0.078623451 | 0.295487 | 0.408656 |
| PTPRCAP    | 11q13.2      | -0.07858473  | 0.295725 | 0.408934 |
| OR1C1      | 1q44         | -0.078584141 | 0.295729 | 0.408934 |
| LDLRAD1    | 1p32.3       | 0.078547875  | 0.295953 | 0.409215 |
| FN1        | 2q35         | 0.078542883  | 0.295983 | 0.409229 |
| SPATA31D5  | 9q21.32      | -0.078531424 | 0.296054 | 0.409299 |
| COX11      | 17q22        | -0.078507313 | 0.296203 | 0.409476 |
| SPINK14    | 5q32         | -0.078483731 | 0.296348 | 0.409649 |
| TBC1D10C   | 11q13.2      | -0.07846965  | 0.296435 | 0.409741 |
| ZNF503-AS1 | 10q22.2      | -0.078450819 | 0.296552 | 0.409873 |
| DPEP1      | 16q24.3      | -0.078440357 | 0.296616 | 0.409934 |
| KCNE1      | 21q22.12     | -0.078419823 | 0.296743 | 0.410081 |
| RNF151     | 16p13.3      | -0.078416053 | 0.296766 | 0.410085 |
| IGLL3P     | 22q11.23     | -0.078408373 | 0.296814 | 0.410104 |
| CYCSP52    | 1q23.1       | -0.078407153 | 0.296821 | 0.410104 |
| CRYGA      | 2q33.3       | 0.07833      | 0.297298 | 0.410735 |
| H1FX-AS1   | 3q21.3       | -0.078314816 | 0.297392 | 0.410815 |
| HID1       | 17q25.1      | 0.078312724  | 0.297405 | 0.410815 |
| TTC13      | 1q42.2       | -0.078310631 | 0.297418 | 0.410815 |

|           |          |              |          |          |
|-----------|----------|--------------|----------|----------|
| PICK1     | 22q13.1  | 0.078281338  | 0.2976   | 0.411037 |
| HIST1H2BI | 6p22.1   | 0.078263079  | 0.297713 | 0.411165 |
| RSF1      | 11q14.1  | -0.078247861 | 0.297807 | 0.411267 |
| LINC01126 | 2p21     | -0.078235306 | 0.297885 | 0.411343 |
| IL36A     | 2q14.1   | 0.078232363  | 0.297903 | 0.411343 |
| GDAP2     | 1p12     | 0.07822066   | 0.297975 | 0.411414 |
| CCDC106   | 19q13.42 | -0.078189275 | 0.29817  | 0.411654 |
| LIPE      | 19q13.2  | -0.078172536 | 0.298274 | 0.411769 |
| LINC02347 | 12q24.32 | -0.07816105  | 0.298345 | 0.411818 |
| COL4A3    | 2q36.3   | -0.078160145 | 0.29835  | 0.411818 |
| CIAO2A    | 15q22.31 | -0.078124412 | 0.298572 | 0.412096 |
| GAPDHS    | 19q13.12 | -0.078118008 | 0.298612 | 0.412122 |
| NUMBL     | 19q13.2  | 0.07811395   | 0.298637 | 0.412129 |
| PNLIP     | 10q25.3  | -0.078103355 | 0.298703 | 0.412191 |
| NFYC-AS1  | 1p34.2   | -0.078090934 | 0.29878  | 0.412237 |
| RARRES1   | 3q25.32  | -0.078090934 | 0.29878  | 0.412237 |
| SPCS2     | 11q13.4  | -0.078086749 | 0.298806 | 0.412237 |
| NECTIN3   | 3q13.13  | 0.078084657  | 0.298819 | 0.412237 |
| BMS1P1    | 10q11.22 | 0.07807838   | 0.298858 | 0.412262 |
| DCTN3     | 9p13.3   | -0.078063733 | 0.298949 | 0.412331 |
| DOK3      | 5q35.3   | -0.078063733 | 0.298949 | 0.412331 |
| TMEM200A  | 6q23.1   | -0.078055364 | 0.299001 | 0.412374 |
| SNORA61   | 1p35.3   | -0.078025655 | 0.299185 | 0.4126   |
| SCARNA18  | 5q14.2   | -0.077986914 | 0.299426 | 0.412904 |
| OLAH      | 10p13    | -0.077965494 | 0.299559 | 0.413031 |
| VAX2      | 2p13.3   | 0.077965392  | 0.29956  | 0.413031 |
| IFIT5     | 10q23.31 | -0.077948654 | 0.299664 | 0.413146 |
| BTN3A2    | 6p22.2   | -0.077938192 | 0.299729 | 0.413197 |
| POLR2J2   | 7q22.1   | -0.077936099 | 0.299742 | 0.413197 |
| POGLUT2   | 13q33.1  | -0.077908899 | 0.299911 | 0.413402 |
| CTPS2     | Xp22.2   | 0.077904714  | 0.299937 | 0.413409 |
| PPP1R9B   | 17q21.33 | -0.077871236 | 0.300145 | 0.413668 |
| WIPI1     | 17q24.2  | -0.077841943 | 0.300328 | 0.41389  |
| OR7D4     | 19p13.2  | -0.077830292 | 0.3004   | 0.413962 |
| C1QTNF2   | 5q33.3   | -0.077810558 | 0.300523 | 0.414103 |
| LMNB1     | 5q23.2   | 0.077751972  | 0.300889 | 0.414567 |
| SLC34A3   | 9q34.3   | 0.07774988   | 0.300902 | 0.414567 |
| SLC30A8   | 8q24.11  | -0.077722863 | 0.30107  | 0.41477  |
| CDK20     | 9q22.1   | -0.077701755 | 0.301202 | 0.414923 |
| SPTLC2    | 14q24.3  | 0.077655724  | 0.301489 | 0.415262 |
| ARSH      | Xp22.33  | 0.077655642  | 0.30149  | 0.415262 |
| ATP6AP1L  | 5q14.2   | 0.077638985  | 0.301594 | 0.415377 |
| SLC2A14   | 12p13.31 | -0.077630615 | 0.301646 | 0.415421 |
| ASIC1     | 12q13.12 | -0.077624338 | 0.301685 | 0.415446 |
| CDK3      | 17q25.1  | 0.077584584  | 0.301934 | 0.415759 |
| SURF6     | 9q34.2   | 0.077559475  | 0.302091 | 0.415947 |
| ALDH3A2   | 17p11.2  | -0.077542736 | 0.302195 | 0.416034 |
| HIGD1B    | 17q21.31 | -0.077542736 | 0.302195 | 0.416034 |
| OR5M11    | 11q12.1  | 0.07751957   | 0.30234  | 0.416204 |
| OR1N2     | 9q33.2   | -0.077504532 | 0.302434 | 0.416305 |
| LIPA      | 10q23.31 | -0.077477873 | 0.302601 | 0.416506 |
| TCL1B     | 14q32.13 | -0.077474349 | 0.302623 | 0.416508 |
| CCDC57    | 17q25.3  | 0.077454857  | 0.302745 | 0.416583 |
| PMCHL2    | 5q13.2   | -0.077454635 | 0.302746 | 0.416583 |

|          |           |              |          |          |
|----------|-----------|--------------|----------|----------|
| SRSF10   | 1p36. 11  | -0.077450673 | 0.302771 | 0.416583 |
| SLC22A6  | 11q12. 3  | -0.077448103 | 0.302787 | 0.416583 |
| EGFL8    | 6p21. 32  | 0.077444396  | 0.302811 | 0.416583 |
| TDH      | 8p23. 1   | -0.077442461 | 0.302823 | 0.416583 |
| PXMP4    | 20q11. 22 | -0.077442303 | 0.302824 | 0.416583 |
| TMEM97   | 17q11. 2  | 0.077410918  | 0.30302  | 0.416825 |
| VAMP1    | 12p13. 31 | -0.077389994 | 0.303151 | 0.416966 |
| RREB1    | 6p24. 3   | 0.077387902  | 0.303164 | 0.416966 |
| MPZL1    | 1q24. 2   | 0.077379533  | 0.303217 | 0.417009 |
| FCER1A   | 1q23. 2   | -0.077348147 | 0.303414 | 0.417251 |
| CXCR5    | 11q23. 3  | -0.077331408 | 0.303519 | 0.417364 |
| USP17L9P | 4p16. 1   | -0.077326029 | 0.303552 | 0.417364 |
| ROGDI    | 16p13. 3  | 0.077325131  | 0.303558 | 0.417364 |
| DAZ2     | Yq11. 223 | -0.077309285 | 0.303657 | 0.417472 |
| KRT84    | 12q13. 13 | 0.077295991  | 0.303741 | 0.417557 |
| NBPF15   | 1q21. 1   | 0.077274915  | 0.303873 | 0.417711 |
| WDR73    | 15q25. 2  | -0.077266545 | 0.303926 | 0.417754 |
| AMT      | 3p21. 31  | 0.077260268  | 0.303965 | 0.417779 |
| NCOR2    | 12q24. 31 | 0.077224698  | 0.304188 | 0.418058 |
| PRR35    | 16p13. 3  | -0.077171379 | 0.304523 | 0.418489 |
| ABCB6    | 2q35      | -0.077147281 | 0.304675 | 0.418669 |
| OR1E2    | 17p13. 2  | 0.07713783   | 0.304734 | 0.418722 |
| HJV      | 1q21. 1   | 0.077123364  | 0.304825 | 0.418818 |
| COG1     | 17q25. 1  | -0.077086603 | 0.305057 | 0.419085 |
| MAG      | 19q13. 12 | -0.077084526 | 0.30507  | 0.419085 |
| SBDSP1   | 7q11. 23  | -0.077082418 | 0.305083 | 0.419085 |
| FJX1     | 11p13     | 0.077076141  | 0.305122 | 0.419111 |
| GEMIN2   | 14q21. 1  | 0.077044756  | 0.30532  | 0.419353 |
| OVGP1    | 1p13. 2   | 0.077007093  | 0.305557 | 0.41965  |
| UPK1B    | 3q13. 32  | 0.076994902  | 0.305634 | 0.419727 |
| HMGB3P1  | 20q11. 22 | 0.076940706  | 0.305976 | 0.420157 |
| PNLIPRP3 | 10q25. 3  | -0.076938595 | 0.305989 | 0.420157 |
| HIST1H4F | 6p22. 2   | 0.076923727  | 0.306083 | 0.420256 |
| MRFAP1   | 4p16. 1   | -0.076898291 | 0.306243 | 0.420448 |
| FTMT     | 5q23. 1   | -0.076879445 | 0.306362 | 0.420582 |
| ZNF558   | 19p13. 2  | 0.076875275  | 0.306388 | 0.420589 |
| RIN3     | 14q32. 12 | 0.076860628  | 0.306481 | 0.420687 |
| CALCOCO1 | 12q13. 13 | -0.07683552  | 0.306639 | 0.420876 |
| TEDDM1   | 1q25. 3   | 0.076828111  | 0.306686 | 0.420911 |
| GALK1    | 17q25. 1  | 0.076818781  | 0.306745 | 0.420963 |
| COX16    | 14q24. 2  | 0.076743456  | 0.307221 | 0.421588 |
| ZW10     | 11q23. 2  | 0.07672881   | 0.307313 | 0.421686 |
| HBQ1     | 16p13. 3  | -0.07670145  | 0.307486 | 0.421894 |
| NCCRP1   | 19q13. 2  | 0.0766934    | 0.307537 | 0.421935 |
| OR2AE1   | 7q22. 1   | -0.076678516 | 0.307632 | 0.422013 |
| KIF12    | 9q32      | -0.076676501 | 0.307644 | 0.422013 |
| BRIX1    | 5p13. 2   | 0.076674408  | 0.307658 | 0.422013 |
| PPBPP2   | 4q13. 3   | 0.076669538  | 0.307688 | 0.422026 |
| FIS1     | 7q22. 1   | 0.076638838  | 0.307883 | 0.422264 |
| MAFA     | 8q24. 3   | 0.076628741  | 0.307947 | 0.422297 |
| MEIS3    | 19q13. 32 | -0.076628377 | 0.307949 | 0.422297 |
| GNA13    | 17q24. 1  | -0.076609545 | 0.308068 | 0.422431 |
| CSE1L    | 20q13. 13 | -0.076603268 | 0.308108 | 0.422457 |
| GPR22    | 7q22. 3   | -0.076576241 | 0.308279 | 0.422663 |

|          |          |              |          |          |
|----------|----------|--------------|----------|----------|
| ELMOD1   | 11q22.3  | -0.076567053 | 0.308337 | 0.422712 |
| ME3      | 11q14.2  | 0.076560415  | 0.308379 | 0.422712 |
| RAP1B    | 12q15    | -0.076557236 | 0.3084   | 0.422712 |
| TIPIN    | 15q22.31 | -0.076557236 | 0.3084   | 0.422712 |
| NUDT18   | 8p21.3   | 0.076553052  | 0.308426 | 0.422719 |
| GPR149   | 3q25.2   | -0.076547513 | 0.308461 | 0.422738 |
| CXCL9    | 4q21.1   | -0.076530036 | 0.308572 | 0.422861 |
| GRIA4    | 11q22.3  | -0.076517522 | 0.308651 | 0.42293  |
| MOSMO    | 16p12.2  | -0.076515389 | 0.308665 | 0.42293  |
| UBA3     | 3p14.1   | 0.07650702   | 0.308718 | 0.422974 |
| ST3GAL6  | 3q12.1   | -0.076500743 | 0.308758 | 0.423    |
| SLFN14   | 17q12    | -0.076493233 | 0.308805 | 0.423036 |
| TMPO-AS1 | 12q23.1  | -0.076484004 | 0.308864 | 0.423087 |
| GPC4     | Xq26.2   | 0.076477727  | 0.308904 | 0.423113 |
| CABLES2  | 20q13.33 | -0.076473542 | 0.30893  | 0.42312  |
| EME2     | 16p13.3  | 0.076465173  | 0.308983 | 0.423164 |
| INHBB    | 2q14.2   | 0.076444249  | 0.309116 | 0.423288 |
| TSR2     | Xp11.22  | -0.076444249 | 0.309116 | 0.423288 |
| FUBP1    | 1p31.1   | -0.076423326 | 0.309249 | 0.42344  |
| TYROBP   | 19q13.12 | 0.076412864  | 0.309315 | 0.423492 |
| WNT10B   | 12q13.12 | -0.076410771 | 0.309329 | 0.423492 |
| GFM1     | 3q25.32  | -0.076394033 | 0.309435 | 0.423608 |
| SNORA62  | 3p22.1   | 0.076380036  | 0.309524 | 0.423701 |
| ATP5MG   | 11q23.3  | 0.076339631  | 0.309781 | 0.424023 |
| POLG2    | 17q23.3  | 0.076310338  | 0.309967 | 0.424249 |
| AMELY    | Yp11.2   | -0.07630287  | 0.310014 | 0.424285 |
| CTHRC1   | 8q22.3   | 0.076297784  | 0.310047 | 0.424289 |
| ACTG1P4  | 1p21.1   | -0.076295692 | 0.31006  | 0.424289 |
| KRT2     | 12q13.13 | -0.076283141 | 0.31014  | 0.424352 |
| DLG1     | 3q29     | -0.076278953 | 0.310167 | 0.424352 |
| GPR52    | 1q25.1   | -0.076276312 | 0.310183 | 0.424352 |
| PFKFB1   | Xp11.21  | -0.076275119 | 0.310191 | 0.424352 |
| GPR157   | 1p36.22  | 0.076255937  | 0.310313 | 0.42449  |
| FAT1     | 4q35.2   | 0.076251752  | 0.31034  | 0.424498 |
| NADK     | 1p36.33  | 0.076218275  | 0.310553 | 0.42476  |
| VCX      | Xp22.31  | 0.076209168  | 0.310611 | 0.42481  |
| SLC10A5  | 8q21.13  | -0.076174335 | 0.310833 | 0.425078 |
| UNC13C   | 15q21.3  | 0.076171726  | 0.310849 | 0.425078 |
| MFSD6L   | 17p13.1  | -0.076151319 | 0.310979 | 0.425227 |
| ALOX5AP  | 13q12.3  | 0.076122026  | 0.311166 | 0.425395 |
| HLA-DQB2 | 6p21.32  | 0.076122026  | 0.311166 | 0.425395 |
| PDLIM3   | 4q35.1   | -0.076122026 | 0.311166 | 0.425395 |
| SPRYD7   | 13q14.2  | 0.076109472  | 0.311246 | 0.425453 |
| NP1PB13  | 16p11.2  | 0.076105493  | 0.311271 | 0.425453 |
| ERI2     | 16p12.3  | 0.076105287  | 0.311273 | 0.425453 |
| PRDM1    | 6q21     | -0.076059256 | 0.311566 | 0.425826 |
| POLL     | 10q24.32 | 0.076048794  | 0.311633 | 0.425888 |
| PGGT1B   | 5q22.3   | -0.076040424 | 0.311686 | 0.425921 |
| CMTR2    | 16q22.2  | -0.076038332 | 0.3117   | 0.425921 |
| TREML4   | 6p21.1   | 0.07600615   | 0.311905 | 0.426169 |
| C3ORF49  | 3p14.1   | -0.076003231 | 0.311924 | 0.426169 |
| SPP2     | 2q37.1   | 0.075972351  | 0.312121 | 0.426388 |
| LRRN4    | 20p12.3  | 0.075971377  | 0.312127 | 0.426388 |
| CSAG2    | Xq28     | 0.075952036  | 0.312251 | 0.426513 |

|           |            |               |           |           |
|-----------|------------|---------------|-----------|-----------|
| GOLGA6L1C | 15q25. 2   | 0. 075950453  | 0. 312261 | 0. 426513 |
| VAV2      | 9q34. 2    | 0. 075944176  | 0. 312301 | 0. 426538 |
| TAS1R1    | 1p36. 31   | 0. 075937794  | 0. 312342 | 0. 426565 |
| MEIS3P1   | 17p12      | -0. 075927437 | 0. 312408 | 0. 426626 |
| CD47      | 3q13. 12   | 0. 07592116   | 0. 312448 | 0. 426652 |
| CD7       | 17q25. 3   | -0. 075877221 | 0. 312729 | 0. 427006 |
| PLEKHF2   | 8q22. 1    | -0. 075866759 | 0. 312796 | 0. 427068 |
| CLDND2    | 19q13. 41  | -0. 075817628 | 0. 31311  | 0. 427468 |
| LIX1      | 5q15       | -0. 075774075 | 0. 313389 | 0. 42782  |
| NSUN2     | 5p15. 31   | 0. 075762141  | 0. 313466 | 0. 427895 |
| ANO6      | 12q12      | -0. 075751679 | 0. 313533 | 0. 427957 |
| PLCXD2    | 3q13. 2    | -0. 075701463 | 0. 313855 | 0. 428367 |
| C1QL2     | 2q14. 2    | -0. 075695248 | 0. 313894 | 0. 428382 |
| FZD8      | 10p11. 21  | -0. 075693093 | 0. 313908 | 0. 428382 |
| ZNF497    | 19q13. 43  | -0. 075680539 | 0. 313989 | 0. 428463 |
| GNLY      | 2p11. 2    | -0. 075647061 | 0. 314203 | 0. 428697 |
| M6PR      | 12p13. 31  | -0. 075647061 | 0. 314203 | 0. 428697 |
| TSPAN13   | 7p21. 1    | -0. 075621953 | 0. 314365 | 0. 428888 |
| KRT34     | 17q21. 2   | 0. 075607003  | 0. 31446  | 0. 428989 |
| ZGRF1     | 4q25       | -0. 075601029 | 0. 314499 | 0. 429012 |
| TEX101    | 19q13. 31  | -0. 075597202 | 0. 314523 | 0. 429017 |
| KCNK16    | 6p21. 2    | -0. 075592462 | 0. 314554 | 0. 429029 |
| PLAG1     | 8q12. 1    | 0. 075586383  | 0. 314593 | 0. 429053 |
| C6ORF226  | 6p21. 1    | 0. 075578014  | 0. 314647 | 0. 429097 |
| ATP5F1EP2 | 13q12. 2   | -0. 07555709  | 0. 314781 | 0. 429251 |
| MSR1      | 8p22       | -0. 075548721 | 0. 314835 | 0. 429295 |
| POU3F1    | 1p34. 3    | -0. 075542267 | 0. 314876 | 0. 429322 |
| MLIP      | 6p12. 1    | -0. 0755249   | 0. 314988 | 0. 429445 |
| OR51B2    | 11p15. 4   | 0. 075506857  | 0. 315104 | 0. 429574 |
| TIMP4     | 3p25. 2    | -0. 07545038  | 0. 315467 | 0. 430039 |
| SMARCD1   | 12q13. 12  | -0. 075444103 | 0. 315507 | 0. 430065 |
| C14ORF177 | 14q32. 2   | -0. 075428889 | 0. 315605 | 0. 43014  |
| OR51T1    | 11p15. 4   | -0. 075428889 | 0. 315605 | 0. 43014  |
| OR51E1    | 11p15. 4   | -0. 075412717 | 0. 315709 | 0. 430252 |
| CCL25     | 19p13. 2   | -0. 075379096 | 0. 315926 | 0. 430518 |
| CCL18     | 17q12      | 0. 075352039  | 0. 3161   | 0. 430726 |
| LOC728989 | 1q21. 1    | -0. 075301975 | 0. 316422 | 0. 431136 |
| NUCB1     | 19q13. 33  | -0. 075293453 | 0. 316477 | 0. 431181 |
| HESX1     | 3p14. 3    | 0. 075279892  | 0. 316565 | 0. 431271 |
| TSKS      | 19q13. 33  | 0. 075255903  | 0. 316719 | 0. 431453 |
| PRPF39    | 14q21. 2   | -0. 07522859  | 0. 316896 | 0. 431663 |
| VWA5A     | 11q24. 2   | 0. 075213943  | 0. 31699  | 0. 431762 |
| GK5       | 3q23       | 0. 075159542  | 0. 317341 | 0. 4322   |
| ASPN      | 9q22. 31   | -0. 07515745  | 0. 317355 | 0. 4322   |
| LIMD2     | 17q23. 3   | -0. 075153265 | 0. 317382 | 0. 432208 |
| PIWIL2    | 8p21. 3    | -0. 07512188  | 0. 317584 | 0. 432403 |
| DDX54     | 12q24. 13  | 0. 075119787  | 0. 317598 | 0. 432403 |
| EIF4E1B   | 5q35. 2    | -0. 075118452 | 0. 317607 | 0. 432403 |
| BRD7      | 16q12. 1   | 0. 075117695  | 0. 317612 | 0. 432403 |
| GCC2      | 2q12. 3    | -0. 075080033 | 0. 317855 | 0. 432704 |
| IGDCC3    | 15q22. 31  | 0. 075062888  | 0. 317966 | 0. 432811 |
| SYT17     | 16p12. 3   | 0. 075061201  | 0. 317977 | 0. 432811 |
| LOC145845 | 15q14      | 0. 07505608   | 0. 31801  | 0. 432827 |
| IFT122    | 3q21. 3-q2 | 0. 075048647  | 0. 318058 | 0. 432863 |



|          |           |              |          |          |
|----------|-----------|--------------|----------|----------|
| SVOPL    | 7q34      | 0.075040519  | 0.31811  | 0.432897 |
| MED24    | 17q21.1   | 0.075036093  | 0.318139 | 0.432897 |
| OR8A1    | 11q24.2   | -0.075034713 | 0.318148 | 0.432897 |
| CFAP58   | 10q25.1   | -0.075024324 | 0.318215 | 0.432959 |
| PPP1R12B | 1q32.1    | -0.075004708 | 0.318342 | 0.433102 |
| H2AFY2   | 10q22.1   | 0.074977507  | 0.318518 | 0.433312 |
| RPL34    | 4q25      | 0.074954491  | 0.318667 | 0.433485 |
| ADAMTS12 | 5p13.3-p1 | -0.074948214 | 0.318708 | 0.433511 |
| SF3B1    | 2q33.1    | 0.074893813  | 0.31906  | 0.433961 |
| MATN4    | 20q13.12  | 0.074878779  | 0.319158 | 0.434064 |
| TRA2A    | 7p15.3    | 0.074870797  | 0.319209 | 0.434105 |
| RGS21    | 1q31.2    | 0.074859094  | 0.319285 | 0.434178 |
| ZMYM6    | 1p34.3    | -0.074854058 | 0.319318 | 0.434193 |
| HDHD5    | 22q11.1   | -0.074831042 | 0.319467 | 0.434366 |
| A4GNT    | 3q22.3    | 0.074823185  | 0.319518 | 0.434406 |
| SMNDC1   | 10q25.2   | 0.074816396  | 0.319562 | 0.434437 |
| GPANK1   | 6p21.33   | -0.074810119 | 0.319603 | 0.434462 |
| GSG1L    | 16p12.1   | 0.074786646  | 0.319755 | 0.43464  |
| IGHMBP2  | 11q13.3   | 0.074776641  | 0.31982  | 0.434698 |
| OR13G1   | 1q44      | -0.074771235 | 0.319855 | 0.434717 |
| TULP2    | 19q13.33  | -0.074763532 | 0.319905 | 0.434755 |
| ACOT2    | 14q24.3   | -0.07474944  | 0.319997 | 0.43485  |
| TPK1     | 7q35      | -0.074734794 | 0.320092 | 0.434949 |
| SYNC     | 1p35.1    | 0.074728517  | 0.320132 | 0.434975 |
| RASA1    | 5q14.3    | 0.074709686  | 0.320255 | 0.435112 |
| CTDNEP1  | 17p13.1   | -0.074682485 | 0.320431 | 0.435322 |
| SEPTIN8  | 5q31.1    | 0.0746783    | 0.320459 | 0.43533  |
| POU2AF1  | 11q23.1   | -0.074655284 | 0.320608 | 0.435503 |
| CLEC4GP1 | 19p13.2   | -0.074623199 | 0.320817 | 0.435757 |
| MAP4K5   | 14q22.1   | -0.074617622 | 0.320853 | 0.435777 |
| FAM106C  | 17p11.2   | -0.074608634 | 0.320911 | 0.435826 |
| RPS29    | 14q21.3   | 0.074546482  | 0.321316 | 0.436326 |
| SPEM1    | 17p13.1   | -0.074545428 | 0.321323 | 0.436326 |
| SPAAR    | 9p13.3    | -0.074504635 | 0.321588 | 0.436657 |
| AMPD1    | 1p13.2    | -0.074498397 | 0.321629 | 0.436682 |
| F5       | 1q24.2    | -0.07445651  | 0.321902 | 0.437023 |
| ALAD     | 9q32      | 0.074441864  | 0.321997 | 0.437123 |
| C11ORF65 | 11q22.3   | -0.074434618 | 0.322045 | 0.437157 |
| GLOD4    | 17p13.3   | -0.074427217 | 0.322093 | 0.437193 |
| FNDC7    | 1p13.3    | -0.07441167  | 0.322194 | 0.437301 |
| GAGE12D  | Xp11.23   | -0.074383137 | 0.32238  | 0.437512 |
| TM7SF3   | 12p11.23  | -0.074381186 | 0.322393 | 0.437512 |
| CPN2     | 3q29      | 0.074360224  | 0.32253  | 0.437667 |
| PPHLN1   | 12q12     | 0.074347708  | 0.322612 | 0.437749 |
| RSPO2    | 8q23.1    | -0.074342326 | 0.322647 | 0.437766 |
| CEACAM4  | 19q13.2   | -0.074333061 | 0.322707 | 0.437789 |
| TPMT     | 6p22.3    | 0.074333061  | 0.322707 | 0.437789 |
| SNAPC3   | 9p22.3    | -0.074318415 | 0.322803 | 0.437889 |
| SNORD89  | 2q11.2    | 0.074313423  | 0.322835 | 0.437904 |
| ATP5MC1  | 17q21.32  | 0.074238905  | 0.323322 | 0.438501 |
| RCC1L    | 7q11.23   | 0.074234721  | 0.323349 | 0.438501 |
| SLC49A4  | 3q21.1    | 0.074232628  | 0.323363 | 0.438501 |
| OPN1LW   | Xq28      | -0.07423258  | 0.323363 | 0.438501 |
| ZNF160   | 19q13.41- | 0.074211705  | 0.3235   | 0.438656 |

|                    |                     |               |           |           |
|--------------------|---------------------|---------------|-----------|-----------|
| PDRG1              | 20q11. 21           | 0. 074201243  | 0. 323568 | 0. 438719 |
| HPRT1              | Xq26. 2-q $\dot{z}$ | 0. 07412801   | 0. 324047 | 0. 439339 |
| ASZ1               | 7q31. 2             | -0. 074124255 | 0. 324072 | 0. 439343 |
| LINC0110 $\dot{z}$ | 2q12. 1             | -0. 074110861 | 0. 32416  | 0. 439432 |
| KHDRBS1            | 1p35. 2             | 0. 074081979  | 0. 324349 | 0. 439658 |
| CUEDC1             | 17q22               | 0. 074050593  | 0. 324554 | 0. 439907 |
| HTR5A              | 7q36. 2             | -0. 07403979  | 0. 324625 | 0. 439973 |
| CSDC2              | 22q13. 2            | -0. 07402967  | 0. 324691 | 0. 440033 |
| DNAJC5G            | 2p23. 3             | -0. 074013811 | 0. 324795 | 0. 440144 |
| CFHR2              | 1q31. 3             | 0. 073986377  | 0. 324975 | 0. 440358 |
| LRRC69             | 8q21. 3             | 0. 073940472  | 0. 325276 | 0. 440736 |
| CRABP1             | 15q25. 1            | -0. 073918585 | 0. 32542  | 0. 440901 |
| SNTB1              | 8q24. 12            | 0. 073906221  | 0. 325501 | 0. 440981 |
| LOC10019 $\dot{z}$ | 18p11. 23           | -0. 073895929 | 0. 325569 | 0. 441043 |
| MYBPC1             | 12q23. 2            | 0. 073867183  | 0. 325757 | 0. 441263 |
| MAP4               | 3p21. 31            | 0. 073864373  | 0. 325776 | 0. 441263 |
| KCNJ14             | 19q13. 33           | 0. 073853912  | 0. 325845 | 0. 441327 |
| VAV1               | 19p13. 3            | 0. 073847635  | 0. 325886 | 0. 441353 |
| CLCNKA             | 1p36. 13            | -0. 073838644 | 0. 325945 | 0. 441376 |
| PAX4               | 7q32. 1             | 0. 073838298  | 0. 325947 | 0. 441376 |
| BICDL1             | 12q24. 23           | 0. 073830896  | 0. 325996 | 0. 441412 |
| PPIL2              | 22q11. 21           | -0. 07380788  | 0. 326147 | 0. 441587 |
| INMT               | 7p14. 3             | -0. 073801603 | 0. 326188 | 0. 441613 |
| ENTPD3             | 3p22. 1             | -0. 073761848 | 0. 32645  | 0. 441937 |
| WNT9A              | 1q42. 13            | -0. 07372837  | 0. 32667  | 0. 442205 |
| TBCA               | 5q14. 1             | 0. 073722093  | 0. 326711 | 0. 442231 |
| UNKL               | 16p13. 3            | -0. 073707447 | 0. 326808 | 0. 442319 |
| RBFOX3             | 17q25. 3            | -0. 073705439 | 0. 326821 | 0. 442319 |
| RBM22              | 5q33. 1             | -0. 073671915 | 0. 327042 | 0. 442574 |
| MAGEA10            | Xq28                | 0. 073670078  | 0. 327054 | 0. 442574 |
| RPS4Y1             | Yp11. 2             | -0. 073657838 | 0. 327134 | 0. 442653 |
| CSF2RA             | Xp22. 33 $\dot{z}$  | -0. 073615383 | 0. 327414 | 0. 443002 |
| ADAMTS4            | 1q23. 3             | -0. 073592367 | 0. 327566 | 0. 443177 |
| ZNF771             | 16p11. 2            | -0. 073588182 | 0. 327593 | 0. 443184 |
| HHLA1              | 8q24. 22            | -0. 073569303 | 0. 327718 | 0. 443323 |
| TSGA10IP           | 11q13. 1            | 0. 073552589  | 0. 327828 | 0. 443435 |
| F2                 | 11p11. 2            | -0. 073550002 | 0. 327845 | 0. 443435 |
| CDC7               | 1p22. 1             | -0. 073523319 | 0. 328021 | 0. 443643 |
| SPATA24            | 5q31. 2             | -0. 073487749 | 0. 328256 | 0. 44393  |
| RPS14              | 5q33. 1             | 0. 073483565  | 0. 328283 | 0. 443937 |
| THRB               | 3p24. 2             | -0. 073464733 | 0. 328407 | 0. 444076 |
| UBE2A              | Xq24                | 0. 073456364  | 0. 328463 | 0. 44412  |
| CSN3               | 4q13. 3             | -0. 073353085 | 0. 329145 | 0. 445013 |
| CIRBP-AS1          | 19p13. 3            | -0. 073343377 | 0. 329209 | 0. 445058 |
| PTPRO              | 12p12. 3 1          | -0. 073341284 | 0. 329223 | 0. 445058 |
| DECR1              | 8q21. 3             | 0. 073320361  | 0. 329362 | 0. 445204 |
| STXBP3             | 1p13. 3             | -0. 073318268 | 0. 329375 | 0. 445204 |
| SELENOV            | 19q13. 2            | -0. 073292029 | 0. 329549 | 0. 445408 |
| MTA3               | 2p21                | 0. 073278514  | 0. 329638 | 0. 445499 |
| AP3S1              | 5q22. 3-q $\dot{z}$ | 0. 073270144  | 0. 329694 | 0. 445539 |
| MINDY4             | 7p14. 3             | 0. 073265959  | 0. 329721 | 0. 445539 |
| KANSL1             | 17q21. 31           | -0. 073263867 | 0. 329735 | 0. 445539 |
| ATP12A             | 13q12. 12           | -0. 073245384 | 0. 329858 | 0. 445648 |
| PALM               | 19p13. 3            | -0. 073245036 | 0. 32986  | 0. 445648 |

|           |          |              |          |          |
|-----------|----------|--------------|----------|----------|
| RPLP0P2   | 11q12.2  | 0.073234574  | 0.329929 | 0.445711 |
| PIWIL1    | 12q24.33 | 0.073222236  | 0.330011 | 0.445791 |
| SMIM32    | 5q31.1   | -0.073191719 | 0.330213 | 0.446033 |
| MAPK14    | 6p21.31  | -0.073188542 | 0.330234 | 0.446033 |
| ANKRD20A9 | 13q11    | -0.073167619 | 0.330373 | 0.446177 |
| HNRNPCL2  | 1p36.21  | 0.073165691  | 0.330386 | 0.446177 |
| CRYBB1    | 22q12.1  | -0.073154401 | 0.33046  | 0.446248 |
| TIGD3     | 11q13.1  | -0.073134141 | 0.330595 | 0.446399 |
| OR9Q1     | 11q12.1  | -0.073130675 | 0.330618 | 0.4464   |
| DEFA6     | 8p23.1   | -0.073120131 | 0.330688 | 0.446464 |
| HEATR9    | 17q12    | -0.073103938 | 0.330795 | 0.446579 |
| GHRH      | 20q11.23 | -0.073096139 | 0.330847 | 0.446618 |
| DEFB131A  | 4p16.1   | -0.073082763 | 0.330935 | 0.446708 |
| PTPRK     | 6q22.33  | 0.073012784  | 0.3314   | 0.447305 |
| ICAM3     | 19p13.2  | -0.072989768 | 0.331553 | 0.447481 |
| PTCRA     | 6p21.1   | 0.072969337  | 0.331688 | 0.447634 |
| MMD       | 17q22    | -0.072952106 | 0.331803 | 0.447758 |
| SPC25     | 2q24.3   | 0.072943737  | 0.331859 | 0.447803 |
| CD27      | 12p13.31 | -0.072931182 | 0.331942 | 0.447885 |
| SLC27A2   | 15q21.2  | 0.07285795   | 0.332429 | 0.448512 |
| F2RL2     | 5q13.3   | -0.072847488 | 0.332499 | 0.448576 |
| CTXN1     | 19p13.2  | 0.07282238   | 0.332666 | 0.448771 |
| TCTE3     | 6q27     | -0.072816103 | 0.332708 | 0.448797 |
| SNRPB2    | 20p12.1  | 0.072784717  | 0.332917 | 0.449049 |
| PINX1     | 8p23.1   | 0.072772163  | 0.333    | 0.449131 |
| ADAR      | 1q21.3   | -0.072726131 | 0.333307 | 0.449515 |
| DOP1B     | 21q22.12 | -0.072721947 | 0.333335 | 0.449522 |
| RNASE1    | 14q11.2  | 0.0727073    | 0.333432 | 0.449623 |
| SNORA2A   | 12q13.11 | -0.072701318 | 0.333472 | 0.449647 |
| TPD52L3   | 9p24.1   | 0.072686116  | 0.333574 | 0.449753 |
| MGC27382  | 1p31.1   | 0.072675556  | 0.333644 | 0.449817 |
| LRP2      | 2q31.1   | 0.072626431  | 0.333972 | 0.450205 |
| NOTCH2    | 1p12     | -0.072625698 | 0.333977 | 0.450205 |
| C20ORF204 | 20q13.33 | 0.072613144  | 0.33406  | 0.450288 |
| ITM2C     | 2q37.1   | -0.07260059  | 0.334144 | 0.450345 |
| CYP2A7    | 19q13.2  | 0.072600064  | 0.334148 | 0.450345 |
| PARVG     | 22q13.31 | -0.072596405 | 0.334172 | 0.450347 |
| AMHR2     | 12q13.13 | -0.072582056 | 0.334268 | 0.450425 |
| TMEM270   | 7q11.23  | 0.072580971  | 0.334275 | 0.450425 |
| LENEP     | 1q21.3   | 0.072554838  | 0.33445  | 0.45063  |
| C10RF220  | 1q25.2   | 0.072544096  | 0.334522 | 0.450696 |
| OR11H1    | 22q11.1  | 0.072527778  | 0.334631 | 0.450752 |
| OR5H6     | 3q11.2   | 0.072527778  | 0.334631 | 0.450752 |
| PYDC2     | 3q28     | -0.072527778 | 0.334631 | 0.450752 |
| SNHG15    | 7p13     | 0.072518988  | 0.334689 | 0.450801 |
| ZNF414    | 19p13.2  | 0.072498065  | 0.334829 | 0.450959 |
| ZDHHC8    | 22q11.21 | 0.072452033  | 0.335137 | 0.451343 |
| HM13      | 20q11.21 | 0.072433202  | 0.335263 | 0.451482 |
| MRPL18    | 6q25.3   | -0.072418555 | 0.335361 | 0.451584 |
| FAM92A1P2 | 4q35.1   | 0.07241101   | 0.335411 | 0.451621 |
| RASSF10   | 11p15.3  | 0.072382429  | 0.335603 | 0.451848 |
| GPSM1     | 9q34.3   | -0.072372523 | 0.335669 | 0.451907 |
| CATIP     | 2q35     | -0.072356541 | 0.335776 | 0.452021 |
| BCCIP     | 10q26.2  | 0.072334861  | 0.335921 | 0.452186 |

|           |          |              |          |          |
|-----------|----------|--------------|----------|----------|
| FAF1      | 1p32.3   | 0.072305568  | 0.336117 | 0.45242  |
| PKDCC     | 2p21     | 0.072288829  | 0.33623  | 0.45254  |
| PLEKHH1   | 14q24.1  | 0.072276275  | 0.336314 | 0.452598 |
| HIST1H1A  | 6p22.2   | 0.072275661  | 0.336318 | 0.452598 |
| TSC22D2   | 3q25.1   | 0.072265813  | 0.336384 | 0.452656 |
| PSMC3IP   | 17q21.2  | 0.072234428  | 0.336594 | 0.452909 |
| SF1       | 11q13.1  | -0.072192581 | 0.336875 | 0.453256 |
| LRRC19    | 9p21.2   | 0.072114532  | 0.337399 | 0.453931 |
| RHPN1-AS1 | 8q24.3   | 0.072108886  | 0.337437 | 0.453951 |
| LINC01512 | 6p21.1   | -0.072072803 | 0.337679 | 0.454247 |
| PACC1     | 1q32.3   | -0.072069131 | 0.337704 | 0.454249 |
| LL22NC03- | 22q11.22 | 0.072057847  | 0.33778  | 0.454321 |
| FABP7     | 6q22.31  | -0.07202376  | 0.338009 | 0.454599 |
| GUCA1B    | 6p21.1   | 0.072008453  | 0.338112 | 0.454706 |
| SRXN1     | 20p13    | -0.072002176 | 0.338154 | 0.454733 |
| POP1      | 8q22.2   | -0.07197916  | 0.338309 | 0.45491  |
| CATSPER3  | 5q31.1   | -0.071958237 | 0.33845  | 0.455069 |
| PSG10P    | 19q13.2  | -0.071947828 | 0.33852  | 0.455102 |
| CD33      | 19q13.41 | -0.071947775 | 0.33852  | 0.455102 |
| PACSIN2   | 22q13.2  | -0.071924759 | 0.338675 | 0.45528  |
| PNOC      | 8p21.1   | -0.071918519 | 0.338717 | 0.455306 |
| CLEC16A   | 16p13.13 | 0.071903835  | 0.338816 | 0.455408 |
| BNIP2     | 15q22.2  | 0.071899651  | 0.338844 | 0.455415 |
| ZNF239    | 10q11.21 | 0.071870358  | 0.339042 | 0.455619 |
| ZNF487    | 10q11.21 | -0.071870358 | 0.339042 | 0.455619 |
| SLC27A6   | 5q23.3   | -0.071846705 | 0.339201 | 0.455803 |
| LOC553137 | 6q21     | -0.07183887  | 0.339254 | 0.455843 |
| COL27A1   | 9q32     | -0.071822233 | 0.339366 | 0.455963 |
| OR8S1     | 12q13.11 | 0.071804881  | 0.339483 | 0.45606  |
| CLPS      | 6p21.31  | -0.071804765 | 0.339484 | 0.45606  |
| HNF4A     | 20q13.12 | 0.07179294   | 0.339564 | 0.456137 |
| CACNG2    | 22q12.3  | -0.07178011  | 0.33965  | 0.456222 |
| AMN1      | 12p11.21 | -0.07176574  | 0.339747 | 0.456322 |
| TG        | 8q24.22  | 0.071759463  | 0.339789 | 0.456348 |
| C10RF216  | 1p34.3   | -0.071698784 | 0.340199 | 0.456867 |
| FLVCR1-D1 | 1q32.3   | -0.0716946   | 0.340227 | 0.456875 |
| WWC1      | 5q34     | 0.071677861  | 0.34034  | 0.456996 |
| OSTN      | 3q28     | -0.071667995 | 0.340407 | 0.457055 |
| PATL2     | 15q21.1  | -0.071649651 | 0.340531 | 0.45719  |
| PLCH1     | 3q25.31  | 0.071642291  | 0.340581 | 0.457226 |
| ARCN1     | 11q23.3  | -0.071636014 | 0.340623 | 0.457241 |
| PLD1      | 3q26.31  | -0.071633921 | 0.340637 | 0.457241 |
| FAM74A4   | 9q12     | -0.071618089 | 0.340744 | 0.45735  |
| ZNF350    | 19q13.41 | -0.07161509  | 0.340764 | 0.45735  |
| SSX3      | Xp11.23  | 0.071601325  | 0.340857 | 0.457444 |
| STAT5A    | 17q21.2  | 0.071566966  | 0.34109  | 0.457725 |
| LONP2     | 16q12.1  | 0.071552319  | 0.341189 | 0.457828 |
| CBLIF     | 11q12.1  | -0.071489808 | 0.341612 | 0.458365 |
| NDUFA1    | Xq24     | 0.071474902  | 0.341713 | 0.458457 |
| C16ORF86  | 16q22.1  | 0.07147281   | 0.341727 | 0.458457 |
| SUCNR1    | 3q25.1   | -0.071462498 | 0.341797 | 0.45851  |
| SLC35B1   | 17q21.33 | 0.071460256  | 0.341812 | 0.45851  |
| METTL2A   | 17q23.2  | 0.071449794  | 0.341883 | 0.458574 |
| IQCN      | 19p13.11 | -0.071445609 | 0.341911 | 0.458581 |

|           |          |              |          |          |
|-----------|----------|--------------|----------|----------|
| SNORA4    | 3q27.3   | -0.071414391 | 0.342123 | 0.458834 |
| PTMS      | 12p13.31 | -0.07140167  | 0.342209 | 0.458919 |
| RBPJL     | 20q13.12 | -0.071397562 | 0.342237 | 0.458926 |
| SAPCD1    | 6p21.33  | 0.071382838  | 0.342337 | 0.459005 |
| WBP2NL    | 22q13.2  | 0.071378803  | 0.342364 | 0.459005 |
| PALLD     | 4q32.3   | -0.071378654 | 0.342365 | 0.459005 |
| ADORA3    | 1p13.2   | -0.071361915 | 0.342479 | 0.459103 |
| PIAS1     | 15q23    | -0.071359823 | 0.342493 | 0.459103 |
| C2CD4D    | 1q21.3   | 0.07135773   | 0.342507 | 0.459103 |
| PCDHGB8P  | 5q31.3   | 0.071340255  | 0.342625 | 0.459231 |
| CKB       | 14q32.33 | 0.071326345  | 0.34272  | 0.459327 |
| DPP7      | 9q34.3   | 0.071317975  | 0.342777 | 0.459372 |
| NMT1      | 17q21.31 | -0.071301237 | 0.34289  | 0.459463 |
| TMPPE     | 3p22.3   | 0.071301237  | 0.34289  | 0.459463 |
| HRH4      | 18q11.2  | -0.071273422 | 0.343079 | 0.459685 |
| LRRC61    | 7q36.1   | 0.071261482  | 0.34316  | 0.459763 |
| FGR       | 1p35.3   | -0.071236374 | 0.34333  | 0.45996  |
| KCNJ1     | 11q24.3  | -0.071206031 | 0.343537 | 0.460206 |
| CASQ2     | 1p13.1   | -0.071198711 | 0.343586 | 0.460207 |
| SERPINA7  | Xq22.3   | -0.071195395 | 0.343609 | 0.460207 |
| MC4R      | 18q21.32 | -0.071193834 | 0.343619 | 0.460207 |
| SPATA46   | 1q23.3   | -0.071192297 | 0.34363  | 0.460207 |
| HSPD1     | 2q33.1   | 0.071184065  | 0.343686 | 0.460247 |
| C17ORF75  | 17q11.2  | -0.071177788 | 0.343729 | 0.460247 |
| TCP10L    | 21q22.11 | -0.071177788 | 0.343729 | 0.460247 |
| CDK14     | 7q21.13  | -0.071154772 | 0.343885 | 0.460425 |
| COQ4      | 9q34.11  | 0.071121294  | 0.344113 | 0.460699 |
| OR10R2    | 1q23.1   | 0.071077222  | 0.344412 | 0.460977 |
| OR56A3    | 11p15.4  | -0.071077222 | 0.344412 | 0.460977 |
| RBMV2FP   | Yq11.223 | -0.071077222 | 0.344412 | 0.460977 |
| SCP2D1    | 20p11.23 | -0.071077222 | 0.344412 | 0.460977 |
| MAJIN     | 11q13.1  | -0.070987353 | 0.345024 | 0.461765 |
| MAN2B1    | 19p13.13 | 0.070941351  | 0.345338 | 0.462154 |
| CHRND     | 2q37.1   | -0.070923349 | 0.345461 | 0.462271 |
| ABCF3     | 3q27.1   | 0.070920428  | 0.345481 | 0.462271 |
| BMS1P4    | 10q22.2  | -0.070918335 | 0.345495 | 0.462271 |
| CFAP47    | Xp21.1   | 0.070900718  | 0.345615 | 0.4624   |
| FZD6      | 8q22.3   | 0.070897412  | 0.345638 | 0.4624   |
| CNGA4     | 11p15.4  | 0.070887321  | 0.345706 | 0.462461 |
| PEPD      | 19q13.11 | -0.070874396 | 0.345795 | 0.462548 |
| CLPTM1    | 19q13.32 | 0.070868119  | 0.345837 | 0.462555 |
| LINC00161 | 21q21.3  | -0.07086685  | 0.345846 | 0.462555 |
| GNAS-AS1  | 20q13.32 | -0.070863283 | 0.34587  | 0.462557 |
| PP12613   | 4q27     | -0.070838205 | 0.346041 | 0.462755 |
| CNOT8     | 5q33.2   | 0.070834641  | 0.346066 | 0.462756 |
| RPL13AP6  | 10q25.2  | -0.070813717 | 0.346209 | 0.462916 |
| PIAS4     | 19p13.3  | -0.070759316 | 0.34658  | 0.463364 |
| NANOGNB   | 12p13.31 | -0.070757904 | 0.34659  | 0.463364 |
| RNF10     | 12q24.31 | -0.070746762 | 0.346666 | 0.463435 |
| NUDT12    | 5q21.2   | -0.070698638 | 0.346995 | 0.463827 |
| OR1A2     | 17p13.3  | 0.070694505  | 0.347023 | 0.463827 |
| SYT16     | 14q23.2  | -0.070692127 | 0.347039 | 0.463827 |
| MCCC2     | 5q13.2   | 0.070690268  | 0.347052 | 0.463827 |
| CXCL2     | 4q13.3   | -0.070671437 | 0.347181 | 0.463956 |

|           |           |              |          |          |
|-----------|-----------|--------------|----------|----------|
| TBC1D8B   | Xq22. 3   | -0.070669345 | 0.347195 | 0.463956 |
| IL27RA    | 19p13. 12 | -0.070658883 | 0.347267 | 0.464021 |
| HCRTR2    | 6p12. 1   | -0.070618468 | 0.347543 | 0.464359 |
| SPERT     | 13q14. 13 | 0.070598337  | 0.347681 | 0.464512 |
| TGFBR1    | 9q22. 33  | -0.070571004 | 0.347868 | 0.464688 |
| WNT5A     | 3p14. 3   | 0.070571004  | 0.347868 | 0.464688 |
| ZNF687    | 1q21. 3   | -0.070568912 | 0.347883 | 0.464688 |
| CATSPER2F | 15q15. 3  | 0.070556358  | 0.347969 | 0.464772 |
| RTCB      | 22q12. 3  | -0.070537526 | 0.348098 | 0.464913 |
| DOK2      | 8p21. 3   | -0.070531249 | 0.348141 | 0.46494  |
| LEF1      | 4q25      | 0.070499864  | 0.348356 | 0.465196 |
| PTCD2     | 5q13. 2   | -0.070476848 | 0.348514 | 0.465375 |
| NOLC1     | 10q24. 32 | -0.070449647 | 0.3487   | 0.465562 |
| REM1      | 20q11. 21 | -0.070449647 | 0.3487   | 0.465562 |
| KRTAP10-2 | 21q22. 3  | -0.070444246 | 0.348737 | 0.465581 |
| SPATC1    | 8q24. 3   | -0.070438383 | 0.348777 | 0.465603 |
| HIPK4     | 19q13. 2  | 0.070418409  | 0.348914 | 0.465755 |
| ESD       | 13q14. 2  | 0.070399431  | 0.349045 | 0.465898 |
| LINC00934 | 12q24. 23 | -0.0703441   | 0.349424 | 0.466374 |
| CCDC144CF | 17p11. 2  | -0.070326043 | 0.349548 | 0.466508 |
| CTRC      | 1p36. 21  | -0.070319889 | 0.349591 | 0.466533 |
| IL22RA2   | 6q23. 3   | 0.070315644  | 0.34962  | 0.466541 |
| B3GAT2    | 6q13      | 0.070296905  | 0.349749 | 0.466682 |
| PHF12     | 17q11. 2  | -0.070280167 | 0.349864 | 0.466792 |
| ZNF419    | 19q13. 43 | 0.070278074  | 0.349878 | 0.466792 |
| CT45A5    | Xq26. 3   | -0.070247978 | 0.350085 | 0.467037 |
| RAB41     | Xq13. 1   | -0.070178505 | 0.350563 | 0.467643 |
| SHC3      | 9q22. 1   | 0.070156718  | 0.350713 | 0.467812 |
| TBC1D8    | 2q11. 2   | -0.070152533 | 0.350742 | 0.467819 |
| ARRDC1-AS | 9q34. 3   | 0.070148348  | 0.35077  | 0.467827 |
| STRN      | 2p22. 2   | -0.070133702 | 0.350871 | 0.467906 |
| ID2B      | 3p14. 2   | -0.07013293  | 0.350877 | 0.467906 |
| SNORA21   | 17q12     | 0.070126065  | 0.350924 | 0.467938 |
| NGB       | 14q24. 3  | -0.070107785 | 0.35105  | 0.468074 |
| EMP1      | 12p13. 1  | 0.070098132  | 0.351116 | 0.468132 |
| CD44      | 11p13     | 0.0700793    | 0.351246 | 0.468249 |
| SLC9C2    | 1q25. 1   | 0.070075692  | 0.351271 | 0.468249 |
| EMC6      | 17p13. 2  | 0.070075116  | 0.351275 | 0.468249 |
| FAM89A    | 1q42. 2   | -0.070037453 | 0.351534 | 0.468564 |
| LINC00999 | 10p11. 1  | -0.069978867 | 0.351938 | 0.469071 |
| CYP4Z1    | 1p33      | -0.069973738 | 0.351974 | 0.469087 |
| IFI27L1   | 14q32. 12 | 0.069928651  | 0.352285 | 0.469471 |
| VPREB3    | 22q11. 23 | -0.069893227 | 0.35253  | 0.469765 |
| GABRA3    | Xq28      | -0.069888563 | 0.352582 | 0.469804 |
| C10RF21   | 1q25. 3   | -0.069878434 | 0.352632 | 0.469839 |
| TPCN2     | 11q13. 3  | -0.069874249 | 0.352661 | 0.469846 |
| LOC389705 | 9p22. 3   | -0.069845189 | 0.352861 | 0.470053 |
| NCF1      | 7q11. 23  | -0.069844956 | 0.352863 | 0.470053 |
| TRIM72    | 16p11. 2  | 0.069841231  | 0.352889 | 0.470056 |
| LUC7L3    | 17q21. 33 | 0.069834495  | 0.352935 | 0.470085 |
| GAGE1     | Xp11. 23  | 0.069831235  | 0.352958 | 0.470085 |
| TRMT2A    | 22q11. 21 | 0.06982194   | 0.353022 | 0.470139 |
| SLC7A5P1  | 16p11. 2  | 0.069810979  | 0.353098 | 0.470209 |
| RAB29     | 1q32. 1   | -0.069798925 | 0.353181 | 0.470277 |

|           |          |              |          |          |
|-----------|----------|--------------|----------|----------|
| TRIT1     | 1p34.2   | -0.069796832 | 0.353196 | 0.470277 |
| ALDH4A1   | 1p36.13  | -0.069778001 | 0.353326 | 0.470419 |
| ZSWIM6    | 5q12.1   | 0.069761262  | 0.353442 | 0.470529 |
| IL17B     | 5q32     | 0.069759181  | 0.353456 | 0.470529 |
| MAP1LC3B  | 16q24.2  | 0.0697508    | 0.353514 | 0.470575 |
| GTF3C5    | 9q34.13  | 0.069746616  | 0.353543 | 0.470582 |
| MAP4K3    | 2p22.1   | 0.069706861  | 0.353818 | 0.470917 |
| IL22      | 12q15    | -0.069681023 | 0.353997 | 0.471124 |
| EFR3A     | 8q24.22  | -0.069675475 | 0.354035 | 0.471143 |
| LTB4R2    | 14q12    | -0.069662921 | 0.354122 | 0.471228 |
| TYK2      | 19p13.2  | 0.069654552  | 0.35418  | 0.471274 |
| RASEF     | 9q21.32  | 0.069635757  | 0.35431  | 0.471415 |
| ACAA2     | 18q21.1  | -0.069627351 | 0.354369 | 0.471462 |
| SERPING1  | 11q12.1  | -0.069621074 | 0.354412 | 0.471488 |
| C12ORF73  | 12q23.3  | -0.06960852  | 0.354499 | 0.471572 |
| NSD3      | 8p11.23  | 0.069600151  | 0.354557 | 0.471618 |
| CPSF7     | 11q12.2  | -0.069595966 | 0.354586 | 0.471622 |
| ZP4       | 1q43     | 0.069592917  | 0.354607 | 0.471622 |
| TRIM42    | 3q23     | -0.069587143 | 0.354647 | 0.471644 |
| TMEM247   | 2p21     | -0.069552344 | 0.354889 | 0.471933 |
| ADAMTS6   | 5q12.3   | 0.069524826  | 0.355079 | 0.472156 |
| FAM151A   | -        | -0.069504505 | 0.35522  | 0.472312 |
| LINC0146E | 12q14.1  | -0.06947883  | 0.355399 | 0.472493 |
| FAM3B     | 21q22.3  | 0.069474609  | 0.355428 | 0.472493 |
| PIGU      | 20q11.22 | 0.069474609  | 0.355428 | 0.472493 |
| MRPL40    | 22q11.21 | 0.069451593  | 0.355588 | 0.472674 |
| SYNPO2L   | 10q22.2  | 0.069422052  | 0.355793 | 0.472916 |
| DEFB109A  | 8p23.1   | 0.06937762   | 0.356102 | 0.473294 |
| CD300LF   | 17q25.1  | 0.069372084  | 0.35614  | 0.473314 |
| SOX10     | 22q13.1  | -0.06936617  | 0.356181 | 0.473336 |
| TREML1    | 6p21.1   | -0.069360183 | 0.356223 | 0.473336 |
| SLC15A2   | 3q13.33  | 0.06935953   | 0.356227 | 0.473336 |
| GNGT2     | 17q21.32 | -0.069353253 | 0.356271 | 0.473362 |
| PIP5K1B   | 9q21.11  | -0.069346975 | 0.356315 | 0.473389 |
| ANAPC2    | 9q34.3   | -0.069340698 | 0.356358 | 0.473415 |
| SNORA78   | 16p13.3  | 0.069330648  | 0.356428 | 0.473477 |
| SHCBP1L   | 1q25.3   | -0.069312197 | 0.356556 | 0.473616 |
| DMRTB1    | 1p32.3   | -0.06929828  | 0.356653 | 0.473713 |
| C20ORF202 | 20p13    | -0.069292574 | 0.356693 | 0.473722 |
| PCDHGA10  | 5q31.3   | -0.069290482 | 0.356707 | 0.473722 |
| KLRA1P    | 12p13.2  | -0.069277928 | 0.356795 | 0.473806 |
| CAMLG     | 5q31.1   | -0.069267466 | 0.356868 | 0.473871 |
| ZNF826P   | 19p12    | -0.069263281 | 0.356897 | 0.473879 |
| PCP4L1    | 1q23.3   | -0.069251746 | 0.356977 | 0.473954 |
| CCNT2     | 2q21.3   | -0.069219342 | 0.357203 | 0.474222 |
| PNLIPRP2  | 10q25.3  | -0.069198991 | 0.357344 | 0.474378 |
| APBB3     | 5q31.3   | -0.069179587 | 0.357479 | 0.474526 |
| MMP20     | 11q22.2  | -0.069174176 | 0.357517 | 0.474545 |
| CCER1     | 12q21.33 | -0.069156597 | 0.35764  | 0.474652 |
| UROD      | 1p34.1   | 0.069154479  | 0.357654 | 0.474652 |
| B4GALT3   | 1q23.3   | 0.069152386  | 0.357669 | 0.474652 |
| ITGB8     | 7p21.1   | 0.06913774   | 0.357771 | 0.474756 |
| HBE1      | 11p15.4  | -0.069127794 | 0.35784  | 0.474816 |
| INHBC     | 12q13.3  | -0.069117713 | 0.357911 | 0.474878 |

|           |          |              |          |          |
|-----------|----------|--------------|----------|----------|
| TAC4      | 17q21.33 | -0.069085959 | 0.358132 | 0.47514  |
| NKX1-2    | 10q26.13 | -0.06902862  | 0.358532 | 0.475612 |
| LINC00461 | 5q14.3   | -0.069025497 | 0.358554 | 0.475612 |
| LSM3      | 3p25.1   | 0.069024753  | 0.358559 | 0.475612 |
| PRKACB    | 1p31.1   | -0.069014291 | 0.358632 | 0.475677 |
| C17ORF98  | 17q12    | -0.068997615 | 0.358749 | 0.4758   |
| NOL6      | 9p13.3   | -0.068980813 | 0.358866 | 0.475924 |
| SDHAP3    | 5p15.33  | -0.068966167 | 0.358968 | 0.476016 |
| NECTIN1   | 11q23.3  | 0.068964074  | 0.358983 | 0.476016 |
| RNFT2     | 12q24.22 | -0.06895152  | 0.359071 | 0.476101 |
| TRMT13    | 1p21.2   | -0.068932689 | 0.359202 | 0.476244 |
| ACVR1B    | 12q13.13 | -0.068911765 | 0.359348 | 0.476406 |
| NAV1      | 1q32.1   | -0.068895026 | 0.359465 | 0.476529 |
| HIP1R     | 12q24.31 | -0.068876195 | 0.359597 | 0.476672 |
| TMEM217   | 6p21.2   | -0.068855272 | 0.359743 | 0.476835 |
| NUP210L   | 1q21.3   | -0.068847323 | 0.359799 | 0.476877 |
| PRKACG    | 9q21.11  | 0.068829775  | 0.359922 | 0.477008 |
| UBE2Q1    | 1q21.3   | 0.068825979  | 0.359948 | 0.477011 |
| NFKBID    | 19q13.12 | 0.068796686  | 0.360153 | 0.477251 |
| VSIG4     | Xq12     | -0.068788316 | 0.360212 | 0.477297 |
| SNHG7     | 9q34.3   | -0.068746469 | 0.360505 | 0.477654 |
| TMEM267   | 5p12     | -0.068742284 | 0.360534 | 0.477661 |
| PRKAB2    | 1q21.1   | -0.068704622 | 0.360798 | 0.477967 |
| IFT88     | 13q12.11 | -0.06870253  | 0.360813 | 0.477967 |
| ATG9A     | 2q35     | 0.068654405  | 0.36115  | 0.478382 |
| KIAA1191  | 5q35.2   | 0.068620928  | 0.361385 | 0.478636 |
| NXT1      | 20p11.21 | 0.068618835  | 0.361399 | 0.478636 |
| CCNYL1    | 2q33.3   | 0.068616743  | 0.361414 | 0.478636 |
| LOC374443 | 12p13.31 | 0.068610466  | 0.361458 | 0.478638 |
| HIST1H3F  | 6p22.2   | 0.068609514  | 0.361465 | 0.478638 |
| ENOPH1    | 4q21.22  | -0.068606281 | 0.361487 | 0.478638 |
| PLSCR1    | 3q24     | 0.068602097  | 0.361517 | 0.478646 |
| HCG4B     | 6p22.1   | 0.068587594  | 0.361618 | 0.478749 |
| CNBP      | 3q21.3   | 0.068564434  | 0.361781 | 0.478932 |
| FAM76B    | 11q21    | -0.068533049 | 0.362001 | 0.479192 |
| MASP1     | 3q27.3   | 0.068514218  | 0.362133 | 0.479323 |
| ZNF622    | 5p15.1   | -0.068512125 | 0.362148 | 0.479323 |
| CROCCP2   | 1p36.13  | -0.068503756 | 0.362207 | 0.479369 |
| ZNF334    | 20q13.12 | 0.068493294  | 0.36228  | 0.47939  |
| TREH      | 11q23.3  | 0.068491918  | 0.36229  | 0.47939  |
| SUPT6H    | 17q11.2  | 0.068491202  | 0.362295 | 0.47939  |
| CYP2E1    | 10q26.3  | -0.06848074  | 0.362369 | 0.479456 |
| OR6C2     | 12q13.2  | -0.06846056  | 0.36251  | 0.479603 |
| LINC00239 | 14q32.31 | 0.068449355  | 0.362589 | 0.479603 |
| SPANXN1   | Xq27.3   | -0.068449068 | 0.362591 | 0.479603 |
| KCNG4     | 16q24.1  | 0.06844785   | 0.3626   | 0.479603 |
| P2RY6     | 11q13.4  | 0.068443077  | 0.362633 | 0.479603 |
| APOBEC3D  | 22q13.1  | 0.068440985  | 0.362648 | 0.479603 |
| LDAH      | 2p24.1   | -0.068440985 | 0.362648 | 0.479603 |
| ZNF345    | 19q13.12 | -0.068424246 | 0.362766 | 0.479727 |
| SEC22A    | 3q21.1   | 0.068407507  | 0.362883 | 0.479849 |
| COL20A1   | 20q13.33 | 0.068404328  | 0.362906 | 0.479849 |
| LINC00426 | 13q12.3  | -0.068399138 | 0.362942 | 0.479865 |
| HACD1     | 10p12.33 | -0.068386584 | 0.363031 | 0.47995  |



|           |           |              |          |          |
|-----------|-----------|--------------|----------|----------|
| LINC00052 | 15q25.3   | -0.068362922 | 0.363197 | 0.480139 |
| GPR183    | 13q32.3   | -0.068359383 | 0.363222 | 0.48014  |
| AKR1C1    | 10p15.1   | 0.068346829  | 0.36331  | 0.480204 |
| MS4A5     | 11q12.2   | -0.068345636 | 0.363319 | 0.480204 |
| DHRS2     | 14q11.2   | -0.068319628 | 0.363502 | 0.480414 |
| ELN       | 7q11.23   | -0.068313351 | 0.363546 | 0.480441 |
| SUPT7L    | 2p23.3    | -0.068288243 | 0.363723 | 0.480643 |
| ELK4      | 1q32.1    | -0.068281966 | 0.363767 | 0.48067  |
| PREB      | 2p23.3    | -0.068275689 | 0.363811 | 0.480696 |
| TGIF2LX   | Xq21.31   | -0.06827035  | 0.363849 | 0.480714 |
| MAD2L2    | 1p36.22   | -0.06825895  | 0.363929 | 0.480788 |
| SC5D      | 11q23.3-c | -0.068244304 | 0.364032 | 0.480886 |
| NAA11     | 4q21.21   | -0.068241628 | 0.364051 | 0.480886 |
| FAR2      | 12p11.22  | 0.068215011  | 0.364239 | 0.481102 |
| SYCN      | 19q13.2   | -0.06820603  | 0.364302 | 0.481154 |
| COLEC12   | 18p11.32  | -0.068179441 | 0.364489 | 0.481369 |
| SNAR-C3   | 19q13.33  | -0.068176111 | 0.364513 | 0.481369 |
| HLA-DQB1  | 6p21.32   | -0.068166886 | 0.364578 | 0.481423 |
| LY6G6E    | 6p21.33   | 0.068155523  | 0.364658 | 0.481476 |
| AMPD2     | 1p13.3    | -0.068154332 | 0.364666 | 0.481476 |
| MFGE8     | 15q26.1   | 0.068120855  | 0.364903 | 0.481724 |
| NGF       | 1p13.2    | -0.068120855 | 0.364903 | 0.481724 |
| C7ORF65   | 7p12.3    | 0.068108035  | 0.364993 | 0.481797 |
| BAG5      | 14q32.33  | -0.068106208 | 0.365006 | 0.481797 |
| ENTPD5    | 14q24.3   | 0.068093654  | 0.365095 | 0.481882 |
| LEFTY1    | 1q42.12   | 0.068076915  | 0.365213 | 0.482006 |
| GGA1      | 22q13.1   | 0.068058084  | 0.365346 | 0.48215  |
| RMDN2     | 2p22.2    | -0.068047622 | 0.36542  | 0.482203 |
| ARL8B     | 3p26.1    | 0.06804553   | 0.365434 | 0.482203 |
| TSPAN18   | 11p11.2   | -0.068014144 | 0.365656 | 0.482445 |
| KRTAP10-4 | 21q22.3   | -0.068012782 | 0.365666 | 0.482445 |
| CPA1      | 7q32.2    | -0.067993932 | 0.365799 | 0.482576 |
| ANKRD34B  | 5q14.1    | 0.067991897  | 0.365813 | 0.482576 |
| EIF2S3    | Xp22.11   | 0.067968112  | 0.365981 | 0.482766 |
| KCNRG     | 13q14.2   | -0.067936727 | 0.366203 | 0.483027 |
| GALC      | 14q31.3   | -0.067896972 | 0.366484 | 0.483341 |
| L3MBTL1   | 20q13.12  | 0.06789488   | 0.366499 | 0.483341 |
| LOC100268 | 5q35.1    | -0.067892788 | 0.366514 | 0.483341 |
| TSNAX-DIS | 1q42.2    | 0.067867349  | 0.366694 | 0.483546 |
| PTPN7     | 1q32.1    | -0.067842571 | 0.366869 | 0.483733 |
| FBX038    | 5q32      | -0.067840479 | 0.366884 | 0.483733 |
| SH3GLB1   | 1p22.3    | 0.067819555  | 0.367032 | 0.48384  |
| TAPT1-AS1 | 4p15.32   | -0.067819555 | 0.367032 | 0.48384  |
| SCRT2     | 20p13     | -0.067818812 | 0.367038 | 0.48384  |
| ATG4D     | 19p13.2   | 0.067813278  | 0.367077 | 0.48386  |
| PHOX2A    | 11q13.4   | -0.067805415 | 0.367133 | 0.483901 |
| HASPIN    | 17p13.2   | 0.067794447  | 0.36721  | 0.483972 |
| LINC02800 | 1p36.11   | -0.067785652 | 0.367273 | 0.484022 |
| MSS51     | 10q22.2   | -0.0677798   | 0.367314 | 0.484045 |
| SORCS2    | 4p16.1    | -0.067763062 | 0.367433 | 0.484169 |
| GPT2      | 16q11.2   | -0.067740046 | 0.367596 | 0.484325 |
| FADS6     | 17q25.1   | -0.067739503 | 0.3676   | 0.484325 |
| IL9       | 5q31.1    | 0.067725043  | 0.367702 | 0.484428 |
| ILF3-DT   | 19p13.2   | -0.06771703  | 0.367759 | 0.484439 |

|           |           |              |          |          |
|-----------|-----------|--------------|----------|----------|
| INTS14    | 15q22.31  | 0.06771703   | 0.367759 | 0.484439 |
| NEURL3    | 2q11.2    | 0.067712845  | 0.367789 | 0.484446 |
| FGF2      | 4q28.1    | 0.067706568  | 0.367833 | 0.484473 |
| SCTR      | 2q14.2    | 0.067700999  | 0.367873 | 0.484493 |
| GBP4      | 1p22.2    | 0.067679367  | 0.368026 | 0.484663 |
| TMEM69    | 1p34.1    | 0.067652167  | 0.368219 | 0.484882 |
| PRSS41    | 16p13.3   | 0.067649171  | 0.36824  | 0.484882 |
| FCGR1CP   | 1q21.1    | -0.067604042 | 0.36856  | 0.485266 |
| C10ORF113 | 10p12.31  | 0.067599265  | 0.368594 | 0.485266 |
| MATN2     | 8q22.1-q2 | -0.067597765 | 0.368605 | 0.485266 |
| DLEU1     | 13q14.2-c | -0.067585211 | 0.368694 | 0.485351 |
| THEG      | 19p13.3   | -0.067567021 | 0.368823 | 0.48549  |
| NAA60     | 16p13.3   | 0.067558011  | 0.368887 | 0.485507 |
| SLED1     | 4q35.1    | 0.067557551  | 0.368891 | 0.485507 |
| LGALS17A  | 19q13.2   | 0.067553094  | 0.368922 | 0.485507 |
| ZNF789    | 7q22.1    | 0.067549641  | 0.368947 | 0.485507 |
| C7ORF69   | 7p12.3    | -0.067548065 | 0.368958 | 0.485507 |
| R3HCC1    | 8p21.3    | -0.067543364 | 0.368991 | 0.485519 |
| CCNB3     | Xp11.22   | 0.067507794  | 0.369244 | 0.48582  |
| FAM131C   | 1p36.13   | -0.067470132 | 0.369512 | 0.48614  |
| COBLL1    | 2q24.3    | -0.067409453 | 0.369944 | 0.486676 |
| OTUD6A    | Xq13.1    | -0.06739598  | 0.370039 | 0.48677  |
| CLDN9     | 16p13.3   | 0.06738853   | 0.370093 | 0.486807 |
| RABEPK    | 9q33.3    | -0.067363421 | 0.370271 | 0.486998 |
| GRM8      | 7q31.33   | 0.067361329  | 0.370286 | 0.486998 |
| FOXD4     | 9p24.3    | 0.06735296   | 0.370346 | 0.487012 |
| KDM3B     | 5q31.2    | -0.06735296  | 0.370346 | 0.487012 |
| NIPA1     | 15q11.2   | 0.067290189  | 0.370793 | 0.487568 |
| FAM30A    | 14q32.33  | -0.06726699  | 0.370958 | 0.487754 |
| CHD1L     | 1q21.1    | -0.067248342 | 0.371091 | 0.487896 |
| IL3       | 5q31.1    | -0.06724375  | 0.371124 | 0.487907 |
| SERHL     | 22q13.2   | 0.067235788  | 0.371181 | 0.48795  |
| GOLGA2P6  | 10p11.23  | 0.06721864   | 0.371303 | 0.488078 |
| TMEM86B   | 19q13.42  | 0.067214864  | 0.37133  | 0.488082 |
| HDDC3     | 15q26.1   | 0.06720231   | 0.371419 | 0.488167 |
| MICAL2    | 11p15.3   | 0.067198125  | 0.371449 | 0.488174 |
| CRYGD     | 2q33.3    | -0.067176851 | 0.371601 | 0.488342 |
| ARRDC3-AS | 5q14.3    | -0.067152093 | 0.371778 | 0.488542 |
| CLHC1     | 2p16.1    | -0.067139539 | 0.371867 | 0.488628 |
| MRPS9     | 2q12.1    | 0.067129077  | 0.371942 | 0.488694 |
| LMBR1L    | 12q13.12  | -0.067116523 | 0.372032 | 0.488779 |
| LINC01973 | 17q25.3   | -0.067069234 | 0.37237  | 0.489191 |
| ZNF688    | 16p11.2   | 0.067064214  | 0.372405 | 0.489206 |
| SCAND1    | 20q11.23  | 0.067032829  | 0.37263  | 0.489468 |
| TRIM43    | 2q11.1    | -0.067018509 | 0.372732 | 0.489571 |
| APBA3     | 19p13.3   | 0.067001444  | 0.372854 | 0.489699 |
| REXO4     | 9q34.2    | -0.066997259 | 0.372884 | 0.489702 |
| OR52N1    | 11p15.4   | -0.066994195 | 0.372906 | 0.489702 |
| POU5F2    | 5q15      | 0.066973125  | 0.373057 | 0.489845 |
| KHNYN     | 14q12     | -0.066972151 | 0.373064 | 0.489845 |
| TRPM1     | 15q13.3   | -0.06695828  | 0.373163 | 0.489943 |
| NOX1      | Xq22.1    | 0.066939899  | 0.373294 | 0.490084 |
| KCNQ1DN   | 11p15.4 1 | 0.066930599  | 0.373361 | 0.490084 |
| MTHFD1L   | 6q25.1    | 0.066928211  | 0.373378 | 0.490084 |

|            |            |              |          |          |
|------------|------------|--------------|----------|----------|
| POT1       | 7q31. 33   | -0.066928211 | 0.373378 | 0.490084 |
| MARCKS     | 6q21       | -0.066926119 | 0.373393 | 0.490084 |
| SIVA1      | 14q32. 33  | 0.066917749  | 0.373453 | 0.490131 |
| LY6K       | 8q24. 3    | -0.066901361 | 0.37357  | 0.490201 |
| JAML       | 11q23. 3   | -0.066901011 | 0.373573 | 0.490201 |
| DRP2       | Xq22. 1    | -0.066899999 | 0.37358  | 0.490201 |
| HIST1H4C   | 6p22. 2    | -0.066888698 | 0.373661 | 0.490275 |
| C200RF173  | 20q11. 22  | -0.066860338 | 0.373864 | 0.490509 |
| EXOC6B     | 2p13. 2    | -0.066834055 | 0.374052 | 0.490724 |
| SLC25A38   | 3p22. 1    | -0.066815224 | 0.374187 | 0.490869 |
| FFAR1      | 19q13. 12  | -0.066804259 | 0.374266 | 0.490917 |
| FBXL22     | 15q22. 31  | -0.06680267  | 0.374277 | 0.490917 |
| C1RL-AS1   | 12p13. 31  | 0.066796393  | 0.374322 | 0.490917 |
| MPC2       | 1q24. 2    | -0.066796393 | 0.374322 | 0.490917 |
| SPSB4      | 3q23       | -0.066790465 | 0.374365 | 0.490931 |
| VPS36      | 13q14. 3   | -0.066788023 | 0.374382 | 0.490931 |
| MRGPRX3    | 11p15. 1   | 0.066782998  | 0.374418 | 0.490946 |
| RNF13      | 3q25. 1    | -0.066773377 | 0.374487 | 0.490999 |
| NOL7       | 6p23       | 0.066769192  | 0.374517 | 0.490999 |
| TMEM187    | Xq28       | 0.0667671    | 0.374532 | 0.490999 |
| TRPV2      | 17p11. 2   | 0.06675873   | 0.374592 | 0.491046 |
| UBE2D1     | 10q21. 1   | -0.066754546 | 0.374622 | 0.491053 |
| LINC02209  | 8p12       | -0.066725556 | 0.37483  | 0.491261 |
| TTY11      | Yp11. 2    | 0.066725556  | 0.37483  | 0.491261 |
| LINC00894  | Xq28       | 0.066677128  | 0.375178 | 0.491684 |
| CCDC151    | 19p13. 2   | -0.066670851 | 0.375223 | 0.491711 |
| ODR4       | 1q31. 1    | 0.06666039   | 0.375298 | 0.491777 |
| LRP5       | 11q13. 2   | 0.066643651  | 0.375418 | 0.491902 |
| UBTFL1     | 11q14. 3   | -0.066630001 | 0.375516 | 0.491976 |
| UBE2D3     | 4q24       | -0.066629004 | 0.375523 | 0.491976 |
| FSTL5      | 4q32. 2    | -0.066622748 | 0.375568 | 0.492002 |
| CDK5RAP1   | 20q11. 21  | 0.066618542  | 0.375598 | 0.492009 |
| AFDN-DT    | 6q27       | 0.066610173  | 0.375658 | 0.492056 |
| QRICH1     | 3p21. 31   | -0.066582972 | 0.375854 | 0.49228  |
| DYRK1B     | 19q13. 2   | 0.066570418  | 0.375944 | 0.492366 |
| ATF7       | 12q13. 13  | -0.066551587 | 0.376079 | 0.492511 |
| EIF2A      | 3q25. 1    | 0.066541125  | 0.376154 | 0.492577 |
| ZNF586     | 19q13. 43  | 0.066526479  | 0.37626  | 0.49267  |
| PPP2R2D    | 10q26. 3   | -0.066524386 | 0.376275 | 0.49267  |
| STK17A     | 7p13       | -0.066520202 | 0.376305 | 0.492677 |
| BCL11B     | 14q32. 2   | -0.066419769 | 0.377028 | 0.493585 |
| WDR33      | 2q14. 3    | -0.066415584 | 0.377058 | 0.493585 |
| RAB6C      | 2q21. 1    | 0.066413492  | 0.377073 | 0.493585 |
| CHMP7      | 8p21. 3    | 0.066407214  | 0.377118 | 0.493612 |
| NYX        | Xp11. 4    | -0.066396646 | 0.377194 | 0.493679 |
| RAI14      | 5p13. 2    | -0.066373737 | 0.377359 | 0.493863 |
| UPF3B      | Xq24       | -0.066365367 | 0.377419 | 0.49391  |
| FCH02      | 5q13. 2    | 0.066354906  | 0.377495 | 0.493925 |
| CDK12      | 17q12      | -0.066350721 | 0.377525 | 0.493925 |
| MAPKAPK5   | 12q24. 12- | -0.066350721 | 0.377525 | 0.493925 |
| MRPL20-AS1 | 1p36. 33   | 0.066348628  | 0.37754  | 0.493925 |
| PGRMC1     | Xq24       | 0.066344444  | 0.37757  | 0.493925 |
| HCRTR1     | 1p35. 2    | -0.066343119 | 0.37758  | 0.493925 |
| NME4       | 16p13. 3   | 0.06632352   | 0.377721 | 0.494078 |

|          |            |               |           |           |
|----------|------------|---------------|-----------|-----------|
| LILRA5   | 19q13. 42  | -0. 066264934 | 0. 378143 | 0. 494598 |
| RFPL1    | 22q12. 2   | -0. 066243373 | 0. 378299 | 0. 494769 |
| GOT1     | 10q24. 2   | -0. 066195886 | 0. 378642 | 0. 495185 |
| CALCA    | 11p15. 2   | -0. 066185785 | 0. 378714 | 0. 495219 |
| ZNF367   | 9q22. 32 c | -0. 066185425 | 0. 378717 | 0. 495219 |
| MDP1     | 14q12      | 0. 0661373    | 0. 379065 | 0. 495641 |
| UNC5A    | 5q35. 2    | 0. 066116377  | 0. 379216 | 0. 495806 |
| BMP8B    | 1p34. 2    | -0. 066112192 | 0. 379246 | 0. 495813 |
| PPOX     | 1q23. 3    | 0. 066099638  | 0. 379337 | 0. 495899 |
| IGBP1    | Xq13. 1    | 0. 06607453   | 0. 379518 | 0. 496104 |
| GUCD1    | 22q11. 23  | -0. 066057791 | 0. 379639 | 0. 49623  |
| ANKRD39  | 2q11. 2    | 0. 066049421  | 0. 3797   | 0. 496276 |
| GPR156   | 3q13. 33   | -0. 066017224 | 0. 379932 | 0. 496548 |
| MDFIC    | 7q31. 1-qc | -0. 066009667 | 0. 379987 | 0. 496587 |
| GRB2     | 17q25. 1   | -0. 065976189 | 0. 380229 | 0. 496839 |
| TMTC4    | 13q32. 3   | 0. 065976189  | 0. 380229 | 0. 496839 |
| ULBP1    | 6q25. 1    | -0. 065959485 | 0. 38035  | 0. 496964 |
| RDH14    | 2p24. 2    | -0. 065951081 | 0. 380411 | 0. 497011 |
| UBR4     | 1p36. 13   | -0. 065942711 | 0. 380472 | 0. 497058 |
| FBP2     | 9q22. 32   | 0. 065936455  | 0. 380517 | 0. 497084 |
| TFIP11   | 22q12. 1   | 0. 065905049  | 0. 380744 | 0. 497349 |
| CDC42    | 1p36. 12   | 0. 065898772  | 0. 38079  | 0. 497376 |
| OR1M1    | 19p13. 2   | 0. 06588625   | 0. 380881 | 0. 497462 |
| RRH      | 4q25       | -0. 065871525 | 0. 380987 | 0. 497569 |
| HCK      | 20q11. 21  | -0. 065854832 | 0. 381108 | 0. 497694 |
| TOP1P1   | 1q24. 3    | 0. 065848555  | 0. 381154 | 0. 497721 |
| DPPA3    | 12p13. 31  | -0. 065827959 | 0. 381303 | 0. 497883 |
| BTN3A1   | 6p22. 2    | -0. 065800431 | 0. 381503 | 0. 498112 |
| LIMS1    | 2q12. 3    | -0. 065783692 | 0. 381624 | 0. 498238 |
| IGFBP5   | 2q35       | 0. 065756492  | 0. 381821 | 0. 498463 |
| C9ORF47  | 9q22. 1    | -0. 065750558 | 0. 381864 | 0. 498486 |
| DMC1     | 22q13. 1   | 0. 06573989   | 0. 381942 | 0. 498555 |
| GGT1     | 22q11. 23  | 0. 065727199  | 0. 382034 | 0. 498642 |
| NLRP8    | 19q13. 43  | -0. 065687098 | 0. 382325 | 0. 49899  |
| TAS2R41  | 7q35       | 0. 065673306  | 0. 382425 | 0. 499088 |
| IQCF5    | 3p21. 2    | 0. 06566707   | 0. 38247  | 0. 499114 |
| OR9I1    | 11q12. 1   | -0. 065658082 | 0. 382536 | 0. 499167 |
| ELOA2    | 18q21. 1   | -0. 065652342 | 0. 382577 | 0. 499189 |
| TUBG2    | 17q21. 2   | 0. 065641412  | 0. 382657 | 0. 49926  |
| TMEM176A | 7q36. 1    | 0. 065597472  | 0. 382976 | 0. 499631 |
| RAB12    | 18p11. 22  | -0. 06559538  | 0. 382991 | 0. 499631 |
| MFSD6    | 2q32. 2    | -0. 065543071 | 0. 383372 | 0. 500094 |
| CCL15    | 17q12      | 0. 065484622  | 0. 383797 | 0. 500617 |
| VN1R10P  | 6p22. 1    | -0. 065477604 | 0. 383848 | 0. 50065  |
| ILRUN    | 6p21. 31   | -0. 065442638 | 0. 384102 | 0. 500917 |
| CNTD1    | 17q21. 2-c | 0. 065442638  | 0. 384102 | 0. 500917 |
| ESPNL    | 2q37. 3    | 0. 065438488  | 0. 384133 | 0. 500924 |
| TOMM7    | 7p15. 3    | -0. 065423807 | 0. 38424  | 0. 501031 |
| CYP4Z2P  | 1p33       | 0. 06541148   | 0. 384329 | 0. 501115 |
| ACRV1    | 11q24. 2   | 0. 065405409  | 0. 384374 | 0. 50113  |
| HEATR4   | 14q24. 3   | -0. 065403035 | 0. 384391 | 0. 50113  |
| CSMD2    | 1p35. 1    | -0. 065352667 | 0. 384758 | 0. 50157  |
| MN1      | 22q12. 1   | -0. 065348482 | 0. 384788 | 0. 50157  |
| MFSD12   | 19p13. 3   | 0. 06534639   | 0. 384804 | 0. 50157  |

|           |           |              |          |          |
|-----------|-----------|--------------|----------|----------|
| TMSB15A   | Xq22. 1   | -0.065312912 | 0.385048 | 0.50182  |
| ABCB7     | Xq13. 3   | -0.065312912 | 0.385048 | 0.50182  |
| LINC00597 | 15q24. 3  | 0.065309763  | 0.385071 | 0.50182  |
| KAT5      | 11q13. 1  | 0.065298265  | 0.385155 | 0.501896 |
| HIF3A     | 19q13. 32 | 0.065285711  | 0.385246 | 0.501983 |
| FABP9     | 8q21. 13  | -0.065275    | 0.385324 | 0.502004 |
| OR5H2     | 3q11. 2   | -0.065275    | 0.385324 | 0.502004 |
| ACSS1     | 20p11. 21 | -0.065273157 | 0.385338 | 0.502004 |
| ZFAT-AS1  | 8q24. 22  | -0.06522032  | 0.385723 | 0.502474 |
| PVALB     | 22q12. 3  | 0.065195494  | 0.385905 | 0.502677 |
| SLC44A5   | 1p31. 1   | -0.065181093 | 0.38601  | 0.502781 |
| LMX1B     | 9q33. 3   | -0.065174953 | 0.386055 | 0.502807 |
| CCL1      | 17q12     | -0.065160873 | 0.386157 | 0.502908 |
| WASH3P    | 15q26. 3  | 0.065155985  | 0.386193 | 0.502922 |
| OOSP2     | 11q12. 1  | 0.065148579  | 0.386247 | 0.502959 |
| OLFML2B   | 1q23. 3   | -0.065143431 | 0.386285 | 0.502976 |
| HACD3     | 15q22. 31 | -0.065109953 | 0.386529 | 0.503261 |
| PEX10     | 1p36. 32  | 0.065091122  | 0.386667 | 0.503408 |
| TRPC4AP   | 20q11. 22 | 0.065066014  | 0.386851 | 0.503614 |
| COL23A1   | 5q35. 3   | -0.065061863 | 0.386881 | 0.503621 |
| NREP      | 5q22. 1   | 0.065047183  | 0.386988 | 0.503728 |
| RNF148    | 7q31. 32  | -0.065038401 | 0.387053 | 0.503778 |
| RBFA      | 18q23     | -0.065032536 | 0.387096 | 0.503786 |
| DUXA      | 19q13. 43 | -0.065030716 | 0.387109 | 0.503786 |
| HIST1H2BM | 6p22. 1   | 0.065024654  | 0.387153 | 0.503811 |
| KRT25     | 17q21. 2  | -0.064993181 | 0.387384 | 0.504078 |
| WFDC9     | 20q13. 12 | 0.064977079  | 0.387501 | 0.504195 |
| POTEM     | 14q11. 2  | 0.06497395   | 0.387524 | 0.504195 |
| RCVRN     | 17p13. 1  | -0.064954216 | 0.387669 | 0.504351 |
| DARS2     | 1q25. 1   | 0.064942565  | 0.387754 | 0.504429 |
| GADD45B   | 19p13. 3  | -0.064919549 | 0.387923 | 0.504615 |
| FM05      | 1q21. 1   | 0.064915364  | 0.387953 | 0.504622 |
| SIX3      | 2p21      | -0.064894464 | 0.388107 | 0.504788 |
| EDC4      | 16q22. 1  | 0.064873517  | 0.38826  | 0.504942 |
| NCAPG2    | 7q36. 3   | 0.064871425  | 0.388275 | 0.504942 |
| NCK2      | 2q12. 2   | 0.064837947  | 0.388521 | 0.505229 |
| C10RF140  | 1q41      | -0.064834213 | 0.388548 | 0.505231 |
| TMEM126B  | 11q14. 1  | 0.064812839  | 0.388705 | 0.505402 |
| POLR3K    | 16p13. 3  | 0.064802377  | 0.388782 | 0.505469 |
| RNF24     | 20p13     | -0.0647961   | 0.388828 | 0.505496 |
| XK        | Xp21. 1   | 0.06478773   | 0.388889 | 0.505543 |
| CLMN      | 14q32. 13 | 0.064766807  | 0.389043 | 0.505677 |
| TPRN      | 9q34. 3   | 0.064766807  | 0.389043 | 0.505677 |
| CD37      | 19q13. 33 | -0.064747976 | 0.389181 | 0.505795 |
| SNORA79   | 14q31. 1  | -0.064747525 | 0.389184 | 0.505795 |
| SLC26A8   | 6p21. 31  | 0.064695432  | 0.389567 | 0.506259 |
| GUCY2C    | 12p12. 3  | -0.064651727 | 0.389888 | 0.506643 |
| PPBP      | 4q13. 3   | 0.064614352  | 0.390162 | 0.506966 |
| OR2T5     | 1q44      | -0.064611051 | 0.390187 | 0.506966 |
| HP1BP3    | 1p36. 12  | -0.064591049 | 0.390334 | 0.507124 |
| PTPA      | 9q34. 11  | 0.06457431   | 0.390457 | 0.507251 |
| LIN7B     | 19q13. 33 | -0.064570125 | 0.390487 | 0.507258 |
| NAA15     | 4q31. 1   | -0.064551294 | 0.390626 | 0.507379 |
| GNG8      | 19q13. 32 | 0.064548016  | 0.39065  | 0.507379 |

|            |          |              |          |          |
|------------|----------|--------------|----------|----------|
| EPS15L1    | 19p13.11 | 0.064547109  | 0.390657 | 0.507379 |
| LINC00632  | Xq27.1   | -0.064540256 | 0.390707 | 0.507411 |
| PSD2       | 5q31.2   | 0.06453685   | 0.390732 | 0.507411 |
| LRRC71     | 1q23.1   | 0.064509644  | 0.390932 | 0.507638 |
| G6PC2      | 2q31.1   | -0.064444277 | 0.391414 | 0.50823  |
| PDP1       | 8q22.1   | 0.064438307  | 0.391458 | 0.508254 |
| C16ORF82   | 16p12.1  | -0.0644293   | 0.391524 | 0.508307 |
| NFATC4     | 14q12    | 0.064383906  | 0.391858 | 0.508703 |
| DCUN1D2    | 13q34    | 0.064379721  | 0.391889 | 0.508703 |
| GRIN2B     | 12p13.1  | -0.064377538 | 0.391905 | 0.508703 |
| PLEKHG7    | 12q22    | -0.064367167 | 0.391982 | 0.508769 |
| SIGLEC9    | 19q13.41 | -0.064308581 | 0.392414 | 0.509297 |
| SHC2       | 19p13.3  | 0.064298119  | 0.392491 | 0.509364 |
| ZNF790     | 19q13.12 | -0.064291842 | 0.392537 | 0.509391 |
| RRN3       | 16p13.11 | -0.06428138  | 0.392614 | 0.509458 |
| SDHB       | 1p36.13  | 0.064273011  | 0.392676 | 0.50949  |
| LRGUK      | 7q33     | -0.064270918 | 0.392692 | 0.50949  |
| DEFA1B     | 8p23.1   | -0.064267716 | 0.392715 | 0.50949  |
| LIMS3      | 2q13     | -0.064254179 | 0.392815 | 0.509586 |
| DHRX       | Xp22.33  | -0.064239533 | 0.392923 | 0.509647 |
| IGSF6      | 16p12.2  | -0.06423852  | 0.392931 | 0.509647 |
| HNRNPUL1   | 19q13.2  | -0.064237441 | 0.392939 | 0.509647 |
| GSDMA      | 17q21.1  | -0.064222929 | 0.393046 | 0.509753 |
| SLC26A1    | 4p16.3   | 0.06421024   | 0.39314  | 0.509842 |
| GCSAML-AS1 | 1q44     | -0.064195133 | 0.393251 | 0.509953 |
| SLC4A5     | 2p13.1   | -0.064187224 | 0.39331  | 0.509996 |
| ENKUR      | 10p12.1  | 0.064168393  | 0.393449 | 0.510143 |
| SEMA4A     | 1q22     | -0.064149562 | 0.393588 | 0.510264 |
| TRPC3      | 4q27     | -0.064146591 | 0.39361  | 0.510264 |
| THSD7B     | 2q22.1   | 0.06414541   | 0.393618 | 0.510264 |
| GABRR3     | 3q11.2   | -0.064087726 | 0.394045 | 0.510784 |
| WNK1       | 12p13.33 | 0.064042851  | 0.394377 | 0.511181 |
| DBR1       | 3q22.3   | -0.064028205 | 0.394485 | 0.511288 |
| POLD2      | 7p13     | 0.064021928  | 0.394532 | 0.511315 |
| PURG       | 8p12     | -0.064013558 | 0.394594 | 0.511362 |
| BNIP1      | 1q21.3   | 0.063986358  | 0.394795 | 0.51159  |
| MYL6B      | 12q13.2  | -0.06396125  | 0.394981 | 0.511798 |
| DCXR       | 17q25.3  | 0.063938234  | 0.395151 | 0.511979 |
| ZNF584     | 19q13.43 | -0.063934049 | 0.395182 | 0.511979 |
| RALGPS1    | 9q33.3   | -0.063931957 | 0.395198 | 0.511979 |
| HOGA1      | 10q24.2  | -0.063902664 | 0.395415 | 0.512227 |
| STOML3     | 13q13.3  | -0.063895198 | 0.39547  | 0.512261 |
| TOX3       | 16q12.1  | 0.063892202  | 0.395492 | 0.512261 |
| FAM13A     | 4q22.1   | -0.063883832 | 0.395554 | 0.512308 |
| LOC650293  | 4p16.1   | -0.063863578 | 0.395704 | 0.51247  |
| EIF4A3     | 17q25.3  | 0.063856632  | 0.395756 | 0.512503 |
| SPAG11B    | 8p23.1   | 0.063849203  | 0.395811 | 0.512541 |
| CYP26C1    | 10q23.33 | 0.063809031  | 0.396109 | 0.512866 |
| TOMM20     | 1q42.3   | 0.063808508  | 0.396113 | 0.512866 |
| TMEM185B   | 2q14.2   | 0.063800138  | 0.396175 | 0.512913 |
| C5ORF22    | 5p13.3   | -0.063791769 | 0.396237 | 0.51296  |
| BFSP2      | 3q22.1   | -0.063760608 | 0.396468 | 0.513226 |
| SFRP2      | 4q31.3   | -0.063737367 | 0.396641 | 0.513416 |
| PIGH       | 14q24.1  | -0.063708074 | 0.396858 | 0.513661 |

|            |           |               |           |           |
|------------|-----------|---------------|-----------|-----------|
| LYG2       | 2q11. 2   | -0. 063705014 | 0. 396881 | 0. 513661 |
| BCYRN1     | 2p21      | -0. 063694323 | 0. 39696  | 0. 51373  |
| PGAM2      | 7p13      | -0. 063670412 | 0. 397138 | 0. 513927 |
| NLRP14     | 11p15. 4  | -0. 063655055 | 0. 397252 | 0. 514041 |
| SKINT1L    | 1p33      | 0. 063638658  | 0. 397374 | 0. 514165 |
| KLF17      | 1p34. 1   | -0. 063621236 | 0. 397503 | 0. 5143   |
| DNLZ       | 9q34. 3   | 0. 063613918  | 0. 397558 | 0. 514337 |
| PLCD4      | 2q35      | -0. 063601364 | 0. 397651 | 0. 514424 |
| DHRS4L2    | 14q11. 2  | 0. 063592995  | 0. 397713 | 0. 514471 |
| LCN12      | 9q34. 3   | -0. 063546963 | 0. 398056 | 0. 514881 |
| PSMD12     | 17q24. 2  | 0. 063536501  | 0. 398134 | 0. 514948 |
| KDM7A-DT   | 7q34      | 0. 063526039  | 0. 398211 | 0. 515016 |
| FCGBP      | 19q13. 2  | -0. 063511393 | 0. 39832  | 0. 515123 |
| POU1F1     | 3p11. 2   | 0. 063505588  | 0. 398364 | 0. 515146 |
| ELOVL3     | 10q24. 32 | 0. 063497444  | 0. 398424 | 0. 51516  |
| GLUD2      | Xq24      | -0. 063492562 | 0. 398461 | 0. 51516  |
| PCED1B-AS1 | 12q13. 11 | -0. 063492562 | 0. 398461 | 0. 51516  |
| ITLN1      | 1q23. 3   | 0. 063490261  | 0. 398478 | 0. 51516  |
| TCERG1L    | 10q26. 3  | -0. 063484486 | 0. 398521 | 0. 515182 |
| SLC7A9     | 19q13. 11 | -0. 063471771 | 0. 398615 | 0. 515271 |
| CCT6P1     | 7q11. 21  | 0. 06344653   | 0. 398803 | 0. 515481 |
| CD72       | 9p13. 3   | -0. 063421422 | 0. 39899  | 0. 515689 |
| SLC14A1    | 18q12. 3  | 0. 063400498  | 0. 399146 | 0. 515818 |
| WIF1       | 12q14. 3  | 0. 063400379  | 0. 399147 | 0. 515818 |
| INTS4P1    | 7q11. 21  | 0. 063394221  | 0. 399193 | 0. 515818 |
| ZNF518A    | 10q24. 1  | 0. 063394221  | 0. 399193 | 0. 515818 |
| TIMM44     | 19p13. 2  | 0. 063354466  | 0. 399489 | 0. 516167 |
| DDX11L2    | 2q14. 1   | 0. 063323081  | 0. 399723 | 0. 516403 |
| SNX29P2    | 16p11. 2  | 0. 063323081  | 0. 399723 | 0. 516403 |
| S1PR3      | 9q22. 1   | -0. 063312619 | 0. 399801 | 0. 51647  |
| LPGAT1     | 1q32. 3   | -0. 063297973 | 0. 399911 | 0. 516578 |
| EXD1       | 15q15. 1  | 0. 063286192  | 0. 399999 | 0. 516658 |
| PTH2R      | 2q34      | -0. 063276054 | 0. 400074 | 0. 516723 |
| CNOT1      | 16q21     | -0. 06326868  | 0. 400129 | 0. 51676  |
| H2BFXP     | Xq22. 2   | -0. 063227978 | 0. 400433 | 0. 517119 |
| SCARNA20   | 17q23. 2  | 0. 063220557  | 0. 400488 | 0. 517157 |
| VXN        | 8q13. 1   | -0. 063195447 | 0. 400676 | 0. 517366 |
| SPATA31A   | 9p11. 2   | 0. 063185523  | 0. 40075  | 0. 517428 |
| GAST       | 17q21. 2  | 0. 063179847  | 0. 400793 | 0. 51745  |
| METTTL9    | 16p12. 2  | -0. 063172431 | 0. 400848 | 0. 517488 |
| MON1B      | 16q23. 1  | 0. 063166154  | 0. 400895 | 0. 517502 |
| ZNF552     | 19q13. 43 | 0. 063164062  | 0. 40091  | 0. 517502 |
| PXDC1      | 6p25. 2   | 0. 063141046  | 0. 401082 | 0. 51769  |
| CFHR3      | 1q31. 3   | 0. 063136673  | 0. 401115 | 0. 517699 |
| FGF16      | Xq21. 1   | -0. 063096217 | 0. 401418 | 0. 518056 |
| CERCAM     | 9q34. 11  | -0. 063090829 | 0. 401458 | 0. 518061 |
| RNASEH2C   | 11q13. 1  | 0. 063088737  | 0. 401473 | 0. 518061 |
| PON3       | 7q21. 3   | -0. 06308246  | 0. 40152  | 0. 518088 |
| QPCT       | 2p22. 2   | -0. 063065721 | 0. 401646 | 0. 518216 |
| CHRN4      | 15q25. 1  | 0. 063034665  | 0. 401878 | 0. 518419 |
| ACER3      | 11q13. 5  | -0. 063034336 | 0. 40188  | 0. 518419 |
| DCLRE1B    | 1p13. 2   | -0. 063034336 | 0. 40188  | 0. 518419 |
| C8ORF33    | 8q24. 3   | -0. 063019689 | 0. 40199  | 0. 518527 |
| APOBEC3A   | 22q13. 1  | -0. 063000858 | 0. 402131 | 0. 518675 |

|           |          |              |          |          |
|-----------|----------|--------------|----------|----------|
| GLTP      | 12q24.11 | -0.062990396 | 0.402209 | 0.518743 |
| LOC44145E | 9q22.33  | -0.062966367 | 0.402389 | 0.518941 |
| SENP2     | 3q27.2   | -0.062952734 | 0.402491 | 0.519039 |
| PLTP      | 20q13.12 | -0.062938087 | 0.402601 | 0.519147 |
| LRRC74B   | 22q11.21 | -0.062931993 | 0.402647 | 0.519173 |
| LINC0030E | 18q22.1  | -0.062927194 | 0.402682 | 0.519186 |
| GPR150    | 5q15     | -0.062900544 | 0.402882 | 0.519377 |
| HERC2P2   | 15q11.2  | 0.062900425  | 0.402883 | 0.519377 |
| PARP6     | 15q23    | 0.062858578  | 0.403197 | 0.519748 |
| ATF5      | 19q13.33 | 0.062848116  | 0.403275 | 0.519796 |
| SPRYD4    | 12q13.3  | -0.062839746 | 0.403338 | 0.519796 |
| ZNF385A   | 12q13.13 | 0.062839746  | 0.403338 | 0.519796 |
| RPA4      | Xq21.33  | 0.062839719  | 0.403338 | 0.519796 |
| GPR143    | Xp22.2   | 0.062833502  | 0.403385 | 0.519823 |
| SAA3P     | 11p15.1  | -0.062829379 | 0.403416 | 0.519829 |
| NFU1      | 2p13.3   | -0.062818823 | 0.403495 | 0.519871 |
| SPOUT1    | 9q34.11  | 0.06281673   | 0.40351  | 0.519871 |
| RAG1      | 11p12    | 0.062814638  | 0.403526 | 0.519871 |
| METTL4    | 18p11.32 | -0.062772791 | 0.40384  | 0.520242 |
| NSUN4     | 1p33     | -0.06274559  | 0.404044 | 0.520471 |
| CFAP157   | 9q34.11  | -0.062741406 | 0.404076 | 0.520478 |
| ADRA2C    | 4p16.3   | -0.062714205 | 0.40428  | 0.520708 |
| ATP5MC2   | 12q13.13 | 0.062707928  | 0.404327 | 0.520735 |
| LSM14B    | 20q13.33 | -0.062699591 | 0.40439  | 0.520782 |
| REEP5     | 5q22.2   | -0.062687004 | 0.404484 | 0.52087  |
| CD80      | 3q13.33  | 0.06268282   | 0.404516 | 0.520877 |
| CEACAM21  | 19q13.2  | -0.062672358 | 0.404594 | 0.520935 |
| TNFRSF13E | 17p11.2  | -0.062669853 | 0.404613 | 0.520935 |
| C2ORF81   | 2p13.1   | 0.062651434  | 0.404751 | 0.52108  |
| TAF7L     | Xq22.1   | 0.062639883  | 0.404838 | 0.521158 |
| DUSP28    | 2q37.3   | 0.062624234  | 0.404956 | 0.521276 |
| SUPT3H    | 6p21.1   | -0.06261168  | 0.40505  | 0.521337 |
| NCF1C     | 7q11.23  | -0.062607528 | 0.405081 | 0.521337 |
| CDAN1     | 15q15.2  | -0.062607495 | 0.405082 | 0.521337 |
| OR2A5     | 7q35     | 0.062603927  | 0.405108 | 0.521338 |
| ALDH18A1  | 10q24.1  | -0.062590756 | 0.405207 | 0.521432 |
| CASC4     | 15q15.3  | -0.062574017 | 0.405333 | 0.521527 |
| MAP3K21   | 1q42.2   | -0.062574017 | 0.405333 | 0.521527 |
| GDPD4     | 11q13.5  | -0.062562854 | 0.405417 | 0.521601 |
| TRIAP1    | 12q24.31 | -0.062557278 | 0.405459 | 0.521622 |
| DDX55     | 12q24.31 | -0.062544724 | 0.405554 | 0.521709 |
| EAPP      | 14q13.1  | -0.062523833 | 0.405711 | 0.521878 |
| NEB       | 2q23.3   | -0.062511246 | 0.405806 | 0.521886 |
| GPAT3     | 4q21.23  | -0.062509154 | 0.405821 | 0.521886 |
| EIF2S1    | 14q23.3  | 0.062507062  | 0.405837 | 0.521886 |
| RAB6D     | 2q21.1   | -0.062504969 | 0.405853 | 0.521886 |
| GPC5      | 13q31.3  | -0.062503041 | 0.405867 | 0.521886 |
| CNPY3     | 6p21.1   | -0.062498725 | 0.4059   | 0.521886 |
| SGCA      | 17q21.33 | 0.062498692  | 0.4059   | 0.521886 |
| FMNL1     | 17q21.31 | -0.062490323 | 0.405963 | 0.521934 |
| IL12RB1   | 19p13.11 | -0.062486138 | 0.405994 | 0.521941 |
| CCDC198   | 14q22.3  | 0.06245266   | 0.406247 | 0.522218 |
| CXORF40B  | Xq28     | -0.062450568 | 0.406262 | 0.522218 |
| LOC44004C | 11p11.12 | -0.062437857 | 0.406358 | 0.522307 |



|            |           |              |          |          |
|------------|-----------|--------------|----------|----------|
| LAMC3      | 9q34. 12  | -0.062412906 | 0.406546 | 0.522502 |
| DUT        | 15q21. 1  | 0.062410813  | 0.406562 | 0.522502 |
| KCNC4      | 1p13. 3   | 0.062396167  | 0.406672 | 0.522523 |
| GRM2       | 3p21. 2   | -0.062390969 | 0.406711 | 0.522523 |
| TMEM91     | 19q13. 2  | 0.06238989   | 0.406719 | 0.522523 |
| CAMP       | 3p21. 31  | 0.062389246  | 0.406724 | 0.522523 |
| ADGRA3     | 4p15. 2   | 0.062387797  | 0.406735 | 0.522523 |
| LAPTM5     | 1p35. 2   | -0.062387797 | 0.406735 | 0.522523 |
| C2CD4D-AS1 | 1q21. 3   | -0.062379159 | 0.4068   | 0.522573 |
| CSHL1      | 17q23. 3  | -0.062373889 | 0.40684  | 0.522591 |
| PBX2       | 6p21. 32  | -0.062368966 | 0.406877 | 0.522605 |
| NPY        | 7p15. 3   | -0.062364206 | 0.406913 | 0.522617 |
| MYF5       | 12q21. 31 | -0.06235823  | 0.406958 | 0.522641 |
| PDHA2      | 4q22. 3   | 0.062335081  | 0.407133 | 0.522832 |
| REG3A      | 2p12      | -0.062303829 | 0.407368 | 0.523101 |
| CNTN3      | 3p12. 3   | -0.062289457 | 0.407477 | 0.523173 |
| IRF8       | 16q24. 1  | -0.062289457 | 0.407477 | 0.523173 |
| CDX1       | 5q32      | 0.06228331   | 0.407523 | 0.523199 |
| ORMDL3     | 17q21. 1  | 0.062258104  | 0.407713 | 0.52341  |
| NPRL2      | 3p21. 31  | 0.062232963  | 0.407903 | 0.523619 |
| U2AF2      | 19q13. 42 | 0.062222501  | 0.407982 | 0.523687 |
| SNORA71A   | 20q11. 23 | 0.062210563  | 0.408072 | 0.523769 |
| TPGS2      | 18q12. 2  | -0.062172285 | 0.408361 | 0.524107 |
| GCCR       | 17q25. 3  | 0.062161915  | 0.408439 | 0.524141 |
| APCDD1     | 18p11. 22 | 0.062161823  | 0.40844  | 0.524141 |
| APOBEC2    | 6p21. 1   | -0.062153811 | 0.408501 | 0.524185 |
| CYLC2      | 9q31. 1   | -0.062149391 | 0.408534 | 0.524194 |
| ATG12      | 5q22. 3   | 0.062128345  | 0.408693 | 0.524331 |
| NAA40      | 11q13. 1  | -0.062128345 | 0.408693 | 0.524331 |
| C1GALT1C1  | 12p21     | -0.062106408 | 0.408859 | 0.52451  |
| PGBD4      | 15q14     | -0.062094867 | 0.408946 | 0.524588 |
| MPO        | 17q22     | -0.062070084 | 0.409133 | 0.524717 |
| EGR4       | 2p13. 2   | 0.062069889  | 0.409135 | 0.524717 |
| MFAP5      | 12p13. 31 | 0.062069759  | 0.409136 | 0.524717 |
| NMD3       | 3q26. 1   | 0.062067667  | 0.409152 | 0.524717 |
| CLEC19A    | 16p12. 3  | 0.062055455  | 0.409244 | 0.524802 |
| DCSTAMP    | 8q22. 3   | 0.062046743  | 0.40931  | 0.524846 |
| COL2A1     | 12q13. 11 | -0.062043944 | 0.409331 | 0.524846 |
| BCL2L10    | 15q21. 2  | -0.061990006 | 0.409739 | 0.525336 |
| PEAK3      | 19p13. 3  | -0.061983973 | 0.409785 | 0.525361 |
| ZNF480     | 19q13. 41 | 0.061950495  | 0.410038 | 0.525643 |
| CHI3L1     | 1q32. 1   | 0.06194631   | 0.41007  | 0.525643 |
| OR9A4      | 7q34      | -0.061944416 | 0.410084 | 0.525643 |
| METTL1     | 12q14. 1  | 0.061931664  | 0.410181 | 0.525713 |
| TBXT       | 6q27      | -0.061930276 | 0.410191 | 0.525713 |
| CLDN2      | Xq22. 3   | 0.061923294  | 0.410244 | 0.525747 |
| MRT04      | 1p36. 13  | 0.061919109  | 0.410276 | 0.525754 |
| TLL2       | 10q24. 1  | -0.061887724 | 0.410514 | 0.526025 |
| BAGE       | 21p11. 1  | -0.061883825 | 0.410543 | 0.526029 |
| ODF3L2     | 19p13. 3  | -0.061855546 | 0.410758 | 0.52627  |
| HHIPL1     | 14q32. 2  | 0.061843785  | 0.410847 | 0.526351 |
| CD200R1L   | 3q13. 2   | -0.061834539 | 0.410917 | 0.526407 |
| CROCC      | 1p36. 13  | 0.061824953  | 0.41099  | 0.526466 |
| OR13C3     | 9q31. 1   | -0.061817921 | 0.411043 | 0.526501 |

|           |          |              |          |          |
|-----------|----------|--------------|----------|----------|
| FUT5      | 19p13.3  | 0.061802902  | 0.411157 | 0.526613 |
| LINC00917 | 16q24.1  | 0.061795     | 0.411217 | 0.526656 |
| UCKL1-AS1 | 20q13.33 | -0.061772645 | 0.411386 | 0.526839 |
| SDS       | 12q24.13 | 0.061766367  | 0.411434 | 0.52686  |
| ELSPBP1   | 19q13.33 | 0.06176174   | 0.411469 | 0.52686  |
| PARVA     | 11p15.3  | -0.06176009  | 0.411482 | 0.52686  |
| SNORA80A  | 21q22.11 | -0.061754738 | 0.411522 | 0.526878 |
| ANOS1     | Xp22.31  | -0.061749629 | 0.411561 | 0.526894 |
| TTL8      | 22q13.33 | -0.061734935 | 0.411672 | 0.527003 |
| ZFAT      | 8q24.22  | -0.061728705 | 0.41172  | 0.52703  |
| USP14     | 18p11.32 | -0.061716151 | 0.411815 | 0.527104 |
| EDN1      | 6p24.1   | 0.061714059  | 0.411831 | 0.527104 |
| RPL4      | 15q22.31 | -0.06169732  | 0.411958 | 0.527233 |
| LOC100132 | Xp11.4   | -0.061689259 | 0.412019 | 0.527278 |
| MT1H      | 16q13    | -0.061677525 | 0.412108 | 0.527358 |
| C200RF96  | 20p13    | -0.061670119 | 0.412165 | 0.527396 |
| FAM74A1   | 9p12     | -0.061643232 | 0.412369 | 0.527624 |
| IQGAP2    | 5q13.3   | -0.061632457 | 0.412451 | 0.527695 |
| SENP5     | 3q29     | -0.06162618  | 0.412498 | 0.527722 |
| ART5      | 11p15.4  | 0.061614994  | 0.412583 | 0.527754 |
| PIGA      | Xp22.2   | 0.061613625  | 0.412594 | 0.527754 |
| NPW       | 16p13.3  | -0.061612529 | 0.412602 | 0.527754 |
| ABCD1     | Xq28     | 0.061605256  | 0.412657 | 0.527757 |
| NDUFS6    | 5p15.33  | 0.061605256  | 0.412657 | 0.527757 |
| MMAB      | 12q24.11 | -0.061527839 | 0.413246 | 0.528476 |
| OR6S1     | 14q11.2  | -0.061512663 | 0.413361 | 0.528589 |
| IGFBP7    | 4q12     | -0.061506915 | 0.413405 | 0.528598 |
| TMEM60    | 7q11.23  | -0.061504823 | 0.413421 | 0.528598 |
| KIF20B    | 10q23.31 | 0.061490176  | 0.413532 | 0.528707 |
| AZIN1     | 8q22.3   | -0.061465068 | 0.413724 | 0.528917 |
| OPTC      | 1q32.1   | 0.061429368  | 0.413995 | 0.529224 |
| SOHLH2    | 13q13.3  | 0.061426571  | 0.414017 | 0.529224 |
| CENPN     | 16q23.2  | 0.061421129  | 0.414058 | 0.52923  |
| LINC01547 | 21q22.3  | 0.061419036  | 0.414074 | 0.52923  |
| MAGEA8    | Xq28     | 0.061400264  | 0.414217 | 0.529379 |
| MRPL33    | 2p23.2   | -0.061385559 | 0.414329 | 0.529488 |
| ZCRB1     | 12q12    | -0.061373004 | 0.414425 | 0.529576 |
| ATP11A    | 13q34    | 0.061358358  | 0.414536 | 0.529685 |
| PIANP     | 12p13.31 | 0.06134479   | 0.41464  | 0.529783 |
| NEPRO     | 3q13.2   | -0.061312326 | 0.414887 | 0.530052 |
| TBX19     | 1q24.2   | 0.061310234  | 0.414903 | 0.530052 |
| C200RF144 | 20q11.22 | -0.061299493 | 0.414985 | 0.530123 |
| SAV1      | 14q22.1  | -0.061276756 | 0.415158 | 0.530311 |
| OXER1     | 2p21     | -0.06125374  | 0.415334 | 0.530487 |
| PDPN      | 1p36.21  | -0.061251648 | 0.41535  | 0.530487 |
| NTNG1     | 1p13.3   | -0.061230852 | 0.415509 | 0.530656 |
| MRPL50    | 9q31.1   | -0.061226539 | 0.415541 | 0.530664 |
| CPB1      | 3q24     | -0.061220337 | 0.415589 | 0.530671 |
| ZFP57     | 6p22.1   | -0.061218096 | 0.415606 | 0.530671 |
| PF4V1     | 4q13.3   | 0.061212586  | 0.415648 | 0.530671 |
| EPHX1     | 1q42.12  | -0.061211893 | 0.415653 | 0.530671 |
| MAGEA4    | Xq28     | -0.061204594 | 0.415709 | 0.530685 |
| EXOSC6    | 16q22.1  | 0.061203524  | 0.415717 | 0.530685 |
| PI4KAP2   | 22q11.21 | 0.061184692  | 0.415861 | 0.530835 |

|            |          |              |          |          |
|------------|----------|--------------|----------|----------|
| ICOSLG     | 21q22.3  | -0.061140753 | 0.416196 | 0.531195 |
| LEKR1      | 3q25.31  | -0.061140753 | 0.416196 | 0.531195 |
| BORCS8     | 19p13.11 | 0.061136568  | 0.416228 | 0.531202 |
| PCDHGB5    | 5q31.3   | -0.061096813 | 0.416532 | 0.531556 |
| GRIP1      | 12q14.3  | -0.061086352 | 0.416612 | 0.531624 |
| PDC        | 1q31.1   | 0.061076588  | 0.416687 | 0.531685 |
| OR4D10     | 11q12.1  | -0.06105157  | 0.416878 | 0.531866 |
| SDR9C7     | 12q13.3  | -0.061051058 | 0.416882 | 0.531866 |
| KRT31      | 17q21.2  | 0.061043486  | 0.41694  | 0.531906 |
| TAAR6      | 6q23.2   | 0.061024375  | 0.417086 | 0.532059 |
| OR2M1P     | 1q44     | -0.061013449 | 0.417169 | 0.532131 |
| UBE2D2     | 5q31.2   | -0.06100475  | 0.417236 | 0.532182 |
| ZNF837     | 19q13.43 | 0.060992196  | 0.417332 | 0.532271 |
| CHRNA4     | 20q13.33 | -0.060952668 | 0.417635 | 0.532598 |
| NCAPD2     | 12p13.31 | -0.060950348 | 0.417652 | 0.532598 |
| RPS23      | 5q14.2   | -0.060948256 | 0.417668 | 0.532598 |
| SNORA69    | Xq24     | 0.060923334  | 0.417859 | 0.532807 |
| DOC2A      | 16p11.2  | 0.060910594  | 0.417957 | 0.532897 |
| HSPA5      | 9q33.3   | -0.060885485 | 0.418149 | 0.533101 |
| SLITRK6    | 13q31.1  | -0.060881301 | 0.418181 | 0.533101 |
| CAPN11     | 6p21.1   | -0.060879336 | 0.418196 | 0.533101 |
| PTGES2     | 9q34.11  | 0.060870839  | 0.418261 | 0.533149 |
| CAT        | 11p13    | -0.060864562 | 0.418309 | 0.533165 |
| DRAXIN     | 1p36.22  | 0.06086231   | 0.418326 | 0.533165 |
| DLX1       | 2q31.1   | -0.060854168 | 0.418389 | 0.533197 |
| ATAD5      | 17q11.2  | 0.060852008  | 0.418405 | 0.533197 |
| PP2D1      | 3p24.3   | 0.060842117  | 0.418481 | 0.53326  |
| CCDC103    | 17q21.31 | -0.060822715 | 0.41863  | 0.533415 |
| CXCL6      | 4q13.3   | 0.060808195  | 0.418741 | 0.533523 |
| MCM3       | 6p12.2   | 0.060755759  | 0.419143 | 0.534001 |
| SNORD10    | 17p13.1  | -0.060740724 | 0.419258 | 0.534114 |
| HOXC13     | 12q13.13 | -0.060734146 | 0.419309 | 0.534145 |
| EFL1       | 15q25.2  | 0.060707635  | 0.419512 | 0.53437  |
| ZNF572     | 8q24.13  | -0.060699266 | 0.419577 | 0.534417 |
| PQBP1      | Xp11.23  | 0.060665788  | 0.419834 | 0.534697 |
| C7ORF13    | 7q36.3   | -0.060663696 | 0.41985  | 0.534697 |
| MED21      | 12p11.23 | -0.060659511 | 0.419882 | 0.534704 |
| KLF8       | Xp11.21  | -0.060644864 | 0.419994 | 0.534813 |
| CFAP299    | 4q21.21  | -0.060626732 | 0.420133 | 0.534956 |
| KBTBD13    | 15q22.31 | 0.060621741  | 0.420172 | 0.534971 |
| PAN3       | 13q12.2  | 0.060607202  | 0.420283 | 0.535079 |
| POC5       | 5q13.3   | -0.060586278 | 0.420444 | 0.535216 |
| SIRT3      | 11p15.5  | 0.060586278  | 0.420444 | 0.535216 |
| ZNF878     | 19p13.2  | -0.060580793 | 0.420486 | 0.535235 |
| PIGW       | 17q12    | 0.060571632  | 0.420557 | 0.535291 |
| MRGPRG-AS1 | 11p15.4  | -0.060566314 | 0.420598 | 0.535309 |
| DICER1-AS1 | 14q32.13 | 0.060550708  | 0.420718 | 0.535427 |
| PAGE4      | Xp11.23  | 0.060544591  | 0.420765 | 0.535453 |
| HORMAD2    | 22q12.2  | -0.060519679 | 0.420956 | 0.535662 |
| LILRA6     | 19q13.42 | -0.060508861 | 0.421039 | 0.535734 |
| ZNF3       | 7q22.1   | 0.060492122  | 0.421168 | 0.535864 |
| ADAM11     | 17q21.31 | -0.060485877 | 0.421216 | 0.535891 |
| SPDYE2     | 7q22.1   | -0.060470183 | 0.421337 | 0.53601  |
| H3F3AP5    | Xp11.22  | -0.060466558 | 0.421365 | 0.536012 |

|           |           |              |          |          |
|-----------|-----------|--------------|----------|----------|
| U2SURP    | 3q23      | 0.06045446   | 0.421458 | 0.536096 |
| CCL28     | 5p12      | 0.060447168  | 0.421514 | 0.536133 |
| OR2G6     | 1q44      | 0.060430515  | 0.421642 | 0.536262 |
| ANAPC10   | 4q31.21   | -0.060366581 | 0.422134 | 0.536854 |
| FGFR2     | 10q26.13  | -0.060358211 | 0.422199 | 0.536902 |
| ZNRF4     | 19p13.3   | -0.060343144 | 0.422315 | 0.537015 |
| LCTL      | 15q22.31  | -0.060324525 | 0.422458 | 0.537163 |
| PPP1R2C   | Xp11.3    | -0.060317297 | 0.422514 | 0.537179 |
| NXPE2     | 11q23.2-c | -0.060314608 | 0.422535 | 0.537179 |
| PRSS58    | 7q34      | -0.060312514 | 0.422551 | 0.537179 |
| SULT4A1   | 22q13.31  | -0.060301844 | 0.422633 | 0.537249 |
| DZANK1    | 20p11.23  | -0.060289164 | 0.422731 | 0.537339 |
| STT3A     | 11q24.2   | -0.060284979 | 0.422763 | 0.537346 |
| PARK7     | 1p36.23   | -0.060266148 | 0.422908 | 0.537496 |
| TPPP2     | 14q11.2   | -0.060225981 | 0.423218 | 0.537856 |
| TUBB4A    | 19p13.3   | -0.060153161 | 0.42378  | 0.538536 |
| CAV1      | 7q31.2    | 0.060142699  | 0.423861 | 0.538604 |
| GDA       | 9q21.13   | 0.06012076   | 0.42403  | 0.538785 |
| LYSMD1    | 1q21.3    | 0.060096667  | 0.424216 | 0.538987 |
| TSPAN6    | Xq22.1    | -0.060075743 | 0.424378 | 0.539158 |
| LRMP      | 12p12.1   | -0.060056912 | 0.424523 | 0.539298 |
| GPR88     | 1p21.2    | -0.060054487 | 0.424542 | 0.539298 |
| IRAK3     | 12q14.3   | -0.060044358 | 0.42462  | 0.539363 |
| SPPL3     | 12q24.31  | -0.060031804 | 0.424717 | 0.539452 |
| CAMSAP2   | 1q32.1    | -0.059985772 | 0.425073 | 0.53987  |
| ACSM4     | 12p13.31  | -0.059978529 | 0.425129 | 0.539899 |
| CNMD      | 13q14.3   | -0.059975846 | 0.42515  | 0.539899 |
| GSTM5     | 1p13.3    | -0.059958571 | 0.425283 | 0.540034 |
| AGAP6     | 10q11.23  | 0.059933463  | 0.425478 | 0.540247 |
| LINC0095C | 9p13.3    | -0.059923033 | 0.425558 | 0.540315 |
| ACAD10    | 12q24.12  | -0.059908355 | 0.425672 | 0.540424 |
| TMEM33    | 4p13      | 0.059902078  | 0.42572  | 0.540424 |
| LINC0051E | 5p21q21.3 | 0.059901444  | 0.425725 | 0.540424 |
| SCNN1D    | 1p36.33   | 0.059889524  | 0.425818 | 0.540507 |
| DCAF6     | 1q24.2    | -0.059879062 | 0.425899 | 0.540575 |
| CYB5R1    | 1q32.1    | 0.0598686    | 0.42598  | 0.540644 |
| OBSCN     | 1q42.13   | 0.059853954  | 0.426093 | 0.540753 |
| SEL1L2    | 20p12.1   | -0.059847134 | 0.426146 | 0.540786 |
| CD101     | 1p13.1    | -0.059824661 | 0.42632  | 0.540959 |
| GALNT18   | 11p15.4   | -0.059822568 | 0.426336 | 0.540959 |
| AACSP1    | 5q35.3    | -0.059817954 | 0.426372 | 0.54097  |
| SERPIND1  | 22q11.21  | -0.059803768 | 0.426482 | 0.541075 |
| ZNF563    | 19p13.2   | -0.059791183 | 0.426579 | 0.541164 |
| SUSD3     | 9q22.31   | -0.059780721 | 0.42666  | 0.541233 |
| SPATA19   | 11q25     | 0.059767129  | 0.426766 | 0.541332 |
| CABS1     | 4q13.3    | 0.059761887  | 0.426806 | 0.541349 |
| ZNF443    | 19p13.2   | 0.059747243  | 0.42692  | 0.541459 |
| DHX16     | 6p21.33   | 0.059743059  | 0.426952 | 0.541465 |
| ZBTB1     | 14q23.3   | -0.059736782 | 0.427001 | 0.541493 |
| BMP8A     | 1p34.3    | 0.059709581  | 0.427212 | 0.541726 |
| PTER      | 10p13     | 0.059697027  | 0.427309 | 0.541815 |
| FAM161B   | 14q24.3   | -0.05968238  | 0.427423 | 0.541925 |
| S100A7    | 1q21.3    | 0.05967567   | 0.427475 | 0.541956 |
| HNRNPA1   | 12q13.13  | -0.059665641 | 0.427553 | 0.54202  |

|           |           |              |          |          |
|-----------|-----------|--------------|----------|----------|
| AGK       | 7q34      | -0.059648903 | 0.427683 | 0.542116 |
| LRIF1     | 1p13.3    | -0.059648903 | 0.427683 | 0.542116 |
| LYZL2     | 10p11.23  | 0.059644786  | 0.427714 | 0.542122 |
| MTG1      | 10q26.3   | 0.059634256  | 0.427796 | 0.542192 |
| LHCGR     | 2p16.3    | -0.059587646 | 0.428158 | 0.542616 |
| TOR1B     | 9q34.11   | -0.059579855 | 0.428219 | 0.542658 |
| ICAM1     | 19p13.2   | -0.059569393 | 0.4283   | 0.542727 |
| FAM71C    | 12q23.1   | -0.059553561 | 0.428423 | 0.542848 |
| CCDC82    | 11q21     | -0.059529638 | 0.428609 | 0.543049 |
| LINC0261C | 2q37.3    | -0.059498377 | 0.428852 | 0.543323 |
| NPBWR1    | 8q11.23   | 0.059479119  | 0.429001 | 0.543437 |
| BCAS2     | 1p13.2    | -0.059473145 | 0.429048 | 0.543437 |
| OR5D18    | 11q12.1   | 0.059472778  | 0.429051 | 0.543437 |
| TTY21     | Yp11.2    | 0.059472778  | 0.429051 | 0.543437 |
| KHDC3L    | 6q13      | 0.059461306  | 0.42914  | 0.543499 |
| PRR23A    | 3q23      | 0.059459478  | 0.429154 | 0.543499 |
| RSU1P2    | 10q11.21  | -0.059455263 | 0.429187 | 0.543506 |
| FAM201A   | 9p13.1    | 0.059448036  | 0.429243 | 0.543508 |
| RARB      | 3p24.2    | 0.059448036  | 0.429243 | 0.543508 |
| KIAA0040  | 1q25.1    | 0.059441759  | 0.429292 | 0.543536 |
| CRYGN     | 7q36.1    | 0.059415132  | 0.429499 | 0.543763 |
| CCN5      | 20q13.12  | -0.05938945  | 0.429699 | 0.543982 |
| MAPKAPK2  | 1q32.1    | -0.059383173 | 0.429747 | 0.544002 |
| FER1L5    | 2q11.2    | -0.059377899 | 0.429789 | 0.544002 |
| SNORA84   | 9q22.31   | 0.059376934  | 0.429796 | 0.544002 |
| OGG1      | 3p25.3    | 0.05932668   | 0.430187 | 0.544463 |
| MS4A12    | 11q12.2   | 0.059304509  | 0.43036  | 0.544641 |
| RHEB      | 7q36.1    | 0.059301571  | 0.430383 | 0.544641 |
| CPLX4     | 18q21.32  | -0.059254777 | 0.430747 | 0.545067 |
| ZNF672    | 1q44      | -0.059251355 | 0.430774 | 0.545067 |
| EIF5B     | 2q11.2    | -0.05924717  | 0.430807 | 0.545074 |
| CIB2      | 15q25.1   | -0.059238801 | 0.430872 | 0.545122 |
| SFI1      | 22q12.2   | 0.059226247  | 0.43097  | 0.545211 |
| GPD1L     | 3p22.3    | 0.059205323  | 0.431133 | 0.545383 |
| MAF1      | 8q24.3    | 0.059178122  | 0.431345 | 0.545582 |
| RAB31     | 18p11.22  | -0.059178122 | 0.431345 | 0.545582 |
| FBX047    | 17q12 17c | 0.059167398  | 0.431428 | 0.545653 |
| SIDT1     | 3q13.2    | -0.059163476 | 0.431459 | 0.545658 |
| PCSK1N    | Xp11.23   | -0.05913209  | 0.431704 | 0.545933 |
| OR7D2     | 19p13.2   | -0.059119421 | 0.431803 | 0.546008 |
| FSD1      | 19p13.3   | -0.059117444 | 0.431818 | 0.546008 |
| MT1L      | 16q13     | -0.059103875 | 0.431924 | 0.546084 |
| FAM155A   | 13q33.3   | -0.059102797 | 0.431932 | 0.546084 |
| FUCA1     | 1p36.11   | 0.059086059  | 0.432063 | 0.546214 |
| LINC0090E | 19p13.12  | -0.059058902 | 0.432275 | 0.546448 |
| FGFR10P   | 6q27      | -0.059012826 | 0.432635 | 0.546868 |
| MAB21L1   | 13q13.3   | -0.059001473 | 0.432724 | 0.546945 |
| C7ORF33   | 7q36.1    | -0.058941963 | 0.433189 | 0.547499 |
| EMILIN1   | 2p23.3    | 0.058881008  | 0.433665 | 0.548052 |
| ATP1A1    | 1p13.1    | 0.058878915  | 0.433682 | 0.548052 |
| SAFB      | 19p13.3   | -0.058851715 | 0.433895 | 0.548259 |
| ATP13A2   | 1p36.13   | -0.05884753  | 0.433927 | 0.548259 |
| DUSP22    | 6p25.3    | -0.05884753  | 0.433927 | 0.548259 |
| CENPP     | 9q22.31   | -0.058822422 | 0.434124 | 0.548424 |

|            |          |              |          |          |
|------------|----------|--------------|----------|----------|
| COPB1      | 11p15.2  | -0.058820329 | 0.43414  | 0.548424 |
| DDX19A     | 16q22.1  | -0.058820329 | 0.43414  | 0.548424 |
| DEFB119    | 20q11.21 | -0.058806985 | 0.434245 | 0.548521 |
| PTPN4      | 2q14.2   | 0.058780575  | 0.434451 | 0.548748 |
| LINC011012 | 2q14.2   | -0.058776916 | 0.43448  | 0.548749 |
| SPRR2G     | 1q21.3   | 0.058769451  | 0.434539 | 0.548788 |
| ZFH4-AS1   | 8q21.13  | -0.058743667 | 0.43474  | 0.549009 |
| ACOT6      | 14q24.3  | -0.058737013 | 0.434793 | 0.54904  |
| SPIN2B     | Xp11.21  | 0.058721989  | 0.43491  | 0.549154 |
| MRGPRF     | 11q13.3  | -0.058698973 | 0.435091 | 0.549347 |
| RAB32      | 6q24.3   | 0.058680141  | 0.435238 | 0.549498 |
| SYTL3      | 6q25.3   | -0.058621555 | 0.435698 | 0.550043 |
| HEXA       | 15q23    | -0.058602724 | 0.435845 | 0.550195 |
| EHMT1      | 9q34.3   | -0.058594355 | 0.435911 | 0.550243 |
| GLDN       | 15q21.2  | 0.058551492  | 0.436247 | 0.550633 |
| DHX37      | 12q24.31 | -0.058508568 | 0.436584 | 0.551024 |
| STEAP1B    | 7p15.3   | 0.058441613  | 0.43711  | 0.551653 |
| GPATCH8    | 17q21.31 | -0.058437428 | 0.437143 | 0.551659 |
| SPNS2      | 17p13.2  | 0.058414412  | 0.437324 | 0.551853 |
| IL17RB     | 3p21.1   | -0.058399766 | 0.437439 | 0.551963 |
| ALDH8A1    | 6q23.3   | -0.058387212 | 0.437538 | 0.552053 |
| FKBP4      | 12p13.33 | 0.05836838   | 0.437686 | 0.552205 |
| C10RF50    | 1p34.2   | 0.058343272  | 0.437883 | 0.552419 |
| C19ORF57   | 19p13.12 | 0.058328656  | 0.437998 | 0.552529 |
| LGI4       | 19q13.12 | -0.058311887 | 0.43813  | 0.552647 |
| SLC4A3     | 2q35     | -0.058309794 | 0.438147 | 0.552647 |
| PCDHB7     | 5q31.3   | -0.058303517 | 0.438196 | 0.552674 |
| CSK        | 15q24.1  | 0.058274224  | 0.438427 | 0.55293  |
| LY6G6F     | 6p21.33  | 0.058264375  | 0.438504 | 0.552993 |
| PPP1R18    | 6p21.33  | 0.058259578  | 0.438542 | 0.553006 |
| ZNF202     | 11q24.1  | -0.058251239 | 0.438608 | 0.553031 |
| CPT1A      | 11q13.3  | -0.058249116 | 0.438624 | 0.553031 |
| TNFRSF17   | 16p13.13 | -0.058246465 | 0.438645 | 0.553031 |
| SLC47A2    | 17p11.2  | -0.058222443 | 0.438834 | 0.553235 |
| SLC3A1     | 2p21     | 0.058213546  | 0.438904 | 0.553288 |
| NDUFA4L2   | 12q13.3  | 0.058196807  | 0.439036 | 0.553419 |
| CIZ1       | 9q34.11  | -0.058163329 | 0.4393   | 0.553717 |
| TDRD1      | 10q25.3  | -0.058135624 | 0.439518 | 0.553957 |
| SAMD7      | 3q26.2   | -0.058126368 | 0.439591 | 0.553986 |
| PMS2P4     | 7q11.21  | -0.058125667 | 0.439597 | 0.553986 |
| OR4S1      | 11p11.2  | 0.05811735   | 0.439663 | 0.554034 |
| ARHGDI3    | 16p13.3  | -0.058104206 | 0.439766 | 0.55413  |
| OLIG1      | 21q22.11 | -0.058097238 | 0.439821 | 0.554164 |
| ACTN2      | 1q43     | -0.058079665 | 0.43996  | 0.554304 |
| PPP2R3B    | Xp22.33  | -0.058069173 | 0.440042 | 0.554373 |
| HLA-DRB5   | 6p21.32  | -0.058037788 | 0.44029  | 0.55465  |
| AK5        | 1p31.1   | -0.058025234 | 0.440389 | 0.554735 |
| NEUROD6    | 7p14.3   | 0.058022222  | 0.440413 | 0.554735 |
| DCAF13P3   | 15q21.2  | -0.058016456 | 0.440458 | 0.554739 |
| TPSB2      | 16p13.3  | -0.058014772 | 0.440472 | 0.554739 |
| DCAF4L1    | 4p13     | -0.058008495 | 0.440521 | 0.554766 |
| PPP1R17    | 7p14.3   | 0.058003224  | 0.440563 | 0.554784 |
| ROS1       | 6q22.1   | 0.057932157  | 0.441124 | 0.555455 |
| PROCR      | 20q11.22 | 0.057908062  | 0.441314 | 0.55566  |

|           |          |              |          |          |
|-----------|----------|--------------|----------|----------|
| SNX6      | 14q13.1  | 0.0578976    | 0.441397 | 0.555729 |
| HIST1H3C  | 6p22.2   | 0.057887207  | 0.441479 | 0.555798 |
| MPHOSPH1C | 2p13.3   | -0.057847384 | 0.441794 | 0.556159 |
| OTOS      | 2q37.3   | 0.05783724   | 0.441874 | 0.556225 |
| CABYR     | 18q11.2  | -0.057813906 | 0.442059 | 0.556422 |
| ECEL1     | 2q37.1   | -0.057795105 | 0.442207 | 0.556574 |
| ASB15     | 7q31.32  | -0.057788634 | 0.442258 | 0.556603 |
| GRIN2C    | 17q25.1  | -0.057780428 | 0.442323 | 0.556636 |
| PHGDH     | 1p12     | -0.057778336 | 0.44234  | 0.556636 |
| PSMD9     | 12q24.31 | 0.057767874  | 0.442423 | 0.556705 |
| NNMT      | 11q23.2  | 0.057761597  | 0.442472 | 0.556732 |
| FAXDC2    | 5q33.2   | -0.057753227 | 0.442539 | 0.556781 |
| CCDC170   | 6q25.1   | -0.057744858 | 0.442605 | 0.556829 |
| SNX27     | 1q21.3   | 0.057715565  | 0.442837 | 0.557086 |
| ACAN      | 15q26.1  | -0.057703011 | 0.442936 | 0.557141 |
| CHRFAM7A  | 15q13.2  | -0.057703011 | 0.442936 | 0.557141 |
| ANKRD66   | 6p12.3   | 0.05769301   | 0.443015 | 0.557205 |
| ERP44     | 9q31.1   | -0.057679995 | 0.443118 | 0.55727  |
| C10RF198  | 1q42.2   | 0.057677903  | 0.443135 | 0.55727  |
| MYBPC2    | 19q13.33 | -0.057675969 | 0.44315  | 0.55727  |
| CFD       | 19p13.3  | -0.057669533 | 0.443201 | 0.557299 |
| FAM187B   | 19q13.12 | 0.057661221  | 0.443267 | 0.557346 |
| KCTD3     | 1q41     | 0.057654887  | 0.443317 | 0.557374 |
| CLIC5     | 6p21.1   | -0.057650702 | 0.44335  | 0.557381 |
| XKRX      | Xq22.1   | -0.05762667  | 0.443541 | 0.557585 |
| CCDC136   | 7q32.1   | -0.057617224 | 0.443616 | 0.557644 |
| SARS      | 1p13.3   | -0.057592116 | 0.443815 | 0.557837 |
| DDX53     | Xp22.11  | -0.057590866 | 0.443824 | 0.557837 |
| WDR54     | 2p13.1   | 0.057560731  | 0.444063 | 0.558102 |
| LYPD8     | 1q44     | -0.057546698 | 0.444175 | 0.558207 |
| E2F3      | 6p22.3   | -0.057525161 | 0.444345 | 0.558386 |
| CCDC85C   | 14q32.2  | -0.057512606 | 0.444445 | 0.558476 |
| ANXA13    | 8q24.13  | 0.057508422  | 0.444478 | 0.558483 |
| GATM      | 15q21.1  | -0.057464482 | 0.444827 | 0.558886 |
| FBXL20    | 17q12    | -0.057435189 | 0.445059 | 0.559143 |
| C12ORF75  | 12q23.3  | 0.05742682   | 0.445126 | 0.559177 |
| PIGR      | 1q32.1   | 0.057424727  | 0.445142 | 0.559177 |
| PATE2     | 11q24.2  | -0.057395149 | 0.445377 | 0.559437 |
| LUM       | 12q21.33 | -0.05739125  | 0.445408 | 0.55944  |
| KRTAP5-4  | 11p15.5  | 0.057375622  | 0.445532 | 0.559561 |
| LIPM      | 10q23.31 | 0.057346082  | 0.445767 | 0.559821 |
| CCDC71    | 3p21.31  | 0.057328479  | 0.445907 | 0.559961 |
| APOA5     | 11q23.3  | -0.057307396 | 0.446074 | 0.560123 |
| CELA3B    | 1p36.12  | -0.05730522  | 0.446092 | 0.560123 |
| CXCR4     | 2q22.1   | -0.057295001 | 0.446173 | 0.56019  |
| TMEM17    | 2p15     | -0.057278292 | 0.446306 | 0.560321 |
| ASPSR1    | 17q25.3  | 0.057238508  | 0.446622 | 0.560683 |
| SIAE      | 11q24.2  | -0.057209215 | 0.446855 | 0.560941 |
| RETNLB    | 3q13.13  | -0.057164655 | 0.44721  | 0.561351 |
| JPX       | Xq13.2   | 0.057144352  | 0.447372 | 0.561518 |
| MEIS1     | 2p14     | -0.05712552  | 0.447522 | 0.561671 |
| FCGR2B    | 1q23.3   | -0.057117151 | 0.447588 | 0.561697 |
| HIST1H2BE | 6p22.2   | -0.057114847 | 0.447607 | 0.561697 |
| PSG11     | 19q13.31 | 0.057110319  | 0.447643 | 0.561697 |

|           |           |               |           |           |
|-----------|-----------|---------------|-----------|-----------|
| CCNE2     | 8q22. 1   | 0. 057108782  | 0. 447655 | 0. 561697 |
| HAUS7     | Xq28      | 0. 057094135  | 0. 447772 | 0. 561773 |
| RAB40AL   | Xq22. 1   | -0. 057094135 | 0. 447772 | 0. 561773 |
| CSRNP1    | 3p22. 2   | -0. 057066934 | 0. 447988 | 0. 561995 |
| SMIM10L2E | Xq26. 3   | -0. 057064842 | 0. 448005 | 0. 561995 |
| PRDM14    | 8q13. 3   | -0. 057038813 | 0. 448212 | 0. 56222  |
| FPGT      | 1p31. 1   | -0. 057031364 | 0. 448272 | 0. 56226  |
| PARPBP    | 12q23. 2  | 0. 057016718  | 0. 448388 | 0. 562371 |
| DNTT      | 10q24. 1  | -0. 057008206 | 0. 448456 | 0. 562421 |
| UBAC1     | 9q34. 3   | 0. 056997887  | 0. 448539 | 0. 562474 |
| CNPY2     | 12q13. 3  | -0. 056995794 | 0. 448555 | 0. 562474 |
| CST8      | 20p11. 21 | 0. 056968104  | 0. 448776 | 0. 562716 |
| ADGRA1    | 10q26. 3  | -0. 056953338 | 0. 448894 | 0. 562828 |
| TMEM235   | 17q25. 3  | -0. 05694223  | 0. 448983 | 0. 562904 |
| PLXDC1    | 17q12     | -0. 056930931 | 0. 449073 | 0. 562982 |
| RBM17     | 10p15. 1  | 0. 056895361  | 0. 449357 | 0. 563302 |
| HLX       | 1q41      | 0. 056824221  | 0. 449925 | 0. 563979 |
| SPRED2    | 2p14      | 0. 056803298  | 0. 450092 | 0. 564153 |
| DRG2      | 17p11. 2  | -0. 05679702  | 0. 450142 | 0. 56418  |
| UQCC1     | 20q11. 22 | -0. 056792836 | 0. 450175 | 0. 564187 |
| HIST1H4B  | 6p22. 2   | -0. 056769866 | 0. 450359 | 0. 564382 |
| ACTRT1    | Xq25      | 0. 056747061  | 0. 450541 | 0. 564575 |
| MTFR1     | 8q13. 1   | -0. 056740527 | 0. 450593 | 0. 56459  |
| PPFIA2    | 12q21. 31 | -0. 056738464 | 0. 45061  | 0. 56459  |
| LHX2      | 9q33. 3   | -0. 056700898 | 0. 45091  | 0. 564931 |
| CTSL3P    | 9q21. 33  | -0. 056697058 | 0. 450941 | 0. 564934 |
| MON1A     | 3p21. 31  | 0. 056650556  | 0. 451313 | 0. 565362 |
| ZNF19     | 16q22. 2  | -0. 056646371 | 0. 451346 | 0. 565362 |
| SLC22A1   | 6q25. 3   | -0. 056643688 | 0. 451368 | 0. 565362 |
| PKD2L1    | 10q24. 31 | 0. 056626939  | 0. 451502 | 0. 565495 |
| CDH15     | 16q24. 3  | 0. 056620207  | 0. 451556 | 0. 565527 |
| FGF4      | 11q13. 3  | 0. 056614661  | 0. 4516   | 0. 565547 |
| ATG101    | 12q13. 13 | 0. 056608708  | 0. 451648 | 0. 565571 |
| CTRB1     | 16q23. 1  | -0. 056591022 | 0. 451789 | 0. 565689 |
| ZNF716    | 7p11. 2   | -0. 056589947 | 0. 451798 | 0. 565689 |
| OR5R1     | 11q12. 1  | -0. 056571667 | 0. 451944 | 0. 565793 |
| OR6C65    | 12q13. 2  | 0. 056571667  | 0. 451944 | 0. 565793 |
| KLHL20    | 1q25. 1   | -0. 056568954 | 0. 451966 | 0. 565793 |
| GCNA      | Xq13. 1   | -0. 05651249  | 0. 452418 | 0. 566323 |
| LPIN2     | 18p11. 31 | -0. 056508275 | 0. 452452 | 0. 56633  |
| ITSN2     | 2p23. 3   | -0. 056497813 | 0. 452536 | 0. 5664   |
| MBD3      | 19p13. 3  | -0. 056474798 | 0. 45272  | 0. 566595 |
| HIST1H3B  | 6p22. 2   | 0. 056471108  | 0. 45275  | 0. 566597 |
| RPS4X     | Xq13. 1   | -0. 056464336 | 0. 452804 | 0. 566615 |
| BFSP1     | 20p12. 1  | 0. 056462243  | 0. 452821 | 0. 566615 |
| GBP7      | 1p22. 2   | -0. 056435249 | 0. 453037 | 0. 56683  |
| CDCP2     | 1p32. 3   | 0. 056433675  | 0. 45305  | 0. 56683  |
| APLN      | Xq26. 1   | -0. 056399473 | 0. 453324 | 0. 567138 |
| MYO6      | 6q14. 1   | 0. 056384826  | 0. 453442 | 0. 567249 |
| MAN1B1    | 9q34. 3   | 0. 056365995  | 0. 453593 | 0. 567403 |
| CARD18    | 11q22. 3  | 0. 056357835  | 0. 453658 | 0. 567449 |
| SNU13     | 22q13. 2  | 0. 056317871  | 0. 453979 | 0. 567815 |
| DBF4B     | 17q21. 31 | -0. 056282301 | 0. 454265 | 0. 568137 |
| SMTN      | 22q12. 2  | 0. 05626347   | 0. 454416 | 0. 56829  |



|           |           |              |          |          |
|-----------|-----------|--------------|----------|----------|
| KMT2E-AS1 | 7q22.3    | 0.056213253  | 0.454819 | 0.568759 |
| FARS2     | 6p25.1    | -0.056196514 | 0.454954 | 0.568892 |
| LURAP1    | 1p34.1    | -0.056183989 | 0.455055 | 0.568982 |
| PEMT      | 17p11.2   | -0.056169313 | 0.455173 | 0.569094 |
| FSD2      | 15q25.2   | -0.056157392 | 0.455269 | 0.56917  |
| RNF44     | 5q35.2    | 0.056154667  | 0.45529  | 0.56917  |
| PROKR2    | 20p12.3   | -0.05614142  | 0.455397 | 0.569268 |
| VAX1      | 10q25.3   | 0.056137392  | 0.455429 | 0.569272 |
| AGER      | 6p21.32   | 0.056064696  | 0.456014 | 0.569968 |
| HAL       | 12q23.1   | -0.056058419 | 0.456065 | 0.569995 |
| TEFM      | 17q11.2   | 0.05602497   | 0.456334 | 0.570296 |
| ADAM21P1  | 14q24.2   | 0.056020784  | 0.456368 | 0.570303 |
| ADAM32    | 8p11.22   | 0.056014479  | 0.456418 | 0.57033  |
| SYCE1     | 10q26.3   | -0.056010227 | 0.456453 | 0.570338 |
| RBM5      | 3p21.31   | -0.056004017 | 0.456503 | 0.570364 |
| DNAH1     | 3p21.1    | 0.055987278  | 0.456637 | 0.570497 |
| INTU      | 4q28.1    | 0.055978909  | 0.456705 | 0.570546 |
| RBM39     | 20q11.22  | -0.055964263 | 0.456823 | 0.570657 |
| EPB41L4A  | 5q22.1-q2 | 0.055957985  | 0.456873 | 0.570685 |
| KIR3DP1   | 19q13.42  | -0.055951392 | 0.456927 | 0.570716 |
| COL9A1    | 6q13      | 0.055929768  | 0.457101 | 0.570898 |
| PPP2R5A   | 1q32.3    | -0.055907769 | 0.457278 | 0.571083 |
| KRTAP1-5  | 17q21.2   | 0.055894271  | 0.457387 | 0.571159 |
| MGC57346  | 17q21.31  | 0.055893122  | 0.457396 | 0.571159 |
| RAP1GDS1  | 4q23      | 0.055847091  | 0.457767 | 0.571587 |
| FSHR      | 2p16.3    | -0.055828712 | 0.457916 | 0.571737 |
| EMILIN3   | 20q12     | -0.055809428 | 0.458071 | 0.571895 |
| PAQR7     | 1p36.11   | 0.055798966  | 0.458156 | 0.571965 |
| SPDYE1    | 7p13      | -0.05578432  | 0.458274 | 0.572068 |
| FLVCR2    | 14q24.3   | 0.055779118  | 0.458316 | 0.572068 |
| RRN3P2    | 16p11.2   | 0.055778072  | 0.458324 | 0.572068 |
| PRR32     | Xq25      | 0.055769764  | 0.458391 | 0.572116 |
| FAM217A   | 6p25.2    | -0.05576032  | 0.458467 | 0.572175 |
| GRK7      | 3q23      | -0.05574237  | 0.458612 | 0.57232  |
| MIGA2     | 9q34.11   | 0.055717364  | 0.458814 | 0.572537 |
| MS4A14    | 11q12.2   | -0.055711087 | 0.458865 | 0.57255  |
| CBY1      | 22q13.1   | -0.055708995 | 0.458882 | 0.57255  |
| CUL3      | 2q36.2    | -0.055698533 | 0.458966 | 0.572619 |
| COL4A1    | 13q34     | -0.055688071 | 0.459051 | 0.572674 |
| PACRGL    | 4p15.31   | -0.055685979 | 0.459068 | 0.572674 |
| MDH1      | 2p15      | 0.05567761   | 0.459135 | 0.572723 |
| HIST2H2AC | 1q21.2    | 0.055673425  | 0.459169 | 0.572729 |
| SDHAF3    | 7q21.3    | -0.055639947 | 0.45944  | 0.573016 |
| PRIM2     | 6p11.2    | 0.055637855  | 0.459457 | 0.573016 |
| GPATCH2   | 1q41      | 0.055619024  | 0.459609 | 0.573156 |
| PLEKHA2   | 8p11.22   | 0.055616931  | 0.459626 | 0.573156 |
| DHRS4     | 14q11.2   | -0.055610654 | 0.459676 | 0.573183 |
| PIGL      | 17p11.2   | 0.055575084  | 0.459964 | 0.573502 |
| DRGX      | 10q11.23  | 0.055571885  | 0.45999  | 0.573502 |
| TRIM62    | 1p35.1    | -0.055524868 | 0.46037  | 0.57391  |
| CNTFR-AS1 | 9p13.3    | 0.055517337  | 0.460431 | 0.57391  |
| IFNAR2    | 21q22.11  | 0.055516498  | 0.460438 | 0.57391  |
| OR2A9P    | 7q35      | 0.055514406  | 0.460455 | 0.57391  |
| MAGEB1    | Xp21.2    | -0.055510224 | 0.460489 | 0.57391  |

|           |           |              |          |          |
|-----------|-----------|--------------|----------|----------|
| PPIP5K1   | 15q15.3   | 0.055510221  | 0.460489 | 0.57391  |
| OR7E24    | 19p13.2   | 0.055486075  | 0.460684 | 0.574117 |
| SNORA72   | 8q22.2    | 0.055474489  | 0.460778 | 0.574198 |
| SRRM2     | 16p13.3   | 0.055466282  | 0.460844 | 0.574245 |
| IRGM      | 5q33.1    | -0.055451314 | 0.460965 | 0.57436  |
| OLIG3     | 6q23.3    | 0.055443237  | 0.461031 | 0.574406 |
| SYN1      | Xp11.3-p1 | -0.055434896 | 0.461098 | 0.574455 |
| SLC35G6   | 17p13.1   | -0.055420169 | 0.461218 | 0.574549 |
| PSG4      | 19q13.31  | 0.055418432  | 0.461232 | 0.574549 |
| ZDHHC8P1  | 22q11.23  | -0.055413973 | 0.461268 | 0.574558 |
| BAALC-AS2 | 8q22.3    | -0.055384748 | 0.461505 | 0.574802 |
| RFPL4B    | 6q21      | -0.055382702 | 0.461521 | 0.574802 |
| CKAP5     | 11p11.2   | -0.055374218 | 0.46159  | 0.574852 |
| AICDA     | 12p13.31  | -0.055367034 | 0.461648 | 0.574889 |
| PCDHB17P  | 5q31.3    | -0.055357508 | 0.461725 | 0.574949 |
| XIRP1     | 3p22.2    | -0.055353294 | 0.461759 | 0.574956 |
| CFAP300   | 11q22.1   | 0.055336556  | 0.461895 | 0.575089 |
| KLC3      | 19q13.32  | 0.055332371  | 0.461929 | 0.575095 |
| BORCS5    | 12p13.2   | 0.055324001  | 0.461997 | 0.575144 |
| PPFIA3    | 19q13.33  | -0.055309355 | 0.462116 | 0.575256 |
| ANXA7     | 10q22.2   | -0.05530517  | 0.46215  | 0.575262 |
| RPF2      | 6q21      | -0.055290524 | 0.462268 | 0.575374 |
| MNT       | 17p13.3   | -0.055284247 | 0.462319 | 0.575402 |
| RTF1      | 15q15.1   | 0.055271693  | 0.462421 | 0.575478 |
| SERP1     | 3q25.1    | -0.0552696   | 0.462438 | 0.575478 |
| CD1E      | 1q23.1    | -0.055240307 | 0.462676 | 0.575738 |
| HBD       | 11p15.4   | -0.055234383 | 0.462724 | 0.575762 |
| LIPC      | 15q21.3   | -0.055219384 | 0.462845 | 0.575877 |
| FGD5      | 3p25.1    | 0.05516289   | 0.463304 | 0.576412 |
| LIPK      | 10q23.31  | 0.055157444  | 0.463348 | 0.576431 |
| ACTR1A    | 10q24.32  | 0.055144059  | 0.463457 | 0.576494 |
| ZNF764    | 16p11.2   | -0.055144059 | 0.463457 | 0.576494 |
| CT45A4    | Xq26.3    | 0.055137434  | 0.463511 | 0.576507 |
| VEGFB     | 11q13.1   | 0.055135689  | 0.463525 | 0.576507 |
| OR52N4    | 11p15.4   | -0.055131418 | 0.463559 | 0.576514 |
| LELP1     | 1q21.3    | -0.055121111 | 0.463643 | 0.576583 |
| BMERB1    | 16p13.11  | -0.055116858 | 0.463678 | 0.57659  |
| HTN3      | 4q13.3    | -0.055083342 | 0.46395  | 0.576892 |
| GNB1      | 1p36.33   | -0.055075011 | 0.464018 | 0.576932 |
| RNF145    | 5q33.3    | -0.055070826 | 0.464052 | 0.576932 |
| SLC40A1   | 2q32.2    | 0.055068734  | 0.464069 | 0.576932 |
| LZTS1     | 8p21.3    | -0.055062457 | 0.46412  | 0.57696  |
| PLSCR5    | 3q24      | -0.055057127 | 0.464163 | 0.576978 |
| LOC344967 | 4p14      | -0.055050536 | 0.464217 | 0.577009 |
| CDH11     | 16q21     | -0.055003871 | 0.464596 | 0.577444 |
| OR1J4     | 9q33.2    | 0.054966037  | 0.464904 | 0.577791 |
| NBPF11    | 1q21.2    | -0.054962024 | 0.464936 | 0.577795 |
| SAGE1     | Xq26.3    | 0.054954868  | 0.464995 | 0.577829 |
| CISD2     | 4q24      | -0.054951562 | 0.465021 | 0.577829 |
| ADAM17    | 2p25.1    | 0.054903438  | 0.465413 | 0.578244 |
| AK1       | 9q34.11   | 0.054903438  | 0.465413 | 0.578244 |
| TP53TG3B  | 16p11.2   | -0.054893416 | 0.465495 | 0.578309 |
| KRTAP19-1 | 21q22.11  | -0.054876477 | 0.465633 | 0.578445 |
| NDUFB5    | 3q26.33   | 0.054867868  | 0.465703 | 0.578496 |

|           |           |              |          |          |
|-----------|-----------|--------------|----------|----------|
| TNFSF4    | 1q25.1    | 0.054842759  | 0.465907 | 0.578714 |
| ADGRE4P   | 19p13.2   | -0.05482284  | 0.466069 | 0.578879 |
| ACTL7B    | 9q31.3    | 0.054765896  | 0.466533 | 0.57942  |
| TMC8      | 17q25.3   | -0.054742326 | 0.466725 | 0.579622 |
| SMIM30    | 7q31.1    | -0.054736049 | 0.466777 | 0.57965  |
| ESRG      | 3p14.3 3p | 0.054717078  | 0.466931 | 0.579806 |
| CHSY3     | 5q23.3    | -0.054713033 | 0.466964 | 0.579811 |
| GAS8-AS1  | 16q24.3   | 0.054703929  | 0.467038 | 0.579867 |
| AQP7P3    | 9q21.11   | -0.054687984 | 0.467169 | 0.579992 |
| P3H4      | 17q21.2   | 0.054675371  | 0.467271 | 0.580048 |
| ZNF485    | 10q11.21  | 0.054675371  | 0.467271 | 0.580048 |
| LILRB4    | 19q13.42  | -0.054646078 | 0.46751  | 0.580309 |
| LMOD1     | 1q32.1    | -0.054623062 | 0.467698 | 0.580506 |
| VAMP5     | 2p11.2    | 0.054616785  | 0.467749 | 0.580533 |
| ZNF544    | 19q13.43  | -0.054608415 | 0.467818 | 0.580582 |
| RASAL2    | 1q25.2    | 0.054597954  | 0.467903 | 0.580607 |
| DHRS7C    | 17p13.1   | -0.054596416 | 0.467916 | 0.580607 |
| TMPRSS11F | 4q13.2    | 0.054595122  | 0.467926 | 0.580607 |
| SCUBE3    | 6p21.31   | 0.054591677  | 0.467954 | 0.580607 |
| KLHL40    | 3p22.1    | 0.054569558  | 0.468135 | 0.580795 |
| SATB2     | 2q33.1    | 0.054564476  | 0.468176 | 0.580811 |
| USP29     | 19q13.43  | -0.054516379 | 0.468569 | 0.581262 |
| RBM45     | 2q31.2    | 0.054484966  | 0.468826 | 0.581544 |
| TEX38     | 1p33      | -0.054468517 | 0.46896  | 0.58164  |
| FRMD1     | 6q27      | -0.054467615 | 0.468968 | 0.58164  |
| CLDN17    | 21q21.3   | -0.054462749 | 0.469008 | 0.58164  |
| LRIG2     | 1p13.2    | -0.054459858 | 0.469031 | 0.58164  |
| INSR      | 19p13.2   | -0.054457766 | 0.469048 | 0.58164  |
| B4GALNT1  | 12q13.3   | -0.054443119 | 0.469168 | 0.581752 |
| SNORA50A  | 16q21     | -0.054438959 | 0.469202 | 0.581758 |
| LRRTM1    | 2p12      | -0.054426367 | 0.469305 | 0.58185  |
| OR2T2     | 1q44      | -0.054420872 | 0.46935  | 0.581869 |
| LRIT1     | 10q23.1   | -0.054370521 | 0.469762 | 0.582319 |
| SLC22A25  | 11q12.3   | -0.054369379 | 0.469771 | 0.582319 |
| ACTR3     | 2q14.1    | 0.054340594  | 0.470007 | 0.582575 |
| SLC25A31  | 4q28.1    | -0.054309276 | 0.470263 | 0.582857 |
| IQCA1     | 2q37.2-q3 | -0.054290377 | 0.470418 | 0.583012 |
| TMEM130   | 7q22.1    | 0.054277823  | 0.47052  | 0.583103 |
| TUBB2A    | 6p25.2    | -0.054273638 | 0.470555 | 0.58311  |
| IL17F     | 6p12.2    | -0.054243147 | 0.470804 | 0.583383 |
| LOC286359 | 9q22.33   | -0.054218492 | 0.471006 | 0.583566 |
| SLC6A6    | 3p25.1    | 0.054215052  | 0.471035 | 0.583566 |
| NLRP10    | 11p15.4   | 0.054212849  | 0.471053 | 0.583566 |
| CD300C    | 17q25.1   | 0.054210896  | 0.471069 | 0.583566 |
| NLGN3     | Xq13.1    | -0.054187852 | 0.471258 | 0.583763 |
| FNDC8     | 17q12     | -0.054183667 | 0.471292 | 0.58377  |
| MCOLN1    | 19p13.2   | -0.054143912 | 0.471618 | 0.584122 |
| FAM107B   | 10p13     | -0.05414182  | 0.471635 | 0.584122 |
| COQ5      | 12q24.31  | -0.054127173 | 0.471755 | 0.584235 |
| WDR26     | 1q42.11-c | -0.054116712 | 0.471841 | 0.584305 |
| LOC100133 | 2q11.1    | 0.054107249  | 0.471918 | 0.584365 |
| WBP1L     | 10q24.32  | -0.054091603 | 0.472047 | 0.584487 |
| ADCK2     | 7q34      | -0.054083234 | 0.472115 | 0.584536 |
| PVR       | 19q13.31  | 0.054039294  | 0.472476 | 0.584946 |

|           |           |               |           |           |
|-----------|-----------|---------------|-----------|-----------|
| TP53TG5   | 20q13. 12 | -0. 054025565 | 0. 472589 | 0. 585024 |
| OR13H1    | Xq26. 2   | -0. 054024318 | 0. 472599 | 0. 585024 |
| RPSAP9    | 9q21. 13  | -0. 054018371 | 0. 472648 | 0. 585024 |
| SFRP5     | 10q24. 2  | 0. 054017353  | 0. 472656 | 0. 585024 |
| FAM9B     | Xp22. 31  | 0. 054013208  | 0. 47269  | 0. 58503  |
| CNTN6     | 3p26. 3   | -0. 05398468  | 0. 472924 | 0. 585284 |
| PA2G4P4   | 3q25. 31  | 0. 053970275  | 0. 473042 | 0. 585379 |
| COL18A1   | 21q22. 3  | 0. 053968154  | 0. 47306  | 0. 585379 |
| SULT6B1   | 2p22. 2   | -0. 053903666 | 0. 47359  | 0. 585999 |
| SNORA75   | 2q37. 1   | -0. 053884229 | 0. 473749 | 0. 58616  |
| ZNF404    | 19q13. 31 | 0. 053867721  | 0. 473885 | 0. 586292 |
| SIRT5     | 6p23      | 0. 053855167  | 0. 473988 | 0. 586383 |
| NOTUM     | 17q25. 3  | 0. 053840521  | 0. 474109 | 0. 586496 |
| THOC5     | 22q12. 2  | -0. 053817505 | 0. 474298 | 0. 586693 |
| MS4A8     | 11q12. 2  | -0. 053778824 | 0. 474616 | 0. 587051 |
| C1QC      | 1p36. 12  | -0. 053765196 | 0. 474728 | 0. 587153 |
| PCDHGC3   | 5q31. 3   | 0. 053737995  | 0. 474952 | 0. 587394 |
| CD79A     | 19q13. 2  | -0. 053708702 | 0. 475193 | 0. 587655 |
| TEX45     | 19p13. 2  | 0. 053700264  | 0. 475263 | 0. 587705 |
| C11ORF24  | 11q13. 2  | 0. 053691963  | 0. 475331 | 0. 587753 |
| FRG2DP    | 16p11. 1  | 0. 053670556  | 0. 475507 | 0. 587935 |
| GFPT1     | 2p13. 3   | -0. 053664763 | 0. 475555 | 0. 587957 |
| SLC26A7   | 8q21. 3   | -0. 053654301 | 0. 475641 | 0. 588028 |
| LINC01139 | 1q43      | -0. 053648083 | 0. 475692 | 0. 588054 |
| ASIC4     | 2q35      | 0. 053636171  | 0. 475791 | 0. 588139 |
| PHKG1     | 7p11. 2   | -0. 053606205 | 0. 476037 | 0. 588408 |
| SDF2L1    | 22q11. 21 | -0. 053601992 | 0. 476072 | 0. 588415 |
| MPZL3     | 11q23. 3  | 0. 053585253  | 0. 47621  | 0. 588549 |
| CCR10     | 17q21. 2  | 0. 053555596  | 0. 476452 | 0. 588811 |
| GAREM1    | 18q12. 1  | -0. 053539221 | 0. 47659  | 0. 588945 |
| PRNT      | 20p13     | 0. 05353186   | 0. 47665  | 0. 588979 |
| FAM135A   | 6q13      | -0. 053528759 | 0. 476676 | 0. 588979 |
| BTG4      | 11q23. 1  | 0. 053517211  | 0. 476771 | 0. 58906  |
| SLCO3A1   | 15q26. 1  | 0. 053497374  | 0. 476935 | 0. 589226 |
| FRMD6     | 14q22. 1  | 0. 053472266  | 0. 477142 | 0. 589445 |
| LINC00320 | 21q21. 1  | 0. 053399681  | 0. 477741 | 0. 590149 |
| PCDHB8    | 5q31. 3   | -0. 053373925 | 0. 477954 | 0. 590375 |
| C9ORF106  | 9q34. 11  | -0. 053367413 | 0. 478007 | 0. 590405 |
| SRSF9     | 12q24. 31 | -0. 053336263 | 0. 478265 | 0. 590635 |
| MAGOHB    | 12p13. 2  | 0. 053335244  | 0. 478273 | 0. 590635 |
| FAM131B   | 7q34      | 0. 05333417   | 0. 478282 | 0. 590635 |
| SERHL2    | 22q13. 2  | 0. 053317431  | 0. 47842  | 0. 590769 |
| CCDC127   | 5p15. 33  | -0. 0532986   | 0. 478576 | 0. 590925 |
| SMG1      | 16p12. 3  | -0. 053286046 | 0. 47868  | 0. 591016 |
| ATXN8OS   | 13q21. 33 | -0. 053277632 | 0. 478749 | 0. 591066 |
| MCL1      | 1q21. 2   | -0. 053258845 | 0. 478905 | 0. 591221 |
| TPTE2P6   | 13q12. 12 | 0. 053235453  | 0. 479098 | 0. 591389 |
| COL3A1    | 2q32. 2   | -0. 053233737 | 0. 479112 | 0. 591389 |
| GPSM3     | 6p21. 32  | -0. 053231645 | 0. 479129 | 0. 591389 |
| PRO0611   | 1p35. 2   | -0. 05320474  | 0. 479352 | 0. 591601 |
| OR2G3     | 1q44      | -0. 053203695 | 0. 479361 | 0. 591601 |
| TIMM8A    | Xq22. 1   | 0. 053122842  | 0. 48003  | 0. 59239  |
| CCDC71L   | 7q22. 3   | 0. 053106103  | 0. 480168 | 0. 592525 |
| LINC02731 | 11q25     | 0. 053100382  | 0. 480216 | 0. 592547 |

|          |           |              |          |          |
|----------|-----------|--------------|----------|----------|
| NR1I3    | 1q23.3    | 0.053087272  | 0.480324 | 0.592644 |
| CWC27    | 5q12.3    | 0.053078903  | 0.480393 | 0.592668 |
| RRM1     | 11p15.4   | 0.05307681   | 0.480411 | 0.592668 |
| CCDC160  | Xq26.2    | 0.05307418   | 0.480433 | 0.592668 |
| LTBP2    | 14q24.3   | -0.053064256 | 0.480515 | 0.592733 |
| HORMAD1  | 1q21.3    | -0.053051205 | 0.480623 | 0.59283  |
| NPPC     | 2q37.1    | -0.053025257 | 0.480838 | 0.593051 |
| DEXI     | 16p13.13  | 0.053022409  | 0.480861 | 0.593051 |
| OR2K2    | 9q31.3    | -0.052961312 | 0.481368 | 0.593638 |
| C11ORF42 | 11p15.4   | 0.05295408   | 0.481428 | 0.593676 |
| TRIM40   | 6p22.1    | 0.052913683  | 0.481763 | 0.594052 |
| SNX32    | 11q13.1   | -0.052903726 | 0.481845 | 0.594071 |
| ZNF525   | 19q13.42  | 0.052903145  | 0.48185  | 0.594071 |
| ACBD7    | 10p13     | 0.05290108   | 0.481867 | 0.594071 |
| HLA-DMA  | 6p21.32   | -0.052848744 | 0.482302 | 0.594555 |
| PNMA1    | 14q24.3   | 0.052846651  | 0.482319 | 0.594555 |
| RGS9BP   | 19q13.11  | 0.052827974  | 0.482474 | 0.594709 |
| CHST13   | 3q21.3    | 0.052797757  | 0.482725 | 0.594976 |
| UGT2A1   | 4q13.3    | 0.052794695  | 0.48275  | 0.594976 |
| S100A1   | 1q21.3    | -0.052779696 | 0.482875 | 0.595093 |
| OR4D6    | 11q12.1   | -0.052769669 | 0.482958 | 0.595159 |
| GUSBP11  | 22q11.23  | 0.05275668   | 0.483066 | 0.59524  |
| CCDC36   | 3p21.31   | -0.052754587 | 0.483083 | 0.59524  |
| TACO1    | 17q23.3   | 0.052750403  | 0.483118 | 0.595246 |
| THAP3    | 1p36.31   | 0.052727387  | 0.483309 | 0.595445 |
| L1TD1    | 1p31.3    | 0.05270173   | 0.483522 | 0.595671 |
| CTSC     | 11q14.2   | -0.052681355 | 0.483692 | 0.595827 |
| C10RF54  | 1q21.2    | -0.052679263 | 0.483709 | 0.595827 |
| IL9R     | Xq28 and  | -0.052666984 | 0.483811 | 0.595916 |
| CSMD1    | 8p23.2    | -0.052649283 | 0.483958 | 0.596061 |
| C9       | 5p13.1    | 0.052623389  | 0.484174 | 0.596289 |
| RFPL3    | 22q12.3   | 0.052610569  | 0.48428  | 0.596337 |
| GIMAP2   | 7q36.1    | -0.052610215 | 0.484283 | 0.596337 |
| TERC     | 3q26.2    | -0.052607986 | 0.484302 | 0.596337 |
| PAR6A    | 16q22.1   | -0.052589291 | 0.484457 | 0.596492 |
| SAA2     | 11p15.1   | -0.052581197 | 0.484525 | 0.596538 |
| NCKAP5L  | 12q13.12  | -0.052549537 | 0.484788 | 0.596814 |
| MAGEA6   | Xq28      | -0.052547012 | 0.484809 | 0.596814 |
| POGZ     | 1q21.3    | -0.052532798 | 0.484927 | 0.596923 |
| DUSP5    | 10q25.2   | 0.05249932   | 0.485206 | 0.59723  |
| TAF1B    | 2p25.1    | 0.052493043  | 0.485258 | 0.597257 |
| RPL21    | 13q12.2   | 0.052475749  | 0.485402 | 0.597398 |
| FAM199X  | Xq22.2    | -0.052453288 | 0.485589 | 0.597591 |
| GRAMD1A  | 19q13.11  | 0.05241981   | 0.485868 | 0.597897 |
| TEKT1    | 17p13.1   | -0.052412943 | 0.485926 | 0.597931 |
| WNT6     | 2q35      | 0.052407805  | 0.485968 | 0.597947 |
| RHD      | 1p36.11   | -0.052390434 | 0.486113 | 0.598088 |
| AGPAT3   | 21q22.3   | 0.052382148  | 0.486182 | 0.598136 |
| TSSC2    | 11p15.4   | -0.052352855 | 0.486426 | 0.59838  |
| MAGEA11  | Xq28      | -0.052351202 | 0.48644  | 0.59838  |
| C19ORF38 | 19p13.2   | -0.052342393 | 0.486514 | 0.598425 |
| RMST     | 12q23.1 1 | -0.05233963  | 0.486537 | 0.598425 |
| SNORD15B | 11q13.4   | 0.052324921  | 0.486659 | 0.598516 |
| ABCA2    | 9q34.3    | -0.052323562 | 0.486671 | 0.598516 |

|           |           |              |          |          |
|-----------|-----------|--------------|----------|----------|
| FAM181B   | 11q14.1   | -0.052319405 | 0.486705 | 0.598522 |
| SH3BGRL2  | 6q14.1    | -0.052300546 | 0.486863 | 0.598679 |
| NPC2      | 14q24.3   | 0.052296361  | 0.486898 | 0.598685 |
| GUCA2B    | 1p34.2    | 0.052292456  | 0.48693  | 0.598688 |
| TMEM215   | 9p21.1    | 0.052271783  | 0.487103 | 0.59883  |
| CDKN2A-DT | 9p21.3    | 0.052271443  | 0.487105 | 0.59883  |
| MAP3K9    | 14q24.2   | -0.05225033  | 0.487282 | 0.59901  |
| CDY1B     | Yq11.23   | -0.05222     | 0.487535 | 0.5991   |
| OR2Y1     | 5q35.3    | -0.05222     | 0.487535 | 0.5991   |
| RNASE12   | 14q11.2   | -0.05222     | 0.487535 | 0.5991   |
| MT4       | 16q13     | 0.05222      | 0.487535 | 0.5991   |
| OR5B3     | 11q12.1   | 0.05222      | 0.487535 | 0.5991   |
| SPACA1    | 6q15      | 0.05222      | 0.487535 | 0.5991   |
| NLRP12    | 19q13.42  | 0.052173986  | 0.487919 | 0.599535 |
| SNORA7B   | 3q21.3    | 0.052147239  | 0.488142 | 0.599727 |
| AHSP      | 16p11.2   | -0.052145855 | 0.488154 | 0.599727 |
| FFAR4     | 10q23.33  | -0.052143619 | 0.488173 | 0.599727 |
| RBM46     | 4q32.1    | -0.05213907  | 0.488211 | 0.599727 |
| SLC25A25  | 9q34.11   | -0.052137342 | 0.488225 | 0.599727 |
| SELENOM   | 22q12.2   | -0.052077737 | 0.488723 | 0.600302 |
| EARS2     | 16p12.2   | 0.05205574   | 0.488907 | 0.60049  |
| CYB5R3    | 22q13.2   | 0.052013893  | 0.489257 | 0.600868 |
| COG8      | 16q22.1   | -0.052011801 | 0.489274 | 0.600868 |
| ASB17     | 1p31.1    | -0.051994937 | 0.489415 | 0.600975 |
| SCARNA21  | 17p13.1   | -0.051994153 | 0.489422 | 0.600975 |
| HTRA4     | 8p11.22   | 0.051982617  | 0.489518 | 0.601043 |
| PDSS1     | 10p12.1   | 0.051980416  | 0.489537 | 0.601043 |
| CDC25A    | 3p21.31   | 0.051965769  | 0.489659 | 0.601156 |
| ZNF519    | 18p11.21  | -0.051959492 | 0.489712 | 0.601184 |
| PER3      | 1p36.23   | -0.051932291 | 0.489939 | 0.601401 |
| CRISP3    | 6p12.3    | 0.05193115   | 0.489949 | 0.601401 |
| LINC02203 | 15q11.2   | -0.051922916 | 0.490018 | 0.601449 |
| LYZ       | 12q15     | 0.051909275  | 0.490132 | 0.601552 |
| LINC00032 | 9p21.2    | 0.051905213  | 0.490166 | 0.601557 |
| HSD17B12  | 11p11.2   | 0.051863244  | 0.490518 | 0.601951 |
| RETREG2   | 2q35      | 0.051838135  | 0.490728 | 0.602172 |
| NCSTN     | 1q23.2    | -0.051827674 | 0.490815 | 0.602175 |
| SEZ6L2    | 16p11.2   | 0.051827674  | 0.490815 | 0.602175 |
| CMSS1     | 3q12.1    | -0.051823489 | 0.490851 | 0.602175 |
| MORF4L1   | 15q25.1   | -0.051823489 | 0.490851 | 0.602175 |
| KRTAP6-3  | 21q22.11  | -0.051819484 | 0.490884 | 0.602179 |
| PPP6R3    | 11q13.2   | -0.051815119 | 0.490921 | 0.602187 |
| MTCL1     | 18p11.22  | -0.051794196 | 0.491096 | 0.602355 |
| SNX17     | 2p23.3    | 0.051790011  | 0.491131 | 0.602355 |
| ZNF446    | 19q13.43  | 0.051787919  | 0.491149 | 0.602355 |
| APTX      | 9p21.1    | -0.05177118  | 0.491289 | 0.60249  |
| KIAA1671  | 22q11.23  | -0.051764903 | 0.491341 | 0.602518 |
| OR10G2    | 14q11.2   | 0.051756263  | 0.491414 | 0.60257  |
| TAS2R39   | 7q34      | 0.051750529  | 0.491462 | 0.602592 |
| SNTA1     | 20q11.21  | -0.051708409 | 0.491815 | 0.602988 |
| KAZN      | 1p36.21   | -0.051637269 | 0.492412 | 0.603673 |
| COQ6      | 14q24.3   | 0.051633084  | 0.492447 | 0.603673 |
| WDR12     | 2q33.2    | 0.051630992  | 0.492465 | 0.603673 |
| KIAA1217  | 10p12.2-1 | 0.051624715  | 0.492517 | 0.603701 |

|           |            |              |          |          |
|-----------|------------|--------------|----------|----------|
| KCNQ3     | 8q24. 22   | -0.051618546 | 0.492569 | 0.603719 |
| EFCAB14   | 1p33       | -0.051612161 | 0.492623 | 0.603719 |
| WDR3      | 1p12       | -0.051612161 | 0.492623 | 0.603719 |
| SLC38A3   | 3p21. 31   | -0.051576618 | 0.492921 | 0.604047 |
| OR2F2     | 7q35       | -0.05155008  | 0.493144 | 0.604283 |
| SLC16A9   | 10q21. 2   | -0.051522189 | 0.493378 | 0.604533 |
| PLPP7     | 9q34. 13   | -0.051515912 | 0.493431 | 0.604561 |
| ANGPTL8   | 19p13. 2   | -0.051503073 | 0.493539 | 0.604656 |
| TAS2R14   | 12p13. 2   | 0.051478789  | 0.493743 | 0.604869 |
| SNORA40   | 11q21      | -0.051474673 | 0.493777 | 0.604874 |
| CCDC88C   | 14q32. 11- | 0.051428033  | 0.494169 | 0.605317 |
| C20ORF27  | 20p13      | 0.051358986  | 0.49475  | 0.605992 |
| TAS2R13   | 12p13. 2   | -0.051351046 | 0.494817 | 0.606036 |
| PLPPR5    | 1p21. 3    | 0.051339299  | 0.494916 | 0.60612  |
| PROKR1    | 2p13. 3    | -0.051331258 | 0.494983 | 0.606166 |
| DCAF12L1  | Xq25       | 0.05128316   | 0.495388 | 0.606625 |
| MYO15A    | 17p11. 2   | 0.051277384  | 0.495437 | 0.606647 |
| C20ORF20E | 20q11. 21  | 0.051255653  | 0.49562  | 0.606803 |
| TLX1NB    | 10q24. 31  | 0.051255011  | 0.495625 | 0.606803 |
| ANAPC13   | 3q22. 2    | -0.051245998 | 0.495701 | 0.606851 |
| SNORA3A   | 11p15. 4   | 0.051243132  | 0.495725 | 0.606851 |
| KIAA0754  | 1p34. 3    | -0.051225075 | 0.495877 | 0.606985 |
| RAN       | 12q24. 33  | 0.051222982  | 0.495895 | 0.606985 |
| AKAP7     | 6q23. 2    | -0.051174858 | 0.4963   | 0.607444 |
| MIPOL1    | 14q13. 3-c | 0.051164396  | 0.496389 | 0.607515 |
| CAPZA2    | 7q31. 2    | -0.051160212 | 0.496424 | 0.60752  |
| DUSP27    | 1q24. 1    | 0.051155835  | 0.496461 | 0.607528 |
| ATAD1     | 10q23. 31  | 0.051145565  | 0.496547 | 0.607597 |
| AGAP3     | 7q36. 1    | 0.051139288  | 0.4966   | 0.607625 |
| OR52R1    | 11p15. 4   | -0.051133513 | 0.496649 | 0.607647 |
| SMCO3     | 12p12. 3   | -0.051120457 | 0.496759 | 0.607745 |
| TREML5P   | 6p21. 1    | 0.051098808  | 0.496942 | 0.607929 |
| PPP2R3A   | 3q22. 2-q2 | 0.051095349  | 0.496971 | 0.607929 |
| TSSK4     | 14q12      | -0.051086979 | 0.497041 | 0.607978 |
| OR2T35    | 1q44       | -0.051060982 | 0.497261 | 0.608209 |
| SLC1A7    | 1p32. 3    | -0.050992823 | 0.497836 | 0.608875 |
| LGALS14   | 19q13. 2   | 0.050931078  | 0.498357 | 0.609476 |
| SMIM26    | 20p11. 23  | 0.050913314  | 0.498507 | 0.609606 |
| COL1A2    | 7q21. 3    | 0.050911221  | 0.498525 | 0.609606 |
| F9        | Xq27. 1    | 0.050894189  | 0.498669 | 0.609726 |
| ABHD8     | 19p13. 11  | -0.05089239  | 0.498684 | 0.609726 |
| SLC2A8    | 9q33. 3    | -0.050871467 | 0.498861 | 0.609905 |
| 1-Mar     | 1q41       | 0.050812881  | 0.499356 | 0.610473 |
| TTI2      | 8p12       | 0.050806603  | 0.499409 | 0.610501 |
| TCHH      | 1q21. 3    | -0.050781495 | 0.499621 | 0.610707 |
| SLC38A10  | 17q25. 3   | 0.050779403  | 0.499639 | 0.610707 |
| MAGEB10   | Xp21. 3    | -0.050769445 | 0.499723 | 0.610773 |
| BBS2      | 16q13      | -0.050756387 | 0.499833 | 0.610833 |
| EGR1      | 5q31. 2    | -0.050756387 | 0.499833 | 0.610833 |
| BRCA2     | 13q13. 1   | 0.050735463  | 0.50001  | 0.611012 |
| LCE2B     | 1q21. 3    | -0.050727701 | 0.500076 | 0.611024 |
| LOC10013E | 1p36. 33   | 0.050727094  | 0.500081 | 0.611024 |
| OR52N5    | 11p15. 4   | -0.050708706 | 0.500237 | 0.611176 |
| MAB21L3   | 1p13. 1    | -0.050688636 | 0.500407 | 0.611346 |

|           |           |              |          |          |
|-----------|-----------|--------------|----------|----------|
| CXADR     | 21q21.1   | 0.050674785  | 0.500524 | 0.611452 |
| CYGB      | 17q25.1   | -0.050662231 | 0.50063  | 0.611528 |
| RIMS4     | 20q13.12  | -0.050660218 | 0.500647 | 0.611528 |
| ZNF532    | 18q21.32  | -0.050651769 | 0.500719 | 0.611578 |
| TNFRSF9   | 1p36.23   | -0.050643506 | 0.500789 | 0.611626 |
| TOMM6     | 6p21.1    | 0.050622476  | 0.500967 | 0.611806 |
| TMPRSS15  | 21q21.1   | 0.05061351   | 0.501043 | 0.611862 |
| PRG2      | 11q12.1   | 0.050580735  | 0.50132  | 0.612155 |
| LCE1A     | 1q21.3    | 0.050577591  | 0.501347 | 0.612155 |
| SIGLEC7   | 19q13.41  | -0.050574352 | 0.501374 | 0.612155 |
| PPP1R27   | 17q25.3   | 0.050535813  | 0.501701 | 0.612516 |
| HLA-DOB   | 6p21.32   | -0.050530412 | 0.501747 | 0.612534 |
| SPATC1L   | 21q22.3   | 0.050501119  | 0.501995 | 0.6128   |
| STOML2    | 9p13.3    | 0.05049275   | 0.502066 | 0.612849 |
| PRLH      | 2q37.3    | -0.05048898  | 0.502098 | 0.612851 |
| NBPF10    | 1q21.1    | -0.050455088 | 0.502385 | 0.613164 |
| IKZF2     | 2q34      | 0.05041324   | 0.50274  | 0.61356  |
| LAMTOR3   | 4q23      | -0.050402779 | 0.502829 | 0.613631 |
| TMEM272   | 13q14.3   | -0.050384053 | 0.502988 | 0.613787 |
| SAP130    | 2q14.3    | 0.050379763  | 0.503024 | 0.613794 |
| KLHL31    | 6p12.1    | -0.05030653  | 0.503646 | 0.614485 |
| NKX2-1    | 14q13.3   | 0.050305843  | 0.503652 | 0.614485 |
| DPYSL4    | 10q26.3   | -0.050273053 | 0.50393  | 0.61473  |
| SAA4      | 11p15.1   | 0.050272123  | 0.503938 | 0.61473  |
| PTGDS     | 9q34.3    | -0.050264683 | 0.504002 | 0.61473  |
| ALDH7A1   | 5q23.2    | 0.050260498  | 0.504037 | 0.61473  |
| CST3      | 20p11.21  | -0.050260498 | 0.504037 | 0.61473  |
| PPP2CB    | 8p12      | 0.050260498  | 0.504037 | 0.61473  |
| FAM66E    | 8p23.1    | -0.050250613 | 0.504121 | 0.614795 |
| EIF3D     | 22q12.3   | 0.05024376   | 0.504179 | 0.614828 |
| PRKAR1B   | 7p22.3    | -0.050221816 | 0.504366 | 0.615018 |
| LARGE2    | 11p11.2   | -0.050214467 | 0.504428 | 0.615057 |
| P2RX2     | 12q24.33  | -0.050188052 | 0.504653 | 0.615293 |
| SNAP29    | 22q11.21  | -0.050172619 | 0.504784 | 0.615399 |
| PRXL2A    | 10q23.1   | 0.050170527  | 0.504802 | 0.615399 |
| SLC36A3   | 5q33.1    | -0.050123003 | 0.505206 | 0.615855 |
| ACP2      | 11p11.2 1 | -0.050116126 | 0.505264 | 0.615888 |
| CDH2      | 18q12.1   | -0.050095202 | 0.505442 | 0.616    |
| POSTN     | 13q13.3   | 0.050088925  | 0.505496 | 0.616    |
| MTREX     | 5q11.2    | -0.050086833 | 0.505514 | 0.616    |
| ZNF680    | 7q11.21   | -0.050086833 | 0.505514 | 0.616    |
| CAD       | 2p23.3    | -0.050080556 | 0.505567 | 0.616    |
| ARSI      | 5q32      | 0.050078463  | 0.505585 | 0.616    |
| PPF1BP1   | 12p11.23- | -0.050078463 | 0.505585 | 0.616    |
| TMEM18    | 2p25.3    | 0.050076371  | 0.505603 | 0.616    |
| RTL8B     | Xq26.3    | -0.050068002 | 0.505674 | 0.616049 |
| RHCG      | 15q26.1   | 0.050050637  | 0.505822 | 0.616192 |
| XAGE3     | Xp11.22   | 0.050047015  | 0.505853 | 0.616192 |
| THBS2     | 6q27      | 0.050034524  | 0.505959 | 0.616268 |
| NIPSNAP3A | 9q31.1    | 0.050032432  | 0.505977 | 0.616268 |
| PRM1      | 16p13.13  | -0.049997366 | 0.506275 | 0.61658  |
| MYCNOS    | 2p24.3    | 0.049995075  | 0.506295 | 0.61658  |
| LRRC74A   | 14q24.3   | -0.049973996 | 0.506474 | 0.616761 |
| CATSPER4  | 1p36.11   | 0.049962044  | 0.506576 | 0.616848 |



|            |           |               |           |           |
|------------|-----------|---------------|-----------|-----------|
| CCL26      | 7q11. 23  | -0. 049944553 | 0. 506725 | 0. 616991 |
| ZNF354B    | 5q35. 3   | -0. 049936183 | 0. 506796 | 0. 617025 |
| RBMXL1     | 1p22. 2   | -0. 049934091 | 0. 506814 | 0. 617025 |
| SCGB1D4    | 11q12. 3  | 0. 049910223  | 0. 507018 | 0. 617235 |
| PDHB       | 3p14. 3   | -0. 049869228 | 0. 507367 | 0. 617622 |
| FAM13A-AS1 | 4q22. 1   | 0. 049858766  | 0. 507456 | 0. 617693 |
| ZBTB22     | 6p21. 32  | -0. 049850397 | 0. 507528 | 0. 617743 |
| CDC42EP4   | 17q25. 1  | 0. 049844119  | 0. 507581 | 0. 61777  |
| ALG12      | 22q13. 33 | -0. 049837842 | 0. 507635 | 0. 617798 |
| OR5AP2     | 11q12. 1  | 0. 049811419  | 0. 50786  | 0. 618034 |
| PPP2CA     | 5q31. 1   | 0. 049791811  | 0. 508027 | 0. 618184 |
| SLC37A2    | 11q24. 2  | 0. 049789718  | 0. 508045 | 0. 618184 |
| OR5AK2     | 11q12. 1  | -0. 049770627 | 0. 508208 | 0. 618306 |
| IFNA5      | 9p21. 3   | 0. 049770116  | 0. 508212 | 0. 618306 |
| HCAR2      | 12q24. 31 | 0. 04976359   | 0. 508268 | 0. 618306 |
| MYH8       | 17p13. 1  | -0. 049763513 | 0. 508269 | 0. 618306 |
| LATS2      | 13q12. 11 | -0. 04975624  | 0. 508331 | 0. 618344 |
| TCTN2      | 12q24. 31 | -0. 049747871 | 0. 508402 | 0. 618355 |
| RNASEH1    | 2p25. 3   | 0. 049747871  | 0. 508402 | 0. 618355 |
| CACNG4     | 17q24. 2  | 0. 049741594  | 0. 508456 | 0. 618383 |
| OR6C70     | 12q13. 2  | 0. 049735857  | 0. 508505 | 0. 618405 |
| UBE4A      | 11q23. 3  | -0. 049691377 | 0. 508884 | 0. 618829 |
| KANK2      | 19p13. 2  | 0. 049676731  | 0. 509009 | 0. 618938 |
| APOC3      | 11q23. 3  | -0. 049671033 | 0. 509058 | 0. 618938 |
| FRG1       | 4q35. 2   | 0. 049668361  | 0. 509081 | 0. 618938 |
| LOC283731  | 15q24. 1  | 0. 049666373  | 0. 509098 | 0. 618938 |
| EHMT2      | 6p21. 33  | 0. 049659992  | 0. 509152 | 0. 61894  |
| ZNF479     | 7p11. 2   | -0. 049658902 | 0. 509162 | 0. 61894  |
| PRSS50     | 3p21. 31  | 0. 049645605  | 0. 509275 | 0. 619041 |
| G6PC3      | 17q21. 31 | -0. 049597221 | 0. 509689 | 0. 619505 |
| CALHM1     | 10q24. 33 | -0. 049584898 | 0. 509794 | 0. 619596 |
| GSK3B      | 3q13. 33  | -0. 049557467 | 0. 510028 | 0. 619843 |
| RANBP17    | 5q35. 1   | 0. 049517712  | 0. 510368 | 0. 620218 |
| DCAF5      | 14q24. 1  | -0. 049509342 | 0. 51044  | 0. 620267 |
| HEXA-AS1   | 15q23     | -0. 049482142 | 0. 510672 | 0. 620512 |
| UBAP2      | 9p13. 3   | -0. 049475865 | 0. 510726 | 0. 62054  |
| TAB1       | 22q13. 1  | -0. 049467495 | 0. 510798 | 0. 620589 |
| NUP98      | 11p15. 4  | -0. 049454941 | 0. 510905 | 0. 620682 |
| HMX1       | 4p16. 1   | -0. 04944245  | 0. 511012 | 0. 620774 |
| USP21      | 1q23. 3   | 0. 049438202  | 0. 511048 | 0. 620781 |
| C1QL4      | 12q13. 12 | -0. 049428568 | 0. 511131 | 0. 620843 |
| ADCY7      | 16q12. 1  | 0. 049398447  | 0. 511389 | 0. 621118 |
| ZSCAN20    | 1p35. 1   | -0. 049375432 | 0. 511586 | 0. 62132  |
| ARFGAP2    | 11p11. 2  | 0. 049371247  | 0. 511621 | 0. 621326 |
| A1BG       | 19q13. 43 | -0. 049360785 | 0. 511711 | 0. 621397 |
| SIGLEC1    | 20p13     | 0. 049350323  | 0. 511801 | 0. 621468 |
| NDUFA3     | 19q13. 42 | 0. 049337769  | 0. 511908 | 0. 621509 |
| TSBP1      | 6p21. 32  | -0. 049331891 | 0. 511958 | 0. 621509 |
| MRPS33     | 7q34      | -0. 0493294   | 0. 51198  | 0. 621509 |
| PHF6       | Xq26. 2   | -0. 04932103  | 0. 512051 | 0. 621509 |
| SYVN1      | 11q13. 1  | 0. 04932103   | 0. 512051 | 0. 621509 |
| GPR139     | 16p12. 3  | -0. 049318889 | 0. 51207  | 0. 621509 |
| RBMXL2     | 11p15. 4  | 0. 049314564  | 0. 512107 | 0. 621509 |
| SNORA59B   | 17p11. 2  | 0. 049310359  | 0. 512143 | 0. 621509 |

|          |          |              |          |          |
|----------|----------|--------------|----------|----------|
| CLEC18A  | 16q22.1  | 0.049308476  | 0.512159 | 0.621509 |
| FAM47A   | Xp21.1   | -0.049308155 | 0.512162 | 0.621509 |
| SMG1P2   | 16p11.2  | 0.049306384  | 0.512177 | 0.621509 |
| SMIM3    | 5q33.1   | 0.049295922  | 0.512267 | 0.62158  |
| PCOLCE   | 7q22.1   | 0.049287553  | 0.512338 | 0.621616 |
| TAS2R19  | 12p13.2  | -0.049285275 | 0.512358 | 0.621616 |
| OR4K14   | 14q11.2  | 0.049251528  | 0.512647 | 0.621929 |
| NUDT16L1 | 16p13.3  | 0.049235244  | 0.512787 | 0.622023 |
| SLITRK5  | 13q31.2  | -0.049235244 | 0.512787 | 0.622023 |
| TFEB     | 6p21.1   | -0.049220597 | 0.512912 | 0.622137 |
| ZNF285   | 19q13.31 | 0.049208043  | 0.51302  | 0.62223  |
| SEC31B   | 10q24.31 | -0.049191304 | 0.513163 | 0.622366 |
| LY86     | 6p25.1   | -0.049185027 | 0.513217 | 0.622394 |
| ZFYVE27  | 10q24.2  | 0.049118072  | 0.513791 | 0.623052 |
| MAGEF1   | 3q27.1   | 0.049090871  | 0.514025 | 0.623298 |
| NFAT5    | 16q22.1  | -0.049082502 | 0.514097 | 0.623347 |
| TMEM256  | 17p13.1  | -0.049061578 | 0.514276 | 0.623527 |
| CT47B1   | Xq24     | -0.049049802 | 0.514377 | 0.623612 |
| EGFL6    | Xp22.2   | 0.049042747  | 0.514438 | 0.623647 |
| EMC2     | 8q23.1   | 0.049034377  | 0.51451  | 0.623697 |
| SLC35D3  | 6q23.3   | -0.049017895 | 0.514651 | 0.62383  |
| UBA52    | 19p13.11 | 0.049007177  | 0.514743 | 0.623904 |
| CBWD3    | 9q21.11  | 0.04899253   | 0.514869 | 0.624019 |
| PACS2    | 14q32.33 | 0.048984161  | 0.514941 | 0.624068 |
| TIGD2    | 4q22.1   | 0.048977884  | 0.514995 | 0.624096 |
| OR8G5    | 11q24.2  | 0.048968287  | 0.515078 | 0.624158 |
| C10RF74  | 1q32.2   | -0.048942314 | 0.515301 | 0.62439  |
| PRDX2    | 19p13.13 | 0.048919298  | 0.515499 | 0.624592 |
| SPPL2C   | 17q21.31 | 0.048900084  | 0.515664 | 0.624754 |
| AKAP17A  | Xp22.33  | -0.048879543 | 0.51584  | 0.624907 |
| GNAT3    | 7q21.11  | 0.048878129  | 0.515852 | 0.624907 |
| FANCE    | 6p21.31  | 0.04885025   | 0.516092 | 0.62516  |
| LILRA3   | 19q13.4  | -0.048800519 | 0.51652  | 0.62564  |
| UNC93A   | 6q27     | 0.048796086  | 0.516558 | 0.625648 |
| FGF1     | 5q31.3   | -0.048785387 | 0.51665  | 0.625722 |
| TTLL9    | 20q11.21 | -0.048768674 | 0.516794 | 0.625858 |
| DNAH11   | 7p15.3   | 0.048745632  | 0.516992 | 0.62606  |
| HERPUD2  | 7p14.2   | -0.04873517  | 0.517082 | 0.626132 |
| MEOX1    | 17q21.31 | -0.048714247 | 0.517263 | 0.626312 |
| SNORA70  | Xq28     | -0.048689746 | 0.517474 | 0.626529 |
| NOSTRIN  | 2q24.3   | 0.04866403   | 0.517695 | 0.626759 |
| CD164    | 6q21     | -0.048653569 | 0.517785 | 0.626793 |
| MYO1G    | 7p13     | -0.048653569 | 0.517785 | 0.626793 |
| RPPH1    | 14q11.2  | -0.048638947 | 0.517911 | 0.626907 |
| KCND2    | 7q31.31  | -0.048624276 | 0.518038 | 0.626984 |
| RPUSD2   | 15q15.1  | 0.048624276  | 0.518038 | 0.626984 |
| FCGR1B   | 1p11.2   | -0.04860126  | 0.518236 | 0.627186 |
| TMEM121  | 14q32.33 | -0.048567782 | 0.518525 | 0.627487 |
| OGA      | 10q24.32 | 0.048561505  | 0.518579 | 0.627487 |
| PAIP1    | 5p12     | -0.048561505 | 0.518579 | 0.627487 |
| RPS10    | 6p21.31  | -0.048548951 | 0.518687 | 0.62758  |
| FAM122B  | Xq26.3   | -0.048534304 | 0.518813 | 0.627695 |
| CEP57    | 11q21    | -0.048496642 | 0.519138 | 0.62805  |
| ADCY6    | 12q13.12 | -0.048433896 | 0.519679 | 0.628667 |

|            |          |              |          |          |
|------------|----------|--------------|----------|----------|
| MYH7B      | 20q11.22 | -0.048383655 | 0.520113 | 0.629121 |
| PLAC8L1    | 5q32     | -0.048382406 | 0.520124 | 0.629121 |
| RARRES2    | 7q36.1   | 0.04837947   | 0.520149 | 0.629121 |
| NT5C3B     | 17q21.2  | -0.048360639 | 0.520312 | 0.62928  |
| MANBA      | 4q24     | -0.048345992 | 0.520438 | 0.629388 |
| ASPDH      | 19q13.33 | -0.04834262  | 0.520468 | 0.629388 |
| PRDM7      | 16q24.3  | -0.048339301 | 0.520496 | 0.629388 |
| GBP1P1     | 1p22.2   | -0.048323103 | 0.520636 | 0.629519 |
| EXT1       | 8q24.11  | 0.04829996   | 0.520836 | 0.629723 |
| C2ORF50    | 2p25.1   | 0.048294755  | 0.520881 | 0.629739 |
| PBLD       | 10q21.3  | -0.048283221 | 0.520981 | 0.629822 |
| CUZD1      | 10q26.13 | -0.048279037 | 0.521017 | 0.629827 |
| CRYBG1     | 6q21     | 0.048251836  | 0.521252 | 0.630052 |
| MINDY1     | 1q21.3   | -0.048247651 | 0.521288 | 0.630052 |
| LPCAT3     | 12p13.31 | -0.048245559 | 0.521306 | 0.630052 |
| ZNF322P1   | 9q22.33  | -0.048239307 | 0.52136  | 0.630052 |
| HADHA      | 2p23.3   | 0.048239282  | 0.521361 | 0.630052 |
| DCTN6      | 8p12     | 0.048233005  | 0.521415 | 0.63008  |
| PIH1D2     | 11q23.1  | 0.048224635  | 0.521487 | 0.630129 |
| IL20       | 1q32.1   | -0.048210218 | 0.521612 | 0.630242 |
| ZNF562     | 19p13.2  | -0.048203712 | 0.521668 | 0.630271 |
| DZIP1L     | 3q22.3   | -0.048189065 | 0.521795 | 0.630386 |
| ELF5       | 11p13    | 0.048181406  | 0.521861 | 0.630397 |
| LLCFC1     | 7q34     | 0.048180729  | 0.521867 | 0.630397 |
| ACVR2B-AS3 | 3p22.2   | -0.048166049 | 0.521994 | 0.630513 |
| TMEM176B   | 7q36.1   | 0.048155588  | 0.522084 | 0.630584 |
| TRPV6      | 7q34     | 0.048139101  | 0.522227 | 0.630718 |
| PCSK5      | 9q21.13  | 0.048124202  | 0.522356 | 0.630819 |
| GOLT1A     | 1q32.1   | 0.04812211   | 0.522374 | 0.630819 |
| TENT5B     | 1p36.11  | 0.048115833  | 0.522428 | 0.630847 |
| RFC3       | 13q13.2  | -0.048103279 | 0.522537 | 0.63094  |
| KRTAP17-1  | 17q21.2  | -0.048072943 | 0.5228   | 0.631219 |
| MS4A10     | 11q12.2  | -0.048067209 | 0.522849 | 0.631219 |
| TMEM200C   | 18p11.31 | -0.048065616 | 0.522863 | 0.631219 |
| CHAD       | 17q21.33 | -0.048055155 | 0.522954 | 0.631242 |
| SLAMF7     | 1q23.3   | 0.048055155  | 0.522954 | 0.631242 |
| SPDYE7P    | 7q11.23  | 0.048048877  | 0.523008 | 0.631242 |
| WDR59      | 16q23.1  | 0.048048877  | 0.523008 | 0.631242 |
| SHMT1      | 17p11.2  | -0.048034231 | 0.523135 | 0.631357 |
| IL5        | 5q31.1   | -0.048023977 | 0.523224 | 0.631412 |
| ARL2       | 11q13.1  | 0.048021677  | 0.523244 | 0.631412 |
| HELT       | 4q35.1   | 0.047982397  | 0.523584 | 0.631784 |
| TNFSF12    | 17p13.1  | -0.047975645 | 0.523642 | 0.631795 |
| TMEM125    | 1p34.2   | 0.04797146   | 0.523679 | 0.631795 |
| ADGRE3     | 19p13.12 | -0.047964589 | 0.523738 | 0.631795 |
| EBF4       | 20p13    | -0.047963091 | 0.523751 | 0.631795 |
| RPL19P12   | 7q22.1   | -0.047963091 | 0.523751 | 0.631795 |
| SVBP       | 1p34.2   | -0.047933798 | 0.524005 | 0.632063 |
| RPL23AP32  | 2p16.2   | -0.047928095 | 0.524054 | 0.632085 |
| SNORA25    | 11q21    | 0.047915421  | 0.524164 | 0.632179 |
| FUT9       | 6q16.1   | 0.047893278  | 0.524356 | 0.632348 |
| CDK9       | 9q34.11  | 0.047891951  | 0.524368 | 0.632348 |
| GARS       | 7p14.3   | 0.047885674  | 0.524422 | 0.632366 |
| HERC5      | 4q22.1   | -0.047879397 | 0.524477 | 0.632366 |

|                       |          |              |          |          |
|-----------------------|----------|--------------|----------|----------|
| KCNIP2                | 10q24.32 | -0.047873119 | 0.524531 | 0.632366 |
| POLR2F                | 22q13.1  | 0.047868935  | 0.524567 | 0.632366 |
| OR4F17                | 19p13.3  | 0.047868333  | 0.524573 | 0.632366 |
| OR51D1                | 11p15.4  | -0.047868333 | 0.524573 | 0.632366 |
| C14ORF28              | 14q21.2  | -0.047837549 | 0.52484  | 0.63265  |
| SMIM12                | 1p34.3   | 0.047831272  | 0.524894 | 0.632677 |
| MSANTD1               | 4p16.3   | -0.047823003 | 0.524966 | 0.632716 |
| DVL3                  | 3q27.1   | 0.047818718  | 0.525003 | 0.632716 |
| TRIM36                | 5q22.3   | -0.047816626 | 0.525021 | 0.632716 |
| AMH                   | 19p13.3  | 0.047800874  | 0.525158 | 0.632843 |
| SVIL                  | 10p11.23 | -0.047787333 | 0.525275 | 0.632946 |
| DLGAP4                | 20q11.23 | -0.047770594 | 0.525421 | 0.633083 |
| CCSER1                | 4q22.1   | -0.047766409 | 0.525457 | 0.633089 |
| PGLYRP4               | 1q21.3   | 0.047755411  | 0.525552 | 0.633165 |
| UIMC1                 | 5q35.2   | 0.047709916  | 0.525947 | 0.633579 |
| SLC4A1AP              | 2p23.3   | 0.047701546  | 0.52602  | 0.633579 |
| CRYBA4                | 22q12.1  | -0.047701342 | 0.526022 | 0.633579 |
| GAL3ST2               | 2q37.3   | 0.047701255  | 0.526023 | 0.633579 |
| IL31                  | 12q24.31 | 0.047651952  | 0.526451 | 0.634057 |
| CDH9                  | 5p14.1   | -0.047648233 | 0.526483 | 0.634057 |
| EBLN2                 | 3p13     | 0.047642064  | 0.526537 | 0.634084 |
| ARL11                 | 13q14.2  | -0.047634591 | 0.526602 | 0.634099 |
| LUZP4                 | Xq23     | -0.047631829 | 0.526626 | 0.634099 |
| SCARNA5               | 2q37.1   | 0.047629648  | 0.526645 | 0.634099 |
| LIN7C                 | 11p14.1  | -0.047622037 | 0.526711 | 0.634141 |
| TSSK1B                | 5q22.2   | -0.047609718 | 0.526818 | 0.634231 |
| OR9A2                 | 7q34     | 0.04759757   | 0.526923 | 0.634289 |
| DDX42                 | 17q23.3  | -0.047596928 | 0.526929 | 0.634289 |
| C7ORF50               | 7p22.3   | 0.047576005  | 0.527111 | 0.634469 |
| OPRPN                 | 4q13.3   | -0.047559984 | 0.52725  | 0.634568 |
| PTGIS                 | 20q13.13 | -0.047559266 | 0.527256 | 0.634568 |
| COL18A1- <del>A</del> | 21q22.3  | -0.047551462 | 0.527324 | 0.634612 |
| CTRB2                 | 16q23.1  | -0.047547549 | 0.527358 | 0.634614 |
| RBP4                  | 10q23.33 | -0.047540435 | 0.52742  | 0.634651 |
| ADAMTS15              | 11q24.3  | -0.047527881 | 0.527529 | 0.634714 |
| ABHD12B               | 14q22.1  | -0.047527044 | 0.527537 | 0.634714 |
| LMAN1L                | 15q24.1  | 0.047487001  | 0.527885 | 0.635095 |
| NBPF7                 | 1p12     | -0.047475058 | 0.527989 | 0.635182 |
| CACNG3                | 16p12.1  | -0.047413594 | 0.528524 | 0.635787 |
| MATK                  | 19p13.3  | -0.047391877 | 0.528713 | 0.635912 |
| SOCS1                 | 16p13.13 | -0.047387693 | 0.528749 | 0.635912 |
| PFKFB3                | 10p15.1  | 0.0473856    | 0.528767 | 0.635912 |
| TACR3                 | 4q24     | -0.047385245 | 0.528771 | 0.635912 |
| OR10J3                | 1q23.2   | -0.047383396 | 0.528787 | 0.635912 |
| PDZK1P1               | 1q21.2   | -0.047379373 | 0.528822 | 0.635916 |
| ARFIP2                | 11p15.4  | 0.047368862  | 0.528913 | 0.635961 |
| RPS5                  | 19q13.43 | 0.047362584  | 0.528968 | 0.635961 |
| MRPS26                | 20p13    | -0.047360492 | 0.528986 | 0.635961 |
| ZFP69                 | 1p34.2   | -0.047360492 | 0.528986 | 0.635961 |
| EFHD1                 | 2q37.1   | -0.047335384 | 0.529205 | 0.636185 |
| FZD7                  | 2q33.1   | -0.047320737 | 0.529332 | 0.6363   |
| ITGAV                 | 2q32.1   | -0.047295629 | 0.529551 | 0.636502 |
| NRN1L                 | 16q22.1  | 0.047294173  | 0.529564 | 0.636502 |
| VOPP1                 | 7p11.2   | -0.047280983 | 0.529679 | 0.636547 |

|           |           |              |          |          |
|-----------|-----------|--------------|----------|----------|
| HLA-DPB2  | 6p21. 32  | -0.047280802 | 0.52968  | 0.636547 |
| COL5A3    | 19p13. 2  | 0.04727889   | 0.529697 | 0.636547 |
| CCL24     | 7q11. 23  | 0.047242167  | 0.530017 | 0.636871 |
| ZDHHC2    | 8p22      | -0.047239135 | 0.530044 | 0.636871 |
| CYP4X1    | 1p33 1    | 0.047237043  | 0.530062 | 0.636871 |
| NRAP      | 10q25. 3  | -0.047224322 | 0.530173 | 0.636966 |
| HDDC2     | 6q22. 31  | -0.047220304 | 0.530208 | 0.63697  |
| LINC00452 | 13q34     | 0.047188836  | 0.530482 | 0.637261 |
| RAC3      | 17q25. 3  | 0.047159626  | 0.530737 | 0.637474 |
| SUGT1P3   | 13q14. 11 | -0.047159626 | 0.530737 | 0.637474 |
| PI15      | 8q21. 13  | -0.047153349 | 0.530792 | 0.637474 |
| GPATCH4   | 1q22-q23. | 0.047149164  | 0.530828 | 0.637474 |
| NSUN7     | 4p14      | -0.047144979 | 0.530865 | 0.637474 |
| CBLN3     | 14q12     | 0.047142887  | 0.530883 | 0.637474 |
| ERRFI1    | 1p36. 23  | 0.047142887  | 0.530883 | 0.637474 |
| BCAT1     | 12p12. 1  | -0.047134518 | 0.530956 | 0.637524 |
| C10RF52   | 1p22. 3   | 0.047119871  | 0.531084 | 0.637639 |
| SNORA71E  | 20q11. 23 | 0.047111526  | 0.531157 | 0.637688 |
| LCE2C     | 1q21. 3   | 0.047102793  | 0.531233 | 0.637741 |
| LOC145783 | 15q21. 3  | -0.047098948 | 0.531266 | 0.637743 |
| SPHAR     | 1q42. 13  | -0.047071747 | 0.531504 | 0.637957 |
| TMEM120B  | 12q24. 31 | -0.047069655 | 0.531522 | 0.637957 |
| SCARNA17  | 18q21. 1  | 0.047067611  | 0.53154  | 0.637957 |
| DR1       | 1p22. 1   | -0.047059193 | 0.531613 | 0.637974 |
| SPAM1     | 7q31. 32  | -0.047055091 | 0.531649 | 0.637974 |
| DNAJC19   | 3q26. 33  | 0.047055008  | 0.53165  | 0.637974 |
| LTBP3     | 11q13. 1  | -0.047044546 | 0.531741 | 0.638045 |
| CSAD      | 12q13. 13 | -0.047038269 | 0.531796 | 0.638072 |
| OCM2      | 7q21. 3   | -0.047012246 | 0.532023 | 0.638307 |
| C2ORF88   | 2q32. 2   | 0.047006884  | 0.53207  | 0.638325 |
| RPL10A    | 6p21. 31  | -0.04699433  | 0.53218  | 0.638418 |
| DUSP18    | 22q12. 2  | 0.046971314  | 0.532381 | 0.638621 |
| TERB1     | 16q22. 1  | 0.046955234  | 0.532522 | 0.638751 |
| OR2D2     | 11p15. 4  | -0.046914083 | 0.532881 | 0.63912  |
| HSPG2     | 1p36. 12  | 0.046912728  | 0.532893 | 0.63912  |
| C6ORF52   | 6p24. 2   | 0.046896038  | 0.533039 | 0.639257 |
| SGPL1     | 10q22. 1  | -0.04688762  | 0.533113 | 0.63929  |
| FOXP1     | 3p13      | -0.046885527 | 0.533131 | 0.63929  |
| TCTE1     | 6p21. 1   | -0.046843437 | 0.533499 | 0.63965  |
| POU3F4    | Xq21. 1   | -0.046840615 | 0.533524 | 0.63965  |
| C9ORF57   | 9q21. 13  | 0.046840243  | 0.533527 | 0.63965  |
| VCX3B     | Xp22. 31  | 0.046835587  | 0.533568 | 0.63966  |
| TAS2R9    | 12p13. 2  | -0.046820953 | 0.533696 | 0.639775 |
| KLHL3     | 5q31. 2   | -0.04680811  | 0.533808 | 0.639872 |
| FMO3      | 1q24. 3   | -0.046770448 | 0.534138 | 0.640228 |
| HSD17B3   | 9q22. 32  | -0.046756657 | 0.534258 | 0.640335 |
| C11ORF16  | 11p15. 4  | -0.046724648 | 0.534538 | 0.640596 |
| GREM1     | 15q13. 3  | -0.046724416 | 0.53454  | 0.640596 |
| MBD3L5    | 19p13. 2  | -0.046705341 | 0.534707 | 0.640758 |
| SEC24C    | 10q22. 2  | 0.046686753  | 0.53487  | 0.640914 |
| KRT38     | 17q21. 2  | -0.046667591 | 0.535038 | 0.641077 |
| QTRT1     | 19p13. 2  | 0.046651183  | 0.535182 | 0.641211 |
| TTF1      | 9q34. 13  | -0.046632352 | 0.535347 | 0.641354 |
| WDR93     | 15q26. 1  | -0.04663026  | 0.535365 | 0.641354 |

|          |           |              |          |          |
|----------|-----------|--------------|----------|----------|
| TMEM249  | 8q24.3    | 0.04656856   | 0.535906 | 0.641919 |
| VSIG8    | 1q23.2    | -0.046567157 | 0.535918 | 0.641919 |
| JKAMP    | 14q23.1   | -0.046565397 | 0.535934 | 0.641919 |
| MAD2L1BP | 6p21.1    | 0.046557027  | 0.536007 | 0.641969 |
| THOC1    | 18p11.32  | 0.046538196  | 0.536172 | 0.642128 |
| DGCR6L   | 22q11.21  | -0.046531919 | 0.536227 | 0.642155 |
| IL4      | 5q31.1    | -0.04652353  | 0.536301 | 0.642205 |
| WDR76    | 15q15.3   | 0.046490072  | 0.536594 | 0.642463 |
| ING4     | 12p13.31  | 0.046487979  | 0.536612 | 0.642463 |
| MANEAL   | 1p34.3    | -0.046487979 | 0.536612 | 0.642463 |
| PNPLA4   | Xp22.31   | -0.046481702 | 0.536668 | 0.64249  |
| UBA6-AS1 | 4q13.2    | 0.046477518  | 0.536704 | 0.642496 |
| SLC43A3  | 11q12.1   | -0.046469148 | 0.536778 | 0.642545 |
| NFKBIA   | 14q13.2   | -0.046458686 | 0.536869 | 0.642617 |
| TNPO3    | 7q32.1    | -0.046448225 | 0.536961 | 0.642688 |
| SYNDIG1  | 20p11.21  | -0.046429393 | 0.537127 | 0.642815 |
| NUDT19   | 19q13.11  | 0.046425209  | 0.537163 | 0.642815 |
| OR4N5    | 14q11.2   | 0.04641803   | 0.537226 | 0.642815 |
| SNAR-G1  | 19q13.33  | -0.046417778 | 0.537228 | 0.642815 |
| TRIM48   | 11q11     | 0.046417778  | 0.537228 | 0.642815 |
| HDLBP    | 2q37.3    | 0.046410562  | 0.537292 | 0.642853 |
| KRTAP5-2 | 11p15.5   | -0.04639509  | 0.537428 | 0.642977 |
| GMPPB    | 3p21.31   | 0.046370807  | 0.537641 | 0.643193 |
| TSIX     | Xq13.2    | 0.046319695  | 0.53809  | 0.643692 |
| TFDP3    | Xq26.2    | -0.046290722 | 0.538344 | 0.643958 |
| TMEM218  | 11q24.2   | -0.046220158 | 0.538964 | 0.644661 |
| NMNAT2   | 1q25.3    | -0.046209696 | 0.539056 | 0.644732 |
| DCUN1D5  | 11q22.3   | 0.046195049  | 0.539185 | 0.644848 |
| PAPSS1   | 4q25      | -0.046169941 | 0.539406 | 0.645073 |
| CES1P1   | 16q12.2   | -0.04615787  | 0.539512 | 0.645161 |
| SLC47A1  | 17p11.2   | 0.04611554   | 0.539884 | 0.645535 |
| KAZALD1  | 10q24.31  | 0.046113448  | 0.539903 | 0.645535 |
| MBLAC1   | 7q22.1    | -0.046111355 | 0.539921 | 0.645535 |
| CRYGB    | 2q33.3    | -0.046107272 | 0.539957 | 0.645539 |
| MT1IP    | 16q13     | -0.04610211  | 0.540003 | 0.645555 |
| NSUN3    | 3q11.2    | 0.046094616  | 0.540069 | 0.645595 |
| DYDC1    | 10q23.1   | -0.046089882 | 0.54011  | 0.645606 |
| PDE7A    | 8q13.1    | -0.046069508 | 0.54029  | 0.645754 |
| SNORA74A | 5q31.2    | -0.046063669 | 0.540341 | 0.645754 |
| CAVIN4   | 9q31.1    | 0.046062209  | 0.540354 | 0.645754 |
| FBXO2    | 1p36.22   | 0.046061139  | 0.540363 | 0.645754 |
| TUSC2    | 3p21.31   | 0.046031846  | 0.540621 | 0.646024 |
| RASL11B  | 4q12      | -0.046010922 | 0.540805 | 0.646205 |
| MED11    | 17p13.2   | -0.045994183 | 0.540953 | 0.646343 |
| RAP2C    | Xq26.2    | 0.045985814  | 0.541027 | 0.646392 |
| PAK2     | 3q29      | 0.045981629  | 0.541063 | 0.646398 |
| TCF20    | 22q13.2 2 | -0.045941874 | 0.541414 | 0.646777 |
| MZB1     | 5q31.2    | -0.045935597 | 0.541469 | 0.646805 |
| QPRT     | 16p11.2   | -0.045904212 | 0.541745 | 0.647097 |
| HYI      | 1p34.2    | -0.045887473 | 0.541893 | 0.647234 |
| ZNF503   | 10q22.2   | -0.045866549 | 0.542077 | 0.647399 |
| ARMC6    | 19p13.11  | -0.045864457 | 0.542096 | 0.647399 |
| ADK      | 10q22.2 1 | 0.045856088  | 0.54217  | 0.647449 |
| PRSS3    | 9p13.3    | 0.045849811  | 0.542225 | 0.647476 |

|            |          |              |          |          |
|------------|----------|--------------|----------|----------|
| HAND2      | 4q34.1   | -0.045845626 | 0.542262 | 0.647481 |
| KLC2       | 11q13.2  | 0.045833072  | 0.542373 | 0.647575 |
| PDCL3P4    | 3q12.3   | -0.045818425 | 0.542502 | 0.64769  |
| RGS13      | 1q31.2   | -0.045793557 | 0.542721 | 0.647914 |
| ALOX12     | 17p13.1  | -0.045772393 | 0.542908 | 0.648098 |
| INTS3      | 1q21.3   | -0.045761932 | 0.543    | 0.648169 |
| SPATA45    | 1q32.3   | -0.045757759 | 0.543037 | 0.648174 |
| FAIM       | 3q22.3   | 0.045753562  | 0.543074 | 0.64818  |
| FAS        | 10q23.31 | -0.045726362 | 0.543314 | 0.648369 |
| KIAA0930   | 22q13.31 | 0.045726362  | 0.543314 | 0.648369 |
| CEACAM22F  | 19q13.31 | 0.045724605  | 0.54333  | 0.648369 |
| ERH        | 14q24.1  | 0.045717992  | 0.543388 | 0.6484   |
| PDE6H      | 12p12.3  | -0.045706049 | 0.543493 | 0.648455 |
| PLXNA2     | 1q32.2   | 0.045705438  | 0.543499 | 0.648455 |
| BHLHE23    | 20q13.33 | 0.045642823  | 0.544052 | 0.649075 |
| PPRC1      | 10q24.32 | 0.045613374  | 0.544312 | 0.649347 |
| PRKY       | Yp11.2   | -0.045605537 | 0.544381 | 0.649391 |
| ZNF705D    | 8p23.1   | 0.045561698  | 0.544768 | 0.649814 |
| RGPD8      | 2q14.1   | -0.045557271 | 0.544808 | 0.649822 |
| PIP5K1A    | 1q21.3   | -0.045542234 | 0.54494  | 0.649865 |
| COMMD9     | 11p13    | -0.045540142 | 0.544959 | 0.649865 |
| VCX3A      | Xp22.31  | 0.045538606  | 0.544973 | 0.649865 |
| OR1L6      | 9q33.2   | -0.045538456 | 0.544974 | 0.649865 |
| LINC00159  | 21q22.11 | 0.045494016  | 0.545367 | 0.650295 |
| TARBP2     | 12q13.13 | 0.045452263  | 0.545736 | 0.650674 |
| GCM1       | 6p12.1   | 0.045449719  | 0.545759 | 0.650674 |
| ANKUB1     | 3q25.1   | 0.045447004  | 0.545783 | 0.650674 |
| GTF2H2C    | 5q13.2   | -0.045425062 | 0.545977 | 0.650867 |
| LNX2       | 13q12.2  | -0.0454146   | 0.546069 | 0.650934 |
| CASP1      | 11q22.3  | 0.045406231  | 0.546143 | 0.650934 |
| PTGER2     | 14q22.1  | -0.045406231 | 0.546143 | 0.650934 |
| MYO18B     | 22q12.1  | -0.045403948 | 0.546163 | 0.650934 |
| CALR3      | 19p13.11 | -0.045392234 | 0.546267 | 0.651019 |
| SIRPD      | 20p13    | -0.045362727 | 0.546528 | 0.651291 |
| PWP1       | 12q23.3  | -0.045349737 | 0.546643 | 0.651364 |
| CEACAM7    | 19q13.2  | 0.045348475  | 0.546654 | 0.651364 |
| GSTA2      | 6p12.2   | -0.045324528 | 0.546866 | 0.651578 |
| FTCD       | 21q22.3  | -0.04531968  | 0.546909 | 0.65159  |
| ACBD5      | 10p12.1  | 0.045312075  | 0.546977 | 0.651632 |
| WDR11      | 10q26.12 | -0.045297428 | 0.547106 | 0.651733 |
| LOC100134  | 20p11.1  | -0.045295061 | 0.547127 | 0.651733 |
| ARHGDIB    | 12p12.3  | 0.045232565  | 0.547681 | 0.652354 |
| VENTXP7    | 3p24.3   | 0.045226429  | 0.547735 | 0.65238  |
| GPR21      | 9q33.2   | 0.045203985  | 0.547934 | 0.652569 |
| LRRC8B     | 1p22.2   | -0.04520118  | 0.547959 | 0.652569 |
| SLC30A1    | 1q32.3   | -0.045196995 | 0.547996 | 0.652574 |
| FAM41C     | 1p36.33  | -0.045169795 | 0.548237 | 0.652822 |
| ANP32AP1   | 15q14    | 0.045113301  | 0.548738 | 0.653353 |
| RLBP1      | 15q26.1  | -0.04511212  | 0.548749 | 0.653353 |
| CIB3       | 19p13.11 | 0.045072531  | 0.5491   | 0.653733 |
| INTS1      | 7p22.3   | 0.045060992  | 0.549202 | 0.653804 |
| PDIA6      | 2p25.1   | -0.045054715 | 0.549258 | 0.653804 |
| RAB3GAP1   | 2q21.3   | -0.045054715 | 0.549258 | 0.653804 |
| RASAL2-AS1 | 1q25.2   | -0.045044253 | 0.549351 | 0.653875 |

|           |                |               |           |           |
|-----------|----------------|---------------|-----------|-----------|
| ZNF577    | 19q13. 41      | -0. 045035884 | 0. 549425 | 0. 653925 |
| SLC22A15  | 1p13. 1        | 0. 045012868  | 0. 549629 | 0. 654112 |
| ZDHC1     | 16q22. 1       | -0. 045010776 | 0. 549648 | 0. 654112 |
| LINC00928 | 15q26. 1       | -0. 044980954 | 0. 549913 | 0. 654385 |
| SNORA20   | 6q25. 3        | -0. 044977576 | 0. 549943 | 0. 654385 |
| DUSP12    | 1q23. 3        | 0. 044973113  | 0. 549982 | 0. 654393 |
| STRADA    | 17q23. 3       | -0. 044968929 | 0. 55002  | 0. 654399 |
| MS4A6E    | 11q12. 2       | -0. 044958669 | 0. 550111 | 0. 65443  |
| ZMAT5     | 22q12. 2       | 0. 044956374  | 0. 550131 | 0. 65443  |
| TRHDE-AS1 | 12q21. 1       | 0. 044954898  | 0. 550144 | 0. 65443  |
| LARP6     | 15q23          | -0. 044931266 | 0. 550354 | 0. 654641 |
| DACT3     | 19q13. 32      | 0. 044899881  | 0. 550633 | 0. 654933 |
| DSC1      | 18q12. 1       | -0. 044889172 | 0. 550728 | 0. 654988 |
| LINS1     | 15q26. 3       | -0. 044887327 | 0. 550744 | 0. 654988 |
| SMARCB1   | 22q11. 23      | -0. 044878957 | 0. 550819 | 0. 655037 |
| GIGYF1    | 7q22. 1        | -0. 044866403 | 0. 55093  | 0. 655131 |
| VHLL      | 1q22           | -0. 04486098  | 0. 550979 | 0. 655142 |
| ANAPC15   | 11q13. 4       | 0. 044858034  | 0. 551005 | 0. 655142 |
| DYNC2LI1  | 2p21           | -0. 044841295 | 0. 551153 | 0. 655256 |
| PLB1      | 2p23. 2        | 0. 044835041  | 0. 551209 | 0. 655256 |
| LNPB      | 2q31. 1        | -0. 044835018 | 0. 551209 | 0. 655256 |
| CHAT      | 10q11. 23      | -0. 044829664 | 0. 551257 | 0. 655256 |
| AP3D1     | 19p13. 3       | 0. 044828741  | 0. 551265 | 0. 655256 |
| MRPL1     | 4q21. 1        | -0. 044791078 | 0. 5516   | 0. 655615 |
| CSRP3     | 11p15. 1       | -0. 044740216 | 0. 552052 | 0. 656112 |
| ZGLP1     | 19p13. 2       | 0. 044736677  | 0. 552084 | 0. 656112 |
| OTX2      | 14q22. 3       | -0. 044732473 | 0. 552121 | 0. 656118 |
| BPIFC     | 22q12. 3       | -0. 044710867 | 0. 552313 | 0. 656307 |
| HIGD2B    | 15q24. 1       | 0. 044700254  | 0. 552408 | 0. 65638  |
| TRIM50    | 7q11. 23       | -0. 04469544  | 0. 552451 | 0. 656392 |
| REG3G     | 2p12           | -0. 044661181 | 0. 552756 | 0. 656702 |
| MUSTN1    | 3p21. 1        | -0. 044655075 | 0. 55281  | 0. 656702 |
| SSC4D     | 7q11. 23       | 0. 044655075  | 0. 55281  | 0. 656702 |
| ATP5PF    | 21q21. 3       | 0. 044644613  | 0. 552903 | 0. 656774 |
| SCARB1    | 12q24. 31      | 0. 044636244  | 0. 552978 | 0. 656823 |
| ACTA1     | 1q42. 13       | -0. 044628789 | 0. 553044 | 0. 656863 |
| MESP2     | 15q26. 1       | 0. 04462369   | 0. 553089 | 0. 656878 |
| ACCSL     | 11p11. 2       | -0. 044591686 | 0. 553374 | 0. 657158 |
| DUSP21    | Xp11. 3        | -0. 044589833 | 0. 553391 | 0. 657158 |
| SZT2      | 1p34. 2        | -0. 044581843 | 0. 553462 | 0. 657203 |
| GDI1      | Xq28           | 0. 044563011  | 0. 55363  | 0. 657363 |
| LILRB3    | 19q13. 42      | -0. 044542088 | 0. 553816 | 0. 657546 |
| OR10G7    | 11q24. 2       | -0. 044509387 | 0. 554107 | 0. 657822 |
| LRIG3     | 12q14. 1       | 0. 04450861   | 0. 554114 | 0. 657822 |
| ZSCAN21   | 7q22. 1        | -0. 044479317 | 0. 554375 | 0. 658092 |
| NPS       | 10q26. 2       | -0. 044453525 | 0. 554605 | 0. 658285 |
| RPL35A    | 3q29           | 0. 044452116  | 0. 554618 | 0. 658285 |
| AGBL5     | 2p23. 3        | 0. 044450024  | 0. 554637 | 0. 658285 |
| TSPAN16   | 19p13. 2       | 0. 044427207  | 0. 55484  | 0. 658488 |
| KIR3DX1   | 19q13. 42      | -0. 044409607 | 0. 554997 | 0. 658614 |
| RNU11     | 1p35. 3        | 0. 044407898  | 0. 555012 | 0. 658614 |
| GULP1     | 2q32. 1-q32. 2 | 0. 04436633   | 0. 555383 | 0. 658998 |
| MLF2      | 12p13. 31      | 0. 044364237  | 0. 555402 | 0. 658998 |
| RABGAP1L  | 1q25. 1        | -0. 044353776 | 0. 555495 | 0. 659069 |



|            |           |               |           |           |
|------------|-----------|---------------|-----------|-----------|
| ADAM18     | 8p11. 22  | 0. 044339178  | 0. 555625 | 0. 659129 |
| DYDC2      | 10q23. 1  | 0. 044337939  | 0. 555636 | 0. 659129 |
| MCOLN2     | 1p22. 3   | -0. 044337037 | 0. 555644 | 0. 659129 |
| SCLY       | 2q37. 3   | -0. 044328667 | 0. 555719 | 0. 659179 |
| AIRE       | 21q22. 3  | 0. 044304562  | 0. 555934 | 0. 659395 |
| LSP1P5     | 1q21. 1   | 0. 044293097  | 0. 556037 | 0. 659421 |
| OR51S1     | 11p15. 4  | -0. 0442925   | 0. 556042 | 0. 659421 |
| MRE11      | 11q21     | -0. 044291005 | 0. 556055 | 0. 659421 |
| LOC148696  | 1q32. 2   | -0. 044274325 | 0. 556204 | 0. 659558 |
| EIF4A1     | 17p13. 1  | -0. 044253343 | 0. 556392 | 0. 659741 |
| METTL27    | 7q11. 23  | -0. 044249158 | 0. 556429 | 0. 659746 |
| PITX2      | 4q25      | 0. 044227047  | 0. 556626 | 0. 659941 |
| OR2S2      | 9p13. 3   | 0. 044210991  | 0. 55677  | 0. 660072 |
| SERTAD4    | 1q32. 2   | 0. 044188479  | 0. 556971 | 0. 660271 |
| ABCF1      | 6p21. 33  | 0. 044178018  | 0. 557064 | 0. 660343 |
| WFDC8      | 20q13. 12 | 0. 044164388  | 0. 557186 | 0. 660448 |
| PAXIP1-AS1 | 7q36. 2   | 0. 044159186  | 0. 557233 | 0. 660464 |
| CDKL1      | 14q21. 3  | -0. 044155002 | 0. 55727  | 0. 660469 |
| MYO18A     | 17q11. 2  | 0. 044131986  | 0. 557476 | 0. 660674 |
| PAGE5      | Xp11. 21  | -0. 044121551 | 0. 557569 | 0. 660689 |
| OR10AD1    | 12q13. 11 | -0. 04412129  | 0. 557571 | 0. 660689 |
| MAOB       | Xp11. 3   | 0. 044119432  | 0. 557588 | 0. 660689 |
| FAM225A    | 9q32      | -0. 044092231 | 0. 557831 | 0. 660921 |
| MED17      | 11q21     | -0. 044090139 | 0. 55785  | 0. 660921 |
| FAM49B     | 8q24. 21  | 0. 044062938  | 0. 558093 | 0. 66117  |
| OR56B4     | 11p15. 4  | 0. 044050608  | 0. 558203 | 0. 661262 |
| RGL2       | 6p21. 32  | 0. 044044107  | 0. 558261 | 0. 661291 |
| BEST3      | 12q15     | 0. 044037897  | 0. 558317 | 0. 661318 |
| AFAP1      | 4p16. 1   | 0. 044023183  | 0. 558449 | 0. 661435 |
| OSBPL1A    | 18q11. 2  | -0. 044018999 | 0. 558486 | 0. 66144  |
| SLC10A1    | 14q24. 1  | 0. 04398542   | 0. 558786 | 0. 661756 |
| AQP12A     | 2q37. 3   | -0. 043978645 | 0. 558847 | 0. 661789 |
| COL12A1    | 6q13-q14. | 0. 043952043  | 0. 559085 | 0. 662032 |
| FOXJ1      | 17q25. 1  | 0. 043933212  | 0. 559254 | 0. 662141 |
| NYAP1      | 7q22. 1   | -0. 043933212 | 0. 559254 | 0. 662141 |
| LAT        | 16p11. 2  | -0. 043926935 | 0. 55931  | 0. 662141 |
| CDRT15     | 17p12     | 0. 043926932  | 0. 55931  | 0. 662141 |
| HOXD12     | 2q31. 1   | 0. 043897094  | 0. 559577 | 0. 662418 |
| TP53BP2    | 1q41      | 0. 043880903  | 0. 559722 | 0. 66255  |
| APOA1      | 11q23. 3  | 0. 043866715  | 0. 559849 | 0. 662662 |
| ANKRD28    | 3p25. 1   | -0. 043862072 | 0. 559891 | 0. 662672 |
| GPAT4      | 8p11. 21  | -0. 043857887 | 0. 559928 | 0. 662677 |
| SNORA63    | 3q27. 3   | -0. 043846471 | 0. 56003  | 0. 662758 |
| PSMF1      | 20p13     | 0. 043839056  | 0. 560097 | 0. 662798 |
| ISG20L2    | 1q23. 1   | -0. 043826502 | 0. 560209 | 0. 662892 |
| BCKDHA     | 19q13. 2  | -0. 043811855 | 0. 56034  | 0. 662987 |
| COLCA2     | 11q23. 1  | 0. 043809763  | 0. 560359 | 0. 662987 |
| CATSPERZ   | 11q13. 1  | 0. 043806424  | 0. 560389 | 0. 662987 |
| SPATA31A   | 5q12      | 0. 043789618  | 0. 56054  | 0. 663099 |
| PCAT4      | 4q21. 21  | 0. 043788466  | 0. 56055  | 0. 663099 |
| PRAMEF18   | 1p36. 21  | 0. 043774765  | 0. 560673 | 0. 663205 |
| TSN        | 2q14. 3   | 0. 043761639  | 0. 56079  | 0. 663305 |
| OR52B6     | 11p15. 4  | 0. 043745421  | 0. 560936 | 0. 663437 |
| PLD3       | 19q13. 2  | -0. 043698868 | 0. 561353 | 0. 663892 |

|                    |              |          |          |
|--------------------|--------------|----------|----------|
| LINC010037q36.1    | -0.04366539  | 0.561654 | 0.664207 |
| UMODL1 21q22.3     | -0.043654624 | 0.56175  | 0.664282 |
| TFAMP1 7p22.3      | 0.043642202  | 0.561862 | 0.664375 |
| IL17REL 22q13.33   | -0.043628001 | 0.561989 | 0.664486 |
| TIMM9 14q23.1      | -0.04360262  | 0.562217 | 0.664606 |
| ZNF23 16q22.2      | -0.043596343 | 0.562273 | 0.664606 |
| EEF1AKMT3 12q14.1  | 0.04359425   | 0.562292 | 0.664606 |
| TAF3 1p13.2        | 0.043581531  | 0.562406 | 0.664606 |
| CLN5 13q22.3       | -0.043552403 | 0.562667 | 0.664606 |
| PIK3CD-AS1 1p36.22 | -0.043550441 | 0.562685 | 0.664606 |
| GOLGA6L6 15q11.2   | 0.043547074  | 0.562715 | 0.664606 |
| NOC2LP2 2q21.1     | 0.043533572  | 0.562837 | 0.664606 |
| ASB13 10p15.1      | 0.04353148   | 0.562855 | 0.664606 |
| OR2A1 7q35         | -0.043530912 | 0.56286  | 0.664606 |
| LTC4S 5q35.3       | 0.043525202  | 0.562912 | 0.664606 |
| HYKK 15q25.1       | 0.043521018  | 0.562949 | 0.664606 |
| TRAF3IP1 2q37.3    | 0.043518925  | 0.562968 | 0.664606 |
| CDX4 Xq13.2        | 0.043516667  | 0.562988 | 0.664606 |
| KIF2B 17q22        | 0.043516667  | 0.562988 | 0.664606 |
| KRTAP9-8 17q21.2   | 0.043516667  | 0.562988 | 0.664606 |
| OR10A7 12q13.2     | 0.043516667  | 0.562988 | 0.664606 |
| OR14J1 6p22.1      | 0.043516667  | 0.562988 | 0.664606 |
| OR1I1 19p13.12     | 0.043516667  | 0.562988 | 0.664606 |
| OR2M2 1q44         | 0.043516667  | 0.562988 | 0.664606 |
| OR2M5 1q44         | 0.043516667  | 0.562988 | 0.664606 |
| OR2M7 1q44         | 0.043516667  | 0.562988 | 0.664606 |
| OR4B1 11p11.2      | 0.043516667  | 0.562988 | 0.664606 |
| OR4M1 14q11.2      | 0.043516667  | 0.562988 | 0.664606 |
| OR8B3 11q24.2      | 0.043516667  | 0.562988 | 0.664606 |
| TAAR2 6q23.2       | 0.043516667  | 0.562988 | 0.664606 |
| TAS2R16 7q31.32 7  | 0.043516667  | 0.562988 | 0.664606 |
| UTP25 1q32.2       | 0.043502187  | 0.563118 | 0.66472  |
| IQCK 16p12.3       | 0.043498002  | 0.563156 | 0.664726 |
| AMY2B 1p21.1       | -0.043489632 | 0.563231 | 0.664775 |
| LOC10012819p13.2   | -0.043461694 | 0.563482 | 0.665032 |
| LOC10013020p11.23  | 0.043434559  | 0.563726 | 0.66528  |
| PER4 7p21.3        | 0.043418766  | 0.563868 | 0.665409 |
| CCL22 16q21        | 0.043403846  | 0.564002 | 0.665528 |
| KCNJ9 1q23.2       | 0.043385354  | 0.564168 | 0.665684 |
| SLC5A1 22q12.3     | 0.043371437  | 0.564293 | 0.665793 |
| LRRC24 8q24.3      | -0.043365361 | 0.564348 | 0.665818 |
| ZNF282 7q36.1      | 0.043357814  | 0.564416 | 0.66584  |
| HPSE2 10q24.2      | -0.043355885 | 0.564433 | 0.66584  |
| WDR44 Xq24         | -0.043343167 | 0.564547 | 0.665935 |
| GMPR 6p22.3        | -0.043303413 | 0.564905 | 0.666318 |
| LCE2A 1q21.3       | -0.043277415 | 0.565139 | 0.666554 |
| TTC32 2p24.1       | -0.04326575  | 0.565244 | 0.666639 |
| AK7 14q32.2        | -0.043261566 | 0.565281 | 0.666644 |
| PRPF38A 1p32.3     | 0.043246919  | 0.565413 | 0.66676  |
| PLPBP 8p11.23      | -0.043221811 | 0.565639 | 0.666987 |
| SND1-IT1 7q32.1    | 0.043216867  | 0.565684 | 0.667    |
| PC 11q13.2         | 0.043205072  | 0.56579  | 0.667086 |
| SMARCC1 3p21.31    | -0.043198795 | 0.565846 | 0.667113 |
| CPSF4 7q22.1       | 0.043188333  | 0.56594  | 0.667185 |

|           |          |              |          |          |
|-----------|----------|--------------|----------|----------|
| ABCG4     | 11q23.3  | -0.043167409 | 0.566129 | 0.667328 |
| CNTNAP3   | 9p12     | -0.043167409 | 0.566129 | 0.667328 |
| IMMT      | 2p11.2 2 | -0.043146486 | 0.566317 | 0.667511 |
| MYB       | 6q23.3   | 0.043138116  | 0.566393 | 0.667543 |
| HAGH      | 16p13.3  | -0.043136024 | 0.566411 | 0.667543 |
| GNRHR     | 4q13.2   | -0.043122652 | 0.566532 | 0.667646 |
| ZNF112    | 19q13.31 | -0.043106731 | 0.566675 | 0.667775 |
| NR2F1     | 5q15     | -0.043096269 | 0.56677  | 0.667808 |
| SLC25A28  | 10q24.2  | 0.043096269  | 0.56677  | 0.667808 |
| PMS2CL    | 7p22.1   | -0.043062792 | 0.567071 | 0.668084 |
| VAPA      | 18p11.22 | 0.043062792  | 0.567071 | 0.668084 |
| C5ORF58   | 5q35.1   | -0.043012159 | 0.567528 | 0.668561 |
| CREBZF    | 11q14.1  | 0.043010483  | 0.567543 | 0.668561 |
| MXI1      | 10q25.2  | -0.042993744 | 0.567694 | 0.668699 |
| LINC01553 | 10q21.2  | 0.042981485  | 0.567804 | 0.668754 |
| PXDN      | 2p25.3   | -0.04298119  | 0.567807 | 0.668754 |
| C8A       | 1p32.2   | -0.042972506 | 0.567885 | 0.668782 |
| PPP1R14C  | 6q25.1   | 0.042970728  | 0.567901 | 0.668782 |
| EGF       | 4q25     | 0.042967385  | 0.567931 | 0.668782 |
| IGF2      | 11p15.5  | 0.042956081  | 0.568033 | 0.668863 |
| GPR27     | 3p13     | -0.042937853 | 0.568198 | 0.669017 |
| ZNF251    | 8q24.3   | 0.042903773  | 0.568505 | 0.669326 |
| DEFB125   | 20p13    | -0.042901338 | 0.568527 | 0.669326 |
| KIR2DL3   | 19q13.42 | 0.042844186  | 0.569043 | 0.669894 |
| BRF2      | 8p11.23  | -0.04283054  | 0.569166 | 0.66996  |
| TOPBP1    | 3q22.1   | -0.04283054  | 0.569166 | 0.66996  |
| NUTM2G    | 9q22.33  | 0.042790808  | 0.569525 | 0.670303 |
| BEGAIN    | 14q32.2  | -0.042790785 | 0.569525 | 0.670303 |
| DRC1      | 2p23.3   | -0.042781516 | 0.569609 | 0.670362 |
| PPARGC1B  | 5q32     | -0.042767769 | 0.569733 | 0.670469 |
| OR2A25    | 7q35     | -0.042763678 | 0.56977  | 0.670473 |
| YIPF5     | 5q31.3   | -0.042719667 | 0.570167 | 0.670824 |
| HIBADH    | 7p15.2   | -0.042719645 | 0.570167 | 0.670824 |
| BYSL      | 6p21.1   | -0.042717553 | 0.570186 | 0.670824 |
| LINC00596 | 14q11.2  | -0.042715768 | 0.570202 | 0.670824 |
| CHST1     | 11p11.2  | 0.042711276  | 0.570243 | 0.670833 |
| FAM138D   | 12p13.33 | -0.042660875 | 0.570698 | 0.671321 |
| CPNE2     | 16q13    | -0.042656874 | 0.570735 | 0.671321 |
| BCL2A1    | 15q25.1  | 0.04265269   | 0.570772 | 0.671321 |
| SCARNA3   | 1q25.1   | -0.042650468 | 0.570792 | 0.671321 |
| FUCA2     | 6q24.2   | -0.042633859 | 0.570943 | 0.671458 |
| SMG1P3    | 16p12.2  | -0.042604566 | 0.571207 | 0.67173  |
| DSCR9     | 21q22.13 | -0.042594821 | 0.571296 | 0.671794 |
| SNX5      | 20p11.23 | 0.042577365  | 0.571453 | 0.67194  |
| AGO2      | 8q24.3   | 0.042571088  | 0.57151  | 0.671948 |
| PCYT1A    | 3q29     | -0.042568995 | 0.571529 | 0.671948 |
| KRTAP4-9  | 17q21.2  | -0.042565503 | 0.571561 | 0.671948 |
| P2RX3     | 11q12.1  | -0.042545644 | 0.57174  | 0.672119 |
| DYNC2H1   | 11q22.3  | -0.042529241 | 0.571889 | 0.672254 |
| POLR2C    | 16q21    | -0.042504132 | 0.572116 | 0.672482 |
| ARHGAP6   | Xp22.2   | -0.04246647  | 0.572457 | 0.672843 |
| ADH7      | 4q23     | 0.042450168  | 0.572604 | 0.672963 |
| ABCA4     | 1p22.1   | 0.042447728  | 0.572626 | 0.672963 |
| MRPS18C   | 4q21.23  | -0.042424623 | 0.572836 | 0.673169 |

|           |          |              |          |          |
|-----------|----------|--------------|----------|----------|
| OVCH2     | 11p15.4  | 0.042393788  | 0.573115 | 0.673458 |
| RACK1     | 5q35.3   | 0.042382776  | 0.573215 | 0.673536 |
| ATP6V1G3  | 1q31.3   | 0.042364041  | 0.573384 | 0.673695 |
| FGF18     | 5q35.1   | 0.042347206  | 0.573537 | 0.673835 |
| PMCH      | 12q23.2  | -0.042339524 | 0.573606 | 0.673877 |
| OR2D3     | 11p15.4  | 0.042335803  | 0.57364  | 0.673877 |
| RXFP2     | 13q13.1  | 0.042323122  | 0.573755 | 0.673944 |
| HS3ST2    | 16p12.2  | 0.042322097  | 0.573764 | 0.673944 |
| PFDN5     | 12q13.13 | -0.04231582  | 0.573821 | 0.673971 |
| FAM50B    | 6p25.2   | -0.042301174 | 0.573954 | 0.674087 |
| TDRD3     | 13q21.2  | -0.042273973 | 0.5742   | 0.674314 |
| CCDC54    | 3q13.12  | 0.042272451  | 0.574214 | 0.674314 |
| ZNF683    | 1p36.11  | 0.042254118  | 0.57438  | 0.674441 |
| LTBP1     | 2p22.3   | -0.04225305  | 0.57439  | 0.674441 |
| ITPRIP    | 10q25.1  | -0.042236311 | 0.574542 | 0.674562 |
| MOB3B     | 9p21.2   | -0.042234218 | 0.574561 | 0.674562 |
| NPRL3     | 16p13.3  | 0.04220911   | 0.574789 | 0.67479  |
| AMMECR1L  | 2q14.3   | 0.042186094  | 0.574997 | 0.674995 |
| GSX2      | 4q12     | 0.042151048  | 0.575315 | 0.675329 |
| HS3ST3A1  | 17p12    | 0.04213797   | 0.575434 | 0.675406 |
| C11ORF87  | 11q22.3  | -0.042136379 | 0.575448 | 0.675406 |
| GOLGA2    | 9q34.11  | -0.042121231 | 0.575586 | 0.675527 |
| OR7C1     | 19p13.12 | 0.042113302  | 0.575658 | 0.675572 |
| CALN1     | 7q11.22  | -0.042102048 | 0.57576  | 0.675631 |
| STAM      | 10p12.33 | -0.042100308 | 0.575776 | 0.675631 |
| DEFB128   | 20p13    | -0.042066111 | 0.576086 | 0.675956 |
| STARD4    | 5q22.1   | -0.042052183 | 0.576212 | 0.676065 |
| GOLGA6C   | 15q24.2  | 0.042034846  | 0.57637  | 0.67621  |
| CCT8L2    | 22q11.1  | 0.042026138  | 0.576449 | 0.676263 |
| PCIF1     | 20q13.12 | 0.041999874  | 0.576688 | 0.676503 |
| SPDYE3    | 7q22.1   | 0.041991505  | 0.576764 | 0.676552 |
| MYLK3     | 16q11.2  | -0.041976859 | 0.576897 | 0.676669 |
| WDR43     | 2p23.2   | -0.041949658 | 0.577144 | 0.6769   |
| GREM2     | 1q43     | -0.041947653 | 0.577162 | 0.6769   |
| PCNX2     | 1q42.2   | -0.041914088 | 0.577467 | 0.677218 |
| CCDC154   | 16p13.3  | 0.041901621  | 0.57758  | 0.677311 |
| METRNL    | 16p13.3  | 0.041895257  | 0.577638 | 0.677322 |
| ANKRD40   | 17q21.33 | -0.041893164 | 0.577657 | 0.677322 |
| SCP2      | 1p32.3   | 0.04188061   | 0.577771 | 0.677416 |
| PNN       | 14q21.1  | 0.041855502  | 0.578    | 0.677613 |
| LOC148709 | 1q32.1   | 0.041854675  | 0.578007 | 0.677613 |
| FAM162B   | 6q22.1   | -0.041805285 | 0.578456 | 0.6781   |
| PARP8     | 5q11.1   | 0.041792731  | 0.57857  | 0.678194 |
| RPEL1     | 10q24.33 | 0.041736238  | 0.579084 | 0.678757 |
| CYP11A1   | 15q24.1  | -0.04173214  | 0.579122 | 0.678761 |
| OR4C6     | 11q11    | 0.041725878  | 0.579179 | 0.678788 |
| ACTL7A    | 9q31.3   | -0.041719865 | 0.579233 | 0.678812 |
| LOC153684 | 5p12     | -0.041711129 | 0.579313 | 0.678826 |
| KRT71     | 12q13.13 | 0.041711094  | 0.579313 | 0.678826 |
| LAYN      | 11q23.1  | 0.041706945  | 0.579351 | 0.67883  |
| OR10S1    | 11q24.1  | 0.04169463   | 0.579463 | 0.678888 |
| KBTBD2    | 7p14.3   | -0.041692298 | 0.579484 | 0.678888 |
| MROH5     | 8q24.3   | -0.041690375 | 0.579502 | 0.678888 |
| C10RF146  | 1p22.1   | -0.041667243 | 0.579712 | 0.679095 |

|            |            |               |           |           |
|------------|------------|---------------|-----------|-----------|
| SEC61G     | 7p11. 2    | 0. 041648359  | 0. 579884 | 0. 679256 |
| TLL10      | 1p36. 33   | 0. 041622226  | 0. 580122 | 0. 679495 |
| TMEM35A    | Xq22. 1    | -0. 041616973 | 0. 58017  | 0. 679511 |
| SPRED1     | 15q14      | -0. 041610696 | 0. 580227 | 0. 679539 |
| AGFG2      | 7q22. 1    | 0. 041593957  | 0. 58038  | 0. 679677 |
| PRKAA1     | 5p13. 1    | 0. 041581403  | 0. 580494 | 0. 679771 |
| SPACA3     | 17q11. 2   | 0. 041547592  | 0. 580802 | 0. 680092 |
| CWC25      | 17q12      | -0. 041543741 | 0. 580837 | 0. 680094 |
| ADAM6      | 14q32. 33  | -0. 041531187 | 0. 580952 | 0. 680188 |
| MRPL20     | 1p36. 33   | 0. 041510263  | 0. 581143 | 0. 680335 |
| CT55       | Xq26. 3    | -0. 041508147 | 0. 581162 | 0. 680335 |
| USP50      | 15q21. 2   | 0. 041506147  | 0. 58118  | 0. 680335 |
| LOC407835  | 7q32. 1    | 0. 041501894  | 0. 581219 | 0. 680341 |
| VN1R1      | 19q13. 43  | 0. 041483062  | 0. 581391 | 0. 680502 |
| SCUBE2     | 11p15. 4   | -0. 041474693 | 0. 581467 | 0. 680551 |
| KANSL1L    | 2q34       | 0. 041399368  | 0. 582154 | 0. 681316 |
| NEBL       | 10p12. 31  | 0. 041321951  | 0. 58286  | 0. 68209  |
| LHFPL3-AS1 | 7q22. 2-q2 | 0. 041316443  | 0. 582911 | 0. 68209  |
| DLG5-AS1   | 10q22. 3   | -0. 041315674 | 0. 582918 | 0. 68209  |
| SLITRK3    | 3q26. 1    | -0. 041286597 | 0. 583183 | 0. 68236  |
| APOL3      | 22q12. 3   | -0. 041252903 | 0. 583491 | 0. 68265  |
| XKRY2      | Yq11. 222  | 0. 041251988  | 0. 583499 | 0. 68265  |
| GNPNAT1    | 14q22. 1   | 0. 041217333  | 0. 583816 | 0. 682981 |
| DPPA2      | 3q13. 13   | 0. 041210008  | 0. 583883 | 0. 683019 |
| LRP1       | 12q13. 3   | -0. 041202687 | 0. 583949 | 0. 683057 |
| CTSW       | 11q13. 1   | -0. 04119641  | 0. 584007 | 0. 683084 |
| IL2RA      | 10p15. 1   | -0. 041158747 | 0. 584351 | 0. 683447 |
| SCAP       | 3p21. 31   | -0. 041142008 | 0. 584504 | 0. 683586 |
| HSPB3      | 5q11. 2    | -0. 041134302 | 0. 584574 | 0. 683617 |
| DIDO1      | 20q13. 33  | -0. 041131546 | 0. 584599 | 0. 683617 |
| C2         | 6p21. 33   | -0. 041093884 | 0. 584944 | 0. 68398  |
| COLCA1     | 11q23. 1   | 0. 041087607  | 0. 585001 | 0. 684007 |
| RNF17      | 13q12. 12  | -0. 041068712 | 0. 585174 | 0. 684169 |
| ITGB2      | 21q22. 3   | 0. 041054129  | 0. 585307 | 0. 684285 |
| CLCNKB     | 1p36. 13   | -0. 041045465 | 0. 585387 | 0. 684338 |
| TAF12      | 1p35. 3    | 0. 041041575  | 0. 585422 | 0. 684339 |
| SSX2       | Xp11. 22   | -0. 041011542 | 0. 585697 | 0. 68462  |
| VANGL2     | 1q23. 2    | 0. 040991359  | 0. 585882 | 0. 684796 |
| DDX4       | 5q11. 2    | 0. 040983078  | 0. 585957 | 0. 684845 |
| PCID2      | 13q34      | 0. 04097462   | 0. 586035 | 0. 684877 |
| RPS9       | 19q13. 42  | 0. 040972527  | 0. 586054 | 0. 684877 |
| SPRR2F     | 1q21. 3    | 0. 040964404  | 0. 586128 | 0. 684924 |
| RABL6      | 9q34. 3    | 0. 040955789  | 0. 586207 | 0. 684976 |
| UFD1       | 22q11. 21  | 0. 040945327  | 0. 586303 | 0. 685048 |
| ZNF212     | 7q36. 1    | -0. 040926496 | 0. 586475 | 0. 685209 |
| CROCCP3    | 1p36. 13   | -0. 040918126 | 0. 586552 | 0. 685259 |
| ZNF436-AS1 | 1p36. 12   | -0. 040909757 | 0. 586628 | 0. 685291 |
| ASCC1      | 10q22. 1   | 0. 040907664  | 0. 586648 | 0. 685291 |
| DGKG       | 3q27. 2-q2 | -0. 040890925 | 0. 586801 | 0. 68543  |
| DAZAP2     | 12q13. 13  | -0. 040876279 | 0. 586935 | 0. 685546 |
| POLD3      | 11q13. 4   | 0. 040828155  | 0. 587376 | 0. 686021 |
| SNHG28     | 1q23. 2    | -0. 040780031 | 0. 587817 | 0. 686496 |
| PEX19      | 1q23. 2    | -0. 040754922 | 0. 588047 | 0. 686691 |
| DIABLO     | 12q24. 31  | 0. 04075283   | 0. 588066 | 0. 686691 |

|                   |           |               |           |           |
|-------------------|-----------|---------------|-----------|-----------|
| RTL1              | 14q32. 2  | -0. 040750538 | 0. 588087 | 0. 686691 |
| LYZL6             | 17q12     | 0. 040731526  | 0. 588261 | 0. 686854 |
| APOD              | 3q29      | 0. 040723537  | 0. 588334 | 0. 6869   |
| LOC1002729q34. 11 |           | -0. 040710983 | 0. 588449 | 0. 686994 |
| CD74              | 5q33. 1   | -0. 040685875 | 0. 58868  | 0. 687223 |
| MFSD14B           | 9q22. 32  | -0. 040667043 | 0. 588852 | 0. 687384 |
| EEF1AKNM1         | 1q24. 3   | 0. 040654489  | 0. 588967 | 0. 687478 |
| ASH2L             | 8p11. 23  | 0. 040648212  | 0. 589025 | 0. 687505 |
| ANKRD49           | 11q21     | -0. 040627289 | 0. 589217 | 0. 687689 |
| OR6X1             | 11q24. 1  | -0. 040615556 | 0. 589325 | 0. 687775 |
| KIR3DL3           | 19q13. 42 | -0. 040606605 | 0. 589407 | 0. 68778  |
| NKTR              | 3p22. 1   | 0. 040604273  | 0. 589428 | 0. 68778  |
| PGPEP1L           | 15q26. 3  | -0. 040601355 | 0. 589455 | 0. 68778  |
| OGDH              | 7p13      | -0. 040600088 | 0. 589467 | 0. 68778  |
| SST               | 3q27. 3   | -0. 040583349 | 0. 58962  | 0. 687919 |
| NPR2              | 9p13. 3   | -0. 040579164 | 0. 589659 | 0. 687923 |
| FOLR3             | 11q13. 4  | 0. 040569741  | 0. 589745 | 0. 687959 |
| OR6P1             | 1q23. 1   | -0. 04056837  | 0. 589758 | 0. 687959 |
| AOX2P             | 2q33. 1   | -0. 04055861  | 0. 589847 | 0. 688023 |
| AMZ1              | 7p22. 3   | -0. 040549893 | 0. 589927 | 0. 688059 |
| LRATD1            | 2p24. 3   | -0. 040547779 | 0. 589947 | 0. 688059 |
| GALP              | 19q13. 43 | -0. 04054216  | 0. 589998 | 0. 688059 |
| PAX2              | 10q24. 31 | -0. 040540235 | 0. 590016 | 0. 688059 |
| NDRG1             | 8q24. 22  | 0. 040528948  | 0. 590119 | 0. 68814  |
| SNORA5A           | 7p13      | -0. 040524668 | 0. 590159 | 0. 688146 |
| SPOCK1            | 5q31. 2   | -0. 040505932 | 0. 590331 | 0. 688306 |
| S1PR4             | 19p13. 3  | 0. 040485008  | 0. 590523 | 0. 68849  |
| TMEM175           | 4p16. 3   | -0. 040476639 | 0. 5906   | 0. 688539 |
| CYBRD1            | 2q31. 1   | -0. 040455715 | 0. 590792 | 0. 688723 |
| TMSB15B           | Xq22. 2   | -0. 040441069 | 0. 590926 | 0. 688815 |
| COX7A2L           | 2p21      | -0. 040438976 | 0. 590946 | 0. 688815 |
| PSG7              | 19q13. 31 | -0. 040435922 | 0. 590974 | 0. 688815 |
| PCDHGA8           | 5q31. 3   | -0. 040418053 | 0. 591138 | 0. 688966 |
| OR13D1            | 9q31. 1   | 0. 040358291  | 0. 591687 | 0. 689566 |
| ZNF280A           | 22q11. 22 | 0. 040347651  | 0. 591785 | 0. 689639 |
| MCMBP             | 10q26. 11 | -0. 040328082 | 0. 591965 | 0. 689791 |
| AHCY              | 20q11. 22 | 0. 040325989  | 0. 591984 | 0. 689791 |
| FUS               | 16p11. 2  | 0. 040321804  | 0. 592022 | 0. 689795 |
| CST9L             | 20p11. 21 | 0. 040302541  | 0. 5922   | 0. 689962 |
| SGCG              | 13q12. 12 | -0. 040296224 | 0. 592258 | 0. 689988 |
| PRR21             | 2q37. 3   | 0. 040292551  | 0. 592291 | 0. 689988 |
| THAP7             | 22q11. 21 | -0. 040284142 | 0. 592369 | 0. 690027 |
| LINC00304         | 16q24. 3  | -0. 040281448 | 0. 592393 | 0. 690027 |
| BEST2             | 19p13. 13 | -0. 04027326  | 0. 592469 | 0. 690074 |
| LINC00608         | 2q35      | 0. 04023979   | 0. 592777 | 0. 690393 |
| STARD6            | 18q21. 2  | 0. 040206291  | 0. 593085 | 0. 690711 |
| SNORD94           | 2p11. 2   | 0. 040187412  | 0. 593259 | 0. 690873 |
| FAM153CP          | 5q35. 3   | -0. 040169287 | 0. 593425 | 0. 691027 |
| COX19             | 7p22. 3   | 0. 040154416  | 0. 593562 | 0. 691146 |
| ANXA2R            | 5p12      | -0. 040139769 | 0. 593697 | 0. 691263 |
| CELA3A            | 1p36. 12  | -0. 040134858 | 0. 593742 | 0. 691272 |
| IFI16             | 1q23. 1   | -0. 0401314   | 0. 593774 | 0. 691272 |
| MRPS18B           | 6p21. 33  | -0. 040110476 | 0. 593967 | 0. 691456 |
| TAF4              | 20q13. 33 | 0. 040066537  | 0. 594371 | 0. 691887 |

|         |            |               |           |           |
|---------|------------|---------------|-----------|-----------|
| GCG     | 2q24. 2    | 0. 040048127  | 0. 594541 | 0. 692044 |
| TAS2R43 | 12p13. 2   | 0. 040039623  | 0. 594619 | 0. 69208  |
| TSC22D3 | Xq22. 3    | -0. 040037244 | 0. 594641 | 0. 69208  |
| WASHC3  | 12q23. 2   | 0. 04002469   | 0. 594757 | 0. 69214  |
| DPRX    | 19q13. 42  | -0. 040024113 | 0. 594762 | 0. 69214  |
| TRIM6   | 11p15. 4   | 0. 040012136  | 0. 594872 | 0. 692173 |
| ALB     | 4q13. 3    | -0. 040010043 | 0. 594892 | 0. 692173 |
| DEFB126 | 20p13      | -0. 040009788 | 0. 594894 | 0. 692173 |
| CLU1    | 12q22      | -0. 039995962 | 0. 595021 | 0. 692256 |
| LRRC3B  | 3p24. 1    | -0. 039993854 | 0. 595041 | 0. 692256 |
| HIC1    | 17p13. 3   | 0. 03998912   | 0. 595085 | 0. 692256 |
| MCRS1   | 12q13. 12  | 0. 039987027  | 0. 595104 | 0. 692256 |
| EXOSC3  | 9p13. 2    | -0. 039978658 | 0. 595181 | 0. 692305 |
| INPP5J  | 22q12. 2   | -0. 039934718 | 0. 595586 | 0. 692736 |
| ARHGAP4 | Xq28       | 0. 039928441  | 0. 595644 | 0. 692763 |
| PRR30   | 2p23. 3    | 0. 039885124  | 0. 596043 | 0. 693187 |
| RNLS    | 10q23. 31  | -0. 039880317 | 0. 596088 | 0. 693198 |
| ZNF410  | 14q24. 3   | 0. 03987404   | 0. 596145 | 0. 693225 |
| FAM153A | 5q35. 3    | 0. 039856276  | 0. 596309 | 0. 693356 |
| COQ2    | 4q21. 22-c | 0. 039851024  | 0. 596358 | 0. 693356 |
| EHHADH  | 3q27. 2    | 0. 039846839  | 0. 596396 | 0. 693356 |
| ZNF534  | 19q13. 41  | 0. 039846839  | 0. 596396 | 0. 693356 |
| BCAT2   | 19q13. 33  | 0. 039840562  | 0. 596454 | 0. 693383 |
| SPINK1  | 5q32       | -0. 039834285 | 0. 596512 | 0. 69341  |
| SLFN12  | 17q12      | 0. 039817547  | 0. 596667 | 0. 693549 |
| PRR11   | 17q22      | 0. 039796831  | 0. 596858 | 0. 693731 |
| FDXACB1 | 11q23. 1   | -0. 039777792 | 0. 597033 | 0. 693895 |
| TCAP    | 17q12      | 0. 039763145  | 0. 597169 | 0. 694011 |
| RPS7    | 2p25. 3    | -0. 039752683 | 0. 597265 | 0. 694083 |
| CEBPE   | 14q11. 2   | 0. 039718399  | 0. 597582 | 0. 694411 |
| CTSS    | 1q21. 3    | 0. 039710836  | 0. 597651 | 0. 694451 |
| FNDC3B  | 3q26. 31   | 0. 039637604  | 0. 598328 | 0. 695121 |
| FOXRED1 | 11q24. 2   | 0. 039635511  | 0. 598347 | 0. 695121 |
| KLF7    | 2q33. 3    | 0. 039635511  | 0. 598347 | 0. 695121 |
| ZNF597  | 16p13. 3   | -0. 039633419 | 0. 598366 | 0. 695121 |
| SLC4A4  | 4q13. 3    | -0. 039622957 | 0. 598463 | 0. 695192 |
| RNF32   | 7q36. 3    | 0. 039606218  | 0. 598618 | 0. 695332 |
| GSTM2P1 | 6q21       | -0. 039573288 | 0. 598922 | 0. 69561  |
| SMIM4   | 3p21. 1    | 0. 039572741  | 0. 598927 | 0. 69561  |
| BRCA1   | 17q21. 31  | 0. 039564371  | 0. 599004 | 0. 69566  |
| MRPL34  | 19p13. 11  | 0. 039560187  | 0. 599043 | 0. 695664 |
| MTMR1   | Xq28       | -0. 039551817 | 0. 59912  | 0. 695713 |
| DDOST   | 1p36. 12   | -0. 039526709 | 0. 599353 | 0. 695943 |
| ABCG1   | 21q22. 3   | -0. 039512062 | 0. 599488 | 0. 696059 |
| OTUB2   | 14q32. 12  | 0. 039495324  | 0. 599643 | 0. 696199 |
| CENPO   | 2p23. 3    | 0. 039478585  | 0. 599798 | 0. 696338 |
| DUX4L6  | 4q35. 2    | 0. 039458852  | 0. 59998  | 0. 696509 |
| OR51A4  | 11p15. 4   | 0. 039419124  | 0. 600348 | 0. 696895 |
| LRIT3   | 4q25       | -0. 039371895 | 0. 600785 | 0. 697362 |
| ZC3HC1  | 7q32. 2    | -0. 039348859 | 0. 600998 | 0. 697531 |
| ATP13A5 | 3q29       | -0. 039348642 | 0. 601    | 0. 697531 |
| MPP4    | 2q33. 1    | -0. 039343829 | 0. 601044 | 0. 697542 |
| TUBB6   | 18p11. 21  | 0. 03933212   | 0. 601153 | 0. 697628 |
| CIAO1   | 2q11. 2    | -0. 039325843 | 0. 601211 | 0. 697654 |

|           |          |              |          |          |
|-----------|----------|--------------|----------|----------|
| MTF2      | 1p22.1   | -0.039317473 | 0.601288 | 0.697704 |
| PGM2      | 4p14     | -0.039269349 | 0.601734 | 0.698164 |
| LOX       | 5q23.1   | -0.039265164 | 0.601773 | 0.698164 |
| NPFFR1    | 10q22.1  | -0.039263295 | 0.60179  | 0.698164 |
| IDI1      | 10p15.3  | 0.03922541   | 0.602141 | 0.698531 |
| ANKRD20A  | 2q13     | -0.039204279 | 0.602337 | 0.69867  |
| LIPI      | 21q11.2  | -0.039201096 | 0.602366 | 0.69867  |
| C10ORF62  | 10q24.2  | -0.039200337 | 0.602373 | 0.69867  |
| SLC13A2   | 17q11.2  | 0.039196443  | 0.602409 | 0.69867  |
| TRIM49    | 11q14.3  | -0.039191592 | 0.602454 | 0.69867  |
| GCNT1     | 9q21.13  | -0.03918984  | 0.60247  | 0.69867  |
| ARHGAP10  | 4q31.23  | -0.039171008 | 0.602645 | 0.698719 |
| ARFGEF1   | 8q13.2   | -0.039166824 | 0.602684 | 0.698719 |
| CXORF51A  | Xq27.3   | 0.039165     | 0.602701 | 0.698719 |
| TTY16     | Yp11.2   | 0.039165     | 0.602701 | 0.698719 |
| OR2J2     | 6p22.1   | 0.039164093  | 0.602709 | 0.698719 |
| LAMP3     | 3q27.1   | 0.039162639  | 0.602723 | 0.698719 |
| ITIH4     | 3p21.1   | 0.039116607  | 0.603149 | 0.699173 |
| TMEM189   | 12q13.13 | 0.03909545   | 0.603345 | 0.69936  |
| INTS5     | 11q12.3  | 0.039078945  | 0.603498 | 0.699461 |
| RO60      | 1q31.2   | -0.039076852 | 0.603518 | 0.699461 |
| VRK1      | 14q32.2  | 0.03907476   | 0.603537 | 0.699461 |
| SSMEM1    | 7q32.2   | -0.039061324 | 0.603662 | 0.699565 |
| ULK4P2    | 15q13.2  | -0.039031871 | 0.603935 | 0.699841 |
| AMY1A     | 1p21.1   | -0.039016863 | 0.604074 | 0.699961 |
| KCTD21    | 11q14.1  | 0.038997343  | 0.604255 | 0.700131 |
| UBE2Q2P2  | 15q25.2  | -0.038982812 | 0.60439  | 0.700246 |
| SPEF1     | 20p13    | -0.038978532 | 0.60443  | 0.700252 |
| PRAMEF4   | 1p36.21  | -0.038966616 | 0.60454  | 0.700339 |
| SFTPD     | 10q22.3  | -0.038953403 | 0.604663 | 0.700441 |
| CEACAM19  | 19q13.31 | 0.03892411   | 0.604935 | 0.700715 |
| GJA10     | 6q15     | 0.038912934  | 0.605039 | 0.700777 |
| SPATA31E1 | 19q22.1  | 0.03890704   | 0.605093 | 0.700777 |
| GPR89B    | 1q21.2   | 0.038906346  | 0.6051   | 0.700777 |
| STMP1     | 7q33     | -0.038903187 | 0.605129 | 0.700777 |
| TMEM31    | Xq22.2   | 0.038897899  | 0.605178 | 0.700786 |
| MBIP      | 14q13.3  | 0.038894817  | 0.605207 | 0.700786 |
| MYADML2   | 17q25.3  | -0.038841806 | 0.605699 | 0.701316 |
| N4BP2L2   | 13q13.1  | 0.038832047  | 0.60579  | 0.70138  |
| DMPK      | 19q13.32 | 0.038798569  | 0.606101 | 0.701699 |
| COPZ1     | 12q13.13 | 0.038794384  | 0.60614  | 0.701704 |
| NCAPD3    | 11q25    | -0.038739983 | 0.606645 | 0.702248 |
| SCYL3     | 1q24.2   | 0.038727429  | 0.606762 | 0.702333 |
| APOC1P1   | 19q13.32 | 0.038722451  | 0.606808 | 0.702333 |
| LCE1F     | 1q21.3   | 0.038719765  | 0.606833 | 0.702333 |
| ADIPOR2   | 12p13.33 | 0.038716967  | 0.606859 | 0.702333 |
| C19ORF18  | 19q13.43 | 0.038673108  | 0.607267 | 0.702747 |
| PROCA1    | 17q11.2  | 0.038670935  | 0.607287 | 0.702747 |
| ZNF90     | 19p12    | -0.038626996 | 0.607696 | 0.703179 |
| SIGLEC14  | 19q13.41 | -0.038621266 | 0.607749 | 0.7032   |
| MTERF3    | 8q22.1   | 0.038614441  | 0.607813 | 0.703233 |
| ONECUT1   | 15q21.3  | -0.038600974 | 0.607938 | 0.703337 |
| MFN1      | 3q26.33  | 0.038572594  | 0.608202 | 0.703563 |
| ELOA3     | 18q21.1  | -0.038572438 | 0.608204 | 0.703563 |



|           |            |               |           |           |
|-----------|------------|---------------|-----------|-----------|
| PRKAA2    | 1p32. 2    | -0. 038566317 | 0. 608261 | 0. 703588 |
| FCGR1A    | 1q21. 2    | -0. 038551671 | 0. 608397 | 0. 703705 |
| CBLB      | 3q13. 11   | -0. 038545394 | 0. 608455 | 0. 703714 |
| SETD5     | 3p25. 3    | -0. 038543301 | 0. 608475 | 0. 703714 |
| FAAH2     | Xp11. 21   | -0. 03853284  | 0. 608572 | 0. 703754 |
| CCDC172   | 10q25. 3   | 0. 038531991  | 0. 60858  | 0. 703754 |
| SH3BP5L   | 1q44       | 0. 038520285  | 0. 608689 | 0. 703839 |
| STPG3     | 9q34. 3    | -0. 038503804 | 0. 608842 | 0. 703976 |
| ABHD15    | 17q11. 2   | -0. 038497269 | 0. 608903 | 0. 704006 |
| SNHG5     | 6q14. 3    | 0. 0384889    | 0. 608981 | 0. 704037 |
| FBX04     | 5p13. 1    | -0. 038486808 | 0. 609001 | 0. 704037 |
| NGLY1     | 3p24. 2    | 0. 038467976  | 0. 609176 | 0. 704199 |
| LMOD2     | 7q31. 32   | -0. 038421332 | 0. 60961  | 0. 704636 |
| SYNPO     | 5q33. 1    | -0. 038419852 | 0. 609624 | 0. 704636 |
| CCDC97    | 19q13. 2   | -0. 038405206 | 0. 609761 | 0. 704752 |
| OLIG2     | 21q22. 11  | 0. 038397686  | 0. 609831 | 0. 70477  |
| KRT75     | 12q13. 13  | -0. 038394833 | 0. 609857 | 0. 70477  |
| HERC2P4   | 16p11. 2   | -0. 038389085 | 0. 609911 | 0. 70477  |
| CRIPAK    | 4p16. 3    | 0. 038388467  | 0. 609917 | 0. 70477  |
| CNIH3     | 1q42. 12   | 0. 03837382   | 0. 610053 | 0. 704868 |
| PCAT18    | 18q11. 2   | 0. 038371722  | 0. 610073 | 0. 704868 |
| SPACA5    | Xp11. 23   | 0. 038311461  | 0. 610634 | 0. 705477 |
| PNMA6A    | Xq28       | -0. 038294311 | 0. 610794 | 0. 7056   |
| APOBEC3H  | 22q13. 1   | 0. 038292419  | 0. 610812 | 0. 7056   |
| DYNLT3    | Xp11. 4    | 0. 038260833  | 0. 611106 | 0. 705881 |
| SPARC     | 5q33. 1    | -0. 038258741 | 0. 611126 | 0. 705881 |
| ITGAX     | 16p11. 2   | 0. 038252464  | 0. 611184 | 0. 705908 |
| FAM86B2   | 8p23. 1    | -0. 038228075 | 0. 611412 | 0. 70613  |
| CHAF1B    | 21q22. 12- | -0. 038218986 | 0. 611496 | 0. 706187 |
| LYPLA1    | 8q11. 23   | 0. 038212709  | 0. 611555 | 0. 706214 |
| FAM228A   | 2p23. 3    | -0. 038199209 | 0. 611681 | 0. 706319 |
| SPINT4    | 20q13. 12  | 0. 038143116  | 0. 612204 | 0. 706882 |
| CCDC169   | 13q13. 3   | 0. 038134463  | 0. 612285 | 0. 706918 |
| BBS12     | 4q27       | -0. 038132173 | 0. 612306 | 0. 706918 |
| OR2AG2    | 11p15. 4   | 0. 038080563  | 0. 612788 | 0. 707434 |
| LCE3A     | 1q21. 3    | 0. 038075278  | 0. 612838 | 0. 70745  |
| SIGLEC16  | 19q13. 33  | -0. 038059967 | 0. 61298  | 0. 707533 |
| C11ORF88  | 11q23. 1   | -0. 038059931 | 0. 612981 | 0. 707533 |
| MIR1-1HG- | 20q13. 33  | 0. 038049204  | 0. 613081 | 0. 707608 |
| ZCCHC17   | 1p35. 2    | -0. 038022324 | 0. 613332 | 0. 707837 |
| TTY2      | Yp11. 2    | -0. 038020407 | 0. 61335  | 0. 707837 |
| SF3B5     | 6q24. 2    | -0. 037986734 | 0. 613664 | 0. 708159 |
| POM121L4F | 22q11. 21  | -0. 037932452 | 0. 614172 | 0. 708703 |
| GAL3ST4   | 7q22. 1    | 0. 037898855  | 0. 614486 | 0. 709025 |
| RAB40C    | 16p13. 3   | 0. 037884209  | 0. 614623 | 0. 709142 |
| TXNDC2    | 18p11. 22  | 0. 037869623  | 0. 614759 | 0. 709258 |
| PLEKHD1   | 14q24. 1   | 0. 037856482  | 0. 614882 | 0. 709352 |
| KIAA0895L | 16q22. 1   | -0. 037846547 | 0. 614975 | 0. 709352 |
| ZNF266    | 19p13. 2   | 0. 037842362  | 0. 615014 | 0. 709352 |
| LEFTY2    | 1q42. 12   | -0. 037841398 | 0. 615023 | 0. 709352 |
| ELOVL7    | 5q12. 1    | 0. 037838177  | 0. 615053 | 0. 709352 |
| SWSAP1    | 19p13. 2   | 0. 037838177  | 0. 615053 | 0. 709352 |
| CYC1      | 8q24. 3    | 0. 037781684  | 0. 615581 | 0. 709872 |
| COMMD2    | 3q25. 1    | 0. 037779591  | 0. 615601 | 0. 709872 |

|                    |              |          |          |
|--------------------|--------------|----------|----------|
| DOCK8-AS19p24. 3   | -0.037778565 | 0.615611 | 0.709872 |
| TBK1 6p21. 1       | -0.037764945 | 0.615738 | 0.709978 |
| HOXC12 12q13. 13   | -0.037748198 | 0.615895 | 0.710099 |
| SLC37A3 7q34       | -0.037746113 | 0.615914 | 0.710099 |
| PPP3R1 2p14        | 0.037737764  | 0.615992 | 0.710148 |
| SLC24A1 15q22. 31  | -0.037718913 | 0.616169 | 0.71031  |
| OR5M10 11q12. 1    | -0.037714445 | 0.61621  | 0.710318 |
| TRAPPC1 17p13. 1   | 0.037668696  | 0.616639 | 0.71077  |
| VPREB1 22q11. 22   | -0.037653627 | 0.61678  | 0.710892 |
| FAM167B 1p35. 2    | -0.037649865 | 0.616815 | 0.710892 |
| AGAP5 10q22. 2     | 0.03764568   | 0.616854 | 0.710896 |
| B3GNT9 16q22. 1    | 0.037641496  | 0.616893 | 0.7109   |
| SNORA58 3q22. 1    | -0.037614808 | 0.617143 | 0.711111 |
| NR4A2 2q24. 1      | -0.037614295 | 0.617148 | 0.711111 |
| SNORA65 9q33. 3    | -0.037608541 | 0.617202 | 0.711133 |
| ZFR2 19p13. 3      | -0.037602862 | 0.617255 | 0.711153 |
| HMHB1 5q31. 3      | 0.037579768  | 0.617471 | 0.711361 |
| CHIA 1p13. 2       | -0.03757108  | 0.617553 | 0.711385 |
| NAALADL1 11q13. 1  | 0.037566171  | 0.617599 | 0.711385 |
| LRRC14 8q24. 3     | 0.037564078  | 0.617618 | 0.711385 |
| ENDOU 12q13. 11    | 0.037560601  | 0.617651 | 0.711385 |
| RNF123 3p21. 31    | 0.037557801  | 0.617677 | 0.711385 |
| CLDN6 16p13. 3     | 0.037554717  | 0.617706 | 0.711385 |
| SPSB1 1p36. 22     | 0.037536878  | 0.617873 | 0.711537 |
| MAEA 4p16. 3       | 0.037497123  | 0.618246 | 0.711916 |
| PHACTR2-A 6q24. 2  | -0.037494174 | 0.618273 | 0.711916 |
| RNASE8 14q11. 2    | -0.037453419 | 0.618656 | 0.712303 |
| TMPRSS11A 4q13. 2  | 0.03744801   | 0.618706 | 0.712303 |
| NOP2 12p13. 31     | 0.037446906  | 0.618717 | 0.712303 |
| ZFYVE28 4p16. 3    | 0.037442722  | 0.618756 | 0.712307 |
| ANKRD36B 2q11. 2   | 0.037417613  | 0.618991 | 0.712537 |
| ACER2 9p22. 1      | 0.037386228  | 0.619286 | 0.712835 |
| OR6M1 11q24. 1     | -0.0373302   | 0.619811 | 0.713399 |
| C17ORF49 17p13. 1  | 0.037304626  | 0.620051 | 0.713619 |
| RAB17 2q37. 3      | 0.037298349  | 0.62011  | 0.713619 |
| URGCP 7p13         | 0.037298349  | 0.62011  | 0.713619 |
| SMIM10 Xq26. 3     | -0.03728998  | 0.620189 | 0.713669 |
| POLE 12q24. 33     | 0.037283703  | 0.620247 | 0.713695 |
| INTS12 4q24        | 0.037277426  | 0.620306 | 0.713722 |
| ZNF474 5q23. 2     | -0.037273436 | 0.620344 | 0.713724 |
| TRPV3 17p13. 2     | 0.03722934   | 0.620758 | 0.714159 |
| EDNRA 4q31. 22-c   | 0.037208378  | 0.620955 | 0.714303 |
| PSMB5 14q11. 2     | -0.037208378 | 0.620955 | 0.714303 |
| CASC15 6p22. 3     | 0.037197935  | 0.621053 | 0.714375 |
| ANKRD30BF 21q11. 2 | 0.037193291  | 0.621096 | 0.714383 |
| OR4D11 11q12. 1    | 0.037189588  | 0.621131 | 0.714383 |
| PTK2B 8p21. 2      | 0.037181177  | 0.62121  | 0.714433 |
| NUP54 4q21. 1      | -0.037162346 | 0.621387 | 0.714595 |
| MAP4K2 11q13. 1    | 0.037145607  | 0.621544 | 0.71471  |
| SBDS 7q11. 21      | 0.037141422  | 0.621583 | 0.71471  |
| SPPL2A 15q21. 2    | -0.037137238 | 0.621623 | 0.71471  |
| SPHKAP 2q36. 3     | -0.037135085 | 0.621643 | 0.71471  |
| TBX2 17q23. 2      | 0.037130961  | 0.621682 | 0.71471  |
| RP9 7p14. 3        | 0.037128868  | 0.621701 | 0.71471  |

|           |                      |               |           |           |
|-----------|----------------------|---------------|-----------|-----------|
| EIF4H     | 7q11. 23             | 0. 037112129  | 0. 621859 | 0. 71485  |
| CRX       | 19q13. 33            | 0. 037073231  | 0. 622224 | 0. 715229 |
| ASMTL     | Xp22. 33 $\epsilon$  | -0. 037064005 | 0. 622311 | 0. 715287 |
| FKSG29    | 13q32. 3             | -0. 037040403 | 0. 622533 | 0. 715501 |
| RPS2P32   | 7p15. 3              | 0. 037017973  | 0. 622744 | 0. 715694 |
| SNORA16A  | 1p35. 3              | -0. 037014961 | 0. 622772 | 0. 715694 |
| GABBR1    | 6p22. 1              | -0. 037009604 | 0. 622822 | 0. 71571  |
| NOA1      | 4q12                 | 0. 037001234  | 0. 622901 | 0. 71576  |
| SOAT2     | 12q13. 13            | -0. 036984818 | 0. 623055 | 0. 715896 |
| ZPBP2     | 17q21. 1             | 0. 036977041  | 0. 623128 | 0. 715939 |
| ANKIB1    | 7q21. 2              | -0. 036959387 | 0. 623295 | 0. 716088 |
| ARHGAP33  | 19q13. 12            | 0. 03695311   | 0. 623354 | 0. 716115 |
| XRCC6P5   | Xq22. 1              | -0. 036934751 | 0. 623526 | 0. 716272 |
| CILP2     | 19p13. 11            | -0. 036923837 | 0. 623629 | 0. 716349 |
| OR2F1     | 7q35                 | -0. 036919979 | 0. 623665 | 0. 716349 |
| GTPBP4    | 10p15. 3             | 0. 036900801  | 0. 623846 | 0. 716516 |
| NR6A1     | 9q33. 3              | 0. 036867517  | 0. 624159 | 0. 716834 |
| FAM227A   | 22q13. 1             | -0. 036856862 | 0. 624259 | 0. 716908 |
| C16ORF46  | 16q23. 2             | 0. 036829661  | 0. 624515 | 0. 717161 |
| PLEKHA8   | 7p14. 3              | -0. 036825477 | 0. 624555 | 0. 717165 |
| AWAT2     | Xq13. 1              | -0. 036808902 | 0. 624711 | 0. 717303 |
| LINC00051 | 18q24. 3             | 0. 036801173  | 0. 624783 | 0. 717345 |
| TCAM1P    | 17q23. 3             | -0. 03679546  | 0. 624837 | 0. 717358 |
| GOLGA7B   | 10q24. 2             | -0. 036785722 | 0. 624929 | 0. 717358 |
| PRTFDC1   | 10p12. 1             | 0. 036785722  | 0. 624929 | 0. 717358 |
| CGREF1    | 2p23. 3              | 0. 036784695  | 0. 624938 | 0. 717358 |
| TAS1R3    | 1p36. 33             | 0. 036754375  | 0. 625224 | 0. 717645 |
| PTPRVP    | 1q32. 1              | 0. 036727376  | 0. 625478 | 0. 717896 |
| ATL2      | 2p22. 2-p $\epsilon$ | 0. 036641349  | 0. 626289 | 0. 718743 |
| LRRC32    | 11q13. 5             | 0. 036641349  | 0. 626289 | 0. 718743 |
| LAIR2     | 19q13. 42            | -0. 036620047 | 0. 62649  | 0. 718932 |
| PMPCB     | 7q22. 1              | -0. 036605779 | 0. 626624 | 0. 719046 |
| ESX1      | Xq22. 2              | -0. 036597047 | 0. 626706 | 0. 719076 |
| LINC00685 | Xp22. 33 $\epsilon$  | 0. 036595317  | 0. 626723 | 0. 719076 |
| C12ORF50  | 12q21. 32            | -0. 03657122  | 0. 62695  | 0. 719296 |
| OR10P1    | 12q13. 2             | 0. 036554139  | 0. 627111 | 0. 719439 |
| PRDM13    | 6q16. 2              | -0. 036542673 | 0. 627219 | 0. 719522 |
| SNHG10    | 14q32. 13            | 0. 036515808  | 0. 627472 | 0. 719771 |
| SLC28A3   | 9q21. 32-c           | -0. 03647729  | 0. 627836 | 0. 720141 |
| TJAP1     | 6p21. 1              | 0. 036473961  | 0. 627867 | 0. 720141 |
| PINK1     | 1p36. 12             | -0. 036459314 | 0. 628005 | 0. 720258 |
| MTMR2     | 11q21                | 0. 036436298  | 0. 628223 | 0. 720425 |
| PPIB      | 15q22. 31            | 0. 036436298  | 0. 628223 | 0. 720425 |
| KRTAP2-1  | 17q21. 2             | 0. 03643032   | 0. 628279 | 0. 720448 |
| ZNF766    | 19q13. 41            | 0. 036400728  | 0. 628558 | 0. 720727 |
| SLC24A2   | 9p22. 1-p $\epsilon$ | 0. 036395554  | 0. 628607 | 0. 720742 |
| RHBDD1    | 2q36. 3              | -0. 03637562  | 0. 628795 | 0. 720841 |
| RNASE11   | 14q11. 2             | 0. 036374351  | 0. 628807 | 0. 720841 |
| PLA2G2C   | 1p36. 12             | -0. 03636865  | 0. 628861 | 0. 720841 |
| ACOX3     | 4p16. 1              | 0. 03636725   | 0. 628874 | 0. 720841 |
| SLC16A13  | 17p13. 1             | 0. 03636725   | 0. 628874 | 0. 720841 |
| SP3       | 2q31. 1              | -0. 036354696 | 0. 628993 | 0. 720936 |
| CNGB1     | 16q21                | 0. 036345192  | 0. 629083 | 0. 720997 |
| HPS6      | 10q24. 32            | 0. 036333773  | 0. 62919  | 0. 72108  |

|           |           |               |           |           |
|-----------|-----------|---------------|-----------|-----------|
| FCRL4     | 1q23. 1   | 0. 036311609  | 0. 6294   | 0. 721269 |
| VIM       | 10p13     | -0. 036308664 | 0. 629428 | 0. 721269 |
| SATB2-AS1 | 12q33. 1  | -0. 036291669 | 0. 629588 | 0. 721411 |
| OR6N1     | 1q23. 1   | 0. 036284457  | 0. 629656 | 0. 721443 |
| PARP2     | 14q11. 2  | 0. 036277279  | 0. 629724 | 0. 721443 |
| TAOK3     | 12q24. 23 | -0. 036277279 | 0. 629724 | 0. 721443 |
| MOXD2P    | 7q34      | 0. 036263889  | 0. 62985  | 0. 721547 |
| CLUHP3    | 16p11. 2  | 0. 036248005  | 0. 630001 | 0. 721677 |
| SERPINA5  | 14q32. 13 | 0. 036237524  | 0. 6301   | 0. 721749 |
| CLEC12A   | 12p13. 31 | -0. 036223943 | 0. 630228 | 0. 721829 |
| RPP40     | 6p25. 1   | -0. 036219758 | 0. 630267 | 0. 721829 |
| DNAJC13   | 3q22. 1   | 0. 036218693  | 0. 630278 | 0. 721829 |
| ZMAT4     | 8p11. 21  | -0. 036207291 | 0. 630385 | 0. 721882 |
| REP15     | 12p11. 22 | 0. 036206139  | 0. 630396 | 0. 721882 |
| PCARE     | 2p23. 2   | -0. 036187528 | 0. 630572 | 0. 722042 |
| C4ORF19   | 4p14      | 0. 036164292  | 0. 630792 | 0. 722252 |
| SLC28A2   | 15q21. 1  | 0. 036151833  | 0. 630909 | 0. 722328 |
| UTP14A    | Xq26. 1   | 0. 036149645  | 0. 63093  | 0. 722328 |
| AVIL      | 12q14. 1  | -0. 036072228 | 0. 631662 | 0. 723125 |
| INSL4     | 9p24. 1   | 0. 036056365  | 0. 631812 | 0. 723255 |
| IL4R      | 16p12. 1  | 0. 036036658  | 0. 631999 | 0. 723427 |
| TAF6L     | 11q12. 3  | -0. 036032473 | 0. 632038 | 0. 723431 |
| STKLD1    | 9q34. 2   | -0. 036023095 | 0. 632127 | 0. 723484 |
| MEG3      | 14q32. 2  | -0. 036019919 | 0. 632157 | 0. 723484 |
| SPATS1    | 6p21. 1   | -0. 035994262 | 0. 6324   | 0. 723714 |
| MGC15885  | 15q22. 2  | -0. 035991012 | 0. 632431 | 0. 723714 |
| AGXT      | 2q37. 3   | 0. 035982597  | 0. 63251  | 0. 723764 |
| SVIP      | 11p14. 3  | -0. 035973887 | 0. 632593 | 0. 723817 |
| ARL9      | 4q12      | -0. 035879731 | 0. 633484 | 0. 724776 |
| UFSP1     | 7q22. 1   | -0. 035877639 | 0. 633504 | 0. 724776 |
| ZNF7      | 8q24. 3   | 0. 035865085  | 0. 633623 | 0. 724814 |
| CLEC5A    | 7q34      | 0. 0358609    | 0. 633663 | 0. 724814 |
| MST1      | 3p21. 31  | 0. 0358609    | 0. 633663 | 0. 724814 |
| RFX1      | 19p13. 12 | 0. 035858808  | 0. 633682 | 0. 724814 |
| C2ORF83   | 2q36. 3   | -0. 035850131 | 0. 633765 | 0. 724867 |
| LINC01596 | 14q21. 3  | 0. 035836917  | 0. 63389  | 0. 724969 |
| C8B       | 1p32. 2   | 0. 035815309  | 0. 634094 | 0. 725161 |
| DAZ3      | Yq11. 23  | -0. 035811098 | 0. 634134 | 0. 725165 |
| CLRN1     | 3q25. 1   | 0. 035780102  | 0. 634428 | 0. 72546  |
| ZNF133    | 20p11. 23 | 0. 035773021  | 0. 634495 | 0. 725495 |
| UBE2U     | 1p31. 3   | -0. 035739242 | 0. 634815 | 0. 72582  |
| NOD1      | 7p14. 3   | 0. 035733266  | 0. 634872 | 0. 725843 |
| DERL3     | 22q11. 23 | 0. 035700854  | 0. 635179 | 0. 726153 |
| TEX26     | 13q12. 3  | -0. 035678097 | 0. 635395 | 0. 726357 |
| ERAS      | Xp11. 23  | -0. 035674362 | 0. 63543  | 0. 726357 |
| OR2AG1    | 11p15. 4  | -0. 035663372 | 0. 635535 | 0. 726434 |
| LILRA4    | 19q13. 42 | 0. 035610799  | 0. 636033 | 0. 726963 |
| MED10     | 5p15. 31  | -0. 035588894 | 0. 636241 | 0. 727159 |
| HBZ       | 16p13. 3  | -0. 035564573 | 0. 636472 | 0. 727381 |
| LINC01366 | 5q35. 1   | 0. 035556458  | 0. 636549 | 0. 727427 |
| FBXW4     | 10q24. 32 | 0. 035513569  | 0. 636956 | 0. 727851 |
| NDUFAF1   | 15q15. 1  | 0. 03549683   | 0. 637115 | 0. 727957 |
| DAPL1     | 2q24. 1   | -0. 03549475  | 0. 637134 | 0. 727957 |
| LALBA     | 12q13. 11 | 0. 035492177  | 0. 637159 | 0. 727957 |

|           |            |              |          |          |
|-----------|------------|--------------|----------|----------|
| DPH2      | 1p34. 1    | -0.035488461 | 0.637194 | 0.727957 |
| IFNA7     | 9p21. 3    | -0.035456584 | 0.637497 | 0.728261 |
| ERICH6B   | 13q14. 13  | 0.035442723  | 0.637628 | 0.728369 |
| TRIM52    | 5q35. 3    | -0.03542569  | 0.63779  | 0.728513 |
| TBXAS1    | 7q34       | -0.035406859 | 0.637969 | 0.728675 |
| ZNF337    | 20p11. 21  | -0.035400582 | 0.638029 | 0.728702 |
| CHRNA6    | 8p11. 21   | -0.035394038 | 0.638091 | 0.728731 |
| NPDC1     | 9q34. 3    | 0.03539012   | 0.638128 | 0.728732 |
| C2CD2L    | 11q23. 3   | -0.035373381 | 0.638287 | 0.728872 |
| SLC29A1   | 6p21. 1    | -0.035348273 | 0.638526 | 0.729103 |
| OR13F1    | 9q31. 1    | -0.03533896  | 0.638614 | 0.729162 |
| HTRA1     | 10q26. 13  | 0.035300149  | 0.638983 | 0.729541 |
| RASD2     | 22q12. 3   | 0.035289705  | 0.639082 | 0.729613 |
| OR10A5    | 11p15. 4   | 0.035281077  | 0.639164 | 0.729665 |
| PRR23C    | 3q23       | 0.035270347  | 0.639266 | 0.729694 |
| LSM2      | 6p21. 33   | 0.035268763  | 0.639281 | 0.729694 |
| SPATA8    | 15q26. 2   | -0.035266845 | 0.639299 | 0.729694 |
| SRSF1     | 17q22      | 0.035262486  | 0.639341 | 0.7297   |
| OXNAD1    | 3p25. 1-p2 | -0.035249932 | 0.63946  | 0.729795 |
| GNGT1     | 7q21. 3    | 0.035237107  | 0.639582 | 0.72988  |
| TNFSF18   | 1q25. 1    | -0.035234406 | 0.639608 | 0.72988  |
| STK10     | 5q35. 1    | -0.035226916 | 0.639679 | 0.729919 |
| BBOX1     | 11p14. 2   | 0.035214863  | 0.639794 | 0.730008 |
| PPIG      | 2q31. 1    | 0.035201808  | 0.639918 | 0.730108 |
| SNORA77   | 1q32. 1    | 0.035176587  | 0.640158 | 0.73034  |
| TWSG1     | 18p11. 22  | -0.035118114 | 0.640714 | 0.730895 |
| SOX14     | 3q22. 3    | -0.035117772 | 0.640717 | 0.730895 |
| GORAB     | 1q24. 2    | 0.035034419  | 0.641511 | 0.731717 |
| MDM4      | 1q32. 1    | 0.035034419  | 0.641511 | 0.731717 |
| MED30     | 8q24. 11   | 0.035021865  | 0.64163  | 0.731811 |
| RNF220    | 1p34. 1    | -0.035003034 | 0.641809 | 0.731974 |
| PAMR1     | 11p13      | -0.034996757 | 0.641869 | 0.732    |
| CELSR3    | 3p21. 31   | 0.034986295  | 0.641969 | 0.732072 |
| FBX07     | 22q12. 3   | -0.034938171 | 0.642427 | 0.732553 |
| UGT1A5    | 2q37. 1    | 0.034919814  | 0.642602 | 0.732697 |
| HNRNPM    | 19p13. 2   | -0.034917247 | 0.642627 | 0.732697 |
| XPO6      | 16p12. 1   | 0.034904693  | 0.642746 | 0.732772 |
| NCL       | 2q37. 1    | 0.034902601  | 0.642766 | 0.732772 |
| RNF114    | 20q13. 13  | -0.034896324 | 0.642826 | 0.732799 |
| CCDC157   | 22q12. 2   | -0.034864938 | 0.643125 | 0.733098 |
| SFXN2     | 10q24. 32  | -0.034842987 | 0.643334 | 0.733295 |
| CXCL10    | 4q21. 1    | 0.034835645  | 0.643404 | 0.733332 |
| OR1L3     | 9q33. 2    | -0.0348244   | 0.643511 | 0.733413 |
| TRIM22    | 11p15. 4   | -0.034818907 | 0.643564 | 0.733431 |
| NAGLU     | 17q21. 2   | -0.034814722 | 0.643604 | 0.733434 |
| SMR3A     | 4q13. 3    | -0.034802555 | 0.64372  | 0.733525 |
| KPNA2     | 17q24. 2   | 0.034785429  | 0.643883 | 0.733627 |
| PHLDB3    | 19q13. 31  | -0.034785429 | 0.643883 | 0.733627 |
| SPRY2     | 13q31. 1   | 0.034777059  | 0.643963 | 0.733657 |
| LYNX1     | 8q24. 3    | 0.034774967  | 0.643983 | 0.733657 |
| PPM1M     | 3p21. 2    | 0.034760321  | 0.644122 | 0.733751 |
| SYS1-DBN1 | 20q13. 12  | -0.034758592 | 0.644139 | 0.733751 |
| GHRLOS    | 3p25. 3    | 0.034749859  | 0.644222 | 0.733804 |
| CYP27A1   | 2q35       | 0.034741489  | 0.644302 | 0.733853 |

|          |           |              |          |          |
|----------|-----------|--------------|----------|----------|
| TMEM204  | 16p13.3   | 0.034728935  | 0.644422 | 0.733948 |
| PRDM9    | 5p14.2    | -0.034714033 | 0.644564 | 0.734068 |
| OR1G1    | 17p13.3   | 0.034673898  | 0.644947 | 0.734462 |
| CLEC12B  | 12p13.2   | -0.034629309 | 0.645372 | 0.734905 |
| TBC1D9B  | 5q35.3    | -0.034622225 | 0.64544  | 0.73494  |
| C10RF115 | 1q41      | 0.034611763  | 0.64554  | 0.735012 |
| PPY      | 17q21.31  | -0.034599155 | 0.64566  | 0.735107 |
| GSTA5    | 6p12.2    | -0.034546446 | 0.646163 | 0.735638 |
| KRTAP4-3 | 17q21.2   | 0.034535451  | 0.646268 | 0.735716 |
| PWRN2    | 15q11.2   | -0.034529656 | 0.646323 | 0.735737 |
| HIST1H4D | 6p22.2    | 0.034512108  | 0.646491 | 0.735886 |
| ADM5     | 19q13.33  | -0.034479945 | 0.646798 | 0.736193 |
| MBNL2    | 13q32.1   | 0.03447576   | 0.646838 | 0.736197 |
| FAM219B  | 15q24.1-c | 0.034446467  | 0.647118 | 0.736474 |
| SCARNA4  | 1q22      | 0.034412688  | 0.647441 | 0.736776 |
| CCNB1IP1 | 14q11.2   | -0.034410897 | 0.647458 | 0.736776 |
| HMGXB4   | 22q12.3   | -0.034392066 | 0.647638 | 0.736939 |
| CSNK1A1  | 5q32      | 0.034383696  | 0.647718 | 0.736952 |
| MYLPF    | 16p11.2   | -0.034379909 | 0.647754 | 0.736952 |
| DLEU2L   | 1p31.3    | -0.034379341 | 0.64776  | 0.736952 |
| LOC90246 | 3q21.3    | -0.034373235 | 0.647818 | 0.736976 |
| MATN1    | 1p35.2    | -0.034356474 | 0.647978 | 0.737097 |
| HNRNPU   | 1q44      | -0.034354403 | 0.647998 | 0.737097 |
| CAPRIN1  | 11p13     | 0.03433348   | 0.648198 | 0.737283 |
| SLC5A10  | 17p11.2   | 0.034317387  | 0.648352 | 0.737416 |
| TMA7     | 3p21.31   | -0.034310464 | 0.648418 | 0.737449 |
| SPATA25  | 20q13.12  | 0.034306315  | 0.648458 | 0.737452 |
| THAP11   | 16q22.1   | -0.034300002 | 0.648518 | 0.737479 |
| VAMP4    | 1q24.3    | -0.03426234  | 0.648878 | 0.737808 |
| ANGPT2   | 8p23.1    | 0.034258155  | 0.648918 | 0.737808 |
| ZDHHC20  | 13q12.11  | 0.034258155  | 0.648918 | 0.737808 |
| SMTNL1   | 11q12.1   | 0.034242437  | 0.649069 | 0.737925 |
| IQCF6    | 3p21.2    | -0.034239201 | 0.6491   | 0.737925 |
| SNORA66  | 1p22.1    | -0.034235866 | 0.649131 | 0.737925 |
| ATF3     | 1q32.3    | -0.034187015 | 0.649599 | 0.738414 |
| GUCA2A   | 1p34.2    | -0.034161301 | 0.649845 | 0.738652 |
| HOXA2    | 7p15.2    | 0.034142047  | 0.650029 | 0.738819 |
| SYK      | 9q22.2    | 0.034124244  | 0.6502   | 0.738971 |
| TAS2R60  | 7q35      | 0.034110653  | 0.65033  | 0.739077 |
| FRG2C    | 3p12.3    | 0.034099565  | 0.650436 | 0.739155 |
| USP32P1  | 17p11.2   | -0.034069843 | 0.65072  | 0.739437 |
| CYCS     | 7p15.3    | -0.034061473 | 0.650801 | 0.739486 |
| OSTC     | 4q25      | -0.034025903 | 0.651141 | 0.739831 |
| DI03     | 14q32.31  | 0.034013349  | 0.651262 | 0.739925 |
| VWA5B1   | 1p36.12   | 0.033998745  | 0.651401 | 0.740042 |
| NDUFA6   | 22q13.2   | -0.033984056 | 0.651542 | 0.74016  |
| OVCA2    | 17p13.3   | -0.033977779 | 0.651602 | 0.740186 |
| DHX15    | 4p15.2    | -0.033950579 | 0.651863 | 0.74044  |
| NPY6R    | 5q31.2    | 0.033926972  | 0.652089 | 0.740655 |
| MIR22HG  | 17p13.3   | -0.033910824 | 0.652244 | 0.740789 |
| TMEM170A | 16q23.1   | 0.033904547  | 0.652304 | 0.740796 |
| STMN1    | 1p36.11   | 0.033902454  | 0.652324 | 0.740796 |
| SUCLG1   | 2p11.2    | -0.033887808 | 0.652465 | 0.740881 |
| RUNX2    | 6p21.1    | 0.033883623  | 0.652505 | 0.740881 |

|            |            |              |          |          |
|------------|------------|--------------|----------|----------|
| FAM224B    | Yq11. 222  | -0.033883017 | 0.65251  | 0.740881 |
| CCDC142    | 2p13. 1    | -0.033871069 | 0.652625 | 0.740969 |
| FKBP6      | 7q11. 23   | 0.033865116  | 0.652682 | 0.740992 |
| FMO4       | 1q24. 3    | -0.033858515 | 0.652745 | 0.741002 |
| RIBC1      | Xp11. 22   | -0.033856422 | 0.652765 | 0.741002 |
| ZC3H15     | 2q32. 1    | -0.033831314 | 0.653006 | 0.741216 |
| TUBA3E     | 2q21. 1    | -0.033829028 | 0.653028 | 0.741216 |
| STX5       | 11q12. 3   | 0.033820852  | 0.653107 | 0.741263 |
| FAM120A    | 9q22. 31   | 0.033812483  | 0.653187 | 0.741312 |
| MRPL42P5   | 15q15. 1   | 0.033784254  | 0.653458 | 0.741577 |
| CCL27      | 9p13. 3    | -0.033773651 | 0.653559 | 0.741645 |
| ZNF33B     | 10q11. 21  | -0.033768544 | 0.653608 | 0.741645 |
| OSBP       | 11q12. 1   | -0.033766451 | 0.653628 | 0.741645 |
| C3ORF38    | 3p11. 1    | 0.033761238  | 0.653678 | 0.741659 |
| OR2G2      | 1q44       | 0.033751138  | 0.653775 | 0.741727 |
| BCL6       | 3q27. 3    | 0.033735066  | 0.653929 | 0.74184  |
| TBX1       | 22q11. 21  | -0.033733044 | 0.653949 | 0.74184  |
| REEP1      | 2p11. 2    | -0.033720419 | 0.65407  | 0.741935 |
| DHX30      | 3p21. 31   | 0.033709958  | 0.65417  | 0.742007 |
| NPM2       | 8p21. 3    | -0.033701588 | 0.654251 | 0.742056 |
| HECTD2-AS1 | 10q23. 32  | 0.033678017  | 0.654477 | 0.74227  |
| CD1C       | 1q23. 1    | -0.033664989 | 0.654602 | 0.742335 |
| OR52L1     | 11p15. 4   | 0.033664365  | 0.654608 | 0.742335 |
| CDK4       | 12q14. 1   | -0.033659741 | 0.654652 | 0.742343 |
| GPAT2      | 2q11. 2    | 0.033645094  | 0.654793 | 0.74246  |
| TRAM1      | 8q13. 3    | -0.033628356 | 0.654954 | 0.742599 |
| CRYM       | 16p12. 2   | 0.033622079  | 0.655014 | 0.742599 |
| FAM183BP   | 7p14. 1    | 0.033620737  | 0.655027 | 0.742599 |
| SLC12A7    | 5p15. 33   | 0.033613709  | 0.655094 | 0.742614 |
| TOP1       | 20q12      | 0.033611617  | 0.655114 | 0.742614 |
| RTP1       | 3q27. 3    | 0.033601971  | 0.655207 | 0.742677 |
| EIF2B1     | 12q24. 31  | 0.033580231  | 0.655416 | 0.74281  |
| LINC00634  | 22q13. 2   | 0.033578225  | 0.655435 | 0.74281  |
| BCRP3      | 22q11. 23  | -0.033578139 | 0.655436 | 0.74281  |
| CHRNA10    | 11p15. 4   | -0.033519553 | 0.655999 | 0.743406 |
| MARVELD2   | 5q13. 2    | -0.033502814 | 0.656159 | 0.743546 |
| EEF1A2     | 20q13. 33  | -0.033486075 | 0.65632  | 0.743686 |
| FKBP3      | 14q21. 2   | 0.033479798  | 0.656381 | 0.743712 |
| DEFB4A     | 8p23. 1    | -0.033465369 | 0.656519 | 0.743827 |
| LOC340357  | 8p23. 1-p2 | -0.033443047 | 0.656734 | 0.744028 |
| SLC25A47   | 14q32. 2   | 0.033425536  | 0.656902 | 0.744176 |
| L3HYPDH    | 14q23. 1   | -0.033381458 | 0.657326 | 0.744598 |
| LOR        | 1q21. 3    | -0.033378353 | 0.657356 | 0.744598 |
| KRTAP10-1  | 21q22. 3   | -0.033375163 | 0.657386 | 0.744598 |
| OR2T12     | 1q44       | -0.033362778 | 0.657505 | 0.744649 |
| TTY18      | Yp11. 2    | 0.033362778  | 0.657505 | 0.744649 |
| LIPT2      | 11q13. 4   | -0.033350072 | 0.657628 | 0.744745 |
| RNF219     | 13q31. 1   | 0.033345887  | 0.657668 | 0.744748 |
| ZNF646     | 16p11. 2   | -0.033310317 | 0.65801  | 0.745054 |
| SNORA5C    | 7p13       | 0.033310056  | 0.658013 | 0.745054 |
| POM121L2   | 6p22. 1    | -0.033298495 | 0.658124 | 0.745138 |
| GLT6D1     | 9q34. 3    | 0.033283006  | 0.658273 | 0.745264 |
| DOCK9      | 13q32. 3   | -0.03327684  | 0.658332 | 0.74527  |
| SLC66A1    | 1p36. 13   | -0.033274747 | 0.658352 | 0.74527  |

|           |              |               |           |           |
|-----------|--------------|---------------|-----------|-----------|
| FLJ25758  | 19p13. 2     | 0. 033259043  | 0. 658503 | 0. 745399 |
| RASA2     | 3q23         | -0. 033239177 | 0. 658694 | 0. 745573 |
| COL16A1   | 1p35. 2      | -0. 033203607 | 0. 659037 | 0. 745918 |
| CDIPT     | 16p11. 2     | 0. 033195238  | 0. 659117 | 0. 745967 |
| RHEBL1    | 12q13. 12    | 0. 033174314  | 0. 659319 | 0. 746153 |
| CACFD1    | 9q34. 2      | 0. 03316176   | 0. 65944  | 0. 746247 |
| CHTF8     | 16q22. 1     | -0. 033132467 | 0. 659722 | 0. 746455 |
| LRRC10    | 12q15        | 0. 033131691  | 0. 659729 | 0. 746455 |
| SNORA15   | 7p11. 2      | 0. 033131097  | 0. 659735 | 0. 746455 |
| RTP3      | 3p21. 31     | -0. 033116867 | 0. 659872 | 0. 746567 |
| SOWAHD    | Xq24         | 0. 033088528  | 0. 660145 | 0. 746834 |
| PCED1A    | 20p13        | -0. 033080158 | 0. 660225 | 0. 746883 |
| SPI1      | 11p11. 2     | 0. 033075973  | 0. 660266 | 0. 746886 |
| SLC38A6   | 14q23. 1     | 0. 033050865  | 0. 660508 | 0. 747117 |
| NAB2      | 12q13. 3     | 0. 03301948   | 0. 66081  | 0. 747417 |
| LYL1      | 19p13. 13    | 0. 03301111   | 0. 660891 | 0. 747466 |
| GRIN1     | 9q34. 3      | -0. 03297139  | 0. 661273 | 0. 747857 |
| MOB4      | 2q33. 1      | 0. 032923231  | 0. 661738 | 0. 748297 |
| SIN3B     | 19p13. 11    | -0. 032923231 | 0. 661738 | 0. 748297 |
| RPL10     | Xq28         | 0. 032916954  | 0. 661798 | 0. 748323 |
| SIPA1L3   | 19q13. 13-   | -0. 0329044   | 0. 661919 | 0. 748418 |
| CYP11B1   | 8q24. 3      | 0. 032850494  | 0. 662439 | 0. 748923 |
| KCNK18    | 10q25. 3     | 0. 032850035  | 0. 662443 | 0. 748923 |
| NCF4      | 22q12. 3     | -0. 032845814 | 0. 662484 | 0. 748923 |
| WFDC11    | 20q13. 12    | 0. 032842461  | 0. 662516 | 0. 748923 |
| KRT28     | 17q21. 2     | 0. 032835799  | 0. 662581 | 0. 748954 |
| DCAKD     | 17q21. 31    | -0. 032785136 | 0. 663069 | 0. 749428 |
| SEPTIN14  | 7p11. 2      | 0. 032784481  | 0. 663076 | 0. 749428 |
| ACTR2     | 2p14         | -0. 032768397 | 0. 663231 | 0. 749562 |
| PSTPIP2   | 18q21. 1   t | -0. 032751658 | 0. 663392 | 0. 749702 |
| METTL6    | 3p25. 1      | 0. 032745381  | 0. 663453 | 0. 749728 |
| PIGF      | 2p21         | 0. 03271818   | 0. 663715 | 0. 749982 |
| NEUROD2   | 17q12        | -0. 032694825 | 0. 663941 | 0. 750194 |
| PLEKHA1   | 10q26. 13    | 0. 032678426  | 0. 664099 | 0. 750331 |
| FASN      | 17q25. 3     | -0. 032672149 | 0. 66416  | 0. 750357 |
| MIER1     | 1p31. 3      | -0. 032663779 | 0. 664241 | 0. 750386 |
| PEA15     | 1q23. 2      | 0. 032661687  | 0. 664261 | 0. 750386 |
| EMX2OS    | 10q26. 11    | 0. 03265746   | 0. 664302 | 0. 75039  |
| ZNF335    | 20q13. 12    | -0. 032644948 | 0. 664422 | 0. 750484 |
| KLK15     | 19q13. 33    | 0. 032595883  | 0. 664896 | 0. 750977 |
| NDC1      | 1p32. 3      | 0. 03258427   | 0. 665008 | 0. 751061 |
| ATP6VOA4  | 7q34         | -0. 032542526 | 0. 665412 | 0. 751474 |
| OR4E2     | 14q11. 2     | -0. 032506573 | 0. 665759 | 0. 751824 |
| ALG10     | 12p11. 1     | -0. 032500575 | 0. 665817 | 0. 751847 |
| LAP3      | 4p15. 32     | -0. 032490114 | 0. 665918 | 0. 751918 |
| RPP25L    | 9p13. 3      | 0. 032485929  | 0. 665959 | 0. 751922 |
| RNPC3     | 1p21. 1      | 0. 032467098  | 0. 666141 | 0. 752085 |
| LINC00523 | 14q32. 2     | -0. 032454824 | 0. 666259 | 0. 752176 |
| ACMSD     | 2q21. 3      | -0. 032450794 | 0. 666298 | 0. 752178 |
| GUSBP5    | 4q31. 21     | -0. 03243362  | 0. 666464 | 0. 752322 |
| FBXL13    | 7q22. 1      | 0. 032421066  | 0. 666586 | 0. 752417 |
| NLRP1     | 17p13. 2     | 0. 032416881  | 0. 666626 | 0. 75242  |
| DAB2IP    | 9q33. 2      | 0. 032410604  | 0. 666687 | 0. 752446 |
| PELO      | 5q11. 2      | 0. 03236248   | 0. 667152 | 0. 752929 |



|           |           |              |          |          |
|-----------|-----------|--------------|----------|----------|
| SLFN5     | 17q12     | -0.032339464 | 0.667375 | 0.753138 |
| FGF22     | 19p13.3   | 0.032321362  | 0.66755  | 0.753293 |
| PRSS57    | 19p13.3   | -0.032303263 | 0.667725 | 0.753407 |
| CHP2      | 16p12.2   | 0.03230309   | 0.667727 | 0.753407 |
| GOLGA6L5F | 15q25.2   | 0.032270416  | 0.668043 | 0.753701 |
| B9D2      | 19q13.2   | 0.032268324  | 0.668063 | 0.753701 |
| LINC00965 | 8p23.1    | -0.032218107 | 0.668549 | 0.754207 |
| CYP3A4    | 7q22.1    | 0.032211374  | 0.668614 | 0.754213 |
| LOC155060 | 7q36.1    | 0.032209738  | 0.66863  | 0.754213 |
| OR4X2     | 11p11.2   | -0.032190369 | 0.668818 | 0.754357 |
| MTAP      | 9p21.3    | 0.032188814  | 0.668833 | 0.754357 |
| SNORA46   | 16q21     | -0.032177844 | 0.668939 | 0.754434 |
| BAIAP2-D1 | 17q25.3   | -0.032155337 | 0.669157 | 0.754637 |
| ERLIN2    | 8p11.23   | -0.032144875 | 0.669258 | 0.754709 |
| CASP9     | 1p36.21   | -0.032132321 | 0.66938  | 0.754803 |
| NPHP3     | 3q22.1    | -0.032128136 | 0.66942  | 0.754806 |
| SUMO1P1   | 20q13.2   | 0.032117172  | 0.669526 | 0.754884 |
| UBE2H     | 7q32.2    | 0.032098843  | 0.669704 | 0.755039 |
| TRAPPC9   | 8q24.3    | -0.032094658 | 0.669744 | 0.755039 |
| RIPPLY1   | Xq22.3    | 0.032091221  | 0.669778 | 0.755039 |
| DUSP13    | 10q22.2   | -0.032084009 | 0.669848 | 0.755075 |
| ACAP3     | 1p36.33   | -0.032071642 | 0.669967 | 0.755168 |
| HSD17B10  | Xp11.22   | -0.032036072 | 0.670312 | 0.755498 |
| TAS2R4    | 7q34      | -0.032033606 | 0.670336 | 0.755498 |
| PARD3     | 10p11.22- | 0.03202561   | 0.670413 | 0.755543 |
| SNORA71D  | 20q11.23  | -0.032020688 | 0.670461 | 0.755554 |
| ART1      | 11p15.4   | -0.032015473 | 0.670512 | 0.755568 |
| NAV2      | 11p15.1   | -0.032010964 | 0.670555 | 0.755575 |
| TYRP1     | 9p23      | 0.032001088  | 0.670651 | 0.75564  |
| NDUFB2    | 7q34      | 0.031987948  | 0.670778 | 0.755741 |
| LOC286238 | 9q22.1    | -0.031983505 | 0.670821 | 0.755747 |
| ABCC6P2   | 16p13.11  | -0.031971209 | 0.670941 | 0.755796 |
| ZNF114    | 19q13.33  | -0.031971209 | 0.670941 | 0.755796 |
| STK32C    | 10q26.3   | 0.03195447   | 0.671103 | 0.755831 |
| ABCG8     | 2p21      | -0.031953948 | 0.671108 | 0.755831 |
| C11ORF45  | 11q24.3   | 0.031952378  | 0.671123 | 0.755831 |
| TBXA2R    | 19p13.3   | -0.031952378 | 0.671123 | 0.755831 |
| UBE2Q2    | 15q24.2   | -0.031937731 | 0.671265 | 0.755949 |
| SPDYE4    | 17p13.1   | -0.031925226 | 0.671386 | 0.756007 |
| OR1D4     | 17p13.3   | -0.031924593 | 0.671392 | 0.756007 |
| SNORA70B  | 2p15      | -0.031912222 | 0.671512 | 0.756099 |
| HDGFL1    | 6p22.3    | 0.031904552  | 0.671587 | 0.75614  |
| FAM221A   | 7p15.3    | 0.031872868  | 0.671894 | 0.756444 |
| RPS15A    | 16p12.3   | 0.031864499  | 0.671975 | 0.756492 |
| RAET1K    | 6q25.1    | 0.031854618  | 0.672071 | 0.756558 |
| SPANXN3   | Xq27.3    | 0.03181248   | 0.67248  | 0.756975 |
| MAGEB3    | Xp21.2    | 0.031786714  | 0.67273  | 0.757214 |
| SLC25A13  | 7q21.3    | 0.031766158  | 0.672929 | 0.757396 |
| HCCAT5    | 16q22.3   | -0.03175621  | 0.673026 | 0.757462 |
| SNORA80E  | 1q22      | 0.031751852  | 0.673068 | 0.757467 |
| MIA2      | 14q21.1   | 0.031720126  | 0.673376 | 0.757771 |
| SERPINA3  | 14q32.13  | 0.031709665  | 0.673477 | 0.757842 |
| HIST1H2AF | 6p22.1    | -0.031696238 | 0.673608 | 0.757946 |
| OR11H12   | 14q11.2   | -0.031687141 | 0.673696 | 0.758003 |

|           |          |              |          |          |
|-----------|----------|--------------|----------|----------|
| FBXL15    | 10q24.32 | 0.031663633  | 0.673924 | 0.758217 |
| FOXD4L3   | 9q21.11  | 0.031642818  | 0.674126 | 0.758383 |
| OBSL1     | 2q35     | 0.031640617  | 0.674148 | 0.758383 |
| LZTR1     | 22q11.21 | -0.031602954 | 0.674514 | 0.758752 |
| FRMPD2B   | 10q11.22 | 0.031584189  | 0.674696 | 0.758914 |
| DDAH1     | 1p22.3   | 0.031575754  | 0.674778 | 0.758964 |
| MRPS11    | 15q25.3  | 0.031571569  | 0.674818 | 0.758967 |
| NSRP1     | 17q11.2  | 0.031552738  | 0.675001 | 0.75913  |
| RILPL2    | 12q24.31 | 0.031542276  | 0.675103 | 0.759201 |
| BDKRB1    | 14q32.2  | -0.031538091 | 0.675144 | 0.759204 |
| GSTZ1     | 14q24.3  | 0.031525537  | 0.675266 | 0.759299 |
| TRAPPC3L  | 6q22.1   | -0.031515437 | 0.675364 | 0.759366 |
| ELMOD3    | 2p11.2   | 0.03149206   | 0.675591 | 0.759579 |
| FLJ30679  | 16q24.1  | -0.031487282 | 0.675637 | 0.759589 |
| NPFRR2    | 4q13.3   | -0.031441901 | 0.676079 | 0.760042 |
| HTR6      | 1p36.13  | 0.031431843  | 0.676176 | 0.760109 |
| TRIM74    | 7q11.23  | 0.031406475  | 0.676423 | 0.760343 |
| KLC1      | 14q32.33 | 0.031397903  | 0.676506 | 0.760394 |
| REG1B     | 2p12     | -0.031389722 | 0.676586 | 0.760441 |
| AZGP1     | 7q22.1   | 0.031379072  | 0.676689 | 0.760515 |
| BMX       | Xp22.2   | -0.031351872 | 0.676954 | 0.760769 |
| IDNK      | 9q21.32  | 0.031328856  | 0.677178 | 0.760978 |
| OR3A4P    | 17p13.3  | -0.031315774 | 0.677305 | 0.761078 |
| SF3B3     | 16q22.1  | -0.031307932 | 0.677381 | 0.761121 |
| ELMSAN1   | 14q24.3  | 0.031295378  | 0.677504 | 0.761176 |
| SPG11     | 15q21.1  | 0.031293286  | 0.677524 | 0.761176 |
| TRAF6     | 11p12    | -0.031291193 | 0.677544 | 0.761176 |
| TSACC     | 1q22     | -0.031268973 | 0.67776  | 0.761376 |
| NFKBIZ    | 3q12.3   | 0.031255623  | 0.67789  | 0.761479 |
| COL8A1    | 3q12.1   | -0.031251438 | 0.677931 | 0.761482 |
| LRRC37A2  | 17q21.31 | 0.031238884  | 0.678053 | 0.761576 |
| LINC00189 | 21q21.3  | 0.031224453  | 0.678194 | 0.761691 |
| YBX3P1    | 16p11.2  | 0.031215868  | 0.678277 | 0.761742 |
| ARID5A    | 2q11.2   | -0.031186575 | 0.678562 | 0.76202  |
| TMPRSS13  | 11q23.3  | -0.03115519  | 0.678868 | 0.76232  |
| DSC3      | 18q12.1  | 0.031130147  | 0.679112 | 0.762551 |
| KLF1      | 19p13.13 | -0.031115834 | 0.679251 | 0.762665 |
| FOXR1     | 11q23.3  | 0.031090561  | 0.679497 | 0.762881 |
| MLXIPL    | 7q11.23  | -0.031088235 | 0.67952  | 0.762881 |
| FOXR2     | Xp11.21  | 0.031075757  | 0.679642 | 0.762974 |
| EHF       | 11p13    | -0.031052665 | 0.679867 | 0.763184 |
| CLDN16    | 3q28     | 0.03104688   | 0.679923 | 0.763204 |
| FAF2      | 5q35.2   | -0.031038018 | 0.680009 | 0.763259 |
| ZNF767P   | 7q36.1   | -0.031010817 | 0.680274 | 0.763513 |
| METTL22   | 16p13.2  | 0.031006649  | 0.680315 | 0.763516 |
| RSPH1     | 21q22.3  | 0.030987802  | 0.680499 | 0.76365  |
| NEK11     | 3q22.1   | 0.030983617  | 0.680539 | 0.76365  |
| NSMCE4A   | 10q26.13 | 0.030982587  | 0.680549 | 0.76365  |
| LINC01124 | 2q31.1   | 0.030971063  | 0.680662 | 0.763685 |
| DUBR      | 3q13.12  | -0.030964786 | 0.680723 | 0.763685 |
| GCSAM     | 3q13.2   | 0.030962709  | 0.680743 | 0.763685 |
| MLLT3     | 9p21.3   | -0.030958509 | 0.680784 | 0.763685 |
| SLC27A3   | 1q21.3   | -0.030954324 | 0.680825 | 0.763685 |
| NAXD      | 13q34    | 0.030952231  | 0.680845 | 0.763685 |

|           |           |              |          |          |
|-----------|-----------|--------------|----------|----------|
| MAP2K1    | 15q22.31  | -0.030950139 | 0.680866 | 0.763685 |
| FAM43B    | 1p36.12   | 0.030948047  | 0.680886 | 0.763685 |
| PLET1     | 11q23.1   | -0.030919941 | 0.68116  | 0.76395  |
| PRR4      | 12p13.2   | 0.030908292  | 0.681274 | 0.764034 |
| RMND1     | 6q25.1    | -0.030899923 | 0.681355 | 0.764083 |
| XRCC6     | 22q13.2   | 0.030893646  | 0.681416 | 0.764088 |
| EVI5      | 1p22.1    | -0.030891553 | 0.681437 | 0.764088 |
| SLC25A16  | 10q21.3   | -0.030862276 | 0.681722 | 0.764366 |
| CLIP2     | 7q11.23   | 0.030853891  | 0.681804 | 0.764415 |
| SRRM1     | 1p36.11   | 0.03082669   | 0.682069 | 0.764669 |
| P2RY4     | Xq13.1    | 0.030814932  | 0.682184 | 0.764755 |
| CSNK1D    | 17q25.3   | -0.030801582 | 0.682314 | 0.764847 |
| REXO1L1P  | 8q21.2    | -0.030798673 | 0.682343 | 0.764847 |
| LOC145474 | 14q24.2   | 0.030784044  | 0.682485 | 0.764964 |
| JRK       | 8q24.3    | -0.030772289 | 0.6826   | 0.765049 |
| RAB40A    | Xq22.2    | 0.030759735  | 0.682723 | 0.765144 |
| ELL       | 19p13.11  | -0.030728349 | 0.683029 | 0.765444 |
| C1QB      | 1p36.12   | -0.030724165 | 0.68307  | 0.765447 |
| CLCA2     | 1p22.3    | -0.030719644 | 0.683114 | 0.765453 |
| IGFBP4    | 17q21.2   | -0.030715795 | 0.683151 | 0.765453 |
| ALPK2     | 18q21.31- | 0.03071161   | 0.683192 | 0.765456 |
| FNBP1L    | 1p22.1    | -0.03068441  | 0.683458 | 0.765667 |
| GGCX      | 2p11.2    | -0.03068441  | 0.683458 | 0.765667 |
| FAM138F   | 19p13.3   | 0.030674771  | 0.683552 | 0.765709 |
| OR10G9    | 11q24.2   | -0.030672705 | 0.683572 | 0.765709 |
| SGO2      | 2q33.1    | 0.030617454  | 0.684111 | 0.766271 |
| HES6      | 2q37.3    | -0.030602808 | 0.684254 | 0.766388 |
| MTUS1     | 8p22      | -0.030586069 | 0.684418 | 0.766528 |
| OR56A5    | 11p15.4   | -0.030553913 | 0.684732 | 0.766827 |
| SLC26A3   | 7q22.3-q2 | -0.030550886 | 0.684762 | 0.766827 |
| ATP5MPL   | 14q32.33  | 0.030531668  | 0.684949 | 0.766931 |
| AIM2      | 1q23.1-q2 | -0.030530781 | 0.684958 | 0.766931 |
| ZNF273    | 7q11.21   | 0.030529575  | 0.68497  | 0.766931 |
| PANX2     | 22q13.33  | 0.030521206  | 0.685051 | 0.76698  |
| RPN2      | 20q11.23  | -0.030510744 | 0.685154 | 0.767051 |
| GAGE10    | Xp11.23   | -0.030470612 | 0.685546 | 0.767446 |
| TOB2      | 22q13.2   | -0.030466805 | 0.685583 | 0.767446 |
| ERMN      | 2q24.1    | 0.030435419  | 0.68589  | 0.767746 |
| TCEA2     | 20q13.33  | 0.030406126  | 0.686176 | 0.768024 |
| PAWR      | 12q21.2   | 0.030387295  | 0.68636  | 0.768187 |
| DRD2      | 11q23.2   | -0.030379988 | 0.686432 | 0.768224 |
| MOS       | 8q12.1    | -0.030340084 | 0.686822 | 0.768618 |
| TAS2R38   | 7q34      | 0.030329662  | 0.686924 | 0.768689 |
| C11ORF94  | 11p11.2   | 0.03031866   | 0.687031 | 0.768766 |
| ABCC6P1   | 16p12.3   | 0.030307025  | 0.687145 | 0.76885  |
| MESD      | 15q25.1   | 0.030301509  | 0.687199 | 0.768868 |
| NINJ1     | 9q22.31   | -0.030295232 | 0.687261 | 0.768893 |
| GOLGA6D   | 15q24.2   | -0.030290764 | 0.687304 | 0.768899 |
| PLEKH01   | 1q21.2    | -0.030253384 | 0.68767  | 0.769265 |
| DENND2C   | 1p13.2    | -0.030247107 | 0.687731 | 0.769291 |
| IFT46     | 11q23.3   | -0.030226184 | 0.687936 | 0.769477 |
| BIRC2     | 11q22.2   | 0.030217814  | 0.688018 | 0.769525 |
| RPS17     | 15q25.2   | 0.030203168  | 0.688161 | 0.769643 |
| TMEM163   | 2q21.3    | -0.030194798 | 0.688243 | 0.769691 |

|            |           |              |          |          |
|------------|-----------|--------------|----------|----------|
| GSG1       | 12p13.1   | -0.030176209 | 0.688425 | 0.769851 |
| MICOS10    | 1p36.13   | 0.030138305  | 0.688796 | 0.77018  |
| MSRB1      | 16p13.3   | -0.030138305 | 0.688796 | 0.77018  |
| LDHC       | 11p15.1   | -0.030126397 | 0.688913 | 0.770232 |
| C10RF185   | 1p32.3    | -0.030125666 | 0.68892  | 0.770232 |
| IL15       | 4q31.21   | 0.030092273  | 0.689247 | 0.770512 |
| VPS37D     | 7q11.23   | -0.030092273 | 0.689247 | 0.770512 |
| YIPF3      | 6p21.1    | 0.030067165  | 0.689493 | 0.770744 |
| CDC23      | 5q31.2    | -0.030044149 | 0.689718 | 0.770952 |
| TWF1       | 12q12     | -0.030039964 | 0.689759 | 0.770955 |
| PAPLN      | 14q24.2   | -0.030035779 | 0.6898   | 0.770958 |
| KRTAP8-1   | 21q22.11  | 0.030024571  | 0.68991  | 0.771037 |
| NVL        | 1q42.11   | 0.030016948  | 0.689985 | 0.771078 |
| POTEH      | 22q11.1   | -0.030004419 | 0.690107 | 0.771172 |
| CLVS1      | 8q12.2-q1 | -0.029985066 | 0.690297 | 0.771341 |
| ZNHIT6     | 1p22.3    | -0.029973009 | 0.690415 | 0.771429 |
| PRDM12     | 9q34.12   | 0.029954412  | 0.690597 | 0.771572 |
| MRC2       | 17q23.2   | 0.029952085  | 0.69062  | 0.771572 |
| CD46       | 1q32.2    | 0.029943716  | 0.690702 | 0.771621 |
| VCAM1      | 1p21.2    | 0.029933254  | 0.690805 | 0.77166  |
| ADAM7      | 8p21.2    | 0.029928444  | 0.690852 | 0.77166  |
| MYCN       | 2p24.3    | -0.029922792 | 0.690907 | 0.77166  |
| KIAA1755   | 20q11.23  | -0.0299207   | 0.690928 | 0.77166  |
| TPR        | 1q31.1    | 0.029918607  | 0.690948 | 0.77166  |
| FHDC1      | 4q31.3    | -0.029916515 | 0.690969 | 0.77166  |
| SIMC1      | 5q35.2    | 0.02991233   | 0.69101  | 0.771662 |
| EFCAB3     | 17q23.2   | -0.02987675  | 0.691359 | 0.772009 |
| CDPF1      | 22q13.31  | 0.029845375  | 0.691666 | 0.772289 |
| MYH11      | 16p13.11  | 0.029843282  | 0.691687 | 0.772289 |
| SKIL       | 3q26.2    | -0.029837005 | 0.691748 | 0.772314 |
| S100G      | Xp22.2    | -0.0298122   | 0.691992 | 0.772543 |
| NDUFA8     | 9q33.2    | -0.029807712 | 0.692036 | 0.772549 |
| SOCS3      | 17q25.3   | -0.029793066 | 0.692179 | 0.772666 |
| PROK1      | 1p13.3    | -0.029786957 | 0.692239 | 0.77267  |
| HECW1      | 7p14.1-p1 | -0.029784852 | 0.69226  | 0.77267  |
| CERS5      | 12q13.12  | 0.029759588  | 0.692508 | 0.772903 |
| FGF6       | 12p13.32  | -0.029735351 | 0.692745 | 0.773102 |
| ZFP91-CN1  | 11q12.1   | -0.029726722 | 0.69283  | 0.773102 |
| LINC010116 | p25.2     | -0.029724018 | 0.692857 | 0.773102 |
| PPP4R3C    | Xp21.3    | 0.029723284  | 0.692864 | 0.773102 |
| H2BFM      | Xq22.2    | -0.029720797 | 0.692888 | 0.773102 |
| GLRX5      | 14q32.13  | 0.029717741  | 0.692918 | 0.773102 |
| PSMB6      | 17p13.2   | -0.029703095 | 0.693062 | 0.773219 |
| APOA2      | 1q23.3    | 0.029679228  | 0.693296 | 0.773414 |
| ANKRD20A3  | 9q21.11   | -0.029675894 | 0.693329 | 0.773414 |
| SNORA51    | 20p13     | 0.029673521  | 0.693352 | 0.773414 |
| EPHA10     | 1p34.3    | 0.029640324  | 0.693678 | 0.773734 |
| PGF        | 14q24.3   | -0.02962777  | 0.693801 | 0.773828 |
| ARMCX6     | Xq22.1    | 0.0296194    | 0.693883 | 0.773877 |
| HIST1H3E   | 6p22.2    | 0.029608939  | 0.693986 | 0.773905 |
| PILRB      | 7q22.1    | 0.029608939  | 0.693986 | 0.773905 |
| CLSPN      | 1p34.3    | 0.029600569  | 0.694068 | 0.773953 |
| ACSL3      | 2q36.1    | 0.029588015  | 0.694191 | 0.774048 |
| GTF2H2     | 5q13.2    | -0.029569184 | 0.694376 | 0.77417  |

|           |           |              |          |          |
|-----------|-----------|--------------|----------|----------|
| LPO       | 17q22     | 0.029567592  | 0.694392 | 0.77417  |
| SHANK2    | 11q13.3-c | -0.029564999 | 0.694417 | 0.77417  |
| GATA1     | Xp11.23   | -0.029555981 | 0.694506 | 0.774226 |
| SNORA36A  | Xq28      | -0.029550725 | 0.694558 | 0.77424  |
| METTL21C  | 13q33.1   | -0.029543645 | 0.694627 | 0.774274 |
| PHPT1     | 9q34.3    | -0.029525244 | 0.694808 | 0.774432 |
| FXR1      | 3q26.33   | -0.029495951 | 0.695095 | 0.77471  |
| TFPI2     | 7q21.3    | -0.029454104 | 0.695507 | 0.775125 |
| MRPS2     | 9q34.3    | -0.029447827 | 0.695568 | 0.77515  |
| CLCN7     | 16p13.3   | 0.029426904  | 0.695774 | 0.775336 |
| KPNB1     | 17q21.32  | -0.029412257 | 0.695918 | 0.775453 |
| COL6A5    | 3q22.1    | -0.029388188 | 0.696154 | 0.775674 |
| BARHL1    | 9q34.13   | 0.029375959  | 0.696275 | 0.775764 |
| DLK1      | 14q32.2   | -0.02936876  | 0.696345 | 0.7758   |
| CLEC2A    | 12p13.31  | -0.029345789 | 0.696571 | 0.776008 |
| PTGES3    | 12q13.3 1 | 0.029341117  | 0.696617 | 0.776016 |
| MALAT1    | 11q13.1   | 0.029336932  | 0.696658 | 0.776019 |
| LOC100190 | 16p12.2   | 0.029322286  | 0.696802 | 0.776116 |
| STPG1     | 1p36.11   | 0.029320193  | 0.696823 | 0.776116 |
| RPL21P44  | 4q12      | -0.029296403 | 0.697057 | 0.77633  |
| EEF1B2    | 2q33.3    | 0.0292909    | 0.697111 | 0.77633  |
| PTGFRN    | 1p13.1    | 0.029288808  | 0.697131 | 0.77633  |
| LINC00303 | 1q32.1    | -0.029282649 | 0.697192 | 0.776354 |
| LINC02593 | 1p36.33   | 0.029267238  | 0.697343 | 0.776479 |
| NEUROG3   | 10q22.1   | 0.029251087  | 0.697502 | 0.776601 |
| ACTRT2    | 1p36.32   | -0.029248214 | 0.697531 | 0.776601 |
| ASB3      | 2p16.2    | -0.029200929 | 0.697996 | 0.777076 |
| POTEE     | 2q21.1    | 0.029184511  | 0.698157 | 0.777195 |
| DGCR9     | 22q11.21  | -0.029182098 | 0.698181 | 0.777195 |
| OR51I1    | 11p15.4   | -0.02917674  | 0.698234 | 0.777211 |
| RPS4Y2    | Yq11.223  | 0.029152685  | 0.69847  | 0.777388 |
| C100RF90  | 10q26.2   | -0.029152639 | 0.698471 | 0.777388 |
| CHST14    | 15q15.1   | 0.029117235  | 0.698819 | 0.777733 |
| MYOZ3     | 5q33.1    | 0.029073295  | 0.699252 | 0.778171 |
| LGALS2    | 22q13.1   | -0.029067018 | 0.699313 | 0.778196 |
| EIF3IP1   | 7q31.1    | -0.029050207 | 0.699479 | 0.778337 |
| ANKRD13B  | 17q11.2   | 0.029035633  | 0.699622 | 0.77841  |
| B3GALNT1  | 3q26.1    | -0.029035633 | 0.699622 | 0.77841  |
| OR13C9    | 9q31.1    | -0.029011111 | 0.699864 | 0.778512 |
| SNORA19   | 10q26.11  | 0.029011111  | 0.699864 | 0.778512 |
| SNORA36C  | 2p13.3    | 0.029011111  | 0.699864 | 0.778512 |
| DUS3L     | 19p13.3   | 0.029010525  | 0.69987  | 0.778512 |
| OR5T2     | 11q12.1   | 0.028972482  | 0.700244 | 0.778885 |
| TCF7      | 5q31.1    | -0.028966585 | 0.700302 | 0.778906 |
| DNAJB7    | 22q13.2   | -0.028956349 | 0.700403 | 0.778975 |
| C11ORF96  | 11p11.2   | -0.028949846 | 0.700467 | 0.779003 |
| CSAG1     | Xq28      | 0.028938937  | 0.700575 | 0.779079 |
| SLC7A5    | 16q24.2   | -0.028933107 | 0.700632 | 0.7791   |
| PRKCA     | 17q24.2   | 0.028903814  | 0.700921 | 0.779334 |
| TSSK6     | 19p13.11  | 0.028903814  | 0.700921 | 0.779334 |
| LTB4R     | 14q12     | 0.028897537  | 0.700983 | 0.779359 |
| C50RF38   | 5p15.33   | -0.028893355 | 0.701024 | 0.779362 |
| PN01      | 2p14      | -0.02886406  | 0.701313 | 0.779639 |
| BAAT      | 9q31.1    | 0.028857783  | 0.701374 | 0.779665 |

|            |           |              |          |          |
|------------|-----------|--------------|----------|----------|
| IGBP1P1    | 14q13.2   | -0.028852703 | 0.701424 | 0.779677 |
| C1ORF100   | 1q44      | -0.028827594 | 0.701672 | 0.779909 |
| DIAPH2     | Xq21.33   | 0.028811751  | 0.701828 | 0.780018 |
| NCKAP1     | 2q32.1    | 0.028809658  | 0.701849 | 0.780018 |
| PHF14      | 7p21.3    | 0.028799197  | 0.701952 | 0.78009  |
| SEL1L3     | 4p15.2    | -0.028795012 | 0.701993 | 0.780092 |
| KRTAP5-AS1 | 11p15.5   | -0.028786703 | 0.702075 | 0.78014  |
| CEACAM3    | 19q13.2   | 0.028756845  | 0.702369 | 0.780423 |
| GBA3       | 4p15.2    | -0.028752269 | 0.702415 | 0.78043  |
| CHCHD4     | 3p25.1    | -0.028742703 | 0.702509 | 0.780492 |
| PCBD1      | 10q22.1   | 0.028738518  | 0.70255  | 0.780494 |
| C4ORF17    | 4q23      | 0.028712464  | 0.702807 | 0.780736 |
| PTCHD3     | 10p12.1   | 0.028704512  | 0.702885 | 0.780745 |
| ZP1        | 11q12.2   | 0.028703774  | 0.702893 | 0.780745 |
| HAX1       | 1q21.3    | -0.028686209 | 0.703066 | 0.780894 |
| GOLGA6L1   | 15q11.2   | -0.028676915 | 0.703158 | 0.780921 |
| LRMDA      | 10q22.2-c | -0.028675747 | 0.703169 | 0.780921 |
| CRISP2     | 6p12.3    | -0.028653713 | 0.703387 | 0.781119 |
| VPS11      | 11q23.3   | -0.02864227  | 0.703499 | 0.78116  |
| LAMB2P1    | 3p21.31   | 0.028638085  | 0.703541 | 0.78116  |
| NPLOC4     | 17q25.3   | -0.028638085 | 0.703541 | 0.78116  |
| OR56A4     | 11p15.4   | -0.028627708 | 0.703643 | 0.781231 |
| SERPINE1   | 7q22.1    | -0.028610884 | 0.703809 | 0.781372 |
| PCYOX1L    | 5q32      | 0.028587869  | 0.704036 | 0.78158  |
| MTCH2      | 11p11.2   | 0.028575314  | 0.70416  | 0.781674 |
| OR10J1     | 1q23.2    | -0.028569924 | 0.704213 | 0.781679 |
| MAPK6      | 15q21.2   | -0.028566945 | 0.704243 | 0.781679 |
| DPM3       | 1q22      | 0.028533467  | 0.704573 | 0.782003 |
| NKX6-3     | 8p11.21   | 0.028514022  | 0.704765 | 0.782172 |
| PRR23B     | 3q23      | 0.028507357  | 0.704831 | 0.782202 |
| EIF3J      | 15q21.1   | 0.028502082  | 0.704883 | 0.782216 |
| ARRDC5     | 19p13.3   | -0.028489018 | 0.705012 | 0.782316 |
| STK32A     | 5q32      | 0.028428998  | 0.705605 | 0.78293  |
| MBL1P      | 10q22.3   | 0.028423633  | 0.705658 | 0.782945 |
| TEX44      | 2q37.1    | -0.028407667 | 0.705815 | 0.783077 |
| GPCPD1     | 20p12.3   | -0.028389095 | 0.705999 | 0.783237 |
| NPM1       | 5q35.1    | 0.028382818  | 0.706061 | 0.783262 |
| KRTAP1-1   | 17q21.2   | -0.028370543 | 0.706182 | 0.783295 |
| IGFALS     | 16p13.3   | -0.028365047 | 0.706236 | 0.783295 |
| ALG6       | 1p31.3    | -0.028363986 | 0.706247 | 0.783295 |
| SNORD1C    | 17q25.1   | 0.028363986  | 0.706247 | 0.783295 |
| KDM4B      | 19p13.3   | 0.028355617  | 0.706329 | 0.783343 |
| CLEC2D     | 12p13.31  | -0.02834934  | 0.706391 | 0.783368 |
| BMS1P20    | 22q11.22  | -0.028345155 | 0.706433 | 0.783371 |
| ODF1       | 8q22.3    | 0.02833756   | 0.706508 | 0.783398 |
| PUM3       | 9p24.2    | 0.028334693  | 0.706536 | 0.783398 |
| OR5K1      | 3q11.2    | -0.028302567 | 0.706854 | 0.783707 |
| CPS1-IT1   | 2q34      | -0.028292052 | 0.706958 | 0.783779 |
| BSPRY      | 9q32      | 0.028259369  | 0.707281 | 0.784093 |
| LRRC56     | 11p15.5   | 0.028253091  | 0.707343 | 0.784119 |
| PTPN6      | 12p13.31  | -0.028238445 | 0.707487 | 0.784236 |
| ZBTB12     | 6p21.33   | 0.028230076  | 0.70757  | 0.784284 |
| FNDC1      | 6q25.3    | -0.028221706 | 0.707653 | 0.784332 |
| TNFRSF11E  | 8q24.12   | 0.028211244  | 0.707756 | 0.784403 |

|                 |           |              |          |          |
|-----------------|-----------|--------------|----------|----------|
| DCTN1           | 2p13.1    | 0.02819869   | 0.70788  | 0.784488 |
| CLEC4M          | 19p13.2   | -0.028195518 | 0.707912 | 0.784488 |
| DDB1            | 11q12.2   | -0.028167305 | 0.708191 | 0.784754 |
| GLA             | Xq22.1    | -0.028135919 | 0.708501 | 0.785055 |
| HSPA4           | 5q31.1    | -0.028117088 | 0.708687 | 0.785217 |
| HSPA2           | 14q23.3   | -0.028098257 | 0.708874 | 0.78538  |
| CCL15-CCI17q12  |           | -0.028093105 | 0.708925 | 0.785393 |
| KAT8            | 16p11.2   | 0.028079426  | 0.70906  | 0.785481 |
| SCARNA2         | 1p13.3    | 0.02807421   | 0.709112 | 0.785481 |
| CCND3           | 6p21.1    | 0.028073149  | 0.709122 | 0.785481 |
| RAB15           | 14q23.3   | 0.028064779  | 0.709205 | 0.785529 |
| MT1G            | 16q13     | -0.028045948 | 0.709391 | 0.785692 |
| ANAPC4          | 4p15.2    | 0.028029209  | 0.709557 | 0.785832 |
| HOXD3           | 2q31.1    | -0.028018748 | 0.70966  | 0.785903 |
| IMPA2           | 18p11.21  | 0.028014563  | 0.709702 | 0.785906 |
| ADRA2B          | 2q11.2    | 0.028010393  | 0.709743 | 0.785908 |
| ATXN3           | 14q32.12  | -0.027999916 | 0.709847 | 0.785979 |
| NPTN            | 15q24.1   | -0.027993639 | 0.709909 | 0.786004 |
| PTPRE           | 10q26.2   | 0.027983177  | 0.710012 | 0.786075 |
| IFT140          | 16p13.3   | 0.027978993  | 0.710054 | 0.786078 |
| GPN2            | 1p36.11   | 0.027966439  | 0.710178 | 0.786172 |
| TMEFF2          | 2q32.3    | -0.027960487 | 0.710237 | 0.786193 |
| ILF3            | 19p13.2   | -0.027955977 | 0.710282 | 0.786199 |
| PMAIP1          | 18q21.32  | 0.027939238  | 0.710447 | 0.786339 |
| SCGB1A1         | 11q12.3   | 0.027911845  | 0.710719 | 0.786596 |
| LINC015874p16.2 |           | 0.027883389  | 0.711    | 0.786864 |
| MUC13           | 3q21.2    | 0.027845082  | 0.71138  | 0.78724  |
| LCE5A           | 1q21.3    | -0.027833772 | 0.711492 | 0.787313 |
| C8G             | 9q34.3    | 0.027830494  | 0.711524 | 0.787313 |
| HMGXB3          | 5q32      | 0.027819974  | 0.711628 | 0.787364 |
| TXN2            | 22q12.3   | 0.027817881  | 0.711649 | 0.787364 |
| C10RF68         | 1q21.3    | -0.027772939 | 0.712094 | 0.787813 |
| MTBP            | 8q24.12   | 0.027677693  | 0.713038 | 0.78877  |
| NLN             | 5q12.3    | 0.027677693  | 0.713038 | 0.78877  |
| APOBEC3G        | 22q13.1   | -0.027642123 | 0.713391 | 0.789117 |
| EMC10           | 19q13.33  | -0.027637939 | 0.713433 | 0.789119 |
| HMX3            | 10q26.13  | 0.027628608  | 0.713525 | 0.789177 |
| CD300A          | 17q25.1   | -0.027596091 | 0.713847 | 0.78947  |
| ELFN2           | 22q13.1   | 0.027593999  | 0.713868 | 0.78947  |
| MINDY2          | 15q21.3-c | -0.027589814 | 0.71391  | 0.789472 |
| SMURF2          | 17q23.3-c | -0.027575168 | 0.714055 | 0.789568 |
| LCK             | 1p35.2    | -0.027573076 | 0.714076 | 0.789568 |
| TMEM254         | 10q22.3   | 0.027547967  | 0.714325 | 0.7898   |
| TMEM26          | 10q21.2   | -0.02754169  | 0.714387 | 0.789825 |
| HTR3D           | 3q27.1    | -0.027537206 | 0.714431 | 0.78983  |
| JSRP1           | 19p13.3   | 0.027527044  | 0.714532 | 0.789859 |
| KTN1            | 14q22.3   | 0.027522859  | 0.714574 | 0.789859 |
| TBX10           | 11q13.2   | 0.027522635  | 0.714576 | 0.789859 |
| SEC61A1         | 3q21.3    | 0.027510305  | 0.714698 | 0.789951 |
| PRORP           | 14q13.2   | 0.027499843  | 0.714802 | 0.790022 |
| NT5C1B          | 2p24.2    | 0.027460445  | 0.715193 | 0.79041  |
| PTPN9           | 15q24.2   | 0.027449627  | 0.7153   | 0.790485 |
| MCM6            | 2q21.3    | 0.027445442  | 0.715342 | 0.790487 |
| HIST1H2AA6p22.2 |           | 0.027436314  | 0.715433 | 0.790543 |

|           |            |               |           |           |
|-----------|------------|---------------|-----------|-----------|
| ZNF845    | 19q13. 42  | -0. 027424518 | 0. 71555  | 0. 790629 |
| PKDREJ    | 22q13. 31  | -0. 027383732 | 0. 715954 | 0. 791033 |
| TYRO3     | 15q15. 1   | 0. 02735547   | 0. 716235 | 0. 791299 |
| ERI3      | 1p34. 1    | -0. 027342916 | 0. 71636  | 0. 791393 |
| RDH16     | 12q13. 3   | 0. 027330362  | 0. 716484 | 0. 791487 |
| FLNA      | Xq28       | 0. 027301069  | 0. 716775 | 0. 791764 |
| DDX23     | 12q13. 12  | 0. 0272927    | 0. 716858 | 0. 791812 |
| CSH2      | 17q23. 3   | -0. 027286892 | 0. 716916 | 0. 791832 |
| WDR25     | 14q32. 2   | 0. 027277021  | 0. 717014 | 0. 791897 |
| TMEM109   | 11q12. 2   | 0. 027246668  | 0. 717315 | 0. 792186 |
| ZNF277    | 7q31. 1    | -0. 027223652 | 0. 717544 | 0. 792395 |
| TEX36     | 10q26. 13  | -0. 027202643 | 0. 717753 | 0. 792582 |
| G6PC      | 17q21. 31  | -0. 027191566 | 0. 717863 | 0. 792631 |
| CYP21A2   | 6p21. 33   | -0. 027190174 | 0. 717877 | 0. 792631 |
| SNORA71B  | 20q11. 23  | -0. 027185833 | 0. 71792  | 0. 792635 |
| KIAA1210  | Xq24       | 0. 027176695  | 0. 718011 | 0. 792691 |
| CCDC83    | 11q14. 1-c | -0. 027169477 | 0. 718082 | 0. 792726 |
| SIKE1     | 1p13. 2    | -0. 027160881 | 0. 718168 | 0. 792777 |
| OR4F21    | 8p23. 3    | -0. 027152421 | 0. 718252 | 0. 792826 |
| ACKR3     | 2q37. 3    | 0. 027139958  | 0. 718376 | 0. 792919 |
| PHOSPHO1  | 17q21. 32  | -0. 027132663 | 0. 718448 | 0. 792955 |
| BPHL      | 6p25. 2    | -0. 027127404 | 0. 7185   | 0. 792969 |
| IFNG      | 12q15      | -0. 027103279 | 0. 71874  | 0. 79319  |
| ARMC3     | 10p12. 2   | -0. 027096514 | 0. 718808 | 0. 79322  |
| LINC00626 | 1q24. 2    | -0. 027088348 | 0. 718889 | 0. 793266 |
| MYADM     | 19q13. 42  | 0. 027047894  | 0. 719291 | 0. 793666 |
| OR5L2     | 11q12. 1   | -0. 027030256 | 0. 719466 | 0. 793816 |
| FAM177B   | 1q41       | -0. 027003955 | 0. 719728 | 0. 79406  |
| ILF2      | 1q21. 3    | -0. 0269914   | 0. 719853 | 0. 794154 |
| IFFO2     | 1p36. 13   | -0. 026909799 | 0. 720664 | 0. 795006 |
| ZC3H11A   | 1q32. 1    | 0. 026840751  | 0. 721351 | 0. 79572  |
| ZNF815P   | 7p22. 1    | 0. 026834474  | 0. 721414 | 0. 79572  |
| PRG1      | 19q13. 31  | -0. 02683273  | 0. 721431 | 0. 79572  |
| HPSE      | 4q21. 23   | 0. 026811458  | 0. 721643 | 0. 79591  |
| LMO1      | 11p15. 4   | -0. 026803974 | 0. 721717 | 0. 795914 |
| ZNF648    | 1q25. 3    | -0. 02680311  | 0. 721726 | 0. 795914 |
| CYTH3     | 7p22. 1    | -0. 026798904 | 0. 721768 | 0. 795916 |
| LINC00906 | 19q12      | -0. 026794719 | 0. 72181  | 0. 795918 |
| FAM181A   | 14q32. 12  | 0. 026778304  | 0. 721973 | 0. 796014 |
| DFFA      | 1p36. 22   | -0. 02677798  | 0. 721976 | 0. 796014 |
| ADCY10P1  | 6p21. 1    | -0. 026758117 | 0. 722174 | 0. 796188 |
| AGPS      | 2q31. 2    | 0. 026740318  | 0. 722351 | 0. 796339 |
| C4ORF3    | 4q26       | -0. 026736133 | 0. 722393 | 0. 796341 |
| OR2B11    | 1q44       | -0. 026719432 | 0. 722559 | 0. 796481 |
| SETDB1    | 1q21. 3    | 0. 026715209  | 0. 722601 | 0. 796483 |
| ZNF564    | 19p13. 2   | -0. 026711025 | 0. 722643 | 0. 796485 |
| SNRPF     | 12q23. 1   | 0. 026702655  | 0. 722726 | 0. 796533 |
| GTF2A2    | 15q22. 2   | 0. 026677547  | 0. 722976 | 0. 796765 |
| PDGFRB    | 5q32       | -0. 026669177 | 0. 72306  | 0. 796792 |
| DBF4      | 7q21. 12   | -0. 026667085 | 0. 723081 | 0. 796792 |
| C15ORF40  | 15q25. 2   | -0. 026660808 | 0. 723143 | 0. 796817 |
| RBMS1     | 2q24. 2    | 0. 026587576  | 0. 723873 | 0. 797577 |
| KRTAP2-2  | 17q21. 2   | 0. 026578574  | 0. 723962 | 0. 797632 |
| CPNE6     | 14q11. 2   | -0. 026574356 | 0. 724004 | 0. 797634 |



|           |            |               |           |           |
|-----------|------------|---------------|-----------|-----------|
| ZNF805    | 19q13. 43  | 0. 026568744  | 0. 72406  | 0. 797652 |
| APOL4     | 22q12. 3   | -0. 026545728 | 0. 72429  | 0. 79786  |
| RPL13P5   | 12p13. 31  | 0. 026537359  | 0. 724373 | 0. 797908 |
| ARL17B    | 17q21. 31  | 0. 026515407  | 0. 724592 | 0. 798105 |
| PRMT3     | 11p15. 1   | 0. 026510158  | 0. 724644 | 0. 798119 |
| SLC30A7   | 1p21. 2    | -0. 026503881 | 0. 724707 | 0. 798144 |
| ARID3B    | 15q24. 1   | 0. 026497604  | 0. 724769 | 0. 798169 |
| HSPB2     | 11q23. 1   | 0. 026470404  | 0. 72504  | 0. 79836  |
| LINC02145 | 5p15. 31   | -0. 026469395 | 0. 725051 | 0. 79836  |
| VKORC1    | 16p11. 2   | 0. 026464127  | 0. 725103 | 0. 79836  |
| ZNF777    | 7q36. 1    | -0. 026464127 | 0. 725103 | 0. 79836  |
| MLH3      | 14q24. 3   | -0. 02644948  | 0. 725249 | 0. 798477 |
| ABT1      | 6p22. 2    | -0. 026432741 | 0. 725416 | 0. 798617 |
| ANTXR1    | 2p13. 3    | 0. 026428556  | 0. 725458 | 0. 798619 |
| SEPTIN11  | 4q21. 1    | -0. 026403448 | 0. 725708 | 0. 79885  |
| DRICH1    | 22q11. 23  | 0. 026360989  | 0. 726132 | 0. 799273 |
| FREM2     | 13q13. 3   | -0. 026355338 | 0. 726188 | 0. 799291 |
| IL2ORA    | 6q23. 3    | 0. 026338585  | 0. 726355 | 0. 799431 |
| RORC      | 1q21. 3    | -0. 026311385 | 0. 726626 | 0. 799666 |
| ZNF580    | 19q13. 42  | 0. 0263072    | 0. 726668 | 0. 799666 |
| DIP2A     | 21q22. 3   | 0. 026305107  | 0. 726689 | 0. 799666 |
| TRH       | 3q22. 1    | -0. 026279048 | 0. 726949 | 0. 799908 |
| PAX1      | 20p11. 22  | 0. 026262926  | 0. 72711  | 0. 800041 |
| SERPINA1  | 14q32. 13  | -0. 026256983 | 0. 727169 | 0. 800062 |
| AMMECR1   | Xq23       | -0. 026248614 | 0. 727253 | 0. 800066 |
| FGD2      | 6p21. 2    | 0. 026248614  | 0. 727253 | 0. 800066 |
| CCDC34    | 11p14. 1   | 0. 026238152  | 0. 727357 | 0. 800137 |
| DAD1P1    | 12p12. 1   | 0. 026225556  | 0. 727483 | 0. 800231 |
| KRT35     | 17q21. 2   | -0. 026176816 | 0. 727969 | 0. 800722 |
| NAA38     | 17p13. 1   | -0. 026141904 | 0. 728318 | 0. 801062 |
| FAM83G    | 17p11. 2   | -0. 026114703 | 0. 72859  | 0. 801316 |
| FOXB2     | 9q21. 2    | -0. 02611     | 0. 728637 | 0. 80132  |
| GNL1      | 6p21. 33   | 0. 026106334  | 0. 728673 | 0. 80132  |
| SALL4     | 20q13. 2   | -0. 026100056 | 0. 728736 | 0. 801345 |
| TGM7      | 15q15. 2-c | 0. 02609223   | 0. 728814 | 0. 801387 |
| ZNF691    | 1p34. 2    | -0. 026045655 | 0. 729279 | 0. 801854 |
| DMP1      | 4q22. 1    | -0. 026037494 | 0. 729361 | 0. 8019   |
| COG3      | 13q14. 13  | -0. 026031009 | 0. 729425 | 0. 801927 |
| DNAJA3    | 16p13. 3   | 0. 026016362  | 0. 729572 | 0. 802043 |
| MS4A15    | 11q12. 2   | -0. 025973425 | 0. 730001 | 0. 802471 |
| GTDC1     | 2q22. 3    | 0. 025953592  | 0. 730199 | 0. 8026   |
| TAOK2     | 16p11. 2   | 0. 025953592  | 0. 730199 | 0. 8026   |
| LINC00442 | 13q12. 11  | -0. 025940987 | 0. 730325 | 0. 802695 |
| GNPDA1    | 5q31. 3    | 0. 025922206  | 0. 730513 | 0. 802857 |
| 2-Mar     | 1q41       | -0. 025918021 | 0. 730554 | 0. 802859 |
| TEX15     | 8p12       | -0. 025907056 | 0. 730664 | 0. 802919 |
| C1QL3     | 10p13      | -0. 025904513 | 0. 73069  | 0. 802919 |
| ELANE     | 19p13. 3   | -0. 025889192 | 0. 730843 | 0. 803043 |
| GOLGA8B   | 15q14      | -0. 025848974 | 0. 731245 | 0. 803441 |
| FAM43A    | 3q29       | -0. 025817588 | 0. 731559 | 0. 803697 |
| GIP       | 17q21. 32  | 0. 025817581  | 0. 731559 | 0. 803697 |
| RTBDN     | 19p13. 13  | -0. 025808747 | 0. 731647 | 0. 80375  |
| IRF2BP1   | 19q13. 32  | -0. 025800849 | 0. 731726 | 0. 803793 |
| OR2AK2    | 1q44       | -0. 025783212 | 0. 731902 | 0. 803942 |

|           |           |              |          |          |
|-----------|-----------|--------------|----------|----------|
| AQP12B    | 2q37.3    | 0.025774848  | 0.731986 | 0.80399  |
| DPYD      | 1p21.3    | -0.025694139 | 0.732793 | 0.804832 |
| RAB3IL1   | 11q12.2-c | 0.025662754  | 0.733107 | 0.805133 |
| MAGEA9B   | Xq28      | -0.025645812 | 0.733277 | 0.805253 |
| PTX4      | 16p13.3   | -0.025643756 | 0.733297 | 0.805253 |
| DMRT3     | 9p24.3    | -0.025592129 | 0.733814 | 0.805718 |
| GBA       | 1q22      | 0.025591614  | 0.733819 | 0.805718 |
| ACE2      | Xp22.2    | 0.025587429  | 0.733861 | 0.805718 |
| SLC38A7   | 16q21     | -0.025585337 | 0.733882 | 0.805718 |
| SRP68     | 17q25.1   | -0.02557906  | 0.733945 | 0.805743 |
| TNC       | 9q33.1    | -0.025560228 | 0.734133 | 0.805886 |
| SYT13     | 11p11.2   | -0.025556044 | 0.734175 | 0.805886 |
| H19       | 11p15.5   | -0.025553951 | 0.734196 | 0.805886 |
| E2F2      | 1p36.12   | 0.02554349   | 0.734301 | 0.805957 |
| SRSF5     | 14q24.1   | 0.02553512   | 0.734385 | 0.806005 |
| MTPAP     | 10p11.23  | -0.025501642 | 0.73472  | 0.806328 |
| THY1      | 11q23.3   | -0.025491181 | 0.734825 | 0.806399 |
| PLPPR3    | 19p13.3   | 0.025460203  | 0.735135 | 0.806678 |
| POLR3E    | 16p12.2   | 0.025457703  | 0.73516  | 0.806678 |
| PP7080    | 5p15.33   | 0.025453518  | 0.735202 | 0.80668  |
| PARD6G    | 18q23     | -0.025449334 | 0.735244 | 0.806682 |
| COL4A2    | 13q34     | 0.025432595  | 0.735412 | 0.806821 |
| TMEM128   | 4p16.3    | 0.025417948  | 0.735558 | 0.806894 |
| TMEM50B   | 21q22.11  | 0.025417948  | 0.735558 | 0.806894 |
| TUT7      | 9q21.33   | -0.025411671 | 0.735621 | 0.806918 |
| C12ORF71  | 12p11.23  | -0.025399614 | 0.735742 | 0.806991 |
| MRPL36    | 5p15.33   | -0.025397025 | 0.735768 | 0.806991 |
| OR10A3    | 11p15.4   | 0.025374962  | 0.735989 | 0.807189 |
| ARL4A     | 7p21.3    | 0.025367732  | 0.736061 | 0.807224 |
| RGS16     | 1q25.3    | 0.025309146  | 0.736648 | 0.807824 |
| MEST      | 7q32.2    | 0.025300776  | 0.736732 | 0.807827 |
| TRIP12    | 2q36.3    | -0.025300776 | 0.736732 | 0.807827 |
| NECAB3    | 20q11.22  | -0.025292407 | 0.736816 | 0.807875 |
| RHEX      | 1q32.1    | 0.025273576  | 0.737005 | 0.808016 |
| ATAD2     | 8q24.13   | -0.025271483 | 0.737026 | 0.808016 |
| RAB5B     | 12q13.2   | -0.025263114 | 0.73711  | 0.808064 |
| KCNJ4     | 22q13.1   | 0.025248649  | 0.737255 | 0.808159 |
| NDRG2     | 14q11.2   | -0.025246375 | 0.737278 | 0.808159 |
| OR5B12    | 11q12.1   | -0.025226417 | 0.737478 | 0.808323 |
| GPAA1     | 8q24.3    | 0.025223359  | 0.737508 | 0.808323 |
| RBM47     | 4p14      | 0.025173143  | 0.738012 | 0.808831 |
| FGFR3     | 4p16.3    | 0.025152219  | 0.738222 | 0.808987 |
| SPATA31A1 | 9p12      | 0.025150876  | 0.738235 | 0.808987 |
| MSANTD3   | 9q31.1    | 0.025139665  | 0.738348 | 0.809066 |
| ETV2      | 19q13.12  | -0.02513548  | 0.73839  | 0.809067 |
| CDC25B    | 20p13     | -0.025125018 | 0.738495 | 0.809105 |
| RAB19     | 7q34      | -0.025123985 | 0.738505 | 0.809105 |
| LAMP1     | 13q34     | 0.025114557  | 0.7386   | 0.809164 |
| TXNRD3NB  | 3q21.3    | 0.025085264  | 0.738893 | 0.809442 |
| OXA1L     | 14q11.2   | 0.025068525  | 0.739061 | 0.809581 |
| LAGE3     | Xq28      | 0.02502877   | 0.73946  | 0.809974 |
| TCHHL1    | 1q21.3    | -0.025017185 | 0.739576 | 0.810057 |
| GLYCTK    | 3p21.2    | -0.024934614 | 0.740405 | 0.81092  |
| NOBOX     | 7q35      | -0.024904152 | 0.740711 | 0.81121  |

|           |            |               |           |           |
|-----------|------------|---------------|-----------|-----------|
| SP7       | 12q13. 13  | -0. 024892204 | 0. 740831 | 0. 811297 |
| IDH3B     | 20p13      | 0. 024884397  | 0. 740909 | 0. 811339 |
| TAS2R30   | 12p13. 2   | 0. 024873693  | 0. 741017 | 0. 811412 |
| ABCC5     | 3q27. 1    | -0. 024838365 | 0. 741372 | 0. 811756 |
| CYS1      | 2p25. 1    | -0. 024834181 | 0. 741414 | 0. 811758 |
| CARD9     | 9q34. 3    | -0. 024821627 | 0. 74154  | 0. 811851 |
| PILRA     | 7q22. 1    | -0. 024817442 | 0. 741582 | 0. 811853 |
| MMP23A    | 1p36. 33   | 0. 024793623  | 0. 741821 | 0. 812063 |
| PROSER1   | 13q13. 3   | -0. 024790241 | 0. 741855 | 0. 812063 |
| FHAD1     | 1p36. 21   | -0. 024744209 | 0. 742317 | 0. 812525 |
| LINC00207 | 22q13. 31  | -0. 024696339 | 0. 742798 | 0. 812965 |
| PIK3R6    | 17p13. 1   | 0. 024696085  | 0. 742801 | 0. 812965 |
| PFN1P2    | 1p11. 2    | -0. 024683531 | 0. 742927 | 0. 813058 |
| CYP4A22   | 1p33       | -0. 024667098 | 0. 743092 | 0. 813195 |
| OR6N2     | 1q23. 1    | -0. 024659445 | 0. 743169 | 0. 813234 |
| GALNS     | 16q24. 3   | 0. 024597744  | 0. 743789 | 0. 813868 |
| ARSE      | Xp22. 33   | 0. 024532881  | 0. 744442 | 0. 814537 |
| SPATA31A  | 9q21. 11   | -0. 024493653 | 0. 744836 | 0. 814924 |
| LRRC39    | 1p21. 2    | 0. 02448796   | 0. 744893 | 0. 814943 |
| OR56B1    | 11p15. 4   | 0. 02446609   | 0. 745113 | 0. 815101 |
| MYC       | 8q24. 21   | -0. 024461741 | 0. 745157 | 0. 815101 |
| NOX5      | 15q23      | -0. 024461424 | 0. 74516  | 0. 815101 |
| TMEM211   | 22q11. 23  | 0. 024442136  | 0. 745354 | 0. 815268 |
| FOXN2     | 2p16. 3    | -0. 024417802 | 0. 745599 | 0. 815491 |
| UEVLD     | 11p15. 1   | -0. 024413617 | 0. 745641 | 0. 815493 |
| MLLT1     | 19p13. 3   | 0. 024382232  | 0. 745957 | 0. 815794 |
| VTCN1     | 1p13. 1-p1 | -0. 024363451 | 0. 746146 | 0. 815949 |
| UNC50     | 2q11. 2    | -0. 024359216 | 0. 746189 | 0. 815949 |
| CFAP410   | 21q22. 3   | -0. 024352939 | 0. 746252 | 0. 815949 |
| GPR84     | 12q13. 13  | -0. 024351905 | 0. 746262 | 0. 815949 |
| PIGT      | 20q13. 12  | -0. 024344569 | 0. 746336 | 0. 815985 |
| CNTROB    | 17p13. 1   | -0. 024298537 | 0. 746799 | 0. 816447 |
| SNORA56   | Xq28       | 0. 02427954   | 0. 746991 | 0. 816611 |
| RPL22     | 1p36. 31   | -0. 024260875 | 0. 747179 | 0. 816772 |
| SELENOO   | 22q13. 33  | 0. 024254598  | 0. 747242 | 0. 816796 |
| MSN       | Xq12       | 0. 024237859  | 0. 74741  | 0. 816936 |
| ELK1      | Xp11. 23   | -0. 024233674 | 0. 747452 | 0. 816937 |
| ACBD3     | 1q42. 12   | -0. 024216936 | 0. 747621 | 0. 817077 |
| ARR3      | Xq13. 1    | -0. 024151917 | 0. 748276 | 0. 817748 |
| PPP3R2    | 9q31. 1    | -0. 024139534 | 0. 748401 | 0. 817839 |
| SCARNA16  | 17q25. 2   | -0. 024129427 | 0. 748502 | 0. 817906 |
| HAUS2     | 15q15. 2   | 0. 024120687  | 0. 74859  | 0. 817957 |
| LINC01138 | 1q21. 2    | -0. 024097091 | 0. 748828 | 0. 818167 |
| OCA2      | 15q12-q15  | 0. 024093474  | 0. 748865 | 0. 818167 |
| GBP1      | 1p22. 2    | -0. 024068378 | 0. 749117 | 0. 818349 |
| ELF1      | 13q14. 11  | -0. 024066286 | 0. 749138 | 0. 818349 |
| TSPYL6    | 2p16. 2    | -0. 02406479  | 0. 749154 | 0. 818349 |
| OSBP2     | 22q12. 2   | 0. 024053732  | 0. 749265 | 0. 818412 |
| TRIML1    | 4q35. 2    | -0. 024050955 | 0. 749293 | 0. 818412 |
| EIF2D     | 1q32. 1    | 0. 024026531  | 0. 749539 | 0. 818636 |
| GALNT2    | 1q42. 13   | -0. 024011885 | 0. 749687 | 0. 818752 |
| TMEM74B   | 20p13      | 0. 024005608  | 0. 74975  | 0. 818777 |
| CELF1     | 11p11. 2   | -0. 024001423 | 0. 749792 | 0. 818778 |
| OR7A5     | 19p13. 12  | -0. 023986094 | 0. 749947 | 0. 818902 |

|           |           |               |           |           |
|-----------|-----------|---------------|-----------|-----------|
| ANKAR     | 2q32. 2   | -0. 023981558 | 0. 749992 | 0. 818907 |
| OR9G9     | 11q11     | 0. 023977161  | 0. 750037 | 0. 818911 |
| HOMER2    | 15q25. 2  | -0. 023957483 | 0. 750235 | 0. 819016 |
| TMEM135   | 11q14. 2  | -0. 023957483 | 0. 750235 | 0. 819016 |
| SNW1      | 14q24. 3  | 0. 023955391  | 0. 750256 | 0. 819016 |
| BRDTP1    | Xq21. 33  | 0. 02389179   | 0. 750897 | 0. 819649 |
| CDRT15P1  | 17p12     | -0. 023886481 | 0. 750951 | 0. 819649 |
| LINC01959 | 5q31. 1   | 0. 02388402   | 0. 750976 | 0. 819649 |
| TMEM244   | 6q22. 33  | -0. 023881629 | 0. 751    | 0. 819649 |
| OR4N4     | 15q11. 2  | 0. 023867527  | 0. 751142 | 0. 81976  |
| TTY1B     | Yp11. 2   | -0. 023845574 | 0. 751363 | 0. 819948 |
| ATL3      | 11q13. 1  | 0. 023840311  | 0. 751417 | 0. 819948 |
| ABITRAM   | 9q31. 3   | 0. 023838219  | 0. 751438 | 0. 819948 |
| SAG       | 2q37. 1   | 0. 023815322  | 0. 751669 | 0. 820155 |
| INGX      | Xq13. 1   | -0. 023810516 | 0. 751717 | 0. 820163 |
| DPF2      | 11q13. 1  | 0. 023704308  | 0. 752789 | 0. 821243 |
| PAAF1     | 11q13. 4  | 0. 023704308  | 0. 752789 | 0. 821243 |
| TCTEX1D2  | 3q29      | -0. 023660369 | 0. 753232 | 0. 821682 |
| DNHD1     | 11p15. 4  | -0. 023645722 | 0. 75338  | 0. 821798 |
| CXCL11    | 4q21. 1   | 0. 023622706  | 0. 753612 | 0. 822007 |
| SNORD97   | 11p15. 4  | 0. 023602732  | 0. 753814 | 0. 822141 |
| AKR1C6P   | 10p15. 1  | -0. 023602339 | 0. 753818 | 0. 822141 |
| ADAM30    | 1p12      | -0. 023588047 | 0. 753962 | 0. 822219 |
| IQGAP1    | 15q26. 1  | 0. 023587136  | 0. 753971 | 0. 822219 |
| DNMT3B    | 20q11. 21 | 0. 02353692   | 0. 754478 | 0. 822727 |
| SSX1      | Xp11. 23  | -0. 023518875 | 0. 754661 | 0. 822881 |
| SCARNA8   | 9p22. 1   | -0. 023508988 | 0. 75476  | 0. 822945 |
| BCAS3     | 17q23. 2  | -0. 023486703 | 0. 754986 | 0. 823108 |
| VCX2      | Xp22. 31  | 0. 023485992  | 0. 754993 | 0. 823108 |
| CNTNAP2   | 7q35-q36. | -0. 023467872 | 0. 755176 | 0. 823263 |
| UBE2Q2P1  | 15q25. 2  | -0. 023451133 | 0. 755345 | 0. 823402 |
| LINC02249 | 15q13. 2  | -0. 023438669 | 0. 755471 | 0. 823494 |
| GCNT7     | 20q13. 31 | -0. 023426553 | 0. 755593 | 0. 823583 |
| EEF2K     | 16p12. 2  | 0. 023417655  | 0. 755683 | 0. 823636 |
| CALCOCO2  | 17q21. 32 | -0. 023411378 | 0. 755747 | 0. 82366  |
| DYNC1LI2  | 16q22. 1  | -0. 023373716 | 0. 756127 | 0. 82403  |
| TRAPPC10  | 21q22. 3  | -0. 023369531 | 0. 756169 | 0. 824031 |
| HSPB7     | 1p36. 13  | -0. 023294206 | 0. 756931 | 0. 824816 |
| TMEM169   | 2q35      | 0. 02327119   | 0. 757163 | 0. 825024 |
| DNAAF4    | 15q21. 3  | 0. 023258636  | 0. 75729  | 0. 825118 |
| LRRC17    | 7q22. 1   | 0. 023225158  | 0. 757629 | 0. 825399 |
| POLR2J4   | 7p13      | 0. 023220974  | 0. 757671 | 0. 825399 |
| KIF9      | 3p21. 31  | 0. 023218881  | 0. 757692 | 0. 825399 |
| MMP2      | 16q12. 2  | -0. 023216789 | 0. 757713 | 0. 825399 |
| OR8D1     | 11q24. 2  | 0. 023208889  | 0. 757793 | 0. 825441 |
| OR1N1     | 9q33. 2   | 0. 023175079  | 0. 758135 | 0. 825707 |
| BAG4      | 8p11. 23  | -0. 023174942 | 0. 758137 | 0. 825707 |
| SIGLECL1  | 19q13. 41 | -0. 023172435 | 0. 758162 | 0. 825707 |
| COX7B2    | 4p12      | 0. 02313623   | 0. 758528 | 0. 826028 |
| METTL21A  | 2q33. 3   | -0. 023135187 | 0. 758539 | 0. 826028 |
| SNX31     | 8q22. 3   | -0. 023130014 | 0. 758591 | 0. 82604  |
| DSG4      | 18q12. 1  | 0. 023104509  | 0. 758849 | 0. 826276 |
| INTS9     | 8p21. 1   | 0. 023097525  | 0. 75892  | 0. 826286 |
| CPNE5     | 6p21. 2   | -0. 023095432 | 0. 758941 | 0. 826286 |

|           |                     |               |           |           |
|-----------|---------------------|---------------|-----------|-----------|
| ESS2      | 22q11. 21           | 0. 023091248  | 0. 758983 | 0. 826287 |
| S100A9    | 1q21. 3             | -0. 023078694 | 0. 75911  | 0. 82638  |
| DAGLA     | 11q12. 2            | 0. 023049401  | 0. 759407 | 0. 826657 |
| ZMYND10   | 3p21. 31            | 0. 023028489  | 0. 759618 | 0. 826843 |
| TLR5      | 1q41                | 0. 023018015  | 0. 759724 | 0. 826913 |
| ZNF512    | 2p23. 3             | -0. 023003369 | 0. 759872 | 0. 827026 |
| FAM163B   | 9q34. 2             | 0. 022999374  | 0. 759913 | 0. 827026 |
| SSX6P     | Xp11. 23            | 0. 022995511  | 0. 759952 | 0. 827026 |
| EPHA8     | 1p36. 12            | 0. 022923196  | 0. 760684 | 0. 827772 |
| THUMPD3   | 3p25. 3             | 0. 02291864   | 0. 76073  | 0. 827772 |
| DNAH14    | 1q42. 12            | 0. 022915502  | 0. 760762 | 0. 827772 |
| SNX9      | 6q25. 3             | 0. 022894566  | 0. 760974 | 0. 827958 |
| KRTAP4-7  | 17q21. 2            | 0. 022880224  | 0. 761119 | 0. 828007 |
| RSPH3     | 6q25. 3             | -0. 02287992  | 0. 761122 | 0. 828007 |
| RASSF5    | 1q32. 1             | 0. 022877827  | 0. 761143 | 0. 828007 |
| LINC00964 | 8q24. 13            | 0. 02285853   | 0. 761339 | 0. 828174 |
| ABHD14A   | 3p21. 2             | -0. 022846442 | 0. 761461 | 0. 828262 |
| NTNG2     | 9q34. 13            | -0. 022825518 | 0. 761673 | 0. 828448 |
| HHATL     | 3p22. 1             | 0. 022811095  | 0. 761819 | 0. 828562 |
| WDR24     | 16p13. 3            | -0. 022766932 | 0. 762266 | 0. 828966 |
| TUBB7P    | 4q35. 2             | -0. 022766203 | 0. 762274 | 0. 828966 |
| HGSNAT    | 8p11. 21- $\Gamma$  | 0. 022737639  | 0. 762563 | 0. 82919  |
| SNRNP27   | 2p13. 3             | 0. 022737639  | 0. 762563 | 0. 82919  |
| TAS2R46   | 12p13. 2            | -0. 022708385 | 0. 762859 | 0. 829468 |
| GPR180    | 13q32. 1            | -0. 022697885 | 0. 762966 | 0. 829538 |
| PRAF2     | Xp11. 23            | -0. 0226937   | 0. 763008 | 0. 829539 |
| RPL23AP64 | 11q23. 3            | -0. 022677222 | 0. 763175 | 0. 829675 |
| RBM25     | 14q24. 2            | -0. 022628837 | 0. 763666 | 0. 830163 |
| NUDT17    | 1q21. 1             | 0. 02262256   | 0. 763729 | 0. 830187 |
| TOB2P1    | 6p22. 1             | -0. 022597452 | 0. 763984 | 0. 830419 |
| BCLAF3    | Xp22. 12            | 0. 022591174  | 0. 764047 | 0. 830443 |
| COX7A1    | 19q13. 12           | -0. 022584897 | 0. 764111 | 0. 830467 |
| PRMT2     | 21q22. 3            | 0. 02257862   | 0. 764175 | 0. 830491 |
| GRID2     | 4q22. 1-q $\zeta$   | 0. 022548214  | 0. 764483 | 0. 830781 |
| LBX1      | 10q24. 32           | 0. 022537144  | 0. 764595 | 0. 830816 |
| NME7      | 1q24. 2             | 0. 022536773  | 0. 764599 | 0. 830816 |
| GPRIN1    | 5q35. 2             | 0. 022522127  | 0. 764747 | 0. 830933 |
| AIF1      | 6p21. 33            | -0. 022513757 | 0. 764832 | 0. 830935 |
| EXOC3     | 5p15. 33            | 0. 022513757  | 0. 764832 | 0. 830935 |
| KRT36     | 17q21. 2            | 0. 022467658  | 0. 7653   | 0. 831397 |
| PIP4P1    | 14q11. 2            | 0. 022457264  | 0. 765405 | 0. 831467 |
| IFNAR1    | 21q22. 11           | -0. 022446802 | 0. 765511 | 0. 831537 |
| KRCC1     | 2p11. 2             | -0. 02243634  | 0. 765617 | 0. 831539 |
| ZC3HAV1L  | 7q34                | -0. 02243634  | 0. 765617 | 0. 831539 |
| DEPTOR    | 8q24. 12            | -0. 022434248 | 0. 765639 | 0. 831539 |
| RPL13AP3  | 14q22. 3            | 0. 022427971  | 0. 765702 | 0. 831562 |
| ZAR1L     | 13q13. 1            | 0. 022424023  | 0. 765742 | 0. 831562 |
| ZNF613    | 19q13. 41           | 0. 022413324  | 0. 765851 | 0. 831612 |
| SYNE4     | 19q13. 12           | 0. 022411232  | 0. 765872 | 0. 831612 |
| CALU      | 7q32. 1             | -0. 022404955 | 0. 765936 | 0. 831636 |
| ASMT      | Xp22. 33 $\epsilon$ | -0. 022393941 | 0. 766048 | 0. 831707 |
| SLC2A3    | 12p13. 31           | 0. 022390308  | 0. 766084 | 0. 831707 |
| C11ORF54  | 11q21               | 0. 022377754  | 0. 766212 | 0. 8318   |
| PGAM4     | Xq21. 1             | -0. 022367292 | 0. 766318 | 0. 83187  |

|           |          |              |          |          |
|-----------|----------|--------------|----------|----------|
| EFS       | 14q11.2  | 0.022344276  | 0.766551 | 0.832056 |
| LPIN1     | 2p25.1   | -0.022342184 | 0.766573 | 0.832056 |
| THSD4     | 15q23    | 0.022337999  | 0.766615 | 0.832057 |
| FM09P     | 1q24.1   | 0.022292308  | 0.767079 | 0.832508 |
| CFTR      | 7q31.2   | -0.022288841 | 0.767114 | 0.832508 |
| ARL17A    | 17q21.31 | -0.022279413 | 0.76721  | 0.832522 |
| CCDC96    | 4p16.1   | -0.022279413 | 0.76721  | 0.832522 |
| ZMYND8    | 20q13.12 | -0.022273136 | 0.767273 | 0.832546 |
| MGAT2     | 14q21.3  | 0.022266859  | 0.767337 | 0.83257  |
| SNX11     | 17q21.32 | 0.02225012   | 0.767507 | 0.832709 |
| CEBPD     | 8q11.21  | -0.022229197 | 0.767719 | 0.832894 |
| CLDN15    | 7q22.1   | 0.022216643  | 0.767847 | 0.832944 |
| JPH1      | 8q21.11  | -0.022210366 | 0.767911 | 0.832944 |
| SMN2      | 5q13.2   | -0.022210366 | 0.767911 | 0.832944 |
| RMRP      | 9p13.3   | -0.022208273 | 0.767932 | 0.832944 |
| C20RF74   | 2p15     | -0.022191546 | 0.768102 | 0.833083 |
| GEMIN8P4  | 1p22.2   | 0.022176899  | 0.76825  | 0.833199 |
| SPINK8    | 3p21.31  | -0.02215869  | 0.768435 | 0.833322 |
| OR2T34    | 1q44     | -0.022157455 | 0.768448 | 0.833322 |
| SMC01     | 3q29     | -0.022131236 | 0.768714 | 0.833566 |
| GEMIN8    | Xp22.2   | 0.022124579  | 0.768782 | 0.833594 |
| PIP5K1C   | 19p13.3  | -0.02210784  | 0.768952 | 0.833733 |
| TMEM207   | 3q28     | -0.022092999 | 0.769102 | 0.833827 |
| TECTB     | 10q25.2  | 0.022091058  | 0.769122 | 0.833827 |
| POTEC     | 18p11.21 | 0.022056702  | 0.769471 | 0.834161 |
| LBH       | 2p23.1   | -0.022032515 | 0.769717 | 0.834336 |
| PDIA3P1   | 1q21.1   | 0.022032515  | 0.769717 | 0.834336 |
| APBA2     | 15q13.1  | 0.022007407  | 0.769972 | 0.834522 |
| STAG3L2   | 7q11.23  | -0.022007407 | 0.769972 | 0.834522 |
| CNTD2     | 19q13.2  | -0.021990668 | 0.770142 | 0.834661 |
| SYT2      | 1q32.1   | -0.021982299 | 0.770227 | 0.834708 |
| TTC16     | 9q34.11  | 0.021972078  | 0.770331 | 0.834753 |
| BPIFA2    | 20q11.21 | -0.021970066 | 0.770351 | 0.834753 |
| EML4      | 2p21     | 0.021955098  | 0.770503 | 0.834872 |
| MT1E      | 16q13    | 0.021919528  | 0.770865 | 0.835219 |
| HLA-E     | 6p22.1   | -0.021871404 | 0.771354 | 0.835703 |
| CTSK      | 1q21.3   | -0.021865127 | 0.771418 | 0.835706 |
| EWSR1     | 22q12.2  | -0.02185885  | 0.771482 | 0.835706 |
| IRF2      | 4q35.1   | 0.02185885   | 0.771482 | 0.835706 |
| MRPL54    | 19p13.3  | 0.021842111  | 0.771652 | 0.835826 |
| OR1J2     | 9q33.2   | 0.021839706  | 0.771676 | 0.835826 |
| TMEM52    | 1p36.33  | 0.021833741  | 0.771737 | 0.835846 |
| CDCA7L    | 7p15.3   | -0.021827464 | 0.771801 | 0.83587  |
| CPNE9     | 3p25.3   | 0.021802773  | 0.772052 | 0.836097 |
| GTF3C3    | 2q33.1   | -0.021791894 | 0.772162 | 0.836171 |
| GNE       | 9p13.3   | -0.021781432 | 0.772269 | 0.836241 |
| RASGRP1   | 15q14    | -0.021777248 | 0.772311 | 0.836242 |
| OR6C1     | 12q13.2  | -0.021758333 | 0.772504 | 0.836359 |
| OR8B2     | 11q24.2  | -0.021758333 | 0.772504 | 0.836359 |
| MACROD2   | 20p12.1  | -0.021745862 | 0.772631 | 0.836373 |
| RPS27     | 1q21.3   | -0.02174377  | 0.772652 | 0.836373 |
| ZDHHC23   | 3q13.31  | -0.021741678 | 0.772673 | 0.836373 |
| LINC0031C | 21q22.11 | 0.021740643  | 0.772684 | 0.836373 |
| KCNJ13    | 2q37.1   | 0.021732125  | 0.77277  | 0.836422 |

|           |           |              |          |          |
|-----------|-----------|--------------|----------|----------|
| LINC-PIN1 | 7q32.3    | 0.021720754  | 0.772886 | 0.836501 |
| RELL1     | 4p14      | -0.021712385 | 0.772971 | 0.836548 |
| AZIN2     | 1p35.1    | -0.021704015 | 0.773056 | 0.836595 |
| RENBP     | Xq28      | 0.021683092  | 0.773269 | 0.83678  |
| LOC645752 | 15q24.3   | 0.021675647  | 0.773345 | 0.836817 |
| GBX2      | 2q37.2    | 0.021669146  | 0.773411 | 0.836843 |
| HINT2     | 9p13.3    | -0.021660076 | 0.773503 | 0.836898 |
| CENPJ     | 13q12.12- | 0.021651706  | 0.773588 | 0.836944 |
| OC90      | 8q24.22   | -0.021638547 | 0.773722 | 0.837039 |
| PTH       | 11p15.3   | -0.021633074 | 0.773778 | 0.837039 |
| DNAJC11   | 1p36.31   | 0.021630783  | 0.773801 | 0.837039 |
| AFG3L1P   | 16q24.3   | 0.021614044  | 0.773972 | 0.837177 |
| OR10Q1    | 11q12.1   | 0.021606647  | 0.774047 | 0.837177 |
| ZMYM1     | 1p34.3    | -0.021605674 | 0.774057 | 0.837177 |
| PANX3     | 11q24.2   | 0.021601802  | 0.774096 | 0.837177 |
| CPNE8     | 12q12     | 0.02156592   | 0.774461 | 0.837526 |
| ZNF576    | 19q13.31  | 0.021561735  | 0.774504 | 0.837527 |
| LINC00112 | 21q22.3   | -0.02154242  | 0.7747   | 0.837668 |
| PYDC1     | 16p11.2   | 0.021540687  | 0.774718 | 0.837668 |
| TPRX1     | 19q13.33  | 0.021521875  | 0.77491  | 0.83783  |
| PGLYRP2   | 19p13.12  | -0.021516504 | 0.774964 | 0.837843 |
| ARL13A    | Xq22.1    | 0.02149789   | 0.775154 | 0.838003 |
| MICB      | 6p21.33   | 0.021488503  | 0.775249 | 0.838061 |
| C2ORF70   | 2p23.3    | 0.021457128  | 0.775569 | 0.838361 |
| PTPN22    | 1p13.2    | -0.021442471 | 0.775718 | 0.838477 |
| HIGD1C    | 12q13.12  | 0.021419204  | 0.775955 | 0.838688 |
| CLPTMIL   | 5p15.33   | -0.021413178 | 0.776016 | 0.838709 |
| PTK2      | 8q24.3    | -0.021362961 | 0.776528 | 0.839216 |
| FDCSP     | 4q13.3 4c | 0.021314584  | 0.77702  | 0.839703 |
| TPTE2     | 13q12.11  | -0.021278312 | 0.77739  | 0.840024 |
| RASSF9    | 12q21.31  | -0.021277174 | 0.777402 | 0.840024 |
| SPANXN5   | Xp11.22   | 0.021264888  | 0.777527 | 0.840094 |
| LSG1      | 3q29      | 0.021262528  | 0.777551 | 0.840094 |
| RAD51AP2  | 2p24.2    | -0.021255166 | 0.777626 | 0.84013  |
| DDRGK1    | 20p13     | 0.021241604  | 0.777764 | 0.840234 |
| TGFBR2    | 3p24.1    | -0.021235327 | 0.777828 | 0.840258 |
| L3MBTL3   | 6q23.1    | 0.021226958  | 0.777913 | 0.840304 |
| MAF       | 16q23.2   | -0.021222773 | 0.777956 | 0.840305 |
| RRBP1     | 20p12.1   | 0.021195573  | 0.778233 | 0.840537 |
| TRIM66    | 11p15.4   | -0.02119348  | 0.778254 | 0.840537 |
| MYOZ1     | 10q22.2   | 0.021189307  | 0.778297 | 0.840537 |
| TREML2    | 6p21.1    | -0.021168416 | 0.77851  | 0.840677 |
| BTBD19    | 1p34.1    | -0.021168372 | 0.77851  | 0.840677 |
| PSMD6     | 3p14.1    | -0.021147448 | 0.778724 | 0.840794 |
| MIR503HG  | Xq26.3    | -0.021145356 | 0.778745 | 0.840794 |
| RAB40B    | 17q25.3   | 0.021145356  | 0.778745 | 0.840794 |
| POLR3D    | 8p21.3    | -0.021126525 | 0.778937 | 0.840956 |
| TMEM14B   | 6p24.2    | 0.021101417  | 0.779193 | 0.841187 |
| CCT4      | 2p15      | 0.021088862  | 0.779321 | 0.841279 |
| RBMXL3    | Xq23      | 0.021077     | 0.779442 | 0.841342 |
| SFTA1P    | 10p14     | 0.021073561  | 0.779477 | 0.841342 |
| TRIM53AP  | 11q14.3   | 0.02107079   | 0.779505 | 0.841342 |
| XIST      | Xq13.2    | -0.021038267 | 0.779837 | 0.841654 |
| SDC4P     | 22q12.2   | -0.021004794 | 0.780178 | 0.841977 |

|           |           |              |          |          |
|-----------|-----------|--------------|----------|----------|
| SRL       | 16p13.3   | -0.020984245 | 0.780388 | 0.842158 |
| YAP1      | 11q22.1   | 0.020977967  | 0.780452 | 0.842182 |
| FAM53A    | 4p16.3    | -0.020967506 | 0.780558 | 0.842251 |
| MYH4      | 17p13.1   | -0.020941921 | 0.780819 | 0.842487 |
| OR4N3P    | 15q11.2   | -0.020927245 | 0.780969 | 0.842603 |
| REC8      | 14q12     | 0.020898458  | 0.781263 | 0.842859 |
| LINC01312 | 26q23.2   | -0.020895768 | 0.78129  | 0.842859 |
| ARL6IP4   | 12q24.31  | -0.02087335  | 0.781519 | 0.84306  |
| NRARP     | 9q34.3    | -0.020867073 | 0.781583 | 0.843084 |
| INTS8     | 8q22.1    | 0.020848241  | 0.781775 | 0.843246 |
| STMN2     | 8q21.13   | -0.020821041 | 0.782053 | 0.843499 |
| UTS2B     | 3q28      | -0.020806623 | 0.7822   | 0.843613 |
| ARL2BP    | 16q13     | 0.020789655  | 0.782373 | 0.843731 |
| MICU2     | 13q12.11  | -0.020787563 | 0.782394 | 0.843731 |
| SLFNL1    | 1p34.2    | 0.020762466  | 0.782651 | 0.843942 |
| TBC1D3P1  | 17q23.1   | -0.020756227 | 0.782714 | 0.843942 |
| SCNN1G    | 16p12.2   | -0.020756044 | 0.782716 | 0.843942 |
| SEC11A    | 15q25.2-c | 0.020749901  | 0.782779 | 0.843964 |
| GON4L     | 1q22      | 0.020735254  | 0.782928 | 0.844079 |
| PABPC3    | 13q12.13  | 0.020714331  | 0.783142 | 0.844264 |
| TRMT61B   | 2p23.2    | -0.020710146 | 0.783185 | 0.844265 |
| HAVCR2    | 5q33.3    | -0.020695499 | 0.783334 | 0.84438  |
| PDYN      | 20p13     | -0.020679218 | 0.7835   | 0.844512 |
| LOC100240 | 12q13.13  | -0.020675247 | 0.783541 | 0.844512 |
| BTF3P11   | 13q22.3   | 0.020659968  | 0.783697 | 0.844635 |
| TIMP3     | 22q12.3   | 0.020655745  | 0.78374  | 0.844636 |
| OR52B2    | 11p15.4   | 0.020629517  | 0.784008 | 0.844879 |
| HLA-DQA2  | 6p21.32   | 0.020601343  | 0.784296 | 0.845143 |
| UFC1      | 1q23.3    | 0.020567866  | 0.784638 | 0.845444 |
| METTL23   | 17q25.1   | -0.020565773 | 0.784659 | 0.845444 |
| XAGE2     | Xp11.22   | 0.020557897  | 0.78474  | 0.845479 |
| SPIB      | 19q13.33  | 0.020554276  | 0.784777 | 0.845479 |
| SLC19A3   | 2q36.3    | -0.02054485  | 0.784873 | 0.845537 |
| PRRT2     | 16p11.2   | 0.020534388  | 0.78498  | 0.845607 |
| SCAF4     | 21q22.11  | 0.020523926  | 0.785087 | 0.845676 |
| NRXN2     | 11q13.1   | -0.020505095 | 0.785279 | 0.845838 |
| MEIOC     | 17q21.31  | -0.020488367 | 0.78545  | 0.845977 |
| RHOBTB2   | 8p21.3    | 0.020484171  | 0.785493 | 0.845977 |
| PTTG2     | 4p14      | -0.020466609 | 0.785672 | 0.846064 |
| DKFZP434A | 9q34.3    | 0.020464968  | 0.785689 | 0.846064 |
| AFP       | 4q13.3    | -0.020463837 | 0.785701 | 0.846064 |
| TMEM45A   | 3q12.2    | -0.020450694 | 0.785835 | 0.846163 |
| JDP2      | 14q24.3   | 0.020433955  | 0.786006 | 0.846302 |
| HIST1H2BA | 6p22.2    | -0.020414142 | 0.786208 | 0.846474 |
| GGT5      | 22q11.23  | -0.020385831 | 0.786498 | 0.84674  |
| LMF2      | 22q13.33  | 0.020360722  | 0.786754 | 0.846971 |
| LINC01341 | 1q44      | 0.020343994  | 0.786925 | 0.847109 |
| C7ORF66   | 7q31.1    | -0.020307778 | 0.787296 | 0.847375 |
| SCARNA27  | 6p24.3    | 0.020307778  | 0.787296 | 0.847375 |
| TAF11     | 6p21.31   | 0.020307378  | 0.7873   | 0.847375 |
| TMEM86A   | 11p15.1   | -0.020281213 | 0.787567 | 0.847618 |
| PSMB1     | 6q27      | 0.020262382  | 0.78776  | 0.847734 |
| RPAP1     | 15q15.1   | 0.020262382  | 0.78776  | 0.847734 |
| SNORA64   | 16p13.3   | -0.020256549 | 0.78782  | 0.847752 |



|           |           |              |          |          |
|-----------|-----------|--------------|----------|----------|
| MYH2      | 17p13.1   | -0.020246291 | 0.787924 | 0.847819 |
| MAP3K19   | 2q21.3    | 0.020238781  | 0.788001 | 0.847856 |
| INHBA     | 7p14.1    | -0.020226811 | 0.788124 | 0.847898 |
| RNF141    | 11p15.4 1 | 0.020222627  | 0.788166 | 0.847898 |
| BPGM      | 7q33      | 0.020220534  | 0.788188 | 0.847898 |
| PRPS2     | Xp22.2    | 0.020218442  | 0.788209 | 0.847898 |
| C9ORF50   | 9q34.11   | -0.02019719  | 0.788427 | 0.848014 |
| MSX1      | 4p16.2    | -0.020195426 | 0.788445 | 0.848014 |
| VN1R5     | 1q44      | -0.020191981 | 0.78848  | 0.848014 |
| FAM98A    | 2p22.3    | -0.020191241 | 0.788487 | 0.848014 |
| NUFIP1    | 13q14.12  | 0.020187057  | 0.78853  | 0.848015 |
| TTC39A    | 1p32.3    | 0.020155671  | 0.788851 | 0.848314 |
| RBM15     | 1p13.3    | -0.02013684  | 0.789044 | 0.848476 |
| AKAP5     | 14q23.3   | -0.020094993 | 0.789472 | 0.848731 |
| LSMEM1    | 7q31.1    | 0.020094993  | 0.789472 | 0.848731 |
| FAM91A1   | 8q24.13   | -0.020092901 | 0.789494 | 0.848731 |
| RTL3      | Xq21.1    | 0.020089083  | 0.789533 | 0.848731 |
| DPH7      | 9q34.3    | 0.020088716  | 0.789536 | 0.848731 |
| PDIA2     | 16p13.3   | 0.020088716  | 0.789536 | 0.848731 |
| CHST15    | 10q26.13  | -0.020042684 | 0.790007 | 0.849169 |
| C4ORF47   | 4q35.1    | -0.020040644 | 0.790028 | 0.849169 |
| GABRA6    | 5q34      | 0.01999905   | 0.790454 | 0.849531 |
| SPATA2    | 20q13.13  | -0.019998745 | 0.790457 | 0.849531 |
| INSYN2B   | 5q35.1    | -0.019995282 | 0.790493 | 0.849531 |
| PRDM16-D1 | 1p36.32   | 0.019969452  | 0.790757 | 0.849769 |
| OR1Q1     | 9q33.2    | -0.019930199 | 0.791159 | 0.850155 |
| HMG2P46   | 15q21.1   | 0.019912958  | 0.791335 | 0.850299 |
| SSBP3     | 1p32.3    | 0.019894127  | 0.791528 | 0.850461 |
| MOBP      | 3p22.1    | -0.019882005 | 0.791652 | 0.850549 |
| TBC1D1    | 4p14      | 0.019877388  | 0.7917   | 0.850554 |
| FBXO43    | 8q22.2    | -0.019854372 | 0.791935 | 0.850761 |
| VCPKMT    | 14q21.3   | 0.019848095  | 0.792    | 0.850784 |
| GINS3     | 16q21     | 0.019818802  | 0.7923   | 0.851061 |
| HOXD4     | 2q31.1    | 0.019800022  | 0.792492 | 0.851222 |
| F8A1      | Xq28      | 0.019789509  | 0.7926   | 0.851292 |
| MAP1LC3B2 | 12q24.22  | -0.019779047 | 0.792707 | 0.851338 |
| MSC       | 8q13.3    | 0.019776955  | 0.792728 | 0.851338 |
| FAM210A   | 18p11.21  | -0.019764401 | 0.792857 | 0.851387 |
| SNORA49   | 12q24.33  | -0.019764253 | 0.792858 | 0.851387 |
| MPDU1     | 17p13.1   | -0.019758124 | 0.792921 | 0.851408 |
| TEX33     | 22q12.3   | 0.019753298  | 0.79297  | 0.851416 |
| SFTA3     | 14q13.3   | 0.019743591  | 0.79307  | 0.851477 |
| INHA      | 2q35      | -0.019735108 | 0.793157 | 0.851524 |
| ALDOB     | 9q31.1    | -0.019728831 | 0.793221 | 0.851547 |
| CT45A6    | Xq26.3    | 0.019709562  | 0.793419 | 0.851714 |
| MED29     | 19q13.2   | 0.019693261  | 0.793586 | 0.851847 |
| TLX3      | 5q35.1    | 0.01968908   | 0.793628 | 0.851847 |
| COG2      | 1q42.2    | 0.019680706  | 0.793714 | 0.851848 |
| PRELP     | 1q32.1    | 0.019680706  | 0.793714 | 0.851848 |
| H2BFWT    | Xq22.2    | -0.01964636  | 0.794066 | 0.85218  |
| KLHL21    | 1p36.31   | -0.019615843 | 0.794379 | 0.852434 |
| OR52K2    | 11p15.4   | 0.019614958  | 0.794388 | 0.852434 |
| HAPLN2    | 1q23.1    | 0.019608427  | 0.794455 | 0.852448 |
| EIF1      | 17q21.2   | -0.019605382 | 0.794486 | 0.852448 |

|           |            |              |          |          |
|-----------|------------|--------------|----------|----------|
| INTS13    | 12p11. 23  | -0.019592827 | 0.794615 | 0.85254  |
| SH2D2A    | 1q23. 1    | 0.019582366  | 0.794722 | 0.852609 |
| ANKRD11   | 16q24. 3   | -0.019565627 | 0.794894 | 0.852748 |
| DIO2      | 14q31. 1   | -0.019561442 | 0.794937 | 0.852748 |
| DOT1L     | 19p13. 3   | -0.019555165 | 0.795001 | 0.852771 |
| TRAF5     | 1q32. 3    | -0.019527964 | 0.79528  | 0.853024 |
| SMARCC2   | 12q13. 2   | 0.019511225  | 0.795451 | 0.85314  |
| MDGA2     | 14q21. 3   | 0.019507006  | 0.795495 | 0.85314  |
| BICD1     | 12p11. 21  | 0.019504948  | 0.795516 | 0.85314  |
| OCM       | 7p22. 1    | 0.019414401  | 0.796444 | 0.85409  |
| CDR2      | 16p12. 2   | 0.019394054  | 0.796653 | 0.854268 |
| P4HB      | 17q25. 3   | 0.019354299  | 0.797061 | 0.854614 |
| ZC3H8     | 2q14. 1    | -0.019354299 | 0.797061 | 0.854614 |
| LYPLAL1   | 1q41       | 0.019331283  | 0.797297 | 0.85472  |
| UXS1      | 2q12. 2    | 0.01932919   | 0.797318 | 0.85472  |
| LINC02396 | 12q13. 12  | 0.019328823  | 0.797322 | 0.85472  |
| GJD4      | 10p11. 21  | 0.019327961  | 0.797331 | 0.85472  |
| ZNF530    | 19q13. 43  | 0.019306175  | 0.797554 | 0.854849 |
| LOC729603 | 6q25. 3    | -0.019304082 | 0.797576 | 0.854849 |
| LINC00326 | 6q23. 2    | 0.019303678  | 0.79758  | 0.854849 |
| SRP9      | 1q42. 12   | 0.019270604  | 0.797919 | 0.855145 |
| M1AP      | 2p13. 1    | 0.019268512  | 0.797941 | 0.855145 |
| DPRXP4    | 17q11. 2   | -0.019256532 | 0.798064 | 0.85523  |
| ARHGEF7   | 13q34      | 0.019220388  | 0.798435 | 0.855582 |
| GDPD5     | 11q13. 4-c | -0.019200521 | 0.798639 | 0.855743 |
| DNAJC8    | 1p35. 3    | -0.019197372 | 0.798671 | 0.855743 |
| KCNE2     | 21q22. 11  | 0.01918691   | 0.798778 | 0.855813 |
| SLC36A2   | 5q33. 1    | 0.019170926  | 0.798942 | 0.855942 |
| SLC5A11   | 16p12. 1   | -0.019147405 | 0.799184 | 0.856155 |
| NPNT      | 4q24       | -0.019134601 | 0.799315 | 0.85625  |
| NCR2      | 6p21. 1    | -0.019106599 | 0.799603 | 0.856488 |
| KRTAP1-3  | 17q21. 2   | -0.01910421  | 0.799627 | 0.856488 |
| OR4Q3     | 14q11. 2   | -0.019100462 | 0.799666 | 0.856488 |
| CYP2A6    | 19q13. 2   | 0.019084639  | 0.799828 | 0.856595 |
| WDR27     | 6q27       | -0.0190802   | 0.799874 | 0.856595 |
| LINC00895 | 22q11. 21  | -0.019078212 | 0.799894 | 0.856595 |
| KRT77     | 12q13. 13  | 0.019027968  | 0.80041  | 0.857078 |
| WSCD2     | 12q23. 3   | 0.019025898  | 0.800431 | 0.857078 |
| SNORA52   | 11p15. 5   | 0.018998675  | 0.800711 | 0.857332 |
| PXT1      | 6p21. 31   | 0.018978601  | 0.800917 | 0.857507 |
| YBEY      | 21q22. 3   | -0.018959899 | 0.801109 | 0.857666 |
| LINGO1    | 15q24. 3   | -0.018925366 | 0.801464 | 0.857931 |
| OOEP      | 6q13       | -0.018919468 | 0.801525 | 0.857931 |
| MST01     | 1q22       | -0.018919089 | 0.801529 | 0.857931 |
| ACACA     | 17q12      | -0.018914904 | 0.801572 | 0.857931 |
| RGS10     | 10q26. 11  | 0.018914904  | 0.801572 | 0.857931 |
| PAGE2     | Xp11. 21   | 0.018906609  | 0.801657 | 0.857977 |
| RRP36     | 6p21. 1    | 0.01889398   | 0.801787 | 0.85807  |
| SDF4      | 1p36. 33   | 0.018877241  | 0.801958 | 0.858185 |
| KCNN1     | 19p13. 11  | 0.018860542  | 0.80213  | 0.858185 |
| CSN1S2AP  | 4q13. 3    | 0.018857222  | 0.802164 | 0.858185 |
| OR10C1    | 6p22. 1    | -0.018857222 | 0.802164 | 0.858185 |
| OR52J3    | 11p15. 4   | -0.018857222 | 0.802164 | 0.858185 |
| SPACA7    | 13q34      | -0.018857222 | 0.802164 | 0.858185 |

|           |            |               |           |           |
|-----------|------------|---------------|-----------|-----------|
| LTB       | 6p21. 33   | 0. 018854226  | 0. 802195 | 0. 858185 |
| TBATA     | 10q22. 1   | -0. 018843119 | 0. 802309 | 0. 85824  |
| SPINK6    | 5q32       | 0. 0188409    | 0. 802332 | 0. 85824  |
| NPBWR2    | 20q13. 33  | -0. 018829055 | 0. 802454 | 0. 858324 |
| IFT27     | 22q12. 3   | -0. 018816563 | 0. 802582 | 0. 858415 |
| RPLP0     | 12q24. 23  | 0. 018808194  | 0. 802668 | 0. 858461 |
| DEPDC7    | 11p13      | -0. 01879564  | 0. 802797 | 0. 858553 |
| ZBTB48    | 1p36. 31   | 0. 018778901  | 0. 802969 | 0. 858669 |
| CNN1      | 19p13. 2   | -0. 018776808 | 0. 802991 | 0. 858669 |
| GALT      | 9p13. 3    | -0. 018770531 | 0. 803055 | 0. 858692 |
| TIGD5     | 8q24. 3    | -0. 018764254 | 0. 80312  | 0. 858715 |
| STPG2     | 4q22. 3-q2 | -0. 018758126 | 0. 803183 | 0. 858736 |
| HGD       | 3q13. 33   | -0. 0187517   | 0. 803249 | 0. 858761 |
| NFYC      | 1p34. 2    | -0. 018724499 | 0. 803528 | 0. 859014 |
| RNF31     | 14q12      | -0. 018720315 | 0. 803571 | 0. 859014 |
| MARK3     | 14q32. 32- | 0. 018711945  | 0. 803657 | 0. 85906  |
| SNORA38B  | 17q24. 2   | -0. 018697936 | 0. 803801 | 0. 859168 |
| OPN1SW    | 7q32. 1    | -0. 018689213 | 0. 803891 | 0. 859218 |
| IL34      | 16q22. 1   | 0. 018682652  | 0. 803958 | 0. 859244 |
| SPDL1     | 5q35. 1    | -0. 018665913 | 0. 804131 | 0. 859382 |
| LYAR      | 4p16. 3    | 0. 018642897  | 0. 804367 | 0. 859566 |
| DPEP2     | 16q22. 1   | -0. 018640805 | 0. 804389 | 0. 859566 |
| RAE1      | 20q13. 31  | -0. 018634528 | 0. 804453 | 0. 859589 |
| GTSF1     | 12q13. 13  | -0. 018629874 | 0. 804501 | 0. 859594 |
| CALML6    | 1p36. 33   | -0. 018615742 | 0. 804646 | 0. 859679 |
| BMP3      | 4q21. 21   | -0. 018613799 | 0. 804666 | 0. 859679 |
| PSG3      | 19q13. 2   | -0. 018577286 | 0. 805042 | 0. 860034 |
| AKR1D1    | 7q33       | -0. 01856649  | 0. 805153 | 0. 860107 |
| NME8      | 7p14. 1    | -0. 018558851 | 0. 805232 | 0. 860144 |
| ISYNA1    | 19p13. 11  | -0. 018542464 | 0. 8054   | 0. 860279 |
| TAF5L     | 1q42. 13   | -0. 018508987 | 0. 805744 | 0. 8606   |
| NFYA      | 6p21. 1    | 0. 018496433  | 0. 805874 | 0. 860692 |
| HSD3B2    | 1p12       | 0. 018485767  | 0. 805983 | 0. 860738 |
| UGP2      | 2p15       | -0. 018483878 | 0. 806003 | 0. 860738 |
| CALHM2    | 10q24. 33  | 0. 018477601  | 0. 806067 | 0. 860761 |
| SUPT20HL1 | Xp22. 11   | 0. 018467606  | 0. 80617  | 0. 860825 |
| ACTN3     | 11q13. 2   | -0. 018452857 | 0. 806322 | 0. 860941 |
| AAAS      | 12q13. 13  | -0. 018439939 | 0. 806455 | 0. 861037 |
| PPP1CB    | 2p23. 2    | 0. 018435754  | 0. 806498 | 0. 861037 |
| OR51M1    | 11p15. 4   | 0. 018429331  | 0. 806564 | 0. 861062 |
| UCHL5     | 1q31. 2    | -0. 018406461 | 0. 806799 | 0. 861221 |
| FH        | 1q43       | 0. 018402276  | 0. 806842 | 0. 861221 |
| HSFY1P1   | 22q11. 1   | 0. 018399422  | 0. 806872 | 0. 861221 |
| LINC00924 | 15q26. 2   | -0. 018398092 | 0. 806885 | 0. 861221 |
| AGAP7P    | 10q11. 22  | -0. 018393907 | 0. 806929 | 0. 861221 |
| FAM99A    | 11p15. 5   | -0. 018366532 | 0. 80721  | 0. 861435 |
| INS-IGF2  | 11p15. 5   | 0. 018365998  | 0. 807216 | 0. 861435 |
| FAM99B    | 11p15. 5   | 0. 018325904  | 0. 807628 | 0. 86183  |
| HEATR1    | 1q43       | 0. 01830812   | 0. 807811 | 0. 861956 |
| CEBPA     | 19q13. 11  | -0. 018306028 | 0. 807833 | 0. 861956 |
| FCF1      | 14q24. 3   | 0. 018257904  | 0. 808328 | 0. 862392 |
| UBLCP1    | 5q33. 3    | -0. 018257904 | 0. 808328 | 0. 862392 |
| YTHDF1    | 20q13. 33  | 0. 018253719  | 0. 808372 | 0. 862392 |
| SSX8P     | Xp11. 22   | -0. 018238628 | 0. 808527 | 0. 862512 |

|           |           |              |          |          |
|-----------|-----------|--------------|----------|----------|
| SNRNP35   | 12q24.31  | -0.018213964 | 0.808781 | 0.862737 |
| PCDHB13   | 5q31.3    | -0.018186764 | 0.809061 | 0.86299  |
| ITPRIPL2  | 16p12.3   | 0.018170025  | 0.809233 | 0.863128 |
| GHSR      | 3q26.31   | 0.018108549  | 0.809866 | 0.863757 |
| JMJD6     | 17q25.1   | 0.018075869  | 0.810203 | 0.86407  |
| SLC30A2   | 1p36.11   | -0.018065445 | 0.810311 | 0.864092 |
| ZBTB42    | 14q32.33  | -0.018065407 | 0.810311 | 0.864092 |
| ITGAM     | 16p11.2   | 0.018054945  | 0.810419 | 0.864161 |
| SSX4      | Xp11.23   | 0.018049557  | 0.810474 | 0.864174 |
| TMEM199   | 17q11.2   | -0.018025652 | 0.81072  | 0.864391 |
| DLX6-AS1  | 7q21.3    | 0.017998138  | 0.811004 | 0.864647 |
| CSNK2A2   | 16q21     | 0.01798799   | 0.811109 | 0.864712 |
| ROM1      | 11q12.3   | -0.01797962  | 0.811195 | 0.864758 |
| DSPP      | 4q22.1    | -0.017967581 | 0.811319 | 0.864844 |
| LOC100240 | 12q13.13  | -0.017953209 | 0.811467 | 0.864956 |
| COL5A2    | 2q32.2    | -0.017948235 | 0.811518 | 0.864964 |
| GSAP      | 7q11.23   | 0.017927312  | 0.811734 | 0.865125 |
| MOB3A     | 19p13.3   | -0.017925219 | 0.811755 | 0.865125 |
| ACO2      | 22q13.2   | -0.017918942 | 0.81182  | 0.865148 |
| RBMX2     | Xq26.1    | -0.017910573 | 0.811906 | 0.865194 |
| SASS6     | 1p21.2    | -0.017885464 | 0.812165 | 0.865354 |
| C19ORF44  | 19p13.11  | -0.017883372 | 0.812187 | 0.865354 |
| SPTLC1    | 9q22.31   | 0.017883372  | 0.812187 | 0.865354 |
| CETN1     | 18p11.32  | 0.017864736  | 0.812379 | 0.865513 |
| BANP      | 16q24.2   | -0.017831063 | 0.812726 | 0.865836 |
| FLJ42627  | 16p13.3   | 0.017791308  | 0.813136 | 0.866227 |
| B3GNT8    | 19q13.2   | 0.017768292  | 0.813373 | 0.866406 |
| LCE1B     | 1q21.3    | -0.017766543 | 0.813391 | 0.866406 |
| SLC35E1   | 19p13.11  | -0.017762015 | 0.813438 | 0.86641  |
| LGALS13   | 19q13.2   | 0.017697393  | 0.814104 | 0.867074 |
| OIP5-AS1  | 15q15.1   | -0.017688783 | 0.814193 | 0.867122 |
| LPXN      | 11q12.1   | -0.017632289 | 0.814776 | 0.867696 |
| LSP1      | 11p15.5   | 0.017621827  | 0.814884 | 0.867761 |
| KRTAP10-C | 21q22.3   | -0.017617935 | 0.814924 | 0.867761 |
| FZD10     | 12q24.33  | -0.017609273 | 0.815013 | 0.86781  |
| MICAL1    | 6q21      | -0.017561149 | 0.81551  | 0.868293 |
| ITGA5     | 12q13.13  | 0.017533948  | 0.81579  | 0.868499 |
| RBM4      | 11q13.2   | -0.017533948 | 0.81579  | 0.868499 |
| CD248     | 11q13.2   | -0.017521394 | 0.81592  | 0.868591 |
| OR5B2     | 11q12.1   | -0.017505778 | 0.816081 | 0.868716 |
| CCM2      | 7p13      | 0.017500471  | 0.816136 | 0.868728 |
| TIAM2     | 6q25.2-q2 | 0.017464901  | 0.816503 | 0.869052 |
| SNORA2C   | 12q13.11  | -0.017462523 | 0.816527 | 0.869052 |
| AGPAT1    | 6p21.32   | -0.01744607  | 0.816697 | 0.869187 |
| RFPL3S    | 22q12.3   | -0.017426219 | 0.816902 | 0.869359 |
| GEN1      | 2p24.2    | 0.017416777  | 0.817    | 0.869416 |
| TRIM27    | 6p22.1    | -0.017412592 | 0.817043 | 0.869416 |
| CRNN      | 1q21.3    | -0.017403481 | 0.817137 | 0.86947  |
| CCDC148   | 2q24.1    | -0.017374938 | 0.817432 | 0.869736 |
| FOXD4L6   | 9p11.2    | 0.017367592  | 0.817507 | 0.869736 |
| GUSB      | 7q11.21   | 0.01736656   | 0.817518 | 0.869736 |
| SNORA18   | 11q21     | 0.01733498   | 0.817844 | 0.870037 |
| NAPSB     | 19q13.33  | -0.017316352 | 0.818036 | 0.870195 |
| RMDN1     | 8q21.3    | 0.017253573  | 0.818685 | 0.870802 |

|           |           |              |          |          |
|-----------|-----------|--------------|----------|----------|
| LINC0020C | 10p15.3   | 0.01725266   | 0.818694 | 0.870802 |
| FNTB      | 14q23.3   | 0.017241019  | 0.818814 | 0.870884 |
| CHFR      | 12q24.33  | 0.01721591   | 0.819074 | 0.87109  |
| SPATA31D1 | 9q21.32   | -0.017213776 | 0.819096 | 0.87109  |
| LINC0243E | 4q32.1    | -0.017193038 | 0.81931  | 0.871272 |
| TMEM52B   | 12p13.2   | -0.017184525 | 0.819398 | 0.871319 |
| SLC2A7    | 1p36.23   | -0.01715738  | 0.819678 | 0.871571 |
| PGK2      | 6p12.3    | 0.017152999  | 0.819724 | 0.871572 |
| GCM2      | 6p24.2    | -0.017144728 | 0.819809 | 0.871617 |
| SNORA9    | 7p13      | 0.017129582  | 0.819966 | 0.871707 |
| ERGIC2    | 12p11.22  | 0.017128031  | 0.819982 | 0.871707 |
| OTOA      | 16p12.2 1 | 0.017123847  | 0.820025 | 0.871707 |
| ADAT2     | 6q24.2    | 0.017102923  | 0.820241 | 0.871848 |
| SNORA11B  | 14q32.11  | 0.017102532  | 0.820245 | 0.871848 |
| OPALIN    | 10q24.1   | -0.017084821 | 0.820428 | 0.871997 |
| CDKL4     | 2p22.1    | -0.017076242 | 0.820517 | 0.872044 |
| CNDP2     | 18q22.3   | -0.017071538 | 0.820565 | 0.87205  |
| GRAMD1C   | 3q13.31   | -0.016987843 | 0.82143  | 0.872922 |
| ATP5PB    | 1p13.2    | -0.016975289 | 0.82156  | 0.873013 |
| PPP1R2    | 3q29      | 0.016971105  | 0.821603 | 0.873013 |
| TUG1      | 22q12.2   | 0.016952273  | 0.821798 | 0.87315  |
| ABHD12    | 20p11.21  | 0.016948089  | 0.821841 | 0.87315  |
| RPS8      | 1p34.1    | 0.016945996  | 0.821863 | 0.87315  |
| TTC12     | 11q23.2   | -0.016941812 | 0.821906 | 0.87315  |
| LINC0002C | 20q13.33  | -0.016889783 | 0.822444 | 0.873675 |
| SHMT2     | 12q13.3   | -0.016872764 | 0.82262  | 0.873815 |
| PLEKHG4B  | 5p15.33   | 0.016866487  | 0.822685 | 0.873837 |
| TRMT10C   | 3q12.3    | 0.01685184   | 0.822836 | 0.873952 |
| ORMDL1    | 2q32.2    | -0.01681627  | 0.823204 | 0.874296 |
| ST7-OT3   | 7q31.2    | -0.016806721 | 0.823303 | 0.874355 |
| TC2N      | 14q32.12  | 0.016786977  | 0.823507 | 0.874525 |
| MYBPH     | 1q32.1    | -0.016741266 | 0.82398  | 0.87498  |
| BPIFA1    | 20q11.21  | -0.016729695 | 0.824099 | 0.875061 |
| PEAR1     | 1q23.1    | 0.016705375  | 0.824351 | 0.875251 |
| CBLL2     | Xp22.11   | -0.016703926 | 0.824366 | 0.875251 |
| MIXL1     | 1q42.12   | -0.016665594 | 0.824763 | 0.875602 |
| ZNF16     | 8q24.3    | 0.016663528  | 0.824784 | 0.875602 |
| SLC35A4   | 5q31.3    | -0.016648882 | 0.824935 | 0.875716 |
| PMS2P9    | 7q11.23   | -0.016640521 | 0.825022 | 0.875761 |
| LOC10012E | 9q22.31   | -0.01662463  | 0.825186 | 0.875889 |
| SLC01A2   | 12p12.1   | -0.016561028 | 0.825844 | 0.876542 |
| EXOC7     | 17q25.1   | 0.016533802  | 0.826126 | 0.876794 |
| NEUROG2   | 4q25      | 0.016492435  | 0.826554 | 0.877202 |
| RPL11     | 1p36.11   | -0.016468939 | 0.826798 | 0.877413 |
| VEPH1     | 3q25.31-c | 0.016443839  | 0.827057 | 0.877643 |
| CHAC2     | 2p16.2    | -0.016422916 | 0.827274 | 0.877826 |
| TP53      | 17p13.1   | -0.016404084 | 0.827469 | 0.877986 |
| ACTL9     | 19p13.2   | -0.016361616 | 0.827909 | 0.878406 |
| RBP2      | 3q23      | 0.016350649  | 0.828022 | 0.87848  |
| PEX2      | 8q21.13   | -0.016330843 | 0.828227 | 0.878651 |
| FOLH1B    | 11q14.3   | -0.016324659 | 0.828291 | 0.878672 |
| IFNA4     | 9p21.3    | -0.016302689 | 0.828519 | 0.878867 |
| REG1A     | 2p12      | -0.016282804 | 0.828725 | 0.878969 |
| SDHD      | 11q23.1   | -0.016282719 | 0.828726 | 0.878969 |

|           |           |              |          |          |
|-----------|-----------|--------------|----------|----------|
| NBPF4     | 1p13.3    | -0.016277176 | 0.828783 | 0.878969 |
| NFE2L2    | 2q31.2    | 0.016276442  | 0.828791 | 0.878969 |
| SRPX2     | Xq22.1    | 0.016268073  | 0.828877 | 0.879014 |
| GOT2      | 16q21     | 0.016261796  | 0.828942 | 0.879036 |
| REV1      | 2q11.2    | 0.016226226  | 0.829311 | 0.879357 |
| PLEKHB2   | 2q21.1    | 0.016224133  | 0.829333 | 0.879357 |
| EXTL1     | 1p36.11   | 0.01619484   | 0.829636 | 0.879632 |
| STX8      | 17p13.1   | -0.016182286 | 0.829766 | 0.879723 |
| AQP9      | 15q21.3   | 0.016157178  | 0.830026 | 0.879952 |
| UBALD1    | 16p13.3   | 0.016142531  | 0.830178 | 0.880042 |
| FABP5     | 8q21.13   | -0.016140439 | 0.8302   | 0.880042 |
| RHOXF1    | Xq24      | 0.016129861  | 0.830309 | 0.880112 |
| SUPT4H1   | 17q22     | -0.016113238 | 0.830482 | 0.880248 |
| 5-Mar     | 10q23.32- | -0.016079761 | 0.830828 | 0.880569 |
| PAGE1     | Xp11.23   | 0.016051529  | 0.831121 | 0.880832 |
| OAZ3      | 1q21.3    | -0.016040006 | 0.83124  | 0.880912 |
| MNX1      | 7q36.3    | -0.015998159 | 0.831674 | 0.881252 |
| DERL1     | 8q24.13   | -0.015987697 | 0.831783 | 0.881252 |
| ARHGEF28  | 5q13.2    | -0.015983512 | 0.831826 | 0.881252 |
| EP400P1   | 12q24.33  | -0.015983512 | 0.831826 | 0.881252 |
| HP        | 16q22.2   | 0.015983512  | 0.831826 | 0.881252 |
| MFAP1     | 15q15.3   | -0.015983512 | 0.831826 | 0.881252 |
| EVX2      | 2q31.1    | 0.015956111  | 0.83211  | 0.881455 |
| OR7G2     | 19p13.2   | 0.015956111  | 0.83211  | 0.881455 |
| SBF1P1    | 8q12.1    | 0.015949635  | 0.832177 | 0.881455 |
| SLC35F5   | 2q14.1    | -0.015939573 | 0.832282 | 0.881455 |
| TEKT4     | 2q11.1    | -0.015939573 | 0.832282 | 0.881455 |
| ZNF143    | 11p15.4   | -0.015939573 | 0.832282 | 0.881455 |
| PNMA5     | Xq28      | 0.015931361  | 0.832367 | 0.881498 |
| ITPRID1   | 7p14.3    | 0.015919985  | 0.832485 | 0.881576 |
| NRAS      | 1p13.2    | -0.015906095 | 0.832629 | 0.881682 |
| RAI1      | 17p11.2   | -0.015843324 | 0.833279 | 0.882324 |
| RHOBTB1   | 10q21.2   | 0.015832863  | 0.833388 | 0.882393 |
| NAPSA     | 19q13.33  | -0.015825548 | 0.833464 | 0.882426 |
| SLC26A10  | 12q13.3   | 0.015820308  | 0.833518 | 0.882437 |
| TMEM9     | 1q32.1    | -0.015799385 | 0.833735 | 0.882576 |
| GTSF1L    | 20q13.12  | -0.015799123 | 0.833738 | 0.882576 |
| GABARAPL2 | 16q23.1   | -0.015774277 | 0.833996 | 0.882802 |
| WDR41     | 5q13.3-q1 | -0.015765907 | 0.834082 | 0.882846 |
| MRPL19    | 2p12      | -0.015761722 | 0.834126 | 0.882846 |
| ACIN1     | 14q11.2   | 0.015747076  | 0.834278 | 0.88296  |
| AKNAD1    | 1p13.3    | -0.015723941 | 0.834518 | 0.883168 |
| HNF1A     | 12q24.31  | -0.015682213 | 0.834951 | 0.883533 |
| KRT74     | 12q13.13  | 0.015682104  | 0.834952 | 0.883533 |
| KY        | 3q22.2    | 0.015675936  | 0.835016 | 0.883554 |
| MRM2      | 7p22.3    | -0.015667566 | 0.835102 | 0.883599 |
| SLC25A20  | 3p21.31   | -0.01564455  | 0.835341 | 0.883805 |
| GLRA4     | Xq22.2    | -0.015632311 | 0.835468 | 0.883893 |
| CFHR5     | 1q31.3    | 0.015595913  | 0.835846 | 0.884246 |
| TRIML2    | 4q35.2    | -0.015589068 | 0.835917 | 0.884274 |
| CUEDC2    | 10q24.32  | 0.015583872  | 0.835971 | 0.884284 |
| TUBA8     | 22q11.21  | -0.015571318 | 0.836101 | 0.884375 |
| ZSCAN10   | 16p13.3   | 0.015550749  | 0.836315 | 0.884554 |
| ZNF44     | 19p13.2   | -0.015508547 | 0.836753 | 0.884971 |

|           |           |              |          |          |
|-----------|-----------|--------------|----------|----------|
| FAM118A   | 22q13.31  | -0.0154667   | 0.837187 | 0.885383 |
| NHLRC3    | 13q13.3   | 0.015458331  | 0.837274 | 0.885428 |
| LINC01548 | 21q22.11  | -0.015453583 | 0.837323 | 0.885434 |
| NBR1      | 17q21.31  | 0.015447869  | 0.837383 | 0.885449 |
| TFE3      | Xp11.23   | -0.015422761 | 0.837643 | 0.885678 |
| CST11     | 20p11.21  | -0.0154001   | 0.837878 | 0.88588  |
| ZNF468    | 19q13.41  | -0.015383006 | 0.838056 | 0.886021 |
| EXOSC2    | 9q34.12   | 0.015372544  | 0.838165 | 0.886089 |
| FAM9A     | Xp22.31   | -0.015360321 | 0.838291 | 0.886176 |
| DNMT3L    | 21q22.3   | -0.01534577  | 0.838443 | 0.886289 |
| ULK4P3    | 15q13.2   | 0.015333844  | 0.838566 | 0.886373 |
| ATP6V1H   | 8q11.23   | 0.015318143  | 0.838729 | 0.886498 |
| HPYR1     | 8q24.22   | -0.015302822 | 0.838889 | 0.88662  |
| FAM90A7P  | 8p23.1    | 0.015290689  | 0.839015 | 0.886706 |
| HAUS4     | 14q11.2   | 0.015270019  | 0.839229 | 0.886886 |
| CA1       | 8q21.2    | -0.015255825 | 0.839377 | 0.886995 |
| C9ORF24   | 9p13.3    | 0.015192601  | 0.840033 | 0.887642 |
| YPEL4     | 11q12.1   | -0.01518214  | 0.840142 | 0.88771  |
| MOB1A     | 2p13.1    | -0.015165401 | 0.840316 | 0.887847 |
| STAG3L1   | 7q11.23   | -0.015152847 | 0.840446 | 0.887938 |
| DLX6      | 7q21.3    | -0.015090841 | 0.841091 | 0.888533 |
| HSP90AA1  | 14q32.31  | 0.015090076  | 0.841099 | 0.888533 |
| GLMN      | 1p22.1    | -0.015073337 | 0.841273 | 0.888669 |
| WDHD1     | 14q22.2-c | 0.015062875  | 0.841381 | 0.888735 |
| NAT8B     | 2p13.1    | -0.015056222 | 0.84145  | 0.888735 |
| DEAF1     | 11p15.5   | -0.015054506 | 0.841468 | 0.888735 |
| NLRP13    | 19q13.43  | 0.015044974  | 0.841567 | 0.888793 |
| OR10T2    | 1q23.1    | -0.014997655 | 0.842059 | 0.889252 |
| BTN1A1    | 6p22.2    | -0.01499461  | 0.842091 | 0.889252 |
| SLC1A6    | 19p13.12  | -0.014983863 | 0.842202 | 0.889323 |
| TARBP1    | 1q42.2    | 0.014977089  | 0.842273 | 0.889348 |
| DES       | 2q35      | 0.014972904  | 0.842316 | 0.889348 |
| MCRIP1    | 17q25.3   | 0.014968719  | 0.84236  | 0.889348 |
| NUDT16    | 3q22.1    | -0.014939426 | 0.842664 | 0.889567 |
| ZNF26     | 12q24.33  | -0.014939426 | 0.842664 | 0.889567 |
| MAGEA2    | Xq28      | 0.014935894  | 0.842701 | 0.889567 |
| THOP1     | 19p13.3   | -0.014931057 | 0.842751 | 0.889573 |
| DHRS7B    | 17p11.2   | -0.014899672 | 0.843078 | 0.889847 |
| BCAR4     | 16p13.13  | -0.01489759  | 0.843099 | 0.889847 |
| PPEF2     | 4q21.1    | 0.01488199   | 0.843261 | 0.889925 |
| PRSS45P   | 3p21.31   | 0.014881839  | 0.843263 | 0.889925 |
| IL25      | 14q11.2   | 0.014873671  | 0.843348 | 0.889968 |
| INPP5F    | 10q26.11  | -0.014849455 | 0.8436   | 0.890187 |
| FOXD3     | 1p31.3    | -0.014837634 | 0.843723 | 0.890269 |
| GTPBP8    | 3q13.2    | 0.014829585  | 0.843806 | 0.890298 |
| MPI       | 15q24.1   | 0.014826439  | 0.843839 | 0.890298 |
| NF1P2     | 15q11.2   | 0.014797101  | 0.844144 | 0.890573 |
| CEBPZ     | 2p22.2    | -0.01477413  | 0.844383 | 0.890744 |
| FAM66D    | 8p23.1    | -0.014772965 | 0.844395 | 0.890744 |
| CLDN20    | 6q25.3    | -0.01476794  | 0.844447 | 0.890752 |
| CCNQ      | Xq28      | 0.014763668  | 0.844492 | 0.890752 |
| YWHAG     | 7q11.23   | 0.014755299  | 0.844579 | 0.890797 |
| OPN4      | 10q23.2   | 0.014736803  | 0.844771 | 0.890953 |
| GAL       | 11q13.2   | -0.014715975 | 0.844988 | 0.891115 |

|           |           |              |          |          |
|-----------|-----------|--------------|----------|----------|
| TPGS1     | 19p13.3   | 0.014713452  | 0.845014 | 0.891115 |
| HOXA4     | 7p15.2    | 0.014707175  | 0.845079 | 0.891135 |
| POLR2K    | 8q22.2    | -0.01470299  | 0.845123 | 0.891135 |
| LOC283922 | 16q23.1   | -0.014690436 | 0.845253 | 0.891226 |
| 7-Mar     | 2q24.2    | -0.014684159 | 0.845319 | 0.891248 |
| NROB2     | 1p36.11   | -0.014671635 | 0.845449 | 0.891338 |
| WDR64     | 1q43      | 0.014653876  | 0.845634 | 0.891461 |
| SNORD17   | 20p11.23  | 0.014651832  | 0.845655 | 0.891461 |
| PIGV      | 1p36.11   | -0.014644404 | 0.845732 | 0.891496 |
| CDK2AP1   | 12q24.31  | 0.014633942  | 0.845841 | 0.891539 |
| SLC12A6   | 15q14     | -0.01463185  | 0.845863 | 0.891539 |
| RBM6      | 3p21.31   | -0.014621388 | 0.845972 | 0.891583 |
| GCA       | 2q24.2    | 0.014619296  | 0.845993 | 0.891583 |
| TPTEP2    | 22q13.1   | 0.014585818  | 0.846342 | 0.891903 |
| SERPIN1   | 18q22.1   | 0.014525682  | 0.846968 | 0.892515 |
| DDX28     | 16q22.1   | -0.014512586 | 0.847104 | 0.892569 |
| FMR1-AS1  | Xq27.3    | 0.014512181  | 0.847108 | 0.892569 |
| MME       | 3q25.2    | 0.014504216  | 0.847191 | 0.89261  |
| BAG6      | 6p21.33   | 0.014491662  | 0.847322 | 0.892699 |
| NAGK      | 2p13.3    | -0.014487477 | 0.847365 | 0.892699 |
| LIMS3-LOC | 2q13      | -0.014458184 | 0.84767  | 0.892973 |
| WFIKKN2   | 17q21.33  | 0.014450079  | 0.847754 | 0.893015 |
| CNIH1     | 14q22.2   | -0.014433076 | 0.847931 | 0.893154 |
| LEAP2     | 5q31.1    | -0.014422614 | 0.84804  | 0.893222 |
| TNFRSF13C | 22q13.2   | -0.014416986 | 0.848099 | 0.893237 |
| TTYH1     | 19q13.42  | -0.014399598 | 0.84828  | 0.893355 |
| ANGPT4    | 20p13     | 0.014397582  | 0.848301 | 0.893355 |
| TXNDC11   | 16p13.13  | 0.014391229  | 0.848367 | 0.893378 |
| BRD4      | 19p13.12  | 0.014376582  | 0.848519 | 0.893491 |
| USP10     | 16q24.1   | 0.014341012  | 0.84889  | 0.893834 |
| AKR1C8P   | 10p15.1   | 0.014336569  | 0.848936 | 0.893836 |
| PPP1R13B  | 14q32.33  | -0.014326366 | 0.849042 | 0.893853 |
| TMEM140   | 7q33      | 0.014326366  | 0.849042 | 0.893853 |
| SFSWAP    | 12q24.33  | 0.014317996  | 0.849129 | 0.893898 |
| EMD       | Xq28      | 0.014311719  | 0.849195 | 0.89392  |
| ADAD2     | 16q24.1   | -0.014304329 | 0.849272 | 0.893954 |
| PRSS38    | 1q42.13   | 0.014297686  | 0.849341 | 0.893979 |
| S1PR5     | 19p13.2   | 0.014284519  | 0.849478 | 0.894065 |
| CD300LD   | 17q25.1   | 0.014281262  | 0.849512 | 0.894065 |
| TMEM203   | 9q34.3    | 0.014276149  | 0.849565 | 0.894074 |
| ATR       | 3q23      | 0.014257318  | 0.849761 | 0.894233 |
| C10ORF67  | 10p12.2   | -0.014233156 | 0.850013 | 0.894451 |
| SSBP4     | 19p13.11  | 0.014225933  | 0.850088 | 0.894483 |
| RFT1      | 3p21.1    | -0.014186178 | 0.850502 | 0.894872 |
| C5ORF15   | 5q31.1    | -0.014177808 | 0.850589 | 0.894916 |
| ATP6V1C2  | -         | 0.014154793  | 0.850829 | 0.89512  |
| BTG3      | 21q21.1   | 0.014150608  | 0.850873 | 0.89512  |
| HOXC10    | 12q13.13  | 0.014142262  | 0.850959 | 0.895165 |
| MRNIP     | 5q35.3    | -0.014135961 | 0.851025 | 0.895183 |
| CHST3     | 10q22.1   | 0.014131777  | 0.851069 | 0.895183 |
| VPS26C    | 21q22.13  | -0.014123407 | 0.851156 | 0.895183 |
| PRRC2C    | 1q24.3    | -0.014123407 | 0.851156 | 0.895183 |
| WDR38     | 9q33.3    | 0.014118105  | 0.851211 | 0.895194 |
| GUCY2F    | Xq22.3-q2 | -0.014086902 | 0.851536 | 0.895488 |



|           |          |              |          |          |
|-----------|----------|--------------|----------|----------|
| GID8      | 20q13.33 | -0.014062729 | 0.851788 | 0.895682 |
| ADGRB2    | 1p35.2   | 0.014060636  | 0.85181  | 0.895682 |
| NUB1      | 7q36.1   | -0.014052267 | 0.851897 | 0.895726 |
| KCNMB1    | 5q35.1   | -0.014035528 | 0.852071 | 0.895863 |
| PIGZ      | 3q29     | 0.014025066  | 0.85218  | 0.89593  |
| SKA2      | 17q22    | -0.01401042  | 0.852333 | 0.896043 |
| WARS2     | 1p12     | -0.014002051 | 0.85242  | 0.896088 |
| LOC646999 | 7p14.1   | 0.013987411  | 0.852573 | 0.896201 |
| EHBP1     | 2p15     | 0.013972758  | 0.852725 | 0.896315 |
| NLRP9     | 19q13.42 | -0.01395942  | 0.852864 | 0.896414 |
| ISX       | 22q12.3  | -0.013945652 | 0.853008 | 0.896482 |
| LRTM2     | 12p13.33 | -0.013944541 | 0.853019 | 0.896482 |
| KIF24     | 9p13.3   | -0.013922541 | 0.853249 | 0.896676 |
| RRP15     | 1q41     | 0.013909987  | 0.85338  | 0.896742 |
| ZNF517    | 8q24.3   | -0.013907894 | 0.853401 | 0.896742 |
| GPC2      | 7q22.1   | 0.01389534   | 0.853532 | 0.896833 |
| EGR2      | 10q21.3  | -0.013884879 | 0.853641 | 0.896866 |
| DDX43     | 6q13     | -0.013879473 | 0.853698 | 0.896866 |
| OR2H2     | 6p22.1   | -0.013879338 | 0.853699 | 0.896866 |
| WFDC1     | 16q24.1  | -0.013857678 | 0.853925 | 0.897031 |
| SKOR1     | 15q23    | -0.013855586 | 0.853947 | 0.897031 |
| ZNF702P   | 19q13.41 | -0.013851401 | 0.85399  | 0.897031 |
| RHBG      | 1q22     | 0.013825947  | 0.854256 | 0.897262 |
| ZNF138    | 7q11.21  | 0.013815831  | 0.854361 | 0.897326 |
| MUC15     | 11p14.2  | 0.013805229  | 0.854472 | 0.897378 |
| SLC6A11   | 3p25.3   | 0.013802467  | 0.8545   | 0.897378 |
| TAFA5     | 22q13.32 | 0.013769799  | 0.854841 | 0.897655 |
| RPL29P2   | 17p13.1  | -0.013768537 | 0.854854 | 0.897655 |
| TNFAIP8L1 | 19p13.3  | 0.013757245  | 0.854972 | 0.897707 |
| TRAPPC6B  | 14q21.1  | 0.013755152  | 0.854994 | 0.897707 |
| SOST      | 17q21.31 | -0.013710334 | 0.855461 | 0.89814  |
| ERI1      | 8p23.1   | -0.013707028 | 0.855495 | 0.89814  |
| WEE1      | 11p15.4  | -0.013698659 | 0.855583 | 0.898184 |
| PXYLP1    | 3q23     | -0.013673551 | 0.855844 | 0.898412 |
| EPO       | 7q22.1   | -0.013664087 | 0.855943 | 0.898468 |
| HEXD      | 17q25.3  | -0.013654719 | 0.856041 | 0.898524 |
| TERB2     | 15q21.1  | 0.013644162  | 0.856151 | 0.898542 |
| TUBA1B    | 12q13.12 | 0.013642165  | 0.856172 | 0.898542 |
| ALKBH3    | 11p11.2  | -0.013640073 | 0.856194 | 0.898542 |
| ATP5MGL   | 22q13.2  | 0.013596028  | 0.856653 | 0.898977 |
| MYCL      | 1p34.2   | 0.013581487  | 0.856805 | 0.899089 |
| C10RF141  | 1p31.3   | -0.013541731 | 0.857219 | 0.899477 |
| NELFCD    | 20q13.32 | -0.013489423 | 0.857765 | 0.900003 |
| ACSBG1    | 15q25.1  | 0.013476869  | 0.857896 | 0.900093 |
| FANCF     | 11p14.3  | -0.013464315 | 0.858027 | 0.900183 |
| KCNH4     | 17q21.2  | 0.013418311  | 0.858507 | 0.900639 |
| MKRN1     | 7q34     | -0.013407821 | 0.858616 | 0.900705 |
| TCN2      | 22q12.2  | 0.013403637  | 0.85866  | 0.900705 |
| ALOX12B   | 17p13.1  | 0.013391328  | 0.858789 | 0.900793 |
| TRIM13    | 13q14.2  | -0.013359697 | 0.859119 | 0.901092 |
| MAGEC2    | Xq27.2   | 0.013347179  | 0.859249 | 0.901156 |
| KMT2B     | 19q13.12 | 0.013345051  | 0.859271 | 0.901156 |
| GTPBP6    | Xp22.33  | -0.013340866 | 0.859315 | 0.901156 |
| NABP2     | 12q13.3  | 0.013292742  | 0.859817 | 0.901611 |

|           |           |              |          |          |
|-----------|-----------|--------------|----------|----------|
| TSPAN9    | 12p13.33- | 0.013290649  | 0.859839 | 0.901611 |
| EPHB2     | 1p36.12   | 0.01324671   | 0.860298 | 0.902045 |
| PSME4     | 2p16.2    | -0.013240433 | 0.860363 | 0.902066 |
| SEPTIN7P9 | 10p11.1   | -0.013212168 | 0.860658 | 0.902328 |
| KCNE5     | Xq23      | 0.013200678  | 0.860778 | 0.902382 |
| PTAFR     | 1p35.3    | -0.013198586 | 0.8608   | 0.902382 |
| MROH9     | 1q24.3    | -0.013193337 | 0.860855 | 0.902392 |
| MFSD14C   | 9q22.33   | 0.013153607  | 0.86127  | 0.90278  |
| TTY6      | Yq11.223  | -0.013141923 | 0.861392 | 0.90286  |
| ACE       | 17q23.3   | 0.013129538  | 0.861521 | 0.902948 |
| HCAR3     | 12q24.31  | 0.013116991  | 0.861652 | 0.903038 |
| SERPINC1  | 1q25.1    | -0.013063982 | 0.862206 | 0.903552 |
| AKAP14    | Xq24      | -0.0130601   | 0.862246 | 0.903552 |
| IFNA10    | 9p21.3    | 0.013055     | 0.8623   | 0.903552 |
| PTH1R     | 3p21.31   | -0.013050028 | 0.862351 | 0.903552 |
| HTR2C     | Xq23      | 0.013048389  | 0.862369 | 0.903552 |
| TAS2R5    | 7q34      | 0.013041795  | 0.862437 | 0.903577 |
| SNHG6     | 8q13.1 8c | -0.012987258 | 0.863007 | 0.904126 |
| KLRG2     | 7q34      | -0.012978698 | 0.863096 | 0.904173 |
| KLHL12    | 1q32.1    | -0.012966334 | 0.863226 | 0.90426  |
| OR6B2     | 2q37.3    | 0.012958979  | 0.863302 | 0.904294 |
| CPLX1     | 4p16.3    | -0.012893102 | 0.863991 | 0.904942 |
| KLF3-AS1  | 4p14      | -0.012891016 | 0.864012 | 0.904942 |
| NUDT2     | 9p13.3    | 0.012876363  | 0.864165 | 0.905055 |
| SMPD2     | 6q21      | -0.012851254 | 0.864428 | 0.905283 |
| GOT1L1    | 8p11.23   | -0.012846659 | 0.864476 | 0.905285 |
| NDUFB8    | 10q24.31  | 0.012830331  | 0.864646 | 0.905417 |
| GGNBP1    | 6p21.31   | 0.012818077  | 0.864774 | 0.905459 |
| NCMAP     | 1p36.11   | 0.012817777  | 0.864778 | 0.905459 |
| SETD1A    | 16p11.2   | 0.012792668  | 0.86504  | 0.905686 |
| AADACP1   | 3q25.1    | 0.012784332  | 0.865127 | 0.90573  |
| SNORD22   | 11q12.3   | 0.012774347  | 0.865231 | 0.905792 |
| DPAGT1    | 11q23.3   | 0.012765468  | 0.865324 | 0.905842 |
| CENPL     | 1q25.1    | 0.012758151  | 0.865401 | 0.905874 |
| LRSAM1    | 9q33.3-q5 | 0.012727805  | 0.865718 | 0.906159 |
| B3GALT6   | 1p36.33   | -0.012711066 | 0.865893 | 0.906265 |
| IFNA14    | 9p21.3    | 0.012709411  | 0.86591  | 0.906265 |
| TMC1      | 9q21.13   | -0.012697814 | 0.866031 | 0.906344 |
| SPIDR     | 8q11.21   | 0.012681773  | 0.866199 | 0.906464 |
| GLIS3-AS1 | 19p24.2   | -0.01267823  | 0.866236 | 0.906464 |
| STX18     | 4p16.3-p1 | 0.012669219  | 0.86633  | 0.906515 |
| MYO1H     | 12q24.11  | -0.012659945 | 0.866427 | 0.906569 |
| METTL8    | 2q31.1    | 0.012635742  | 0.86668  | 0.906786 |
| C12ORF54  | 12q13.11  | -0.012624153 | 0.866801 | 0.906865 |
| OR1A1     | 17p13.3   | -0.012607224 | 0.866978 | 0.906939 |
| OR5A1     | 11q12.1   | -0.012607224 | 0.866978 | 0.906939 |
| ZBTB32    | 19q13.12  | -0.012604356 | 0.867008 | 0.906939 |
| PRSS42P   | 3p21.31   | -0.012549564 | 0.867581 | 0.90746  |
| SCIN      | 7p21.3    | -0.012547863 | 0.867599 | 0.90746  |
| MLST8     | 16p13.3   | 0.012543678  | 0.867642 | 0.90746  |
| SLC5A6    | 2p23.3    | 0.012524847  | 0.867839 | 0.907619 |
| ZDHHC18   | 1p36.11   | -0.012501831 | 0.86808  | 0.907772 |
| ASB18     | 2q37.2    | -0.012497955 | 0.868121 | 0.907772 |
| SPEM2     | 17p13.1   | 0.012497791  | 0.868122 | 0.907772 |

|           |           |              |          |          |
|-----------|-----------|--------------|----------|----------|
| PDZD8     | 10q25.3-c | -0.012483    | 0.868277 | 0.907887 |
| OR5C1     | 9q33.2    | 0.012476782  | 0.868342 | 0.907907 |
| TMIGD2    | 19p13.3   | -0.012459997 | 0.868517 | 0.907983 |
| C3ORF84   | 3p21.31   | -0.01245864  | 0.868532 | 0.907983 |
| LIPN      | 10q23.31  | -0.012456838 | 0.86855  | 0.907983 |
| LIM2      | 19q13.41  | -0.01243602  | 0.868768 | 0.908126 |
| WNT3      | 17q21.31- | -0.012434875 | 0.86878  | 0.908126 |
| KIF4B     | 5q33.2    | 0.012430691  | 0.868824 | 0.908126 |
| COX15     | 10q24.2   | 0.012344904  | 0.869721 | 0.909016 |
| DDX18     | 2q14.1    | 0.012321888  | 0.869962 | 0.90922  |
| MTERF1    | 7q21.2    | -0.01228841  | 0.870312 | 0.909539 |
| ACAD11    | 3q22.1    | 0.012277949  | 0.870422 | 0.909606 |
| BCORL1    | Xq26.1    | 0.012267487  | 0.870531 | 0.909671 |
| DNA2      | 10q21.3   | -0.012263302 | 0.870575 | 0.909671 |
| GAGE12J   | Xp11.23   | -0.012220348 | 0.871024 | 0.910092 |
| GTF2E1    | 3q13.33   | -0.012206809 | 0.871166 | 0.910193 |
| PDCL3     | 2q11.2    | -0.012200531 | 0.871231 | 0.910212 |
| COX7A2    | 6q14.1    | 0.012196347  | 0.871275 | 0.910212 |
| CXXC5     | 5q31.2    | -0.012183793 | 0.871407 | 0.910302 |
| YPEL5     | 2p23.1    | 0.012177516  | 0.871472 | 0.910323 |
| HERC3     | 4q22.1    | -0.012158684 | 0.871669 | 0.910481 |
| TIAL1     | 10q26.11  | 0.012108468  | 0.872195 | 0.910979 |
| DHDDS     | 1p36.11   | -0.012100098 | 0.872282 | 0.910979 |
| ETAA1     | 2p14      | -0.012100098 | 0.872282 | 0.910979 |
| SLC38A9   | 5q11.2    | 0.012085458  | 0.872436 | 0.911091 |
| P4HA3     | 11q13.4   | 0.012060344  | 0.872698 | 0.911318 |
| LINC0156E | 3q21.3    | 0.012051888  | 0.872787 | 0.911363 |
| ZNF785    | 16p11.2   | -0.012045697 | 0.872852 | 0.911383 |
| OR2T11    | 1q44      | -0.012030584 | 0.87301  | 0.911493 |
| DGAT2     | 11q13.5   | -0.012026866 | 0.873049 | 0.911493 |
| CEACAM16  | 19q13.31- | -0.012008682 | 0.873239 | 0.911644 |
| VCAN      | 5q14.2-q1 | -0.011970372 | 0.87364  | 0.912015 |
| TFAP4     | 16p13.3   | 0.011962003  | 0.873728 | 0.912059 |
| FAM149A   | 4q35.1    | 0.011934802  | 0.874013 | 0.912255 |
| IL12B     | 5q33.3    | 0.01193221   | 0.87404  | 0.912255 |
| PRAMEF16  | 1p36.21   | -0.011929169 | 0.874072 | 0.912255 |
| FLYWCH2   | 16p13.3   | -0.011922248 | 0.874144 | 0.912255 |
| LOXL3     | 2p13.1    | -0.011922248 | 0.874144 | 0.912255 |
| ADRA1B    | 5q33.3    | 0.011901324  | 0.874363 | 0.912434 |
| DCTN2     | 12q13.3   | 0.01189714   | 0.874407 | 0.912434 |
| MRPS7     | 17q25.1   | 0.011890863  | 0.874473 | 0.912455 |
| NDUFAF2   | 5q12.1    | 0.011869939  | 0.874692 | 0.912589 |
| RNF112    | 17p11.2   | 0.011869939  | 0.874692 | 0.912589 |
| PICALM    | 11q14.2   | -0.011863662 | 0.874757 | 0.91261  |
| MIR155HG  | -         | 0.011805076  | 0.875371 | 0.913202 |
| PXMP2     | 12q24.33  | 0.011796707  | 0.875458 | 0.913244 |
| TOX4      | 14q11.2   | 0.011792522  | 0.875502 | 0.913244 |
| FOXG1     | 14q12     | -0.011773073 | 0.875706 | 0.913409 |
| GOLGB1    | 3q13.33   | 0.011761137  | 0.875831 | 0.913467 |
| SRSF11    | 1p31.1    | -0.011759044 | 0.875853 | 0.913467 |
| GOLGA8G   | 15q13.1   | 0.011742849  | 0.876023 | 0.913596 |
| MEGF10    | 5q23.2    | 0.011713012  | 0.876335 | 0.913826 |
| PLOD2     | 3q24      | -0.011713012 | 0.876335 | 0.913826 |
| CLEC1B    | 12p13.31- | 0.011702398  | 0.876446 | 0.913895 |

|          |          |              |          |          |
|----------|----------|--------------|----------|----------|
| TMEM151A | 11q13.2  | 0.011666981  | 0.876817 | 0.914234 |
| ALX1     | 12q21.31 | 0.011662558  | 0.876863 | 0.914234 |
| SLC3A2   | 11q12.3  | -0.011650242 | 0.876992 | 0.914298 |
| FBN3     | 19p13.2  | 0.011648005  | 0.877016 | 0.914298 |
| KRT76    | 12q13.13 | 0.011637759  | 0.877123 | 0.914362 |
| PWWP3A   | 19p13.3  | -0.011606302 | 0.877453 | 0.914583 |
| GPHB5    | 14q23.2  | -0.011604444 | 0.877472 | 0.914583 |
| TSPY3    | Yp11.2   | 0.011604444  | 0.877472 | 0.914583 |
| DNAJC5B  | 8q13.1   | -0.011579108 | 0.877738 | 0.914812 |
| KHSRP    | 19p13.3  | -0.01156864  | 0.877847 | 0.914878 |
| RBP1     | 3q23     | 0.011545624  | 0.878088 | 0.915082 |
| SLC25A15 | 13q14.11 | -0.011539347 | 0.878154 | 0.915085 |
| OR5P3    | 11p15.4  | -0.011536565 | 0.878183 | 0.915085 |
| DENND1B  | 1q31.3   | -0.0114975   | 0.878593 | 0.915464 |
| SP9      | 2q31.1   | -0.011487177 | 0.878701 | 0.915529 |
| CMAS     | 12p12.1  | 0.011482853  | 0.878746 | 0.915529 |
| PSG1     | 19q13.2  | -0.011474047 | 0.878838 | 0.915553 |
| COX20    | 1q44     | 0.011468207  | 0.8789   | 0.915553 |
| COLEC10  | 8q24.12  | 0.011467508  | 0.878907 | 0.915553 |
| TXNRD2   | 22q11.21 | -0.011422181 | 0.879382 | 0.916    |
| SOX8     | 16p13.3  | 0.011401251  | 0.879601 | 0.916137 |
| SFTPA1   | 10q22.3  | 0.011400889  | 0.879605 | 0.916137 |
| RRP12    | 10q24.1  | 0.011388697  | 0.879733 | 0.916175 |
| SLC39A7  | 6p21.32  | 0.011388697  | 0.879733 | 0.916175 |
| SPDYE6   | 7q22.1   | -0.011369866 | 0.87993  | 0.91633  |
| SGF29    | 16p11.2  | -0.011365681 | 0.879974 | 0.91633  |
| KRTAP3-1 | 17q21.2  | 0.011361375  | 0.880019 | 0.91633  |
| SLC12A2  | 5q23.3   | -0.011332203 | 0.880325 | 0.9166   |
| RALGPS2  | 1q25.2   | 0.011317557  | 0.880479 | 0.916712 |
| NABP1    | 2q32.3   | 0.011296633  | 0.880698 | 0.916891 |
| LEMD2    | 6p21.31  | 0.011292449  | 0.880742 | 0.916891 |
| OR4A16   | 11q11    | -0.011285592 | 0.880814 | 0.916918 |
| PARP15   | 3q21.1   | -0.011269433 | 0.880983 | 0.917046 |
| EGFR     | 7p11.2   | 0.011246417  | 0.881224 | 0.917218 |
| PRAMEF2  | 1p36.21  | -0.011244913 | 0.88124  | 0.917218 |
| DDX1     | 2p24.3   | 0.011206662  | 0.881641 | 0.917588 |
| SLC17A6  | 11p14.3  | 0.011196685  | 0.881746 | 0.917649 |
| NAMPT    | 7q22.3   | -0.011156446 | 0.882168 | 0.91804  |
| SFXN4    | 10q26.11 | 0.011150168  | 0.882233 | 0.918061 |
| ATG3     | 3q13.2   | 0.01113343   | 0.882409 | 0.918196 |
| CHPF2    | 7q36.1   | 0.011127153  | 0.882475 | 0.918217 |
| KLK1     | 19q13.33 | 0.011112529  | 0.882628 | 0.918296 |
| FAM238A  | 10p12.1  | 0.011111139  | 0.882643 | 0.918296 |
| FAHD2A   | 2q11.1   | -0.011026719 | 0.883528 | 0.919169 |
| C12ORF40 | 12q12    | 0.011010752  | 0.883695 | 0.919295 |
| TMBIM4   | 12q14.3  | -0.01098278  | 0.883989 | 0.919553 |
| FRG2     | 4q35.2   | 0.010971313  | 0.884109 | 0.91963  |
| PPIAL4E  | 1q21.1   | -0.010963827 | 0.884188 | 0.919664 |
| GSTM3    | 1p13.3   | -0.010924194 | 0.884603 | 0.920048 |
| HMGCR    | 5q13.3   | -0.010901178 | 0.884845 | 0.920226 |
| TNFAIP8  | 5q23.1   | 0.010899086  | 0.884867 | 0.920226 |
| AQR      | 15q14    | -0.010882347 | 0.885042 | 0.920361 |
| CYP4F29P | 21q11.2  | 0.01085954   | 0.885282 | 0.920516 |
| SET      | 9q34.11  | 0.010859331  | 0.885284 | 0.920516 |

|            |          |              |          |          |
|------------|----------|--------------|----------|----------|
| OTP        | 5q14.1   | 0.01084461   | 0.885438 | 0.920629 |
| ZNF295-AS2 | 21q22.3  | 0.010837086  | 0.885517 | 0.920663 |
| ISM2       | 14q24.3  | 0.010819883  | 0.885698 | 0.920803 |
| NLRC5      | 16q13    | 0.010811207  | 0.885789 | 0.92085  |
| ZNF428     | 19q13.31 | 0.010792375  | 0.885986 | 0.921007 |
| SNORA6     | 3p22.1   | -0.010780094 | 0.886115 | 0.921093 |
| ARMH1      | 1p34.1   | 0.01076936   | 0.886228 | 0.921163 |
| YBX1       | 1p34.2   | -0.01076099  | 0.886316 | 0.921206 |
| BAP1       | 3p21.1   | -0.010754713 | 0.886382 | 0.92121  |
| TAS2R3     | 7q34     | -0.010751868 | 0.886411 | 0.92121  |
| BCORP1     | Yq11.222 | 0.010732556  | 0.886614 | 0.921372 |
| UQCRFS1    | 19q12    | -0.01072542  | 0.886689 | 0.921402 |
| OR52D1     | 11p15.4  | 0.010714334  | 0.886805 | 0.921475 |
| HAVCR1P1   | 19p12    | 0.010690907  | 0.887051 | 0.921683 |
| CCT6A      | 7p11.2   | 0.010681481  | 0.88715  | 0.92169  |
| PDGFA      | 7p22.3   | 0.010681481  | 0.88715  | 0.92169  |
| HSD3B1     | 1p12     | 0.010653647  | 0.887442 | 0.921936 |
| ZFP91      | 11q12.1  | -0.010650095 | 0.887479 | 0.921936 |
| COPSS      | 2q37.3   | 0.010643818  | 0.887545 | 0.921954 |
| IN080      | 15q15.1  | -0.010639633 | 0.887589 | 0.921954 |
| SDHAF2     | 11q12.2  | 0.010629172  | 0.887699 | 0.922021 |
| CDC26      | 9q32     | 0.010589417  | 0.888116 | 0.922406 |
| ZNF630     | Xp11.23  | 0.010541293  | 0.888621 | 0.922856 |
| NLRP6      | 11p15.5  | -0.010539311 | 0.888642 | 0.922856 |
| ADAM19     | 5q33.3   | 0.010528739  | 0.888753 | 0.922924 |
| CBWD6      | 9p11.2   | 0.010516184  | 0.888885 | 0.923013 |
| NKAIN3-IT1 | 8q12.3   | 0.010499643  | 0.889059 | 0.923145 |
| BSCL2      | 11q12.3  | -0.010465968 | 0.889412 | 0.923439 |
| CFAP44     | 3q13.2   | 0.010463875  | 0.889434 | 0.923439 |
| CD52       | 1p36.11  | -0.010403197 | 0.890071 | 0.924052 |
| PLG        | 6q26     | -0.010391177 | 0.890198 | 0.924093 |
| ACOX1      | 17q25.1  | -0.010390643 | 0.890203 | 0.924093 |
| C17ORF78   | 17q12    | -0.010367836 | 0.890443 | 0.924294 |
| SUMF2      | 7p11.2   | 0.010350888  | 0.890621 | 0.924431 |
| RPL23AP82  | 22q13.33 | -0.010334149 | 0.890796 | 0.924565 |
| ENO3       | 17p13.2  | 0.010327878  | 0.890862 | 0.924583 |
| C4BPA      | 1q32.2   | -0.010323688 | 0.890906 | 0.924583 |
| NDUFS1     | 2q33.3   | -0.010304856 | 0.891104 | 0.924715 |
| ST6GAL2    | 2q12.3   | -0.010302764 | 0.891126 | 0.924715 |
| CC2D2B     | 10q24.1  | -0.010292308 | 0.891236 | 0.924781 |
| TESK1      | 9p13.3   | -0.010279748 | 0.891368 | 0.92487  |
| ATOH1      | 4q22.2   | -0.01023942  | 0.891791 | 0.92523  |
| OTUD5      | Xp11.23  | 0.010237901  | 0.891807 | 0.92523  |
| NBPF6      | 1p13.3   | 0.010212543  | 0.892074 | 0.925412 |
| NKX2-6     | 8p21.2   | -0.010212327 | 0.892076 | 0.925412 |
| BPESC1     | 3q23     | 0.010204171  | 0.892162 | 0.925453 |
| RNF139     | 8q24.13  | -0.010191869 | 0.892291 | 0.925539 |
| GLIPR1L1   | 12q21.2  | 0.010161412  | 0.892611 | 0.925823 |
| IFIT1B     | 10q23.31 | 0.010154328  | 0.892685 | 0.925852 |
| HFE        | 6p22.2   | 0.010137468  | 0.892862 | 0.925988 |
| FAM131A    | 3q27.1   | 0.010127006  | 0.892972 | 0.926054 |
| TBCD       | 17q25.3  | -0.010074697 | 0.893522 | 0.926576 |
| SPAG7      | 17p13.2  | -0.010055866 | 0.89372  | 0.926733 |
| TMLHE      | Xq28     | 0.010039127  | 0.893895 | 0.926867 |

|            |          |              |          |          |
|------------|----------|--------------|----------|----------|
| MLLT6      | 17q12    | -0.010028665 | 0.894005 | 0.926933 |
| CHIAP2     | 1p13.2   | -0.01000183  | 0.894287 | 0.927131 |
| XAGE1B     | Xp11.22  | 0.010000074  | 0.894306 | 0.927131 |
| SAR1A      | 10q22.1  | -0.00999728  | 0.894335 | 0.927131 |
| ARSA       | 22q13.33 | -0.009976356 | 0.894555 | 0.927262 |
| MT2A       | 16q13    | -0.009976356 | 0.894555 | 0.927262 |
| UBTD2      | 5q35.1   | 0.009965895  | 0.894665 | 0.927328 |
| BPY2       | Yq11.223 | 0.009961515  | 0.894711 | 0.927328 |
| SLC15A4    | 12q24.33 | -0.009949156 | 0.894841 | 0.927414 |
| SCN10A     | 3p22.2   | 0.009931599  | 0.895025 | 0.927521 |
| PADI2      | 1p36.13  | -0.009930325 | 0.895039 | 0.927521 |
| DTNB       | 2p23.3   | -0.00992614  | 0.895083 | 0.927521 |
| SCGB3A2    | 5q32     | -0.009919593 | 0.895152 | 0.927544 |
| TNFAIP6    | 2q23.3   | -0.0098822   | 0.895545 | 0.927903 |
| GDF2       | 10q11.22 | -0.009873555 | 0.895635 | 0.927949 |
| HBG2       | 11p15.4  | 0.009859208  | 0.895786 | 0.928057 |
| TIPRL      | 1q24.2   | -0.009852907 | 0.895852 | 0.928078 |
| PTMAP11    | 9q22.33  | -0.009845161 | 0.895934 | 0.928114 |
| RPL41      | 12q13.2  | 0.009802691  | 0.89638  | 0.928528 |
| KRTAP4-1   | 17q21.2  | -0.00977258  | 0.896697 | 0.928808 |
| NDUFB2-AS7 | 7q34     | 0.009767121  | 0.896754 | 0.928819 |
| HMX2       | 10q26.13 | -0.009757126 | 0.896859 | 0.928834 |
| ACOT1      | 14q24.3  | -0.009754567 | 0.896886 | 0.928834 |
| IL17RA     | 22q11.1  | 0.009752479  | 0.896908 | 0.928834 |
| LINC00298  | 2p25.1   | 0.009740406  | 0.897035 | 0.928897 |
| ANGPTL2    | 9q33.3   | 0.009737828  | 0.897062 | 0.928897 |
| LRAT       | 4q32.1   | 0.00972214   | 0.897227 | 0.92902  |
| UBE2B      | 5q31.1   | -0.00970435  | 0.897414 | 0.929166 |
| IZUMO2     | 19q13.33 | -0.009649165 | 0.897994 | 0.929704 |
| IFNA6      | 9p21.3   | 0.009645169  | 0.898036 | 0.929704 |
| VENTX      | 10q26.3  | -0.009641579 | 0.898074 | 0.929704 |
| FCER1G     | 1q23.3   | 0.009626933  | 0.898228 | 0.929814 |
| RSPH6A     | 19q13.32 | -0.009622705 | 0.898272 | 0.929814 |
| RBM43      | 2q23.3   | -0.009616471 | 0.898338 | 0.929831 |
| CIC        | 19q13.2  | -0.009612286 | 0.898382 | 0.929831 |
| SNORA5B    | 7p13     | -0.009596201 | 0.898551 | 0.929958 |
| RNF8       | 6p21.2   | 0.009564162  | 0.898888 | 0.930258 |
| SNHG8      | 4q26     | 0.009555793  | 0.898976 | 0.930301 |
| LINC00486  | 2p22.3   | 0.009537892  | 0.899164 | 0.930448 |
| ZBED5      | 11p15.4  | -0.0095265   | 0.899284 | 0.930523 |
| OR1J1      | 9q33.2   | -0.009498564 | 0.899578 | 0.930779 |
| OR2M4      | 1q44     | 0.009485201  | 0.899718 | 0.930876 |
| ITGA10     | 1q21.1   | 0.009480468  | 0.899768 | 0.93088  |
| ACP4       | 19q13.33 | 0.009468937  | 0.899889 | 0.930957 |
| DGCR10     | 22q11.21 | -0.009451523 | 0.900073 | 0.931098 |
| NLE1       | 17q12    | 0.009432344  | 0.900274 | 0.931228 |
| PATE3      | 11q24.2  | -0.009426147 | 0.900339 | 0.931228 |
| CLEC18B    | 16q23.1  | -0.009422977 | 0.900373 | 0.931228 |
| OSBPL9     | 1p32.3   | -0.009421882 | 0.900384 | 0.931228 |
| SRM        | 1p36.22  | 0.009415605  | 0.90045  | 0.931248 |
| PRAME      | 22q11.22 | 0.009410727  | 0.900502 | 0.931253 |
| CXCL1      | 4q13.3   | -0.009403051 | 0.900582 | 0.931288 |
| SLC13A3    | 20q13.12 | -0.009392589 | 0.900692 | 0.931354 |
| ZNF155     | 19q13.31 | 0.009384219  | 0.90078  | 0.931397 |

|             |           |              |          |          |
|-------------|-----------|--------------|----------|----------|
| ITGBL1      | 13q33.1   | -0.009371665 | 0.900913 | 0.931485 |
| C19ORF71    | 19p13.3   | -0.009363296 | 0.901001 | 0.931528 |
| ZNF621      | 3p22.1    | 0.009350742  | 0.901133 | 0.931616 |
| C10RF226    | 1q23.3    | -0.00934028  | 0.901243 | 0.931682 |
| KRTAP12-121 | q22.3     | -0.009331245 | 0.901338 | 0.931732 |
| CDKN2B-AS1  | 9p21.3    | -0.009315191 | 0.901507 | 0.931858 |
| MEPE        | 4q22.1    | -0.009298369 | 0.901684 | 0.931993 |
| ZNF263      | 16p13.3   | 0.009283786  | 0.901837 | 0.932103 |
| ACSM3       | 16p12.3   | 0.00926914   | 0.901991 | 0.932166 |
| GOLGA5      | 14q32.12  | 0.00926914   | 0.901991 | 0.932166 |
| ENOSF1      | 18p11.32  | 0.00926077   | 0.902079 | 0.932195 |
| FGF21       | 19q13.33  | 0.009257652  | 0.902112 | 0.932195 |
| SLC7A13     | 8q21.3    | 0.009220817  | 0.9025   | 0.932547 |
| TCEAL9      | Xq22.2    | -0.009208461 | 0.90263  | 0.932608 |
| ZNF880      | 19q13.41  | -0.009206369 | 0.902652 | 0.932608 |
| KRTAP21-221 | q22.11    | 0.009187173  | 0.902854 | 0.932733 |
| CDK8        | 13q12.13  | -0.009183353 | 0.902894 | 0.932733 |
| ADIG        | 20q11.23  | -0.009181329 | 0.902915 | 0.932733 |
| PCK2        | 14q11.2-c | -0.009177076 | 0.90296  | 0.932733 |
| BNIP3L      | 8p21.2    | -0.009168707 | 0.903048 | 0.932776 |
| RPS26P11    | Xq13.1    | -0.009137156 | 0.90338  | 0.933071 |
| SLC25A22    | 11p15.5   | 0.009131044  | 0.903444 | 0.933075 |
| CLP1        | 11q12.1   | -0.009127911 | 0.903477 | 0.933075 |
| ATP6V0B     | 1p34.1    | -0.009120583 | 0.903554 | 0.933079 |
| LKAAEAR1    | 20q13.33  | -0.009118654 | 0.903575 | 0.933079 |
| DLX2        | 2q31.1    | -0.009101075 | 0.90376  | 0.933222 |
| LOC256880   | 4q23      | 0.009072477  | 0.90406  | 0.933482 |
| TSC2        | 16p13.3   | 0.009068274  | 0.904105 | 0.933482 |
| PRR29       | 17q23.3   | 0.009059904  | 0.904193 | 0.933525 |
| ZNF469      | 16q24.2   | 0.009038981  | 0.904413 | 0.933704 |
| CCDC116     | 22q11.21  | 0.009009688  | 0.904721 | 0.933974 |
| NFS1        | 20q11.22  | 0.009003411  | 0.904787 | 0.933994 |
| LOC93622    | 4p16.1    | 0.008982487  | 0.905008 | 0.934147 |
| ODF2L       | 1p22.3    | -0.008980395 | 0.90503  | 0.934147 |
| CSPG5       | 3p21.31   | 0.008913439  | 0.905734 | 0.934826 |
| TUBA3C      | 13q12.11  | -0.008908873 | 0.905782 | 0.934828 |
| C19ORF73    | 19q13.33  | 0.008890423  | 0.905977 | 0.93483  |
| TPTE2P1     | 13q12.13  | -0.008888336 | 0.905999 | 0.93483  |
| ZFC3H1      | 12q21.1   | 0.008888331  | 0.905999 | 0.93483  |
| CARD17      | 11q22.3   | 0.008887597  | 0.906006 | 0.93483  |
| FES         | 15q26.1   | -0.008884146 | 0.906043 | 0.93483  |
| SSC5D       | 19q13.42  | -0.008882054 | 0.906065 | 0.93483  |
| OR4M2       | 15q11.2   | -0.008872176 | 0.906169 | 0.934889 |
| FAM182B     | 20p11.1   | -0.008854853 | 0.906351 | 0.934918 |
| SMC6        | 2p24.2    | 0.008854853  | 0.906351 | 0.934918 |
| FOXE1       | 9q22.33   | -0.008854774 | 0.906352 | 0.934918 |
| OTOP1       | 4p16.3    | 0.008851682  | 0.906385 | 0.934918 |
| NDUFB1      | 14q32.12  | 0.008844391  | 0.906461 | 0.934949 |
| LOC100270   | 6p22.2    | 0.008838114  | 0.906527 | 0.934969 |
| TTLL1       | 22q13.2   | 0.00882556   | 0.90666  | 0.935057 |
| CRTAP       | 3p22.3    | 0.008806729  | 0.906858 | 0.935213 |
| SNHG20      | 17q25.2   | 0.00879836   | 0.906946 | 0.935256 |
| LHX3        | 9q34.3    | 0.008768584  | 0.907259 | 0.935531 |
| APOBR       | 16p12.1   | -0.008756512 | 0.907387 | 0.935614 |

|           |            |               |           |           |
|-----------|------------|---------------|-----------|-----------|
| HHAT      | 1q32. 2    | 0. 008733497  | 0. 907629 | 0. 935815 |
| N6AMT1    | 21q21. 3   | -0. 008691649 | 0. 90807  | 0. 936221 |
| ATRIP     | 3p21. 31   | -0. 008674911 | 0. 908246 | 0. 936355 |
| OR52H1    | 11p15. 4   | 0. 008660036  | 0. 908402 | 0. 936408 |
| TSLP      | 5q22. 1    | -0. 008653987 | 0. 908466 | 0. 936408 |
| OTUD7B    | 1q21. 2    | 0. 008651895  | 0. 908488 | 0. 936408 |
| PFKFB2    | 1q32. 1    | 0. 008651895  | 0. 908488 | 0. 936408 |
| TENM3-AS1 | 4q34. 3    | -0. 008647755 | 0. 908532 | 0. 936408 |
| GTF3C6    | 6q21       | -0. 008641433 | 0. 908598 | 0. 936428 |
| OR1F2P    | 16p13. 3   | -0. 008625578 | 0. 908765 | 0. 936552 |
| SAMD4B    | 19q13. 2   | 0. 008599586  | 0. 909039 | 0. 936786 |
| LY6G5B    | 6p21. 33   | 0. 008587032  | 0. 909171 | 0. 936874 |
| FOSL2     | 2p23. 2    | 0. 008578662  | 0. 909259 | 0. 936891 |
| DNMT3A    | 2p23. 3    | 0. 00857657   | 0. 909281 | 0. 936891 |
| DISP2     | 15q15. 1   | -0. 008570293 | 0. 909348 | 0. 936891 |
| GRM3      | 7q21. 11-c | -0. 008567673 | 0. 909375 | 0. 936891 |
| EPOR      | 19p13. 2   | -0. 008543092 | 0. 909634 | 0. 937109 |
| WRNIP1    | 6p25. 2    | -0. 008524261 | 0. 909832 | 0. 937265 |
| GRHPR     | 9p13. 2    | 0. 00850543   | 0. 910031 | 0. 937373 |
| NNAT      | 20q11. 23  | 0. 00850543   | 0. 910031 | 0. 937373 |
| HTR1A     | 5q12. 3    | 0. 008436889  | 0. 910753 | 0. 938068 |
| MIEF2     | 17p11. 2   | 0. 008428012  | 0. 910846 | 0. 938116 |
| CPS1      | 2q34       | 0. 008398719  | 0. 911155 | 0. 938386 |
| F13B      | 1q31. 3    | 0. 008390609  | 0. 91124  | 0. 938403 |
| CCNJL     | 5q33. 3    | -0. 008388258 | 0. 911265 | 0. 938403 |
| C17ORF10C | 17p13. 1   | -0. 008381981 | 0. 911331 | 0. 938422 |
| CES1      | 16q12. 2   | -0. 008363149 | 0. 91153  | 0. 938578 |
| AANAT     | 17q25. 1   | 0. 008341992  | 0. 911753 | 0. 938741 |
| TPTE2P3   | 13q14. 3   | 0. 008339247  | 0. 911781 | 0. 938741 |
| MIAT      | 22q12. 1   | -0. 008331764 | 0. 91186  | 0. 938774 |
| ICMT      | 1p36. 31   | -0. 008323395 | 0. 911948 | 0. 938816 |
| PSD3      | 8p22       | 0. 008298286  | 0. 912213 | 0. 93904  |
| UBAP2L    | 1q21. 3    | 0. 008285732  | 0. 912345 | 0. 939128 |
| LMAN2L    | 2q11. 2    | -0. 008268993 | 0. 912522 | 0. 939235 |
| MMP19     | 12q13. 2   | -0. 008266901 | 0. 912544 | 0. 939235 |
| CFI       | 4q25       | 0. 008245977  | 0. 912764 | 0. 939414 |
| PRR34-AS1 | 22q13. 31  | 0. 008220869  | 0. 913029 | 0. 939638 |
| SNAPC4    | 9q34. 3    | -0. 0082125   | 0. 913117 | 0. 939677 |
| TFRC      | 3q29       | -0. 008208315 | 0. 913161 | 0. 939677 |
| PABPC1P2  | 2q22. 3    | -0. 008187304 | 0. 913382 | 0. 93983  |
| SOX15     | 17p13. 1   | -0. 008185303 | 0. 913404 | 0. 93983  |
| TCP10     | 6q27       | -0. 008099368 | 0. 914309 | 0. 940713 |
| ARRDC3    | 5q14. 3    | -0. 008059758 | 0. 914727 | 0. 941094 |
| TACC2     | 10q26. 13  | 0. 008053481  | 0. 914793 | 0. 941114 |
| ATF4      | 22q13. 1   | -0. 008036742 | 0. 914969 | 0. 941247 |
| MYH9      | 22q12. 3   | -0. 008013726 | 0. 915212 | 0. 941448 |
| LINC00893 | Xq28       | 0. 007988618  | 0. 915477 | 0. 941672 |
| ANKRD20A8 | 2q11. 1    | -0. 00797092  | 0. 915663 | 0. 94175  |
| ZACN      | 17q25. 1   | 0. 007967927  | 0. 915695 | 0. 94175  |
| WWC2      | 4q35. 1    | -0. 007965602 | 0. 915719 | 0. 94175  |
| ADO       | 10q21. 3   | -0. 007963509 | 0. 915741 | 0. 94175  |
| GPR137B   | 1q42. 3    | -0. 007936309 | 0. 916028 | 0. 941997 |
| TIMP2     | 17q25. 3   | 0. 00791957   | 0. 916204 | 0. 94213  |
| C1RL      | 12p13. 31  | 0. 007907016  | 0. 916337 | 0. 942192 |



|           |           |              |          |          |
|-----------|-----------|--------------|----------|----------|
| NDUFV3    | 21q22.3   | -0.007904923 | 0.916359 | 0.942192 |
| MYLK2     | 20q11.21  | -0.007890293 | 0.916513 | 0.942254 |
| MRPL51    | 12p13.31  | 0.007890277  | 0.916513 | 0.942254 |
| CORO1C    | 12q24.11  | 0.007865169  | 0.916778 | 0.942477 |
| SRFBP1    | 5q23.1    | -0.007854707 | 0.916888 | 0.942542 |
| LOC392196 | 8p23.1    | 0.007841299  | 0.91703  | 0.942639 |
| FXYD7     | 19q13.12  | -0.007821908 | 0.917234 | 0.942801 |
| OGFOD2    | 12q24.31  | -0.007779382 | 0.917682 | 0.943213 |
| PDZD9     | 16p12.2   | 0.007766672  | 0.917816 | 0.943302 |
| C7ORF71   | 7p15.2    | -0.007750947 | 0.917982 | 0.943424 |
| GALNTL5   | 7q36.1    | -0.00773905  | 0.918108 | 0.943472 |
| ZNF28     | 19q13.41  | -0.007737535 | 0.918124 | 0.943472 |
| HINT1     | 5q23.3    | -0.007674764 | 0.918786 | 0.944104 |
| MRPS31    | 13q14.11  | 0.007664302  | 0.918896 | 0.944169 |
| CXADRP2   | 15q11.2   | 0.007651872  | 0.919027 | 0.944253 |
| ID3       | 1p36.12   | 0.007647563  | 0.919073 | 0.944253 |
| MBL2      | 10q21.1   | 0.007640972  | 0.919142 | 0.944276 |
| SULF1     | 8q13.2-q1 | 0.007630825  | 0.919249 | 0.944338 |
| GPR26     | 10q26.13  | 0.007584437  | 0.919738 | 0.944792 |
| SPACA9    | 9q34.13   | 0.0075555    | 0.920043 | 0.945029 |
| BROX      | 1q41      | -0.007551315 | 0.920088 | 0.945029 |
| PLGLA     | 2q12.2    | -0.007549069 | 0.920111 | 0.945029 |
| CAMKV     | 3p21.31   | -0.007532203 | 0.920289 | 0.945154 |
| PTGIR     | 19q13.32  | 0.007526207  | 0.920352 | 0.945154 |
| NENF      | 1q32.3    | -0.007524114 | 0.920375 | 0.945154 |
| COA3      | 17q21.2   | 0.007505283  | 0.920573 | 0.945309 |
| PEX26     | 22q11.21  | -0.007490637 | 0.920728 | 0.945416 |
| CLEC2B    | 12p13.31  | -0.007486452 | 0.920772 | 0.945416 |
| GML       | 8q24.3    | -0.007456251 | 0.92109  | 0.945689 |
| FOXI3     | 2p11.2    | -0.007452286 | 0.921132 | 0.945689 |
| KRTAP11-1 | 21q22.11  | -0.00743974  | 0.921265 | 0.945776 |
| PLA2G7    | 6p12.3    | 0.00741322   | 0.921544 | 0.946015 |
| CXCL8     | 4q13.3    | 0.007406942  | 0.921611 | 0.946034 |
| RNU12-2P  | Xp11.3    | 0.007401594  | 0.921667 | 0.946043 |
| SERTAD2   | 2p14      | 0.007323248  | 0.922493 | 0.946843 |
| STX16     | 20q13.32  | 0.007312786  | 0.922604 | 0.946908 |
| APLF      | 2p13.3    | -0.007296048 | 0.92278  | 0.94697  |
| MAP3K5    | 6q23.3    | 0.007293955  | 0.922803 | 0.94697  |
| IFNK      | 9p21.2    | 0.00729362   | 0.922806 | 0.94697  |
| TRUB2     | 9q34.11   | 0.007287678  | 0.922869 | 0.946985 |
| CYLC1     | Xq21.1    | -0.007252778 | 0.923237 | 0.947217 |
| OR8K3     | 11q12.1   | -0.007252778 | 0.923237 | 0.947217 |
| TRIM60    | 4q32.3    | 0.007252778  | 0.923237 | 0.947217 |
| SREBF2    | 22q13.2   | -0.007222815 | 0.923553 | 0.947493 |
| C1QTNF4   | 11p11.2   | 0.007208206  | 0.923707 | 0.947602 |
| HIST1H4K  | 6p22.1    | 0.007194978  | 0.923847 | 0.947697 |
| HOXD13    | 2q31.1    | -0.007177003 | 0.924037 | 0.947843 |
| MBD2      | 18q21.2   | -0.007160044 | 0.924216 | 0.947978 |
| TCOF1     | 5q32-q33. | 0.007124474  | 0.924591 | 0.948314 |
| ADD3      | 10q25.1-c | 0.007090997  | 0.924944 | 0.948628 |
| CFHR4     | 1q31.3    | -0.007005808 | 0.925843 | 0.949459 |
| SEPTIN2   | 2q37.3    | -0.00700521  | 0.92585  | 0.949459 |
| C1QA      | 1p36.12   | -0.006996841 | 0.925938 | 0.949501 |
| CLUH      | 17p13.3   | 0.006980102  | 0.926115 | 0.949607 |

|                        |                       |              |          |          |
|------------------------|-----------------------|--------------|----------|----------|
| RPS26                  | 12q13.2               | -0.006978009 | 0.926137 | 0.949607 |
| FAM181A- <del>A</del>  | 14q32.12              | -0.006964546 | 0.926279 | 0.949704 |
| GGH                    | 8q12.3                | -0.006952901 | 0.926402 | 0.949782 |
| RWDD3                  | 1p21.3                | -0.006877576 | 0.927197 | 0.950518 |
| PROM1                  | 4p15.32               | -0.006873395 | 0.927241 | 0.950518 |
| SERPINB9               | 6p25.2                | 0.006871299  | 0.927263 | 0.950518 |
| SNORA37                | 18q21.2               | 0.006864576  | 0.927334 | 0.950542 |
| CLK1                   | 2q33.1                | 0.00685456   | 0.92744  | 0.950576 |
| OR51E2                 | 11p15.4               | -0.006852472 | 0.927462 | 0.950576 |
| DBX1                   | 11p15.1               | -0.006813266 | 0.927876 | 0.950905 |
| AQP7P1                 | 9q13                  | 0.006808532  | 0.927926 | 0.950905 |
| ADORA1                 | 1q32.1                | 0.006808528  | 0.927926 | 0.950905 |
| IFNA17                 | 9p21.3                | -0.006803534 | 0.927979 | 0.95091  |
| TSSK3                  | 1p35.1                | 0.00678342   | 0.928191 | 0.951079 |
| EPB41L4A- <del>A</del> | 5q22.2                | -0.006764589 | 0.92839  | 0.951156 |
| MAGEB18                | Xp21.3                | 0.006763966  | 0.928396 | 0.951156 |
| NTN5                   | 19q13.33              | -0.006758322 | 0.928456 | 0.951156 |
| SNAPC1                 | 14q23.2               | -0.006758312 | 0.928456 | 0.951156 |
| TMEM213                | 7q34                  | 0.006744456  | 0.928602 | 0.951239 |
| NGDN                   | 14q11.2               | -0.006741573 | 0.928633 | 0.951239 |
| UPK3A                  | 22q13.31              | -0.006736071 | 0.928691 | 0.95125  |
| SFXN1                  | 5q35.2                | -0.006724834 | 0.928809 | 0.951323 |
| LGALS8                 | 1q43                  | 0.006703911  | 0.92903  | 0.9515   |
| CDKN2C                 | 1p32.3                | 0.006695541  | 0.929119 | 0.951513 |
| C15ORF32               | 15q26.1               | 0.006692445  | 0.929151 | 0.951513 |
| TRAFD1                 | 12q24.13              | 0.006689264  | 0.929185 | 0.951513 |
| FEM1C                  | 5q22.3                | 0.006666248  | 0.929428 | 0.951713 |
| FAM138E                | 15q26.3               | 0.006631416  | 0.929796 | 0.952022 |
| DMAP1                  | 1p34.1                | -0.006628586 | 0.929826 | 0.952022 |
| DESI2                  | 1q44                  | 0.006609755  | 0.930025 | 0.952177 |
| RAX2                   | 19p13.3               | -0.006587925 | 0.930255 | 0.952364 |
| TDRD5                  | 1q25.2                | 0.006553329  | 0.93062  | 0.95269  |
| HIST4H4                | 12p12.3               | -0.006515599 | 0.931019 | 0.953049 |
| CLEC18C                | 16q22.1               | 0.006481818  | 0.931376 | 0.953358 |
| CDC14B                 | 9q22.32- <del>c</del> | -0.006477936 | 0.931417 | 0.953358 |
| DMAC1                  | 9p24.1                | -0.006467474 | 0.931527 | 0.953422 |
| ADAMTS13               | 9q34.2                | 0.006452828  | 0.931682 | 0.953532 |
| C4ORF45                | 4q32.1                | 0.006444211  | 0.931773 | 0.953568 |
| COL13A1                | 10q22.1               | -0.006438181 | 0.931837 | 0.953568 |
| CROT                   | 7q21.12               | -0.006433997 | 0.931881 | 0.953568 |
| LINC01098              | 4q34.3                | 0.006431418  | 0.931908 | 0.953568 |
| ING2                   | 4q35.1                | -0.00641935  | 0.932035 | 0.95365  |
| FAM83F                 | 22q13.1               | -0.006385872 | 0.932389 | 0.953963 |
| LINC01600              | 6p25.2                | 0.006366877  | 0.93259  | 0.954063 |
| BAIAP3                 | 16p13.3               | 0.006364949  | 0.93261  | 0.954063 |
| AQP10                  | 1q21.3                | 0.006363028  | 0.93263  | 0.954063 |
| TMEM68                 | 8q12.1                | -0.006346118 | 0.932809 | 0.954197 |
| DKK3                   | 11p15.3               | 0.006302178  | 0.933273 | 0.95457  |
| SPTY2D1                | 11p15.1               | -0.006300086 | 0.933295 | 0.95457  |
| SELENOF                | 1p22.3                | 0.006297993  | 0.933317 | 0.95457  |
| SPATA5                 | 4q28.1                | 0.006291716  | 0.933384 | 0.954589 |
| NRBF2                  | 10q21.3               | -0.006281258 | 0.933494 | 0.954605 |
| P4HA2                  | 5q31.1                | -0.006281255 | 0.933494 | 0.954605 |
| OR1E1                  | 17p13.3               | 0.006244907  | 0.933878 | 0.954919 |

|           |            |               |           |           |
|-----------|------------|---------------|-----------|-----------|
| UBQLN3    | 11p15. 4   | 0. 006243111  | 0. 933897 | 0. 954919 |
| RGS8      | 1q25. 3    | 0. 006237433  | 0. 933957 | 0. 954931 |
| GBGT1     | 9q34. 2    | -0. 006210114 | 0. 934246 | 0. 955178 |
| AOC4P     | 17q21. 31  | 0. 006198095  | 0. 934373 | 0. 955259 |
| LOC391322 | 22q11. 23  | -0. 006142184 | 0. 934963 | 0. 955814 |
| METTL15   | 11p14. 1   | 0. 006135839  | 0. 93503  | 0. 955833 |
| LRP5L     | 22q11. 23  | -0. 006101312 | 0. 935395 | 0. 956157 |
| HSD17B13  | 4q22. 1    | -0. 006088758 | 0. 935528 | 0. 956218 |
| FCGR3A    | 1q23. 3    | -0. 006086665 | 0. 93555  | 0. 956218 |
| TENT2     | 5q14. 1    | 0. 006074111  | 0. 935683 | 0. 956304 |
| TMEM132E  | 17q12      | -0. 006061557 | 0. 935815 | 0. 956391 |
| PTGR2     | 14q24. 3   | 0. 006053188  | 0. 935904 | 0. 956425 |
| FAM20C    | 7p22. 3    | -0. 006044818 | 0. 935992 | 0. 956425 |
| PHLDB1    | 11q23. 3   | 0. 006044818  | 0. 935992 | 0. 956425 |
| NAPA      | 19q13. 32- | -0. 006030172 | 0. 936147 | 0. 956508 |
| ITSN1     | 21q22. 11  | 0. 006028079  | 0. 936169 | 0. 956508 |
| NUP35     | 2q32. 1    | -0. 006021802 | 0. 936235 | 0. 956527 |
| ZBTB8A    | 1p35. 1    | 0. 005982048  | 0. 936655 | 0. 956907 |
| TARDBP    | 1p36. 22   | 0. 005971586  | 0. 936766 | 0. 956971 |
| TULP1     | 6p21. 31   | 0. 005965668  | 0. 936828 | 0. 956986 |
| FAM95B1   | 9p11. 2    | 0. 005946478  | 0. 937031 | 0. 957144 |
| TPSAB1    | 16p13. 3   | 0. 0059402    | 0. 937098 | 0. 957163 |
| FLYWCH1   | 16p13. 3   | 0. 005923462  | 0. 937274 | 0. 957295 |
| CDYL      | 6p25. 1    | -0. 005906723 | 0. 937451 | 0. 957421 |
| TRIM75P   | 4q32. 3    | -0. 005902744 | 0. 937493 | 0. 957421 |
| FAM47B    | Xp21. 1    | 0. 005893141  | 0. 937595 | 0. 957475 |
| PDXDC1    | 16p13. 11  | 0. 005866968  | 0. 937871 | 0. 957709 |
| TUBBP5    | 9q34. 3    | 0. 005860866  | 0. 937936 | 0. 957726 |
| CTBP1     | 4p16. 3    | 0. 005848137  | 0. 93807  | 0. 957814 |
| TAF9      | 5q13. 2    | 0. 005839767  | 0. 938159 | 0. 957856 |
| LCMT1     | 16p12. 1   | 0. 005829306  | 0. 938269 | 0. 95792  |
| OR5P2     | 11p15. 4   | 0. 005806457  | 0. 938511 | 0. 958117 |
| DGKZ      | 11p11. 2   | -0. 005730965 | 0. 939309 | 0. 958869 |
| P3H1      | 1p34. 2    | 0. 005720503  | 0. 939419 | 0. 958869 |
| DEFA4     | 8p23. 1    | 0. 005719945  | 0. 939425 | 0. 958869 |
| CASR      | 3q13. 33-c | -0. 005710071 | 0. 93953  | 0. 958869 |
| TBC1D25   | Xp11. 23   | -0. 005710041 | 0. 93953  | 0. 958869 |
| SNORA67   | 17p13. 1   | 0. 005709508  | 0. 939536 | 0. 958869 |
| SMR3B     | 4q13. 3    | -0. 005692043 | 0. 93972  | 0. 958882 |
| ATG14     | 14q22. 3   | -0. 005687025 | 0. 939773 | 0. 958882 |
| VPS51     | 11q13. 1   | -0. 005687025 | 0. 939773 | 0. 958882 |
| C10RF122  | 1p34. 3    | -0. 005678656 | 0. 939862 | 0. 958882 |
| DSCR10    | 21q22. 13  | 0. 005677111  | 0. 939878 | 0. 958882 |
| OSR2      | 8q22. 2    | -0. 005676564 | 0. 939884 | 0. 958882 |
| U2AF1L4   | 19q13. 12  | 0. 005676564  | 0. 939884 | 0. 958882 |
| CRISP1    | 6p12. 3    | 0. 005660373  | 0. 940055 | 0. 959008 |
| ZRANB2    | 1p31. 1    | 0. 005651455  | 0. 940149 | 0. 959029 |
| VKORC1L1  | 7q11. 21   | -0. 005649363 | 0. 940171 | 0. 959029 |
| SKP1      | 5q31. 1    | -0. 005609608 | 0. 940592 | 0. 959402 |
| FGF       | 4q31. 3    | -0. 00560567  | 0. 940633 | 0. 959402 |
| IAPP      | 12p12. 1   | -0. 005593154 | 0. 940766 | 0. 959488 |
| HSFY2     | Yq11. 222  | -0. 005576762 | 0. 940939 | 0. 959616 |
| MCM8      | 20p12. 3   | -0. 005561484 | 0. 9411   | 0. 959731 |
| RNASE4    | 14q11. 2   | 0. 005517544  | 0. 941565 | 0. 960087 |

|            |            |               |           |           |
|------------|------------|---------------|-----------|-----------|
| WWP1       | 8q21. 3    | -0. 005515452 | 0. 941587 | 0. 960087 |
| DCAF13     | 8q22. 3    | 0. 005511267  | 0. 941631 | 0. 960087 |
| SRD5A2     | 2p23. 1    | 0. 005510277  | 0. 941642 | 0. 960087 |
| GATD3A     | 21q22. 3   | 0. 005498713  | 0. 941764 | 0. 960163 |
| TEX55      | 3q13. 32   | -0. 005482608 | 0. 941934 | 0. 960288 |
| OR10A6     | 11p15. 4   | -0. 005472578 | 0. 94204  | 0. 960347 |
| ANP32A-IT1 | 15q23      | 0. 005465338  | 0. 942117 | 0. 960376 |
| OR4K2      | 14q11. 2   | 0. 005458917  | 0. 942185 | 0. 960396 |
| MC2R       | 18p11. 21  | -0. 005430504 | 0. 942485 | 0. 960613 |
| NUDT21     | 16q13      | 0. 005425481  | 0. 942538 | 0. 960613 |
| C5ORF60    | 5q35. 3    | 0. 005421542  | 0. 94258  | 0. 960613 |
| CRH        | 8q13. 1    | -0. 005420571 | 0. 94259  | 0. 960613 |
| MTA1       | 14q32. 33  | -0. 005377357 | 0. 943047 | 0. 960997 |
| LPAR3      | 1p22. 3    | 0. 005372102  | 0. 943103 | 0. 960997 |
| MIP        | 12q13. 3   | 0. 005371346  | 0. 943111 | 0. 960997 |
| KIR2DS4    | 19q13. 42  | 0. 005347678  | 0. 943361 | 0. 961203 |
| TMTC2      | 12q21. 31  | 0. 005331325  | 0. 943534 | 0. 96133  |
| NDST3      | 4q26       | -0. 005325661 | 0. 943594 | 0. 961342 |
| NDUFAF5    | 20p12. 1   | -0. 005304124 | 0. 943821 | 0. 961525 |
| SPATA21    | 1p36. 13   | 0. 00526302   | 0. 944256 | 0. 961919 |
| MSH4       | 1p31. 1    | 0. 005232901  | 0. 944575 | 0. 962194 |
| SHISAL2A   | 1p32. 3    | 0. 005226718  | 0. 94464  | 0. 962212 |
| FRG2B      | 10q26. 3   | -0. 00520259  | 0. 944895 | 0. 962403 |
| HCG22      | 6p21. 33   | 0. 005198775  | 0. 944935 | 0. 962403 |
| FRAS1      | 4q21. 21   | -0. 005195321 | 0. 944972 | 0. 962403 |
| KRTAP19-ε  | 21q22. 11  | -0. 005183098 | 0. 945101 | 0. 962485 |
| FASTKD2    | 2q33. 3    | 0. 005161844  | 0. 945326 | 0. 962665 |
| SPZ1       | 5q14. 1    | 0. 005157156  | 0. 945376 | 0. 962667 |
| AVP        | 20p13      | 0. 00514862   | 0. 945466 | 0. 96271  |
| PDLIM5     | 4q22. 3    | 0. 005115812  | 0. 945813 | 0. 963014 |
| PLK2       | 5q11. 2    | -0. 00510535  | 0. 945923 | 0. 963057 |
| LINC00575  | 4q21. 22   | 0. 00510265   | 0. 945952 | 0. 963057 |
| ECE1       | 1p36. 12   | 0. 005092796  | 0. 946056 | 0. 963114 |
| KRTAP4-2   | 17q21. 2   | -0. 005083378 | 0. 946156 | 0. 963167 |
| LINC00606  | 3p25. 3    | -0. 005067243 | 0. 946327 | 0. 963291 |
| MAP3K10    | 19q13. 2   | -0. 005046764 | 0. 946543 | 0. 963463 |
| PANK3      | 5q34       | -0. 00496307  | 0. 947428 | 0. 964315 |
| INPP5E     | 9q34. 3    | -0. 0049275   | 0. 947805 | 0. 964649 |
| C17ORF102  | 17q12      | -0. 004859116 | 0. 948528 | 0. 965336 |
| JUN        | 1p32. 1    | 0. 004822882  | 0. 948911 | 0. 965677 |
| ARHGAP22   | 10q11. 22- | 0. 004783127  | 0. 949332 | 0. 96601  |
| ZNF223     | 19q13. 31  | 0. 004778943  | 0. 949376 | 0. 96601  |
| CTAG1B     | Xq28       | -0. 004778217 | 0. 949384 | 0. 96601  |
| PLCE1      | 10q23. 33  | 0. 004745465  | 0. 94973  | 0. 966313 |
| TMEM99     | 17q21. 2   | -0. 004728726 | 0. 949907 | 0. 966444 |
| PSG5       | 19q13. 31  | -0. 004717473 | 0. 950026 | 0. 966516 |
| CLDND1     | 3q11. 2    | 0. 00470571   | 0. 950151 | 0. 966544 |
| MEPCE      | 7q22. 1    | 0. 00470571   | 0. 950151 | 0. 966544 |
| ST7-AS2    | 7q31. 2    | 0. 004694627  | 0. 950268 | 0. 966581 |
| ARHGEF4    | 2q21. 1    | 0. 004693156  | 0. 950284 | 0. 966581 |
| LRRC52     | 1q24. 1    | 0. 004682702  | 0. 950394 | 0. 966595 |
| FANCG      | 9p13. 3    | -0. 004682694 | 0. 950394 | 0. 966595 |
| PAGR1      | 16p11. 2   | 0. 004668048  | 0. 950549 | 0. 966704 |
| ANP32E     | 1q21. 2    | 0. 004653401  | 0. 950704 | 0. 966812 |

|           |           |              |          |          |
|-----------|-----------|--------------|----------|----------|
| C2CD4C    | 19p13.3   | -0.004645034 | 0.950793 | 0.966826 |
| FAM160A1  | 4q31.3    | 0.004642939  | 0.950815 | 0.966826 |
| EXOSC9    | 4q27      | 0.004630385  | 0.950948 | 0.966912 |
| GOLGA8F   | 15q13.1   | -0.004613392 | 0.951128 | 0.967046 |
| PIK3R2    | 19p13.11  | -0.004596907 | 0.951302 | 0.967147 |
| UGGT2     | 13q32.1   | -0.004594815 | 0.951324 | 0.967147 |
| PTP4A2    | 1p35.2    | 0.004542506  | 0.951878 | 0.967661 |
| CATSPERD  | 19p13.3   | 0.004533171  | 0.951976 | 0.967712 |
| OR2A2     | 7q35      | 0.004516853  | 0.952149 | 0.967838 |
| APOBEC3B  | 22q13.1   | 0.004496474  | 0.952365 | 0.967977 |
| SIRT2     | 19q13.2   | -0.00449229  | 0.952409 | 0.967977 |
| KCNAB3    | 17p13.1   | -0.004490197 | 0.952431 | 0.967977 |
| FGA       | 4q31.3    | -0.004478692 | 0.952553 | 0.968036 |
| PCDHB10   | 5q31.3    | 0.004475551  | 0.952586 | 0.968036 |
| OR1B1     | 9q33.2    | 0.004457592  | 0.952776 | 0.96818  |
| FAM45A    | 10q26.11  | 0.004448353  | 0.952874 | 0.968189 |
| KRTAP24-1 | 121q22.11 | 0.00444758   | 0.952882 | 0.968189 |
| JAG2      | 14q32.33  | -0.004435796 | 0.953007 | 0.96824  |
| SLC6A9    | 1p34.1    | -0.004433704 | 0.953029 | 0.96824  |
| SNORA16B  | 1q32.3    | 0.00439585   | 0.953429 | 0.968598 |
| PIP5K1P1  | 6p24.3    | 0.004386553  | 0.953528 | 0.968649 |
| ARHGAP39  | 8q24.3    | -0.004358379 | 0.953826 | 0.968901 |
| OR10J5    | 1q23.2    | 0.004351667  | 0.953897 | 0.968901 |
| CDH20     | 18q21.33  | -0.004349339 | 0.953922 | 0.968901 |
| VPS18     | 15q15.1   | -0.004320716 | 0.954225 | 0.969159 |
| LAPTM4B   | 8q22.1    | 0.00430607   | 0.95438  | 0.969267 |
| MBD4      | 3q21.3    | 0.004287239  | 0.954579 | 0.969421 |
| LRRTM3    | 10q21.3   | -0.004268862 | 0.954773 | 0.969569 |
| WNT8A     | 5q31.2    | 0.004233396  | 0.955149 | 0.969901 |
| MRPL45    | 17q12     | 0.004220283  | 0.955287 | 0.969988 |
| ZNF217    | 20q13.2   | -0.004216099 | 0.955332 | 0.969988 |
| HDAC3     | 5q31.3    | 0.004205637  | 0.955442 | 0.970051 |
| DRD1      | 5q35.2    | -0.004191034 | 0.955597 | 0.970159 |
| OR11L1    | 1q44      | -0.004183254 | 0.955679 | 0.970177 |
| FERD3L    | 7p21.1    | 0.004180174  | 0.955712 | 0.970177 |
| GPR161    | 1q24.2    | 0.004172159  | 0.955797 | 0.970214 |
| CDC73     | 1q31.2    | 0.004126127  | 0.956284 | 0.970605 |
| NXPE1     | 11q23.2   | -0.004122546 | 0.956322 | 0.970605 |
| SYAP1     | Xp22.2    | 0.004121943  | 0.956328 | 0.970605 |
| HVCN1     | 12q24.11  | -0.00408428  | 0.956727 | 0.970961 |
| TBX5      | 12q24.21  | 0.004077075  | 0.956803 | 0.970975 |
| ZNF808    | 19q13.41  | 0.004073818  | 0.956838 | 0.970975 |
| GRK6      | 5q35.3    | -0.004063357 | 0.956948 | 0.971038 |
| AKR7A2    | 1p36.13   | -0.004042433 | 0.95717  | 0.971123 |
| RMND5B    | 5q35.3    | 0.004042433  | 0.95717  | 0.971123 |
| TAS2R20   | 12p13.2   | 0.004040341  | 0.957192 | 0.971123 |
| TSPY2     | Yp11.2    | 0.004037054  | 0.957227 | 0.971123 |
| HCST      | 19q13.12  | -0.004019417 | 0.957414 | 0.971236 |
| LSS       | 21q22.3   | -0.004017325 | 0.957436 | 0.971236 |
| ATP11AUN  | 13q34     | -0.003988366 | 0.957742 | 0.971498 |
| RFC5      | 12q24.23  | -0.003965016 | 0.957989 | 0.971699 |
| SULT1C3   | 2q12.3    | -0.003946512 | 0.958185 | 0.971849 |
| MYBPHL    | 1p13.3    | -0.00386677  | 0.959029 | 0.972655 |
| GH2       | 17q23.3   | -0.003834819 | 0.959368 | 0.972949 |

|           |           |               |           |           |
|-----------|-----------|---------------|-----------|-----------|
| CLDN11    | 3q26. 2   | 0. 00382692   | 0. 959451 | 0. 972976 |
| ASTL      | 2q11. 2   | -0. 003820105 | 0. 959523 | 0. 972976 |
| GMEB2     | 20q13. 33 | 0. 003818551  | 0. 95954  | 0. 972976 |
| FER       | 5q21. 3   | 0. 003812274  | 0. 959606 | 0. 972994 |
| USP17L2   | 8p23. 1   | -0. 003782181 | 0. 959925 | 0. 973267 |
| BARD1     | 2q35      | -0. 00376415  | 0. 960116 | 0. 973412 |
| FAM122C   | Xq26. 3   | 0. 003753688  | 0. 960227 | 0. 973474 |
| NUP107    | 12q15     | -0. 00372021  | 0. 960581 | 0. 973784 |
| CASC8     | 8q24. 21  | -0. 003715639 | 0. 960629 | 0. 973784 |
| TBX3      | 12q24. 21 | -0. 003707656 | 0. 960714 | 0. 97382  |
| RPL9      | 4p14      | 0. 003693009  | 0. 960869 | 0. 973924 |
| LRWD1     | 7q22. 1   | 0. 003688825  | 0. 960913 | 0. 973924 |
| NETO1     | 18q22. 3  | 0. 003658511  | 0. 961234 | 0. 9742   |
| TTY10     | Yq11. 223 | -0. 003635204 | 0. 961481 | 0. 9744   |
| PYY       | 17q21. 31 | 0. 003618381  | 0. 961659 | 0. 974531 |
| ELAVL1    | 19p13. 2  | 0. 003609315  | 0. 961755 | 0. 974579 |
| UBE2J2    | 1p36. 33  | -0. 003588393 | 0. 961977 | 0. 974745 |
| SNORA44   | 1p35. 3   | 0. 003583207  | 0. 962032 | 0. 974745 |
| WASL      | 7q31. 32  | -0. 003580022 | 0. 962065 | 0. 974745 |
| GABRA4    | 4p12      | 0. 003570502  | 0. 962166 | 0. 974759 |
| USP35     | 11q14. 1  | -0. 00356956  | 0. 962176 | 0. 974759 |
| CACNA1E   | 1q25. 3   | -0. 003513076 | 0. 962774 | 0. 975315 |
| ERMP1     | 9p24. 1   | -0. 003504697 | 0. 962863 | 0. 975356 |
| LILRA2    | 19q13. 42 | 0. 003464943  | 0. 963284 | 0. 975689 |
| HPVC1     | 7p11. 2   | -0. 003464389 | 0. 96329  | 0. 975689 |
| ANKS4B    | 16p12. 2  | -0. 003428328 | 0. 963672 | 0. 976026 |
| MCM3AP-AS | 21q22. 3  | -0. 003423095 | 0. 963727 | 0. 976027 |
| GALNT9    | 12q24. 33 | 0. 003419013  | 0. 96377  | 0. 976027 |
| ADAM21    | 14q24. 2  | -0. 003364659 | 0. 964346 | 0. 976499 |
| ATP8B1    | 18q21. 31 | 0. 003360325  | 0. 964392 | 0. 976499 |
| CACUL1    | 10q26. 11 | -0. 003360325 | 0. 964392 | 0. 976499 |
| SEMG2     | 20q13. 12 | 0. 00335622   | 0. 964435 | 0. 976499 |
| RASL10A   | 22q12. 2  | 0. 003351957  | 0. 96448  | 0. 976499 |
| ABLIM1    | 10q25. 3  | 0. 003337309  | 0. 964635 | 0. 976607 |
| INSIG1    | 7q36. 3   | 0. 003289185  | 0. 965145 | 0. 977055 |
| TMPRSS11E | 4q13. 2   | -0. 003285214 | 0. 965187 | 0. 977055 |
| LINC02159 | 5q34      | 0. 003281655  | 0. 965225 | 0. 977055 |
| AFG3L2    | 18p11. 21 | -0. 003274538 | 0. 9653   | 0. 977082 |
| LTF       | 3p21. 31  | 0. 003226414  | 0. 96581  | 0. 977548 |
| UBE2R2    | 9p13. 3   | -0. 003165736 | 0. 966452 | 0. 978149 |
| KRTAP13-2 | 21q22. 11 | 0. 003143087  | 0. 966692 | 0. 978342 |
| SLC30A3   | 2p23. 3   | 0. 003126578  | 0. 966867 | 0. 97847  |
| MEGF11    | 15q22. 31 | -0. 003115521 | 0. 966984 | 0. 978539 |
| GPR32     | 19q13. 33 | -0. 003101653 | 0. 967131 | 0. 978638 |
| TLCD3A    | 17p13. 3  | -0. 003088318 | 0. 967272 | 0. 978722 |
| RNF5P1    | 8p11. 22  | -0. 003079949 | 0. 967361 | 0. 978722 |
| SLC39A5   | 12q13. 3  | 0. 003079949  | 0. 967361 | 0. 978722 |
| PLAAT5    | 11q12. 3  | 0. 00306321   | 0. 967538 | 0. 978851 |
| GPBAR1    | 2q35      | 0. 003056933  | 0. 967605 | 0. 978869 |
| GLI1      | 12q13. 3  | 0. 00304438   | 0. 967738 | 0. 978954 |
| UBXN2A    | 2p23. 3   | -0. 003036009 | 0. 967826 | 0. 978994 |
| CRCP      | 7q11. 21  | -0. 003017178 | 0. 968026 | 0. 979021 |
| LOC202181 | 5q35. 3   | -0. 003012994 | 0. 96807  | 0. 979021 |
| WEE2-AS1  | 7q34      | 0. 003008809  | 0. 968115 | 0. 979021 |

|           |            |               |           |           |
|-----------|------------|---------------|-----------|-----------|
| SLC6A19   | 5p15. 33   | -0. 003004813 | 0. 968157 | 0. 979021 |
| CEP295    | 11q21      | 0. 003002532  | 0. 968181 | 0. 979021 |
| SIL1      | 5q31. 2    | -0. 003002532 | 0. 968181 | 0. 979021 |
| RUNDC1    | 17q21. 31  | 0. 002998347  | 0. 968225 | 0. 979021 |
| H2AFB1    | Xq28       | 0. 002996513  | 0. 968245 | 0. 979021 |
| POU4F1    | 13q31. 1   | -0. 002977821 | 0. 968443 | 0. 979172 |
| GRM5      | 11q14. 2-c | -0. 002971177 | 0. 968513 | 0. 979189 |
| DEPP1     | 10q11. 21  | -0. 002966962 | 0. 968558 | 0. 979189 |
| POLR3G    | 5q14. 3    | 0. 00294813   | 0. 968757 | 0. 979341 |
| MRPS27    | 5q13. 2    | -0. 002918837 | 0. 969067 | 0. 979605 |
| CFAP20    | 16q21      | 0. 002904191  | 0. 969223 | 0. 979696 |
| REXO1L6P  | 8q21. 2    | 0. 002901111  | 0. 969255 | 0. 979696 |
| ZNF654    | 3p11. 1    | 0. 00288536   | 0. 969422 | 0. 979815 |
| KRTAP10-1 | 121q22. 3  | 0. 002865321  | 0. 969634 | 0. 97994  |
| LEPROTL1  | 8p12       | -0. 002864436 | 0. 969644 | 0. 97994  |
| ZC2HC1A   | 8q21. 13   | 0. 002833051  | 0. 969976 | 0. 980217 |
| CSRP2     | 12q21. 2   | -0. 002828866 | 0. 970021 | 0. 980217 |
| TOMM5     | 9p13. 2    | 0. 002824681  | 0. 970065 | 0. 980217 |
| ANKRD20A4 | 9q13       | 0. 002806747  | 0. 970255 | 0. 980359 |
| LINC00652 | 20p11. 23  | -0. 002795327 | 0. 970376 | 0. 980432 |
| FIZ1      | 19q13. 42  | -0. 002772373 | 0. 970619 | 0. 980628 |
| LHFPL3    | 7q22. 2-q2 | 0. 00276453   | 0. 970702 | 0. 980662 |
| SLC10A2   | 13q33. 1   | 0. 002748744  | 0. 970869 | 0. 980782 |
| HTR3B     | 11q23. 2   | -0. 00273975  | 0. 970965 | 0. 980828 |
| MTMR9LP   | 1p35. 2    | 0. 002709602  | 0. 971284 | 0. 981101 |
| BACH1     | 21q21. 3   | 0. 002686586  | 0. 971528 | 0. 981298 |
| CENPB     | 20p13      | 0. 002674032  | 0. 971661 | 0. 981383 |
| ATG16L2   | 11q13. 4   | 0. 002651016  | 0. 971905 | 0. 981538 |
| CORO7     | 16p13. 3   | -0. 002644739 | 0. 971971 | 0. 981538 |
| LRTOMT    | 11q13. 4   | 0. 002640554  | 0. 972015 | 0. 981538 |
| TRMT12    | 8q24. 13   | -0. 002636369 | 0. 97206  | 0. 981538 |
| ZFP64     | 20q13. 2   | -0. 002636369 | 0. 97206  | 0. 981538 |
| SEC23A    | 14q21. 1   | -0. 00261963  | 0. 972237 | 0. 98164  |
| NTN4      | 12q22      | -0. 002617538 | 0. 972259 | 0. 98164  |
| MAN2B2    | 4p16. 1    | -0. 002607076 | 0. 97237  | 0. 981702 |
| CACNG1    | 17q24. 2   | -0. 002592475 | 0. 972525 | 0. 981705 |
| MRVI1     | 11p15. 4   | 0. 00259243   | 0. 972525 | 0. 981705 |
| AMBP      | 9q32       | -0. 002588245 | 0. 972569 | 0. 981705 |
| CHRNB1    | 17p13. 1   | -0. 002588245 | 0. 972569 | 0. 981705 |
| NDUFA9    | 12p13. 32  | 0. 002579876  | 0. 972658 | 0. 981735 |
| SNX12     | Xq13. 1    | -0. 002573599 | 0. 972725 | 0. 981735 |
| PKHD1     | 6p12. 3-p1 | 0. 002571512  | 0. 972747 | 0. 981735 |
| CNOT6     | 5q35. 3    | 0. 002565229  | 0. 972813 | 0. 981753 |
| GSTTP2    | 22q11. 23  | 0. 002552621  | 0. 972947 | 0. 981838 |
| LRRC37A   | 17q21. 31  | 0. 002540121  | 0. 973079 | 0. 981889 |
| UGT2B10   | 4q13. 2    | -0. 002538644 | 0. 973095 | 0. 981889 |
| MAGEC1    | Xq27. 2    | -0. 002497896 | 0. 973527 | 0. 982275 |
| FAP       | 2q24. 2    | -0. 002489904 | 0. 973611 | 0. 98231  |
| DAP       | 5p15. 2    | -0. 002458519 | 0. 973944 | 0. 982596 |
| DSCC1     | 8q24. 12   | 0. 002445965  | 0. 974077 | 0. 982604 |
| LOC100134 | 16p13. 3   | -0. 002443874 | 0. 974099 | 0. 982604 |
| MAP1LC3A  | 20q11. 22  | 0. 002443873  | 0. 974099 | 0. 982604 |
| SRRM2-AS1 | 16p13. 3   | -0. 00242295  | 0. 974321 | 0. 982734 |
| C16ORF78  | 16q12. 1   | -0. 002419523 | 0. 974357 | 0. 982734 |

|           |            |               |           |           |
|-----------|------------|---------------|-----------|-----------|
| SPANXA2   | Xq27. 2    | -0. 002417799 | 0. 974375 | 0. 982734 |
| SMIM20    | 4p15. 2    | 0. 002412487  | 0. 974432 | 0. 982741 |
| NKAP      | Xq24       | 0. 002399933  | 0. 974565 | 0. 982826 |
| OR10A4    | 11p15. 4   | -0. 002379536 | 0. 974781 | 0. 982994 |
| MSH2      | 2p21-p16.  | -0. 002368548 | 0. 974897 | 0. 983062 |
| PLEKHS1   | 10q25. 3   | 0. 002339255  | 0. 975207 | 0. 98332  |
| RBM33     | 7q36. 3    | -0. 00233507  | 0. 975252 | 0. 98332  |
| CAMTA1    | 1p36. 31-f | 0. 002320423  | 0. 975407 | 0. 983427 |
| FAM47C    | Xp21. 1    | -0. 002311558 | 0. 975501 | 0. 983472 |
| APOBEC3C  | 22q13. 1   | 0. 002280669  | 0. 975828 | 0. 983753 |
| SPATA31D4 | 9q21. 32   | -0. 002234242 | 0. 97632  | 0. 984193 |
| PRAMEF22  | 1p36. 21   | 0. 002230151  | 0. 976363 | 0. 984193 |
| ASAP1-IT1 | 8q24. 21   | -0. 002215028 | 0. 976524 | 0. 984305 |
| ANAPC7    | 12q24. 11  | -0. 002199067 | 0. 976693 | 0. 984426 |
| GPR62     | 3p21. 2    | 0. 002172503  | 0. 976974 | 0. 984639 |
| C10RF56   | 1q21. 3    | 0. 002169774  | 0. 977003 | 0. 984639 |
| TBX18     | 6q14. 3    | 0. 002153036  | 0. 977181 | 0. 984768 |
| GAL3ST3   | 11q13. 1   | 0. 00212801   | 0. 977446 | 0. 984937 |
| CFAP221   | 2q14. 2    | -0. 002127931 | 0. 977447 | 0. 984937 |
| GNG12     | 1p31. 3    | 0. 002111188  | 0. 977624 | 0. 985016 |
| TDRD7     | 9q22. 33   | -0. 002111188 | 0. 977624 | 0. 985016 |
| ALDH1A3   | 15q26. 3   | -0. 002069341 | 0. 978067 | 0. 985413 |
| DOK5      | 20q13. 2   | 0. 002048417  | 0. 978289 | 0. 985559 |
| ATP1B4    | Xq24       | 0. 002046361  | 0. 978311 | 0. 985559 |
| TMEM129   | 4p16. 3    | -0. 002033771 | 0. 978444 | 0. 985644 |
| CCDC50    | 3q28       | 0. 002027494  | 0. 978511 | 0. 985661 |
| RPL13A    | 19q13. 33  | -0. 002017032 | 0. 978622 | 0. 985723 |
| KIFC3     | 16q21      | 0. 002008662  | 0. 97871  | 0. 985763 |
| TMEM98    | 17q11. 2   | 0. 001975185  | 0. 979065 | 0. 986071 |
| COPZ2     | 17q21. 32  | -0. 001962631 | 0. 979198 | 0. 986155 |
| KCNMB3    | 3q26. 32   | -0. 001931245 | 0. 979531 | 0. 986391 |
| ZNF830    | 17q12      | -0. 001931245 | 0. 979531 | 0. 986391 |
| SEMA3A    | 7q21. 11   | 0. 001914506  | 0. 979708 | 0. 986519 |
| TRIM6-TRI | 11p15. 4   | -0. 001899384 | 0. 979868 | 0. 986631 |
| HARS      | 5q31. 3    | 0. 001887306  | 0. 979996 | 0. 986656 |
| HNRNPCL3  | 1p36. 21   | 0. 001885214  | 0. 980018 | 0. 986656 |
| MOV10L1   | 22q13. 33  | -0. 001883121 | 0. 980041 | 0. 986656 |
| FAM215A   | 17q21. 31  | 0. 001873879  | 0. 980139 | 0. 986704 |
| METTL21EF | 13q33. 1   | -0. 001827554 | 0. 980629 | 0. 987149 |
| RGS1      | 1q31. 2    | 0. 001822443  | 0. 980684 | 0. 987154 |
| LINC00926 | 15q21. 3   | 0. 001811981  | 0. 980795 | 0. 987216 |
| UTF1      | 10q26. 3   | 0. 001802803  | 0. 980892 | 0. 987264 |
| SIX6      | 14q23. 1   | 0. 001797489  | 0. 980948 | 0. 987271 |
| KNDC1     | 10q26. 3   | 0. 001780595  | 0. 981127 | 0. 987396 |
| PRDM16    | 1p36. 32   | 0. 001776411  | 0. 981171 | 0. 987396 |
| OR2AT4    | 11q13. 4   | 0. 00174554   | 0. 981499 | 0. 987676 |
| BSND      | 1p32. 3    | -0. 001710534 | 0. 98187  | 0. 987992 |
| C3ORF22   | 3q21. 3    | -0. 001706523 | 0. 981912 | 0. 987992 |
| UAP1      | 1q23. 3    | -0. 001673885 | 0. 982258 | 0. 98829  |
| FUT10     | 8p12       | 0. 001659239  | 0. 982413 | 0. 988397 |
| CWC22     | 2q31. 3    | 0. 001644592  | 0. 982568 | 0. 988498 |
| ZC4H2     | Xq11. 2    | 0. 001640408  | 0. 982613 | 0. 988498 |
| CHST5     | 16q23. 1   | 0. 001627853  | 0. 982746 | 0. 988567 |
| ALKBH4    | 7q22. 1    | -0. 001621576 | 0. 982812 | 0. 988567 |



|           |          |              |          |          |
|-----------|----------|--------------|----------|----------|
| EXT2      | 11p11.2  | 0.001615299  | 0.982879 | 0.988567 |
| RSL1D1    | 16p13.13 | 0.001615299  | 0.982879 | 0.988567 |
| PRSS23    | 11q14.2  | 0.001600653  | 0.983034 | 0.988673 |
| NHLRC4    | 16p13.3  | -0.001590191 | 0.983145 | 0.988735 |
| IFNA2     | 9p21.3   | -0.001583794 | 0.983213 | 0.988753 |
| CPAMD8    | 19p13.11 | 0.001554621  | 0.983522 | 0.989014 |
| PRDM6     | 5q23.2   | -0.001485573 | 0.984254 | 0.989651 |
| RBM10     | Xp11.3   | 0.001485573  | 0.984254 | 0.989651 |
| KRTAP20-4 | 21q22.11 | 0.001450556  | 0.984625 | 0.989924 |
| BOLL      | 2q33.1   | 0.001446301  | 0.98467  | 0.989924 |
| MC5R      | 18p11.21 | -0.00144587  | 0.984674 | 0.989924 |
| VAT1      | 17q21.31 | -0.001433264 | 0.984808 | 0.990009 |
| HLA-DRB6  | 6p21.32  | 0.001428034  | 0.984863 | 0.990015 |
| GCDH      | 19p13.13 | 0.001408156  | 0.985074 | 0.990177 |
| SI        | 3q26.1   | 0.00138255   | 0.985346 | 0.9904   |
| BLM       | 15q26.1  | -0.001311908 | 0.986094 | 0.991103 |
| CRYAA     | 21q22.3  | -0.001291686 | 0.986309 | 0.99123  |
| ZIC4      | 3q24     | 0.001290559  | 0.986321 | 0.99123  |
| UNC119    | 17q11.2  | -0.001280522 | 0.986427 | 0.991232 |
| TCTEX1D4  | 1p34.1   | 0.00127843   | 0.986449 | 0.991232 |
| CSNK2A1   | 20p13    | 0.001276338  | 0.986471 | 0.991232 |
| MCHR1     | 22q13.2  | -0.001242873 | 0.986826 | 0.991534 |
| ZNF701    | 19q13.41 | 0.001238675  | 0.98687  | 0.991534 |
| UGT3A2    | 5p13.2   | -0.001231789 | 0.986943 | 0.991557 |
| OR2W5     | 1q44     | -0.00120447  | 0.987233 | 0.991798 |
| PCDHGB2   | 5q31.3   | -0.001196828 | 0.987314 | 0.99183  |
| IGSF11    | 3q13.32  | 0.001186366  | 0.987425 | 0.991891 |
| AKAP4     | Xp11.22  | 0.001174103  | 0.987555 | 0.99192  |
| AMTN      | 4q13.3   | 0.001169887  | 0.987599 | 0.99192  |
| RNF214    | 11q23.3  | 0.001169627  | 0.987602 | 0.99192  |
| OGT       | Xq13.1   | -0.001159166 | 0.987713 | 0.991981 |
| MAGI3     | 1p13.2   | -0.001146611 | 0.987846 | 0.992065 |
| PLD4      | 14q32.33 | 0.001138242  | 0.987935 | 0.992104 |
| FAM220A   | 7p22.1   | 0.001121503  | 0.988112 | 0.992233 |
| DLEU2     | 13q14.2  | 0.001111041  | 0.988223 | 0.992294 |
| OR2T3     | 1q44     | 0.001078224  | 0.988571 | 0.992594 |
| OTUD6B    | 8q21.3   | 0.00105664   | 0.9888   | 0.992773 |
| FAM71A    | 1q32.3   | 0.001025851  | 0.989126 | 0.993051 |
| AHRR      | 5p15.33  | 0.001010608  | 0.989288 | 0.993164 |
| PRSS37    | 7q34     | 0.000990787  | 0.989498 | 0.993325 |
| C9ORF163  | 9q34.3   | -0.000966669 | 0.989753 | 0.993526 |
| SIX2      | 2p21     | 0.000962485  | 0.989798 | 0.993526 |
| CCNQP1    | 1q32.1   | 0.000949093  | 0.98994  | 0.993554 |
| CNDP1     | 18q22.3  | 0.000948843  | 0.989942 | 0.993554 |
| GGT7      | 20q11.22 | -0.000945745 | 0.989975 | 0.993554 |
| APOL5     | 22q12.3  | -0.000928424 | 0.990159 | 0.993689 |
| TRIM46    | 1q22     | 0.000922729  | 0.990219 | 0.993699 |
| OR2J3     | 6p22.1   | -0.000912599 | 0.990327 | 0.993757 |
| GK2       | 4q21.21  | 0.000906211  | 0.990394 | 0.993775 |
| HOXB4     | 17q21.32 | 0.00084322   | 0.991062 | 0.994395 |
| LST1      | 6p21.33  | 0.000830666  | 0.991195 | 0.994438 |
| PIH1D3    | Xq22.3   | 0.000829793  | 0.991204 | 0.994438 |
| FABP2     | 4q26     | -0.000787607 | 0.991651 | 0.994837 |
| PPP1R21   | 2p16.3   | -0.000780449 | 0.991727 | 0.994863 |

|           |           |              |          |          |
|-----------|-----------|--------------|----------|----------|
| TUBB8     | 10p15.3   | -0.000774172 | 0.991794 | 0.99488  |
| COL4A5    | Xq22.3    | -0.000767895 | 0.99186  | 0.994897 |
| TNF       | 6p21.33   | -0.000707217 | 0.992503 | 0.995492 |
| PPP1R3C   | 10q23.32  | 0.000698847  | 0.992592 | 0.995525 |
| ADAMTS10  | 19p13.2   | 0.000694662  | 0.992637 | 0.995525 |
| FAM221B   | 9p13.3    | 0.000684898  | 0.99274  | 0.995579 |
| PRAMEF10  | 1p36.21   | 0.000672809  | 0.992868 | 0.995632 |
| OTOF      | 2p23.3    | 0.000669554  | 0.992903 | 0.995632 |
| SPRR2B    | 1q21.3    | 0.000665844  | 0.992942 | 0.995632 |
| SPATA31D  | 9q21.32   | -0.00065507  | 0.993056 | 0.995693 |
| SP5       | 2q31.1    | 0.000650723  | 0.993102 | 0.995693 |
| IN080D    | 2q33.3    | -0.000642353 | 0.993191 | 0.995732 |
| CSKMT     | 11q12.3   | 0.000629799  | 0.993324 | 0.995765 |
| POLE3     | 9q32      | 0.000629799  | 0.993324 | 0.995765 |
| FGF5      | 4q21.21   | -0.000623641 | 0.993389 | 0.995781 |
| NCOR1P1   | 20p11.1   | 0.000606697  | 0.993569 | 0.995911 |
| LETM1     | 4p16.3    | 0.000590045  | 0.993745 | 0.996038 |
| ACADVL    | 17p13.1   | -0.000579583 | 0.993856 | 0.996083 |
| LIPF      | 10q23.31  | 0.000576192  | 0.993892 | 0.996083 |
| SNAPC5    | 15q22.31  | -0.000571213 | 0.993945 | 0.996083 |
| ERP27     | 12p12.3   | -0.000567029 | 0.993989 | 0.996083 |
| OR10W1    | 11q12.1   | -0.000555449 | 0.994112 | 0.996138 |
| AAR2      | 20q11.23  | 0.000552382  | 0.994145 | 0.996138 |
| MSTO2P    | 1q22      | 0.000516812  | 0.994522 | 0.996416 |
| KLHL26    | 19p13.11  | 0.000508443  | 0.99461  | 0.996416 |
| TLR9      | 3p21.2    | 0.000508443  | 0.99461  | 0.996416 |
| TMBIM6    | 12q13.12  | 0.00050635   | 0.994633 | 0.996416 |
| PSEN2     | 1q42.13   | 0.000500073  | 0.994699 | 0.996416 |
| FKBP1AP1  | 19q13.43  | -0.000497982 | 0.994721 | 0.996416 |
| EHMT1-IT1 | 19q34.3   | 0.000479232  | 0.99492  | 0.996516 |
| ACVR2A    | 2q22.3-q2 | -0.00047915  | 0.994921 | 0.996516 |
| IMPG1     | 6q14.1    | -0.000448813 | 0.995243 | 0.996789 |
| LINC0155E | 1p22.3    | -0.000372092 | 0.996056 | 0.997553 |
| OR6W1P    | 7q34      | 0.000361983  | 0.996163 | 0.99761  |
| PUS10     | 2p16.1-p1 | -0.00035047  | 0.996285 | 0.99763  |
| SLC6A18   | 5p15.33   | 0.000347708  | 0.996314 | 0.99763  |
| OR11G2    | 14q11.2   | 0.000344811  | 0.996345 | 0.99763  |
| CYP4A11   | 1p33      | 0.000341258  | 0.996383 | 0.99763  |
| AMOTL2    | 3q22.2    | 0.000301299  | 0.996806 | 0.998005 |
| CETN2     | Xq28      | 0.000282468  | 0.997006 | 0.998104 |
| TMEM59    | 1p32.3    | 0.000282468  | 0.997006 | 0.998104 |
| GRIK1-AS1 | 21q21.3   | -0.00026409  | 0.997201 | 0.998249 |
| LY6G6D    | 6p21.33   | 0.000236085  | 0.997497 | 0.998497 |
| ALDH1A2   | 15q21.3   | 0.000217605  | 0.997693 | 0.998637 |
| KPNA1     | 3q21.1    | -0.00021342  | 0.997738 | 0.998637 |
| SUN3      | 7p12.3    | 0.000199653  | 0.997884 | 0.998679 |
| VIL1      | 2q35      | -0.000196682 | 0.997915 | 0.998679 |
| OR6C4     | 12q13.2   | -0.000195372 | 0.997929 | 0.998679 |
| LYPD4     | 19q13.2   | 0.000185338  | 0.998035 | 0.99872  |
| NSD2      | 4p16.3    | 0.000182035  | 0.99807  | 0.99872  |
| CEP152    | 15q21.1   | -0.000163204 | 0.99827  | 0.998836 |
| MORC2-AS1 | 22q12.2   | 0.000156927  | 0.998337 | 0.998836 |
| RPP30     | 10q23.31  | 0.000156927  | 0.998337 | 0.998836 |
| COL9A3    | 20q13.33  | 0.000138096  | 0.998536 | 0.998986 |

|           |          |              |          |          |
|-----------|----------|--------------|----------|----------|
| LILRP2    | 19q13.42 | 0.000102787  | 0.99891  | 0.999285 |
| ADRB3     | 8p11.23  | 0.000100445  | 0.998935 | 0.999285 |
| POLR1C    | 6p21.1   | 9.4156E-05   | 0.999002 | 0.999302 |
| TEX12     | 11q23.1  | 7.17926E-05  | 0.999239 | 0.999479 |
| HIST1H2AK | 6p22.1   | 6.69842E-05  | 0.99929  | 0.999479 |
| POLR3C    | 1q21.1   | -6.06783E-05 | 0.999357 | 0.999479 |
| COLGALT2  | 1q25.3   | 5.8586E-05   | 0.999379 | 0.999479 |
| GPR68     | 14q32.11 | 5.23089E-05  | 0.999446 | 0.999496 |
| LINC00671 | 17q21.31 | 2.52026E-05  | 0.999733 | 0.999733 |

---
